# Supplementary material for: Highly regioselective and diastereodivergent aminomethylative annulation of dienyl alcohols enabled by a hydrogen-bonding assisting effect
Source: Royal Society of Chemistry journal article supplement (doi:10.1039/d1sc06479g), 2022-01-01
Supplement: d1sc06479g1.pdf [file d1sc06479g1.pdf]

Electronic Supplementary Information

**Highly Regioselective and Ligand-Controlled Diastereodivergent  
Aminomethylative Annulation of Dienyl Alcohols Enabled by  
Hydrogen-Bonding Assisting Effect**

Yao Huang,<sup>a</sup> Suchen Zou,<sup>a</sup> Bangkui Yu,<sup>a</sup> Xuyang Yan,<sup>a</sup> Song Liu<sup>c,\*</sup> and Hanmin  
Huang<sup>a,b,\*</sup>

<sup>a</sup>Department of Chemistry, School of Chemistry and Material Science, Center for Excellence in Molecular Synthesis of CAS, University of Science and Technology of China, Hefei, 230026, P. R. China.

<sup>b</sup>Key Laboratory of Green and Precise Synthetic Chemistry and Applications, Ministry of Education, Huaibei Normal University, Huaibei, Anhui, 235000, P. R. China.

<sup>c</sup>Chongqing Key Laboratory of Environmental Materials and Remediation Technologies, Chongqing University of Arts and Sciences, Chongqing, 402160, P. R. China.

\*e-mail: hanmin@ustc.edu.cn

**Table of contents**

|     |                                                        |     |
|-----|--------------------------------------------------------|-----|
| 1.  | General Information.....                               | 2   |
| 2.  | Optimization of the Reaction Conditions .....          | 3   |
| 3.  | General Procedure for the Catalytic Reaction .....     | 7   |
| 4.  | Preparation and Characterization Data of Dienols ..... | 8   |
| 5.  | Experimental Characterization Data for Products .....  | 21  |
| 6.  | Synthetic Transformation of Products.....              | 50  |
| 7.  | Catalytic Asymmetric Reactions with Chiral L4 .....    | 59  |
| 8.  | Copies of HPLC of products .....                       | 64  |
| 9.  | Mechanistic Experiments .....                          | 71  |
| 10. | X-ray Crystallographic Data .....                      | 81  |
| 11. | References .....                                       | 85  |
| 12. | Copies of NMR of Materials and Products.....           | 86  |
| 13. | Computational data .....                               | 288 |

## General Information

All non-aqueous reactions and manipulations were using standard Schlenk techniques. All solvents before use were dried and degassed by standard methods and stored under nitrogen atmosphere. All reactions were monitored by TLC with silica gel-coated plates. NMR spectra were recorded on Bruker 400 spectromete and Bruker AV500M spectromete. Chemical shifts were reported in parts per million (ppm) down field from TMS with the solvent resonance as the internal standard. Coupling constants ( $J$ ) were reported in Hz and refered to apparent peak multiplications. High resolution mass spectra (HRMS) were recorded on Bruker MicroTOF-QII mass (ESI). High performance liquid chromatography (HPLC) was recorded on Agilent 1260 instument. GC analysis were performed on Agilent 7890B instrument with Hp-5 column. GC-MS analysis were performed with Agilent 7890B/5975B GC-MS system. All commercially available compounds were purchased from Adamas or Energy Chemical. Aminals used here were known compounds and synthesized according to the reported methods<sup>1,2</sup>. Dienols used here were synthesized according to the reported methods<sup>3-5</sup>. Flash column chromatography was performed using 200-300 mesh silica gels.

## 1. Optimization of the Reaction Conditions

*N,N,N',N'*-tetrabenzylmethanediamine **2a** (146 mg, 0.36 mmol), [Pd(allyl)Cl]<sub>2</sub> (2.8 mg, 2.5 mol%), AgOTf (4.6 mg, 6 mol%), bidentate phosphine ligand (0.015 mmol, 5 mol%) or monodentate phosphine ligand (0.03 mmol, 10 mol%), (2-(buta-1,3-dien-1-yl)phenyl)methanol **1a** (48 mg, 0.30 mmol) and toluene (1.0 mL) were added to a 25 mL flame-dried Young-type tube under N<sub>2</sub> atmosphere. The reaction mixture was stirred at designed temperature for 12 hours, and then cooled to room temperature. The solvent was removed under reduced pressure, the crude product was purified by flash chromatography (eluted with petroleum ether/ethyl acetate = 200/1 to 50/1) on a silica gel to give the desired products **3aa**, **4aa** and **5aa**. The dr value of the crude reaction mixture was determined by <sup>1</sup>H NMR analysis.

**Table S1. Screening of ligands<sup>a</sup>**

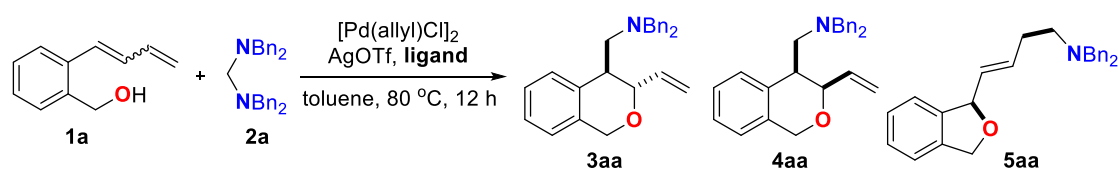

| entry | ligand | yield (%)<br>3aa + 4aa | 3aa/4aa <sup>b</sup> | yield (%)<br>5aa |
|-------|--------|------------------------|----------------------|------------------|
| 1     | L1     | 40                     | 5:1                  | 45               |
| 2     | L2     | 59                     | >20:1                | trace            |
| 3     | L3     | 43                     | >20:1                | trace            |
| 4     | L4     | 50                     | 1:5                  | trace            |
| 5     | L5     | 28                     | >20:1                | trace            |
| 6     | L6     | 14                     | >20:1                | trace            |
| 7     | L7     | 18                     | >20:1                | trace            |
| 8     | L8     | 14                     | >20:1                | trace            |
| 9     | L9     | 17                     | >20:1                | trace            |
| 10    | L10    | 63                     | 18:1                 | 5                |
| 11    | L11    | trace                  | -                    | -                |
| 12    | L12    | trace                  | -                    | -                |
| 13    | L13    | trace                  | -                    | -                |
| 14    | L14    | 49                     | >20:1                | 3                |
| 15    | L15    | 51                     | >20:1                | 10               |
| 16    | L16    | 51                     | 14:1                 | trace            |
| 17    | L17    | 65                     | >20:1                | 14               |
| 18    | L18    | 72                     | 8:1                  | 10               |

<sup>a</sup>Reaction conditions: **1a** (0.3 mmol), **2a** (0.36 mmol), [Pd(allyl)Cl]<sub>2</sub> (2.5 mol%), AgOTf (6 mol%), bidentate phosphine ligand (5 mol%) or monodentate phosphine ligand (10 mol%), toluene (1.0 mL), 80 °C, 12 h, isolated yield. <sup>b</sup>The ratio of **3aa** and **4aa** was determined by <sup>1</sup>H NMR.

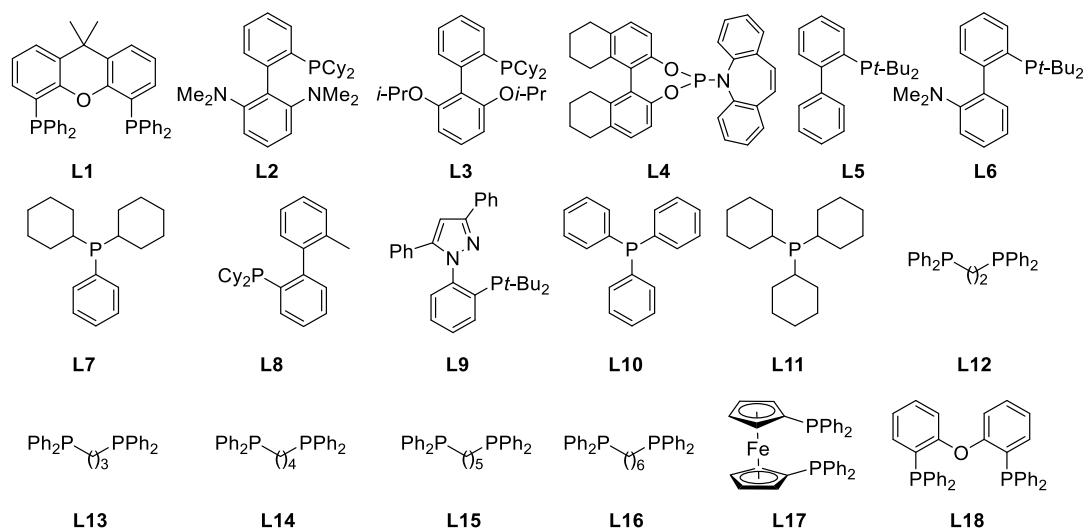

**Figure S1.** The structure of ligands

## 2.1 Optimization of the reaction conditions for the synthesis of **3aa**

*N,N,N',N'*-tetrabenzylmethanediamine **2a** (146 mg, 0.36 mmol), palladium salt (0.015 mmol, 5 mol%), silver salt (6 mol% or 12 mol%), **L2** (0.03 mmol, 10 mol%), (2-(buta-1,3-dien-1-yl)phenyl)methanol **1a** (48 mg, 0.30 mmol) and solvent (1.0 mL) were added to a 25 mL flame-dried Young-type tube under N<sub>2</sub> atmosphere. The reaction mixture was stirred at designed temperature for 12 hours, and then cooled to room temperature. The solvent was removed under reduced pressure, the crude product was purified by flash chromatography (eluted with petroleum ether/ethyl acetate = 200/1 to 50/1) on a silica gel to give the desired product **3aa**. The dr value of the crude reaction mixture was determined by <sup>1</sup>HNMR analysis.

**Table S2.** Optimization of the reaction conditions for the synthesis of **3aa**<sup>a</sup>



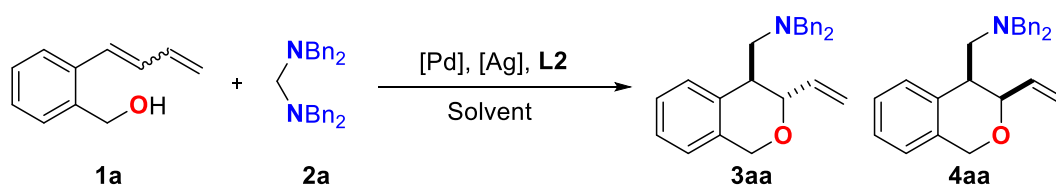

| entry                 | [Pd]                             | [Ag] (x mol%)          | Solvent                                               | yield (%)<br>3aa + 4aa | 3aa/4aa <sup>d</sup> |
|-----------------------|----------------------------------|------------------------|-------------------------------------------------------|------------------------|----------------------|
| 1                     | [Pd(allyl)Cl] <sub>2</sub>       | AgOTf (6)              | toluene                                               | 59                     | >20:1                |
| 2                     | PdCl <sub>2</sub>                | AgOTf (12)             | toluene                                               | 48                     | >20:1                |
| 3                     | PdBr <sub>2</sub>                | AgOTf (12)             | toluene                                               | 50                     | >20:1                |
| 4                     | Pd(COD)Cl <sub>2</sub>           | AgOTf (12)             | toluene                                               | 52                     | >20:1                |
| 5                     | [Pd(allyl)Cl] <sub>2</sub>       | AgOTf (6)              | CH <sub>3</sub> CN                                    | 47                     | 20:1                 |
| 6                     | [Pd(allyl)Cl] <sub>2</sub>       | AgOTf (6)              | DME                                                   | 60                     | >20:1                |
| 7                     | [Pd(allyl)Cl] <sub>2</sub>       | AgOTf (6)              | anisole                                               | 60                     | >20:1                |
| 8                     | [Pd(allyl)Cl] <sub>2</sub>       | AgOTf (6)              | THF                                                   | 22                     | >20:1                |
| 9                     | [Pd(allyl)Cl] <sub>2</sub>       | AgOTf (6)              | CH <sub>2</sub> Cl <sub>2</sub>                       | 65                     | 18:1                 |
| 10                    | [Pd(allyl)Cl] <sub>2</sub>       | AgOTf (6)              | DMF                                                   | 29                     | 20:1                 |
| 11                    | [Pd(allyl)Cl] <sub>2</sub>       | AgOTf (6)              | DMSO                                                  | 5                      | -                    |
| 12                    | [Pd(allyl)Cl] <sub>2</sub>       | AgOTf (6)              | CH <sub>2</sub> Cl <sub>2</sub> : toluene = 3 : 2     | 67                     | >20:1                |
| <b>13<sup>b</sup></b> | <b>[Pd(allyl)Cl]<sub>2</sub></b> | <b>AgOTf (6)</b>       | <b>CH<sub>2</sub>Cl<sub>2</sub> : toluene = 3 : 2</b> | <b>86</b>              | <b>&gt;20:1</b>      |
| 14 <sup>b</sup>       | [Pd(allyl)Cl] <sub>2</sub>       | AgBF <sub>4</sub> (6)  | CH <sub>2</sub> Cl <sub>2</sub> : toluene = 3 : 2     | 85                     | >20:1                |
| 15 <sup>b</sup>       | [Pd(allyl)Cl] <sub>2</sub>       | AgSbF <sub>6</sub> (6) | CH <sub>2</sub> Cl <sub>2</sub> : toluene = 3 : 2     | 71                     | 15:1                 |
| 16 <sup>b</sup>       | [Pd(allyl)Cl] <sub>2</sub>       | AgClO <sub>4</sub> (6) | CH <sub>2</sub> Cl <sub>2</sub> : toluene = 3 : 2     | 85                     | >20:1                |
| 17 <sup>b</sup>       | -                                | AgOTf (6)              | CH <sub>2</sub> Cl <sub>2</sub> : toluene = 3 : 2     | ND                     | -                    |
| 18 <sup>b</sup>       | [Pd(allyl)Cl] <sub>2</sub>       | -                      | CH <sub>2</sub> Cl <sub>2</sub> : toluene = 3 : 2     | 53                     | 11:1                 |
| 19 <sup>b,c</sup>     | [Pd(allyl)Cl] <sub>2</sub>       | AgOTf (6)              | CH <sub>2</sub> Cl <sub>2</sub> : toluene = 3 : 2     | 65                     | >20:1                |
| 20 <sup>b</sup>       | [Pd(allyl)Cl] <sub>2</sub>       | AgOTf (6)              | CH <sub>2</sub> Cl <sub>2</sub> : toluene = 2 : 3     | 73                     | >20:1                |
| 21 <sup>b</sup>       | [Pd(allyl)Cl] <sub>2</sub>       | AgOTf (6)              | CH <sub>2</sub> Cl <sub>2</sub> : toluene = 1 : 1     | 80                     | >20:1                |
| 22 <sup>b</sup>       | [Pd(allyl)Cl] <sub>2</sub>       | AgOTf (6)              | CH <sub>2</sub> Cl <sub>2</sub> : toluene = 4 : 1     | 84                     | >20:1                |

<sup>a</sup>Reaction conditions: **1a** (0.3 mmol), **2a** (0.36 mmol), [Pd] (5 mol%), [Ag] (6 mol% or 12 mol%), **L2** (10 mol%), solvent (1.0 mL), 80 °C, 12 h, isolated yield. <sup>b</sup>**1a** (0.36 mmol), **2a** (0.3 mmol). <sup>c</sup>**L2** (5 mol%). <sup>d</sup>The ratio of **3aa** and **4aa** was determined by <sup>1</sup>H NMR.

## 2.2 Optimization of the reaction conditions for the synthesis of **4aa**

*N,N,N',N'*-tetrabenzylmethanediamine **2a** (122 mg, 0.30 mmol), palladium salt (0.015 mmol, 5 mol%), silver salt (6 mol% or 12 mol%), **L4** (0.03 mmol, 10 mol%), (2-(buta-1,3-dien-1-yl)phenyl)methanol **1a** (58 mg, 0.36 mmol) and solvent (1.0 mL) were added to a 25 mL flame-dried Young-type tube under N<sub>2</sub> atmosphere. The reaction mixture was stirred at designed temperature for 12 hours, and then cooled to room temperature. The solvent was removed under reduced pressure, the crude product was purified by flash chromatography (eluted with petroleum ether/ethyl acetate = 200/1 to

50/1) on a silica gel to give the desired product **4aa**. The dr value of the crude reaction mixture was determined by <sup>1</sup>HNMR analysis.

**Table S3.** Optimization of the reaction conditions for the synthesis of **4aa**<sup>a</sup>

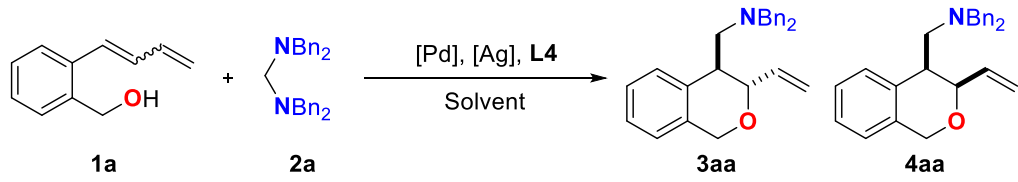

| entry                 | [Pd]                                                | [Ag] (x mol%)           | solvent                             | T/ °C     | yield (%)<br>3aa + 4aa | 3aa/4aa <sup>c</sup> |
|-----------------------|-----------------------------------------------------|-------------------------|-------------------------------------|-----------|------------------------|----------------------|
| 1                     | PdBr <sub>2</sub>                                   | AgOTf (12)              | CH <sub>2</sub> Cl <sub>2</sub>     | 80        | 90                     | 1:7                  |
| 2                     | PdI <sub>2</sub>                                    | AgOTf (12)              | CH <sub>2</sub> Cl <sub>2</sub>     | 80        | 88                     | 1:7                  |
| 3                     | Pd(CH <sub>3</sub> CN) <sub>2</sub> Cl <sub>2</sub> | AgOTf (12)              | CH <sub>2</sub> Cl <sub>2</sub>     | 80        | 88                     | 1:7                  |
| 4                     | Pd(COD)Cl <sub>2</sub>                              | AgOTf (12)              | CH <sub>2</sub> Cl <sub>2</sub>     | 80        | 75                     | 1:7                  |
| 5                     | Pd(COD)Br <sub>2</sub>                              | AgOTf (12)              | CH <sub>2</sub> Cl <sub>2</sub>     | 80        | 80                     | 1:5                  |
| 6                     | Pd(OAc) <sub>2</sub>                                | -                       | CH <sub>2</sub> Cl <sub>2</sub>     | 80        | trace                  | -                    |
| 7                     | [Pd(allyl)Cl] <sub>2</sub>                          | AgOTf (6)               | CH <sub>2</sub> Cl <sub>2</sub>     | 80        | 79                     | 1:5                  |
| 8                     | PdBr <sub>2</sub>                                   | AgOTf (12)              | CH <sub>2</sub> Cl <sub>2</sub>     | 60        | 84                     | 1:9                  |
| 9                     | PdBr <sub>2</sub>                                   | AgOTf (12)              | CH <sub>2</sub> Cl <sub>2</sub>     | 40        | 81                     | 1:10                 |
| 10                    | PdBr <sub>2</sub>                                   | AgOTf (12)              | CH <sub>2</sub> Cl <sub>2</sub>     | rt        | 62                     | 1:14                 |
| <b>11<sup>b</sup></b> | <b>PdBr<sub>2</sub></b>                             | <b>AgOTf (12)</b>       | <b>CH<sub>2</sub>Cl<sub>2</sub></b> | <b>rt</b> | <b>89</b>              | <b>1:14</b>          |
| 12 <sup>b</sup>       | PdBr <sub>2</sub>                                   | AgClO <sub>4</sub> (12) | CH <sub>2</sub> Cl <sub>2</sub>     | rt        | 84                     | 1:4                  |
| 13 <sup>b</sup>       | PdBr <sub>2</sub>                                   | AgBF <sub>4</sub> (12)  | CH <sub>2</sub> Cl <sub>2</sub>     | rt        | 87                     | 1:8                  |
| 14 <sup>b</sup>       | PdBr <sub>2</sub>                                   | AgPF <sub>6</sub> (12)  | CH <sub>2</sub> Cl <sub>2</sub>     | rt        | 87                     | 1:6                  |
| 15 <sup>b</sup>       | PdBr <sub>2</sub>                                   | AgSbF <sub>6</sub> (12) | CH <sub>2</sub> Cl <sub>2</sub>     | rt        | 87                     | 1:6                  |
| 16 <sup>b</sup>       | PdBr <sub>2</sub>                                   | AgOTf (12)              | toluene                             | rt        | 38                     | 1:8                  |
| 17 <sup>b</sup>       | PdBr <sub>2</sub>                                   | AgOTf (12)              | anisole                             | rt        | 67                     | 1:8                  |
| 18 <sup>b</sup>       | PdBr <sub>2</sub>                                   | AgOTf (12)              | DME                                 | rt        | 29                     | 1:13                 |
| 19 <sup>b</sup>       | PdBr <sub>2</sub>                                   | AgOTf (12)              | THF                                 | rt        | 35                     | 1:19                 |
| 20 <sup>b</sup>       | PdBr <sub>2</sub>                                   | AgOTf (12)              | 1,4-dioxane                         | rt        | 60                     | 1:14                 |

<sup>a</sup>Reaction conditions: **1a** (0.36 mmol), **2a** (0.30 mmol), [Pd] (5 mol%), [Ag] (6 mol% or 12 mol%), **L4** (10 mol%), solvent (1.0 mL), 12 h, isolated yield. <sup>b</sup>24 h. <sup>c</sup>The ratio of **3aa** and **4aa** was determined by <sup>1</sup>H NMR.

## 2. General Procedure for the Catalytic Reaction

### Method A:

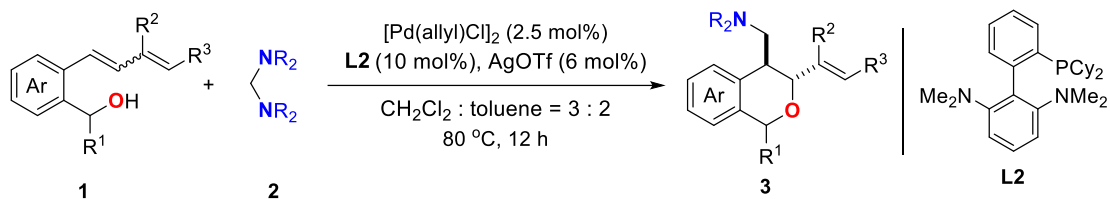

Aminal **2** (0.30 mmol), [Pd(allyl)Cl]<sub>2</sub> (2.8 mg, 2.5 mol%), **L2** (13.0 mg, 10 mol%), AgOTf (4.6 mg, 6 mol%), dienol **1** (0.36 mmol) and solvent (CH<sub>2</sub>Cl<sub>2</sub> : toluene = 3 : 2, 1.0 mL) were added to a 25 mL flame-dried Young-type tube under N<sub>2</sub> atmosphere. The reaction mixture was stirred at 80 °C for 12 hours, and then cooled to room temperature. The solvent was removed under reduced pressure, the residue was purified by flash chromatography (deluted with petroleum ether/ethyl acetate = 200/1 to 50/1) on a silica gel to give the desired product **3** as colorless oil. The dr value of the crude reaction mixture was determined by <sup>1</sup>HNMR analysis.

### Method B:

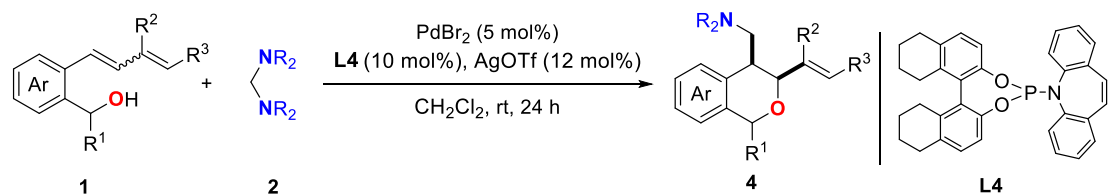

Aminal **2** (0.30 mmol), PdBr<sub>2</sub> (4.0 mg, 5 mol%), **L4** (16.0 mg, 10 mol%), AgOTf (9.3 mg, 12 mol%), dienol **1** (0.36 mmol) and CH<sub>2</sub>Cl<sub>2</sub> (1.0 mL) were added to a 25 mL flame-dried Young-type tube under N<sub>2</sub> atmosphere. The reaction mixture was stirred at room temperature for 24 hours. The solvent was removed under reduced pressure, the residue was purified by flash chromatography (deluted with petroleum ether/ethyl acetate = 200/1 to 50/1) on a silica gel to give the desired product **4** as colorless oil. The dr value of the crude reaction mixture was determined by <sup>1</sup>HNMR analysis.

### 3. Preparation and Characterization Data of Dienols

#### 3.1. Preparation of Dienol Derivatives

##### General Procedure A. Synthesis of dienol substrates **1a-1l** and **1p**.

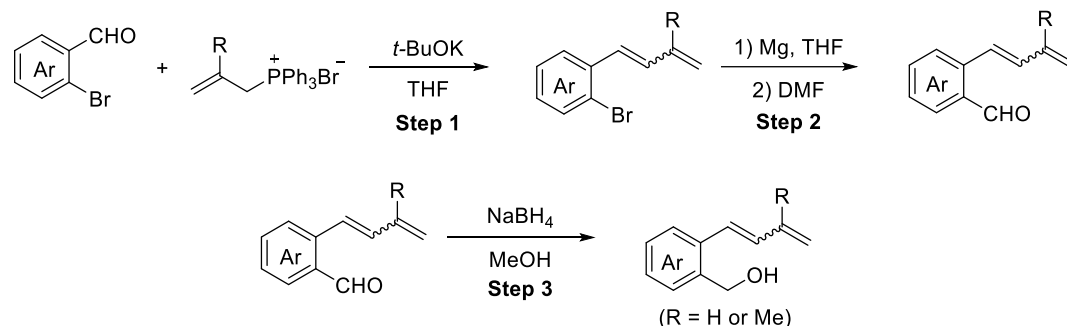

**Step 1.** *t*-BuOK (14.6 g, 130 mmol) was added to a stirred suspension of allyltriphenylphosphonium bromide (38.2 g, 100 mmol) in dry THF under N<sub>2</sub> at 0 °C, the mixture was then stirred at room temperature for 30 minutes. After the mixture was cooled again to 0 °C, 2-Bromobenzaldehyde (18.4 g, 84 mmol) in THF was added dropwise and the reaction was kept stirring for 3 hours with TLC detection. The mixture was poured into saturated aq. NH<sub>4</sub>Cl and extracted with EtOAc for 3 times. The combined organic extracts were dried over anhydrous Na<sub>2</sub>SO<sub>4</sub>, concentrated, and purified by flash column chromatography (deluted with petroleum ether) on a silica gel to afford conjugated dienes (14.9 g, 85% yield).

**Step 2.** A grain of I<sub>2</sub> and a small quantity of 1-bromo-2-(buta-1,3-dien-1-yl)benzene were added to the mixture of Mg (1.6 g, 66 mmol) and THF (50 mL) in a 200 mL three-neck flask under N<sub>2</sub> atmosphere. The reaction mixture was stirred under heating until the solution become colorless. Then a solution of 1-bromo-2-(buta-1,3-dien-1-yl)benzene (12.4 g, 60 mmol) in THF (50 mL) was added slowly to the reaction mixture and stirred at 90 °C for 12 hours. The reaction mixture was cooled to room temperature and *N,N*-dimethylformamide (6.9 mL, 90 mmol) was added dropwise to the solution. The reaction mixture was stirred at room temperature for 5 hours and quenched by saturated aq. NH<sub>4</sub>Cl (100 mL). The solvent was evaporated under reduced pressure and the residue was extracted by CH<sub>2</sub>Cl<sub>2</sub> (50 mL × 3). The combined organic layers were dried over anhydrous Na<sub>2</sub>SO<sub>4</sub>. After evaporation of the solvent under reduced pressure, the residue was purified by flash column chromatography (deluted with petroleum ether/ethyl acetate = 30/1) on a silica gel to afford 2-(buta-1,3-dien-1-yl)benzaldehyde (6.4 g, 67% yield).

**Step 3.** 2-(buta-1,3-dien-1-yl)benzaldehyde (4.5 g, 28.5 mmol) was dissolved in MeOH (50 mL). the reaction mixture was added NaBH<sub>4</sub> (1.6 g, 42.8 mmol) in portions at 0 °C and stirred at room temperature for 2 hours. The resulting mixture was quenched by saturated aq. NH<sub>4</sub>Cl (20 mL). The solvent was evaporated under reduced pressure and the residue was extracted by CH<sub>2</sub>Cl<sub>2</sub> (50 mL × 3). The combined organic layer was dried over anhydrous Na<sub>2</sub>SO<sub>4</sub>. After evaporation of the solvent under reduced pressure, the residue was purified by flash column chromatography (petroleum ether/ethyl acetate = 5/1) on a silica gel to afford (2-(buta-1,3-dien-1-yl)phenyl)methanol **1a** (4.0 g, 88% yield).

**General Procedure B. Synthesis of dienol substrates **1m** and **1n**.**

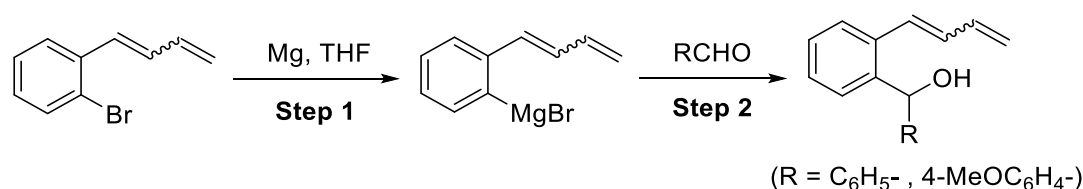

**Step 1.** A grain of I<sub>2</sub> and a small quantity of 1-bromo-2-(buta-1,3-dien-1-yl)benzene were added to the mixture of Mg (0.5 g, 22 mmol) and THF (50 mL) in a 200 mL three-neck flask under N<sub>2</sub> atmosphere. The reaction mixture was stirred with heating until the solution become colorless. Then a solution of 1-bromo-2-(buta-1,3-dien-1-yl)benzene (4.2 g, 20 mmol) in THF (50 mL) was added slowly to the reaction mixture and stirred at 90 °C for 12 hours. The reaction mixture was cooled to room temperature and used for next step.

**Step 2.** Benzaldehyde (2.1 g, 20 mmol) was dissolved in THF (50 mL) under N<sub>2</sub> atmosphere. Then (2-(buta-1,3-dien-1-yl)phenyl)magnesium bromide was added to the reaction mixture and stirred at 0 °C for 30 minutes and stirred at room temperature for 1 hour. After that, the reaction mixture was quenched by saturated aq. NH<sub>4</sub>Cl (100 mL). The reaction mixture was extracted with EtOAc (20 mL × 3) and dried over anhydrous Na<sub>2</sub>SO<sub>4</sub>. After evaporation of the solvent under reduced pressure, the residue was purified by flash chromatography (deluted with petroleum ether/ethyl acetate = 5:1) on a silica gel to give (2-(buta-1,3-dien-1-yl)phenyl)(phenyl)methanol **1m** (3.4 g, 71% yield).

**General Procedure C. Synthesis of dienol substrate **1o**.**

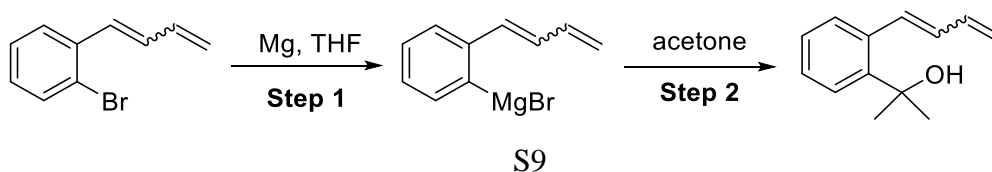

**Step 1.** A grain of I<sub>2</sub> and a small quantity of 1-bromo-2-(buta-1,3-dien-1-yl)benzene were added to the mixture of Mg (0.5 g, 22 mmol) and THF (50 mL) in a 200 mL three-neck flask under N<sub>2</sub> atmosphere. The reaction mixture was stirred with heating until the solution become colorless. Then a solution of 1-bromo-2-(buta-1,3-dien-1-yl)benzene (4.2 g, 20 mmol) in THF (50 mL) was added slowly to the reaction mixture and stirred at 90 °C for 12 hours. The reaction mixture was cooled to room temperature and used for next step.

**Step 2.** Acetone (1.2 g, 20 mmol) was dissolved in THF (50 mL) under N<sub>2</sub> atmosphere. Then the reaction mixture was added (2-(buta-1,3-dien-1-yl)phenyl)magnesium bromide and stirred at room temperature for 1 hour. After that, the reaction mixture was quenched by saturated aq. NH<sub>4</sub>Cl (100 mL). The reaction mixture was extracted with EtOAc (20 mL × 3) and dried over anhydrous Na<sub>2</sub>SO<sub>4</sub>. After evaporation of the solvent under reduced pressure, the residue was purified by flash chromatography (deluted with petroleum ether/ethyl acetate = 5:1) on a silica gel to give 2-(2-(buta-1,3-dien-1-yl)phenyl)propan-2-ol **1o** (2.0 g, 52% yield).

#### General Procedure D. Synthesis of dienol substrates **1q** and *E*-**1a**.

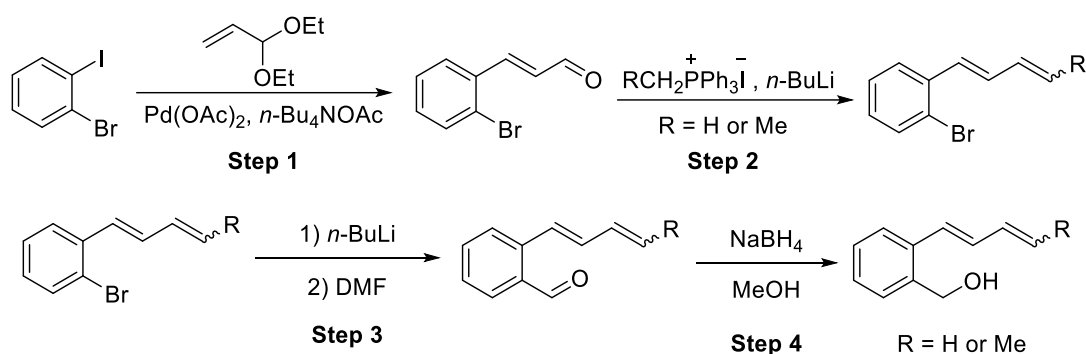

**Step 1.** The acrolein diethyl acetal (7.8 g, 60 mmol), Pd(OAc)<sub>2</sub> (200 mg, 2 mol%), K<sub>2</sub>CO<sub>3</sub> (9.0 g, 75 mmol), KCl (3.5 g, 50 mmol) and *n*-Bu<sub>4</sub>NOAc (30.2 g, 100 mmol) were added to a solution of 1-bromo-2-iodobenzene (14.1 g, 50 mmol) in DMF (100 mL). The mixture was stirred at 90 °C for 12 hours. After cooling to room temperature, 2 M HCl was slowly added to the reaction mixture and the mixture was stirred at room temperature for another 10 minutes. Then the mixture was extracted with Et<sub>2</sub>O (20 mL × 3) and dried with anhydrous Na<sub>2</sub>SO<sub>4</sub>. After evaporation of the solvent under reduced pressure, the residue was purified by flash column chromatography (deluted with petroleum ether/ethyl acetate = 50/1 to 20/1) on a silica gel to give the desired product (*E*)-3-(2-bromophenyl)acrylaldehyde (4.3 g, 41% yield).

**Step 2.** The *n*-butyllithium (2.5 M in Hexane, 9.6 mL, 24 mmol) was added dropwise to a suspension of methyl triphenylphosphonium iodide (9.2 g, 24 mmol) in THF (100 mL) at 0 °C. The mixture was stirred at 0 °C for 2 hours. A solution of (*E*)-3-(2-bromophenyl)acrylaldehyde (4.2 g, 20 mmol) in THF (30 mL) was added to the mixture and stirred at room temperature for 12 hours. Then the mixture was quenched with saturated aq. NH<sub>4</sub>Cl (50 mL) and extracted with CH<sub>2</sub>Cl<sub>2</sub> (50 mL × 3). The combined organic layer was dried over Na<sub>2</sub>SO<sub>4</sub>. After evaporation of the solvent under reduced pressure, the residue was purified by flash column chromatography (diluted with petroleum ether) on a silica gel to give the desired product (*E*)-1-bromo-2-(buta-1,3-dien-1-yl)benzene (2.8 g, 67% yield).

**Step 3.** The *n*-butyllithium (2.5 M in Hexane, 9.2 mL, 24 mmol) was added dropwise to a solution of (*E*)-1-bromo-2-(buta-1,3-dien-1-yl)benzene (2.8 g, 13.5 mmol) in THF (80 mL) at -78 °C. The mixture was stirred at 0 °C for 2 hours. After that, the *N,N*-dimethylformamide (3.1 mL, 40 mmol) was added dropwise to the solution and stirred at -78 °C for additional 30 minutes. The reaction mixture was quenched by saturated aq. NH<sub>4</sub>Cl (50 mL). The mixture was extracted with CH<sub>2</sub>Cl<sub>2</sub> and dried over anhydrous Na<sub>2</sub>SO<sub>4</sub>. After evaporation of the solvent under reduced pressure, the residue was purified by flash column chromatography (deluted with petroleum ether/ethyl acetate = 50/1 to 30/1) on a silica gel to afford (*E*)-2-(buta-1,3-dien-1-yl)benzaldehyde (1.3 g, 62% yield).

**Step 4.** (*E*)-2-(buta-1,3-dien-1-yl)benzaldehyde (1.3 g, 8.2 mmol) was dissolved in MeOH (50 mL). The reaction mixture was added NaBH<sub>4</sub> (0.5 g, 12.3 mmol) in portions at 0 °C and stirred at room temperature for 2 hours. The resulting mixture was quenched by saturated aq. NH<sub>4</sub>Cl (20 mL). The solvent was evaporated under reduced pressure and the residue was extracted by CH<sub>2</sub>Cl<sub>2</sub> (50 mL × 3). The combined organic layer was dried over anhydrous Na<sub>2</sub>SO<sub>4</sub>. After evaporation of the solvent under reduced pressure, the residue was purified by flash column chromatography (deluted with petroleum ether/ethyl acetate = 5/1) on a silica gel to afford (*E*)-(2-(buta-1,3-dien-1-yl)phenyl)methanol **E-1a** (1.1 g, 83% yield).

**General Procedure E.** Synthesis of dienol substrate **1r**.

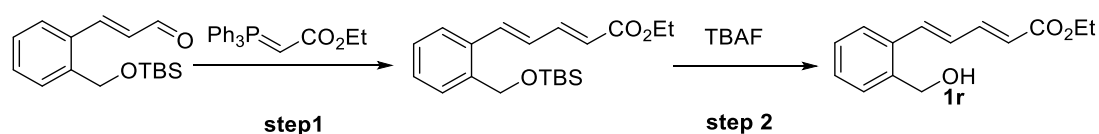

**Step 1.** A solution of (*E*)-3-(2-(((tert-butyl)dimethylsilyloxy)methyl)phenyl)acrylaldehyde (2.7 g, 10 mmol) in CH<sub>2</sub>Cl<sub>2</sub> (50 mL) was treated with ethyl 2-(triphenyl-1 $\lambda$ -phosphanyliden)acetate (4.2 g, 12 mmol). The reaction mixture was stirred at room temperature for 16 hours. After evaporation of the solvent under reduced pressure, the residue was treated with Hexanes / Et<sub>2</sub>O (9:1, 100 mL) and stirred for 15 minutes. The solvent was removed under reduced pressure, the residue was purified by flash chromatography (eluted with petroleum ether/ethyl acetate = 100/1 to 20/1) on a silica gel to afford ethyl (2*E*,4*E*)-5-(2-(((tert-butyl)dimethylsilyloxy)methyl)phenyl)penta-2,4-dienoate (2.3 g, 66% yield).

**Step 2.** Ethyl (2*E*,4*E*)-5-(2-(((tert-butyl)dimethylsilyloxy)methyl)phenyl)penta-2,4-dienoate was dissolved in THF (30 mL), the above solution was added TBAF (1.0 mol/L in THF, 8.0 mL) at room temperature and stirred for 2 hours. The reaction mixture was extracted with EtOAc (20 mL  $\times$  3) and dried over anhydrous Na<sub>2</sub>SO<sub>4</sub>. After evaporation of the solvent under reduced pressure, the residue was purified by flash chromatography (eluted with petroleum ether/ethyl acetate = 20/1 to 5/1) on a silica gel to afford ethyl (2*E*,4*E*)-5-(2-(hydroxymethyl)phenyl)penta-2,4-dienoate **1r** (1.2 g, 79% yield).



### 3.2. Characterization Data of Substrates

#### (2-(buta-1,3-dien-1-yl)phenyl)methanol (**1a**)

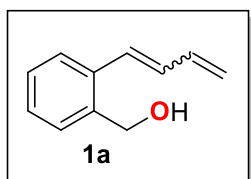

The title compound was prepared according to the general procedure and purified by column chromatography to give colorless oil, 4.3 g, 88% yield, (*E* / *Z* = 1 : 3.5). **<sup>1</sup>H NMR** (500 MHz, CDCl<sub>3</sub>) δ 7.55-7.57 (m, 0.22H), 7.40-7.43 (m, 0.78H), 7.22-7.35 (m, 3H), 6.33-6.91 (m, 3H), 5.33-5.38 (m, 1H), 5.17-5.21 (m, 1H), 4.74 (s, 0.47H), 4.65 (s, 1.53H), 1.80 (s, 1H); **<sup>13</sup>C NMR** (125 MHz, CDCl<sub>3</sub>) δ 138.8, 137.8, 137.4, 136.0, 135.7, 133.2, 132.3, 132.0, 130.1, 129.4, 128.7, 128.34, 128.33, 127.9, 127.8, 127.7, 127.5, 125.9, 119.8, 118.3, 63.6, 63.5; **HRMS** (ESI) calcd for C<sub>11</sub>H<sub>13</sub>O [M+H]<sup>+</sup>: 161.0966, found: 161.0963.

#### (*E*)-(2-(buta-1,3-dien-1-yl)phenyl)methanol (*E*-**1a**)

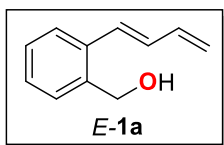

The title compound was prepared according to the general procedure and purified by column chromatography to give colorless oil, 1.1 g, 83% yield. **<sup>1</sup>H NMR** (400 MHz, CDCl<sub>3</sub>) δ 7.48-7.49 (m, 1H), 7.13-7.47 (m, 3H), 6.77 (d, *J* = 15.6 Hz, 1H), 6.66 (dd, *J* = 15.2 Hz, 10.0 Hz, 1H), 6.44-6.53 (m, 1H), 5.30 (d, *J* = 16.8 Hz, 1H), 5.15-5.17 (m, 1H), 4.55 (d, *J* = 2.4 Hz, 2H), 2.98 (s, 1H); **<sup>13</sup>C NMR** (100 MHz, CDCl<sub>3</sub>) δ 137.7, 137.4, 135.6, 131.6, 129.3, 128.4, 127.9, 127.6, 125.5, 118.0, 62.8; **HRMS** (ESI) calcd for C<sub>11</sub>H<sub>13</sub>O [M+H]<sup>+</sup>: 161.0966, found: 161.0957.

#### (2-(buta-1,3-dien-1-yl)-5-methylphenyl)methanol (**1b**)

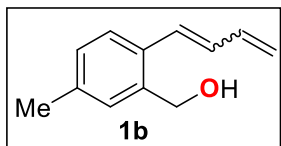

The title compound was prepared according to the general procedure and purified by column chromatography to give colorless oil, 1.8 g, 87% yield, (*E* / *Z* > 20 : 1). **<sup>1</sup>H NMR** (500 MHz, CDCl<sub>3</sub>) δ 7.47 (d, *J* = 7.5 Hz, 1H), 7.09-7.16 (m, 2H), 6.87 (d, *J* = 15.5 Hz, 1H), 6.68-6.74 (m, 1H), 6.50-6.57 (m, 1H), 5.31-5.34 (m, 1H), 5.16-5.18 (m, 1H), 4.71 (s, 2H), 2.34 (s, 3H), 1.67 (s, 1H); **<sup>13</sup>C NMR** (125 MHz, CDCl<sub>3</sub>) δ 137.8, 137.63, 137.55,

133.1, 131.2, 129.5, 129.3, 129.1, 125.8, 117.8, 63.6, 21.3; **HRMS** (ESI) calcd for  $C_{12}H_{15}O$   $[M+H]^+$ : 175.1117, found: 175.1117.

**(2-(buta-1,3-dien-1-yl)-5-methoxyphenyl)methanol (1c)**

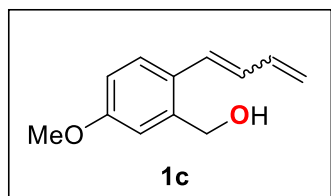

The title compound was prepared according to the general procedure and purified by column chromatography to give colorless oil, 1.5 g, 82% yield, (*E* / *Z* = 1 : 2).  **$^1H$  NMR** (500 MHz,  $CDCl_3$ )  $\delta$  7.17-7.47 (m, 1H), 6.99 (d, *J* = 3.0 Hz, 0.67H), 6.91 (d, *J* = 2.5 Hz, 0.33H), 6.60-6.81 (m, 2H), 6.25-6.59 (m, 2H), 5.27-5.34 (m, 1H), 5.12-5.16 (m, 1H), 5.36-5.41 (m, 1H), 4.68 (s, 0.65H), 4.60 (s, 1.35H), 3.78-3.79 (m, 3H), 2.16 (br, 1H);  **$^{13}C$  NMR** (125 MHz,  $CDCl_3$ )  $\delta$  159.4, 159.2, 140.4, 139.4, 137.6, 133.4, 131.4, 131.2, 130.1, 128.9, 128.2, 127.84, 127.80, 127.1, 119.2, 117.1, 113.7, 113.5, 113.0, 112.6, 63.2, 55.4; **HRMS** (ESI) calcd for  $C_{12}H_{15}O_2$   $[M+H]^+$ : 191.1067, found: 191.1068.

**(2-(buta-1,3-dien-1-yl)-4-methoxyphenyl)methanol (1d)**

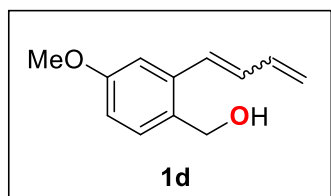

The title compound was prepared according to the general procedure and purified by column chromatography to give colorless oil, 1.3 g, 72% yield, (*E* / *Z* = 1 : 2.2).  **$^1H$  NMR** (500 MHz,  $CDCl_3$ )  $\delta$  7.21-7.30 (m, 1H), 6.78-7.08 (m, 2H), 6.62-6.77 (m, 1H), 6.32-6.61 (m, 2H), 5.34-5.38 (m, 1H), 5.17-5.22 (m, 1H), 4.65 (s, 0.69H), 4.56 (s, 1.31H), 3.80-3.82 (m, 3H), 1.81-1.86 (m, 1H);  **$^{13}C$  NMR** (125 MHz,  $CDCl_3$ )  $\delta$  159.6, 158.9, 137.5, 137.33, 137.27, 133.1, 132.3, 132.0, 131.3, 130.6, 130.6, 129.7, 129.4, 128.3, 120.0, 118.5, 115.8, 113.3, 112.7, 111.0, 63.09, 63.06, 55.43, 55.41; **HRMS** (ESI) calcd for  $C_{12}H_{15}O_2$   $[M+H]^+$ : 191.1067, found: 191.1066.

**(2-(buta-1,3-dien-1-yl)-4-((tert-butyldimethylsilyl)oxy)phenyl)methanol (1e)**

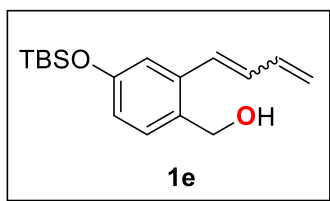

The title compound was prepared according to the general procedure and purified by column chromatography to give colorless oil, 2.4 g, 82% yield, (*E* / *Z* = 1 : 1.9). <sup>1</sup>H NMR (500 MHz, CDCl<sub>3</sub>) δ 6.95-7.05 (m, 1H), 6.54-6.83 (m, 2H), 6.10-6.52 (m, 3H), 5.14-5.18 (m, 1H), 4.98-5.01 (m, 1H), 4.42 (s, 0.70H), 4.33 (s, 1.30H), 1.94 (br, 1H), 0.80-0.81 (m, 9H), 0.01-0.02 (m, 6H); <sup>13</sup>C NMR (125 MHz, CDCl<sub>3</sub>) δ 155.6, 154.9, 137.4, 137.3, 137.1, 133.1, 132.0, 131.8, 131.7, 131.1, 130.3, 129.5, 129.4, 128.3, 121.6, 119.6, 119.3, 119.1, 118.2, 117.1, 62.91, 62.89, 25.7, 18.3, -4.3, -4.4; HRMS (ESI) calcd for C<sub>17</sub>H<sub>27</sub>O<sub>2</sub>Si [M+H]<sup>+</sup>: 291.1775, found: 291.1773.

#### (2-(buta-1,3-dien-1-yl)-4,5-dimethoxyphenyl)methanol (1f)

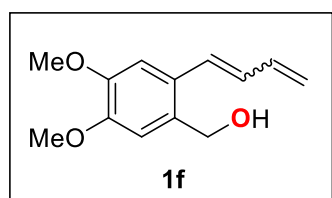

The title compound was prepared according to the general procedure and purified by column chromatography to give colorless oil, 1.6 g, 85% yield, (*E* / *Z* = 1 : 19). <sup>1</sup>H NMR (400 MHz, CDCl<sub>3</sub>) δ 7.01 (s, 1H), 6.87 (s, 1H), 6.54-6.66 (m, 2H), 6.34 (t, *J* = 11.2 Hz, 1H), 5.34-5.38 (m, 1H), 5.18-5.21 (m, 1H), 4.71 (s, 0.10H), 4.60 (s, 1.90H), 3.90 (s, 3H), 3.87 (m, 3H), 1.77 (br, 1H); <sup>13</sup>C NMR (100 MHz, CDCl<sub>3</sub>) δ 148.4, 147.9, 133.2, 131.7, 131.5, 128.2, 128.1, 119.6, 113.2, 111.4, 63.1, 56.2, 56.0; HRMS (ESI) calcd for C<sub>13</sub>H<sub>17</sub>O<sub>3</sub> [M+H]<sup>+</sup>: 221.1172, found: 221.1173.

#### (2-(buta-1,3-dien-1-yl)-5-fluorophenyl)methanol (1g)

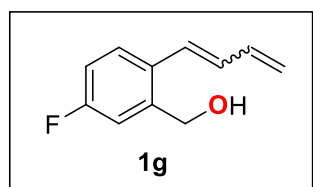

The title compound was prepared according to the general procedure and purified by column chromatography to give colorless oil, 2.5 g, 82% yield, (*E* / *Z* = 1 : 2.6). <sup>1</sup>H NMR (400 MHz, CDCl<sub>3</sub>) δ 7.09-7.50 (m, 2H), 6.92-6.98 (m, 1H), 6.30-6.79 (m, 3H), 5.32-5.39 (m, 1H), 5.18-5.21 (m, 1H), 4.71 (s, 0.55H), 4.62 (s, 1.45H), 2.04 (br, 1H); <sup>13</sup>C NMR (100 MHz, CDCl<sub>3</sub>) δ 163.7 (d, *J*<sub>C-F</sub> = 246 Hz), 163.6 (d, *J*<sub>C-F</sub> = 245 Hz), 141.3 (d, *J*<sub>C-F</sub> = 7 Hz), 140.1 (d, *J*<sub>C-F</sub> = 7 Hz), 137.2, 132.9, 132.5, 131.8 (d, *J*<sub>C-F</sub> = 2 Hz), 131.6 (d, *J*<sub>C-F</sub> = 8 Hz), 131.1 (d, *J*<sub>C-F</sub> = 3 Hz), 128.1, 127.6 (d, *J*<sub>C-</sub>

$F = 8$  Hz), 127.1, 120.1, 118.4, 115.0 (d,  $J_{C-F} = 13$  Hz), 114.7 (d,  $J_{C-F} = 14$  Hz), 114.3, 114.0, 113.8, 62.73, 62.72;  **$^{19}F$  NMR** (376 MHz,  $CDCl_3$ )  $\delta$  -114.0, -114.2; **HRMS** (ESI) calcd for  $C_{11}H_{12}FO$   $[M+H]^+$ : 179.0867, found: 179.0863.

### (2-(buta-1,3-dien-1-yl)-4-fluorophenyl)methanol (**1h**)

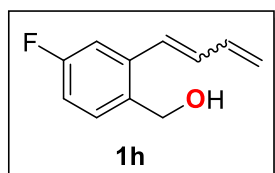

The title compound was prepared according to the general procedure and purified by column chromatography to give colorless oil, 2.3 g, 78% yield, ( $E/Z = 1 : 1$ ).  **$^1H$  NMR** (500 MHz,  $CDCl_3$ )  $\delta$  7.51 (dd,  $J = 9.0$  Hz, 6.0 Hz, 0.49H), 7.11-7.22 (m, 1.51H), 6.94-6.98 (m, 1H), 6.62-6.76 (m, 1H), 6.32-6.56 (m, 2H), 5.33-5.39 (m, 1H), 5.18-5.21 (m, 1H), 4.74 (s, 1H), 4.64 (s, 1H), 1.86 (br, 1H);  **$^{13}C$  NMR** (125 MHz,  $CDCl_3$ )  $\delta$  163.5 (d,  $J_{C-F} = 246$  Hz), 163.4 (d,  $J_{C-F} = 245$  Hz), 141.4 (d,  $J_{C-F} = 7$  Hz), 140.1 (d,  $J_{C-F} = 7$  Hz), 137.2, 132.9, 132.5, 131.9, 131.6 (d,  $J_{C-F} = 4$  Hz), 131.6 (d,  $J_{C-F} = 8$  Hz), 131.1 (d,  $J_{C-F} = 3$  Hz), 128.1, 127.6 (d,  $J_{C-F} = 8$  Hz), 127.2, 120.1, 118.4, 115.0 (d,  $J_{C-F} = 16$  Hz), 114.8 (d,  $J_{C-F} = 17$  Hz), 114.3 (d,  $J_{C-F} = 22$  Hz), 114.1 (d,  $J_{C-F} = 21$  Hz), 62.8;  **$^{19}F$  NMR** (470 MHz,  $CDCl_3$ )  $\delta$  -114.0, -114.3; **HRMS** (ESI) calcd for  $C_{11}H_{12}FO$   $[M+H]^+$ : 179.0867, found: 179.0865.

### (2-(buta-1,3-dien-1-yl)-3-fluorophenyl)methanol (**1i**)

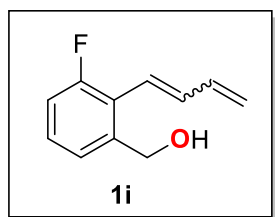

The title compound was prepared according to the general procedure and purified by column chromatography to give colorless oil, 1.3 g, 80% yield, ( $E/Z = 1.6 : 1$ ).  **$^1H$  NMR** (400 MHz,  $CDCl_3$ )  $\delta$  7.14-7.30 (m, 2H), 6.98-7.05 (m, 1H), 6.63-6.92 (m, 1H), 6.16-6.59 (m, 2H), 5.34-5.39 (m, 1H), 5.18-5.25 (m, 1H), 4.72 (s, 1.23H), 4.60 (s, 0.77H), 2.00 (br, 1H);  **$^{13}C$  NMR** (100 MHz,  $CDCl_3$ )  $\delta$  162.3 (d,  $J_{C-F} = 248$  Hz), 160.8 (d,  $J_{C-F} = 244$  Hz), 141.4 (d,  $J_{C-F} = 3$  Hz), 140.4 (d,  $J_{C-F} = 3$  Hz), 138.0, 136.9 (d,  $J_{C-F} = 10$  Hz), 134.7 (d,  $J_{C-F} = 1$  Hz), 133.3 (d,  $J_{C-F} = 2$  Hz), 129.0 (d,  $J_{C-F} = 9$  Hz), 128.3 (d,  $J_{C-F} = 9$  Hz), 124.1 (d,  $J_{C-F} = 3$  Hz), 123.8 (d,  $J_{C-F} = 12$  Hz), 123.3, 123.2 (d,  $J_{C-F} = 17$  Hz), 123.0 (d,  $J_{C-F} = 3$  Hz), 121.2, 120.3, 119.0, 115.7 (d,  $J_{C-F} = 23$  Hz), 114.9 (d,

$J_{C-F} = 23$  Hz), 63.3 (d,  $J_{C-F} = 3$  Hz), 62.9 (d,  $J_{C-F} = 3$  Hz);  $^{19}\text{F}$  NMR (376 MHz,  $\text{CDCl}_3$ )  $\delta$  -113.5, -113.8; **HRMS** (ESI) calcd for  $\text{C}_{11}\text{H}_{12}\text{FO}$   $[\text{M}+\text{H}]^+$ : 179.0867, found: 179.0867.

**(2-(buta-1,3-dien-1-yl)-5-chlorophenyl)methanol (1j)**

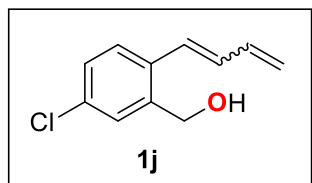

The title compound was prepared according to the general procedure and purified by column chromatography to give colorless oil, 2.2 g, 83% yield, ( $E/Z = 1 : 2.8$ ).  $^1\text{H}$  NMR (500 MHz,  $\text{CDCl}_3$ )  $\delta$  7.41-7.44 (m, 1H), 7.15-7.33 (m, 2H), 6.51-6.73 (m, 1H), 6.30-6.50 (m, 2H), 5.33-5.38 (m, 1H), 5.18-5.22 (m, 1H), 4.65 (s, 0.52H), 4.56 (s, 1.48H), 2.49-2.54 (m, 1H);  $^{13}\text{C}$  NMR (125 MHz,  $\text{CDCl}_3$ )  $\delta$  140.6, 139.4, 137.1, 134.0, 133.6, 133.4, 132.8, 132.7, 132.3, 131.2, 128.02, 127.99, 127.3, 127.2, 127.0, 126.9, 120.4, 118.8, 62.6, 62.5; **HRMS** (ESI) calcd for  $\text{C}_{11}\text{H}_{12}\text{ClO}$   $[\text{M}+\text{H}]^+$ : 195.0571, found: 195.0572.

**(2-(buta-1,3-dien-1-yl)-4-(trifluoromethyl)phenyl)methanol (1k)**

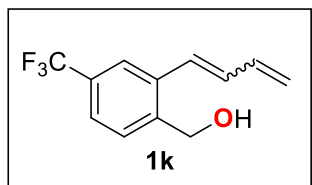

The title compound was prepared according to the general procedure and purified by column chromatography to give colorless oil, 1.8 g, 81% yield, ( $E/Z = 1 : 4.7$ ).  $^1\text{H}$  NMR (500 MHz,  $\text{CDCl}_3$ )  $\delta$  7.46-7.76 (m, 3H), 6.38-6.79 (m, 3H), 5.40-5.44 (m, 1H), 5.24-5.28 (m, 1H), 4.78 (s, 0.34H), 4.69 (s, 1.66H), 2.13 (br, 1H);  $^{13}\text{C}$  NMR (125 MHz,  $\text{CDCl}_3$ )  $\delta$  142.6, 141.2, 136.8, 136.4, 135.9, 133.6, 133.5, 132.4, 130.0 (q,  $J_{C-F} = 32$  Hz), 128.4, 127.7, 127.5, 126.6 (d,  $J_{C-F} = 4$  Hz), 125.3 (q,  $J_{C-F} = 270$  Hz), 124.4 (q,  $J_{C-F} = 4$  Hz), 124.2 (q,  $J_{C-F} = 4$  Hz), 122.6 (d,  $J_{C-F} = 4$  Hz), 121.3, 121.0, 119.8, 62.8, 62.7;  $^{19}\text{F}$  NMR (470 MHz,  $\text{CDCl}_3$ )  $\delta$  -62.5, -62.6; **HRMS** (ESI) calcd for  $\text{C}_{12}\text{H}_{12}\text{F}_3\text{O}$   $[\text{M}+\text{H}]^+$ : 229.0835, found: 229.0833.

**(2-(buta-1,3-dien-1-yl)naphthalen-1-yl)methanol (1l)**

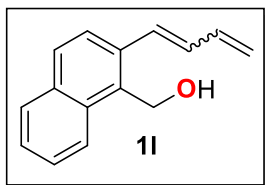

The title compound was prepared according to the general procedure and purified by column chromatography to give colorless oil, 1.0 g, 80% yield, (*E*/*Z* = 1 : 1.9). **<sup>1</sup>H NMR** (500 MHz, CDCl<sub>3</sub>) δ 8.16-8.17 (d, *J* = 8.5 Hz, 0.65H), 8.11-8.12 (d, *J* = 8.5 Hz, 0.35H), 7.70-7.80 (m, 2H), 7.31-7.62 (m, 3H), 6.51-7.20 (m, 2H), 6.36-6.49 (m, 1H), 5.33-5.39 (m, 1H), 5.14-5.23 (m, 1H), 5.07 (s, 0.70H), 5.01 (d, *J* = 3.5 Hz, 1.30H), 2.03-2.10 (m, 1H); **<sup>13</sup>C NMR** (125 MHz, CDCl<sub>3</sub>) δ 137.5, 134.5, 134.1, 133.3, 133.25, 133.16, 133.1, 132.7, 132.5, 132.4, 132.2, 130.0, 129.5, 128.9, 128.5, 128.3, 128.0, 127.0, 126.8, 125.8, 124.3, 124.2, 123.9, 120.0, 118.6, 59.1, 57.6; **HRMS** (ESI) calcd for C<sub>15</sub>H<sub>15</sub>O [M+H]<sup>+</sup>: 211.1117, found: 211.1117.

#### (2-(buta-1,3-dien-1-yl)phenyl)(phenyl)methanol (1m)

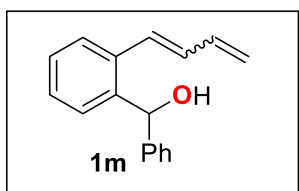

The title compound was prepared according to the general procedure and purified by column chromatography to give colorless oil, 3.4 g, 71% yield, (*E*/*Z* = 10.1 : 1). **<sup>1</sup>H NMR** (500 MHz, CDCl<sub>3</sub>) δ 7.45-7.47 (m, 1H), 7.34-7.36 (m, 1H), 7.22-7.27 (m, 4H), 7.15-7.21 (m, 3H), 6.79 (d, *J* = 15.5 Hz, 1H), 6.37-6.61 (m, 2H), 5.96 (d, *J* = 2.0 Hz, 0.91H), 5.87 (d, *J* = 1.5 Hz, 0.09H), 5.25-5.30 (m, 1H), 5.09-5.14 (m, 1H), 2.58-2.67 (m, 1H); **<sup>13</sup>C NMR** (125 MHz, CDCl<sub>3</sub>) δ 143.0, 140.6, 137.3, 135.4, 132.0, 129.8, 128.5, 127.8, 127.8, 127.5, 127.1, 126.9, 126.1, 118.1, 72.8; **HRMS** (ESI) calcd for C<sub>17</sub>H<sub>17</sub>O [M+H]<sup>+</sup>: 237.1274, found: 237.1274.

#### (2-(buta-1,3-dien-1-yl)phenyl)(4-methoxyphenyl)methanol (1n)

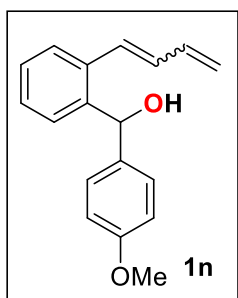

The title compound was prepared according to the general procedure and purified by column chromatography to give colorless oil, 2.3 g, 76% yield, (*E*/*Z* = 9.0 : 1). **<sup>1</sup>H NMR** (400 MHz, CDCl<sub>3</sub>) δ 7.43-7.55 (m, 2H), 7.11-7.32 (m, 4H), 6.72-6.84 (m, 3H), 6.21-6.65 (m, 2H), 6.01 (s, 0.90H), 5.89 (s, 0.10H), 5.26-5.32 (m, 1H), 5.11-5.16 (m, 1H), 3.74-3.75 (m, 3H), 2.37 (s, 1H); **<sup>13</sup>C NMR**

(100 MHz, CDCl<sub>3</sub>)  $\delta$  159.0, 140.8, 137.4, 135.3, 132.0, 129.8, 128.3, 127.9, 127.8, 126.8, 126.1, 118.1, 113.9, 72.6, 55.3; **HRMS** (ESI) calcd for C<sub>18</sub>H<sub>18</sub>O<sub>2</sub>Na [M+Na]<sup>+</sup>: 289.1204, found: 289.1205.

### 2-(2-(buta-1,3-dien-1-yl)phenyl)propan-2-ol (**1o**)

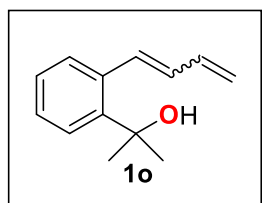

The title compound was prepared according to the general procedure and purified by column chromatography to give colorless oil, 2.0 g, 52% yield, (*E/Z* = 1 : 2.3). **<sup>1</sup>H NMR** (400 MHz, CDCl<sub>3</sub>)  $\delta$  7.26-7.58 (m, 2H), 7.01-7.25 (m, 3H), 6.27-6.62 (m, 2H), 5.29-5.35 (m, 1H), 5.11-5.17 (m, 1H), 1.84-2.03 (m, 1H), 1.66 (s, 1.80H), 1.61 (s, 4.20H); **<sup>13</sup>C NMR** (100 MHz, CDCl<sub>3</sub>)  $\delta$  146.3, 144.9, 137.8, 136.5, 135.2, 133.9, 133.6, 132.6, 132.3, 131.1, 130.6, 128.3, 127.52, 127.46, 126.7, 125.3, 125.2, 119.0, 117.4, 73.8, 31.5, 31.0; **HRMS** (ESI) calcd for C<sub>13</sub>H<sub>17</sub>O [M+H]<sup>+</sup>: 189.1279, found: 189.1260.

### (2-(3-methylbuta-1,3-dien-1-yl)phenyl)methanol (**1p**)

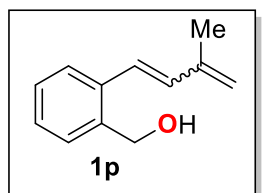

The title compound was prepared according to the general procedure and purified by column chromatography to give colorless oil, 1.2 g, 78% yield, (*E/Z* = 1 : 2.0). **<sup>1</sup>H NMR** (400 MHz, CDCl<sub>3</sub>)  $\delta$  7.11-7.59 (m, 4H), 6.26-6.86 (m, 2H), 4.93-5.13 (m, 2H), 4.73 (s, 0.66H), 4.62 (s, 1.34H), 2.08 (br, 1H), 1.98-1.99 (m, 1H), 1.50-1.51 (m, 2H); **<sup>13</sup>C NMR** (100 MHz, CDCl<sub>3</sub>)  $\delta$  142.3, 141.9, 138.4, 137.8, 137.0, 136.3, 134.2, 129.6, 128.5, 128.2, 127.6, 127.5, 127.4, 127.24, 127.17, 125.9, 125.3, 118.7, 117.9, 63.50, 63.46, 22.0, 18.7; **HRMS** (ESI) calcd for C<sub>12</sub>H<sub>15</sub>O [M+H]<sup>+</sup>: 175.1117, found: 175.1118.

### 2-((1*E*)-penta-1,3-dien-1-yl)phenyl)methanol (**1q**)

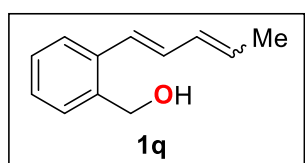

The title compound was prepared according to the general procedure and purified by column chromatography to give colorless oil, 0.8 g, 73% yield, (*EE/EZ* = 1 : 6.1). **<sup>1</sup>H NMR**

(400 MHz, CDCl<sub>3</sub>)  $\delta$  7.57 (d,  $J = 7.2$  Hz, 0.14H), 7.51 (dd,  $J = 8.0$  Hz, 1.2 Hz, 0.86H), 7.15-7.31 (m, 3H), 6.63-7.06 (m, 2H), 6.18-6.28 (m, 1H), 5.57-5.87 (m, 1H), 4.66-4.67 (m, 2H), 2.12 (br, 1H), 1.80-1.86 (m, 3H); <sup>13</sup>C NMR (125 MHz, CDCl<sub>3</sub>)  $\delta$  137.6, 137.5, 136.52, 136.46, 132.2, 131.7, 131.0, 129.9, 128.59, 128.57, 128.3, 128.2, 127.8, 127.6, 127.3, 126.6, 126.2, 125.8, 125.6, 63.53, 63.49, 18.5, 13.8; HRMS (ESI) calcd for C<sub>12</sub>H<sub>14</sub>ONa [M+Na]<sup>+</sup>: 197.0942, found: 197.0953.

**ethyl (2E,4E)-5-(2-(hydroxymethyl)phenyl)penta-2,4-dienoate (1r)**

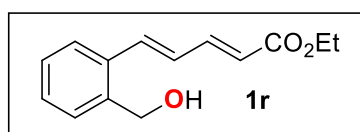

The title compound was prepared according to the general procedure and purified by column chromatography to give colorless oil, 1.2 g, 79% yield.

<sup>1</sup>H NMR (400 MHz, CDCl<sub>3</sub>)  $\delta$  7.57-7.59 (m, 1H), 7.42-7.48 (M, 0.86H), 7.15-7.31 (m, 1H), 7.35-7.38 (m, 1H), 7.22-7.30 (m, 3H), 6.77-6.84 (m, 1H), 5.98 (dd,  $J = 15.6$  Hz, 0.8 Hz, 1H), 4.73 (s, 2H), 4.17-4.23 (m, 2H), 2.50 (s, 1H), 1.32 (t,  $J = 7.2$  Hz, 3H); <sup>13</sup>C NMR (125 MHz, CDCl<sub>3</sub>)  $\delta$  167.2, 144.8, 138.6, 137.1, 134.8, 129.0, 128.8, 128.2, 128.1, 126.1, 121.6, 63.1, 60.5, 14.4; HRMS (ESI) calcd for C<sub>14</sub>H<sub>16</sub>O<sub>3</sub>Na [M+Na]<sup>+</sup>: 255.0997, found: 255.1000.



#### 4. Experimental Characterization Data for Products

##### *Trans-N,N*-dibenzyl-1-(3-vinylisochroman-4-yl)methanamine (3aa)

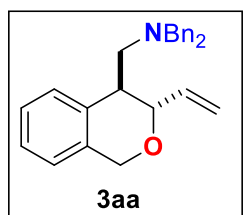

The title compound was prepared according to the general procedure and purified by column chromatography to give colorless oil, 95 mg, 86% yield, > 20:1 dr.  $^1\text{H NMR}$  (400 MHz,  $\text{CDCl}_3$ )  $\delta$  7.12-7.33 (m, 13H), 6.88-6.90 (m, 1H), 5.89-5.97 (m, 1H), 5.14-5.23 (m, 2H), 4.74 (d,  $J = 15.2$  Hz, 1H), 4.65-4.66 (m, 1H), 4.57 (d,  $J = 15.2$  Hz, 1H), 3.71 (d,  $J = 13.6$  Hz, 2H), 3.61 (d,  $J = 13.6$  Hz, 2H), 2.79-2.92 (m, 2H), 2.60 (dd,  $J = 12.4$  Hz, 4.0 Hz, 1H);  $^{13}\text{C NMR}$  (100 MHz,  $\text{CDCl}_3$ )  $\delta$  139.4, 137.0, 134.9, 134.6, 129.4, 129.1, 128.3, 127.0, 126.4, 126.2, 124.0, 117.8, 74.4, 63.4, 59.8, 59.2, 39.8; **HRMS** (ESI) calcd for  $\text{C}_{26}\text{H}_{28}\text{NO}$   $[\text{M}+\text{H}]^+$ : 370.2165, found: 370.2161.

##### *Trans-N,N*-bis(4-methylbenzyl)-1-(3-vinylisochroman-4-yl)methanamine (3ab)

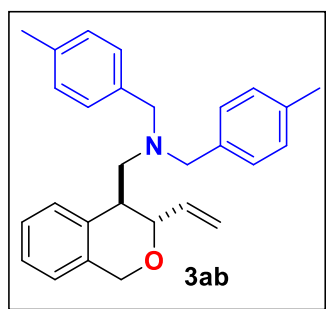

The title compound was prepared according to the general procedure and purified by column chromatography to give colorless oil, 107 mg, 90% yield, > 20:1 dr.  $^1\text{H NMR}$  (400 MHz,  $\text{CDCl}_3$ )  $\delta$  7.09-7.23 (m, 11H), 6.91 (d,  $J = 6.8$  Hz, 1H), 5.90-5.99 (m, 1H), 5.14-5.24 (m, 2H), 4.76 (d,  $J = 15.2$  Hz, 1H), 4.66-4.67 (m, 1H), 4.59 (d,  $J = 15.2$  Hz, 1H), 3.66 (d,  $J = 13.6$  Hz, 2H), 3.56 (d,  $J = 13.6$  Hz, 2H), 2.80-2.90 (m, 2H), 2.58 (dd,  $J = 11.6$  Hz, 3.6 Hz, 1H), 2.32 (s, 6H);  $^{13}\text{C NMR}$  (100 MHz,  $\text{CDCl}_3$ )  $\delta$  137.1, 136.5, 136.3, 135.1, 134.6, 129.5, 129.0, 126.5, 126.1, 124.0, 117.7, 74.5, 63.5, 59.7, 58.7, 39.7, 21.2; **HRMS** (ESI) calcd for  $\text{C}_{28}\text{H}_{32}\text{NO}$   $[\text{M}+\text{H}]^+$ : 398.2478, found: 398.2472.

##### *Trans-N,N*-bis(4-(tert-butyl)benzyl)-1-(3-vinylisochroman-4-yl)methanamine (3ac)

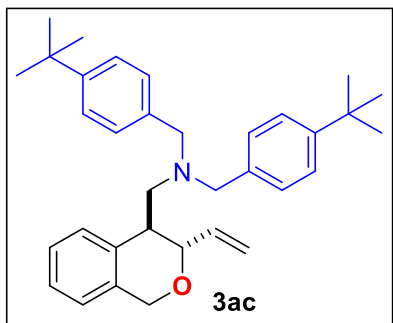

The title compound was prepared according to the general procedure and purified by column chromatography to give colorless oil, 136 mg, 94% yield, > 20:1 dr.  $^1\text{H NMR}$  (400 MHz,  $\text{CDCl}_3$ )  $\delta$  7.24-7.32 (m, 8H), 7.09-7.20 (m, 3H), 6.88-6.90 (m, 1H), 5.87-5.96 (m, 1H), 5.11-5.20 (m, 2H), 4.75 (d,  $J = 15.2$  Hz, 1H), 4.69-4.70 (m, 1H), 4.58 (d,  $J = 15.2$  Hz, 1H), 3.65 (d,  $J = 14.0$  Hz, 2H), 3.61 (d,  $J = 14.0$  Hz, 2H), 2.80-2.91 (m, 2H), 2.61 (dd,  $J = 12.0$  Hz, 4.4 Hz, 1H), 1.30 (s, 18H);  $^{13}\text{C NMR}$  (100 MHz,  $\text{CDCl}_3$ )  $\delta$  149.8, 137.1, 136.4, 135.2, 134.6, 129.5, 128.7, 126.4, 126.1, 125.2, 124.0, 117.7, 74.6, 63.6, 59.9, 58.8, 39.8, 34.6, 31.6; **HRMS** (ESI) calcd for  $\text{C}_{34}\text{H}_{44}\text{NO}$   $[\text{M}+\text{H}]^+$ : 482.3417, found: 482.3408.

***Trans-N,N*-bis(4-methoxybenzyl)-1-(3-vinylisochroman-4-yl)methanamine (3ad)**

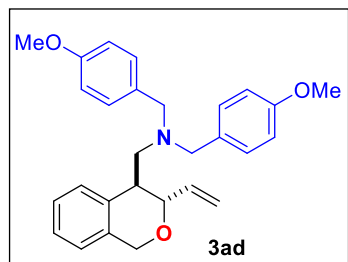

The title compound was prepared according to the general procedure and purified by column chromatography to give colorless oil, 82 mg, 64% yield, > 20:1 dr.  $^1\text{H NMR}$  (400 MHz,  $\text{CDCl}_3$ )  $\delta$  7.21-7.23 (m, 4H), 7.10-7.18 (m, 3H), 6.82-6.91 (m, 5H), 5.90-5.99 (m, 1H), 5.15-5.24 (m, 2H), 4.75 (d,  $J = 15.2$  Hz, 1H), 4.63-4.65 (m, 1H), 4.59 (d,  $J = 15.2$  Hz, 1H), 3.78 (s, 6H), 3.62 (d,  $J = 13.6$  Hz, 2H), 3.53 (d,  $J = 13.6$  Hz, 2H), 2.78-2.88 (m, 2H), 2.57 (dd,  $J = 11.6$  Hz, 4.0 Hz, 1H);  $^{13}\text{C NMR}$  (100 MHz,  $\text{CDCl}_3$ )  $\delta$  158.7, 137.1, 135.1, 134.6, 131.4, 130.1, 129.4, 126.4, 126.1, 124.0, 117.7, 113.7, 74.5, 63.5, 59.6, 58.3, 55.3, 39.7; **HRMS** (ESI) calcd for  $\text{C}_{28}\text{H}_{32}\text{NO}_3$   $[\text{M}+\text{H}]^+$ : 430.2382, found: 430.2385.

***Trans-N,N*-bis(4-fluorobenzyl)-1-(3-vinylisochroman-4-yl)methanamine (3ae)**

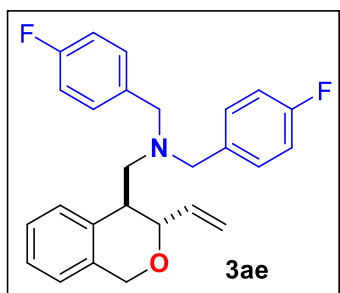

The title compound was prepared according to the general procedure and purified by column chromatography to give colorless oil, 92 mg, 76% yield, > 20:1 dr.  $^1\text{H NMR}$  (400 MHz,  $\text{CDCl}_3$ )  $\delta$  7.23-7.26 (m, 4H), 7.11-7.14 (m, 3H), 6.90-6.99 (m, 5H), 5.88-5.96 (m, 1H), 5.15-5.24 (m, 2H), 4.75 (d,  $J = 15.2$  Hz, 1H), 4.61-4.62 (m, 1H), 4.57 (d,  $J = 15.2$  Hz, 1H), 3.64 (d,  $J = 13.6$  Hz, 2H), 3.55 (d,  $J = 13.6$  Hz, 2H), 2.78-2.88 (m, 2H), 2.57 (dd,  $J = 12.0$  Hz, 4.4 Hz, 1H);  $^{13}\text{C NMR}$  (100 MHz,  $\text{CDCl}_3$ )  $\delta$  163.3 (d,  $J_{\text{C-F}} = 243$  Hz), 136.8, 134.92, 134.88, 134.7 (d,  $J_{\text{C-F}} = 15$  Hz), 130.4 (d,  $J_{\text{C-F}} = 8$  Hz), 129.4, 126.5, 126.3, 124.1, 118.0, 115.3 (d,  $J_{\text{C-F}} = 21$  Hz), 74.2, 63.3, 59.6, 58.4, 39.7;  $^{19}\text{F NMR}$  (376 MHz,  $\text{CDCl}_3$ )  $\delta$  -115.7; **HRMS** (ESI) calcd for  $\text{C}_{26}\text{H}_{26}\text{F}_2\text{NO}$   $[\text{M}+\text{H}]^+$ : 406.1977, found: 406.1968.

***Trans-N,N-bis(3-fluorobenzyl)-1-(3-vinylisochroman-4-yl)methanamine (3af)***

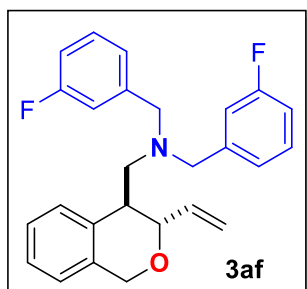

The title compound was prepared according to the general procedure and purified by column chromatography to give colorless oil, 89 mg, 73% yield, > 20:1 dr.  $^1\text{H NMR}$  (400 MHz,  $\text{CDCl}_3$ )  $\delta$  7.22-7.27 (m, 2H), 7.15-7.18 (m, 3H), 7.01-7.08 (m, 4H), 6.91 (s, 3H), 5.88-6.00 (m, 1H), 5.16-5.25 (m, 2H), 4.75 (d,  $J = 15.2$  Hz, 1H), 4.62-4.63 (m, 1H), 4.58 (d,  $J = 15.2$  Hz, 1H), 3.68 (d,  $J = 14.0$  Hz, 2H), 3.61 (d,  $J = 14.0$  Hz, 2H), 2.79-2.91 (m, 2H), 2.61 (dd,  $J = 12.4$  Hz, 4.8 Hz, 1H);  $^{13}\text{C NMR}$  (100 MHz,  $\text{CDCl}_3$ )  $\delta$  164.3 (d,  $J_{\text{C-F}} = 244$  Hz), 141.9 (d,  $J_{\text{C-F}} = 7$  Hz), 136.7, 134.6, 134.5, 129.9 (d,  $J_{\text{C-F}} = 8$  Hz), 129.4, 126.5, 126.4, 124.5 (d,  $J_{\text{C-F}} = 3$  Hz), 124.1, 118.2, 115.8 (d,  $J_{\text{C-F}} = 21$  Hz), 114.2 (d,  $J_{\text{C-F}} = 21$  Hz), 74.3, 63.3, 59.9, 58.8, 39.7;  $^{19}\text{F NMR}$  (376 MHz,  $\text{CDCl}_3$ )  $\delta$  -117.8; **HRMS** (ESI) calcd for  $\text{C}_{26}\text{H}_{26}\text{F}_2\text{NO}$   $[\text{M}+\text{H}]^+$ : 406.1977, found: 406.1976.

***Trans-N,N-bis(2-fluorobenzyl)-1-(3-vinylisochroman-4-yl)methanamine (3ag)***

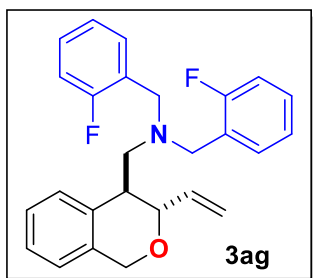

The title compound was prepared according to the general procedure and purified by column chromatography to give colorless oil, 92 mg, 76% yield, > 20:1 dr. **<sup>1</sup>H NMR** (400 MHz, CDCl<sub>3</sub>) δ 7.38 (t, *J* = 7.6 Hz, 2H), 6.97-7.20 (m, 9H), 6.90-6.91 (m, 1H), 5.87-5.96 (m, 1H), 5.13-5.23 (m, 2H), 4.75 (d, *J* = 15.6 Hz, 1H), 4.64-4.65 (m, 1H), 4.57 (d, *J* = 15.6 Hz, 1H), 3.80 (d, *J* = 14.0 Hz, 2H), 3.72 (d, *J* = 14.0 Hz, 2H), 2.80-2.92 (m, 2H), 2.63 (dd, *J* = 12.0 Hz, 4.0 Hz, 1H); **<sup>13</sup>C NMR** (100 MHz, CDCl<sub>3</sub>) δ 162.7 (d, *J*<sub>C-F</sub> = 245 Hz), 136.9, 134.8 (d, *J*<sub>C-F</sub> = 21 Hz), 131.4 (d, *J*<sub>C-F</sub> = 5 Hz), 129.5, 128.76, 128.68, 126.5, 126.2, 126.0 (d, *J*<sub>C-F</sub> = 14 Hz), 124.0, 123.98, 117.9, 115.4 (d, *J*<sub>C-F</sub> = 22 Hz), 74.2, 63.3, 59.6, 52.0 (d, *J*<sub>C-F</sub> = 1 Hz), 39.8; **<sup>19</sup>F NMR** (376 MHz, CDCl<sub>3</sub>) δ -117.8; **HRMS** (ESI) calcd for C<sub>26</sub>H<sub>26</sub>F<sub>2</sub>NO [M+H]<sup>+</sup>: 406.1977, found: 406.1968.

***Trans*-N,N-bis(4-chlorobenzyl)-1-(3-vinylisochroman-4-yl)methanamine (3ah)**

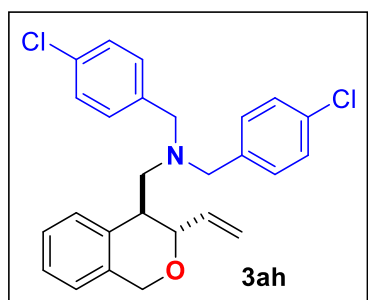

The title compound was prepared according to the general procedure and purified by column chromatography to give colorless oil, 108 mg, 82% yield, > 20:1 dr. **<sup>1</sup>H NMR** (400 MHz, CDCl<sub>3</sub>) δ 7.11-7.26 (m, 11H), 6.90-6.92 (m, 1H), 5.88-5.96 (m, 1H), 5.16-5.24 (m, 2H), 4.75 (d, *J* = 15.6 Hz, 1H), 4.61-4.63 (m, 1H), 4.58 (d, *J* = 15.2 Hz, 1H), 3.64 (d, *J* = 14.0 Hz, 2H), 3.55 (d, *J* = 14.0 Hz, 2H), 2.79-2.88 (m, 2H), 2.57 (dd, *J* = 11.2 Hz, 3.6 Hz, 1H); **<sup>13</sup>C NMR** (100 MHz, CDCl<sub>3</sub>) δ 137.6, 136.7, 134.54, 134.52, 132.8, 130.2, 129.4, 128.5, 126.44, 126.35, 124.1, 118.2, 74.2, 63.2, 59.7, 58.4, 39.6; **HRMS** (ESI) calcd for C<sub>26</sub>H<sub>26</sub>Cl<sub>2</sub>NO [M+H]<sup>+</sup>: 438.1386, found: 438.1379.

***Trans*-N,N-bis(4-bromobenzyl)-1-(3-vinylisochroman-4-yl)methanamine (3ai)**

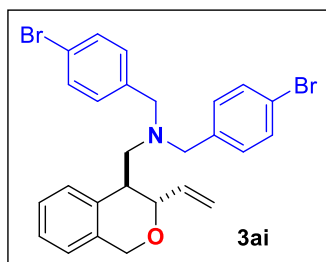

The title compound was prepared according to the general procedure and purified by column chromatography to give colorless oil, 95 mg, 60% yield, > 20:1 dr.  $^1\text{H NMR}$  (400 MHz,  $\text{CDCl}_3$ )  $\delta$  7.39-7.42 (m, 4H), 7.14-7.16 (m, 7H), 6.90-6.93 (m, 1H), 5.88-5.97 (m, 1H), 5.16-5.25 (m, 2H), 4.76 (d,  $J = 15.2$  Hz, 1H), 4.61-4.63 (m, 1H), 4.59 (d,  $J = 15.6$  Hz, 1H), 3.63 (d,  $J = 14.0$  Hz, 2H), 3.54 (d,  $J = 14.0$  Hz, 2H), 2.79-2.87 (m, 2H), 2.58 (dd,  $J = 10.4$  Hz, 3.2 Hz, 1H);  $^{13}\text{C NMR}$  (100 MHz,  $\text{CDCl}_3$ )  $\delta$  138.1, 136.7, 134.5, 131.5, 130.6, 129.4, 126.5, 126.4, 124.1, 120.9, 118.2, 74.2, 63.2, 59.7, 58.4, 39.6; **HRMS** (ESI) calcd for  $\text{C}_{26}\text{H}_{26}\text{Br}_2\text{NO}$   $[\text{M}+\text{H}]^+$ : 526.0376, found: 526.0373.

***Trans-N,N-bis(4-(trifluoromethyl)benzyl)-1-(3-vinylisochroman-4-yl)methanamine (3aj)***

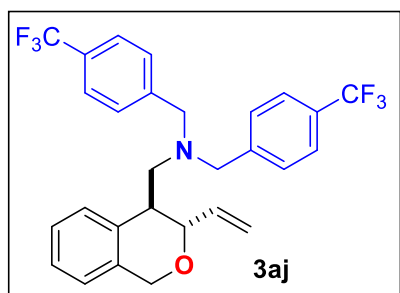

The title compound was prepared according to the general procedure and purified by column chromatography to give colorless oil, 106 mg, 70% yield, > 20:1 dr.  $^1\text{H NMR}$  (400 MHz,  $\text{CDCl}_3$ )  $\delta$  7.53-7.55 (m, 4H), 7.39-7.41 (m, 4H), 7.16-7.17 (m, 3H), 6.92-6.93 (m, 1H), 5.88-5.96 (m, 1H), 5.16-5.24 (m, 2H), 4.76 (d,  $J = 15.6$  Hz, 1H), 4.66-4.67 (m, 1H), 4.57 (d,  $J = 15.6$  Hz, 1H), 3.75 (d,  $J = 14.0$  Hz, 2H), 3.69 (d,  $J = 14.4$  Hz, 2H), 2.83-2.92 (m, 2H), 2.65 (dd,  $J = 12.0$  Hz, 4.4 Hz, 1H);  $^{13}\text{C NMR}$  (100 MHz,  $\text{CDCl}_3$ )  $\delta$  143.2, 136.5, 134.6, 134.4, 130.0, 129.7 (d,  $J_{\text{C-F}} = 32$  Hz), 129.5, 129.0, 128.4 (q,  $J_{\text{C-F}} = 270$  Hz), 126.5 (d,  $J_{\text{C-F}} = 4$  Hz), 125.5 (q,  $J_{\text{C-F}} = 4$  Hz), 124.2, 118.4, 74.2, 63.2, 60.0, 58.9, 39.7;  $^{19}\text{F NMR}$  (376 MHz,  $\text{CDCl}_3$ )  $\delta$  -62.4; **HRMS** (ESI) calcd for  $\text{C}_{28}\text{H}_{26}\text{F}_6\text{NO}$   $[\text{M}+\text{H}]^+$ : 506.1913, found: 506.1895.

***Trans-4-((3-vinylisochroman-4-yl)methyl)morpholine (3ak)***

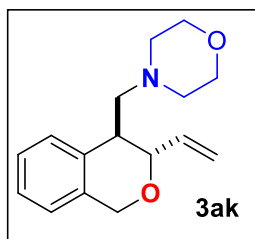

The title compound was prepared according to the general procedure and purified by column chromatography to give colorless oil, 49 mg, 63% yield, > 20:1 dr. **<sup>1</sup>H NMR** (400 MHz, CDCl<sub>3</sub>) δ 7.26-7.30 (m, 1H), 7.14-7.21 (m, 2H), 6.96-6.98 (m, 1H), 5.95-6.03 (m, 1H), 5.33 (dt, *J* = 18.8 Hz, 1.2 Hz, 1H), 5.25 (dt, *J* = 10.8 Hz, 1.6 Hz, 1H), 4.83 (d, *J* = 15.2 Hz, 1H), 4.73 (d, *J* = 15.6 Hz, 1H), 4.59-4.61 (m, 1H), 3.67-3.76 (m, 4H), 2.84-2.89 (m, 1H), 2.75 (dd, *J* = 12.4 Hz, 9.2 Hz, 1H), 2.38-2.55 (m, 5H); **<sup>13</sup>C NMR** (100 MHz, CDCl<sub>3</sub>) δ 136.9, 135.0, 134.6, 129.2, 126.7, 126.3, 124.1, 118.3, 74.6, 67.2, 63.9, 63.6, 54.1, 38.2; **HRMS** (ESI) calcd for C<sub>16</sub>H<sub>22</sub>NO<sub>2</sub> [M+H]<sup>+</sup>: 260.1645, found: 260.1639.

***Trans*-*N*-propyl-*N*-((3-vinylisochroman-4-yl)methyl)propan-1-amine (3al)**

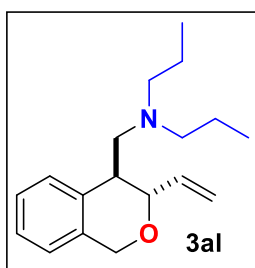

The title compound was prepared according to the general procedure and purified by column chromatography to give colorless oil, 59 mg, 72% yield, > 20:1 dr. **<sup>1</sup>H NMR** (400 MHz, CDCl<sub>3</sub>) δ 7.23-7.25 (m, 1H), 7.12-7.19 (m, 2H), 6.94-6.96 (m, 1H), 5.95-6.04 (m, 1H), 5.30 (dt, *J* = 17.6 Hz, 1.6 Hz, 1H), 5.21 (dt, *J* = 10.8 Hz, 1.6 Hz, 1H), 4.83 (d, *J* = 15.2 Hz, 1H), 4.67-4.71 (m, 2H), 2.73-2.81 (m, 2H), 2.34-2.50 (m, 5H), 1.42-1.51 (m, 4H), 0.86 (t, *J* = 7.2 Hz, 6H); **<sup>13</sup>C NMR** (100 MHz, CDCl<sub>3</sub>) δ 137.0, 135.2, 134.6, 129.5, 126.5, 126.1, 124.0, 118.0, 73.9, 63.2, 60.4, 56.9, 40.0, 20.6, 12.1; **HRMS** (ESI) calcd for C<sub>18</sub>H<sub>28</sub>NO [M+H]<sup>+</sup>: 274.2165, found: 274.2159.

***Trans*-1-(7-methyl-3-vinylisochroman-4-yl)-*N,N*-bis(4-methylbenzyl)methanamine (3bb)**

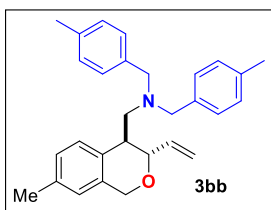

The title compound was prepared according to the general procedure and purified by column chromatography to give colorless oil, 106 mg, 86% yield, > 20:1 dr. **<sup>1</sup>H NMR** (400 MHz, CDCl<sub>3</sub>) δ 7.17-7.21 (m, 4H), 7.04-7.10 (m, 5H), 6.94-6.96 (m,

1H), 6.71 (s, 1H), 5.90-5.98 (m, 1H), 5.13-5.23 (m, 2H), 4.68-4.71 (m, 2H), 4.55 (d,  $J = 15.2$  Hz, 1H), 3.66 (d,  $J = 13.6$  Hz, 2H), 3.53 (d,  $J = 13.6$  Hz, 2H), 2.76-2.89 (m, 2H), 2.54 (dd,  $J = 12.4$  Hz, 4.4 Hz, 1H), 2.30 (s, 6H), 2.26 (s, 3H);  $^{13}\text{C}$  NMR (100 MHz,  $\text{CDCl}_3$ )  $\delta$  137.2, 136.4, 136.3, 135.6, 134.4, 132.0, 129.3, 129.01, 128.97, 127.3, 124.5, 117.6, 74.5, 63.5, 59.7, 58.6, 39.3, 21.22, 21.19; HRMS (ESI) calcd for  $\text{C}_{29}\text{H}_{34}\text{NO}$   $[\text{M}+\text{H}]^+$ : 412.2635, found: 412.2621.

***Trans*-1-(7-methoxy-3-vinylisochroman-4-yl)-*N,N*-bis(4-methylbenzyl)methanamine (3cb)**

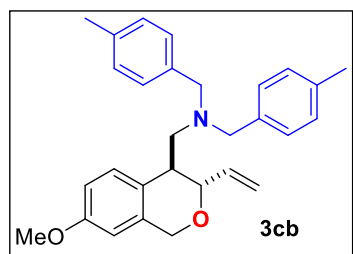

The title compound was prepared according to the general procedure and purified by column chromatography to give colorless oil, 105 mg, 82% yield, > 20:1 dr.  $^1\text{H}$  NMR (400 MHz,  $\text{CDCl}_3$ )  $\delta$  7.19-7.21 (m, 4H), 7.09-7.10 (m, 5H), 6.73 (dd,  $J = 8.4$  Hz, 2.8 Hz, 1H), 6.44 (d,  $J = 2.4$

Hz, 1H), 5.89-5.98 (m, 1H), 5.14-5.24 (m, 2H), 4.72 (d,  $J = 15.2$  Hz, 1H), 4.63-4.65 (m, 1H), 4.56 (d,  $J = 15.2$  Hz, 1H), 3.73 (s, 3H), 3.65 (d,  $J = 13.6$  Hz, 2H), 3.55 (d,  $J = 14.0$  Hz, 2H), 2.86 (dd,  $J = 12.4$  Hz, 9.2 Hz, 1H), 2.74-2.78 (m, 1H), 2.54 (dd,  $J = 12.0$  Hz, 4.4 Hz, 1H), 2.31 (s, 6H);  $^{13}\text{C}$  NMR (100 MHz,  $\text{CDCl}_3$ )  $\delta$  157.9, 137.1, 136.4, 136.3, 135.7, 130.4, 128.99, 128.98, 127.2, 117.7, 113.0, 108.5, 74.7, 63.6, 59.7, 58.6, 55.3, 38.9, 21.2; HRMS (ESI) calcd for  $\text{C}_{29}\text{H}_{34}\text{NO}_2$   $[\text{M}+\text{H}]^+$ : 428.2584, found: 428.2575.

***Trans*-1-(6-methoxy-3-vinylisochroman-4-yl)-*N,N*-bis(4-methylbenzyl)methanamine (3db)**

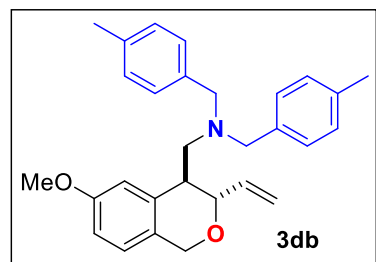

The title compound was prepared according to the general procedure and purified by column chromatography to give colorless oil, 94 mg, 73% yield, > 20:1 dr.  $^1\text{H}$  NMR (400 MHz,  $\text{CDCl}_3$ )  $\delta$  7.20-7.22 (m, 4H), 7.09-7.10 (m, 4H), 6.82 (d,  $J = 8.0$  Hz,

1H), 6.67-6.72 (m, 2H), 5.90-5.98 (m, 1H), 5.13-5.24 (m, 2H), 4.70 (d,  $J = 14.4$  Hz,

1H), 4.61-4.63 (m, 1H), 4.53 (d,  $J = 14.8$  Hz, 1H), 3.75 (s, 3H), 3.65 (d,  $J = 13.6$  Hz, 2H), 3.57 (d,  $J = 14.0$  Hz, 2H), 2.90 (dd,  $J = 12.8$  Hz, 9.2 Hz, 1H), 2.75-2.79 (m, 1H), 2.60 (dd,  $J = 12.4$  Hz, 4.8 Hz, 1H), 2.31 (s, 6H);  $^{13}\text{C}$  NMR (100 MHz,  $\text{CDCl}_3$ )  $\delta$  158.1, 137.2, 136.5, 136.4, 136.2, 129.01, 128.99, 126.7, 125.0, 117.7, 114.2, 112.4, 74.4, 63.3, 59.6, 58.7, 55.3, 40.1, 21.2; HRMS (ESI) calcd for  $\text{C}_{29}\text{H}_{34}\text{NO}_2$   $[\text{M}+\text{H}]^+$ : 428.2590, found: 428.2590.

***Trans*-1-(6-((*tert*-butyldimethylsilyl)oxy)-3-vinylisochroman-4-yl)-*N,N*-bis(4-methylbenzyl)methanamine (3eb)**

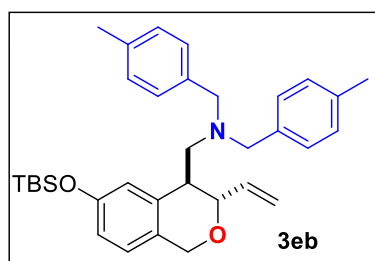

The title compound was prepared according to the general procedure and purified by column chromatography to give colorless oil, 114 mg, 72% yield, > 20:1 dr.  $^1\text{H}$  NMR (400 MHz,  $\text{CDCl}_3$ )  $\delta$  7.21-7.23 (m, 4H), 7.09-7.11 (m, 4H), 6.77 (d,  $J = 8.4$  Hz, 1H), 6.68 (d,  $J = 2.4$  Hz, 1H), 6.63 (dd,  $J = 8.4$  Hz, 2.4 Hz, 1H), 5.90-5.99 (m, 1H), 5.14-5.23 (m, 2H), 4.69 (d,  $J = 14.8$  Hz, 1H), 4.60-4.62 (m, 1H), 4.54 (d,  $J = 14.8$  Hz, 1H), 3.65 (d,  $J = 13.6$  Hz, 2H), 3.57 (d,  $J = 12.4$  Hz, 2H), 2.87 (dd,  $J = 12.4$  Hz, 9.2 Hz, 1H), 2.71-2.75 (m, 1H), 2.56 (dd,  $J = 12.8$  Hz, 4.8 Hz, 1H), 2.32 (m, 6H), 0.99 (s, 9H), 0.18 (s, 6H);  $^{13}\text{C}$  NMR (100 MHz,  $\text{CDCl}_3$ )  $\delta$  154.1, 137.3, 136.5, 136.4, 136.2, 129.1, 129.0, 127.4, 125.0, 120.6, 118.2, 117.6, 74.5, 63.6, 59.5, 58.7, 39.9, 25.9, 21.2, 18.4, -4.2, -4.3; HRMS (ESI) calcd for  $\text{C}_{34}\text{H}_{46}\text{NO}_2\text{Si}$   $[\text{M}+\text{H}]^+$ : 528.3298, found: 528.3299.

***Trans*-1-(6,7-dimethoxy-3-vinylisochroman-4-yl)-*N,N*-bis(4-methylbenzyl)methanamine (3fb)**

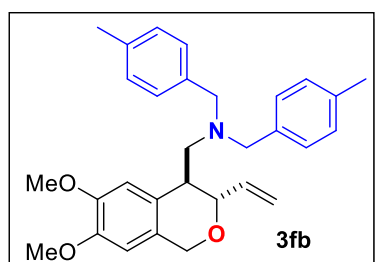

The title compound was prepared according to the general procedure and purified by column chromatography to give colorless oil, 107 mg, 78% yield, > 20:1 dr.  $^1\text{H}$  NMR (400 MHz,  $\text{CDCl}_3$ )  $\delta$  7.21-7.23 (m, 4H), 7.09-7.11 (m, 4H), 6.67 (s, 1H), 6.39 (s,



1H), 5.90-5.98 (m, 1H), 5.16-5.27 (m, 2H), 4.69 (d,  $J = 14.8$  Hz, 1H), 4.59-4.61 (m, 1H), 4.54 (d,  $J = 14.4$  Hz, 1H), 3.83 (s, 3H), 3.80 (s, 3H), 3.57-3.65 (m, 4H), 2.87 (dd,  $J = 12.8$  Hz, 8.8 Hz, 1H), 2.70-2.74 (m, 1H), 2.61 (dd,  $J = 12.8$  Hz, 5.2 Hz, 1H), 2.31 (s, 6H);  $^{13}\text{C}$  NMR (100 MHz,  $\text{CDCl}_3$ )  $\delta$  147.7, 147.6, 137.1, 136.5, 136.2, 128.99, 128.95, 127.0, 126.4, 117.7, 112.1, 106.7, 74.7, 63.3, 59.5, 58.7, 56.0, 55.9, 39.4, 21.2; HRMS (ESI) calcd for  $\text{C}_{30}\text{H}_{36}\text{NO}_3$   $[\text{M}+\text{H}]^+$ : 458.2690, found: 458.2670.

***Trans*-1-(7-fluoro-3-vinylisochroman-4-yl)-*N,N*-bis(4-methylbenzyl)methanamine (3gb)**

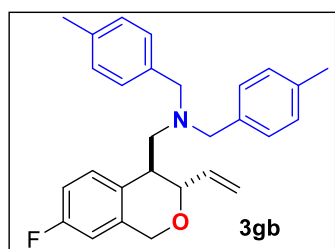

The title compound was prepared according to the general procedure and purified by column chromatography to give colorless oil, 112 mg, 90% yield, > 20:1 dr.  $^1\text{H}$  NMR (400 MHz,  $\text{CDCl}_3$ )  $\delta$  7.14-7.20 (m, 5H), 7.09-7.12 (m, 4H), 6.85 (t,  $J = 8.0$  Hz, 1H), 6.61 (d,  $J = 8.8$  Hz, 1H), 5.86-5.94 (m,

1H), 5.15-5.22 (m, 2H), 4.70 (d,  $J = 15.6$  Hz, 1H), 4.61-4.62 (m, 1H), 4.54 (d,  $J = 15.6$  Hz, 1H), 3.54-3.62 (m, 4H), 2.75-2.84 (m, 2H), 2.47-2.56 (m, 1H), 2.31 (s, 6H);  $^{13}\text{C}$  NMR (100 MHz,  $\text{CDCl}_3$ )  $\delta$  162.4 (d,  $J_{\text{C-F}} = 243$  Hz), 136.7, 136.55, 136.47, 136.4, 136.2, 131.1 (d,  $J_{\text{C-F}} = 8$  Hz), 130.7 (d,  $J_{\text{C-F}} = 3$  Hz), 129.0 (d,  $J_{\text{C-F}} = 5$  Hz), 118.0, 113.7 (d,  $J_{\text{C-F}} = 21$  Hz), 110.6 (d,  $J_{\text{C-F}} = 21$  Hz), 74.5, 63.3 (d,  $J_{\text{C-F}} = 2$  Hz), 59.6, 58.8, 39.0, 21.2;  $^{19}\text{F}$  NMR (376 MHz,  $\text{CDCl}_3$ )  $\delta$  -116.4; HRMS (ESI) calcd for  $\text{C}_{28}\text{H}_{31}\text{FNO}$   $[\text{M}+\text{H}]^+$ : 416.2384, found: 416.2373.

***Trans*-1-((6-fluoro-3-vinylisochroman-4-yl)-*N,N*-bis(4-methylbenzyl)methanamine (3hb)**

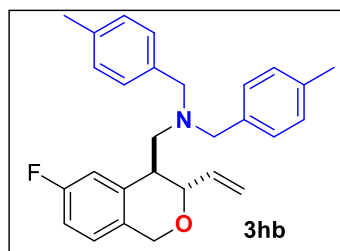

The title compound was prepared according to the general procedure and purified by column chromatography to give colorless oil, 85 mg, 68% yield, > 20:1 dr.  $^1\text{H}$  NMR (400 MHz,  $\text{CDCl}_3$ )  $\delta$  7.10-7.21 (m, 8H), 6.99 (dd,  $J = 9.6$  Hz, 1.6 Hz, 1H), 6.79-6.87 (m, 2H), 5.87-5.96 (m, 1H),

5.17-5.23 (m, 2H), 4.70 (d,  $J = 9.6$  Hz, 1H), 4.52-4.56 (m, 2H), 3.54-3.62 (m, 4H), 2.76-2.83 (m, 2H), 2.53-2.60 (m, 1H), 2.32 (s, 6H);  $^{13}\text{C}$  NMR (100 MHz,  $\text{CDCl}_3$ )  $\delta$  162.6 (d,  $J_{\text{C-F}} = 242$  Hz), 137.6 (d,  $J_{\text{C-F}} = 7$  Hz), 136.8, 136.6, 136.1, 130.1 (d,  $J_{\text{C-F}} = 3$  Hz), 129.1, 129.0, 125.5 (d,  $J_{\text{C-F}} = 8$  Hz), 118.1, 115.9 (d,  $J_{\text{C-F}} = 21$  Hz), 113.4 (d,  $J_{\text{C-F}} = 22$  Hz), 74.6, 63.6, 59.2, 58.8, 39.7, 21.2;  $^{19}\text{F}$  NMR (376 MHz,  $\text{CDCl}_3$ )  $\delta$  -116.3; HRMS (ESI) calcd for  $\text{C}_{28}\text{H}_{31}\text{FNO}$   $[\text{M}+\text{H}]^+$ : 416.2384, found: 416.2377.

***Trans*-1-(5-fluoro-3-vinylisochroman-4-yl)-*N,N*-bis(4-methylbenzyl)methanamine (3ib)**

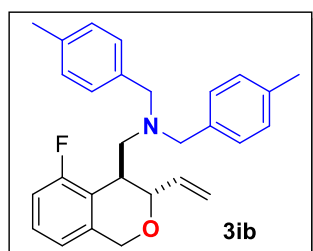

The title compound was prepared according to the general procedure and purified by column chromatography to give colorless oil, 100 mg, 80% yield, > 20:1 dr.  $^1\text{H}$  NMR (400 MHz,  $\text{CDCl}_3$ )  $\delta$  7.20-7.23 (m, 4H), 7.06-7.11 (m, 5H), 6.88 (t,  $J = 9.2$  Hz, 1H), 6.71 (d,  $J = 7.6$  Hz, 1H), 5.86-5.95 (m, 1H), 5.14-5.20 (m, 2H), 4.88-4.90 (m, 1H), 4.72 (d,  $J = 15.6$  Hz, 1H), 4.55 (d,  $J = 15.6$  Hz, 1H), 3.81 (d,  $J = 14.0$  Hz, 2H), 3.47 (d,  $J = 14.0$  Hz, 2H), 3.12 (dd,  $J = 10.8$  Hz, 2.8 Hz, 1H), 2.86-2.92 (m, 1H), 2.56 (dd,  $J = 12.4$  Hz, 2.4 Hz, 1H), 2.32 (s, 6H);  $^{13}\text{C}$  NMR (100 MHz,  $\text{CDCl}_3$ )  $\delta$  162.3 (d,  $J_{\text{C-F}} = 244$  Hz), 137.2 (d,  $J_{\text{C-F}} = 6$  Hz), 136.5, 136.4 (d,  $J_{\text{C-F}} = 1$  Hz), 128.99, 128.95, 127.3 (d,  $J_{\text{C-F}} = 9$  Hz), 122.4 (d,  $J_{\text{C-F}} = 18$  Hz), 119.7 (d,  $J_{\text{C-F}} = 3$  Hz), 118.0, 113.1, 112.9, 72.8, 61.9 (d,  $J_{\text{C-F}} = 2$  Hz), 58.5, 57.6, 33.8, 21.3;  $^{19}\text{F}$  NMR (376 MHz,  $\text{CDCl}_3$ )  $\delta$  -120.7; HRMS (ESI) calcd for  $\text{C}_{28}\text{H}_{31}\text{FNO}$   $[\text{M}+\text{H}]^+$ : 416.2384, found: 416.2381.

***Trans*-1-(7-chloro-3-vinylisochroman-4-yl)-*N,N*-bis(4-methylbenzyl)methanamine (3jb)**

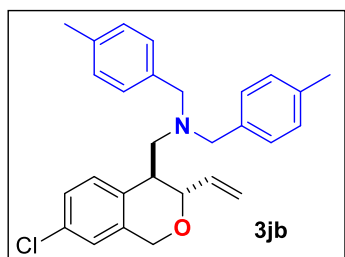

The title compound was prepared according to the general procedure and purified by column chromatography to give colorless oil, 106 mg, 82% yield, > 20:1 dr.  $^1\text{H}$  NMR (400 MHz,  $\text{CDCl}_3$ )  $\delta$  7.09-7.12 (m, 4H), 7.00-7.05 (m, 6H),

6.80 (s, 1H), 5.76-5.85 (m, 1H), 5.07-5.13 (m, 2H), 4.60 (d,  $J = 15.6$  Hz, 1H), 4.51-4.53 (m, 1H), 4.44 (d,  $J = 15.6$  Hz, 1H), 3.46-3.53 (m, 4H), 2.65-2.75 (m, 2H), 2.46 (dd,  $J = 11.6$  Hz, 4.4 Hz, 1H), 2.23 (s, 6H);  $^{13}\text{C}$  NMR (100 MHz,  $\text{CDCl}_3$ )  $\delta$  136.63, 136.56, 136.3, 136.1, 133.7, 131.8, 130.9, 129.02, 128.98, 126.6, 124.0, 118.1, 74.4, 63.1, 59.4, 58.8, 39.1, 21.2; HRMS (ESI) calcd for  $\text{C}_{28}\text{H}_{31}\text{ClNO}$   $[\text{M}+\text{H}]^+$ : 432.2089, found: 432.2084.

***Trans-N,N*-bis(4-methylbenzyl)-1-(6-(trifluoromethyl)-3-vinylisochroman-4-yl)methanamine (3kb)**

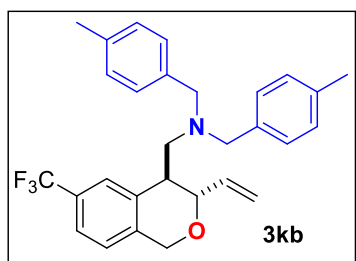

The title compound was prepared according to the general procedure and purified by column chromatography to give colorless oil, 77 mg, 55% yield, > 20:1 dr.  $^1\text{H}$  NMR (400 MHz,  $\text{CDCl}_3$ )  $\delta$  7.58 (s, 1H), 7.38 (d,  $J = 8.0$  Hz, 1H), 7.20 (d,  $J = 8.0$  Hz, 4H), 7.10 (d,  $J = 8.0$  Hz, 4H), 7.00 (d,  $J = 8.0$  Hz, 1H), 5.85-5.93 (m, 1H), 5.18-5.24 (m, 2H), 4.76 (d,  $J = 15.6$  Hz, 1H), 4.54-4.56 (m, 2H), 3.68 (d,  $J = 13.6$  Hz, 2H), 3.55 (d,  $J = 13.6$  Hz, 2H), 2.76-2.87 (m, 2H), 2.57-2.61 (m, 1H), 2.31 (s, 6H);  $^{13}\text{C}$  NMR (100 MHz,  $\text{CDCl}_3$ )  $\delta$  138.4, 136.6, 136.5, 136.1, 136.0, 129.1, 129.0, 128.9 (d,  $J_{\text{C-F}} = 32$  Hz), 128.5 (q,  $J_{\text{C-F}} = 270$  Hz), 126.8 (q,  $J_{\text{C-F}} = 4$  Hz), 124.5, 122.9 (q,  $J_{\text{C-F}} = 4$  Hz), 118.4, 74.8, 63.5, 59.3, 59.0, 39.4, 21.2;  $^{19}\text{F}$  NMR (376 MHz,  $\text{CDCl}_3$ )  $\delta$  -62.2; HRMS (ESI) calcd for  $\text{C}_{29}\text{H}_{31}\text{F}_3\text{NO}$   $[\text{M}+\text{H}]^+$ : 466.2352, found: 466.2345.

***Trans-N,N*-bis(4-methylbenzyl)-1-(3-vinyl-3,4-dihydro-1H-benzo[h]isochromen-4-yl)methanamine (3lb)**

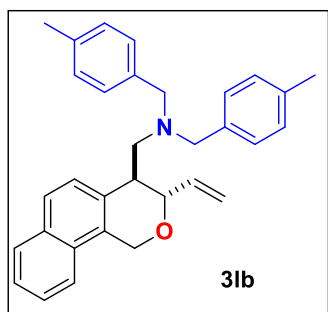

The title compound was prepared according to the general procedure and purified by column chromatography to give colorless oil, 70 mg, 52% yield, > 20:1 dr.  $^1\text{H}$  NMR (400 MHz,  $\text{CDCl}_3$ )  $\delta$  7.77-7.79 (m, 1H), 7.59-7.65 (m, 2H), 7.40-7.46 (m, 2H), 7.21-7.24 (m, 5H), 7.09 (d,  $J = 7.6$  Hz,

4H), 5.92-6.00 (m, 1H), 5.02-5.27 (m, 4H), 4.79-4.81 (m, 1H), 3.71 (d,  $J = 13.6$  Hz, 2H), 3.59 (d,  $J = 13.6$  Hz, 2H), 2.93-2.99 (m, 1H), 2.87-2.89 (m, 1H), 2.67 (dd,  $J = 12.4$  Hz, 4.4 Hz, 1H), 2.30 (s, 6H);  $^{13}\text{C}$  NMR (100 MHz,  $\text{CDCl}_3$ )  $\delta$  136.8, 136.5, 136.3, 132.2, 132.1, 129.2, 129.1, 129.0, 128.7, 127.9, 126.6, 126.2, 125.4, 121.7, 118.0, 73.7, 61.3, 59.4, 58.8, 40.4, 21.2; **HRMS** (ESI) calcd for  $\text{C}_{32}\text{H}_{34}\text{NO}$   $[\text{M}+\text{H}]^+$ : 448.2635, found: 448.2625.

***Trans*-*N,N*-bis(4-methylbenzyl)-1-(1-phenyl-3-vinylisochroman-4-yl)methanamine (3mb)**

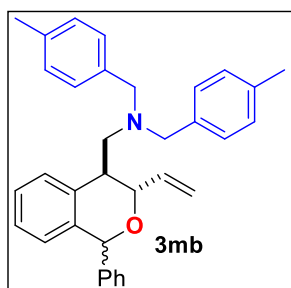

The title compound was prepared according to the general procedure and purified by column chromatography to give colorless oil, 116 mg, 85% yield, 3:1 dr.

**3mb-1:**  $^1\text{H}$  NMR (400 MHz,  $\text{CDCl}_3$ )  $\delta$  7.26-7.37 (m, 3H), 7.22-7.25 (m, 2H), 7.15-7.20 (m, 3H), 7.12 (d,  $J = 7.6$  Hz, 4H), 7.05 (d,  $J = 7.6$  Hz, 4H), 6.84 (d,  $J = 7.6$  Hz, 1H), 5.84-5.92 (m, 1H), 5.76 (s, 1H), 5.28 (d,  $J = 17.2$  Hz, 1H), 5.11 (d,  $J = 10.8$  Hz, 1H), 4.49 (s, 1H), 3.71 (d,  $J = 13.6$  Hz, 2H), 3.46 (d,  $J = 14.0$  Hz, 2H), 3.01-3.03 (m, 1H), 2.82 (dd,  $J = 12.8$  Hz, 5.6 Hz, 1H), 2.73 (dd,  $J = 12.8$  Hz, 8.0 Hz, 1H), 2.31 (s, 6H);  $^{13}\text{C}$  NMR (100 MHz,  $\text{CDCl}_3$ )  $\delta$  142.8, 138.3, 136.7, 136.30, 136.27, 135.1, 129.6, 128.9, 128.6, 128.3, 127.9, 127.0, 126.3, 126.0, 115.9, 77.1, 72.5, 58.5, 55.3, 40.5, 21.2; **HRMS** (ESI) calcd for  $\text{C}_{34}\text{H}_{36}\text{NO}$   $[\text{M}+\text{H}]^+$ : 474.2797, found: 474.2796;

**3mb-2:**  $^1\text{H}$  NMR (400 MHz,  $\text{CDCl}_3$ )  $\delta$  7.15-7.30 (m, 9H), 7.07-7.09 (m, 4H), 7.01-7.05 (m, 1H), 6.94-6.95 (m, 2H), 6.66 (d,  $J = 7.6$  Hz, 1H), 6.03-6.12 (m, 1H), 5.62 (s, 1H), 5.20-5.28 (m, 2H), 4.98 (d,  $J = 5.6$  Hz, 1H), 3.76 (d,  $J = 13.6$  Hz, 2H), 3.58 (d,  $J = 13.6$  Hz, 2H), 3.05 (dd,  $J = 12.0$  Hz, 9.6 Hz, 1H), 2.95 (dd,  $J = 9.2$  Hz, 5.2 Hz, 1H), 2.63 (dd,  $J = 12.4$  Hz, 5.6 Hz, 1H), 2.30 (s, 6H);  $^{13}\text{C}$  NMR (100 MHz,  $\text{CDCl}_3$ )  $\delta$  142.2, 137.1, 136.8, 136.5, 136.4, 134.8, 129.8, 129.1, 128.9, 128.8, 128.4, 127.9, 126.4, 126.4, 126.3, 118.6, 74.5, 73.8, 60.2, 59.0, 39.2, 21.3; **HRMS** (ESI) calcd for  $\text{C}_{34}\text{H}_{36}\text{NO}$   $[\text{M}+\text{H}]^+$ : 474.2797, found: 474.2798.

***Trans*-1-(1-(4-methoxyphenyl)-3-vinylisochroman-4-yl)-*N,N*-bis(4-methylbenzyl)methanamine (3nb)**

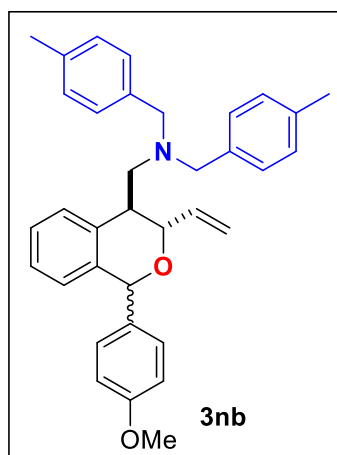

The title compound was prepared according to the general procedure and purified by column chromatography to give colorless oil, 121 mg, 80% yield, 2.8:1 dr.

**3nb-1:**  $^1\text{H NMR}$  (400 MHz,  $\text{CDCl}_3$ )  $\delta$  7.37 (d,  $J = 7.6$  Hz, 1H), 7.14-7.25 (m, 3H), 7.09-7.11 (m, 6H), 7.03-7.05 (m, 3H), 6.79-6.84 (m, 3H), 5.84-5.92 (m, 1H), 5.74 (s, 1H), 5.22-5.27 (m, 1H), 5.08-5.11 (m, 1H), 4.46-4.48 (m, 1H), 3.76 (s, 3H), 3.71 (d,  $J = 13.6$  Hz, 2H), 3.45 (d,  $J = 14.0$

Hz, 2H), 2.99-3.03 (m, 1H), 2.82 (dd,  $J = 13.2$  Hz, 5.6 Hz, 1H), 2.71 (dd,  $J = 12.8$  Hz, 8.0 Hz, 1H), 2.30 (s, 6H);  $^{13}\text{C NMR}$  (100 MHz,  $\text{CDCl}_3$ )  $\delta$  159.2, 138.3, 136.8, 136.3, 135.4, 135.1, 130.5, 130.2, 129.7, 128.9, 128.6, 127.0, 126.2, 126.0, 115.8, 113.6, 76.7, 72.1, 58.5, 55.4, 55.3, 40.5, 21.2; **HRMS** (ESI) calcd for  $\text{C}_{35}\text{H}_{38}\text{NO}_2$   $[\text{M}+\text{H}]^+$ : 504.2897, found: 504.2903.

**3nb-2:**  $^1\text{H NMR}$  (400 MHz,  $\text{CDCl}_3$ )  $\delta$  7.23 (d,  $J = 8.0$  Hz, 4H), 7.16 (d,  $J = 4.0$  Hz, 2H), 7.02-7.08 (m, 5H), 6.83-6.86 (m, 2H), 6.64-6.72 (m, 3H), 6.02-6.11 (m, 1H), 5.58 (s, 1H), 5.19-5.27 (m, 2H), 4.94 (d,  $J = 5.2$  Hz, 1H), 3.78 (s, 3H), 3.73 (d,  $J = 13.6$  Hz, 2H), 3.60 (d,  $J = 13.6$  Hz, 2H), 2.90-3.02 (m, 2H), 2.64 (dd,  $J = 12.0$  Hz, 5.2 Hz, 1H), 2.30 (s, 6H);  $^{13}\text{C NMR}$  (100 MHz,  $\text{CDCl}_3$ )  $\delta$  159.3, 137.4, 136.8, 136.4, 136.4, 134.9, 134.6, 130.0, 129.8, 129.1, 128.9, 126.4, 126.3, 126.3, 118.5, 113.8, 74.0, 73.9, 60.3, 58.9, 55.3, 39.2, 21.3; **HRMS** (ESI) calcd for  $\text{C}_{35}\text{H}_{38}\text{NO}_2$   $[\text{M}+\text{H}]^+$ : 504.2897, found: 504.2893.

***Trans*-1-(1,1-dimethyl-3-vinylisochroman-4-yl)-*N,N*-bis(4-methylbenzyl)methanamine (3ob)**

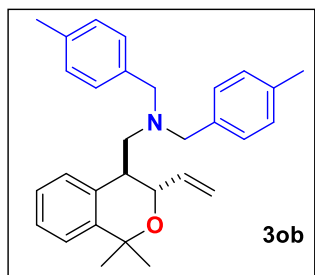

The title compound was prepared according to the general procedure and purified by column chromatography to give colorless oil, 41 mg, 32% yield, > 20:1 dr.  $^1\text{H NMR}$  (400 MHz,  $\text{CDCl}_3$ )  $\delta$  7.41 (d,  $J = 7.2$  Hz, 1H), 7.16-7.21 (m, 4H), 7.08-7.15 (m, 6H), 7.02-7.04 (m, 1H), 5.95-6.04 (m, 1H), 5.27 (d,  $J = 17.2$  Hz, 1H), 5.15 (d,  $J = 10.4$  Hz, 1H), 4.39 (t,  $J = 6.4$  Hz, 1H), 3.64 (d,  $J = 13.2$  Hz, 2H), 3.48 (d,  $J = 13.6$  Hz, 2H), 2.91-2.95 (m, 1H), 2.61-2.71 (m, 2H), 2.31 (s, 6H), 1.51 (s, 3H), 1.28 (s, 3H);  $^{13}\text{C NMR}$  (100 MHz,  $\text{CDCl}_3$ )  $\delta$  142.7, 139.3, 136.5, 136.2, 135.4, 129.2, 129.0, 126.2, 126.1, 124.8, 117.2, 74.3, 73.5, 58.6, 58.3, 40.3, 31.6, 30.8, 21.2; **HRMS** (ESI) calcd for  $\text{C}_{30}\text{H}_{36}\text{NO}$   $[\text{M}+\text{H}]^+$ : 426.2797, found: 426.2805.

***Trans-N,N*-bis(4-methylbenzyl)-1-(3-(prop-1-en-2-yl)isochroman-4-yl)methanamine (3pb)**

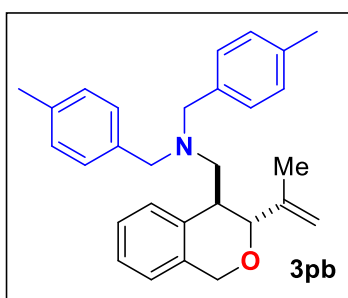

The title compound was prepared according to the general procedure and purified by column chromatography to give colorless oil, 37 mg, 30% yield, > 20:1 dr.  $^1\text{H NMR}$  (500 MHz,  $\text{CDCl}_3$ )  $\delta$  7.18-7.24 (m, 5H), 7.09-7.15 (m, 6H), 6.87-6.89 (m, 1H), 4.88 (s, 1H), 4.66 (s, 1H), 4.51-4.54 (m, 3H), 3.56-3.62 (m, 4H), 2.98-2.98 (m, 1H), 2.89 (dd,  $J = 12.0$  Hz, 9.0 Hz, 1H), 2.91-2.95 (m, 1H), 2.59 (dd,  $J = 13.0$  Hz, 5.5 Hz, 1H), 2.32 (s, 6H), 1.81 (s, 3H);  $^{13}\text{C NMR}$  (125 MHz,  $\text{CDCl}_3$ )  $\delta$  143.1, 136.5, 136.3, 135.7, 134.9, 129.2, 129.05, 129.00, 126.4, 125.9, 123.9, 114.2, 63.5, 60.3, 58.6, 37.5, 21.2, 20.3; **HRMS** (ESI) calcd for  $\text{C}_{29}\text{H}_{34}\text{NO}$   $[\text{M}+\text{H}]^+$ : 412.2640, found: 412.2639.

***Trans-N,N*-bis(4-methylbenzyl)-1-(3-((*E*)-prop-1-en-1-yl)isochroman-4-yl)methanamine (3qb)**

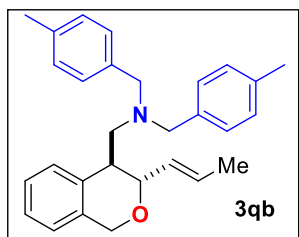

The title compound was prepared according to the general procedure and purified by column chromatography to give colorless oil, 43 mg, 35% yield, > 20:1 dr. **<sup>1</sup>H NMR** (400 MHz, CDCl<sub>3</sub>) δ 7.20-7.23 (m, 5H), 7.09-7.14 (m, 6H), 6.90-6.92 (m, 1H), 5.65-5.75, (m, 1H), 5.41-5.46 (m, 1H), 4.96 (dd, *J* = 8.4 Hz, 2.0 Hz, 1H), 4.75 (d, *J* = 15.6 Hz, 1H), 4.58 (d, *J* = 15.6 Hz, 1H), 3.67 (d, *J* = 13.6 Hz, 2H), 3.57 (d, *J* = 13.7 Hz, 2H), 2.88 (dd, *J* = 12.4 Hz, 8.8 Hz, 1H), 2.67-2.71 (m, 1H), 2.56 (dd, *J* = 12.8 Hz, 5.2 Hz, 1H), 2.31 (s, 6H), 1.84 (dd, *J* = 6.8 Hz, 1.6 Hz, 3H); **<sup>13</sup>C NMR** (100 MHz, CDCl<sub>3</sub>) δ 136.4, 136.2, 135.2, 134.9, 130.0, 129.9, 129.0, 129.02, 128.7, 126.3, 126.1, 123.9, 69.2, 63.2, 59.5, 58.4, 41.1, 21.2, 13.9; **HRMS** (ESI) calcd for C<sub>29</sub>H<sub>34</sub>NO [M+H]<sup>+</sup>: 412.2640, found: 412.2644.

***Trans*-*N,N*-dibenzyl-1-(3-((*E*)-prop-1-en-1-yl)isochroman-4-yl)methanamine (3ra)**

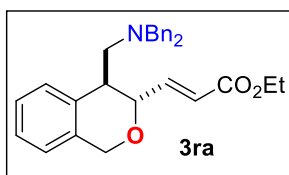

The title compound was prepared according to the general procedure and purified by column chromatography to give colorless oil, 43 mg, 35% yield, > 20:1 dr. **<sup>1</sup>H NMR** (400 MHz, CDCl<sub>3</sub>) δ 7.23-7.32 (m, 10H), 7.10-7.18 (m, 3H), 7.03 (dd, *J* = 16.0 Hz, 5.2 Hz, 1H), 6.90-6.92 (m, 1H), 5.95 (dd, *J* = 16.0 Hz, 1.6 Hz, 2H), 4.79-4.80 (m, 1H), 4.75 (d, *J* = 15.2 Hz, 1H), 4.58 (d, *J* = 15.2 Hz, 1H), 4.13-4.18 (m, 2H), 3.75 (d, *J* = 13.6 Hz, 2H), 3.58 (d, *J* = 13.6 Hz, 2H), 2.92 (dd, *J* = 12.8 Hz, 10.0 Hz, 1H), 2.77-2.80 (m, 1H), 2.61 (dd, *J* = 12.8 Hz, 4.4 Hz, 1H), 1.28 (t, *J* = 7.2 Hz, 3H); **<sup>13</sup>C NMR** (125 MHz, CDCl<sub>3</sub>) δ 166.4, 147.0, 139.2, 134.2, 134.0, 129.3, 129.1, 128.4, 127.2, 126.7, 126.5, 124.3, 122.6, 73.1, 63.9, 60.5, 59.9, 59.5, 40.2, 14.4; **HRMS** (ESI) calcd for C<sub>29</sub>H<sub>32</sub>NO<sub>3</sub> [M+H]<sup>+</sup>: 442.2382, found: 442.2377.

***Cis*-*N,N*-dibenzyl-1-(3-vinylisochroman-4-yl)methanamine (4aa)**

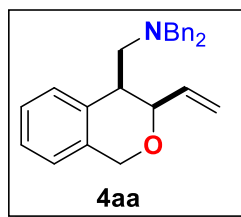

The title compound was prepared according to the general procedure and purified by column chromatography to give colorless oil, 98 mg, 89% yield (combination yield of *cis*- and *trans*-product), 14:1 dr.  $^1\text{H NMR}$  (400 MHz,  $\text{CDCl}_3$ )  $\delta$  7.27-7.30

(m, 1H), 7.15-7.23 (m, 12H), 6.92-6.94 (m, 1H), 5.93-6.01 (m, 1H), 5.33 (dt,  $J = 17.6$  Hz, 2.0 Hz, 1H), 5.20 (dt,  $J = 10.8$  Hz, 1.6 Hz, 1H), 4.73-4.82 (m, 2H), 4.29-4.32 (m, 1H), 3.76 (d,  $J = 14.0$  Hz, 2H), 3.45 (d,  $J = 14.0$  Hz, 2H), 2.80-2.89 (m, 2H), 2.62 (dd,  $J = 12.8$  Hz, 8.0 Hz, 1H);  $^{13}\text{C NMR}$  (100 MHz,  $\text{CDCl}_3$ )  $\delta$  139.2, 137.4, 137.0, 133.8, 130.1, 128.7, 128.1, 126.7, 126.3, 125.6, 123.8, 115.1, 76.7, 67.8, 58.8, 55.6, 40.4; **HRMS** (ESI) calcd for  $\text{C}_{26}\text{H}_{27}\text{NONa}$   $[\text{M}+\text{Na}]^+$ : 392.1990, found: 392.1982.

#### ***Cis*-*N,N*-bis(4-methylbenzyl)-1-(3-vinylisochroman-4-yl)methanamine (4ab)**

The title compound was prepared according to the general procedure and purified by

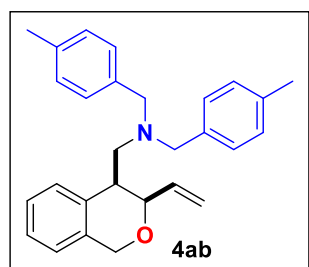

column chromatography to give colorless oil, 93 mg, 78% yield (combination yield of *cis*- and *trans*-product), 15:1 dr.  $^1\text{H NMR}$  (400 MHz,  $\text{CDCl}_3$ )  $\delta$  7.26-7.29 (m, 1H), 7.18-7.22

(m, 2H), 7.06-7.09 (m, 4H), 7.02-7.04 (m, 4H), 6.94-6.96 (m, 1H), 5.96-6.02 (m, 1H), 5.32 (dt,  $J = 14.0$  Hz, 1.2 Hz, 1H), 5.20 (dt,  $J = 8.4$  Hz, 1.2 Hz, 1H), 4.77-4.83 (m, 2H), 4.30-4.32 (m, 1H), 3.68 (d,  $J = 11.2$  Hz, 2H), 3.43 (d,  $J = 10.8$  Hz, 2H), 2.81-2.89 (m, 2H), 2.59 (dd,  $J = 8.0$  Hz, 4.0 Hz, 1H), 2.30 (s, 6H);  $^{13}\text{C NMR}$  (100 MHz,  $\text{CDCl}_3$ )  $\delta$  137.7, 137.2, 136.3, 136.2, 134.0, 130.3, 128.9, 128.8, 126.4, 125.8, 123.9, 115.2, 68.0, 58.5, 55.7, 40.6, 21.2; **HRMS** (ESI) calcd for  $\text{C}_{28}\text{H}_{32}\text{NO}$   $[\text{M}+\text{H}]^+$ : 398.2484, found: 398.2483.

#### ***Cis*-*N,N*-bis(4-(tert-butyl)benzyl)-1-(3-vinylisochroman-4-yl)methanamine (4ac)**



The title compound was prepared according to the general procedure and purified by

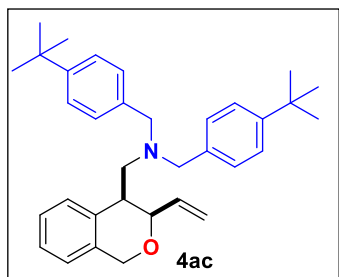

column chromatography to give colorless oil, 100 mg, 69%

yield (combination yield of *cis*- and *trans*-product), 14:1

dr. <sup>1</sup>H NMR (500 MHz, CDCl<sub>3</sub>) δ 7.28-7.29 (m, 1H),

7.19-7.24 (m, 6H), 7.12-7.14 (m, 4H), 6.92-6.93 (m, 1H),

5.95-6.01 (m, 1H), 5.31 (dt, *J* = 17.5 Hz, 1.2 Hz, 1H), 5.19

(dt, *J* = 11.0 Hz, 1.5 Hz, 1H), 4.70-4.82 (m, 2H), 4.30-4.32 (m, 1H), 3.75 (d, *J* = 14.0

Hz, 2H), 3.40 (d, *J* = 13.5 Hz, 2H), 2.86-2.89 (m, 1H), 2.81 (dd, *J* = 13.5 Hz, 5.5 Hz,

1H), 2.61 (dd, *J* = 13.5 Hz, 8.5 Hz, 1H), 1.29 (s, 18H); <sup>13</sup>C NMR (100 MHz, CDCl<sub>3</sub>) δ

149.5, 137.7, 137.1, 136.4, 133.9, 130.4, 128.6, 126.4, 125.7, 125.0, 123.9, 115.3, 77.4,

67.9, 58.5, 55.4, 40.7, 34.5, 31.5; HRMS (ESI) calcd for C<sub>34</sub>H<sub>44</sub>NO [M+H]<sup>+</sup>: 482.3423,

found: 482.3418.

#### *Cis*-*N,N*-bis(4-methoxybenzyl)-1-(3-vinylisochroman-4-yl)methanamine (4ad)

The title compound was prepared according to the general procedure and purified by

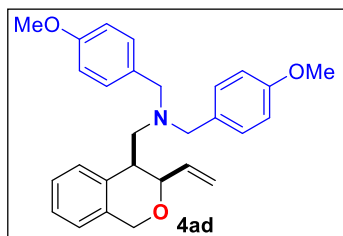

column chromatography to give colorless oil, 96 mg, 75%

yield (combination yield of *cis*- and *trans*-product), 8:1 dr.

<sup>1</sup>H NMR (400 MHz, CDCl<sub>3</sub>) δ 7.26-7.30 (m, 1H), 7.17-

7.22 (m, 2H), 7.09-7.12 (m, 4H), 6.92-6.96 (m, 1H), 6.74-

6.78 (m, 4H), 5.94-6.02 (m, 1H), 5.33 (dt, *J* = 17.2 Hz, 1.6

Hz, 1H), 5.20 (dt, *J* = 10.8 Hz, 1.6 Hz, 1H), 4.75-4.83 (m, 2H), 4.29-4.31 (m, 1H), 3.76

(s, 6H), 3.65 (d, *J* = 13.6 Hz, 2H), 3.39 (d, *J* = 13.6 Hz, 2H), 2.79-2.87 (m, 2H), 2.58

(dd, *J* = 12.0 Hz, 7.2 Hz, 1H); <sup>13</sup>C NMR (100 MHz, CDCl<sub>3</sub>) δ 158.5, 137.7, 137.2,

134.0 131.4, 130.2, 130.0, 126.4, 125.7, 123.9, 115.2, 113.6, 68.0, 58.1, 55.5, 55.3, 40.6;

HRMS (ESI) calcd for C<sub>28</sub>H<sub>32</sub>NO<sub>3</sub> [M+H]<sup>+</sup>: 430.2382, found: 430.2399.

#### *Cis*-*N,N*-bis(4-fluorobenzyl)-1-(3-vinylisochroman-4-yl)methanamine (4ae)

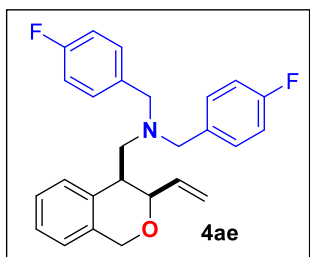

The title compound was prepared according to the general procedure and purified by column chromatography to give colorless oil, 75 mg, 62% yield (combination yield of *cis*- and *trans*-product), 8:1 dr.  $^1\text{H NMR}$  (500 MHz,  $\text{CDCl}_3$ )  $\delta$  7.20-7.25 (m, 3H), 7.10-7.13 (m, 4H), 6.87-6.96 (m, 5H),

5.91-5.99 (m, 1H), 5.33 (dt,  $J = 17.5$  Hz, 1.5 Hz, 1H), 5.29 (dt,  $J = 11.0$  Hz, 2.0 Hz, 1H), 4.73-4.83 (m, 2H), 4.30-4.32 (m, 1H), 3.70 (d,  $J = 14.0$  Hz, 2H), 3.38 (d,  $J = 14.0$  Hz, 2H), 2.84-2.88 (m, 1H), 2.80 (dd,  $J = 13.0$  Hz, 5.0 Hz, 1H), 2.59 (dd,  $J = 13.0$  Hz, 8.5 Hz, 1H);  $^{13}\text{C NMR}$  (125 MHz,  $\text{CDCl}_3$ )  $\delta$  162.7 (d,  $J_{\text{C-F}} = 243$  Hz), 137.3, 136.9, 134.7 (d,  $J_{\text{C-F}} = 3$  Hz), 133.8, 130.1 (d,  $J_{\text{C-F}} = 8$  Hz), 126.5, 125.6, 124.0, 115.3, 115.0, 114.8, 77.1, 67.9, 58.0, 55.2, 40.4;  $^{19}\text{F NMR}$  (376 MHz,  $\text{CDCl}_3$ )  $\delta$  -116.3; **HRMS** (ESI) calcd for  $\text{C}_{26}\text{H}_{26}\text{F}_2\text{NO}$   $[\text{M}+\text{H}]^+$ : 406.1982, found: 406.1977.

#### *Cis*-*N,N*-bis(3-fluorobenzyl)-1-(3-vinylisochroman-4-yl)methanamine (4af)

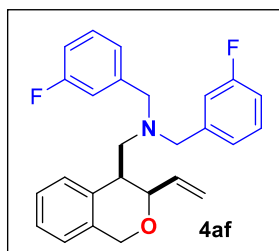

The title compound was prepared according to the general procedure and purified by column chromatography to give colorless oil, 60 mg, 49% yield (combination yield of *cis*- and *trans*-product), 7:1 dr.  $^1\text{H NMR}$  (500 MHz,  $\text{CDCl}_3$ )  $\delta$  7.23-7.26 (m, 3H), 7.15-7.19 (m, 2H), 6.97-6.98 (m, 3H), 6.85-6.89 (m,

4H), 5.92-5.98 (m, 1H), 5.33 (dt,  $J = 17.5$  Hz, 1.5 Hz, 1H), 5.23 (dt,  $J = 11$  Hz, 1.5 Hz, 1H), 4.85 (abq,  $J = 15.2$  Hz, 2 H), 4.34 (m, 1H), 3.76 (d,  $J = 14.5$  Hz, 2H), 3.42 (s,  $J = 14$  Hz, 2H), 2.89 (m, 1H), 2.82 (dd,  $J = 13.0$  Hz, 5.0 Hz, 1H), 2.62 (dd,  $J = 13.0$  Hz, 8.5 Hz, 1H);  $^{13}\text{C NMR}$  (125 MHz,  $\text{CDCl}_3$ )  $\delta$  164.0 (d,  $J_{\text{C-F}} = 244$  Hz), 141.9 (d,  $J_{\text{C-F}} = 7$  Hz), 137.2, 137.0, 133.9, 130.2, 129.7 (d,  $J_{\text{C-F}} = 8$  Hz), 126.8, 125.8, 124.3 (d,  $J_{\text{C-F}} = 3$  Hz), 124.2, 115.6 (d,  $J_{\text{C-F}} = 8$  Hz), 115.4, 113.9 (d,  $J_{\text{C-F}} = 21$  Hz), 77.2, 68.1, 58.6, 55.6, 40.6;  $^{19}\text{F NMR}$  (470 MHz,  $\text{CDCl}_3$ )  $\delta$  -113.5; **HRMS** (ESI) calcd for  $\text{C}_{26}\text{H}_{26}\text{F}_2\text{NO}$   $[\text{M}+\text{H}]^+$ : 406.1982, found: 406.1983.

### *Cis-N,N*-bis(2-fluorobenzyl)-1-(3-vinylisochroman-4-yl)methanamine (**4ag**)

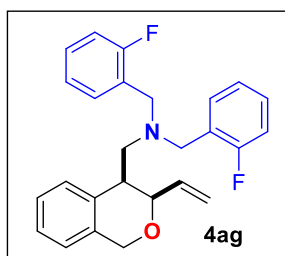

The title compound was prepared according to the general procedure and purified by column chromatography to give colorless oil, 89 mg, 73% yield (combination yield of *cis*- and *trans*-product), 6:1 dr.  $^1\text{H NMR}$  (400 MHz,  $\text{CDCl}_3$ )  $\delta$  7.25-7.28 (m, 1H), 7.12-7.22 (m, 6H), 6.93-6.98 (m, 5H), 5.93-6.02

(m, 1H), 5.33 (dt,  $J = 19.2$  Hz, 1.6 Hz, 1H), 5.20 (dt,  $J = 10.4$  Hz, 1.6 Hz, 1H), 4.76-4.85 (m, 2 H), 4.32-4.33 (m, 1H), 3.77 (d,  $J = 14.4$  Hz, 2H), 3.64 (d,  $J = 14.4$  Hz, 2H), 2.84-2.91 (m, 2H), 2.57-2.63(m, 1H);  $^{13}\text{C NMR}$  (125 MHz,  $\text{CDCl}_3$ )  $\delta$  162.4 (d,  $J_{\text{C-F}} = 244$  Hz), 137.4, 136.9, 133.9, 131.0 (d,  $J_{\text{C-F}} = 4$  Hz), 130.3, 128.4 (d,  $J_{\text{C-F}} = 8$  Hz), 126.5, 126.0 (d,  $J_{\text{C-F}} = 14$  Hz), 125.8, 123.94, 123.88 (d,  $J_{\text{C-F}} = 3$  Hz), 115.3, 115.2 (d,  $J_{\text{C-F}} = 22$  Hz), 77.2, 68.1, 55.6, 51.7 (d,  $J_{\text{C-F}} = 2$  Hz), 40.5;  $^{19}\text{F NMR}$  (470 MHz,  $\text{CDCl}_3$ )  $\delta$  -117.8; **HRMS** (ESI) calcd for  $\text{C}_{26}\text{H}_{26}\text{F}_2\text{NO}$   $[\text{M}+\text{H}]^+$ : 406.1982, found: 406.1989.

### *Cis-N,N*-bis(4-chlorobenzyl)-1-(3-vinylisochroman-4-yl)methanamine (**4ah**)

The title compound was prepared according to the general procedure and purified by

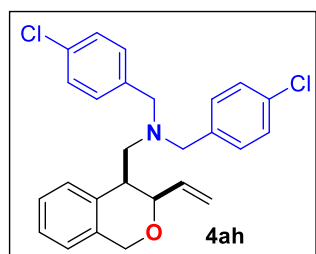

column chromatography to give colorless oil, 69 mg, 53% yield (combination yield of *cis*- and *trans*-product), 6:1 dr.  $^1\text{H NMR}$  (500 MHz,  $\text{CDCl}_3$ )  $\delta$  7.16-7.26 (m, 7H), 7.06-7.08 (m, 4H), 6.97-6.98 (m, 1H), 6.74-6.78 (m, 1H), 5.94-6.02 (m, 1H), 5.33 (dt,  $J = 17.0$  Hz, 1.5 Hz, 1H), 5.22 (dt,  $J$

$= 10.5$  Hz, 1.5 Hz, 1H), 4.84 (abq,  $J = 15.3$  Hz, 2H), 4.31-4.33 (m, 1H), 3.71 (d,  $J = 14.0$  Hz, 2H), 3.37 (d,  $J = 14.0$  Hz, 2H), 2.85-2.88 (m, 1H), 2.76-2.80(m, 1H), 2.55-2.60 (m, 1H);  $^{13}\text{C NMR}$  (125 MHz,  $\text{CDCl}_3$ )  $\delta$  137.6, 137.3, 137.0, 134.0, 132.5, 130.2, 130.0, 128.4, 126.7, 125.7, 124.1, 115.5, 68.0, 58.2, 55.4, 40.5; **HRMS** (ESI) calcd for  $\text{C}_{26}\text{H}_{26}\text{Cl}_2\text{NO}$   $[\text{M}+\text{H}]^+$ : 438.1391, found: 438.1390.

### *Cis-N,N*-bis(4-bromobenzyl)-1-(3-vinylisochroman-4-yl)methanamine (**4ai**)

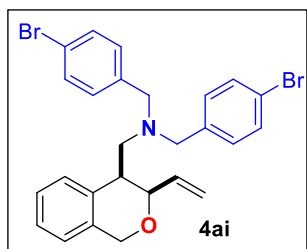

The title compound was prepared according to the general procedure and purified by column chromatography to give colorless oil, 68 mg, 43% yield (combination yield of *cis*- and *trans*-product), 7:1 dr.  $^1\text{H NMR}$  (400 MHz,  $\text{CDCl}_3$ )  $\delta$  7.31-7.33 (m, 4H), 7.21-7.24 (m, 3H), 6.97-7.02 (m, 5H),

5.91-5.99 (m, 1H), 5.34 (d,  $J = 17.6$  Hz, 1H), 5.22 (d,  $J = 10.8$  Hz, 1H), 4.74-4.84 (m, 2H), 4.32-4.32 (m, 1H), 3.70 (d,  $J = 14.4$  Hz, 2H), 3.36 (d,  $J = 14.0$  Hz, 2H), 2.75-2.86 (m, 2H), 2.54-2.60 (m, 1H);  $^{13}\text{C NMR}$  (100 MHz,  $\text{CDCl}_3$ )  $\delta$  138.1, 137.3, 136.9, 134.0, 131.4, 130.4, 130.2, 126.7, 125.7, 124.1, 120.6, 115.5, 77.1, 68.0, 58.3, 55.4, 40.5; **HRMS** (ESI) calcd for  $\text{C}_{26}\text{H}_{26}\text{Br}_2\text{NO}$   $[\text{M}+\text{H}]^+$ : 526.0381, found: 526.0395.

***Cis*-*N,N*-bis(4-(trifluoromethyl)benzyl)-1-(3-vinylisochroman-4-yl)methanamine (4aj)**

The title compound was prepared according to the general procedure and purified by

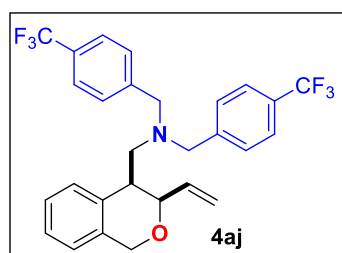

column chromatography to give colorless oil, 48 mg, 32% yield (combination yield of *cis*- and *trans*-product), 3:1 dr.  $^1\text{H NMR}$  (500 MHz,  $\text{CDCl}_3$ )  $\delta$  7.46 (d,  $J = 8.0$  Hz, 4H), 7.24-7.29 (m, 7H), 6.98 (d,  $J = 7.0$  Hz, 1H), 5.92-5.99 (m, 1H), 5.34 (d,  $J = 17.5$  Hz, 1H), 5.23 (d,  $J = 11.0$  Hz, 1H),

4.84 (d,  $J = 15.5$  Hz, 1H), 4.72 (d,  $J = 15.0$  Hz, 1H), 4.34-4.35 (m, 1H), 3.84 (d,  $J = 14.0$  Hz, 2H), 3.47 (d,  $J = 14.5$  Hz, 2H), 2.87-2.90 (m, 1H), 2.79-2.82 (m, 1H), 2.60-2.64 (m, 1H);  $^{13}\text{C NMR}$  (125 MHz,  $\text{CDCl}_3$ )  $\delta$  143.2, 137.1, 136.8, 134.0, 130.3, 129.6 (q,  $J_{\text{C-F}} = 32$  Hz), 128.8, 127.6 (q,  $J_{\text{C-F}} = 270$  Hz), 126.9, 125.7, 125.3 (d,  $J_{\text{C-F}} = 4$  Hz), 124.2, 115.6, 77.0, 68.0, 58.6, 55.4, 40.5;  $^{19}\text{F NMR}$  (470 MHz,  $\text{CDCl}_3$ )  $\delta$  -62.4; **HRMS** (ESI) calcd for  $\text{C}_{28}\text{H}_{26}\text{F}_6\text{NO}$   $[\text{M}+\text{H}]^+$ : 506.1919, found: 506.1922.

***Cis*-4-((3-vinylisochroman-4-yl)methyl)morpholine (4ak)**

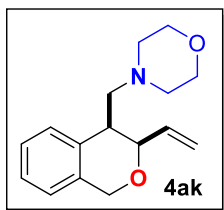

The title compound was prepared according to the general procedure and purified by column chromatography to give colorless oil, 53 mg, 68% yield (combination yield of *cis*- and *trans*-product), 6:1 dr.  $^1\text{H NMR}$  (500 MHz,  $\text{CDCl}_3$ )  $\delta$  7.17-7.23 (m, 3H), 6.99-7.00 (m, 1H), 6.09-6.16 (m, 1H), 5.36 (dt,  $J = 17.5$  Hz, 1.5 Hz, 1H), 5.20 (dt,  $J = 11.0$  Hz, 2.0 Hz, 1H), 4.87-4.96 (m, 2H), 4.33-4.35 (m, 1H), 3.68 (t,  $J = 4.5$  Hz, 4H), 2.86-2.89 (m, 1H), 2.78 (dd,  $J = 13.0$  Hz, 7.0 Hz, 1H), 2.30-2.50 (m, 5H);  $^{13}\text{C NMR}$  (125 MHz,  $\text{CDCl}_3$ )  $\delta$  137.5, 137.2, 134.2, 129.8, 126.5, 126.1, 124.0, 114.8, 77.6, 68.3, 67.3, 60.6, 54.1, 39.4; **HRMS** (ESI) calcd for  $\text{C}_{16}\text{H}_{22}\text{NO}_2$   $[\text{M}+\text{H}]^+$ : 260.1651, found: 260.1650.

#### *Cis*-*N*-propyl-*N*-((3-vinylisochroman-4-yl)methyl)propan-1-amine (4al)

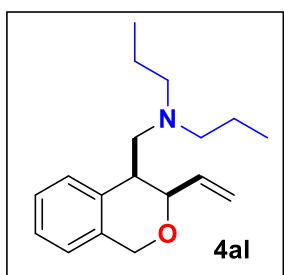

The title compound was prepared according to the general procedure and purified by column chromatography to give colorless oil, 72 mg, 88% yield (combination yield of *cis*- and *trans*-product), 2:1 dr.  $^1\text{H NMR}$  (500 MHz,  $\text{CDCl}_3$ )  $\delta$  7.28-7.30 (m, 1H), 7.13-7.18 (m, 2H), 6.97-7.00 (m, 1H), 6.06-6.13 (m, 1H), 5.37 (dt  $J = 17.5$  Hz, 1.5 Hz, 1H), 5.21 (dt,  $J = 10.5$  Hz, 2.0 Hz, 1H), 4.87-4.96 (m, 2H), 4.33-4.34 (m, 1H), 2.76-2.80 (m, 2H), 2.28-2.43 (m, 5H), 1.30-1.38 (m, 4H), 0.83 (t,  $J = 7.5$  Hz, 6H);  $^{13}\text{C NMR}$  (125 MHz,  $\text{CDCl}_3$ )  $\delta$  138.1, 137.3, 133.8, 130.2, 126.2, 125.8, 123.8, 115.0, 76.9, 68.3, 56.9, 56.6, 40.7, 20.2, 12.1; **HRMS** (ESI) calcd for  $\text{C}_{18}\text{H}_{28}\text{NO}$   $[\text{M}+\text{H}]^+$ : 274.2171, found: 274.2171.

#### *Cis*-*N,N*-dibenzyl-1-(7-methyl-3-vinylisochroman-4-yl)methanamine (4ba)

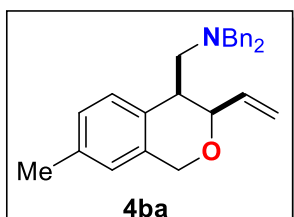

The title compound was prepared according to the general procedure and purified by column chromatography to give colorless oil, 90 mg, 78% yield (combination yield of *cis*- and *trans*-product), 7:1 dr.  $^1\text{H NMR}$  (500 MHz,  $\text{CDCl}_3$ )  $\delta$  7.17-7.25 (m, 11H), 7.02-7.03 (m, 1H), 6.77 (s, 1H), 5.94-6.01 (m, 1H), 5.31 (dt,  $J = 17.0$  Hz, 1.5 Hz, 1H), 5.19 (dt,  $J = 11.0$  Hz, 1.5 Hz, 1H), 4.79 (q,  $J =$

15.0 Hz, 2H), 4.28-4.30 (m, 1H), 3.73 (d,  $J = 13.5$  Hz, 2H), 3.47 (d,  $J = 13.5$  Hz, 2H), 2.81-2.85 (m, 2H), 2.54-2.59 (m, 1H), 2.34 (s, 3H);  $^{13}\text{C}$  NMR (125 MHz,  $\text{CDCl}_3$ )  $\delta$  139.4, 137.2, 136.0, 134.6, 133.8, 130.1, 128.9, 128.2, 126.8, 126.7, 124.4, 115.2, 77.5, 68.0, 58.9, 55.9, 40.3, 21.3; **HRMS** (ESI) calcd for  $\text{C}_{27}\text{H}_{30}\text{NO}$   $[\text{M}+\text{H}]^+$ : 384.2327, found: 384.2330.

#### *Cis-N,N*-dibenzyl-1-(7-methoxy-3-vinylisochroman-4-yl)methanamine (**4ca**)

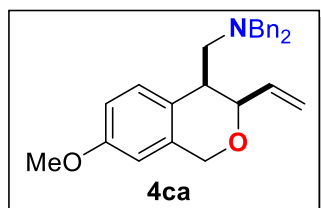

The title compound was prepared according to the general procedure and purified by column chromatography to give colorless oil, 81 mg, 68% yield (combination yield of *cis*- and *trans*-product), 7:1 dr.  $^1\text{H}$  NMR (400 MHz,  $\text{CDCl}_3$ )  $\delta$

7.16-7.24 (m, 11H), 6.77-6.80 (m, 1H), 6.47-6.48 (m, 1H), 5.93-6.10 (m, 1H), 5.32 (dt,  $J = 17.2$  Hz, 1.6 Hz, 1H), 5.19 (dt,  $J = 10.8$  Hz, 1.6 Hz, 1H), 4.79 (abq,  $J = 15.2$  Hz, 2H), 4.27-4.29 (m, 1H), 3.80 (s, 3H), 3.74 (d,  $J = 13.6$  Hz, 2H), 3.45 (d,  $J = 13.6$  Hz, 2H), 2.78-2.84 (m, 2H), 2.53-2.59 (m, 1H);  $^{13}\text{C}$  NMR (100 MHz,  $\text{CDCl}_3$ )  $\delta$  158.3, 139.4, 137.2, 135.1, 131.3, 129.8, 128.9, 128.2, 126.8, 115.2, 112.2, 108.4, 77.7, 68.1, 59.0, 55.9, 55.4, 39.9; **HRMS** (ESI) calcd for  $\text{C}_{27}\text{H}_{30}\text{NO}_2$   $[\text{M}+\text{H}]^+$ : 400.2277, found: 400.2274.

#### *Cis-N,N*-dibenzyl-1-(6-methoxy-3-vinylisochroman-4-yl)methanamine (**4da**)

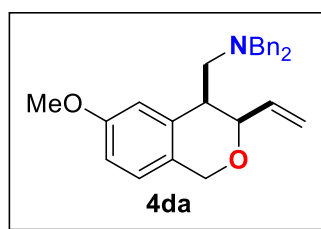

The title compound was prepared according to the general procedure and purified by column chromatography to give colorless oil, 109 mg, 91% yield (combination yield of *cis*- and *trans*-product), 7:1 dr.  $^1\text{H}$  NMR (500 MHz,  $\text{CDCl}_3$ )  $\delta$

7.16-7.25 (m, 10H), 6.76-6.86 (m, 3H), 5.94-6.00 (m, 1H), 5.32 (dt,  $J = 17.5$  Hz, 2.0 Hz, 1H), 5.19 (dt,  $J = 10.5$  Hz, 1.5 Hz, 1H), 4.70-4.77 (m, 2H), 4.26-4.28 (m, 1H), 3.79 (s, 3H), 3.72 (d,  $J = 14.0$  Hz, 2H), 3.47 (d,  $J = 14.0$  Hz, 2H), 2.79-2.87 (m, 2H), 2.87 (dd,  $J = 12.5$  Hz, 5.0 Hz, 1H), 2.80-2.81 (m, 1H), 2.63 (dd,  $J = 13.0$  Hz, 7.5 Hz, 1H);  $^{13}\text{C}$  NMR (125 MHz,  $\text{CDCl}_3$ )  $\delta$  157.6, 139.4, 138.9, 137.1, 128.9, 128.2, 126.8, 126.1,

125.0, 115.3, 114.7, 113.1, 77.2, 67.7, 59.1, 55.9, 55.5, 41.0; **HRMS** (ESI) calcd for  $C_{27}H_{30}NO_2$   $[M+H]^+$ : 400.2277, found: 400.2275.

***Cis-N,N*-dibenzyl-1-(6-((*tert*-butyldimethylsilyl)oxy)-3-vinylisochroman-4-yl)methanamine (4ea)**

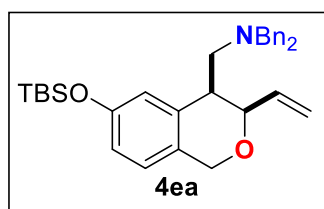

The title compound was prepared according to the general procedure and purified by column chromatography to give colorless oil, 118 mg, 79% yield (combination yield of *cis*- and *trans*-product), 8:1 dr.  **$^1H$  NMR** (400 MHz,  $CDCl_3$ )  $\delta$  7.15-7.25 (m, 10H), 6.78-6.83 (m, 2H), 6.68-6.71 (m, 1H), 5.92-6.01 (m, 1H), 5.32 (dt,  $J = 17.2$  Hz, 2.0 Hz, 1H), 5.19 (dt,  $J = 10.8$  Hz, 1.6 Hz, 1H), 4.69-4.77 (m, 2H), 4.26-4.28 (m, 1H), 3.73 (d,  $J = 13.6$  Hz, 2H), 3.46 (d,  $J = 13.6$  Hz, 2H), 2.75-2.85 (m, 2H), 2.56-2.61 (m, 1H), 1.02 (t,  $J = 2.8$  Hz, 9H), 0.22 (d,  $J = 3.6$  Hz, 6H);  **$^{13}C$  NMR** (125 MHz,  $CDCl_3$ )  $\delta$  153.6, 139.3, 139.0, 137.2, 129.0, 128.2, 126.8, 126.7, 124.8, 121.4, 118.4, 115.2, 77.4, 67.8, 59.1, 55.9, 40.7, 25.9, 18.3, -4.19, -4.20; **HRMS** (ESI) calcd for  $C_{32}H_{42}NO_2Si$   $[M+H]^+$ : 500.2985, found: 500.2980.

***Cis-N,N*-dibenzyl-1-(6,7-dimethoxy-3-vinylisochroman-4-yl)methanamine (4fa)**

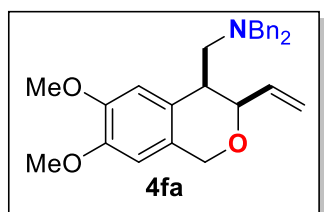

The title compound was prepared according to the general procedure and purified by column chromatography to give colorless oil, 122 mg, 95% yield (combination yield of *cis*- and *trans*-product), 6:1 dr.  **$^1H$  NMR** (400 MHz,  $CDCl_3$ )  $\delta$  7.17-7.25 (m, 10H), 6.76 (s, 1H), 6.43 (s, 1H), 5.95-6.03 (m, 1H), 5.33 (d,  $J = 17.2$  Hz, 1H), 5.21 (dd,  $J = 10.8$  Hz, 0.8 Hz, 1H), 4.67-4.77 (m, 2H), 4.26 (s, 1H), 3.86 (s, 3H), 3.84 (s, 3H), 3.79 (d,  $J = 14.0$  Hz, 2H), 3.46 (d,  $J = 14.0$  Hz, 2H), 2.86 (dd,  $J = 12.8$  Hz, 4.4 Hz, 1H), 2.75-2.77 (m, 1H), 2.65 (dd,  $J = 12.4$  Hz, 8.0 Hz, 1H);  **$^{13}C$  NMR** (125 MHz,  $CDCl_3$ )  $\delta$  148.0, 147.1, 139.4, 137.2, 129.8, 128.8, 128.2, 126.8, 125.7, 115.1, 113.1, 106.7, 77.43, 77.36, 67.8, 59.2, 56.0, 40.3; **HRMS** (ESI) calcd for  $C_{28}H_{32}NO_3$   $[M+H]^+$ : 430.2382, found: 430.2383.

### *Cis-N,N*-dibenzyl-1-(7-fluoro-3-vinylisochroman-4-yl)methanamine (**4ga**)

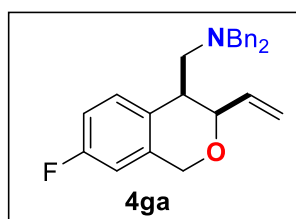

The title compound was prepared according to the general procedure and purified by column chromatography to give colorless oil, 98 mg, 84% yield (combination yield of *cis*- and *trans*-product), 10:1 dr.  $^1\text{H NMR}$  (400 MHz,  $\text{CDCl}_3$ )  $\delta$  7.16-

7.27 (m, 11H), 6.89-6.94 (m, 1H), 6.62-6.65 (m, 1H), 5.91-5.99 (m, 1H), 5.19-5.33 (m, 2H), 4.68-4.78 (m, 2H), 4.26-4.27 (m, 1H), 3.79 (d,  $J = 14.0$  Hz, 2H), 3.41 (d,  $J = 14.0$  Hz, 2H), 2.75-2.83 (m, 2H), 2.59 (dd,  $J = 12.8$  Hz, 8.8 Hz, 1H);  $^{13}\text{C NMR}$  (125 MHz,  $\text{CDCl}_3$ )  $\delta$  162.6 (d,  $J_{\text{C-F}} = 243$  Hz), 139.3, 136.8, 135.8 (d,  $J_{\text{C-F}} = 7$  Hz), 133.3, 132.0 (d,  $J_{\text{C-F}} = 7$  Hz), 128.8, 128.2, 126.9, 115.5, 112.9 (d,  $J_{\text{C-F}} = 21$  Hz), 110.5 (d,  $J_{\text{C-F}} = 22$  Hz), 77.4, 67.8, 59.1, 55.4, 40.0;  $^{19}\text{F NMR}$  (470 MHz,  $\text{CDCl}_3$ )  $\delta$  -116.3; **HRMS** (ESI) calcd for  $\text{C}_{26}\text{H}_{27}\text{FNO}$   $[\text{M}+\text{H}]^+$ : 388.2077, found: 388.2072.

### *Cis-N,N*-dibenzyl-1-(6-fluoro-3-vinylisochroman-4-yl)methanamine (**4ha**)

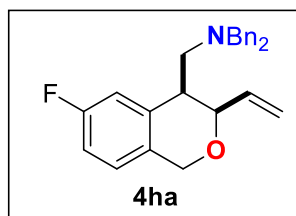

The title compound was prepared according to the general procedure and purified by column chromatography to give colorless oil, 82 mg, 71% yield (combination yield of *cis*- and *trans*-product), 7:1 dr.  $^1\text{H NMR}$  (400 MHz,  $\text{CDCl}_3$ )  $\delta$  7.16-

7.26 (m, 10H), 7.01-7.04 (m, 1H), 6.84-6.92 (m, 2H), 5.89-5.97 (m, 1H), 5.19-5.33 (m, 2H), 4.69-4.77 (m, 2H), 4.25-4.27 (m, 1H), 3.77 (d,  $J = 13.6$  Hz, 2H), 3.41 (d,  $J = 13.6$  Hz, 2H), 2.76-2.82 (m, 2H), 2.55-2.62 (m, 1H);  $^{13}\text{C NMR}$  (125 MHz,  $\text{CDCl}_3$ )  $\delta$  161.9 (d,  $J_{\text{C-F}} = 242.0$  Hz), 139.8 (d,  $J_{\text{C-F}} = 8$  Hz), 139.2, 136.6, 129.4 (d,  $J_{\text{C-F}} = 3$  Hz), 129.0, 128.3, 126.9, 125.4 (d,  $J_{\text{C-F}} = 8$  Hz), 116.8 (d,  $J_{\text{C-F}} = 21$  Hz), 115.6, 113.7 (d,  $J_{\text{C-F}} = 22$  Hz), 67.6, 59.2, 55.4, 40.6;  $^{19}\text{F NMR}$  (470 MHz,  $\text{CDCl}_3$ )  $\delta$  -117.5; **HRMS** (ESI) calcd for  $\text{C}_{26}\text{H}_{27}\text{FNO}$   $[\text{M}+\text{H}]^+$ : 388.2077, found: 388.2072.

### *Cis-N,N*-dibenzyl-1-(5-fluoro-3-vinylisochroman-4-yl)methanamine (**4ia**)



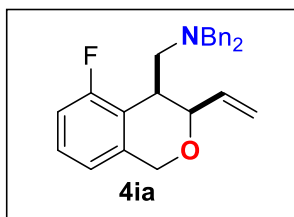

The title compound was prepared according to the general procedure and purified by column chromatography to give colorless oil, 104 mg, 90% yield (combination yield of *cis*- and *trans*-product), 2:1 dr. **<sup>1</sup>H NMR** (500 MHz, CDCl<sub>3</sub>) δ 7.15-7.24 (m, 11H), 6.96 (t, *J* = 8.5 Hz, 1H), 6.73 (d, *J* = 7.5 Hz, 1H), 6.06-6.12 (m, 1H), 5.34 (dt, *J* = 17.5 Hz, 1.5 Hz, 1H), 5.22 (dt, *J* = 11.0 Hz, 1.5 Hz, 1H), 4.70-4.78 (m, 2H), 4.21-4.22 (m, 1H), 3.68 (d, *J* = 14.0 Hz, 2H), 3.53 (d, *J* = 14.0 Hz, 2H), 3.25-3.27 (m, 1H), 2.94 (dd, *J* = 13.5 Hz, 6.5 Hz, 1H), 2.52 (dd, *J* = 13.0 Hz, 6.5 Hz, 1H); **<sup>13</sup>C NMR** (125 MHz, CDCl<sub>3</sub>) δ 161.7 (d, *J*<sub>C-F</sub> = 244 Hz), 139.4, 137.3, 136.6 (d, *J*<sub>C-F</sub> = 5.5 Hz), 129.0, 128.1, 127.6 (d, *J*<sub>C-F</sub> = 8.5 Hz), 126.7, 125.8 (d, *J*<sub>C-F</sub> = 19 Hz), 119.7 (d, *J*<sub>C-F</sub> = 3 Hz), 115.0, 112.8 (d, *J*<sub>C-F</sub> = 22 Hz), 77.4, 67.6, 58.5, 55.1, 35.2; **<sup>19</sup>F NMR** (470 MHz, CDCl<sub>3</sub>) δ -118.0; **HRMS** (ESI) calcd for C<sub>26</sub>H<sub>27</sub>FNO [M+H]<sup>+</sup>: 388.2077, found: 388.2076.

***Cis*-N,N-dibenzyl-1-(7-chloro-3-vinylisochroman-4-yl)methanamine (4ja)**

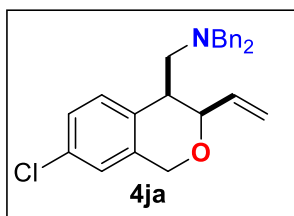

The title compound was prepared according to the general procedure and purified by column chromatography to give colorless oil, 86 mg, 71% yield (combination yield of *cis*- and *trans*-product), 9:1 dr. **<sup>1</sup>H NMR** (400 MHz, CDCl<sub>3</sub>) δ 7.17-7.25 (m, 12H), 6.920-6.922 (m, 1H), 5.89-5.97 (m, 1H), 5.19-5.33 (m, 2H), 4.66-4.76 (m, 2H), 4.25-4.26 (m, 1H), 3.78 (d, *J* = 13.6 Hz, 2H), 3.40 (d, *J* = 14.0 Hz, 2H), 2.75-2.82 (m, 2H), 2.54-2.60 (m, 1H); **<sup>13</sup>C NMR** (125 MHz, CDCl<sub>3</sub>) δ 139.2, 136.6, 136.1, 135.6, 132.1, 131.8, 128.8, 128.3, 126.9, 125.8, 123.9, 115.6, 67.5, 59.2, 55.3, 40.1; **HRMS** (ESI) calcd for C<sub>26</sub>H<sub>27</sub>ClNO [M+H]<sup>+</sup>: 404.1781, found: 404.1780.

***Cis*-N,N-dibenzyl-1-(6-(trifluoromethyl)-3-vinylisochroman-4-yl)methanamine (4ka)**

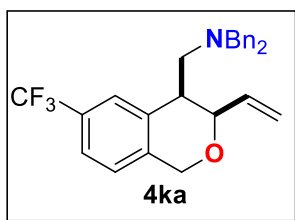

The title compound was prepared according to the general procedure and purified by column chromatography to give colorless oil, 104 mg, 79% yield (combination yield of *cis*- and *trans*-product), > 20:1 dr.  $^1\text{H NMR}$  (500 MHz,  $\text{CDCl}_3$ )  $\delta$  7.63 (s, 1H), 7.45 (d,  $J = 8.0$  Hz, 1H), 7.14-7.23 (m, 10H), 7.00 (d,  $J = 8.0$  Hz, 1H), 5.91-5.98 (m, 1H), 5.23-5.35 (m, 2H), 4.71-4.81 (m, 2H), 4.27-4.28 (m, 1H), 3.85 (d,  $J = 14.0$  Hz, 2H), 3.33 (d,  $J = 13.5$  Hz, 2H), 2.81-2.83 (m, 1H), 2.78 (dd,  $J = 13.5$  Hz, 4.5 Hz, 1H), 2.64 (dd,  $J = 13.0$  Hz, 10.0 Hz, 1H);  $^{13}\text{C NMR}$  (125 MHz,  $\text{CDCl}_3$ )  $\delta$  139.1, 138.4, 137.7, 136.4, 128.8, 128.3, 127.7 (d,  $J_{\text{C-F}} = 4$  Hz), 127.5 (q,  $J_{\text{C-F}} = 270$  Hz), 126.9, 124.4, 123.1 (d,  $J_{\text{C-F}} = 4$  Hz), 115.8, 76.9, 67.8, 59.5, 55.0, 40.3;  $^{19}\text{F NMR}$  (470 MHz,  $\text{CDCl}_3$ )  $\delta$  -62.1; **HRMS** (ESI) calcd for  $\text{C}_{27}\text{H}_{27}\text{F}_3\text{NO}$   $[\text{M}+\text{H}]^+$ : 438.2045, found: 438.2037.

***Cis*-*N,N*-dibenzyl-1-(3-vinyl-3,4-dihydro-1*H*-benzo[*h*]isochromen-4-yl)methanamine (4la)**

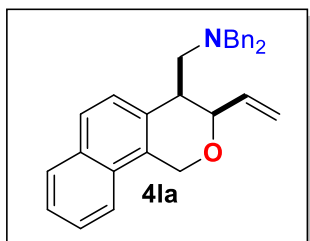

The title compound was prepared according to the general procedure and purified by column chromatography to give colorless oil, 84 mg, 67% yield (combination yield of *cis*- and *trans*-product), 11:1 dr.  $^1\text{H NMR}$  (400 MHz,  $\text{CDCl}_3$ )  $\delta$  7.76-7.79 (m, 1H), 7.64 (d,  $J = 8.4$  Hz, 1H), 7.50-7.52 (m, 1H), 7.30-7.40 (m, 3H), 7.04-7.14 (m, 10H), 5.93-6.02 (m, 1H), 5.30 (d,  $J = 17.2$  Hz, 1H), 5.07-5.17 (m, 3H), 4.29-4.30 (m, 1H), 3.69 (d,  $J = 14.0$  Hz, 2H), 3.41 (d,  $J = 14.0$  Hz, 2H), 2.83-2.89 (m, 2H), 2.58-2.63 (m, 1H);  $^{13}\text{C NMR}$  (125 MHz,  $\text{CDCl}_3$ )  $\delta$  139.3, 137.2, 135.5, 132.4, 129.3, 128.9, 128.7, 128.5, 128.1, 126.8, 126.2, 125.9, 125.4, 121.7, 115.3, 77.1, 66.6, 59.1, 55.9, 41.1; **HRMS** (ESI) calcd for  $\text{C}_{30}\text{H}_{30}\text{NO}$   $[\text{M}+\text{H}]^+$ : 420.2327, found: 420.2331.

***Cis*-*N,N*-dibenzyl-1-(1-phenyl-3-vinylisochroman-4-yl)methanamine (4ma)**

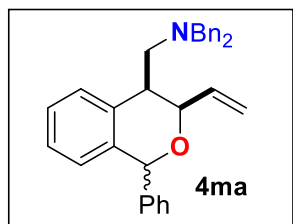

The title compound was prepared according to the general procedure and purified by column chromatography to give colorless oil, 77 mg, 58% yield (combination yield of *cis*- and *trans*-product), 3:1 dr. **<sup>1</sup>H NMR** (500 MHz, CDCl<sub>3</sub>) δ 7.36-7.40 (m, 1H), 7.25-7.31 (m, 4H), 7.17-7.23 (m, 12H), 7.12-7.14 (m, 0.50H), 7.61-7.84 (m, 1.50H), 5.99-6.08 (m, 0.25H), 5.83-5.91 (m, 0.75H), 5.73 (s, 0.73H), 5.67 (s, 0.27H), 5.09-5.32 (m, 2H), 5.49-5.55 (m, 1H), 3.74-3.99 (m, 2H), 3.48 (d, *J* = 14.0 Hz, 1.45H), 3.36 (d, *J* = 14.0 Hz, 0.55H), 3.96-3.03 (m, 1H), 2.69-2.84 (m, 2H); **<sup>13</sup>C NMR** (125 MHz, CDCl<sub>3</sub>) δ 142.8, 142.1, 139.5, 139.4, 138.2, 138.0, 137.3, 137.0, 136.6, 135.0, 130.8, 129.7, 129.2, 128.9, 128.7, 128.5, 128.3, 128.2, 128.0, 127.9, 127.1, 126.8, 126.6, 126.5, 126.3, 126.1, 125.6, 116.0, 115.5, 81.7, 78.2, 77.1, 72.4, 59.3, 59.0, 56.2, 55.3, 40.6, 40.5; **HRMS** (ESI) calcd for C<sub>32</sub>H<sub>32</sub>NO [M+H]<sup>+</sup>: 446.2484, found: 446.2490.

***Cis*-*N,N*-dibenzyl-1-(1-(4-methoxyphenyl)-3-vinylisochroman-4-yl)methanamine (4na)**

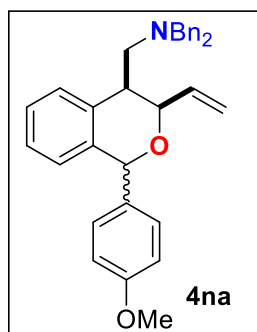

The title compound was prepared according to the general procedure and purified by column chromatography to give colorless oil, 78 mg, 55% yield (combination yield of *cis*- and *trans*-product), 2:1 dr. **<sup>1</sup>H NMR** (400 MHz, CDCl<sub>3</sub>) δ 7.36-7.41 (m, 1H), 7.08-7.28 (m, 13.50H), 6.78-6.84 (m, 2H), 6.61-6.68 (m, 1.50H), 5.98-6.07 (m, 0.32H), 5.83-5.91 (m, 0.68H), 5.71 (s, 0.68H), 5.65 (s, 0.32H), 5.08-5.32 (m, 2H), 4.47-4.54 (m, 1H), 3.94-4.00 (m, 5H), 3.48 (d, *J* = 14.0 Hz, 1.39H), 3.34 (d, *J* = 14.5 Hz, 0.61H), 2.95-3.03 (m, 1H), 2.68-2.84 (m, 2H); **<sup>13</sup>C NMR** (100 MHz, CDCl<sub>3</sub>) δ 159.3, 159.2, 139.5, 139.4, 138.3, 138.1, 137.4, 137.3, 136.8, 135.3, 135.1, 134.6, 130.8, 130.4, 130.2, 129.7, 128.9, 128.7, 128.3, 128.2, 127.1, 126.8, 126.7, 126.5, 126.2, 126.0, 125.6, 115.8, 115.5, 113.8, 113.6, 81.1, 78.2, 76.7, 71.9, 59.3, 59.0, 56.1, 55.4, 55.32, 55.30, 40.6, 40.5; **HRMS** (ESI) calcd for C<sub>33</sub>H<sub>34</sub>NO<sub>2</sub> [M+H]<sup>+</sup>: 476.2590, found: 476.2604.

***Cis*-*N,N*-dibenzyl-1-(1,1-dimethyl-3-vinylisochroman-4-yl)methanamine (4oa)**

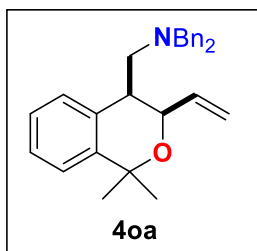

The title compound was prepared according to the general procedure and purified by column chromatography to give colorless oil, 48 mg, 40% yield (combination yield of *cis*- and *trans*-product), 6:1 dr. **<sup>1</sup>H NMR** (400 MHz, CDCl<sub>3</sub>) δ 7.21-7.27 (m, 3H), 7.11-7.19 (m, 10H), 7.00-7.02 (m, 1H), 5.97-6.05 (m, 1H), 5.29-5.33 (m, 1H), 5.18-5.20 (m, 1H), 4.42-4.44 (m, 1H), 3.89 (d, *J* = 14.0 Hz, 2H), 3.33 (d, *J* = 14.0 Hz, 2H), 2.81-2.85 (m, 1H), 2.74 (dd, *J* = 13.2 Hz, 4.4 Hz, 1H), 2.65 (dd, *J* = 12.8 Hz, 10.0 Hz, 1H), 1.42 (s, 3H), 1.09 (s, 3H); **<sup>13</sup>C NMR** (125 MHz, CDCl<sub>3</sub>) δ 142.3, 139.6, 137.9, 137.3, 130.7, 128.7, 128.2, 126.7, 126.6, 125.5, 125.2, 115.2, 76.1, 72.5, 59.2, 55.0, 41.7, 31.3, 28.9; **HRMS** (ESI) calcd for C<sub>28</sub>H<sub>32</sub>NO [M+H]<sup>+</sup>: 398.2484, found: 398.2490.

***Cis*-*N,N*-dibenzyl-1-(3-((*E*)-prop-1-en-1-yl)isochroman-4-yl)methanamine (4qa)**

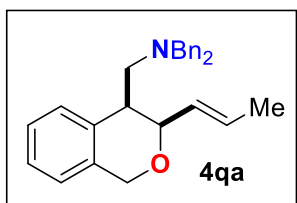

The title compound was prepared according to the general procedure and purified by column chromatography to give colorless oil, 46 mg, 40% yield (combination yield of *cis*- and *trans*-product), > 20:1 dr. **<sup>1</sup>H NMR** (400 MHz, CDCl<sub>3</sub>) δ 7.15-7.29 (m, 13H), 6.93-6.95 (m, 1H), 5.60-5.75 (m, 2H), 4.72-4.82 (m, 2H), 4.26-4.27 (m, 1H), 3.73 (d, *J* = 14.0 Hz, 2H), 3.50 (d, *J* = 14.0 Hz, 2H), 2.85-2.90 (m, 2H), 2.63 (dd, *J* = 14.8 Hz, 9.6 Hz, 1H), 1.76 (d, *J* = 6.4 Hz, 3H); **<sup>13</sup>C NMR** (100 MHz, CDCl<sub>3</sub>) δ 139.4, 137.9, 134.1, 130.1, 129.9, 128.9, 128.2, 127.3, 126.8, 126.4, 125.7, 124.0, 67.9, 58.9, 55.6, 40.8, 18.1; **HRMS** (ESI) calcd for C<sub>27</sub>H<sub>30</sub>NO [M+H]<sup>+</sup>: 384.2327, found: 384.2328.

***(E)*-*N,N*-dibenzyl-4-(1,3-dihydroisobenzofuran-1-yl)but-3-en-1-amine (5aa)**

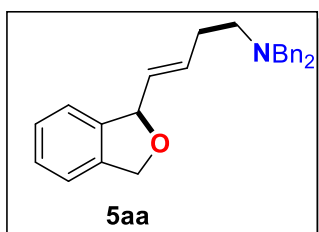

The title compound was prepared according to the general procedure and purified by column chromatography to give colorless oil, 50 mg, 45% yield. **<sup>1</sup>H NMR** (400 MHz, CDCl<sub>3</sub>) δ 7.34-7.36 (m, 4H), 7.19-7.30 (m, 9H), 7.06-7.08 (m, 1H),

5.77-5.84 (m, 1H), 5.51-5.57 (m, 2H), 5.03-5.14 (m, 2H), 3.53-3.61 (m, 4H), 2.57 (t, *J*

= 7.2 Hz, 2H), 2.28-2.34 (m, 2H);  $^{13}\text{C}$  NMR (125 MHz,  $\text{CDCl}_3$ )  $\delta$  141.4, 139.9, 139.3, 132.5, 130.7, 128.9, 128.3, 127.6, 127.4, 126.9, 122.10, 121.06, 85.4, 72.6, 58.3, 53.1, 30.1; **HRMS** (ESI) calcd for  $\text{C}_{26}\text{H}_{28}\text{NO}$   $[\text{M}+\text{H}]^+$ : 370.2171, found: 370.2169.

## 5. Synthetic Transformation of Products

### Gram-scale synthesis of **3aa** and **4aa**

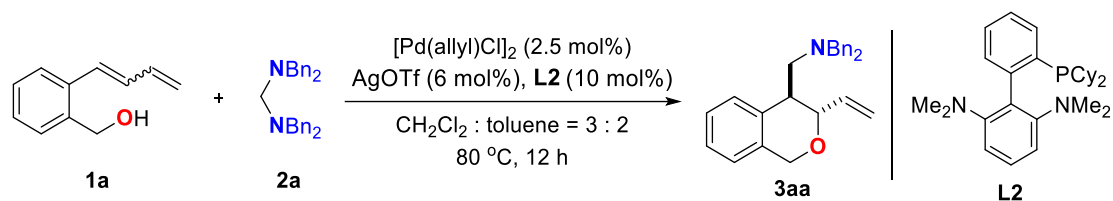

*N,N,N',N'*-tetrabenzylmethanediamine **2a** (1.22 g, 3 mmol),  $[\text{Pd}(\text{allyl})\text{Cl}]_2$  (28 mg, 0.075 mmol), (2-(buta-1,3-dien-1-yl)phenyl)methanol **1a** (0.578 g, 3.6 mmol), AgOTf (46.1 mg, 0.18 mmol), **L2** (131 mg, 0.3 mmol) and solvent ( $\text{CH}_2\text{Cl}_2$  : toluene = 3 : 2, 10 mL) were added to a 100 mL flame-dried Young-type tube under  $\text{N}_2$  atmosphere. The reaction mixture was stirred at 80 °C for 12 hours, and then cooled to room temperature. The solvent was removed under reduced pressure, the residue was purified by flash chromatography (deluted with petroleum ether/ethyl acetate = 100/1 to 20/1) on a silica gel to afford the desired product **3aa** (1.00 g, 90% yield, > 20:1 dr).

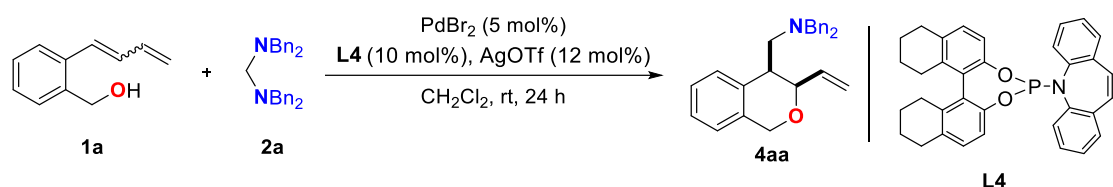

*N,N,N',N'*-tetrabenzylmethanediamine **2a** (2.03 g, 5 mmol),  $\text{PdBr}_2$  (67 mg, 0.25 mmol), (2-(buta-1,3-dien-1-yl)phenyl)methanol **1a** (0.96 g, 6 mmol), AgOTf (154 mg, 0.6 mmol), **L4** (258 mg, 0.5 mmol) and  $\text{CH}_2\text{Cl}_2$  (10 mL) were added to a 100 mL flame-dried Young-type tube under  $\text{N}_2$  atmosphere. The reaction mixture was stirred at room temperature for 24 hours. The solvent was removed under reduced pressure, the residue was purified by flash chromatography (deluted with petroleum ether/ethyl acetate = 100/1 to 20/1) on a silica gel to afford the desired product **4aa** (1.50 g, 82% yield, 14:1 dr).

### Synthetic utility of the product

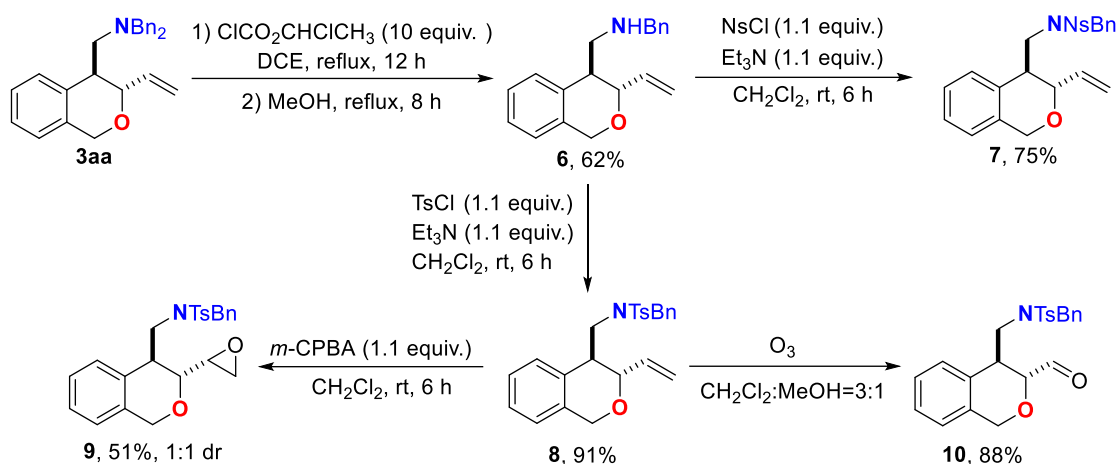

*Trans*-*N,N*-dibenzyl-1-(3-vinylisochroman-4-yl)methanamine **3aa** (738 mg, 2 mmol) was dissolved in DCE (20 mL) and 1-chloroethyl carbonochloridate (2.86 g, 20 mmol) was added dropwise at 0 °C with vigorous stirring<sup>6</sup>. After that, the reaction was refluxed for 24 hours. After evaporation of the solvent under reduced pressure, the mixture was added methanol and refluxed for 12 hours. After evaporation of the solvent under reduced pressure, the residue was dissolved in a mixture of ethyl acetate (10 mL) and quenched with saturated NaHCO<sub>3</sub> (10 mL). The resulting mixture was separated and the aqueous layer was extracted with ethyl acetate (10 mL × 3). The combined organic layers were washed with saturated NaHCO<sub>3</sub> (50 mL) and dried over anhydrous Na<sub>2</sub>SO<sub>4</sub>. After evaporation of the solvent under reduced pressure, the residue was purified by flash column chromatography (deluted with petroleum ether/ethyl acetate = 20/1 to 5/1) on a silica gel to give the desired product **6** (350 mg, 62%).

#### *Trans*-*N*-benzyl-1-(3-vinylisochroman-4-yl)methanamine (**6**)

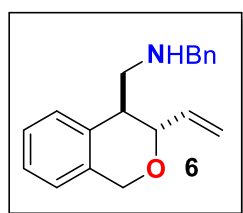

<sup>1</sup>H NMR (500 MHz, CDCl<sub>3</sub>) δ 7.27-7.33 (m, 4H), 7.21-7.24 (m, 2H), 7.13-7.20 (m, 2H), 6.98 (d, *J* = 7.5 Hz, 1H), 5.89-5.96 (m, 1H), 5.27-5.31 (m, 1H), 5.20-5.22 (d, *J* = 10.5 Hz, 1H), 4.74-4.81 (m, 2H), 4.53 (t, *J* = 6.0 Hz, 1H), 3.73-3.79 (m, 2H), 3.07-3.11 (m, 1H), 2.82-2.87 (m, 2H), 1.50 (s, 1H); <sup>13</sup>C NMR (125 MHz, CDCl<sub>3</sub>) δ 140.5, 137.1, 135.3, 134.6, 128.4, 128.2, 128.0, 127.0, 126.9, 126.2, 124.4, 118.3, 76.5, 65.5, 54.1, 51.4, 41.6; HRMS (ESI) calcd for C<sub>19</sub>H<sub>22</sub>NO [M+H]<sup>+</sup>: 280.1701, found: 280.1702.

The mixture of Et<sub>3</sub>N (60.6 mg, 0.6 mmol) and *trans*-*N*-benzyl-1-(3-vinylisochroman-4-yl)methanamine **6** (140 mg, 0.5 mmol) was dissolved in CH<sub>2</sub>Cl<sub>2</sub> (5.0 mL) and NsCl (122 mg, 0.55 mmol) was added under N<sub>2</sub> atmosphere at 0 °C with constantly stirring. After that, the mixture was stirred at room temperature for 4 hours. Water (5 mL) and ethyl acetate (5 mL) were added to this mixture and stirring for 5 minutes, the resulting mixture was separated and the aqueous layer was extracted with ethyl acetate (5 mL × 3). The combined organic layers were washed with brine for 3 times and dried over anhydrous Na<sub>2</sub>SO<sub>4</sub>. After evaporation of the solvent under reduced pressure, the residue was purified by flash column chromatography (deluted with petroleum ether/ethyl acetate = 20/1 to 5/1) on a silica gel to give the desired product **7** (180 mg, 75%).

***Trans*-*N*-benzyl-4-nitro-*N*-((3-vinylisochroman-4-yl)methyl)benzenesulfonamide**

(7)

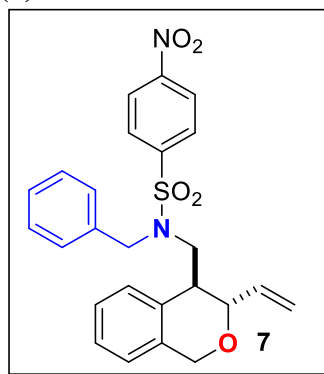

**<sup>1</sup>H NMR** (400 MHz, CDCl<sub>3</sub>) δ 8.27-8.30 (m, 2H), 7.94-7.96 (m, 2H), 7.28-7.30 (m, 3H), 7.21-7.26 (m, 2H), 7.10-7.18 (m, 2H), 6.91-6.96 (m, 2H), 5.69-5.77 (m, 1H), 5.11 (d, *J* = 10.8 Hz, 1H), 5.03 (d, *J* = 17.6 Hz, 1H), 4.74 (d, *J* = 16.0 Hz, 1H), 4.65 (d, *J* = 15.6 Hz, 1H), 4.58 (d, *J* = 14.8 Hz, 1H), 4.45 (dd, *J* = 5.6 Hz, 1.2 Hz, 1H), 4.29 (d, *J* = 15.2

Hz, 1H), 3.79 (dd, *J* = 14.4 Hz, 10.0 Hz, 1H), 3.16 (dd, *J* = 14.0 Hz, 4.8 Hz, 1H), 2.85 (dd, *J* = 10.0 Hz, 4.8 Hz, 1H); **<sup>13</sup>C NMR** (100 MHz, CDCl<sub>3</sub>) δ 150.0, 145.6, 135.5, 135.1, 134.6, 132.3, 129.6, 129.0, 128.6, 128.5, 128.4, 127.1, 126.8, 124.4, 124.3, 119.1, 72.0, 62.3, 54.1, 53.8, 40.0; **HRMS** (ESI) calcd for C<sub>25</sub>H<sub>25</sub>N<sub>2</sub>O<sub>5</sub>S [M+H]<sup>+</sup>: 465.1484, found: 465.1483.

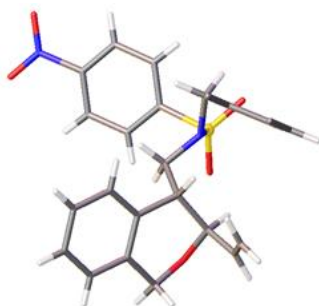

**Figure S2.** The X-ray structure of **7**



The mixture of Et<sub>3</sub>N (35.1 mg, 0.32 mmol) and *Trans-N*-benzyl-1-(3-vinylisochroman-4-yl)methanamine **6** (81 mg, 0.29 mmol) was dissolved in CH<sub>2</sub>Cl<sub>2</sub> (5.0 mL) and TsCl (61.0 mg, 0.32 mmol) was added under N<sub>2</sub> atmosphere at 0 °C with constantly stirring. After that, the mixture was stirred at room temperature for 4 hours. Water (5 mL) and ethyl acetate (5 mL) were added to this mixture and stirring for 5 minutes, the resulting mixture was separated and the aqueous layer was extracted with ethyl acetate (5 mL × 3). The combined organic layers were washed with brine for 3 times and dried over anhydrous Na<sub>2</sub>SO<sub>4</sub>. After evaporation of the solvent under reduced pressure, the residue was purified by flash column chromatography (deluted with petroleum ether/ethyl acetate = 20/1 to 5/1) on a silica gel to give the desired product **8** (115.0 mg, 91%).

***Trans-N*-benzyl-4-methyl-*N*-((3-vinylisochroman-4-yl)methyl)benzenesulfonamide (**8**)**

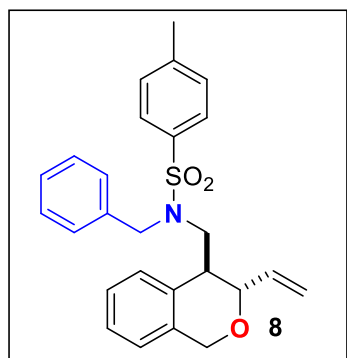

<sup>1</sup>H NMR (500 MHz, CDCl<sub>3</sub>) δ 7.72-7.73 (m, 2H), 7.23-7.30 (m, 7H), 7.09-7.15 (m, 2H), 6.93-6.95 (m, 1H), 6.88-6.90 (m, 1H), 5.67-5.74 (m, 1H), 5.04-5.06 (m, 1H), 4.98 (d, *J* = 17.0 Hz, 1H), 4.71 (d, *J* = 15.5 Hz, 1H), 4.61 (d, *J* = 15.5 Hz, 1H), 4.55 (d, *J* = 15.0 Hz, 1H), 4.48 (dd, *J* = 5.5 Hz, 1.5 Hz, 1H), 4.14 (d, *J* = 15.0 Hz, 1H), 3.71 (dd, *J* = 14.0 Hz, 10.0 Hz, 1H), 3.01 (dd, *J* = 14.0 Hz, 4.5 Hz, 1H), 2.78 (dd, *J* = 10.0 Hz, 4.5 Hz, 1H), 2.42 (s, 3H); <sup>13</sup>C NMR (125 MHz, CDCl<sub>3</sub>) δ 143.5, 136.5, 136.5, 135.4, 134.6, 132.9, 129.9, 129.7, 128.8, 128.7, 128.0, 127.5, 126.8, 126.6, 124.1, 118.6, 72.1, 62.3, 54.5, 53.9, 40.1, 21.6; HRMS (ESI) calcd for C<sub>26</sub>H<sub>28</sub>NO<sub>3</sub>S [M+H]<sup>+</sup>: 434.1790, found: 434.1795.

*Trans-N*-benzyl-4-methyl-*N*-((3-vinylisochroman-4-yl)methyl)benzenesulfonamid **8** (347 mg, 0.80 mmol) was dissolved in CH<sub>2</sub>Cl<sub>2</sub> (5.0 mL) and *m*-CPBA (152 mg, 0.88 mmol) was added under N<sub>2</sub> atmosphere at 0 °C with constantly stirring<sup>7</sup>. After that, the mixture was stirred at room temperature for 4 hours. Water (5 mL) and ethyl acetate (5 mL) were added to this mixture and stirring for 5 minutes, the resulting mixture was separated and the aqueous layer was extracted with ethyl acetate (5 mL × 3). The combined organic layers were washed with brine for 3 times and dried over anhydrous

Na<sub>2</sub>SO<sub>4</sub>. After evaporation of the solvent under reduced pressure, the residue was purified by flash column chromatography (deluted with petroleum ether/ethyl acetate = 20/1 to 5/1) on a silica gel to give the desired product **9** (183 mg, 51%, 1:1 dr).

***Trans*-*N*-benzyl-4-methyl-*N*-((3-(oxiran-2-yl)isochroman-4-yl)methyl)benzenesulfonamide (**9**)**

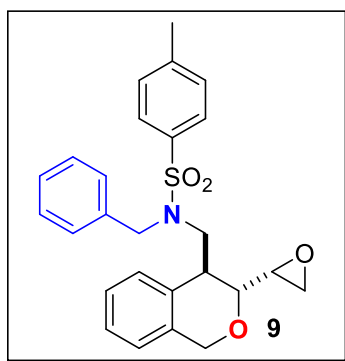

**<sup>1</sup>H NMR** (500 MHz, CDCl<sub>3</sub>) δ 7.71-7.73 (m, 2H), 7.22-7.34 (m, 7H), 7.10-7.18 (m, 2H), 6.88-6.98 (m, 2H), 4.84-4.90 (m, 1H), 4.70 (d, *J* = 15.5 Hz, 1H), 4.45-4.52 (m, 1H), 4.15 (dd, *J* = 14.5 Hz, 7.5 Hz, 1H), 3.59-3.91 (m, 2H), 2.96-3.02 (m 1H), 2.87-2.93 (m, 1H), 2.78 (dd, *J* = 10.0 Hz, 4.0 Hz, 0.50H), 2.64 (dd, *J* = 10.5 Hz, 4.5 Hz, 0.50H), 2.55-2.58 (m, 1H), 2.42 (s, 3H), 2.32 (dd, *J* = 5.0 Hz, 2.5 Hz, 0.50H), 2.16 (dd, *J* = 5.0 Hz, 2.5 Hz, 0.50H); **<sup>13</sup>C NMR** (125 MHz, CDCl<sub>3</sub>) δ 143.65, 143.56, 136.3, 136.13, 136.11, 134.3, 134.0, 132.6, 132.3, 130.0, 129.9, 129.8, 129.4, 129.3, 129.0, 128.82, 128.76, 128.1, 127.4, 127.0, 126.89, 126.87, 126.7, 124.4, 124.2, 73.4, 72.5, 63.8, 63.3, 54.5, 54.3, 53.8, 53.6, 51.6, 50.8, 45.2, 44.3, 38.4, 37.3, 21.6; **HRMS** (ESI) calcd for C<sub>26</sub>H<sub>28</sub>NO<sub>4</sub>S [M+H]<sup>+</sup>: 450.1739, found: 450.1739.

*Trans*-*N*-benzyl-4-methyl-*N*-((3-vinylisochroman-4-yl)methyl)benzenesulfonamid **8** (87 mg, 0.2 mmol) was dissolved in solvent (CH<sub>2</sub>Cl<sub>2</sub> / MeOH = 3 : 1, 2.0 mL) and O<sub>3</sub> was bubbled at -78 °C with constantly stirring for 6 minutes<sup>8</sup>. After that, the mixture of Me<sub>2</sub>S / H<sub>2</sub>O = 1 : 1 (1 mL) was added at -78 °C and then stirred at room temperature for 1 hour. Water (5 mL) and CH<sub>2</sub>Cl<sub>2</sub> (5 mL) were added to this mixture and stirring for 5 minutes, the resulting mixture was separated and the aqueous layer was extracted with CH<sub>2</sub>Cl<sub>2</sub> (5 mL × 3). The combined organic layers were washed with brine for 3 times and dried over anhydrous Na<sub>2</sub>SO<sub>4</sub>. After evaporation of the solvent under reduced pressure, the residue was purified by flash column chromatography (deluted with petroleum ether/ethyl acetate = 30/1 to 10/1) on a silica gel to give the desired product **10** (77 mg, 88%).

**Trans-N-benzyl-N-((3-formylisochroman-4-yl)methyl)-4-methylbenzenesulfonamide (10)**

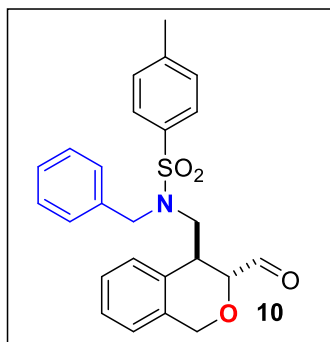

**<sup>1</sup>H NMR** (400 MHz, CDCl<sub>3</sub>) δ 9.39 (s, 1H), 7.72-7.74 (m, 2H), 7.25-7.34 (m, 7H), 7.08-7.15 (m, 2H), 6.87-6.90 (m, 2H), 5.04 (d, *J* = 16.0 Hz, 1H), 4.77 (d, *J* = 15.6 Hz, 1H), 4.62 (d, *J* = 14.4 Hz, 1H), 4.51 (d, *J* = 1.2 Hz, 1H), 4.12 (d, *J* = 14.4 Hz, 1H), 3.71 (dd, *J* = 14.0 Hz, 10.8 Hz, 1H), 3.16 (dd, *J* = 10.4 Hz, 4.0 Hz, 1H), 3.01 (dd, *J* = 14.0 Hz, 4.4

Hz, 1H), 2.42 (s, 3H); **<sup>13</sup>C NMR** (100 MHz, CDCl<sub>3</sub>) δ 201.4, 143.7, 136.0, 135.8, 133.4, 130.8, 129.8, 129.0, 128.8, 128.7, 128.6, 128.2, 127.3, 126.8, 124.3, 76.7, 64.5, 54.3, 53.0, 35.9, 21.5; **HRMS** (ESI) calcd for C<sub>25</sub>H<sub>26</sub>NO<sub>4</sub>S [M+H]<sup>+</sup>: 436.1583, found: 436.1574.

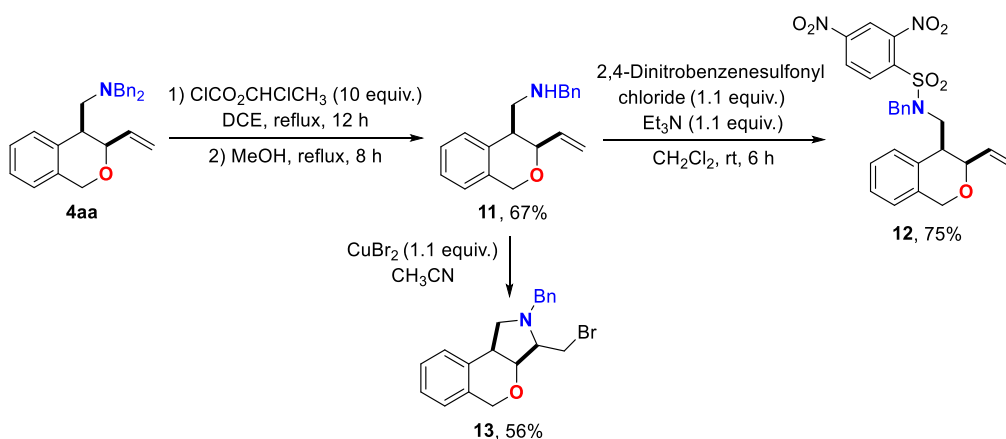

*Cis*-*N,N*-dibenzyl-1-(3-vinylisochroman-4-yl)methanamine **4aa** (738 mg, 2 mmol) was dissolved in DCE (20 mL) and 1-chloroethyl carbonochloridate (2.86 g, 20 mmol) was added dropwise at 0 °C with vigorous stirring<sup>6</sup>. After that, the reaction was refluxed for 24 hours. After evaporation of the solvent under reduced pressure, the mixture was added methanol and refluxed for 12 hours. The solvent was removed under reduced pressure, the residue was dissolved in a mixture of ethyl acetate (10 mL) and quenched with saturated NaHCO<sub>3</sub> (10 mL). The resulting mixture was separated and the aqueous layer was extracted with ethyl acetate (10 mL × 3). The combined organic layers were washed with saturated NaHCO<sub>3</sub> (50 mL) and dried over anhydrous Na<sub>2</sub>SO<sub>4</sub>. After evaporation of the solvent under reduced pressure, the residue was purified by flash

column chromatography (deluted with petroleum ether/ethyl acetate = 20/1 to 5/1) on a silica gel to give the desired product **11** (374 mg, 67%).

***Cis-N-benzyl-1-(3-vinylisochroman-4-yl)methanamine (11)***

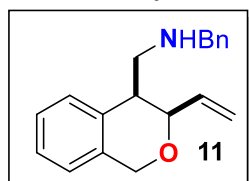

**<sup>1</sup>H NMR** (400 MHz, CDCl<sub>3</sub>) δ 7.19-7.31 (m, 8H), 7.02-7.04 (m, 1H), 5.97-6.05 (m, 1H), 5.40-5.44 (m, 1H), 5.23-5.26 (m, 1H), 4.99 (d, *J* = 15.6 Hz, 1H), 4.90 (d, *J* = 15.2 Hz, 1H), 4.34-4.36 (m, 1H), 3.77 (d, *J* = 13.6 Hz, 1H), 3.70 (d, *J* = 13.2 Hz, 1H), 3.05 (dd, *J* = 11.6 Hz, 5.2 Hz, 1H), 2.90-2.93 (m, 1H), 2.83 (dd, *J* = 11.6 Hz, 6.4 Hz, 1H), 1.73 (br, 1H); **<sup>13</sup>C NMR** (125 MHz, CDCl<sub>3</sub>) δ 140.5, 136.9, 136.7, 134.6, 129.3, 128.4, 128.1, 126.9, 126.7, 126.5, 124.3, 115.6, 77.3, 68.4, 54.2, 50.8, 41.9; **HRMS** (ESI) calcd for C<sub>19</sub>H<sub>22</sub>NO [M+H]<sup>+</sup>: 280.1701, found: 280.1703.

The mixture of Et<sub>3</sub>N (44 mg, 0.43 mmol) and *cis-N*-benzyl-1-(3-vinylisochroman-4-yl)methanamine **11** (100 mg, 0.36 mmol) was dissolved in CH<sub>2</sub>Cl<sub>2</sub> (5.0 mL) and 2,4-Dinitrobenzenesulfonyl chloride (115 mg, 0.43 mmol) was added under N<sub>2</sub> atmosphere at 0 °C with constantly stirring. After that, the mixture was stirred at room temperature for 4 hours. Water (5 mL) and ethyl acetate (5 mL) were added to this mixture and stirring for 5 minutes, the resulting mixture was separated and the aqueous layer was extracted with ethyl acetate (5 mL × 3). The combined organic layers were washed with brine for 3 times and dried over anhydrous Na<sub>2</sub>SO<sub>4</sub>. After evaporation of the solvent under reduced pressure, the residue was purified by flash column chromatography (deluted with petroleum ether/ethyl acetate = 20/1 to 5/1) on a silica gel to give the desired product **12** (138 mg, 75%).

***Cis-N-benzyl-2,4-dinitro-N-((3-vinylisochroman-4-yl)methyl)benzenesulfonamide (12)***

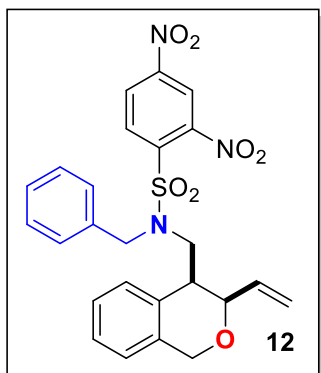

**<sup>1</sup>H NMR** (500 MHz, CDCl<sub>3</sub>) δ 8.31 (d, *J* = 2.0 Hz, 1H ), 8.05 (dd, *J* = 8.5 Hz, 2.0 Hz, 1H), 7.67 (d, *J* = 8.5 Hz, 1H), 7.26-7.28 (m, 3H), 7.13-7.17 (m, 3H), 7.02 (t, *J* = 7.5 Hz, 1H), 6.83-6.89 (m, 2H), 5.69-5.75 (m, 1H), 5.29-5.33 (m, 1H), 5.14-5.16 (m, 1H), 4.82-4.92 (m, 2H), 4.62 (d, *J* = 16.0 Hz, 1H ), 4.45 (d, *J* = 15.5 Hz, 1H ), 4.26-4.28 (m, 1H), 3.56-3.68 (m, 2H), 3.03-3.05 (m, 1H); **<sup>13</sup>C NMR** (125 MHz, CDCl<sub>3</sub>) δ 149.2, 147.4, 139.4, 135.2, 134.9, 134.6, 134.1, 132.1, 130.0, 129.0, 128.7, 128.4, 127.3, 126.2, 125.8, 124.3, 119.5, 116.3, 76.2, 68.3, 52.5, 49.0, 39.4; **HRMS** (ESI) calcd for C<sub>25</sub>H<sub>24</sub>N<sub>3</sub>O<sub>7</sub>S [M+H]<sup>+</sup>: 510.1335, found: 510.1324.

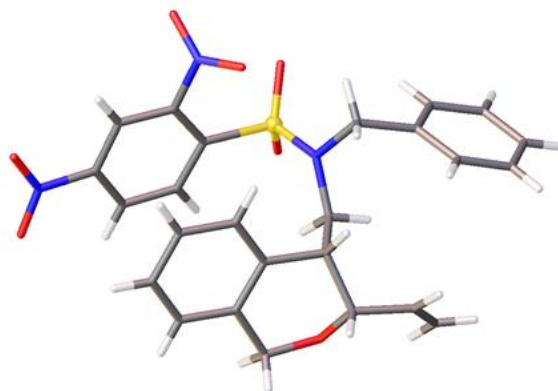

**Figure S3.** The X-ray structure of **12**.

*Cis-N*-benzyl-1-(3-vinylisochroman-4-yl)methanamine **10** (56 mg, 0.20 mmol) was dissolved in CH<sub>3</sub>CN (5.0 mL), the mixture was added CuBr<sub>2</sub> (45 mg, 0.20 mmol) at room temperature with constantly stirring. After that, the mixture was stirred at room temperature for 6 hours. Water (5 mL) and ethyl acetate (5 mL) were added to this mixture and stirring for 5 minutes, the resulting mixture was separated and the aqueous layer was extracted with ethyl acetate (5 mL × 3). The combined organic layers were washed with brine for 3 times and dried over anhydrous Na<sub>2</sub>SO<sub>4</sub>. After evaporation of the solvent under reduced pressure, the residue was purified by flash column chromatography (deluted with petroleum ether/ethyl acetate = 100/1 to 20/1) on a silica gel to give the desired product **13** (40 mg, 56%)<sup>9</sup>.

**2-benzyl-3-(bromomethyl)-1,2,3,3a,5,9b-hexahydroisochromeno[3,4-c]pyrrole (13)**

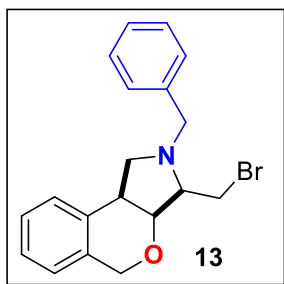

**<sup>1</sup>H NMR** (400 MHz, CDCl<sub>3</sub>) δ 7.24-7.34 (m, 5H), 7.13-7.21 (m, 2H), 7.00-7.05 (m, 2H), 5.03 (d, *J* = 15.2 Hz, 1H), 4.88 (d, *J* = 15.2 Hz, 1H), 4.33-4.38 (m, 1H), 3.93 (s, 1H), 3.51-3.59 (m, 2H), 2.97-3.02 (m, 2H), 2.82 (dd, *J* = 11.2 Hz, 4.0 Hz, 1H), 2.69 (t, *J* = 11.2 Hz, 1H), 2.43 (t, *J* = 11.6 Hz, 1H); **<sup>13</sup>C NMR**

(100 MHz, CDCl<sub>3</sub>) δ 137.8, 134.9, 134.4, 129.1, 128.7, 128.5, 127.4, 127.0, 126.7, 124.3, 74.0, 68.7, 62.1, 55.4, 55.0, 49.4, 40.2; **HRMS** (ESI) calcd for C<sub>19</sub>H<sub>21</sub>BrNO [M+H]<sup>+</sup>: 358.0807, found: 358.0815.

## 6. Catalytic Asymmetric Reactions with Chiral L4

### 7.1 The general procedure for the asymmetric reactions

#### Method C:

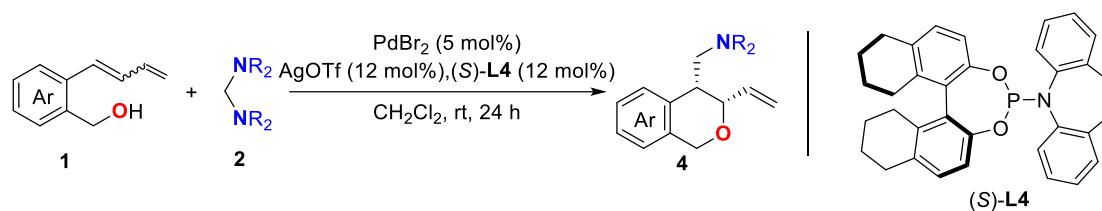

In a glove box, the mixture of PdBr<sub>2</sub> (4.0 mg, 0.015 mmol), (S)-L4 (18.5 mg, 0.036 mmol), AgOTf (9.3 mg, 0.036 mmol) and CH<sub>2</sub>Cl<sub>2</sub> (1 mL) was added to a Young-type tube and stirred at 45 °C for 30 minutes. After the mixture was cooled to room temperature, *N,N,N',N'*-tetrabenzylmethanediamine **2** (0.3 mmol) and **1** (0.36 mmol) were added under nitrogen atmosphere. The reaction mixture was degassed via the freeze-thaw method and stirred at room temperature for 24 hours. The solvent was evaporated under reduced pressure and the residue was purified by flash column chromatography (eluted with petroleum ether/diethyl ether = 200/1 to 50/1) on a silica gel to give the desired chiral product **4**. The dr value of the crude reaction mixture was determined by <sup>1</sup>HNMR analysis. The ee value was determined by HPLC with chiral column.

#### Method D:

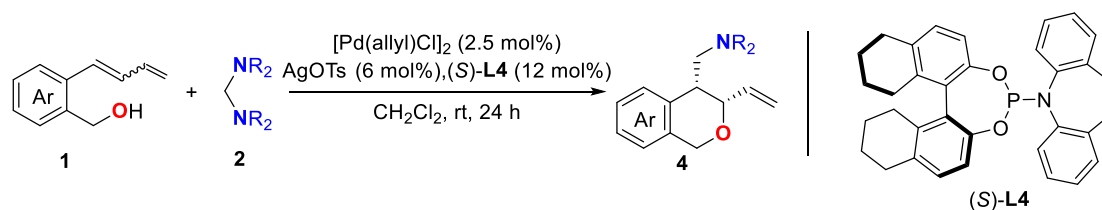

In a glove box, the mixture of [Pd(allyl)Cl]<sub>2</sub> (2.8 mg, 0.0075 mmol), (S)-L4 (18.5 mg, 0.036 mmol), AgOTs (5.0 mg, 0.018 mmol) and CH<sub>2</sub>Cl<sub>2</sub> (1 mL) was added to a Young-type tube and stirred at 45 °C for 30 minutes. After the mixture was cooled to room temperature, *N,N,N',N'*-tetrabenzylmethanediamine **2** (0.3 mmol) and **1** (0.36 mmol) were added under nitrogen atmosphere. The reaction mixture was degassed via the freeze-thaw method and stirred at room temperature for 24 hours. The solvent was evaporated under reduced pressure and the residue was purified by flash column chromatography (eluted with petroleum ether/diethyl ether = 200/1 to 50/1) on a silica gel to give the desired chiral product **4**. The dr value of the crude reaction mixture was

determined by <sup>1</sup>HNMR analysis. The ee value was determined by HPLC with chiral column.

***Cis-N,N*-dibenzyl-1-((3*S*,4*R*)-3-vinylisochroman-4-yl)methanamine (4aa)**

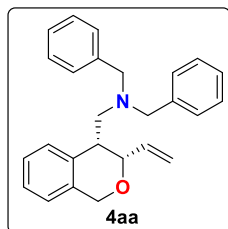

The title compound was prepared according to the general procedure by using (*S*)-**L4** as ligand and purified by column chromatography to give colorless oil. (**Method C**: 96 mg, 87% yield, 14:1 dr; **Method D**: 43 mg, 39% yield, dr = 12 : 1). The spectral data of **4aa** was consistent with spectral data from the general method preparation. The ee was determined to be (**Method C**: 74% ee, **Method D**: 92% ee) [Determined by HPLC with a Chiralpak AD-H column (90 : 10 = Hexane : isopropanol, 0.5 mL / min, 220 nm, 25 °C); t (major) = 7.8 min, t (minor) = 8.4 min.  $[\alpha]_D^{20} = 45.4$  (CHCl<sub>3</sub>, c 0.88)].

***Cis-N,N*-bis(4-methylbenzyl)-1-((3*S*,4*R*)-3-vinylisochroman-4-yl)methanamine (4ab)**

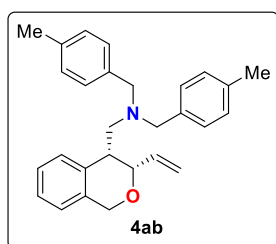

The title compound was prepared according to the general procedure by using (*S*)-**L4** as ligand and purified by column chromatography to give colorless oil. (**Method C**: 91 mg, 76% yield, 15:1 dr; **Method D**: 43 mg, 36% yield, 13:1 dr). The spectral data of **4ab** was consistent with spectral data from the general method preparation. The ee was determined to be (**Method C**: 67% ee, **Method D**: 85% ee) [Determined by HPLC with a Chiralpak AD-H column (98 : 2 = Hexane : isopropanol, 0.7 mL / min, 254 nm, 25 °C); t (major) = 7.0 min, t (minor) = 8.2 min.  $[\alpha]_D^{20} = 55.6$  (CHCl<sub>3</sub>, c 0.51)].

***Cis-N,N*-bis(4-(*tert*-butyl)benzyl)-1-((3*S*,4*R*)-3-vinylisochroman-4-yl)methanamine (4ac)**

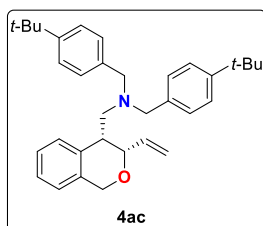

The title compound was prepared according to the general procedure by using (*S*)-**L4** as ligand and purified by column chromatography to give colorless oil. (**Method C**: 96 mg, 64% yield, 14:1 dr; **Method D**: 46 mg, 32% yield, 13:1 dr). The spectral data of **4ac** was consistent with spectral data from the general method preparation. The ee was determined to be (**Method C**: 73% ee, **Method**



**D:** 89% ee) [Determined by HPLC with a Chiralcel OD-H column (99.5 : 0.5 = Hexane : isopropanol, 1.0 mL / min, 254 nm, 25 °C); t (major) = 12.1 min, t (minor) = 13.9 min.  $[\alpha]_D^{20} = 49.6$  (CHCl<sub>3</sub>, c 0.38)].

***Cis-N,N*-dibenzyl-1-((3*S*,4*R*)-6,7-dimethoxy-3-vinylisochroman-4-yl)methanamine (4fa)**

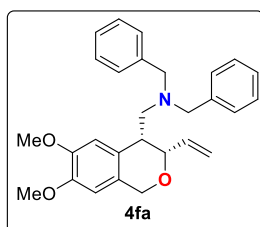

The title compound was prepared according to the general procedure by using (*S*)-**L4** as ligand and purified by column chromatography to give colorless oil. (**Method C:** 117 mg, 91% yield, 6:1 dr; **Method D:** 48 mg, 37% yield, 10:1 dr). The spectral data of **4ad** was consistent with spectral data from the

general method preparation. The ee was determined to be (**Method C:** 79% ee, **Method D:** 92% ee) [Determined by HPLC with a Chiralpak AD-H column (90 : 10 = Hexane : isopropanol, 1.0 mL / min, 254 nm, 25 °C); t (minor) = 9.3 min, t (major) = 17.1 min.  $[\alpha]_D^{20} = 21.4$  (CHCl<sub>3</sub>, c 0.44)].

***Cis-N,N*-dibenzyl-1-((3*S*,4*R*)-7-fluoro-3-vinylisochroman-4-yl)methanamine (4ga)**

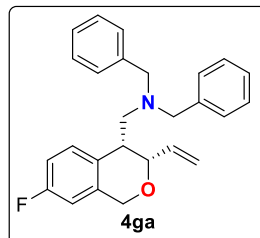

The title compound was prepared according to the general procedure by using (*S*)-**L4** as ligand and purified by column chromatography to give colorless oil. (**Method C:** 89 mg, 77% yield, 10:1 dr; **Method D:** 36 mg, 31% yield, 6:1 dr). The spectral data of **4ga** was consistent with spectral data from the general method preparation. The ee was determined to be

(**Method C:** 84% ee, **Method D:** 94% ee) [Determined by HPLC with a Chiralpak AD-H column (98 : 2 = Hexane : isopropanol, 0.7 mL / min, 220 nm, 25 °C); t (major) = 8.2 min, t (minor) = 9.9 min.  $[\alpha]_D^{20} = 63.8$  (CHCl<sub>3</sub>, c 0.34)].

***Cis-N*-benzyl-2,4-dinitro-*N*-(((3*S*,4*R*)-3-vinylisochroman-4-yl)methyl)benzenesulfonamide (4ka)**

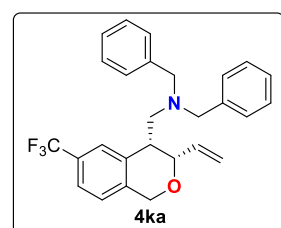

The title compound was prepared according to the general procedure by using (*S*)-**L4** as ligand and purified by column chromatography to give colorless oil. (**Method C:** 101 mg, 77% yield, > 20:1 dr; **Method D:** 88 mg, 67% yield, > 20:1 dr). The spectral data of **4aa** was consistent with spectral data from the

general method preparation. The ee was determined to be (**Method C**: 93% ee, **Method D**: 94% ee) [Determined by HPLC with a Chiralcel OD-H column (98 : 2 = Hexane : isopropanol, 1.0 mL / min, 254 nm, 25 °C); t (minor) = 5.1 min, t (major) = 6.0 min.  $[\alpha]_D^{20} = 75.8$  (CHCl<sub>3</sub>, c 0.81)].

## 7.2 Determination of the Absolute Stereochemistry:

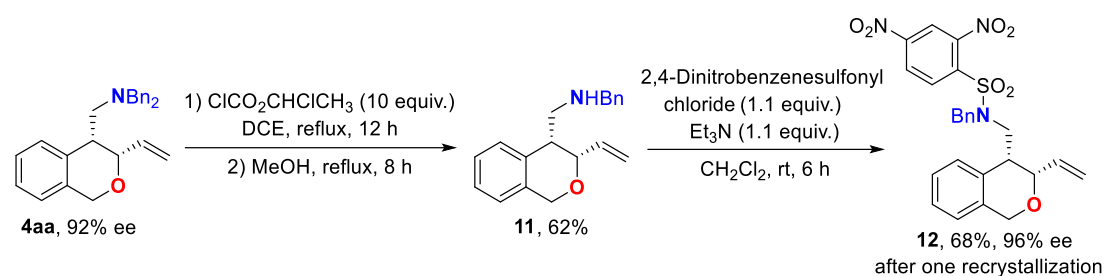

*N,N*-dibenzyl-1-((3*S*,4*R*)-3-vinylisochroman-4-yl)methanamine **4aa** (256 mg, 0.69 mmol) was dissolved in DCE (10 mL) and 1-chloroethyl carbonochloridate (0.99 g, 6.9 mmol) was added dropwise at 0 °C with vigorous stirring<sup>6</sup>. After that, the reaction was refluxed for 24 hours. After evaporation of the solvent under reduced pressure, the residue was dissolved in a mixture of ethyl acetate (5 mL) and quenched with saturated NaHCO<sub>3</sub> (5 mL). The resulting mixture was separated and the aqueous layer was extracted with ethyl acetate (5 mL × 3). The combined organic layers were washed with saturated NaHCO<sub>3</sub> (50 mL) and dried over anhydrous Na<sub>2</sub>SO<sub>4</sub>. After evaporation of the solvent under reduced pressure, the residue was purified by flash column chromatography (petroleum ether/ethyl acetate = 20/1 to 5/1) to give the desired chiral product **11** (119 mg, 62%).

The mixture of Et<sub>3</sub>N (44 mg, 0.43 mmol) and *N*-benzyl-1-((3*S*,4*R*)-3-vinylisochroman-4-yl)methanamine **11** (100 mg, 0.36 mmol) was dissolved in CH<sub>2</sub>Cl<sub>2</sub> (5.0 mL) and 2,4-dinitrobenzenesulfonyl chloride (115 mg, 0.43 mmol) was added under N<sub>2</sub> atmosphere at 0 °C with constantly stirring. After that, the mixture was stirred at room temperature for 4 hours. Water (5 mL) and ethyl acetate (5 mL) were added to this mixture and stirring for 5 minutes, the resulting mixture was separated and the aqueous layer was extracted with ethyl acetate (5 mL × 3). The combined organic layers were washed with brine for 3 times and dried over anhydrous Na<sub>2</sub>SO<sub>4</sub>. After evaporation of the solvent under reduced pressure, the residue was purified by flash column chromatography (deluted with petroleum ether/ethyl acetate = 20/1 to 5/1) on

a silica gel to give the desired chiral product **12** (125 mg, 68%). The ee was determined to be 96% ee (after one recrystallization) [Determined by HPLC with a Chiralpak AD-H column (90 : 10 = Hexane : isopropanol, 1.0 mL / min, 254 nm, 25 °C); t (minor) = 32.9 min, t (major) = 34.5 min.  $[\alpha]_D^{20} = -11.6$  (CHCl<sub>3</sub>, c 0.90).

As shown below, we have determined the absolute stereochemistry of chiral product **4aa** by X-ray diffraction of the derivative chiral compound **12**. By analogy, the other cyclization products were assigned as (3*S*,4*R*) tentatively as well.

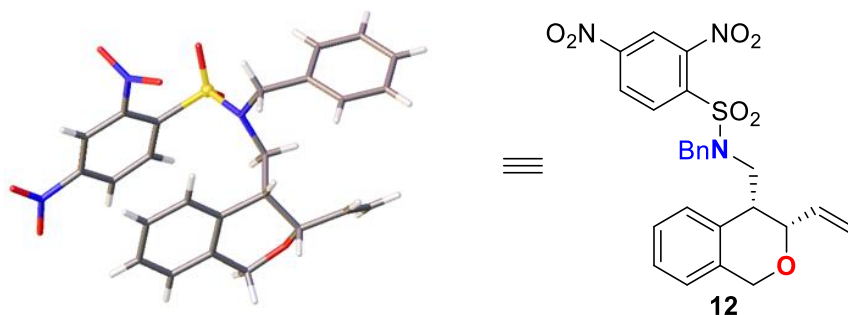

**Figure S4.** X-ray structure of (3*S*,4*R*)-**12**

## 7. Copies of HPLC of products

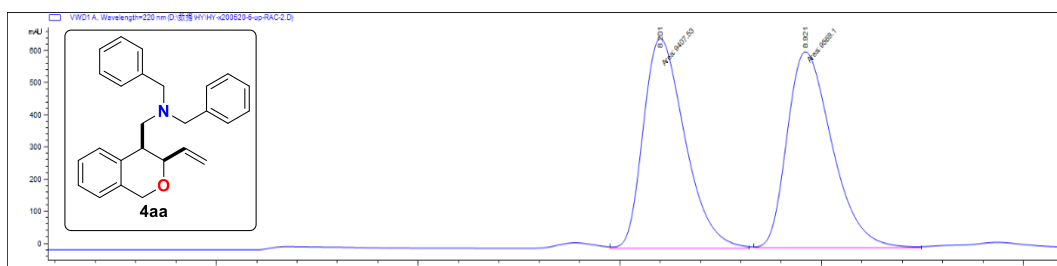

| Peak # | RetTime [min] | Type | Width [min] | Area [mAU*s] | Height [mAU] | Area %  |
|--------|---------------|------|-------------|--------------|--------------|---------|
| 1      | 8.201         | FM   | 0.2396      | 9407.53223   | 654.49213    | 49.5743 |
| 2      | 8.921         | MF   | 0.2604      | 9569.09766   | 612.49451    | 50.4257 |

Totals : 1.89766e4 1266.98663

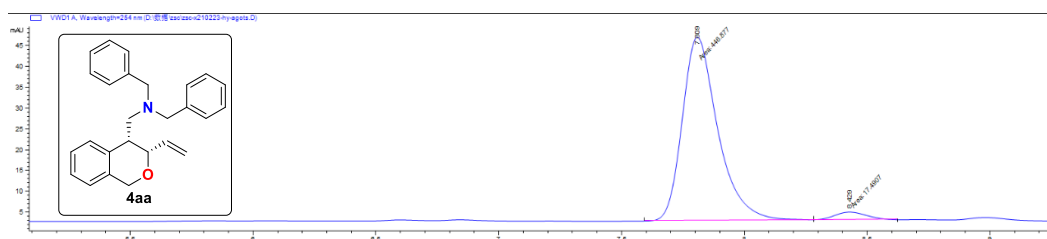

| Peak # | RetTime [min] | Type | Width [min] | Area [mAU*s] | Height [mAU] | Area %  |
|--------|---------------|------|-------------|--------------|--------------|---------|
| 1      | 7.809         | MF   | 0.1680      | 446.87747    | 44.34336     | 96.2334 |
| 2      | 8.429         | FM   | 0.1537      | 17.49071     | 1.89647      | 3.7666  |

Totals : 464.36818 46.23982

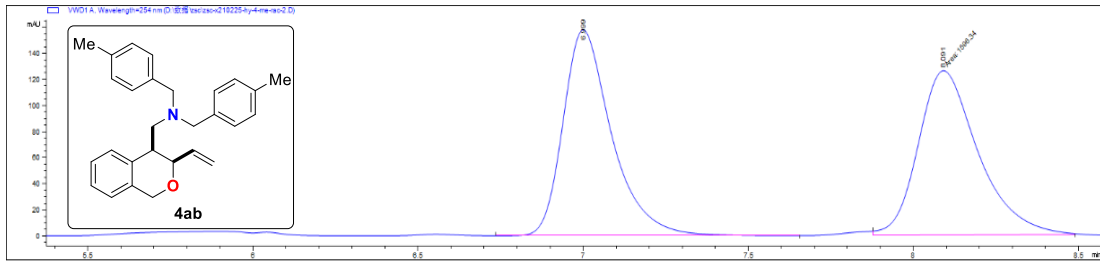

| Peak # | RetTime [min] | Type | Width [min] | Area [mAU*s] | Height [mAU] | Area %  |
|--------|---------------|------|-------------|--------------|--------------|---------|
| 1      | 6.999         | BB   | 0.1537      | 1615.41113   | 157.40831    | 50.2968 |
| 2      | 8.091         | MM   | 0.2114      | 1596.34375   | 125.83637    | 49.7032 |

Totals : 3211.75488 283.24468

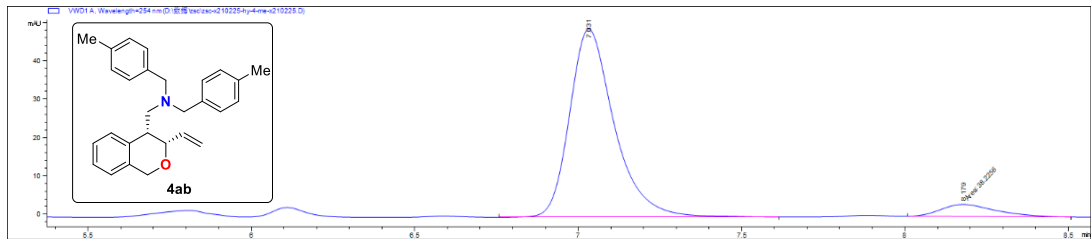

| Peak # | RetTime [min] | Type | Width [min] | Area [mAU*s] | Height [mAU] | Area %  |
|--------|---------------|------|-------------|--------------|--------------|---------|
| 1      | 7.031         | BB   | 0.1431      | 466.52808    | 49.00911     | 92.4269 |
| 2      | 8.179         | MM   | 0.1991      | 38.22557     | 3.19962      | 7.5731  |

Totals : 504.75365 52.20873

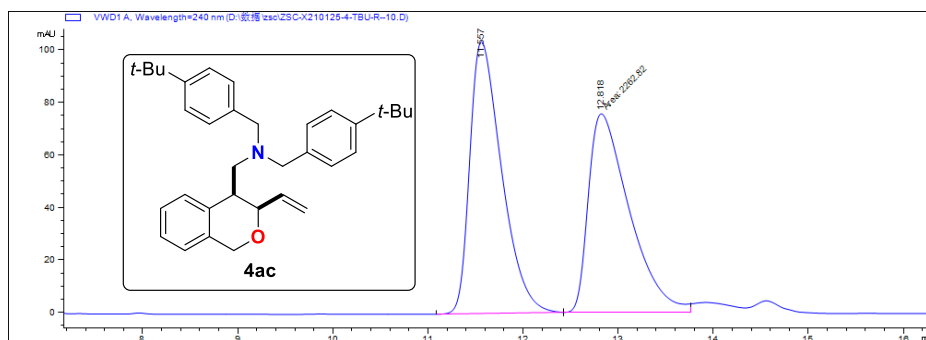

| Peak # | RetTime [min] | Type | Width [min] | Area [mAU*s] | Height [mAU] | Area %  |
|--------|---------------|------|-------------|--------------|--------------|---------|
| 1      | 11.557        | BB   | 0.3544      | 2401.69873   | 103.23074    | 51.4886 |
| 2      | 12.818        | MF   | 0.5002      | 2262.82471   | 75.40160     | 48.5114 |

Totals : 4664.52344 178.63233

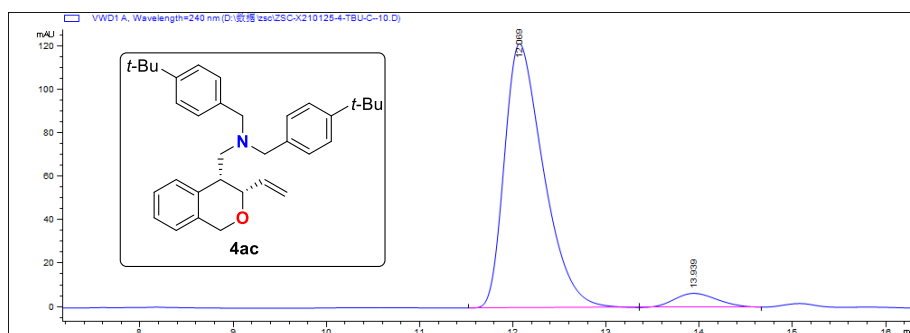

| Peak # | RetTime [min] | Type | Width [min] | Area [mAU*s] | Height [mAU] | Area %  |
|--------|---------------|------|-------------|--------------|--------------|---------|
| 1      | 12.069        | BB   | 0.4423      | 3543.88965   | 121.85902    | 94.5114 |
| 2      | 13.939        | BB   | 0.4977      | 205.80540    | 6.42545      | 5.4886  |

Totals : 3749.69505 128.28447

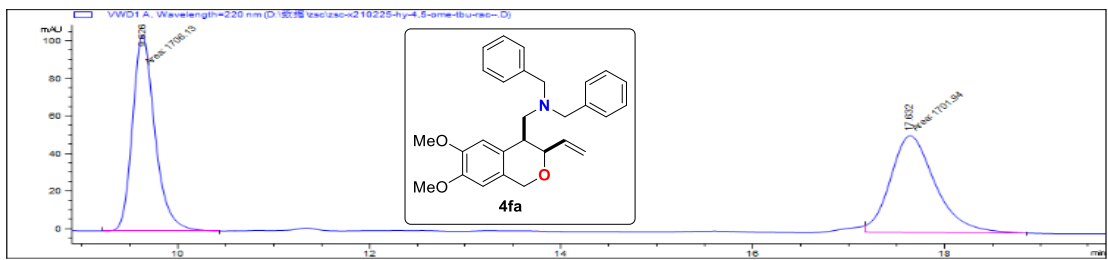

| Peak #   | RetTime [min] | Type | Width [min] | Area [mAU*s] | Height [mAU] | Area %  |
|----------|---------------|------|-------------|--------------|--------------|---------|
| 1        | 9.626         | MM   | 0.2724      | 1706.13293   | 104.39068    | 50.0615 |
| 2        | 17.632        | FM   | 0.5470      | 1701.94202   | 51.86120     | 49.9385 |
| Totals : |               |      |             | 3408.07495   | 156.25188    |         |

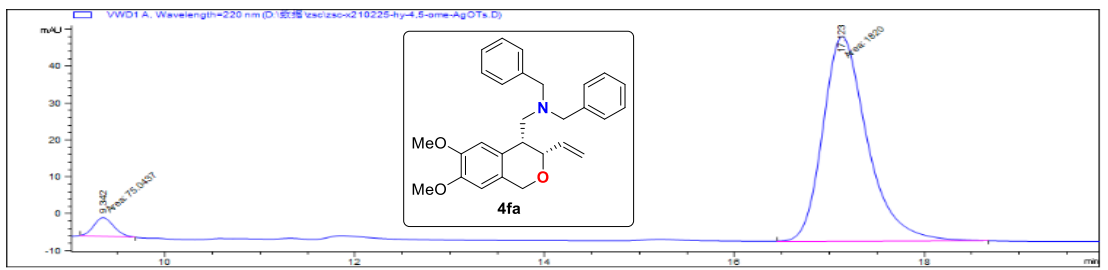

| Peak #   | RetTime [min] | Type | Width [min] | Area [mAU*s] | Height [mAU] | Area %  |
|----------|---------------|------|-------------|--------------|--------------|---------|
| 1        | 9.342         | MM   | 0.2463      | 75.04367     | 5.07762      | 3.9600  |
| 2        | 17.123        | MM   | 0.5452      | 1820.00220   | 55.63900     | 96.0400 |
| Totals : |               |      |             | 1895.04587   | 60.71662     |         |

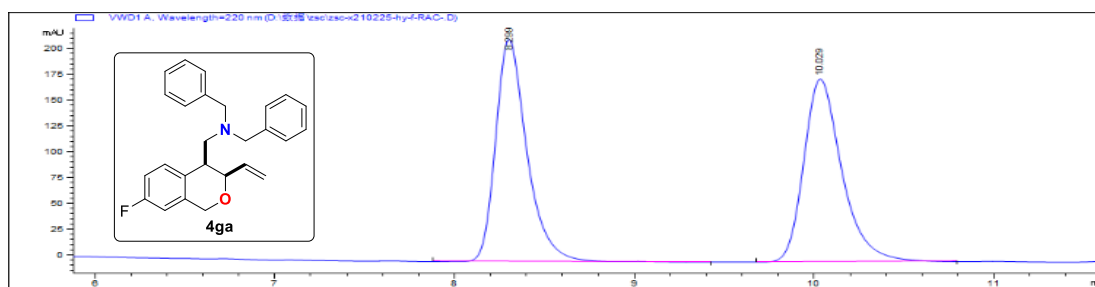

| Peak # | RetTime [min] | Type | Width [min] | Area [mAU*s] | Height [mAU] | Area %  |
|--------|---------------|------|-------------|--------------|--------------|---------|
| 1      | 8.299         | BV R | 0.1835      | 2610.06250   | 215.21078    | 49.9977 |
| 2      | 10.029        | BB   | 0.2241      | 2610.30225   | 176.90424    | 50.0023 |

Totals : 5220.36475 392.11502

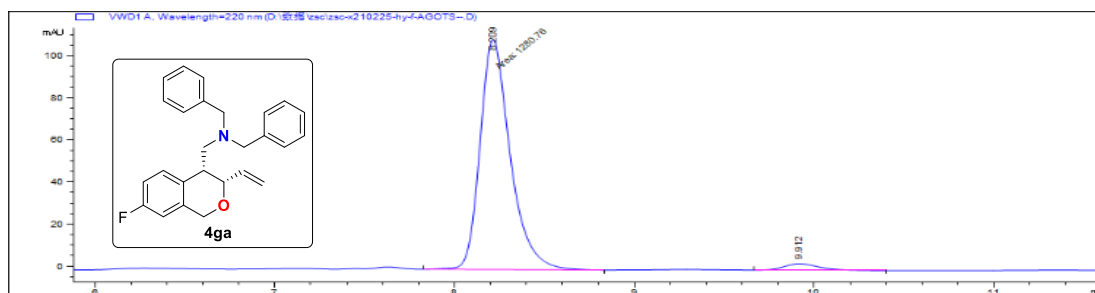

| Peak # | RetTime [min] | Type | Width [min] | Area [mAU*s] | Height [mAU] | Area %  |
|--------|---------------|------|-------------|--------------|--------------|---------|
| 1      | 8.209         | FM   | 0.1951      | 1280.76013   | 109.40417    | 96.8627 |
| 2      | 9.912         | BB   | 0.2062      | 41.48204     | 3.05896      | 3.1373  |

Totals : 1322.24218 112.46314



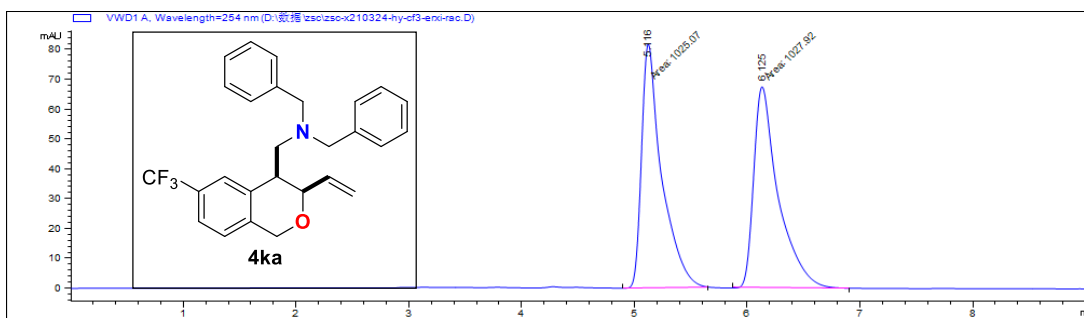

| Peak # | RetTime [min] | Type | Width [min] | Area [mAU*s] | Height [mAU] | Area %  |
|--------|---------------|------|-------------|--------------|--------------|---------|
| 1      | 5.116         | MF   | 0.2080      | 1025.06555   | 82.12666     | 49.9304 |
| 2      | 6.125         | MF   | 0.2527      | 1027.92224   | 67.78989     | 50.0696 |

Totals : 2052.98779 149.91656

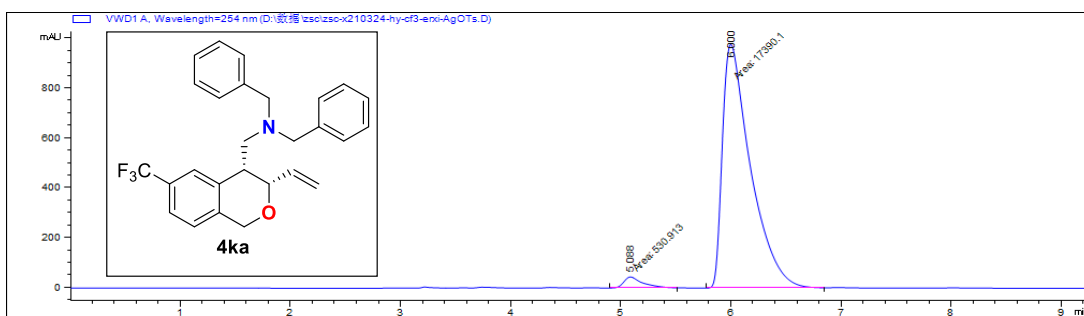

| Peak # | RetTime [min] | Type | Width [min] | Area [mAU*s] | Height [mAU] | Area %  |
|--------|---------------|------|-------------|--------------|--------------|---------|
| 1      | 5.088         | MM   | 0.1997      | 530.91290    | 44.30978     | 2.9625  |
| 2      | 6.000         | MM   | 0.2960      | 1.73901e4    | 979.20825    | 97.0375 |

Totals : 1.79210e4 1023.51803

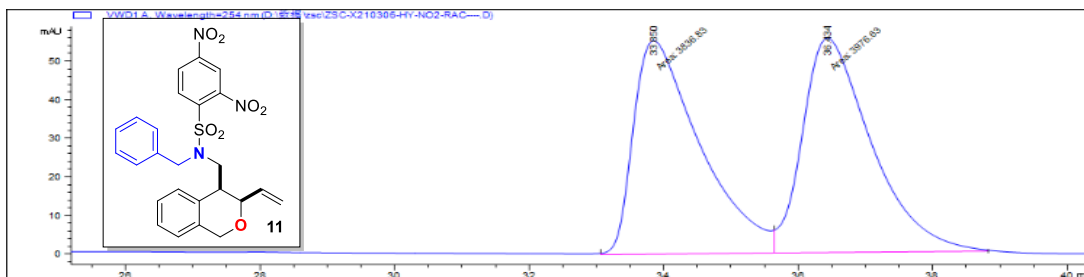

| Peak # | RetTime [min] | Type | Width [min] | Area [mAU*s] | Height [mAU] | Area %  |
|--------|---------------|------|-------------|--------------|--------------|---------|
| 1      | 33.850        | MF   | 1.1524      | 3836.83496   | 55.49157     | 49.1054 |
| 2      | 36.434        | FM   | 1.1889      | 3976.62866   | 55.74629     | 50.8946 |

Totals : 7813.46362 111.23786

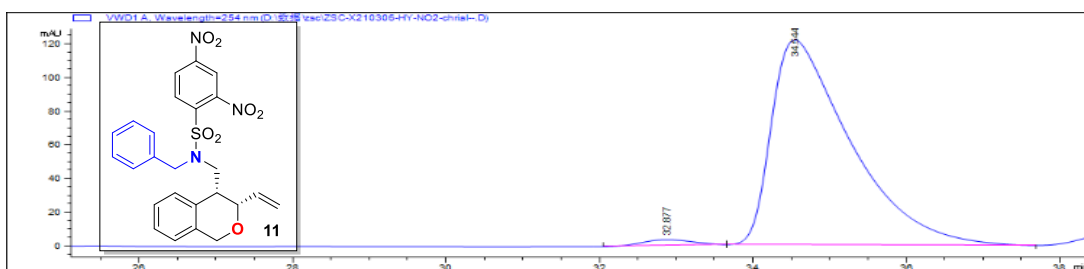

| Peak # | RetTime [min] | Type | Width [min] | Area [mAU*s] | Height [mAU] | Area %  |
|--------|---------------|------|-------------|--------------|--------------|---------|
| 1      | 32.877        | BB   | 0.6748      | 158.78146    | 3.50986      | 1.7809  |
| 2      | 34.544        | BB   | 1.0559      | 8757.04492   | 121.92727    | 98.2191 |

Totals : 8915.82639 125.43713

## 9 Mechanistic Studies

### 9.1 Control experiment

#### 9.1.1 Control experiment by using *E*-1a as starting material

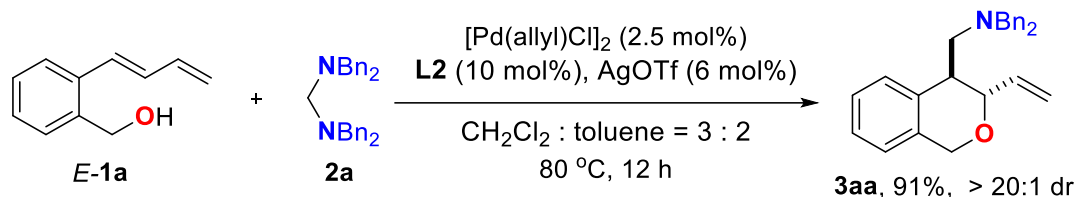

Aminal **2a** (122 mg, 0.30 mmol),  $[\text{Pd}(\text{allyl})\text{Cl}]_2$  (2.8 mg, 2.5 mol%), **L2** (13.0 mg, 10 mol%), AgOTf (4.6 mg, 6 mol%), dienol *E*-**1a** (58 mg, 0.36 mmol) and solvent ( $\text{CH}_2\text{Cl}_2$  : toluene = 3 : 2, 1.0 mL) were added to a 25 mL flame-dried Young-type tube under  $\text{N}_2$  atmosphere. The reaction mixture was stirred at 80 °C for 12 hours, and then cooled to room temperature. The solvent was removed under reduced pressure, the residue was purified by flash chromatography (deluted with petroleum ether/ethyl acetate = 200/1 to 50/1) on a silica gel to give product **3aa** as colorless oil (101 mg, 91%, > 20:1 dr).

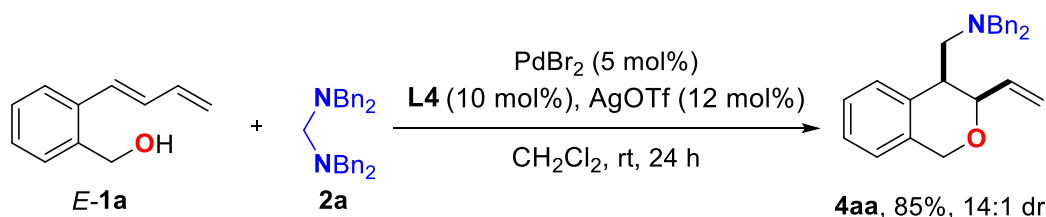

Aminal **2a** (122 mg, 0.30 mmol),  $\text{PdBr}_2$  (4.0 mg, 5 mol%), **L4** (15.5 mg, 10 mol%), AgOTf (9.3 mg, 12 mol%), dienol *E*-**1a** (58 mg, 0.36 mmol) and  $\text{CH}_2\text{Cl}_2$  (1.0 mL) were added to a 25 mL flame-dried Young-type tube under  $\text{N}_2$  atmosphere. The reaction mixture was stirred at room temperature for 12 hours, and then cooled to room temperature. The solvent was removed under reduced pressure, the residue was purified by flash chromatography (deluted with petroleum ether/ethyl acetate = 200/1 to 50/1) on a silica gel to give product **4aa** as colorless oil (94 mg, 85%, 14:1 dr).

#### 9.1.2 Control experiment

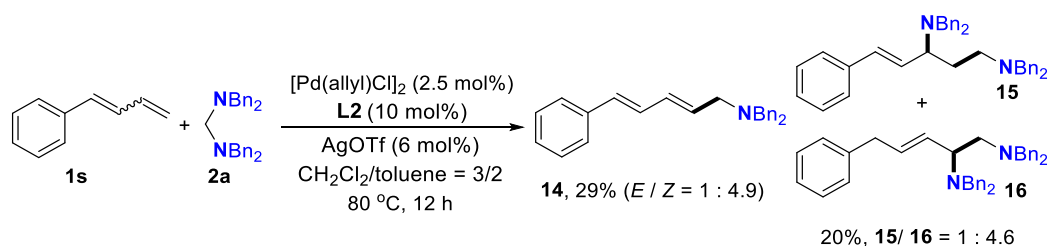

Aminal **2a** (122 mg, 0.30 mmol),  $[\text{Pd}(\text{allyl})\text{Cl}]_2$  (2.8 mg, 2.5 mol%), **L2** (13.0 mg, 10 mol%), AgOTf (4.6 mg, 6 mol%), diene **1s** (49 mg, 0.36 mmol) and solvent ( $\text{CH}_2\text{Cl}_2$  :

toluene = 3 : 2, 1.0 mL) were added to a 25 mL flame-dried Young-type tube under N<sub>2</sub> atmosphere. The reaction mixture was stirred at 80 °C for 12 hours, and then cooled to room temperature. The solvent was removed under reduced pressure, the residue was purified by flash chromatography (deluted with petroleum ether/ethyl acetate = 200/1 to 50/1) on a silica gel to give products **14** (29 mg, 29%, *E/Z* = 1:4.9, determined by <sup>1</sup>HNMR), **15** and **16** (32 mg, 20%, **15:16** = 1:4.6, determined by <sup>1</sup>HNMR) as colorless oil. The spectral data of **14**, **15** and **16** were consistent with spectral data from the reported methods<sup>10,11</sup>.

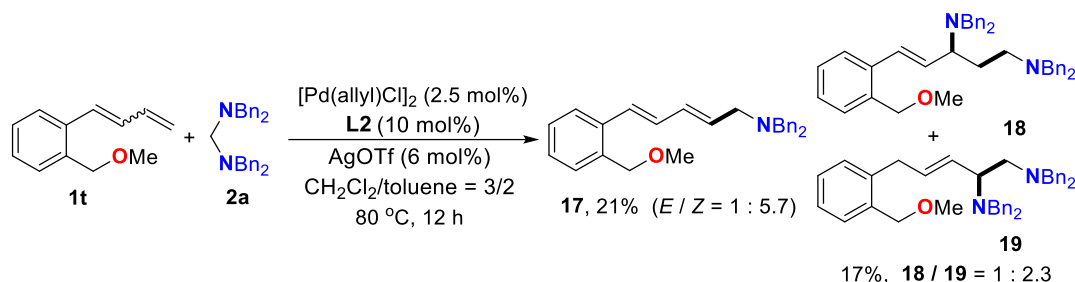

Aminal **2a** (122 mg, 0.30 mmol), [Pd(allyl)Cl]<sub>2</sub> (2.8 mg, 2.5 mol%), **L2** (13.0 mg, 10 mol%), AgOTf (4.6 mg, 6 mol%), diene **1t** (63 mg, 0.36 mmol) and solvent (CH<sub>2</sub>Cl<sub>2</sub> : toluene = 3 : 2, 1.0 mL) were added to a 25 mL flame-dried Young-type tube under N<sub>2</sub> atmosphere. The reaction mixture was stirred at 80 °C for 12 hours, and then cooled to room temperature. The solvent was removed under reduced pressure, the residue was purified by flash chromatography (deluted with petroleum ether/ethyl acetate = 200/1 to 50/1) on a silica gel to give products **17** (24 mg, 21%, *E/Z* = 1 : 5.7, determined by <sup>1</sup>HNMR), **18** and **19** (29 mg, 17%, **18** : **19** = 1:2.3) as colorless oil.

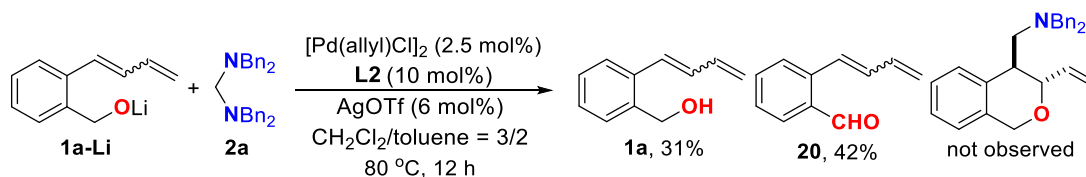

LDA (0.36 mmol) was added to the THF solution of **1a** (58 mg, 0.36 mmol) at 0 °C and stirred for 10 minutes, then drain the solvent. Aminal **2a** (122 mg, 0.30 mmol), [Pd(allyl)Cl]<sub>2</sub> (2.8 mg, 2.5 mol%), **L2** (13.0 mg, 10 mol%), AgOTf (4.6 mg, 6 mol%), and solvent (CH<sub>2</sub>Cl<sub>2</sub> : toluene = 3 : 2, 1.0 mL) were added to Young-type tube under N<sub>2</sub> atmosphere. The reaction mixture was stirred at 80 °C for 12 hours, and then cooled to room temperature. The solvent was removed under reduced pressure, the residue was purified by flash chromatography (deluted with petroleum ether/ethyl acetate = 200/1 to 50/1) on a silica gel to give the byproduct **20** (24 mg, 42%) and recycle **1a** (18 mg, 31%).

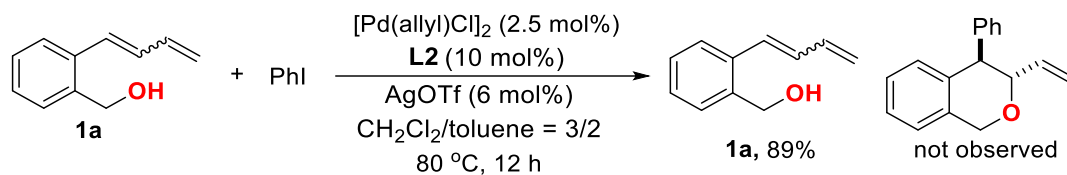

PhI (120.6 mg, 0.60 mmol), [Pd(allyl)Cl]<sub>2</sub> (2.8 mg, 2.5 mol%), **L2** (13.0 mg, 10 mol%), AgOTf (4.6 mg, 6 mol%), dienol **1a** (48 mg, 0.30 mmol) and solvent (CH<sub>2</sub>Cl<sub>2</sub> : toluene = 3 : 2, 1.0 mL) were added to a 25 mL flame-dried Young-type tube under N<sub>2</sub> atmosphere. The reaction mixture was stirred at 80 °C for 12 hours, and then cooled to room temperature. The solvent was removed under reduced pressure, the residue was purified by flash chromatography (deluted with petroleum ether/ethyl acetate = 20/1 to 5/1) on a silica gel to recycle **1a** (52 mg, 89%).

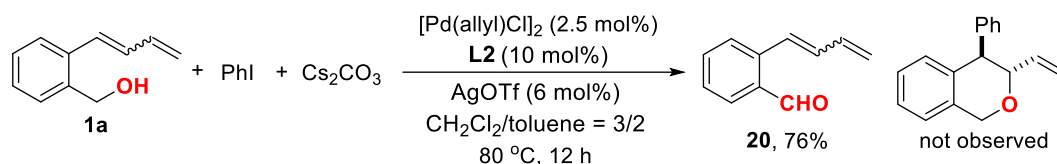

PhI (120.6 mg, 0.60 mmol), [Pd(allyl)Cl]<sub>2</sub> (2.8 mg, 2.5 mol%), **L2** (13.0 mg, 10 mol%), AgOTf (4.6 mg, 6 mol%), dienol **1a** (48 mg, 0.30 mmol), Cs<sub>2</sub>CO<sub>3</sub> (195.6 mg, 0.60 mmol), and solvent (CH<sub>2</sub>Cl<sub>2</sub> : toluene = 3 : 2, 1.0 mL) were added to a 25 mL flame-dried Young-type tube under N<sub>2</sub> atmosphere. The reaction mixture was stirred at 80 °C for 12 hours, and then cooled to room temperature. The solvent was removed under reduced pressure, the residue was purified by flash chromatography (deluted with petroleum ether/ethyl acetate = 20/1 to 5/1) on a silica gel to give the byproduct **20** (43 mg, 76%).

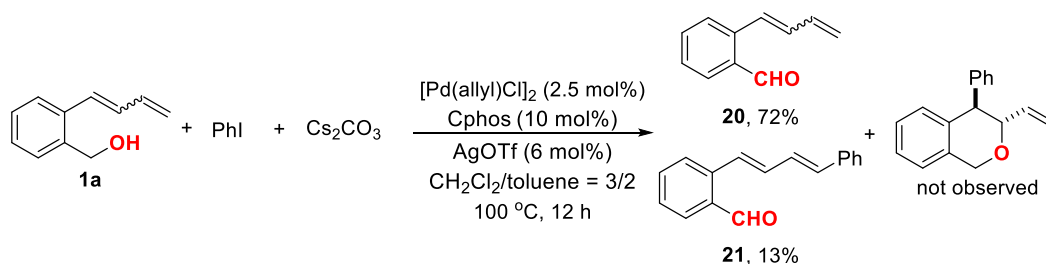

PhI (120.6 mg, 0.60 mmol), [Pd(allyl)Cl]<sub>2</sub> (2.8 mg, 2.5 mol%), **L2** (13.0 mg, 10 mol%), AgOTf (4.6 mg, 6 mol%), dienol **1a** (48 mg, 0.30 mmol), Cs<sub>2</sub>CO<sub>3</sub> (195.6 mg, 0.60 mmol), and solvent (CH<sub>2</sub>Cl<sub>2</sub> : toluene = 3 : 2, 1.0 mL) were added to a 25 mL flame-dried Young-type tube under N<sub>2</sub> atmosphere. The reaction mixture was stirred at 100 °C for 12 hours, and then cooled to room temperature. The solvent was removed under reduced pressure, the residue was purified by flash chromatography (deluted with

petroleum ether/ethyl acetate = 20/1 to 5/1) on a silica gel to give the byproduct **20** (34.1 mg, 72%) and **21** (9.1 mg, 13%).

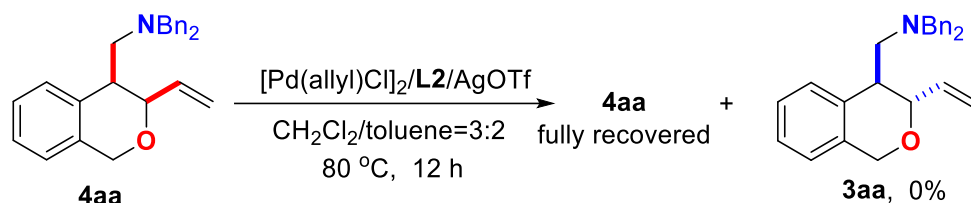

**4aa** (110.7 mg, 0.30 mmol),  $[Pd(allyl)Cl]_2$  (2.8 mg, 2.5 mol%), **L2** (13.0 mg, 10 mol%),  $AgOTf$  (4.6 mg, 6 mol%), and solvent ( $CH_2Cl_2$  : toluene = 3 : 2, 1.0 mL) were added to a 25 mL flame-dried Young-type tube under  $N_2$  atmosphere. The reaction mixture was stirred at  $80\text{ }^\circ C$  for 12 hours, and then cooled to room temperature. The solvent was removed under reduced pressure, the residue was purified by flash chromatography (deluted with petroleum ether/ethyl acetate = 200/1 to 50/1) on a silica gel to give product **4aa** as colorless oil (fully recovered).

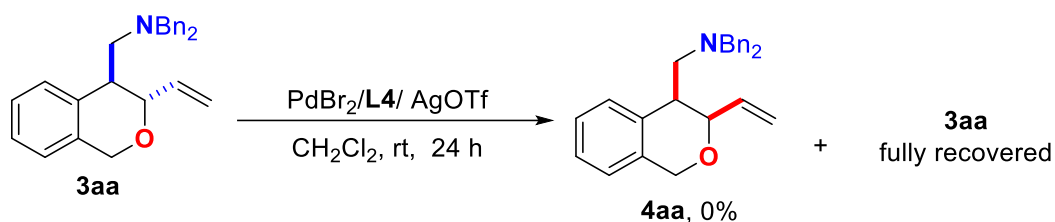

**3aa** (110.7 mg, 0.30 mmol),  $PdBr_2$  (4.0 mg, 5 mol%), **L4** (15.5 mg, 10 mol%),  $AgOTf$  (9.3 mg, 12 mol%), and  $CH_2Cl_2$  (1.0 mL) were added to a 25 mL flame-dried Young-type tube under  $N_2$  atmosphere. The reaction mixture was stirred at room temperature for 12 hours, and then cooled to room temperature. The solvent was removed under reduced pressure, the residue was purified by flash chromatography (deluted with petroleum ether/ethyl acetate = 200/1 to 50/1) on a silica gel to give product **3aa** as colorless oil (fully recovered).

### 1-(buta-1,3-dien-1-yl)-2-(methoxymethyl)benzene (**1t**)

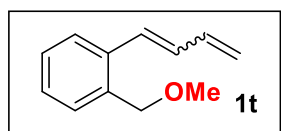

The title compound was prepared according to the general procedure and purified by column chromatography to give colorless oil, 0.6 g, 55% yield ( $E/Z = 1 : 6.7$ ).  $^1H\ NMR$  (500 MHz,  $CDCl_3$ )  $\delta$  7.57 (d,  $J = 7.5$  Hz, 0.13H), 7.39-7.41 (m, 0.87H), 7.18-7.23 (m, 3H), 6.57-6.88 (m, 2H), 6.51-6.55 (m, 0.13H), 6.36 (t,  $J = 11.0$  Hz, 0.87H), 5.33-5.36 (m, 1H), 5.16-5.20 (m, 1H), 4.43-4.52 (m, 2H), 3.38-3.40 (m, 3H);  $^{13}C\ NMR$  (125 MHz,

CDCl<sub>3</sub>)  $\delta$  137.6, 136.23, 136.20, 133.4, 131.8, 130.0, 128.7, 128.5, 127.5, 119.5, 72.7, 58.4; **HRMS** (ESI) calcd for C<sub>12</sub>H<sub>14</sub>ONa [M+Na]<sup>+</sup>: 197.0942, found: 197.0948.

***N,N*-dibenzyl-1-(2-vinyl-2,3-dihydrobenzofuran-3-yl)methanamine (17)**

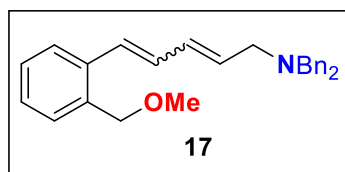

The title compound was prepared according to the general procedure and purified by column chromatography to give colorless oil, 24 mg, 21% yield (*E/Z* = 5.7 : 1). <sup>1</sup>H

**NMR** (400 MHz, CDCl<sub>3</sub>)  $\delta$  7.55 (d, *J* = 7.6 Hz, 1H), 7.20-7.40 (m, 13H), 6.69-6.92 (m, 2H), 6.33-6.43 (m, 1H), 5.88-5.95 (m, 0.85H), 5.68-5.73 (m, 0.15H), 4.50 (s, 2H), 3.60-3.61 (m, 4H), 3.39 (s, 3H), 3.29 (d, *J* = 7.2 Hz, 0.30H), 3.16 (d, *J* = 6.8 Hz, 1.70H); <sup>13</sup>C **NMR** (125 MHz, CDCl<sub>3</sub>)  $\delta$  139.7, 136.7, 135.0, 133.5, 132.6, 130.8, 129.5, 129.0, 128.9, 128.3, 128.2, 127.3, 127.0, 125.6, 73.0, 58.2, 58.0, 55.6; **HRMS** (ESI) calcd for C<sub>27</sub>H<sub>30</sub>NO [M+H]<sup>+</sup>: 384.2327, found: 384.2325.

***(E)*-*N*<sup>1</sup>,*N*<sup>1</sup>,*N*<sup>3</sup>,*N*<sup>3</sup>-tetrabenzyl-5-(2-(methoxymethyl)phenyl)pent-4-ene-1,3-diamine and *(E)*-*N*<sup>1</sup>,*N*<sup>1</sup>,*N*<sup>2</sup>,*N*<sup>2</sup>-tetrabenzyl-5-(2-(methoxymethyl)phenyl)pent-3-ene-1,2-diamine (18 + 19)**

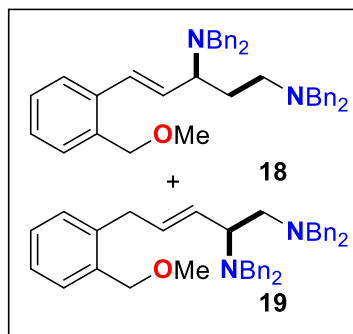

The title compound was prepared according to the general procedure and purified by column chromatography to give colorless oil, 29 mg, 17% yield (**18** / **19** = 1 : 2.6). <sup>1</sup>H **NMR** (500 MHz, CDCl<sub>3</sub>)  $\delta$  7.11-7.47 (m, 23H), 6.90-7.09 (m, 1H), 6.49 (d, *J* = 16.0 Hz, 0.28H), 6.02 (dd, *J* = 16.0 Hz, 9.0 Hz, 0.28H), 5.70 (dd,

*J* = 15.0 Hz, 7.0 Hz, 0.72H), 5.45-5.51 (m, 0.72H), 4.34-4.47 (m, 2H), 3.55-4.02 (m, 5H), 3.23-3.50 (m, 7H), 2.98-3.00 (m, 1.72H), 2.62-2.82 (m, 1.72H), 2.33-2.38 (m, 0.28H), 1.73-1.78 (m, 0.28H); <sup>13</sup>C **NMR** (125 MHz, CDCl<sub>3</sub>)  $\delta$  142.3, 140.5, 139.9, 139.8, 136.8, 136.4, 135.4, 134.9, 130.6, 130.4, 129.5, 129.2, 129.1, 129.0, 128.9, 128.8, 128.31, 128.29, 128.26, 128.2, 128.0, 127.9, 127.4, 126.90, 126.88, 126.8, 126.4, 126.0,

73.1, 59.3, 58.9, 58.8, 58.5, 58.4, 58.0, 57.9, 55.9, 53.9, 51.2, 41.6; **HRMS** (ESI) calcd for C<sub>41</sub>H<sub>45</sub>N<sub>2</sub>O [M+H]<sup>+</sup>: 581.3532, found: 581.3540.

### 2-(buta-1,3-dien-1-yl)benzaldehyde (20)

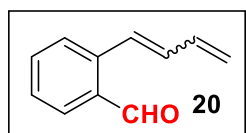

The title compound was prepared according to the general procedure and purified by column chromatography to give colorless oil, 24 mg, 42% yield (*E/Z* = 1 : 2.6). **<sup>1</sup>H NMR** (400 MHz, CDCl<sub>3</sub>) δ 10.26 (s, 0.28H), 10.20 (s, 0.72H), 7.90 (d, *J* = 7.6 Hz, 0.72H), 7.81 (d, *J* = 7.6 Hz, 0.28H), 7.32-7.62 (m, 3H), 6.43-6.91 (m, 3H), 5.21-5.45 (m, 2H); **<sup>13</sup>C NMR** (100 MHz, CDCl<sub>3</sub>) δ 192.5, 192.2, 140.0, 139.6, 137.0, 134.7, 133.81, 133.78, 133.7, 133.5, 132.7, 132.5, 132.1, 131.0, 129.6, 128.5, 127.73, 127.67, 127.0, 121.0, 119.6; **HRMS** (ESI) calcd for C<sub>11</sub>H<sub>10</sub>ONa [M+Na]<sup>+</sup>: 181.0624, found: 181.0635.

### 2-((1*E*,3*E*)-4-phenylbuta-1,3-dien-1-yl)benzaldehyde (21)

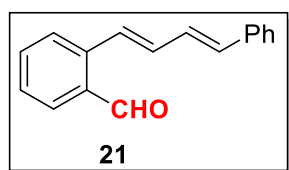

The title compound was prepared according to the general procedure and purified by column chromatography to give colorless oil. 9.1 mg, 13% yield. **<sup>1</sup>H NMR** (500 MHz, CDCl<sub>3</sub>) δ 10.28 (s, 1H), 7.80 (d, *J* = 8.0 Hz, 1H), 7.61-7.68 (m, 2H), 7.54 (t, *J* = 7.5 Hz, 1H), 7.45-7.46 (m, 2H), 7.39 (t, *J* = 7.5 Hz, 1H), 7.32-7.35 (m, 2H), 7.24-7.27 (m, 1H), 7.07 (dd, *J* = 15.5 Hz, 10.5 Hz, 1H), 6.96 (dd, *J* = 15.5 Hz, 10.5 Hz, 1H), 6.74 (d, *J* = 15.5 Hz, 1H); **<sup>13</sup>C NMR** (125 MHz, CDCl<sub>3</sub>) δ 192.8, 139.8, 137.1, 134.9, 134.4, 133.7, 132.65, 132.61, 129.2, 128.8, 128.4, 128.1, 127.6, 126.8, 126.7.

## 9.2 Non-Linear Effect Studies

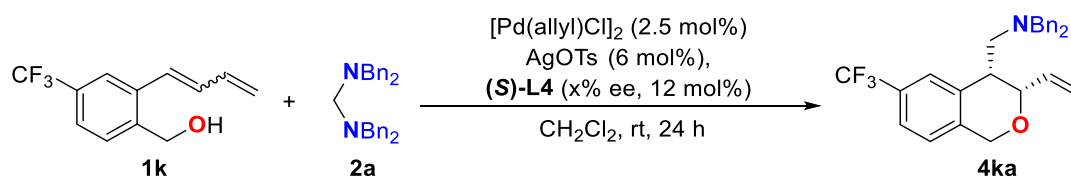



| entry | x     | yield (%) | ee (%) |
|-------|-------|-----------|--------|
| 1     | 15.6% | 61%       | 22%    |
| 2     | 29.9% | 65%       | 37%    |
| 3     | 44.2% | 62%       | 56%    |
| 4     | 60%   | 61%       | 64%    |
| 5     | 75.4% | 66%       | 77%    |
| 6     | 90.5% | 59%       | 92%    |
| 7     | 100%  | 67%       | 94%    |

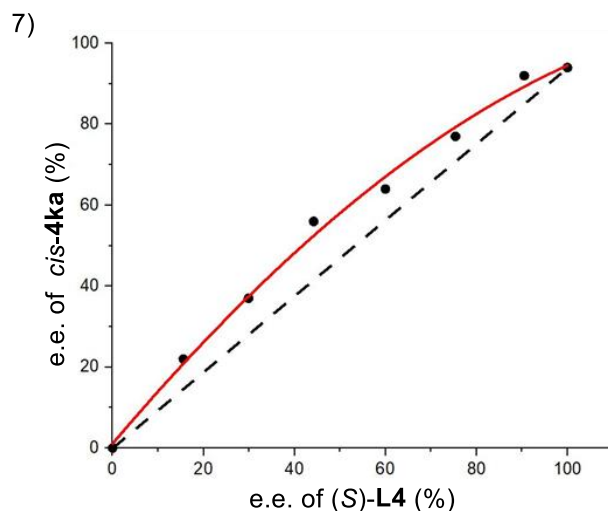

**Figure S5. Non-Linear relationship between optically ligand L4 and product *cis*-4ka**

In a glove box, the mixture of  $[\text{Pd}(\text{allyl})\text{Cl}]_2$  (2.8 mg, 0.0075 mmol), (*S*)-L4 with different ee values (18.5 mg, 0.036 mmol), AgOTs (5.0 mg, 0.018 mmol) and  $\text{CH}_2\text{Cl}_2$  (1 mL) was added to a Young-type tube and stirred at 45 °C for 30 minutes. After the mixture cooled to room temperature, *N,N,N',N'*-tetrabenzylmethanediamine **2a** (0.3 mmol) and **1k** (0.36 mmol) were added under nitrogen. The reaction mixture was degassed via the freeze-thaw method and stirred at rt for 24 hours. The solvent was evaporated under reduced pressure and the residue was purified by flash column chromatography (eluted with petroleum ether/diethyl ether = 100/1 to 50/1) on a silica gel to give the desired product. [The ee value of the product was determined by HPLC with a Chiralpak AD-H column (90 : 10 = Hexane : isopropanol, 0.5 mL / min, 220 nm, 25 °C); t (major) = 7.8 min, t (minor) = 8.4 min. As shown in **Figure S5**, the non-linear relationship between the ee value of enantioenriched ligand L4 and the ee value of the *cis*-4ka.

### 9.3 Investigation the effect of additive.

Aminal **2a** (122 mg, 0.30 mmol), [Pd(allyl)Cl]<sub>2</sub> (2.8 mg, 2.5 mol%), **L2** (13.0 mg, 10 mol%), AgOTf (4.6 mg, 6 mol%), additive (3.0 mmol, 10 eq.), dienol **1a** (58 mg, 0.36 mmol) and solvent (CH<sub>2</sub>Cl<sub>2</sub> : toluene = 3 : 2, 1.0 mL) were added to a 25 mL flame-dried Young-type tube under N<sub>2</sub> atmosphere. The reaction mixture was stirred at 80 °C for 12 hours, and then cooled to room temperature. The solvent was removed under reduced pressure, the residue was purified by flash chromatography (deluted with petroleum ether/ethyl acetate = 200/1 to 50/1) on a silica gel to give product **3aa** as colorless oil. The dr value of the crude reaction mixture was determined by <sup>1</sup>HNMR analysis. The rr value of the crude reaction mixture was determined by GC and GCMS.

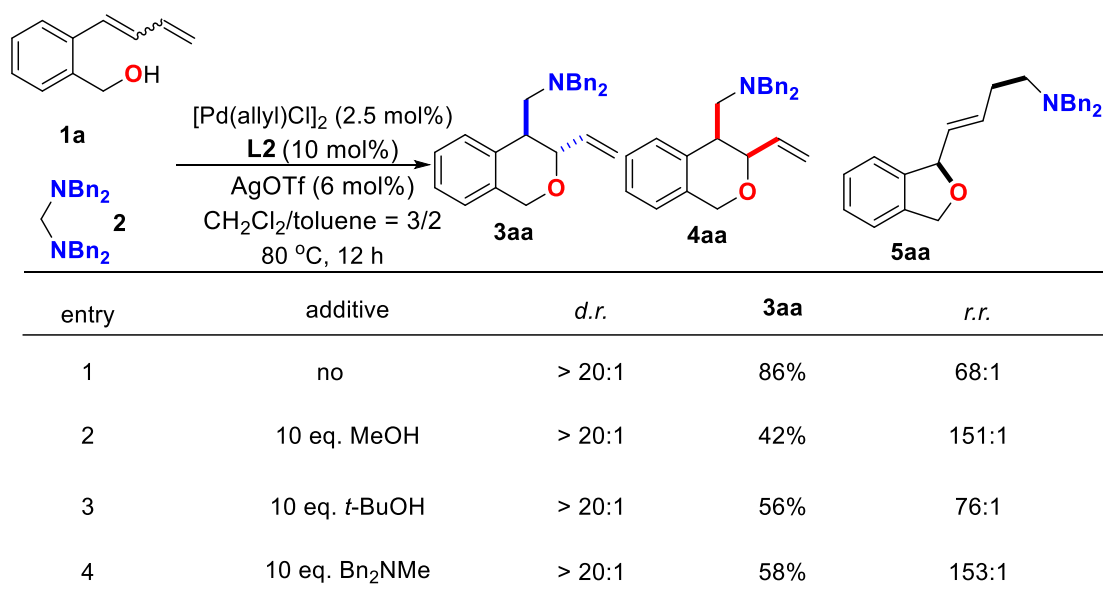

**Figure S6. Additive effect for the Pd-catalyzed aminomethylative annulation with **L2**.**

### 9.4 Hammett studies

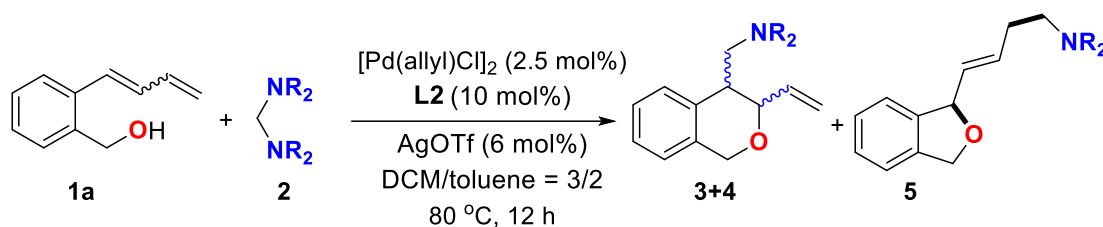

Aminal **2** (0.30 mmol), [Pd(allyl)Cl]<sub>2</sub> (2.8 mg, 2.5 mol%), **L2** (13.0 mg, 10 mol%), AgOTf (4.6 mg, 6 mol%), additive (3.0 mmol, 10 eq.), dienol **1a** (58 mg, 0.36 mmol) and solvent (CH<sub>2</sub>Cl<sub>2</sub> : toluene = 3 : 2, 1.0 mL) were added to a 25 mL flame-dried Young-type tube under N<sub>2</sub> atmosphere. The reaction mixture was stirred at 80 °C for

12 hours, and then cooled to room temperature. The rr value of the crude reaction mixture was determined by GC and GCMS.

|              |                                       |                         |                        |                     |                         |                          |
|--------------|---------------------------------------|-------------------------|------------------------|---------------------|-------------------------|--------------------------|
| <i>r.r.:</i> | 18/1                                  | 51/1                    | 89/1                   | 68/1                | 174/1                   | 213/1                    |
| R:           | 4-CF <sub>3</sub> PhCH <sub>2</sub> - | 4-ClPhCH <sub>2</sub> - | 4-FPhCH <sub>2</sub> - | PhCH <sub>2</sub> - | 4-MePhCH <sub>2</sub> - | 4-OMePhCH <sub>2</sub> - |

electron-withdrawing  $\rightleftarrows$  electron-donating

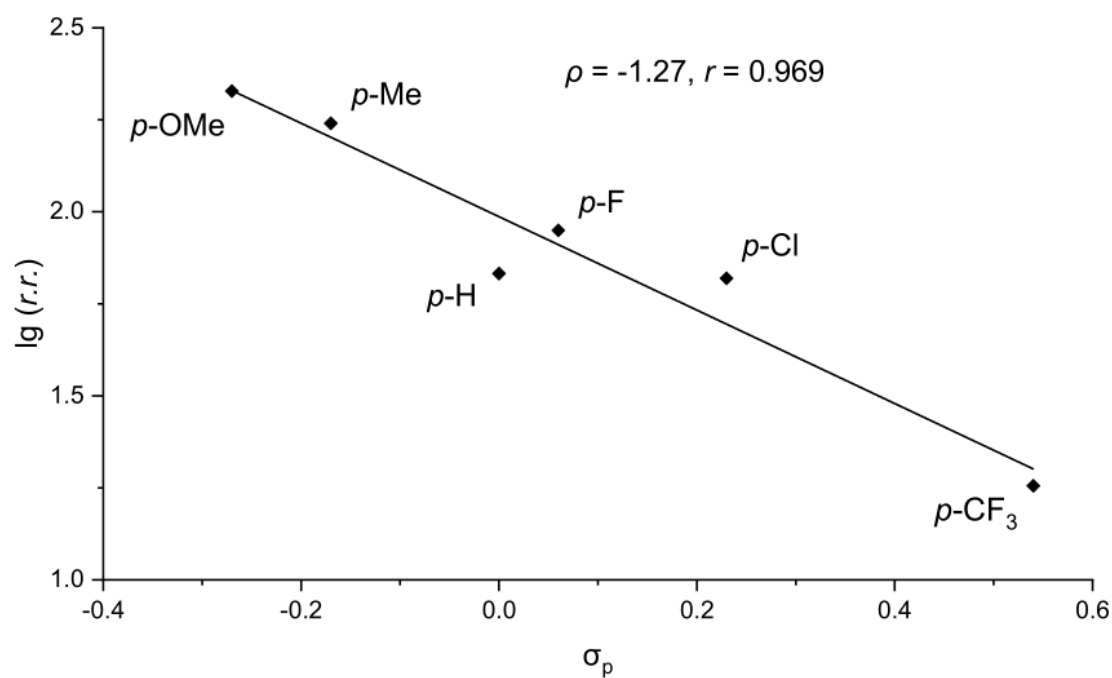

**Figure S7. Hammett plot for the Pd-catalyzed Aminomethylative Annulation with L2.**

### 9.5 Computational study

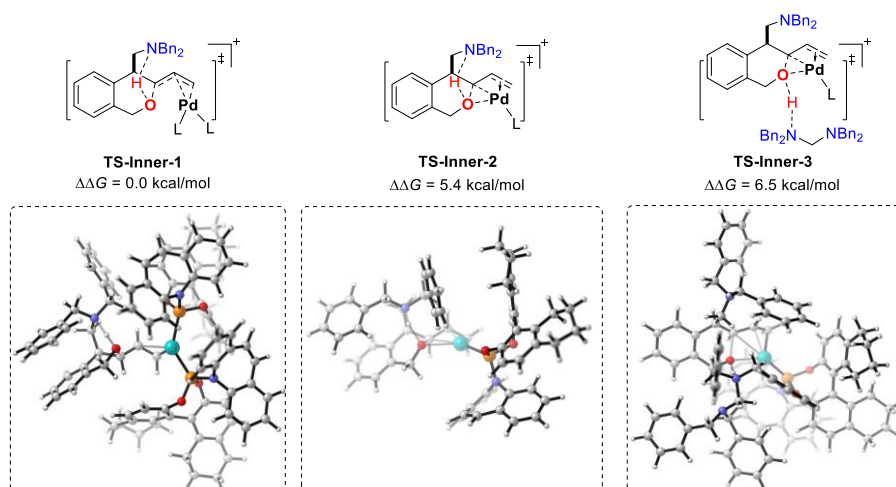

**Figure S8.** The relative free energies of the calculated possible transition states for the inner-sphere reductive elimination when electron-deficient **L4** was utilized as ligand.

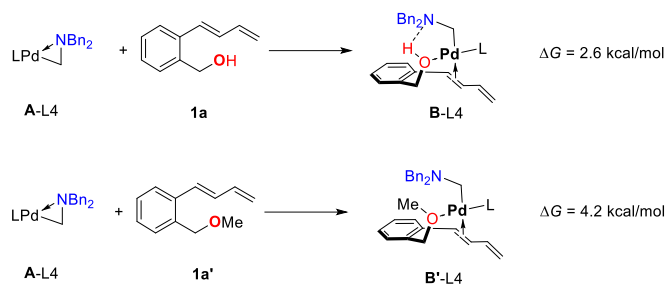

**Figure S9.** Calculated Gibbs energy for the coordination of **1a** and **1a'** substrates to Pd(II) center in cyclopalladated complex A using P-alkene ligand.

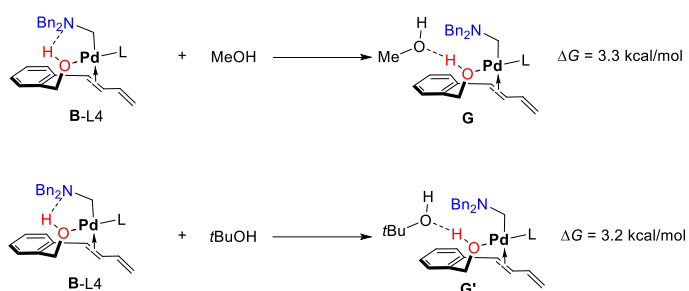

**Figure S10.** Calculated Gibbs energy for disruption of the intramolecular H-bond in intermediate **B** by methanol and *t*-butanol.

## 10 X-ray Crystallographic Data

Sample preparation: Racemic Compound **7** (30 mg) was dissolved in anhydrous *n*-Hexane (1.0 mL) in a 5 mL sample vial. The resulting mixture was left at -20 °C under airtight conditions until the white crystals precipitated.

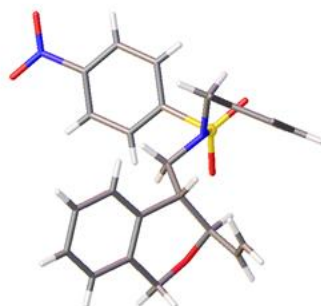

(7)

The ellipsoid contour percent probability level is 50%

Crystal data and structure refinement for HY-X20927-1

|                                                              |                                                                              |
|--------------------------------------------------------------|------------------------------------------------------------------------------|
| Identification code                                          | HY-X20927-1                                                                  |
| Empirical formula                                            | C <sub>25</sub> H <sub>24</sub> N <sub>2</sub> O <sub>5</sub> S              |
| Formula weight                                               | 464.52                                                                       |
| Temperature/K                                                | 293(2)                                                                       |
| Crystal system                                               | monoclinic                                                                   |
| Space group                                                  | P2 <sub>1</sub> /c                                                           |
| <i>a</i> /Å                                                  | 14.60983(19)                                                                 |
| <i>b</i> /Å                                                  | 31.1413(5)                                                                   |
| <i>c</i> /Å                                                  | 10.11618(15)                                                                 |
| $\alpha$ /°                                                  | 90                                                                           |
| $\beta$ /°                                                   | 91.5530(12)                                                                  |
| $\gamma$ /°                                                  | 90                                                                           |
| Volume/Å <sup>3</sup>                                        | 4600.85(12)                                                                  |
| <i>Z</i>                                                     | 8                                                                            |
| $\rho_{\text{calc}}/\text{cm}^3$                             | 1.341                                                                        |
| $\mu/\text{mm}^{-1}$                                         | 1.582                                                                        |
| <i>F</i> (000)                                               | 1952.0                                                                       |
| Crystal size/mm <sup>3</sup>                                 | 0.2 × 0.2 × 0.15                                                             |
| Radiation                                                    | CuK $\alpha$ ( $\lambda$ = 1.54184)                                          |
| 2 $\Theta$ range for data collection/°                       | 8.3 to 140.096                                                               |
| Index ranges                                                 | -10 ≤ <i>h</i> ≤ 17, -37 ≤ <i>k</i> ≤ 34, -12 ≤ <i>l</i> ≤ 11                |
| Reflections collected                                        | 18304                                                                        |
| Independent reflections                                      | 8507 [ <i>R</i> <sub>int</sub> = 0.0215, <i>R</i> <sub>sigma</sub> = 0.0264] |
| Data/restraints/parameters                                   | 8507/2/595                                                                   |
| Goodness-of-fit on <i>F</i> <sup>2</sup>                     | 0.954                                                                        |
| Final <i>R</i> indexes [ <i>I</i> ≥ 2 $\sigma$ ( <i>I</i> )] | <i>R</i> <sub>1</sub> = 0.0591, <i>wR</i> <sub>2</sub> = 0.2117              |

Final R indexes [all data]  $R_1 = 0.0792$ ,  $wR_2 = 0.2480$   
 Largest diff. peak/hole / e  $\text{\AA}^{-3}$  0.56/-0.38

Sample preparation: Racemic compound **12** (30 mg) was dissolved in anhydrous *n*-Hexane (1.0 mL) in a 5 mL sample vial. The resulting mixture was left at room temperature under airtight conditions until the white crystals precipitated.

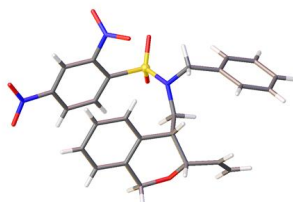

(12)

The ellipsoid contour percent probability level is 50%

|                                                |                                                                  |
|------------------------------------------------|------------------------------------------------------------------|
| Identification code                            | hy-x2020921                                                      |
| Empirical formula                              | $C_{25}H_{21}N_3O_7S$                                            |
| Formula weight                                 | 507.51                                                           |
| Temperature/K                                  | 293(2)                                                           |
| Crystal system                                 | triclinic                                                        |
| Space group                                    | P-1                                                              |
| $a/\text{\AA}$                                 | 7.2994(2)                                                        |
| $b/\text{\AA}$                                 | 8.0887(3)                                                        |
| $c/\text{\AA}$                                 | 21.2887(8)                                                       |
| $\alpha/^\circ$                                | 91.614(3)                                                        |
| $\beta/^\circ$                                 | 94.807(2)                                                        |
| $\gamma/^\circ$                                | 100.145(2)                                                       |
| Volume/ $\text{\AA}^3$                         | 1231.76(7)                                                       |
| Z                                              | 2                                                                |
| $\rho_{\text{calc}}/\text{cm}^3$               | 1.368                                                            |
| $\mu/\text{mm}^{-1}$                           | 1.604                                                            |
| F(000)                                         | 528.0                                                            |
| Crystal size/ $\text{mm}^3$                    | 0.25 × 0.2 × 0.15                                                |
| Radiation                                      | CuK $\alpha$ ( $\lambda = 1.54184$ )                             |
| 2 $\theta$ range for data collection/ $^\circ$ | 8.344 to 139.74                                                  |
| Index ranges                                   | $-8 \leq h \leq 6$ , $-9 \leq k \leq 9$ , $-25 \leq l \leq 24$   |
| Reflections collected                          | 7263                                                             |
| Independent reflections                        | 4455 [ $R_{\text{int}} = 0.0146$ , $R_{\text{sigma}} = 0.0219$ ] |
| Data/restraints/parameters                     | 4455/2/325                                                       |
| Goodness-of-fit on $F^2$                       | 1.050                                                            |
| Final R indexes [ $I \geq 2\sigma(I)$ ]        | $R_1 = 0.0584$ , $wR_2 = 0.1702$                                 |
| Final R indexes [all data]                     | $R_1 = 0.0629$ , $wR_2 = 0.1764$                                 |
| Largest diff. peak/hole / e $\text{\AA}^{-3}$  | 0.65/-0.46                                                       |

Sample preparation: chiral compound **12** (30 mg) was dissolved in anhydrous *n*-Hexane (1.0 mL) in a 5 mL sample vial. The resulting mixture was left at room temperature under airtight conditions until the white crystals precipitated.

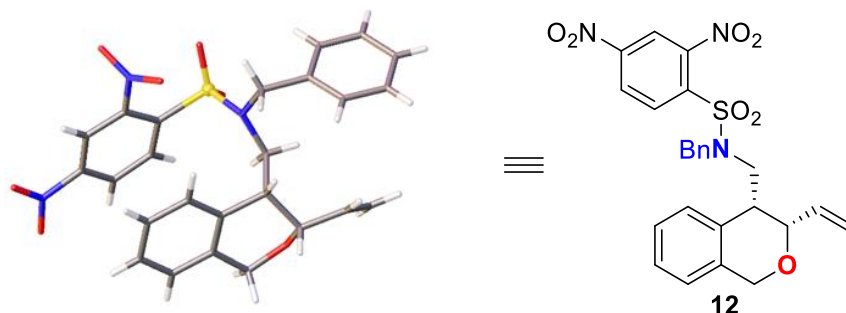

(3*S*,4*R*-**12**)

The ellipsoid contour percent probability level is 50%

Crystal data and structure refinement for *hy-cis*.

|                                                              |                                                                              |
|--------------------------------------------------------------|------------------------------------------------------------------------------|
| Identification code                                          | <i>hy-cis</i>                                                                |
| Empirical formula                                            | C <sub>25</sub> H <sub>23</sub> N <sub>3</sub> O <sub>7</sub> S              |
| Formula weight                                               | 509.52                                                                       |
| Temperature/K                                                | 293(2)                                                                       |
| Crystal system                                               | monoclinic                                                                   |
| Space group                                                  | P2 <sub>1</sub>                                                              |
| <i>a</i> /Å                                                  | 7.58320(10)                                                                  |
| <i>b</i> /Å                                                  | 15.88330(10)                                                                 |
| <i>c</i> /Å                                                  | 10.58560(10)                                                                 |
| $\alpha$ /°                                                  | 90                                                                           |
| $\beta$ /°                                                   | 104.4290(10)                                                                 |
| $\gamma$ /°                                                  | 90                                                                           |
| Volume/Å <sup>3</sup>                                        | 1234.78(2)                                                                   |
| <i>Z</i>                                                     | 2                                                                            |
| $\rho_{\text{calc}}/\text{cm}^3$                             | 1.370                                                                        |
| $\mu/\text{mm}^{-1}$                                         | 1.600                                                                        |
| <i>F</i> (000)                                               | 532.0                                                                        |
| Crystal size/mm <sup>3</sup>                                 | 0.3 × 0.21 × 0.1                                                             |
| Radiation                                                    | Cu K $\alpha$ ( $\lambda$ = 1.54184)                                         |
| 2 $\theta$ range for data collection/°                       | 8.626 to 139.888                                                             |
| Index ranges                                                 | -5 ≤ <i>h</i> ≤ 8, -19 ≤ <i>k</i> ≤ 19, -12 ≤ <i>l</i> ≤ 12                  |
| Reflections collected                                        | 8204                                                                         |
| Independent reflections                                      | 4459 [ <i>R</i> <sub>int</sub> = 0.0201, <i>R</i> <sub>sigma</sub> = 0.0212] |
| Data/restraints/parameters                                   | 4459/1/325                                                                   |
| Goodness-of-fit on <i>F</i> <sup>2</sup>                     | 0.822                                                                        |
| Final <i>R</i> indexes [ <i>I</i> ≥ 2 $\sigma$ ( <i>I</i> )] | <i>R</i> <sub>1</sub> = 0.0379, <i>wR</i> <sub>2</sub> = 0.0962              |

|                                               |                                  |
|-----------------------------------------------|----------------------------------|
| Final R indexes [all data]                    | $R_1 = 0.0383$ , $wR_2 = 0.0976$ |
| Largest diff. peak/hole / e $\text{\AA}^{-3}$ | 0.19/-0.47                       |
| Flack parameter                               | 0.032(7)                         |



## 11. References

1. H. Heaney, G. Papageorgiou and R. F. Wilkins, *Tetrahedron*, 1997, **53**, 2941.
2. T. Rosenau, A. Potthast and P. Kosma, *Tetrahedron*, 2004, **60**, 301.
3. T. Kleine, K. Bergander, R. Frohlich, B. Wibbeling and E. Wurthwein, *J. Org. Chem.*, 2011, **76**, 1979.
4. B. Yu, S. Zou, H. Liu and H. Huang, *J. Am. Chem. Soc.*, 2020, **142**, 18341.
5. Q. Liu, J. Meng, Y. Liu, C. Yang and W. Xia, *J. Org. Chem.*, 2014, **79**, 8143.
6. R. A. Olofson, J. T. Martz, J. P. Senet, M. Piteau and T. Malfroot, *J. Org. Chem.*, 1984, **49**, 2081.
7. L. Petersen, E.-B. Pedersen and C. Nielsenb, *Synthesis*, 2001, **4**, 559.
8. F. Yang, J.-J. Newsome and D.-P. Curran, *J. Am. Chem. Soc.*, 2006, **128**, 14200.
9. G.-Q. Liu, Z.-Y. Ding, L. Zhang, T.-T. Li, L. Li, L.-L. Duan and Y.-M. Li, *Adv. Synth. Catal.*, 2014, **356**, 2303.
10. L. Yang, Y. Xie, H. Wang and H. Huang, *J. Am. Chem. Soc.*, 2016, **138**, 4314.
11. C. Qiao, A. Chen, B. Gao, Y. Liu and H. Huang, *Chin. J. Chem.*, 2018, **36**, 929.
12. Reference for computational study: M. J. Frisch, G. W. Trucks, H. B. Schlegel, G. E. Scuseria, M. A. Robb, J. R. Cheeseman, G. Scalmani, V. Barone, G. A. Petersson, H. Nakatsuji, X. Li, M. Caricato, A. V. Marenich, J. Bloino, B. G. Janesko, R. Gomperts, B. Mennucci, H. P. Hratchian, J. V. Ortiz, A. F. Izmaylov, J. L. Sonnenberg, D. Williams-Young, F. Ding, F. Lipparini, F. Egidi, J. Goings, B. Peng, A. Petrone, T. Henderson, D. Ranasinghe, V. G. Zakrzewski, J. Gao, N. Rega, G. Zheng, W. Liang, M. Hada, M. Ehara, K. Toyota, R. Fukuda, J. Hasegawa, M. Ishida, T. Nakajima, Y. Honda, O. Kitao, H. Nakai, T. Vreven, K. Throssell, J. A. Montgomery, Jr., J. E. Peralta, F. Ogliaro, M. J. Bearpark, J. J. Heyd, E. N. Brothers, K. N. Kudin, V. N. Staroverov, T. A. Keith, R. Kobayashi, J. Normand, K. Raghavachari, A. P. Rendell, J. C. Burant, S. S. Iyengar, J. Tomasi, M. Cossi, J. M. Millam, M. Klene, C. Adamo, R. Cammi, J. W. Ochterski, R. L. Martin, K. Morokuma, O. Farkas, J. B. Foresman, and D. J. Fox, Gaussian, Inc., Gaussian 16, Revision A.03; Wallingford CT, **2016**.
13. (a) A. D. Becke, *J. Chem. Phys.*, 1993, **98**, 5648-5652. (b) C. Lee, W. Yang and R. G. Parr, *Phys. Rev. B: Condens. Matter Mater. Phys.*, 1988, **37**, 785.
14. Y. Zhao and D. G. Truhlar, *Theor. Chem. Acc.*, 2008, **120**, 215.
15. (a) M. Cossi, V. Barone, R. Cammi and J. Tomasi, *Chem. Phys. Lett.*, 1996, **255**, 327. (b) E. Cancès, B. Mennucci and J. Tomasi, *J. Chem. Phys.*, 1997, **107**, 3032. (c) V. Barone, M. Cossi and J. Tomasi, *J. Comput. Chem.*, 1998, **19**, 404. (d) A. V. Marenich, C. J. Cramer and D. G. Truhlar, *J. Phys. Chem. B*, 2009, **113**, 6378.
16. C. Y. Legault, CYLView, 1.0b; Université de Sherbrooke, Canada, (2009). <http://www.cylview.org> (Date of access: 1/10/2017).

## 12. Copies of NMR of Materials and Products

hy-S-1a <sup>1</sup>H NMR (500MHz CDCl<sub>3</sub>)

hy-yuan-dieneol---

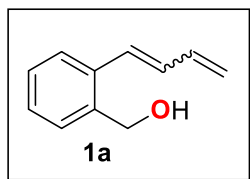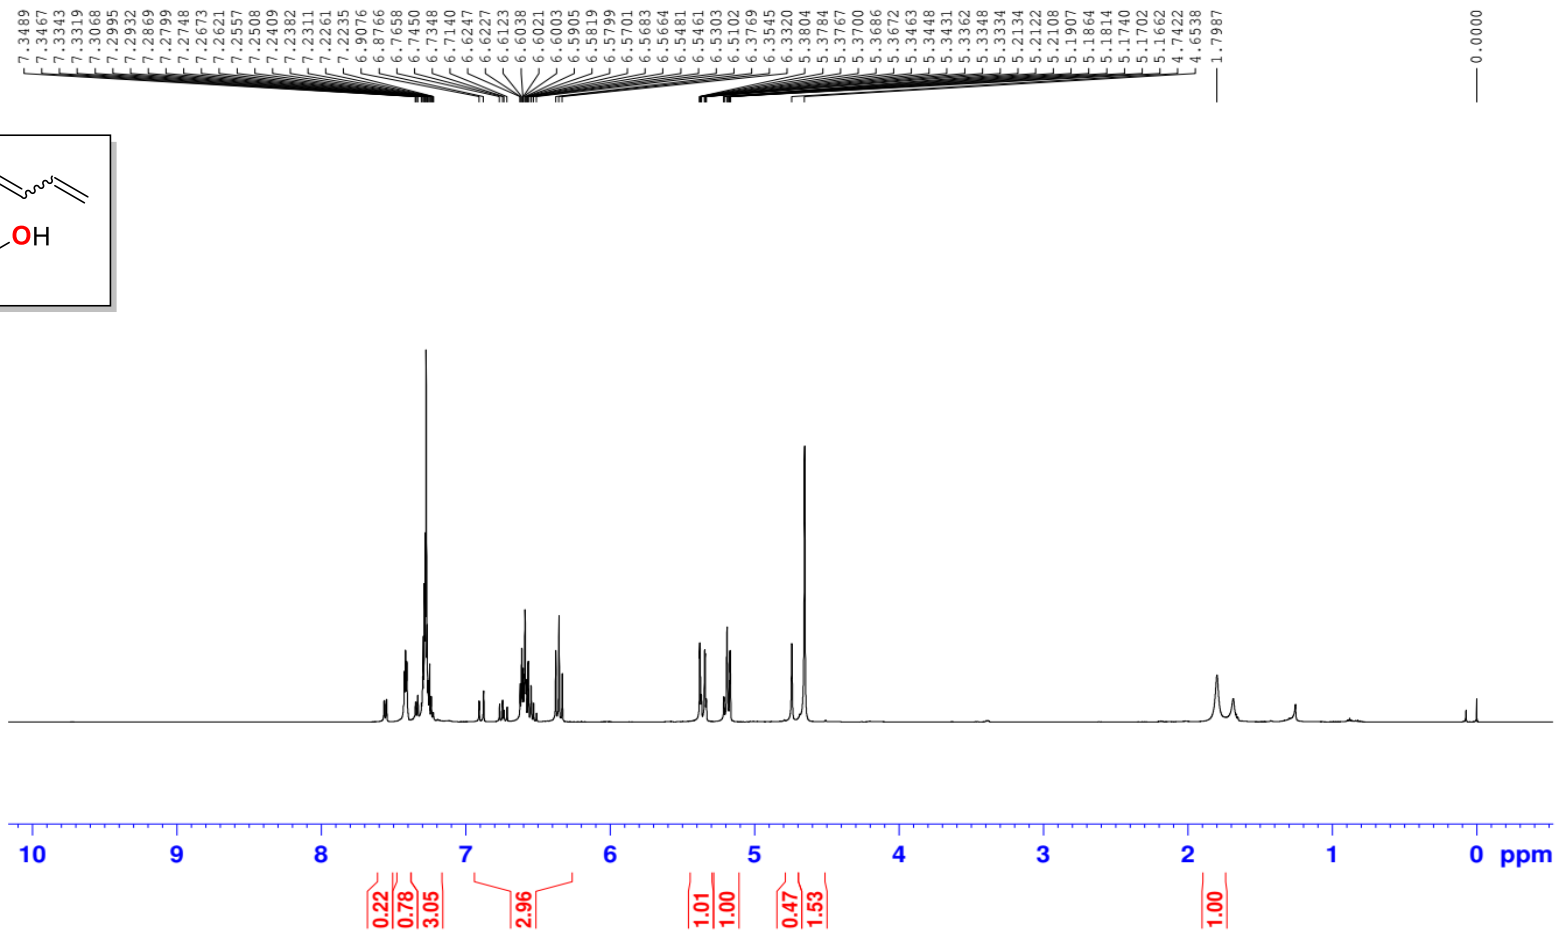

hy-S-1a <sup>13</sup>C NMR (125MHz CDCl<sub>3</sub>)

hy-yuan-dieneol-

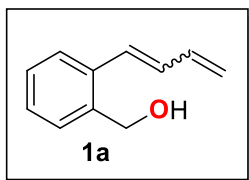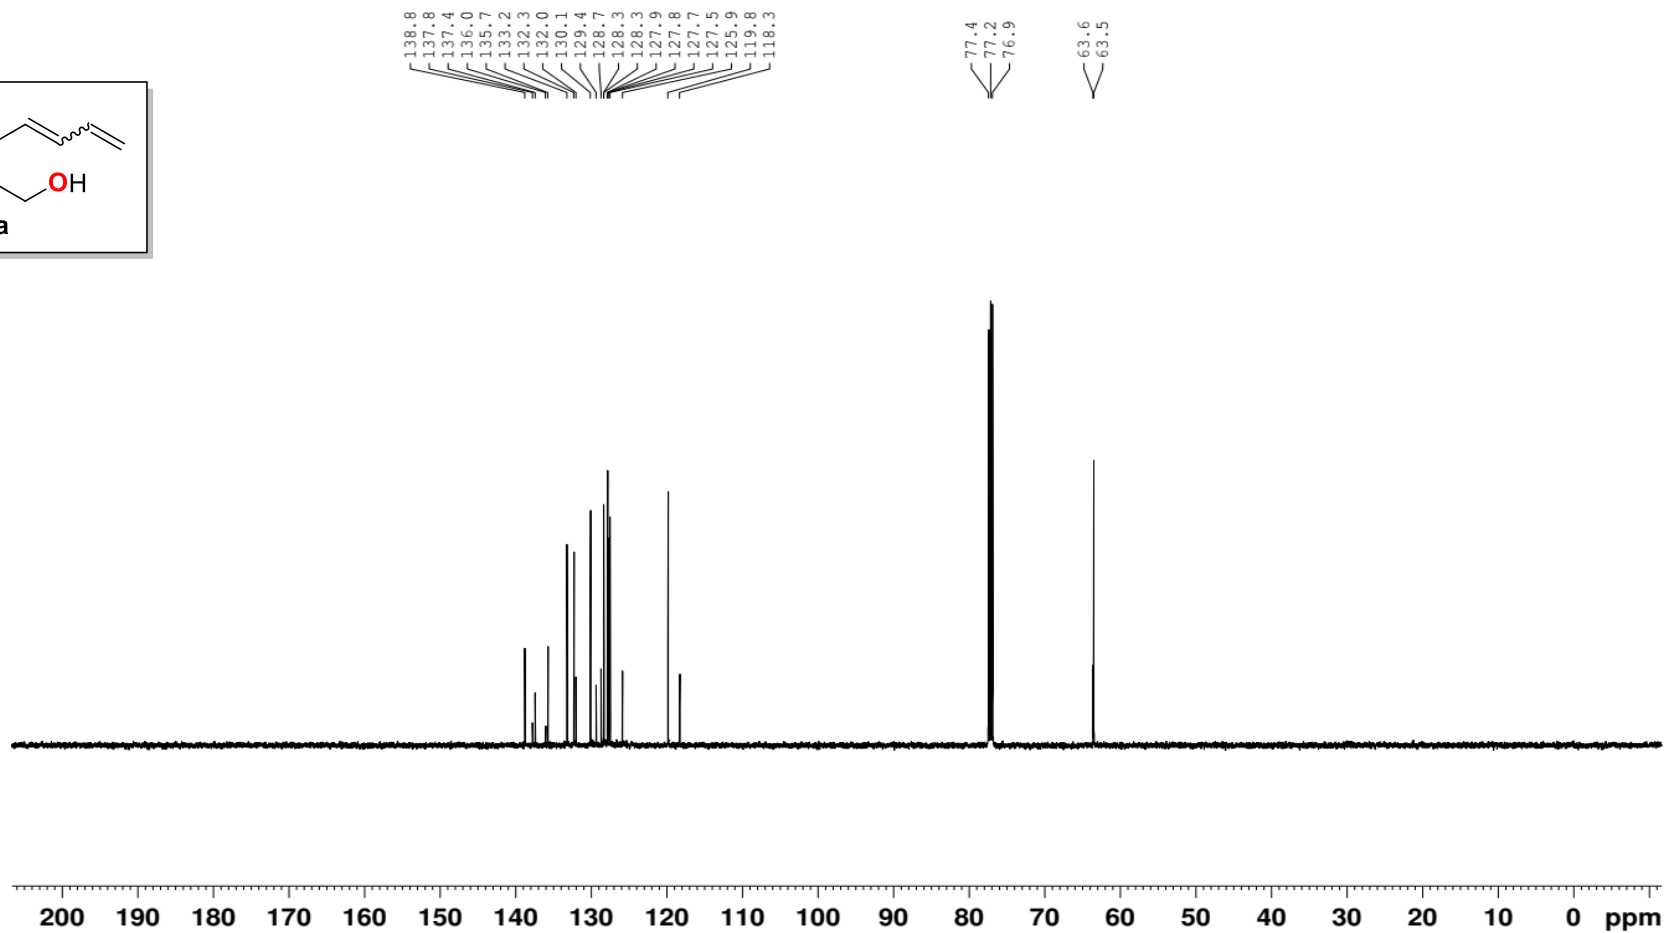

hy-S-E-1a <sup>1</sup>H NMR (400MHz CDCl<sub>3</sub>)

hy-yuan-diene-E

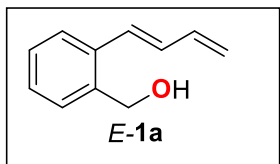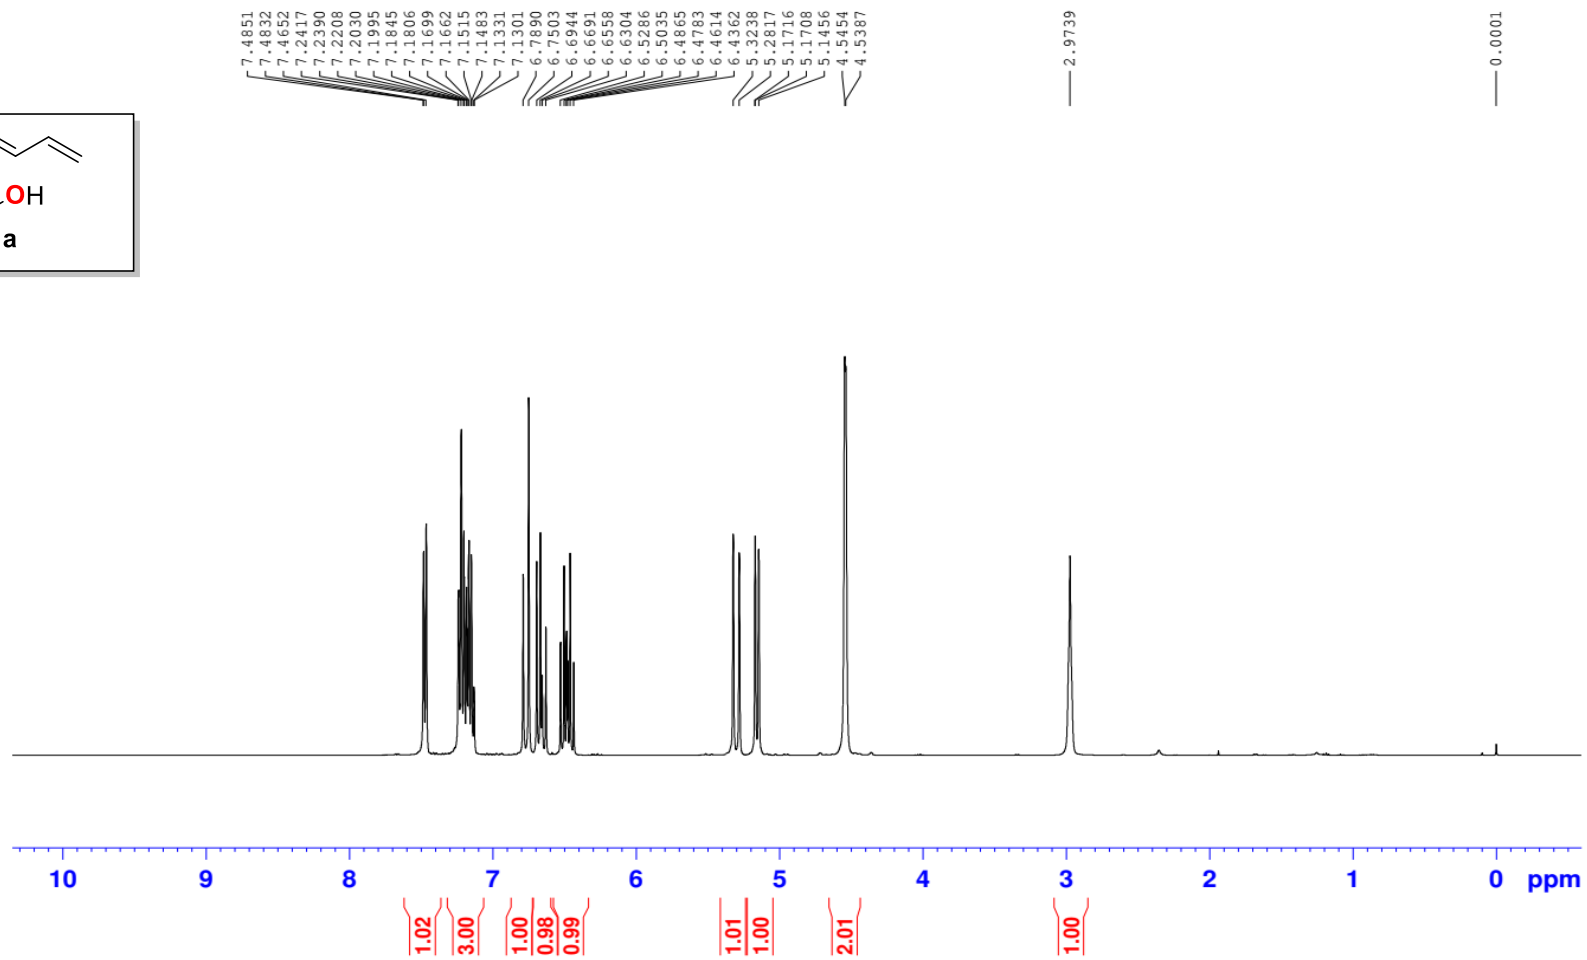

hy-S-E-1a <sup>13</sup>C NMR (100MHz CDCl<sub>3</sub>)

hy-yuan-diene-E-c

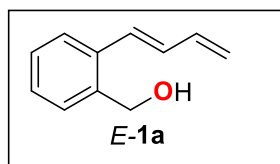

137.7  
137.4  
135.6  
131.6  
129.3  
128.4  
127.9  
125.5  
118.0

77.5  
77.2  
76.8

62.8

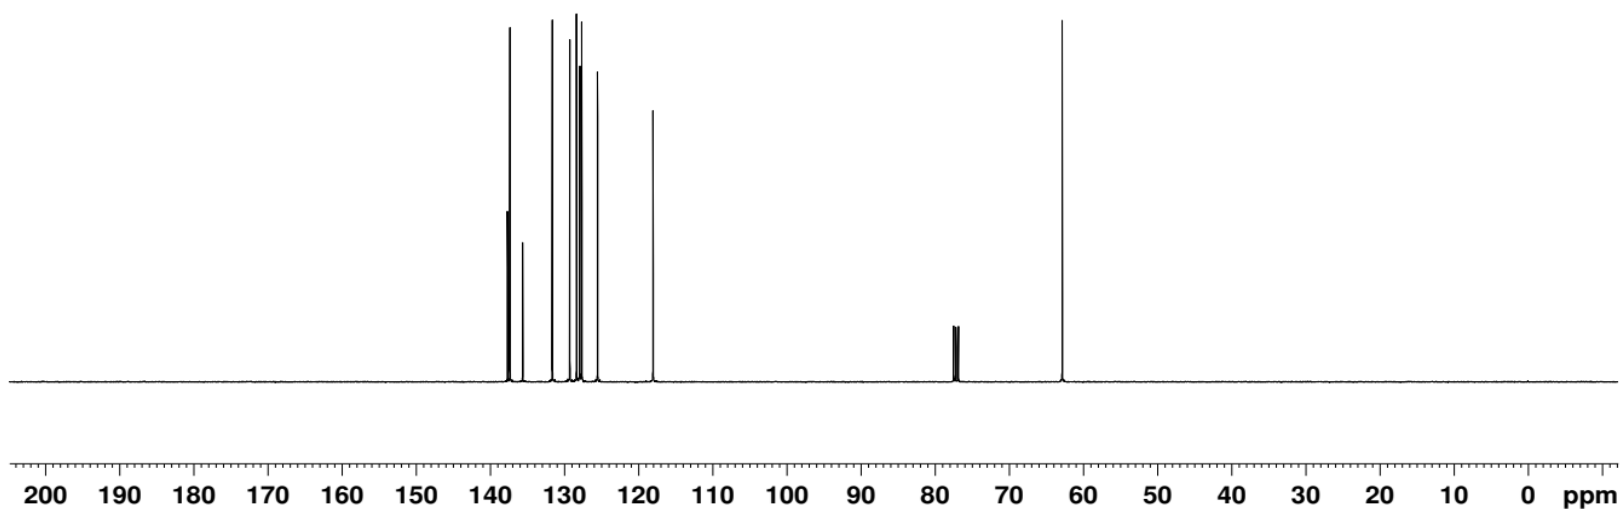

hy-S-1b <sup>1</sup>H NMR (500MHz CDCl<sub>3</sub>)

hy-yuan-diene-4-ch3-b-2

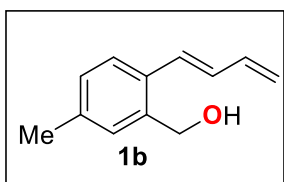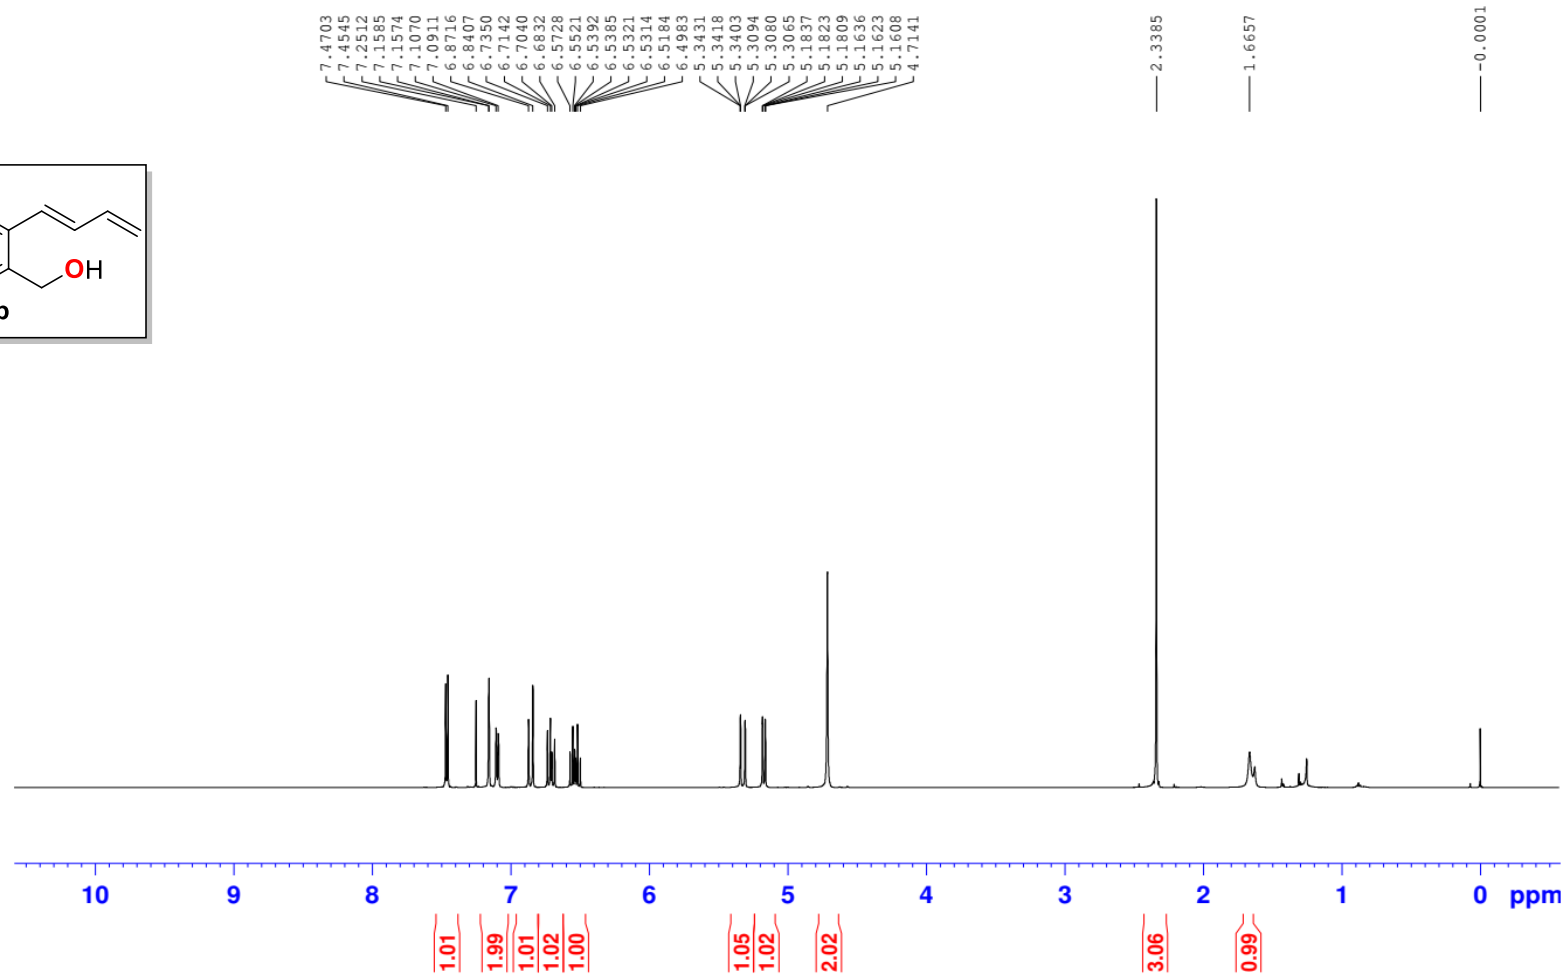

hy-S-1b <sup>13</sup>C NMR (125MHz CDCl<sub>3</sub>)

hy-yuan-diene-4-ch3-c-

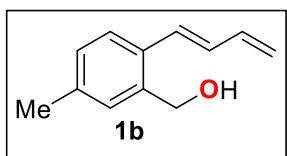

137.8  
137.6  
137.6  
133.1  
131.2  
129.5  
128.3  
129.1  
125.8  
117.8

77.4  
77.2  
76.9

63.6

21.3

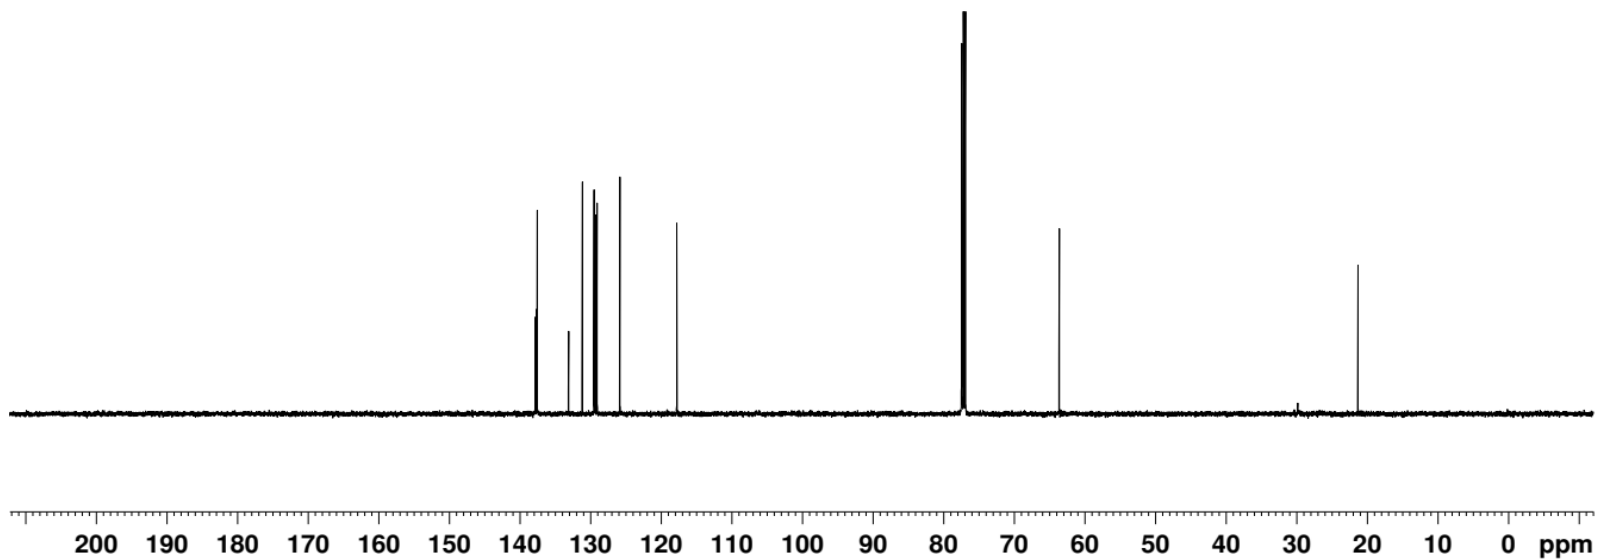

hy-S-1c <sup>1</sup>H NMR (500MHz CDCl<sub>3</sub>)

hy-yuan-diene-4-ome--

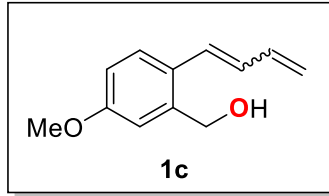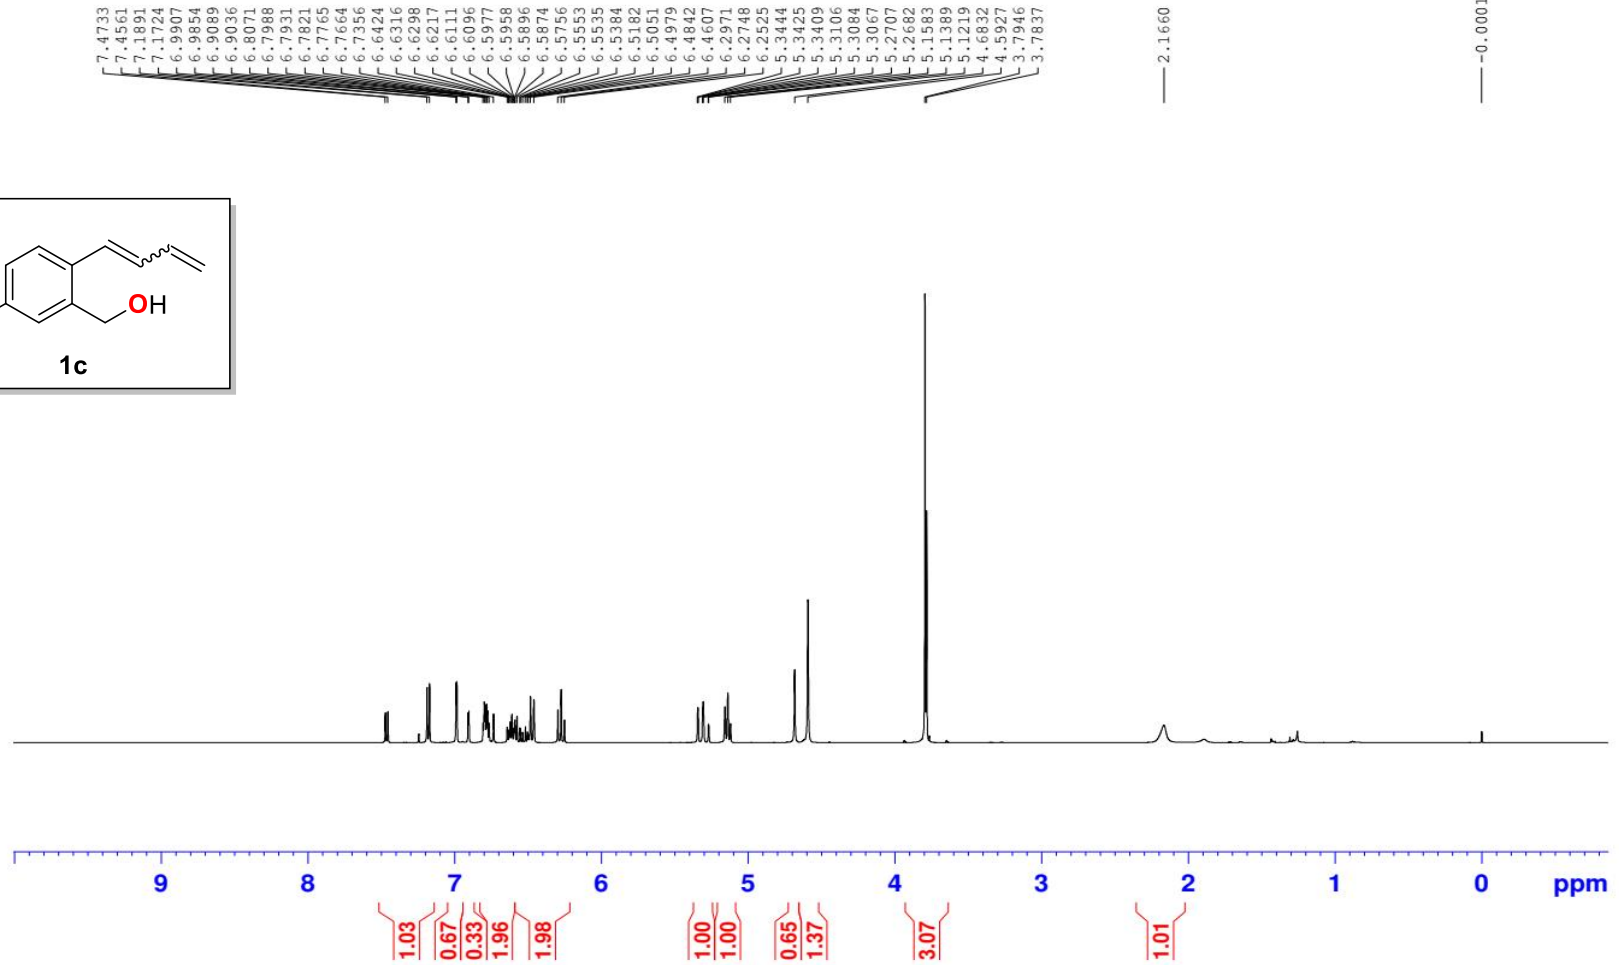



hy-S-1c <sup>13</sup>C NMR (125MHz CDCl<sub>3</sub>)

hy-yuan-diene-4-ome-

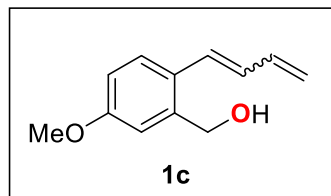

159.4  
159.2  
140.4  
139.4  
137.6  
133.4  
131.4  
131.2  
130.1  
128.9  
128.2  
127.8  
127.1  
119.2  
117.1  
113.7  
113.5  
113.0  
112.6

77.4  
77.2  
76.9  
63.2  
55.4

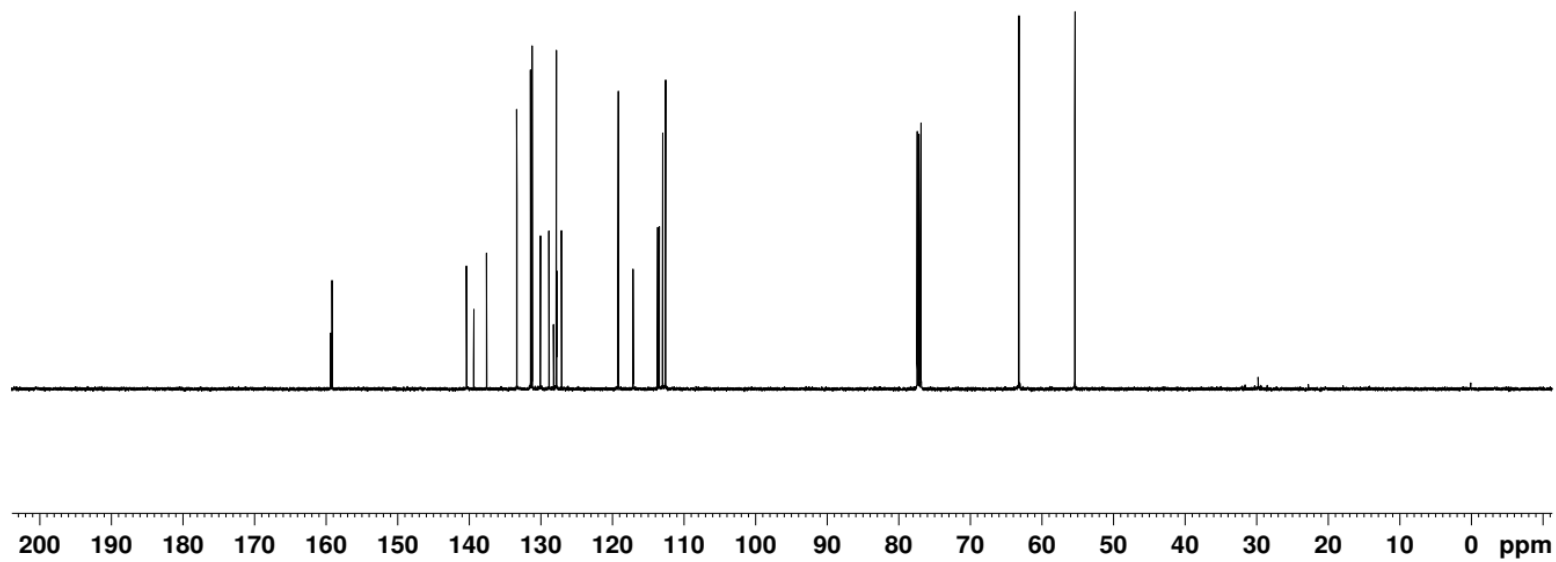

hy-S-1d <sup>1</sup>H NMR (500MHz CDCl<sub>3</sub>)

hy-yuan-diene-5-ome-h-

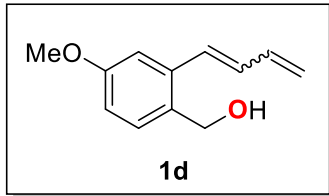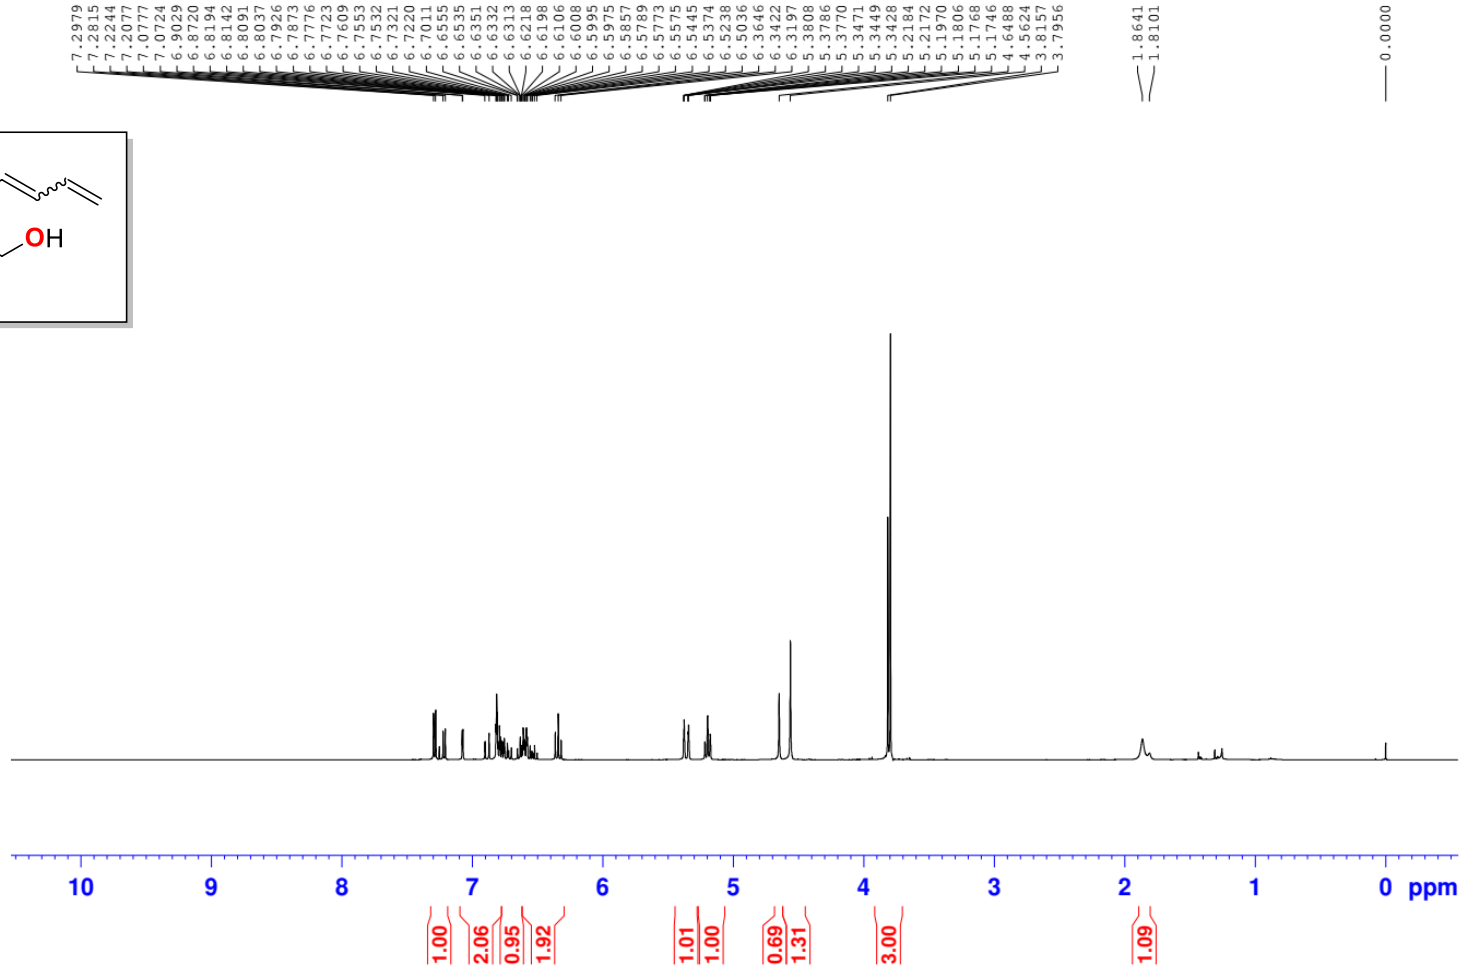

hy-S-1d <sup>13</sup>C NMR (125MHz CDCl<sub>3</sub>)

hy-yuan-diene-5-ome-

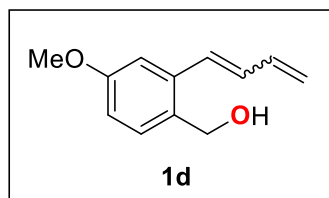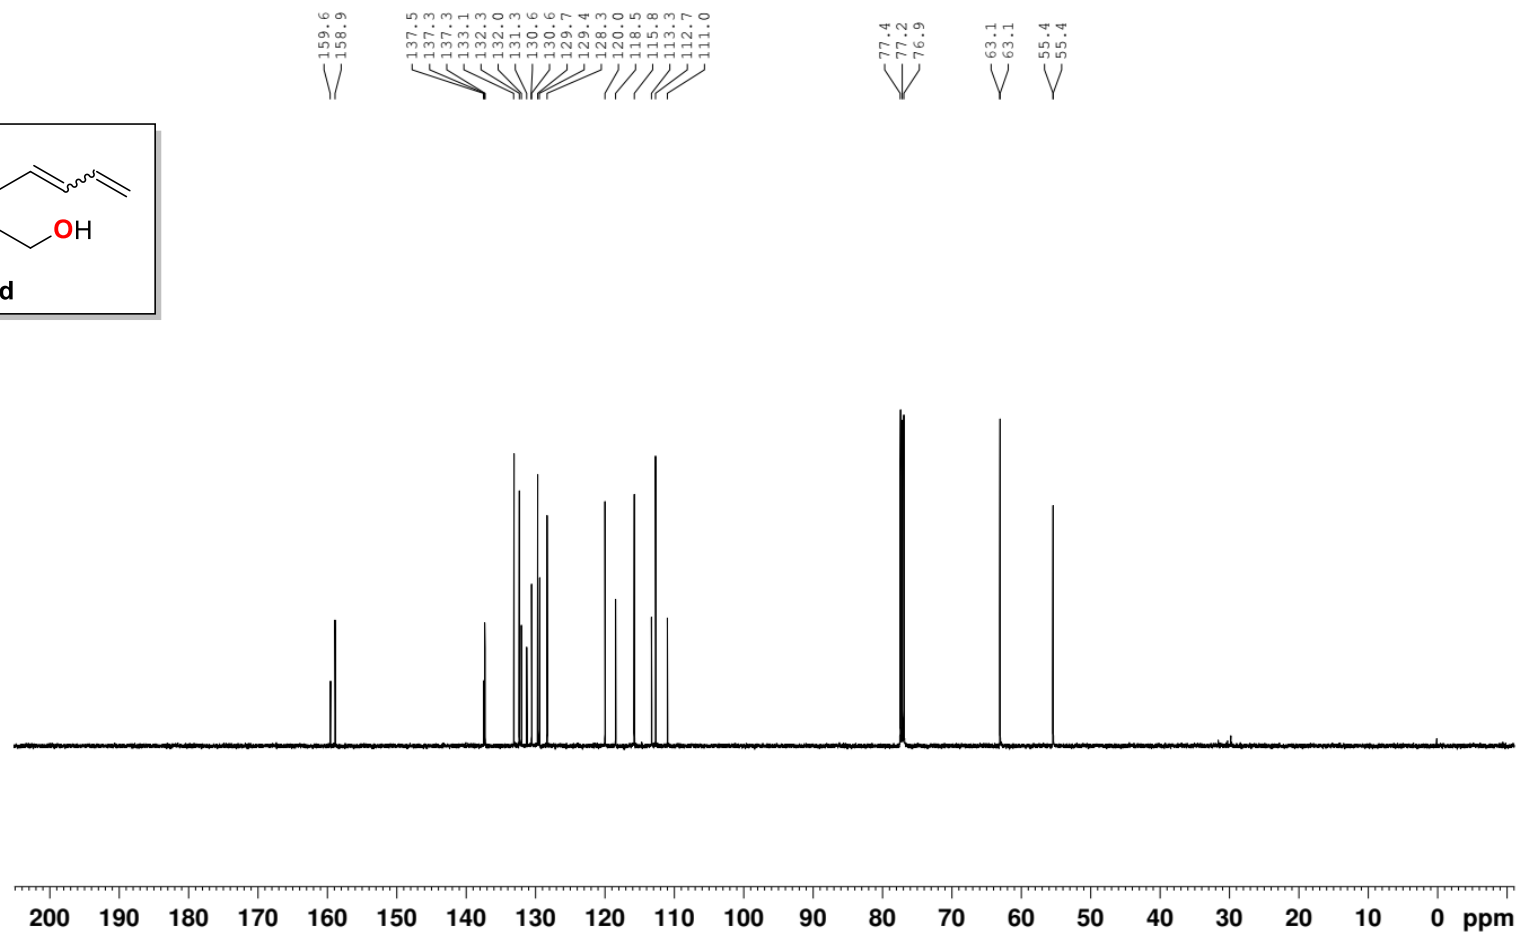

hy-S-1e <sup>1</sup>H NMR (500MHz CDCl<sub>3</sub>)

hy-yuan-diene-5-otbs---

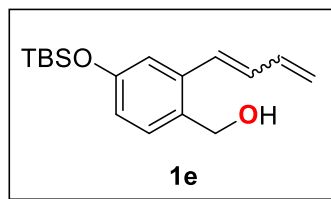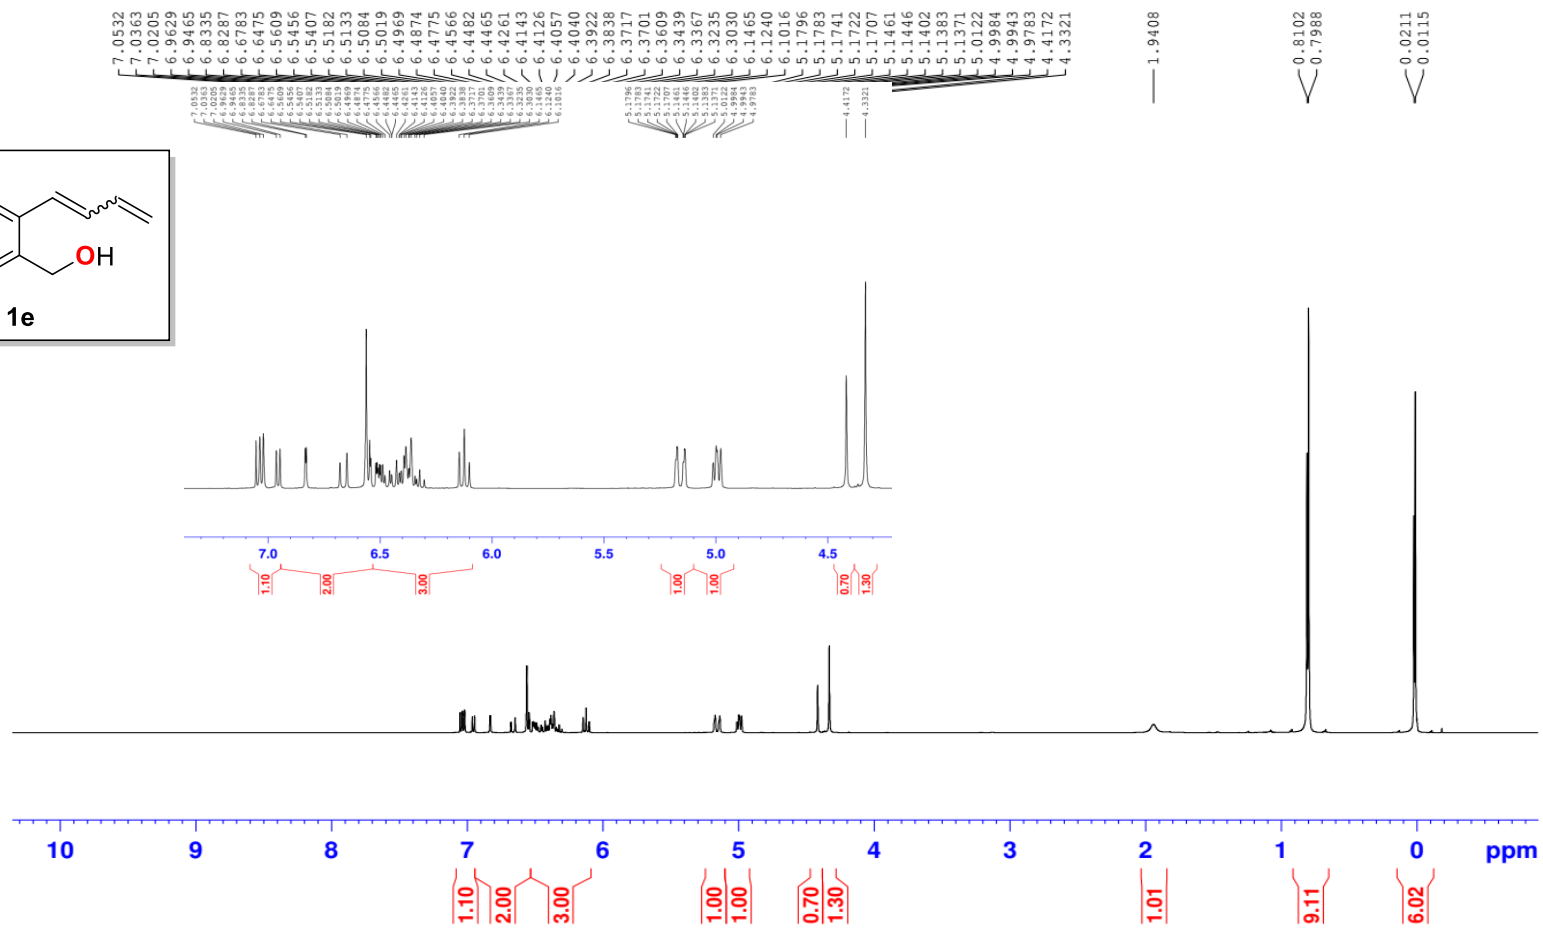

hy-S-1e <sup>13</sup>C NMR (125MHz CDCl<sub>3</sub>)

hy-yuan-diene-5-otbs-c-

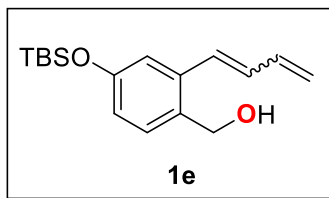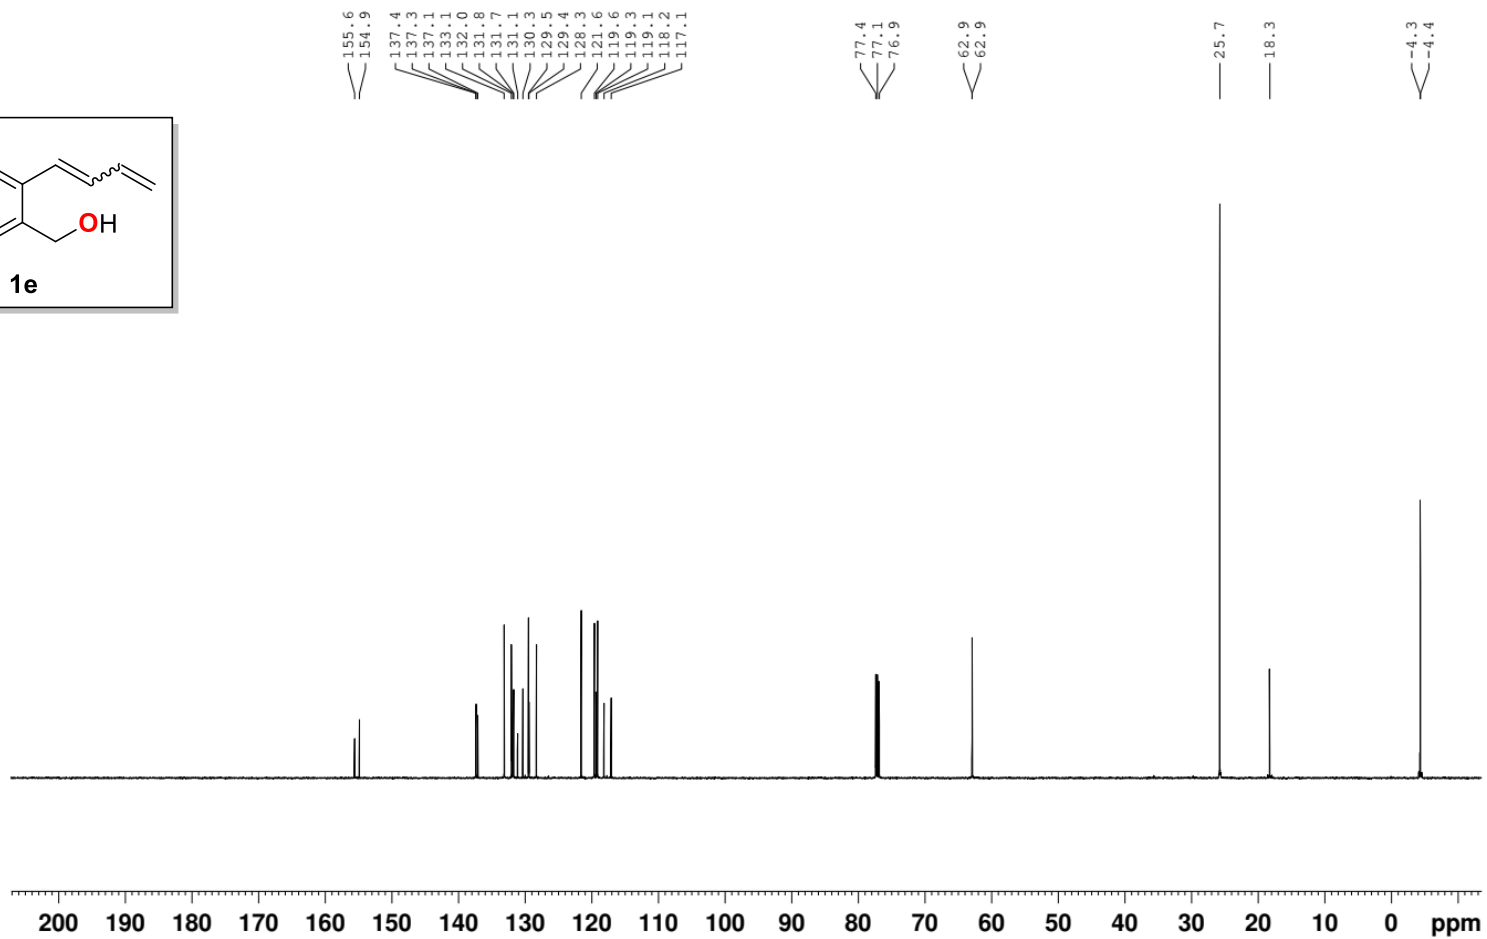

hy-S-1f <sup>1</sup>H NMR (400MHz CDCl<sub>3</sub>)

hy-yuan-diene-4,5-ome-h-3

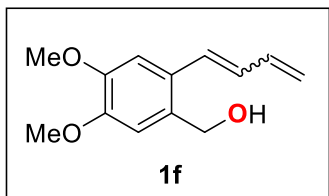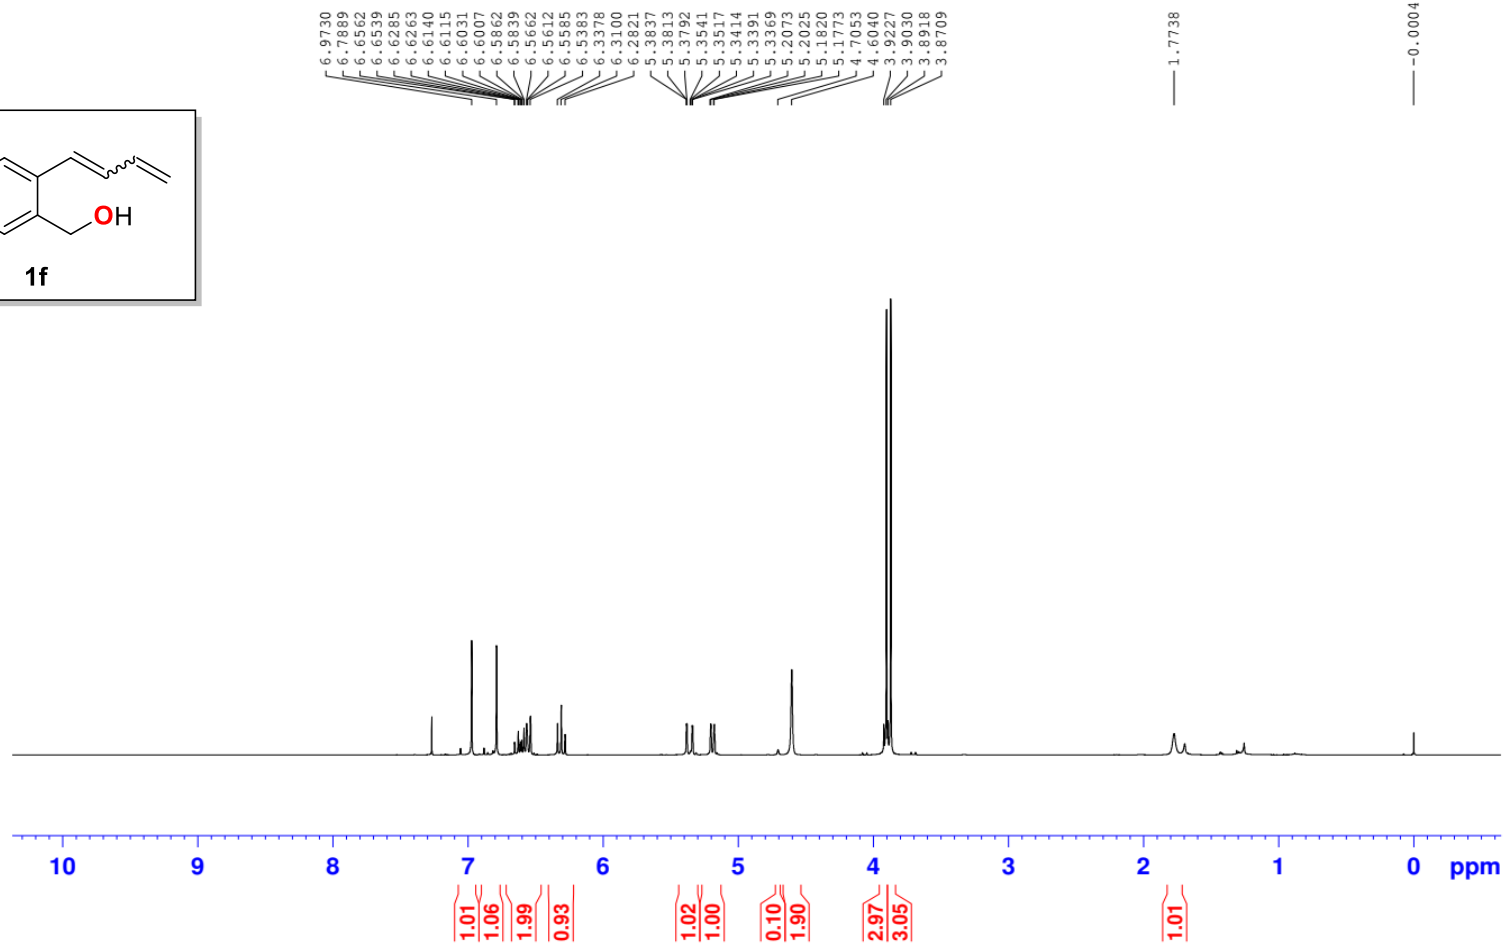

hy-S-1f <sup>13</sup>C NMR (100MHz CDCl<sub>3</sub>)

hy-yuan-diene-4,5-c-

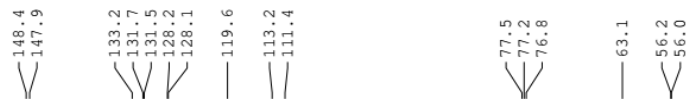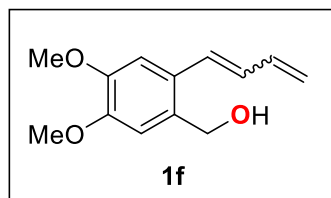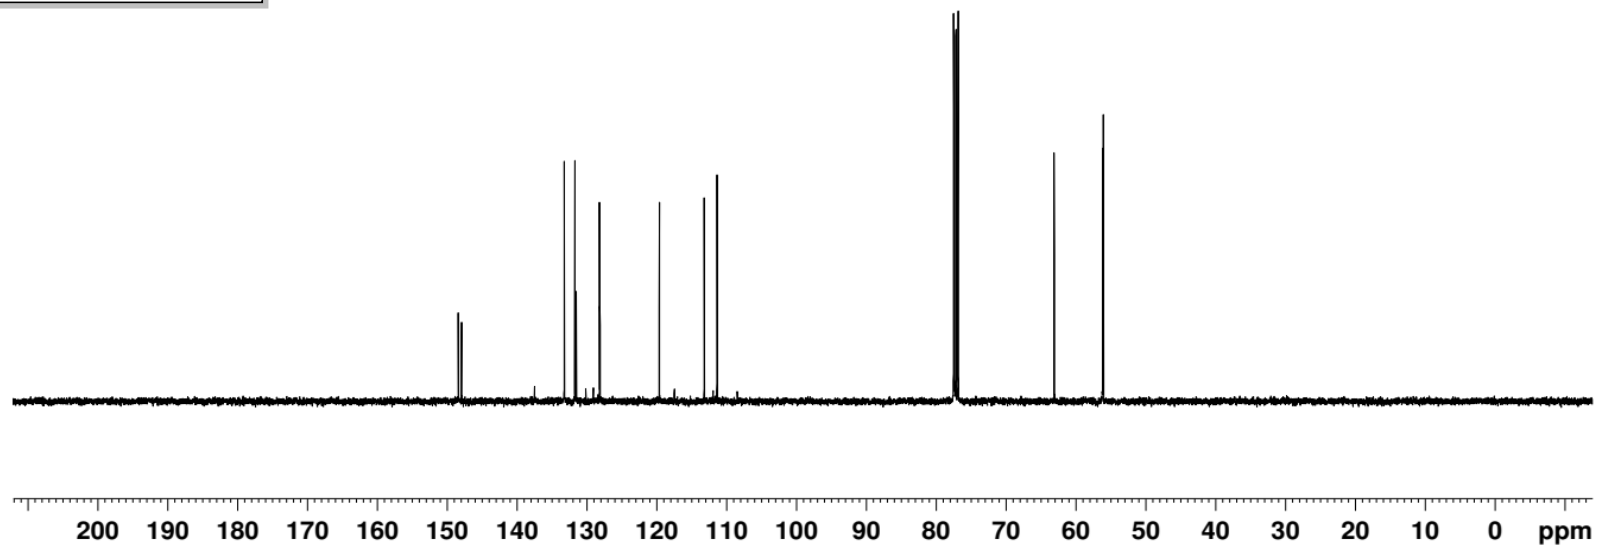

hy-S-1g <sup>1</sup>H NMR (400MHz CDCl<sub>3</sub>)

hy-yuan-diene-4-f-h--

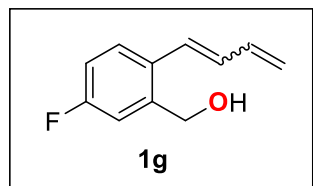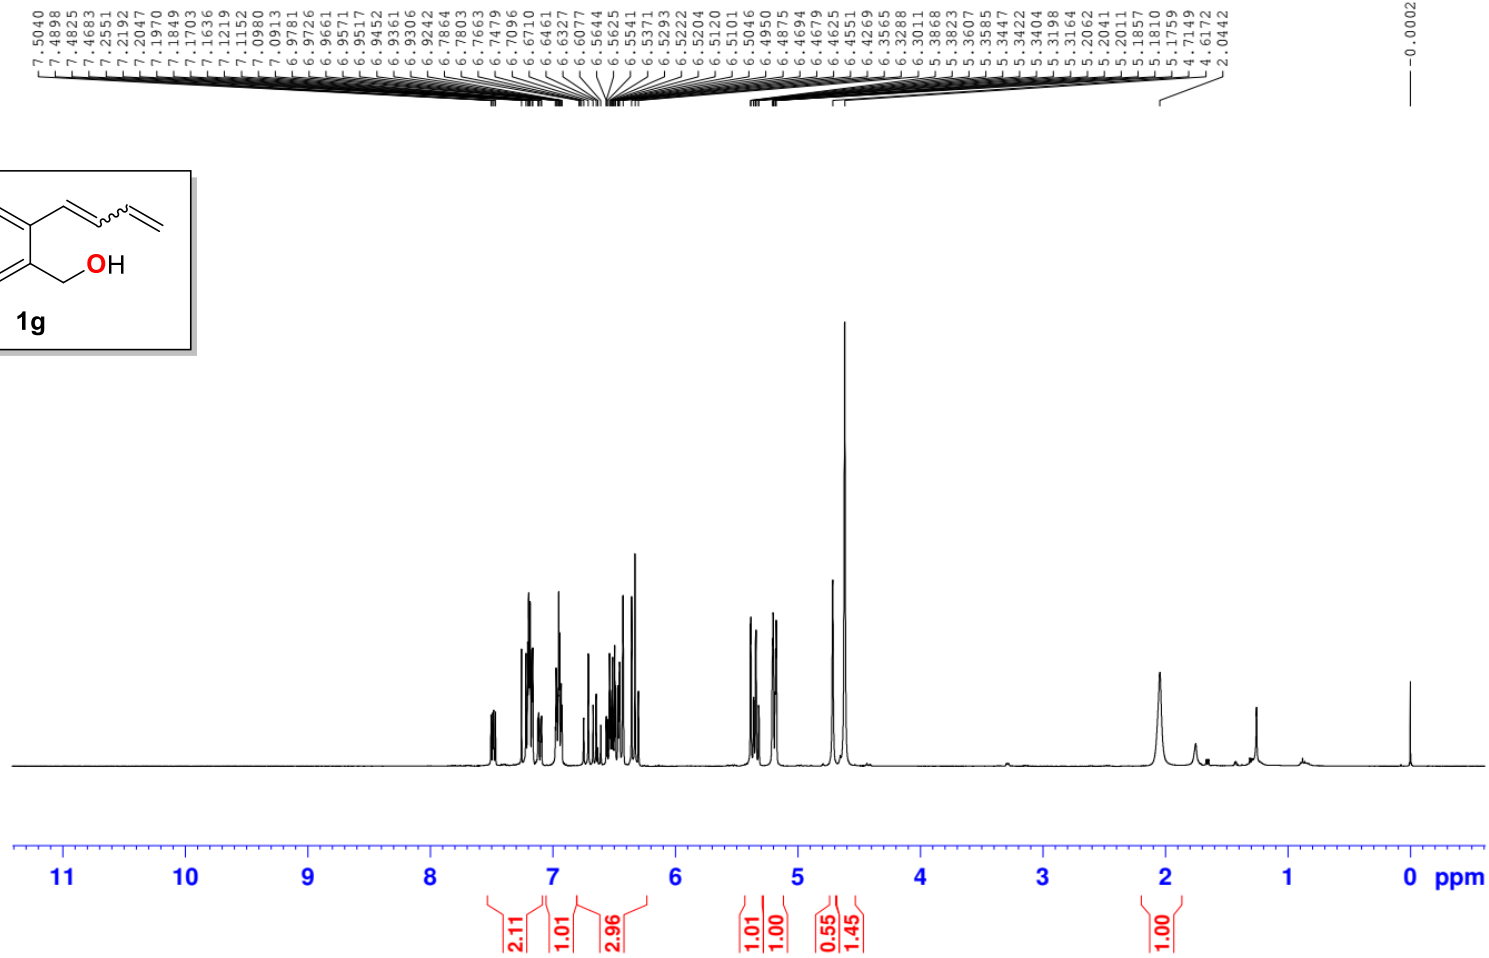

— 0.0002



hy-S-1g <sup>13</sup>C NMR (100MHz CDCl<sub>3</sub>)

hy-yuan-diene-4-f-c-

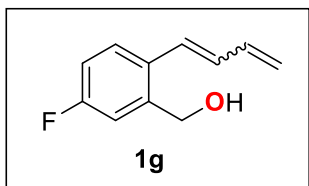

163.7  
163.6  
161.2  
161.2  
141.3  
140.1  
140.1  
137.2  
132.9  
132.5  
131.8  
131.8  
131.6  
131.5  
131.1  
131.0  
128.1  
127.6  
127.5  
127.1  
120.1  
118.4  
115.0  
114.8  
114.7  
114.6  
114.3  
114.0  
113.8

77.5  
77.2  
76.8

62.7  
62.7

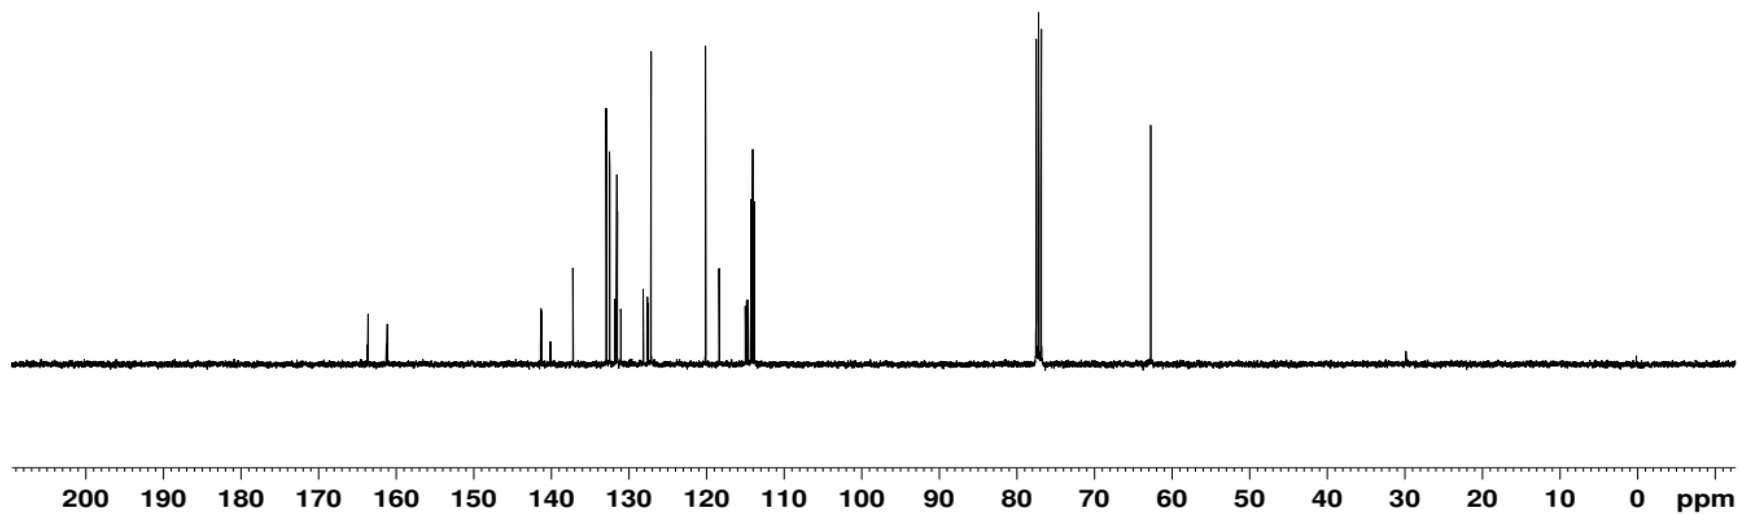

hy-S-1g <sup>19</sup>F NMR (376MHz CDCl<sub>3</sub>)

hy-yuan-diene-4-f-f

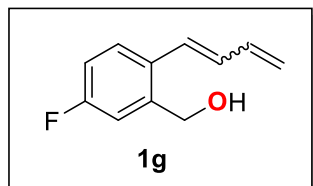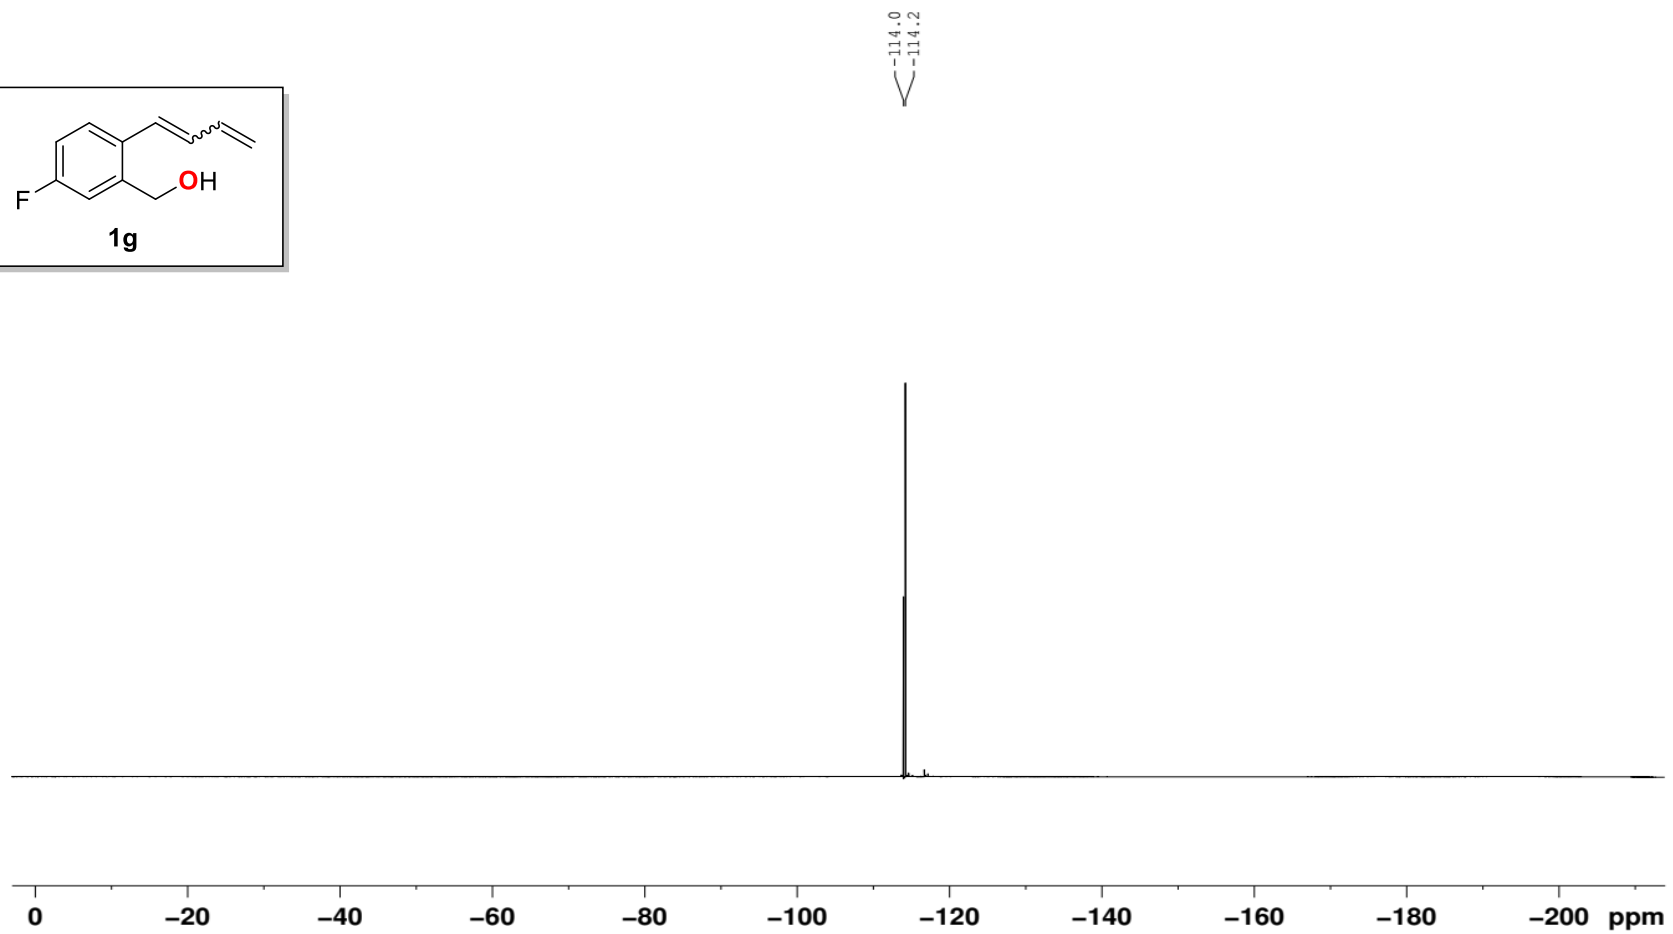

hy-S-1h <sup>1</sup>H NMR (500MHz CDCl<sub>3</sub>)

hy-yuan-diene-5-f-b-

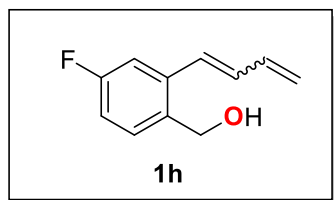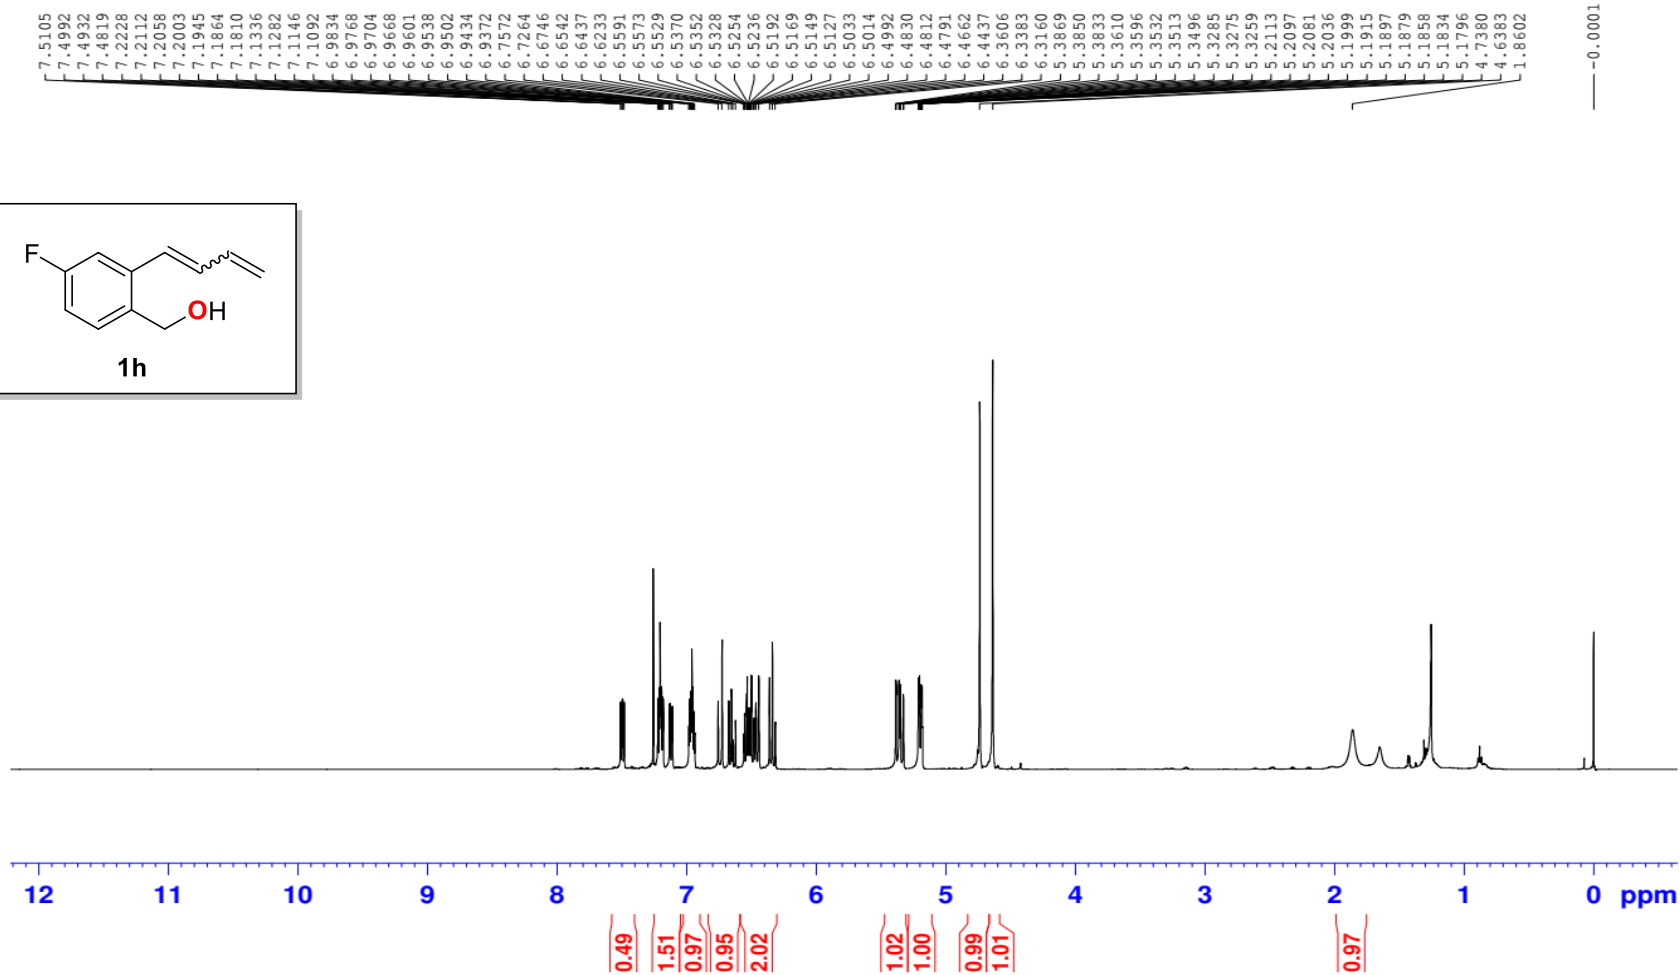

hy-S-1h <sup>13</sup>C NMR (125MHz CDCl<sub>3</sub>)

hy-yuan-diene-5-f-c-

163.5  
163.4  
161.5  
161.4  
141.4  
141.3  
140.1  
140.1  
137.2  
132.9  
132.5  
131.9  
131.6  
131.6  
131.5  
131.1  
131.1  
128.2  
127.6  
127.6  
127.2  
120.1  
118.4  
115.0  
114.9  
114.8  
114.7  
114.3  
114.1  
114.1  
113.9  
77.4  
77.2  
76.9  
62.8

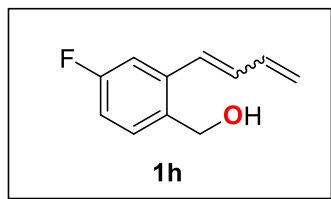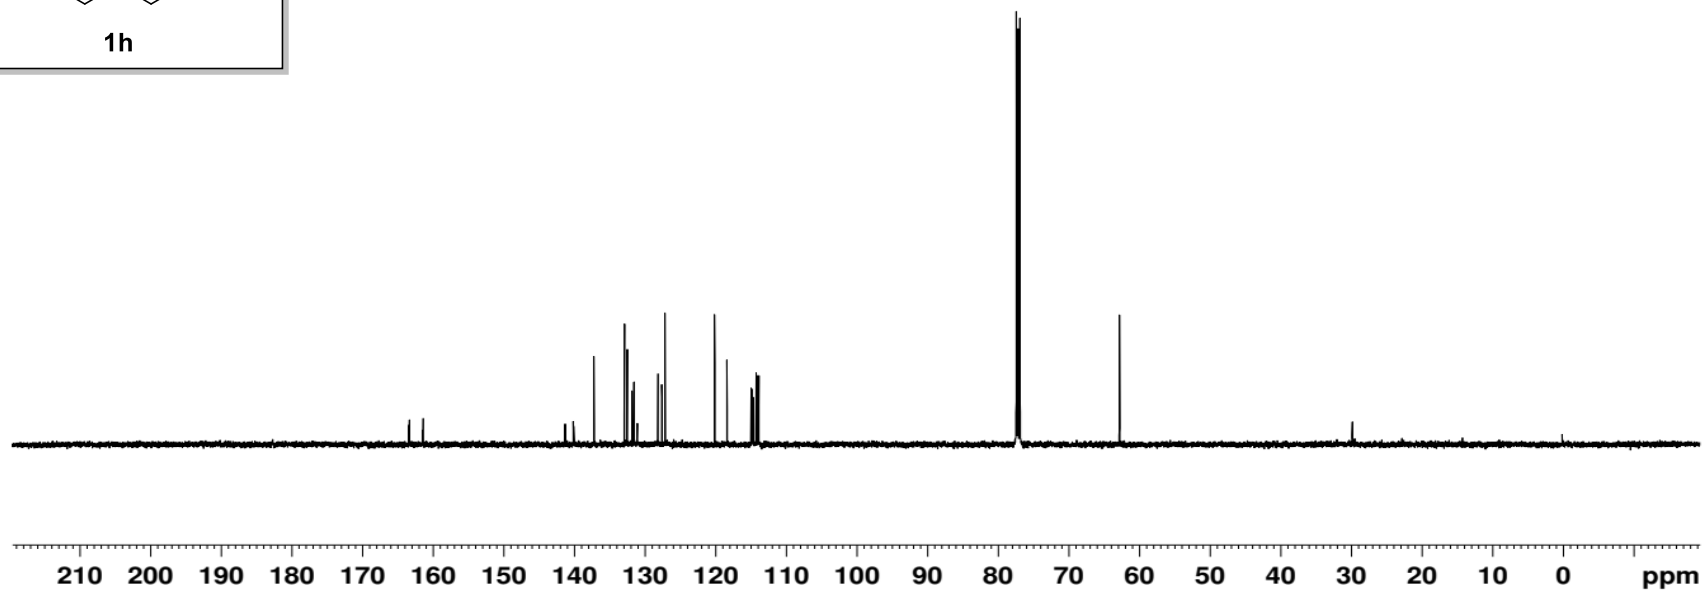

hy-S-1h <sup>19</sup>F NMR (470MHz CDCl<sub>3</sub>)

hy-yuan-diene-5-f-f

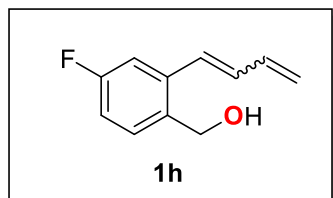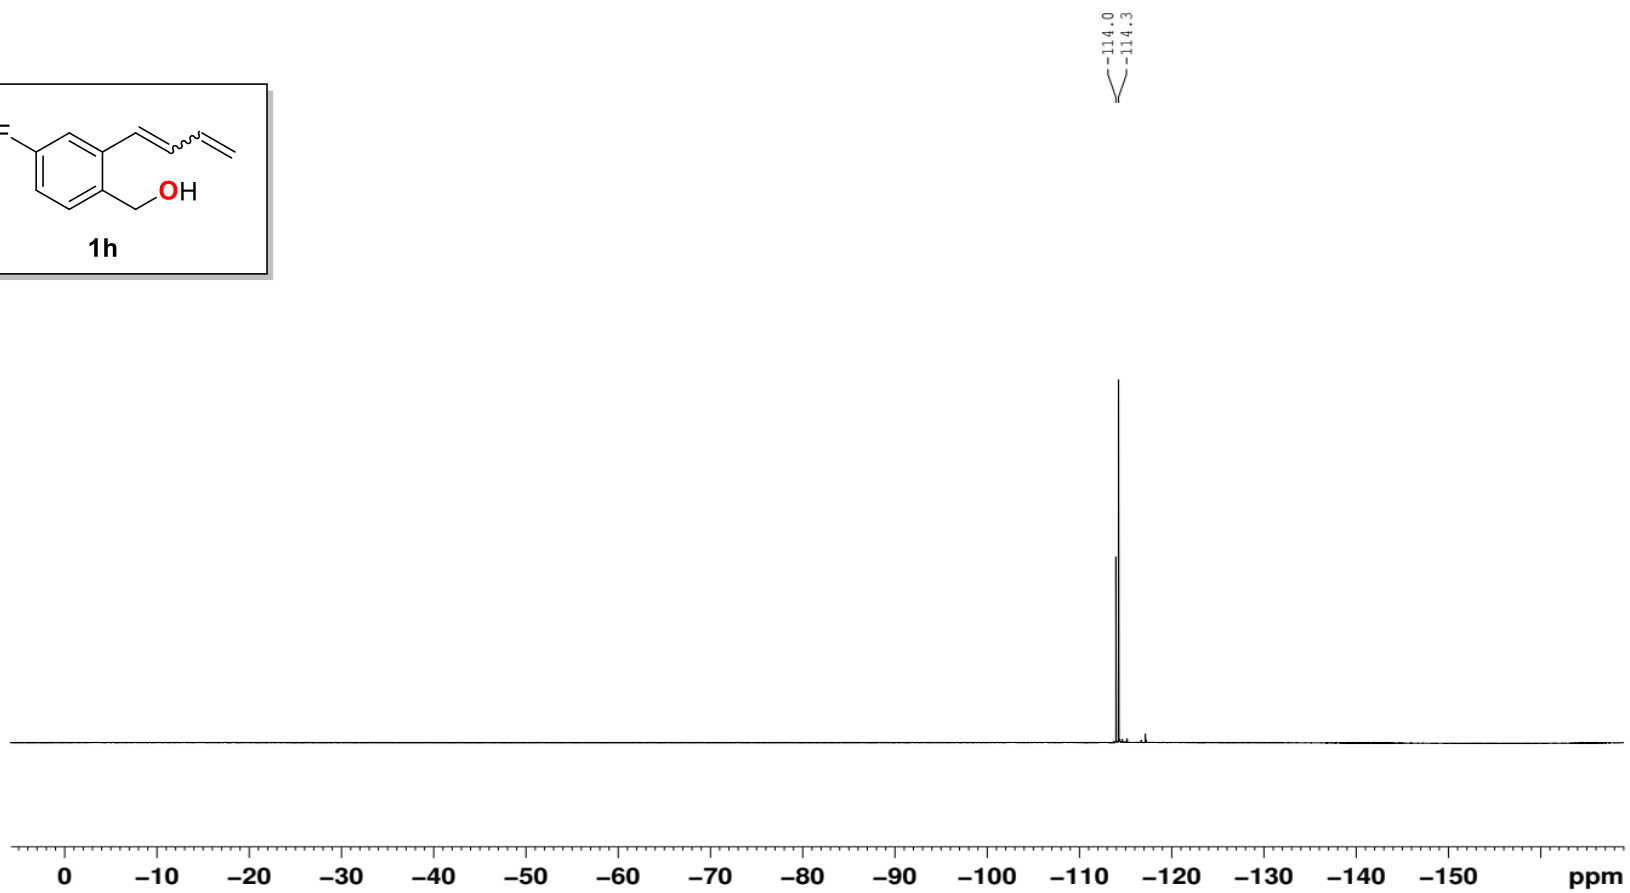



hy-S-1i <sup>13</sup>C NMR (100MHz CDCl<sub>3</sub>)

hy-yuan-diene-6-f-c-

162.3  
160.8  
159.8  
158.3  
141.4  
141.4  
140.4  
138.0  
136.9  
136.8  
134.7  
134.7  
133.3  
133.3  
129.0  
128.9  
128.3  
128.2  
124.1  
124.0  
123.8  
123.7  
123.3  
123.2  
123.0  
123.0  
122.9  
121.2  
120.3  
119.0  
115.7  
115.5  
114.9  
114.7  
77.5  
77.2  
76.8  
63.3  
63.3  
62.9  
62.9

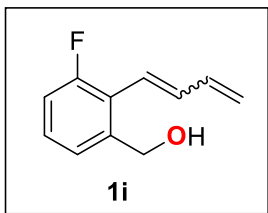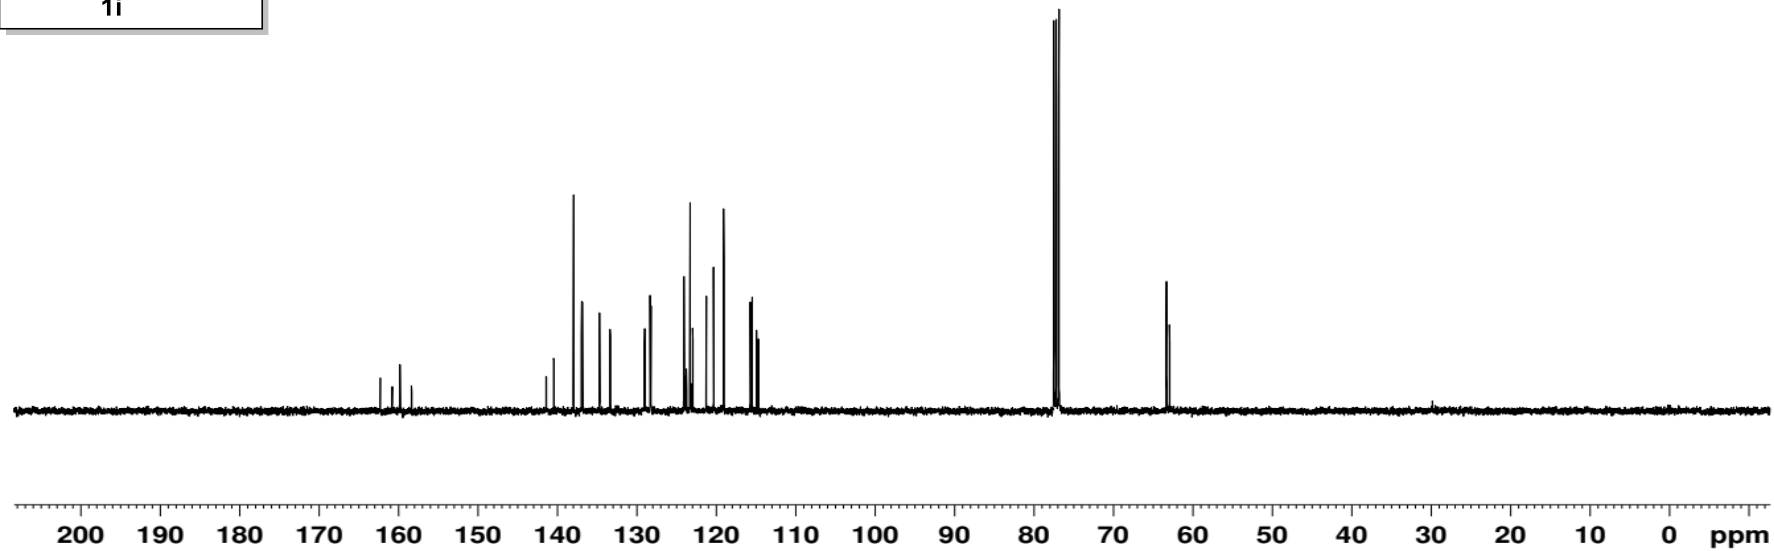

hy-S-1i <sup>19</sup>F NMR (376MHz CDCl<sub>3</sub>)

hy-yuan-diene-6-f--f

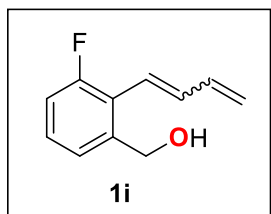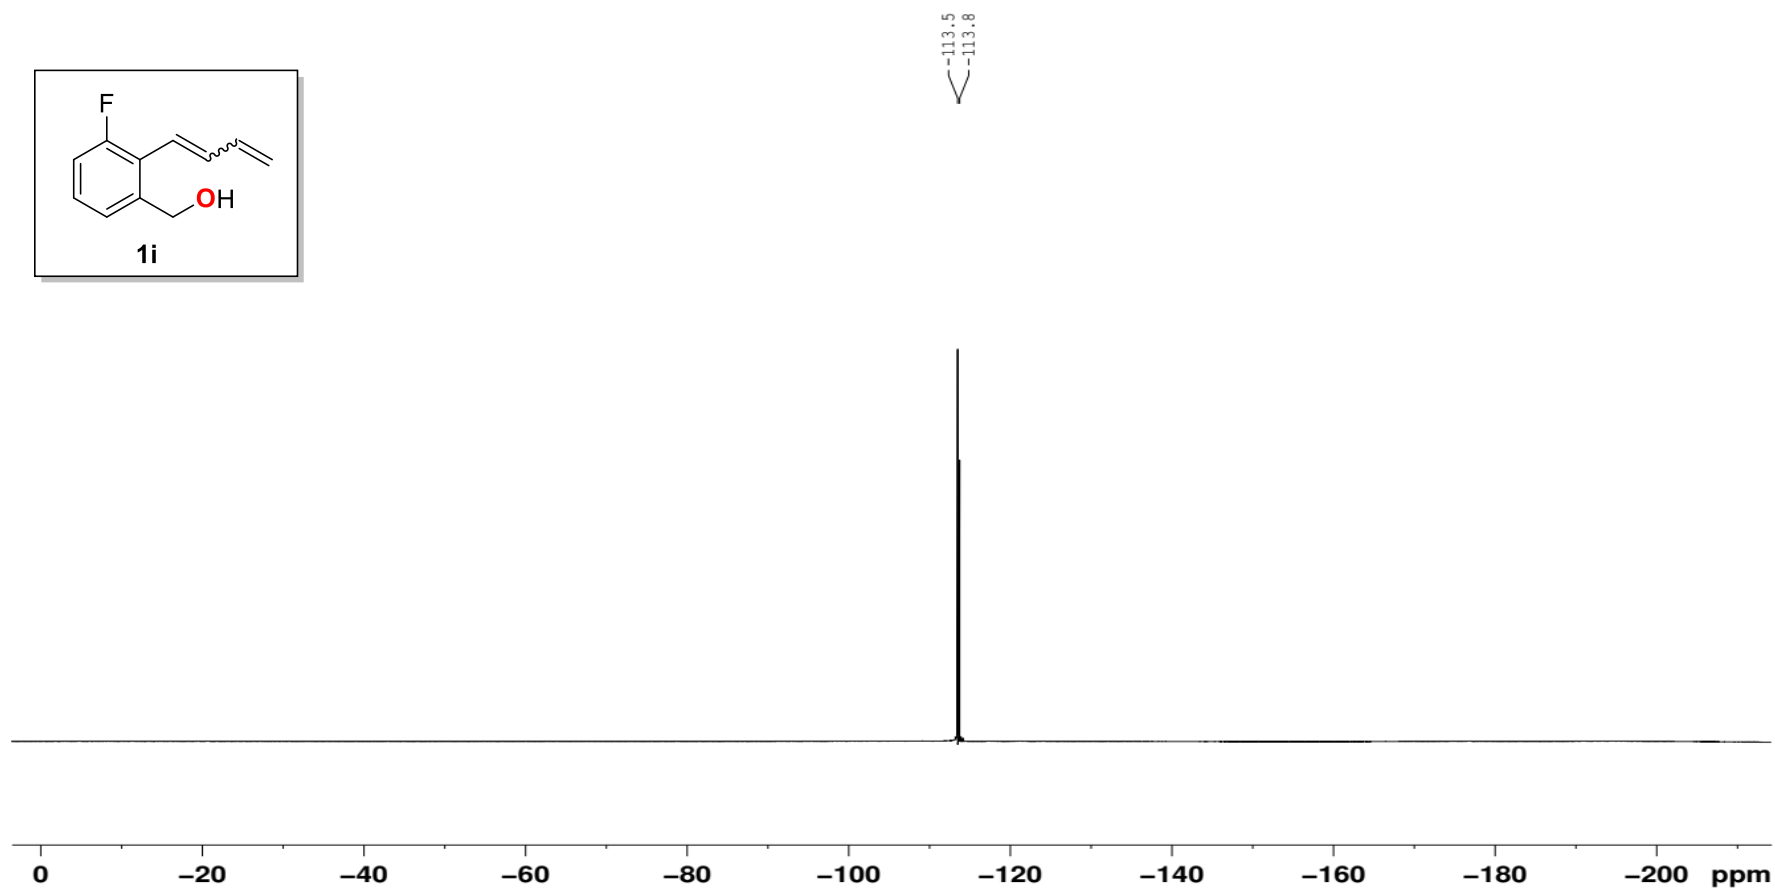



hy-S-1j <sup>1</sup>H NMR (500MHz CDCl<sub>3</sub>)

hy-yuan-diene-4-cl---

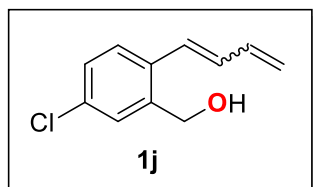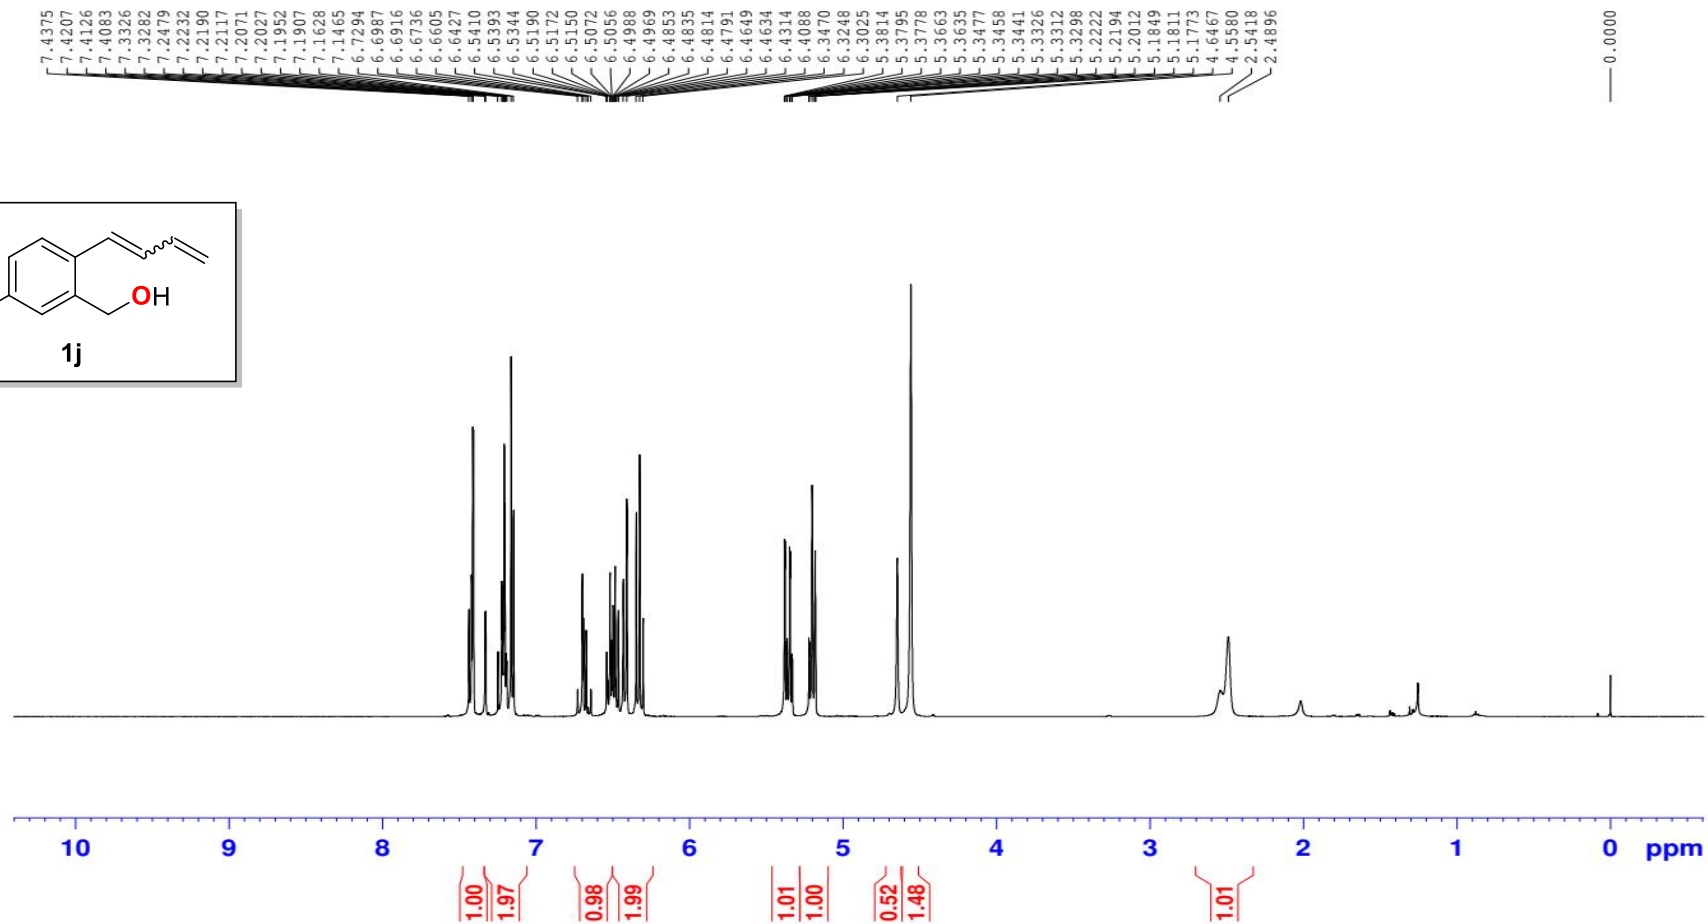

hy-S-1j <sup>13</sup>C NMR (125MHz CDCl<sub>3</sub>)

hy-yuan-diene-4-cl-b-c-

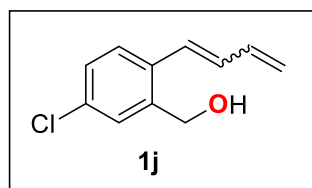

140.6  
139.4  
137.1  
134.0  
133.6  
133.4  
132.8  
132.7  
132.3  
131.2  
128.0  
128.0  
127.3  
127.2  
127.0  
126.9  
120.4  
118.8

77.4  
77.2  
76.9

62.6  
62.5

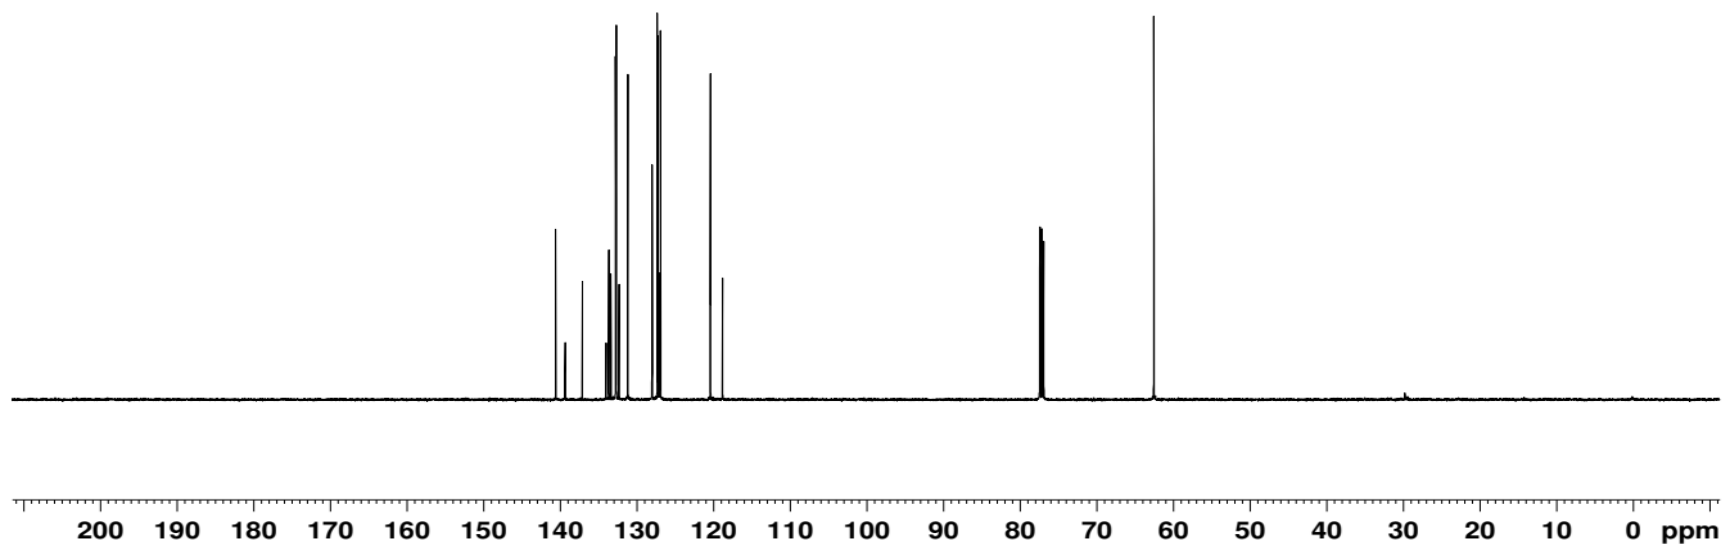

hy-S-1k <sup>1</sup>H NMR (500MHz CDCl<sub>3</sub>)

hy-yuan-diene-5-cf3---

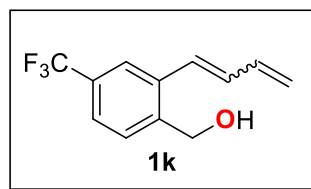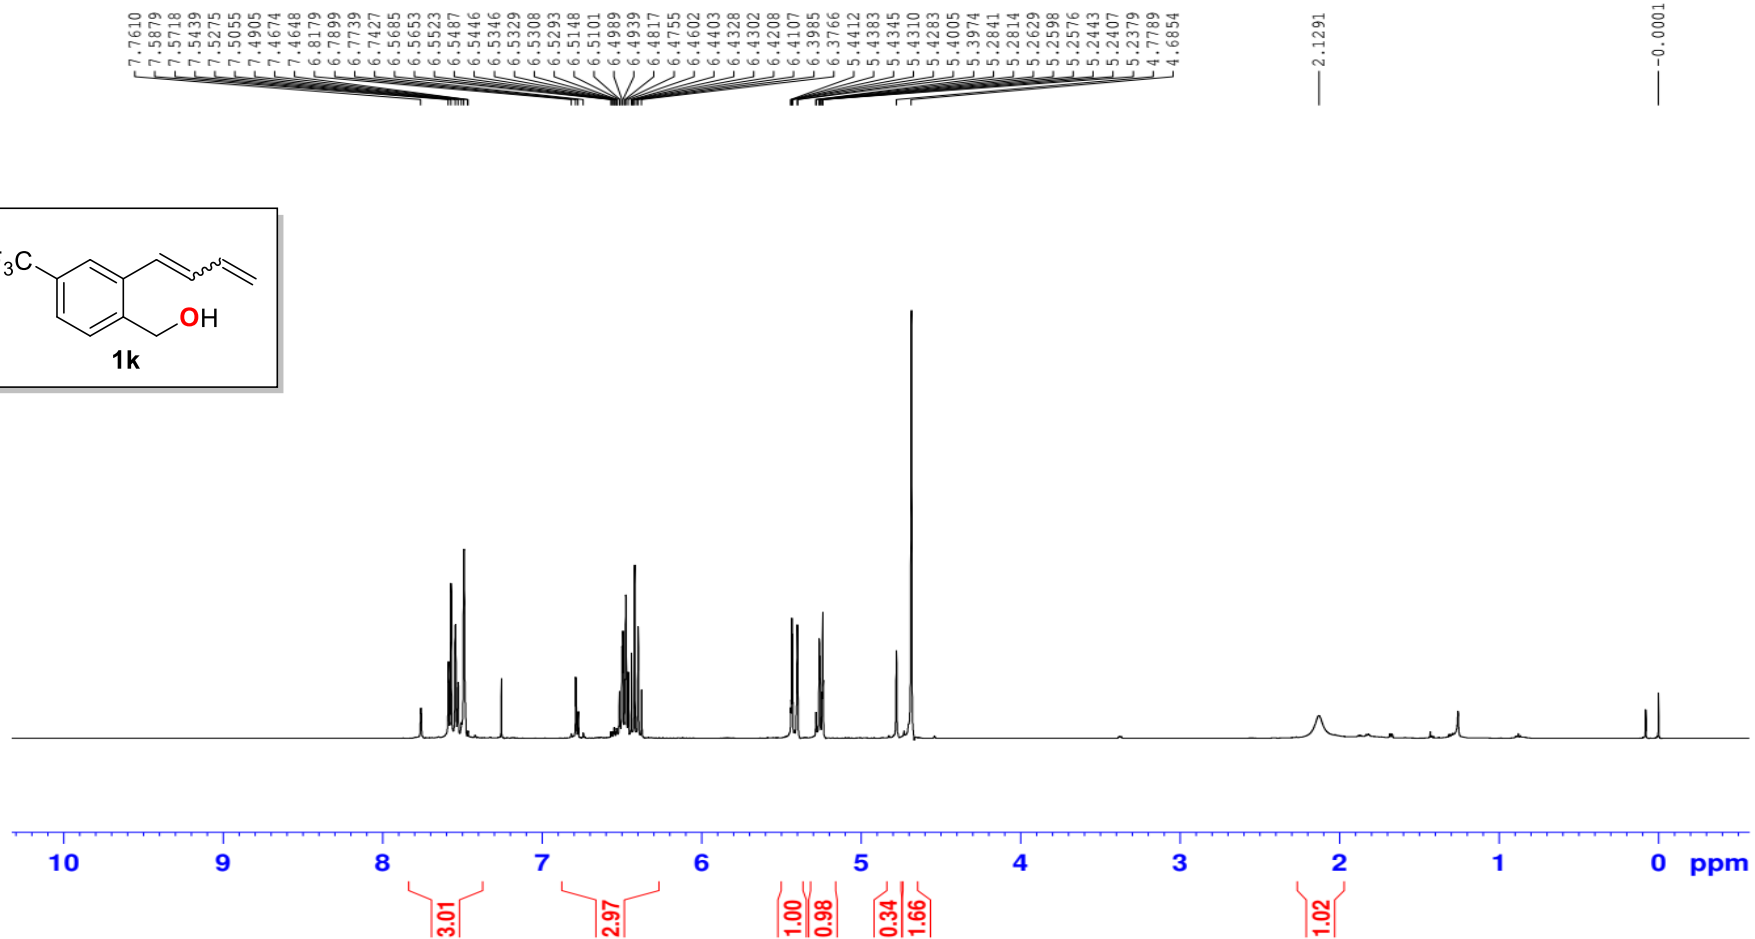

hy-S-1k <sup>13</sup>C NMR (125MHz CDCl<sub>3</sub>)

hy-yuan-diene-5-cf3-2-c

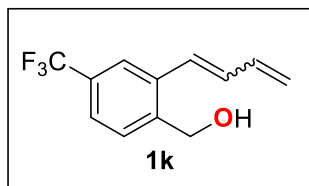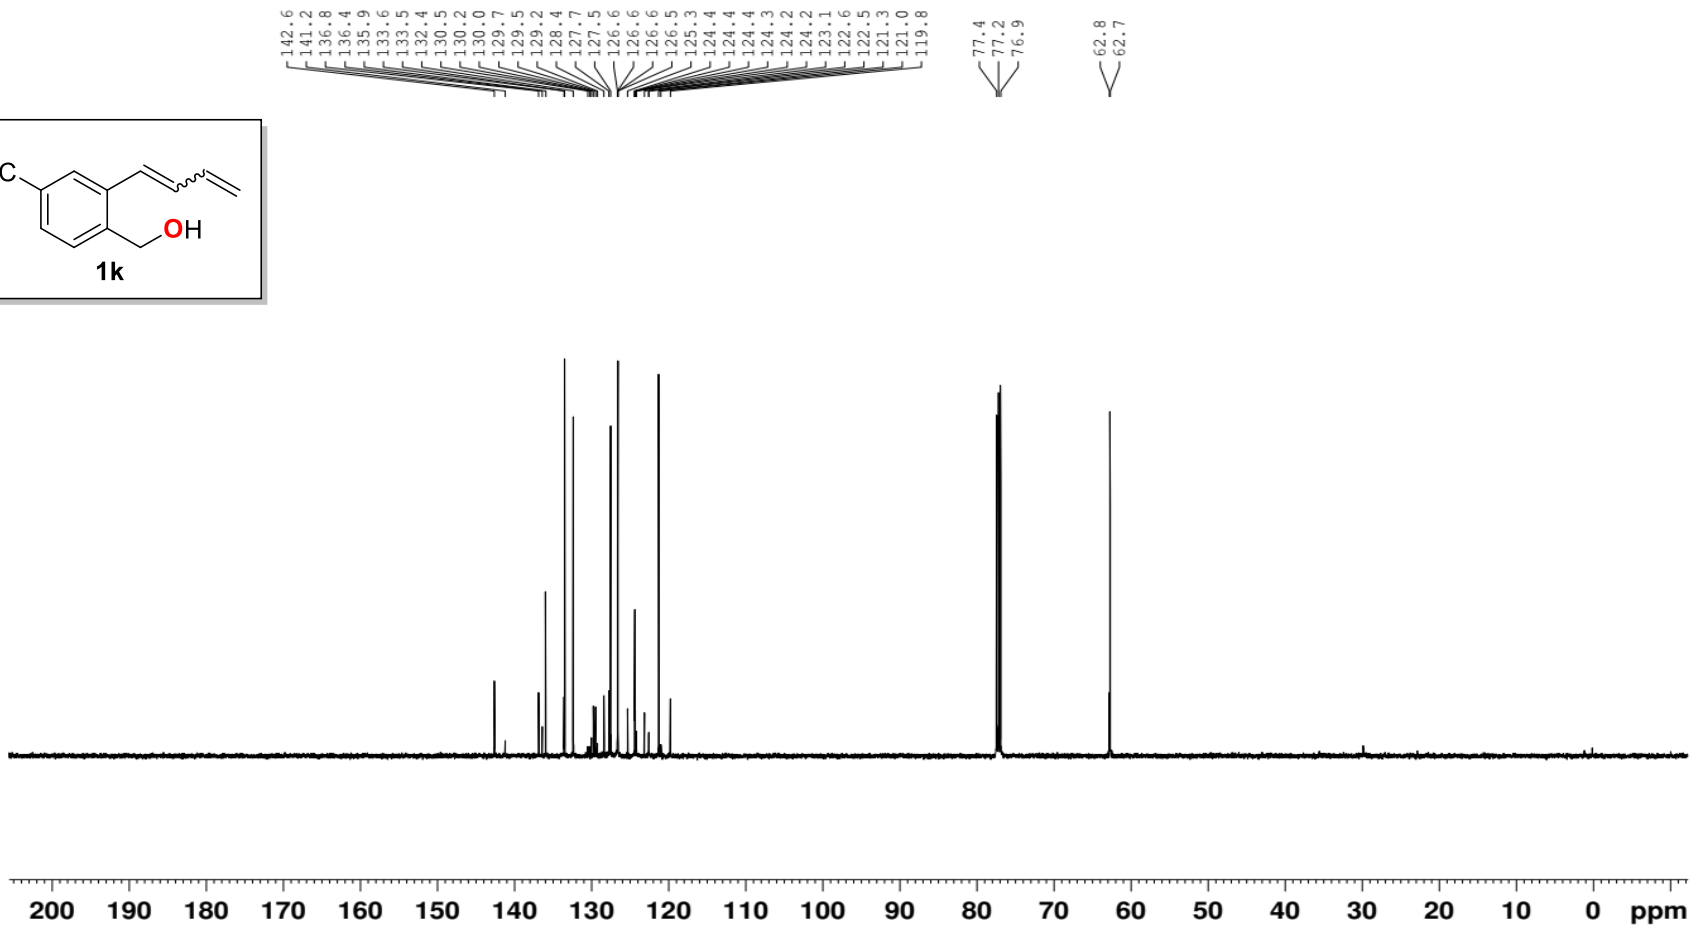

hy-S-1k <sup>19</sup>F NMR (470MHz CDCl<sub>3</sub>)

hy-yuan-diene-5-cf3-f

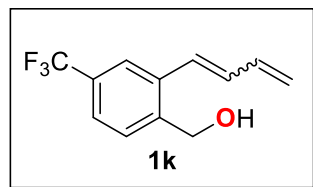

-62.5  
-62.6

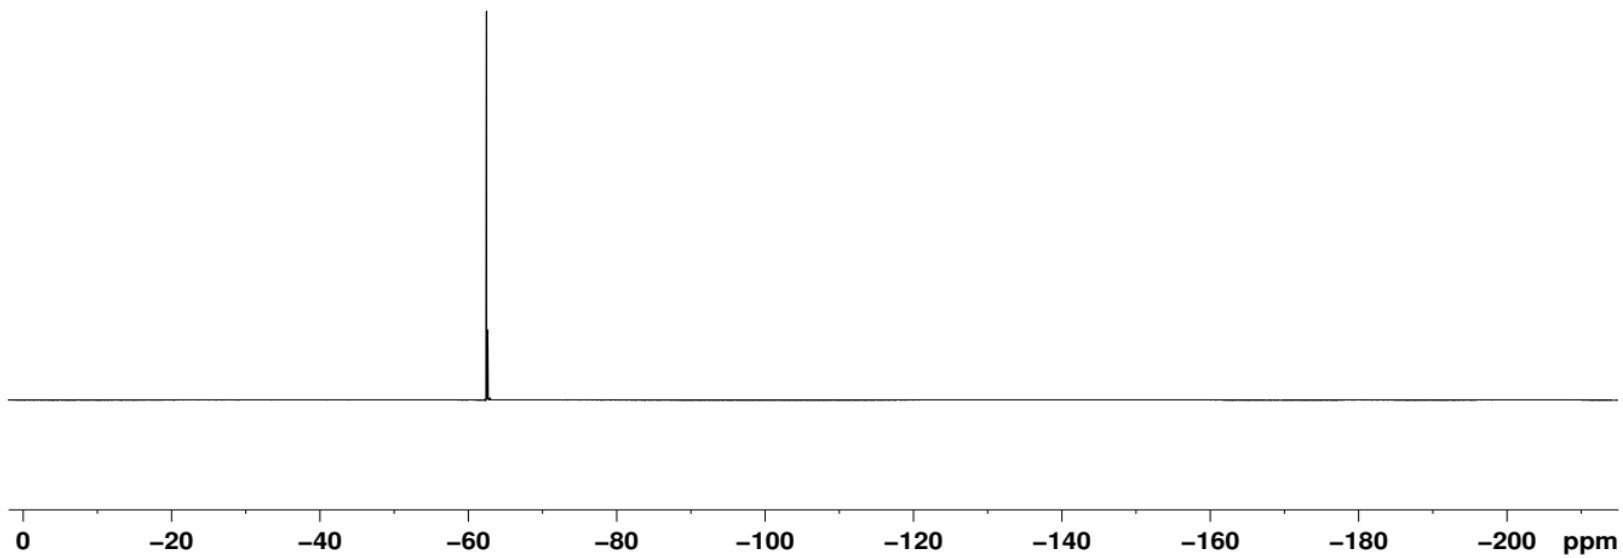

hy-S-11 <sup>1</sup>H NMR (500MHz CDCl<sub>3</sub>)

hy-yuan-diene-nai-2--

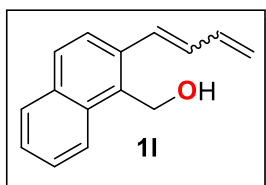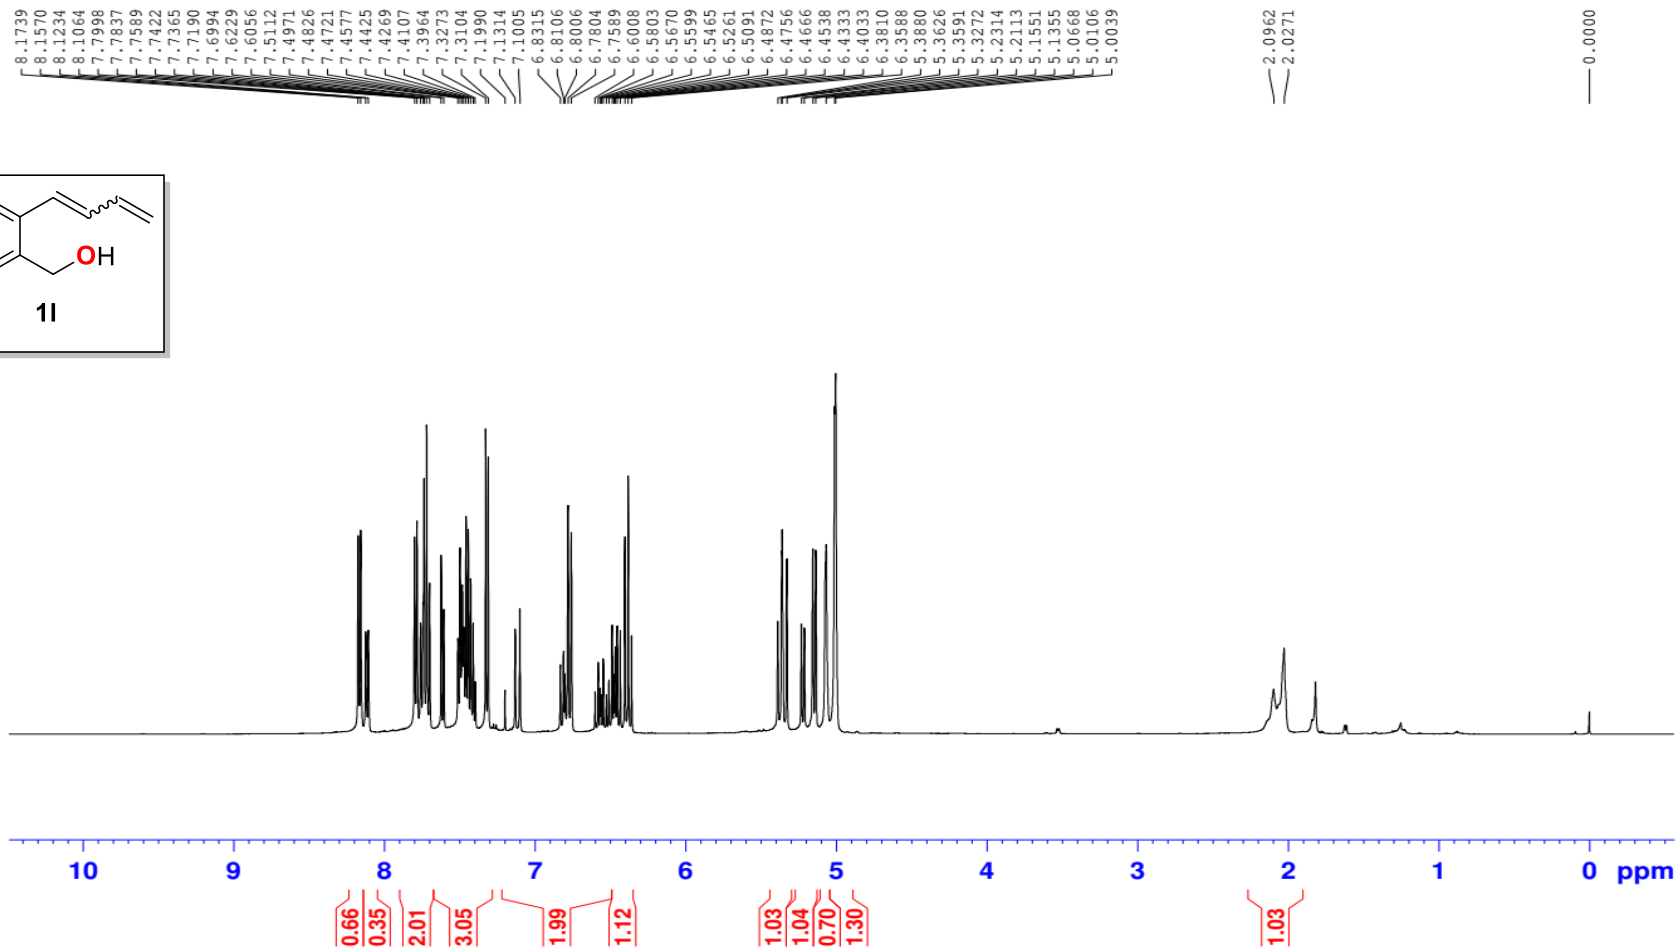

hy-S-11 <sup>13</sup>C NMR (125MHz CDCl<sub>3</sub>)

hy-yuan-diene-nai-c

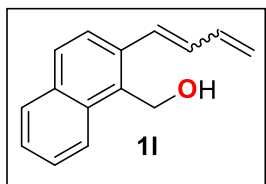

137.5  
134.5  
134.1  
133.3  
133.2  
133.2  
133.1  
132.7  
132.5  
132.4  
132.2  
130.0  
129.5  
128.9  
128.5  
128.3  
128.0  
127.0  
126.8  
125.8  
124.3  
124.2  
123.9  
120.0  
118.6

77.4  
77.2  
76.9

59.1  
57.6

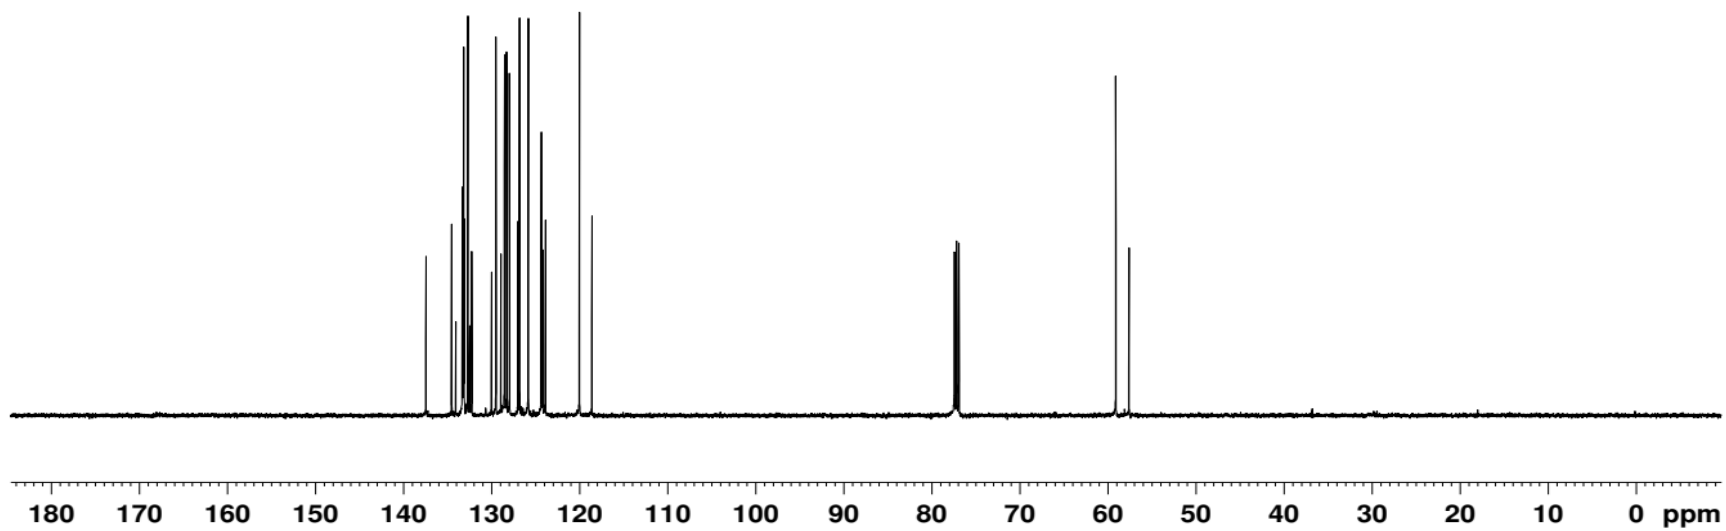

hy-S-1m <sup>1</sup>H NMR (500MHz CDCl<sub>3</sub>)

hy-yuan-diene-cha-ph---

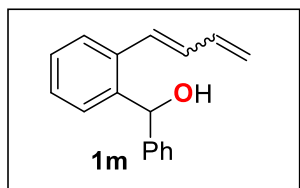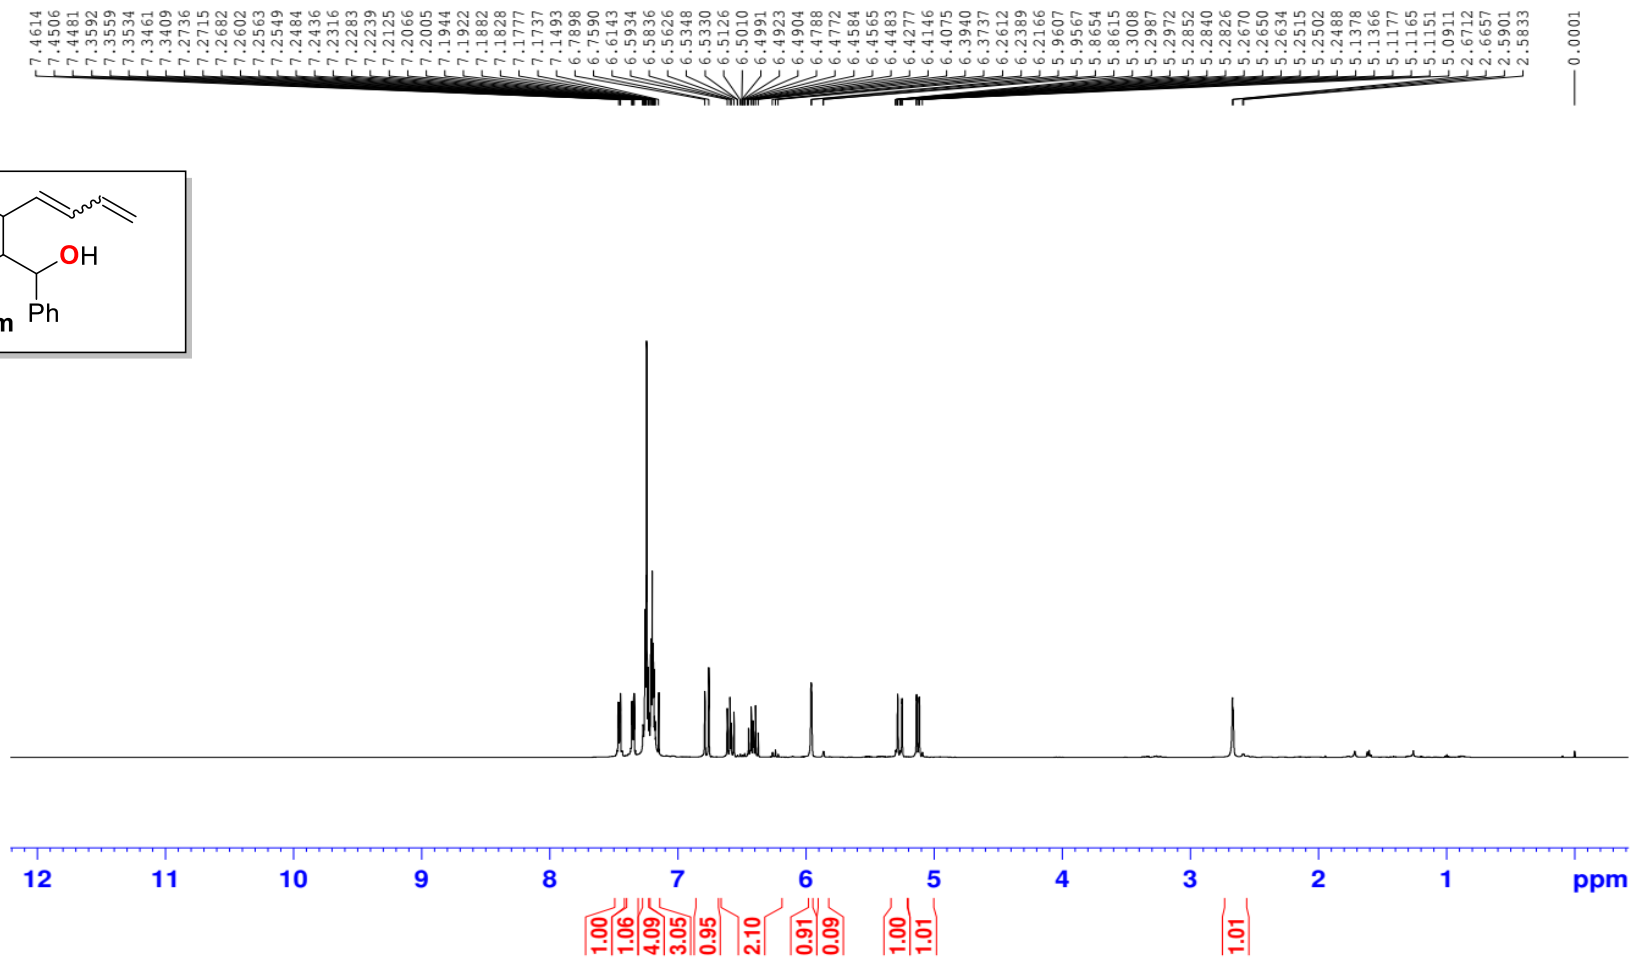



hy-S-1m <sup>13</sup>C NMR (125MHz CDCl<sub>3</sub>)

hy-yuan-diene-cha-ph-c-

143.0  
140.6  
137.3  
135.4  
132.0  
129.8  
128.5  
127.8  
127.8  
127.5  
127.1  
126.9  
126.1  
118.1

77.4  
77.2  
76.9  
72.8

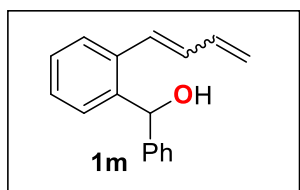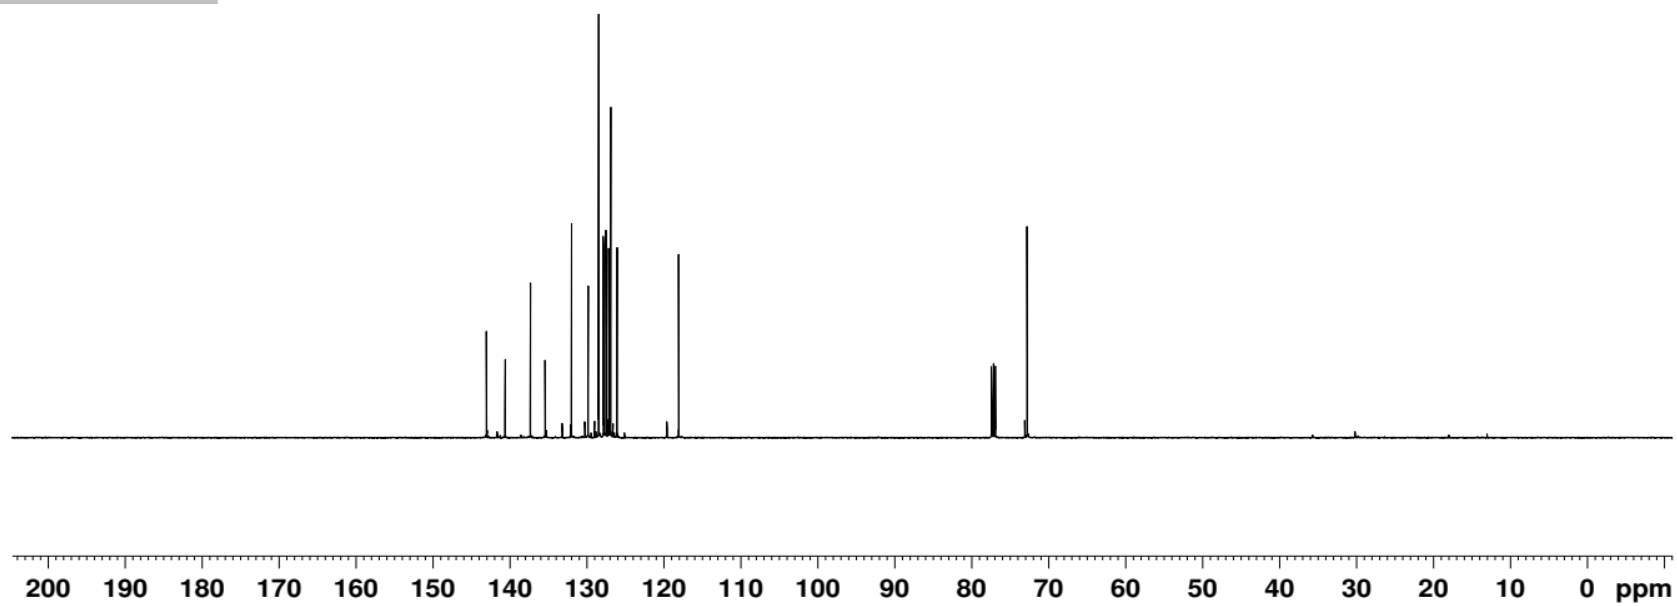

hy-S-1n <sup>1</sup>H NMR (400MHz CDCl<sub>3</sub>)

hy-yuan-diene-cha-p-ome---

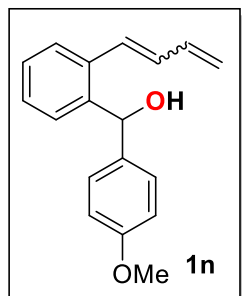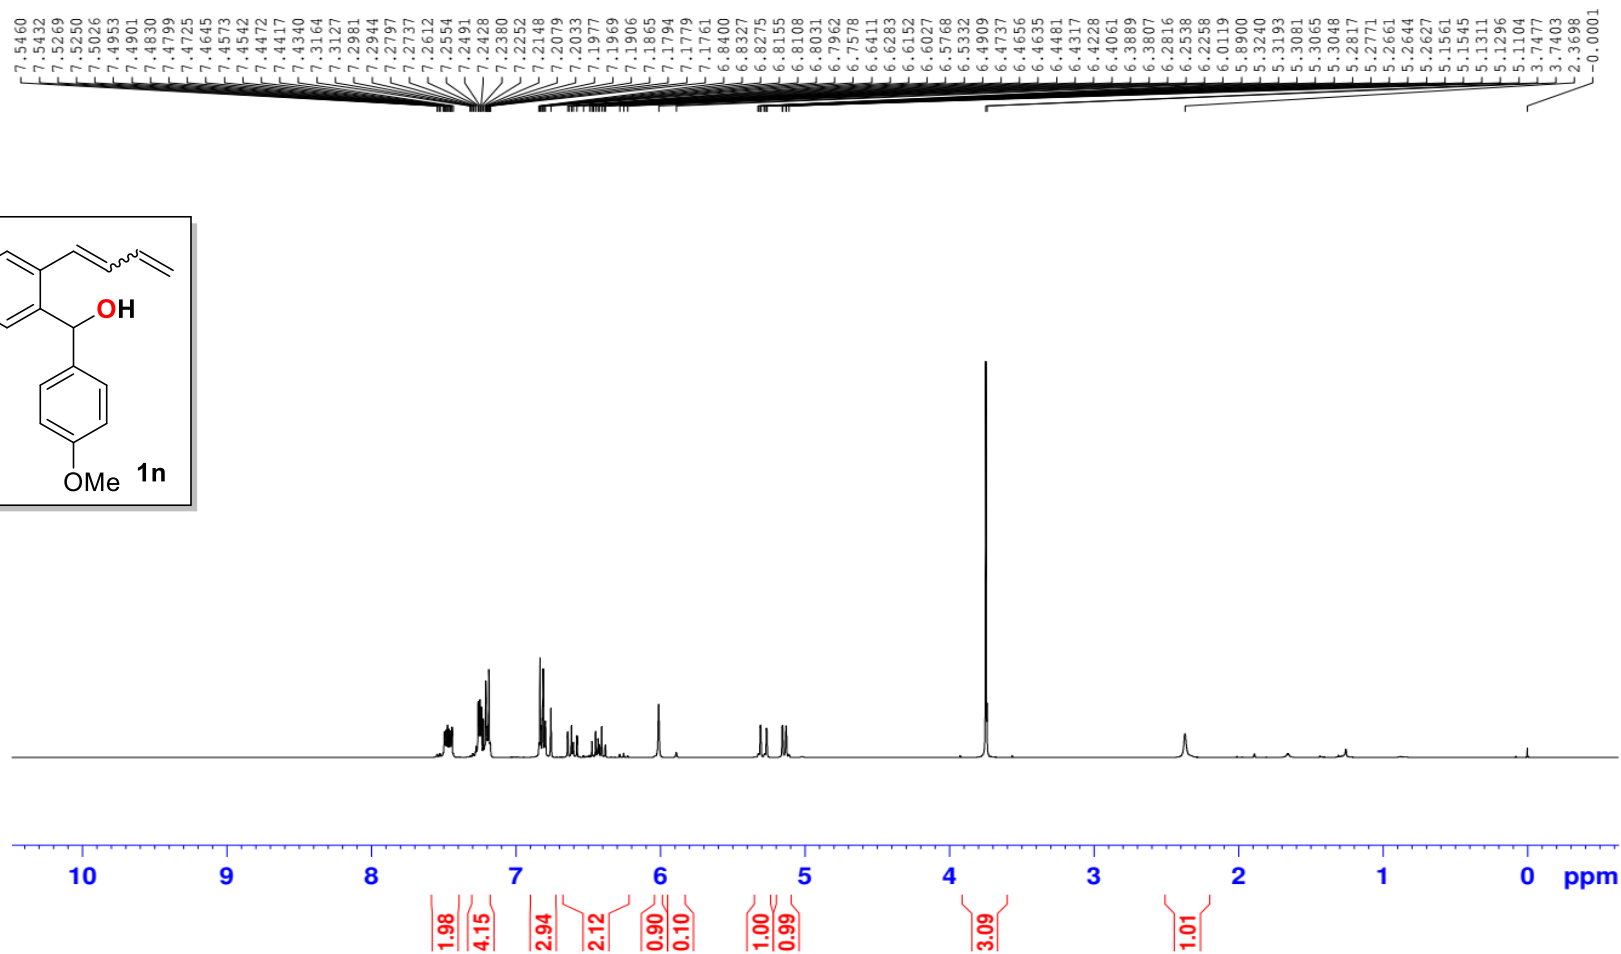

hy-S-1n <sup>13</sup>C NMR (100MHz CDCl<sub>3</sub>)

hy-yuan-diene-cha-p-ome-c-

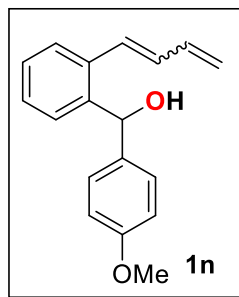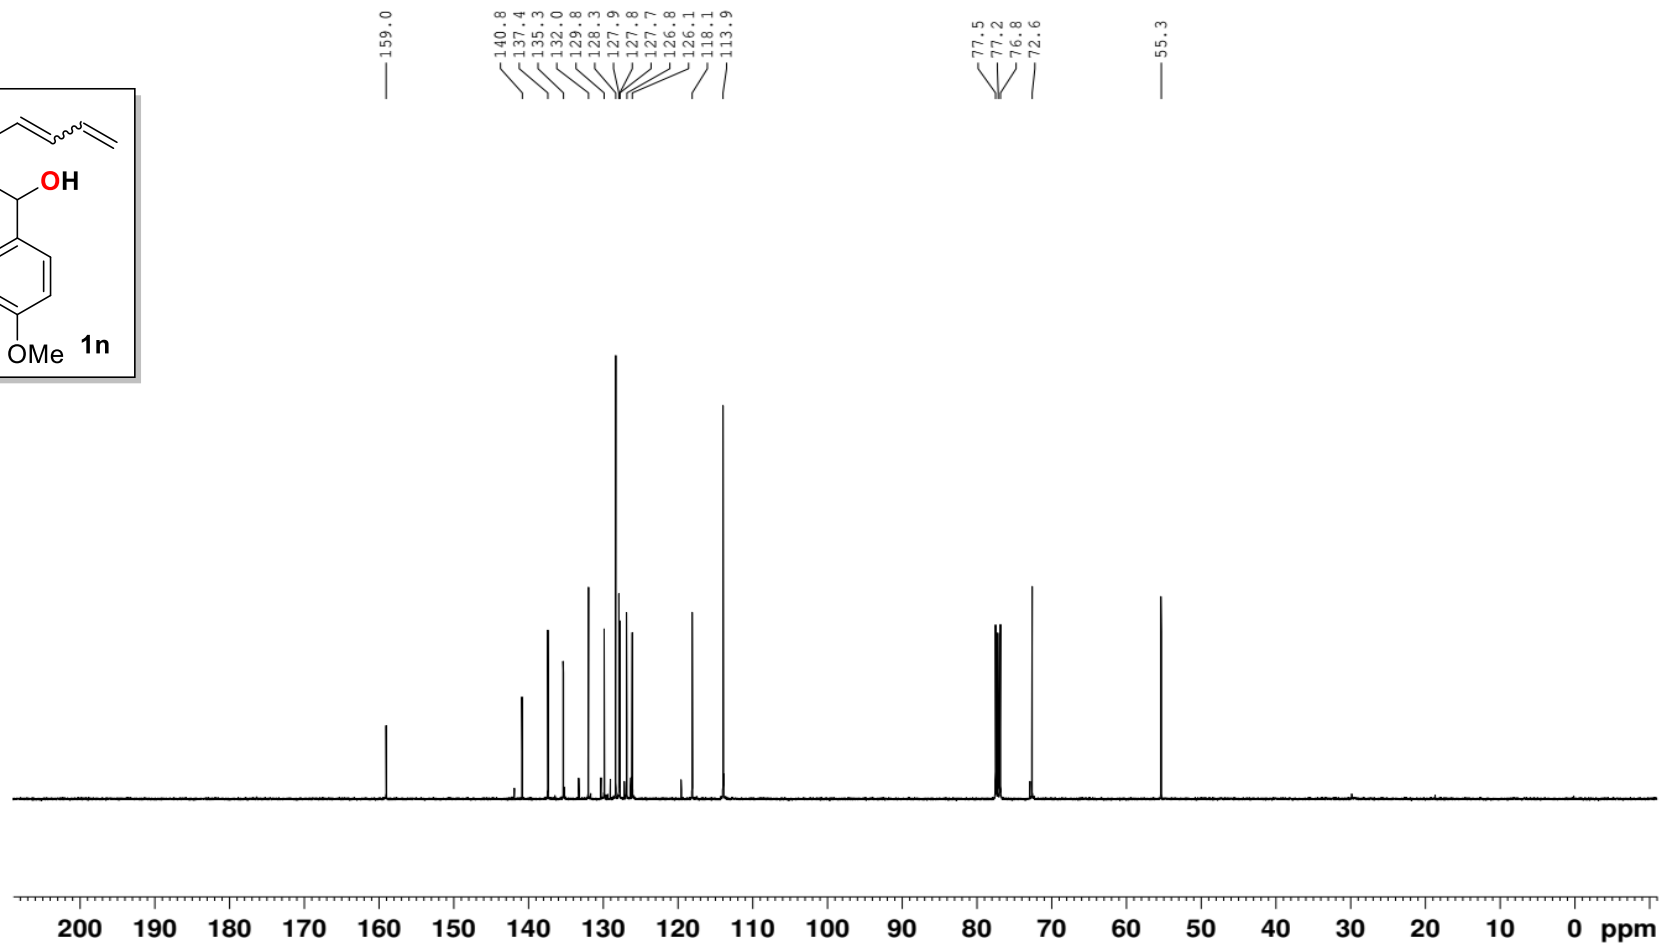

hy-S-1o <sup>1</sup>H NMR (400MHz CDCl<sub>3</sub>)

hy-yuna-diene-dich3---

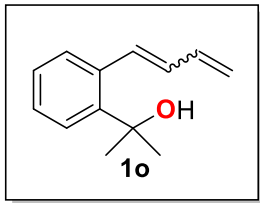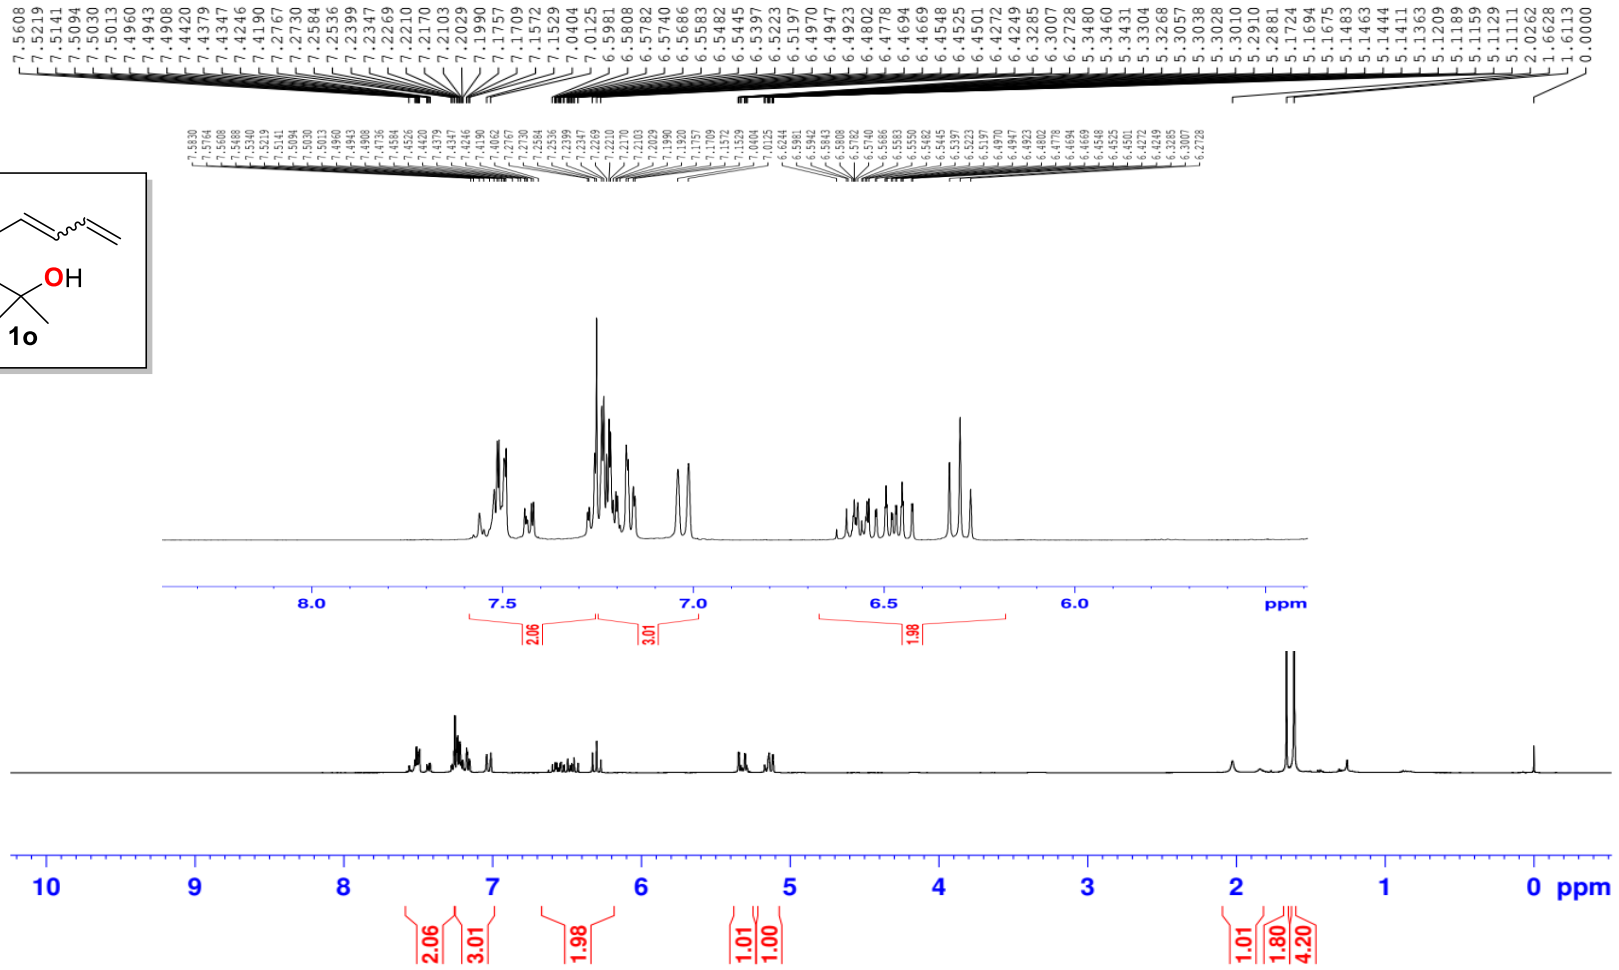

hy-S-1o <sup>13</sup>C NMR (100MHz CDCl<sub>3</sub>)

hy-yuan-diene-dich3-c-

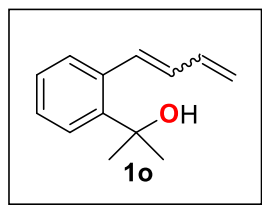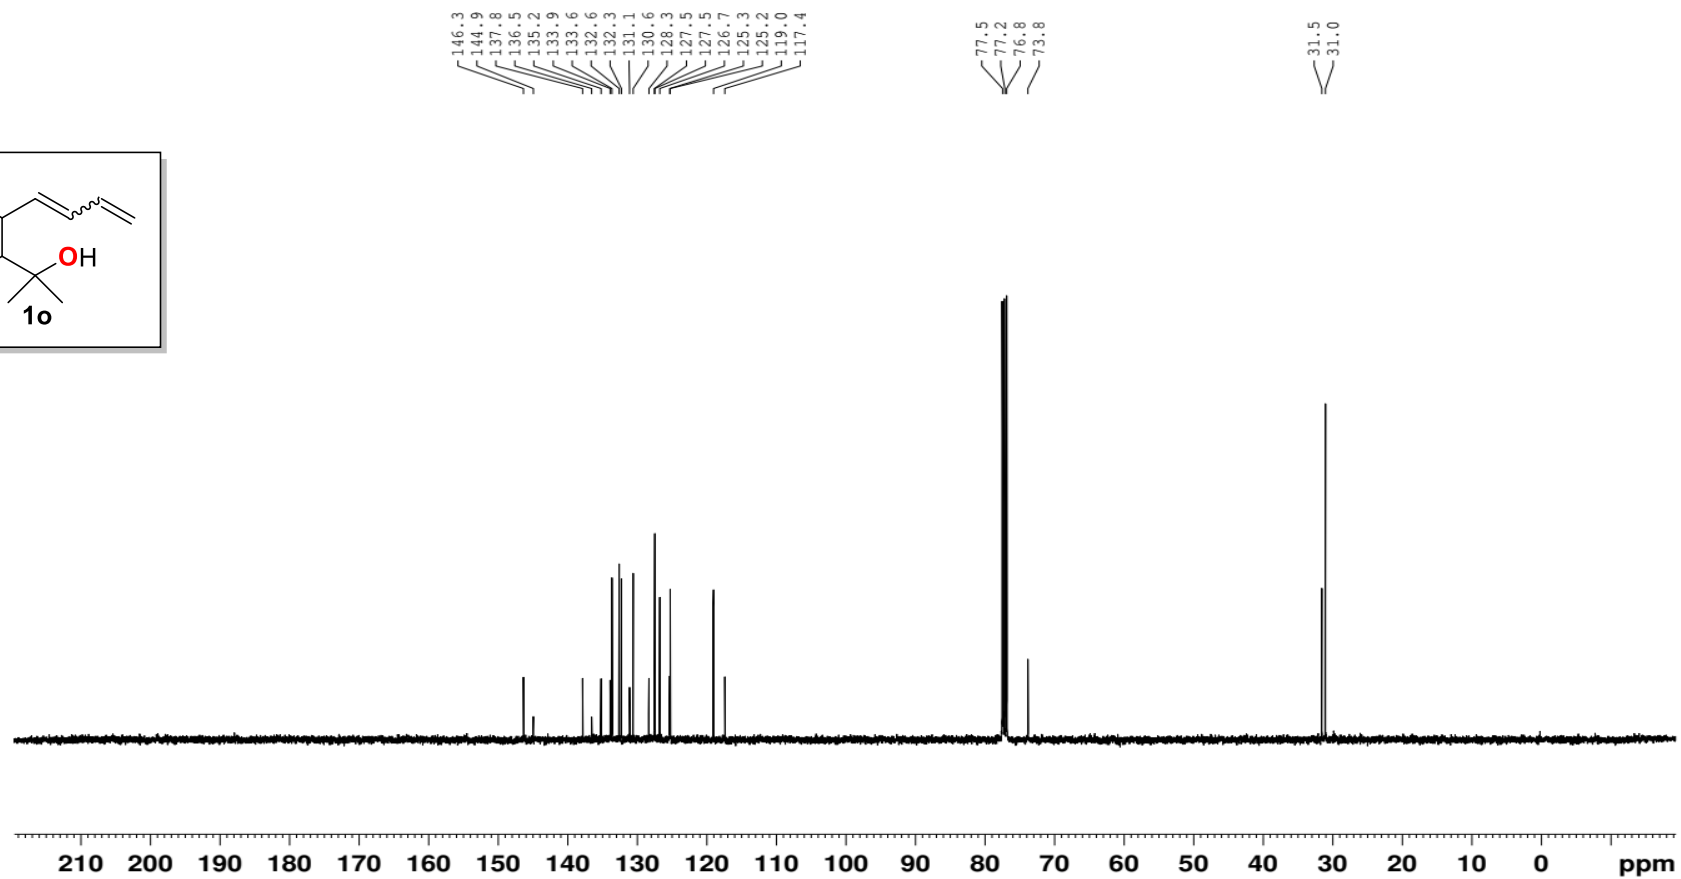

hy-S-1p <sup>1</sup>H NMR (400MHz CDCl<sub>3</sub>)

hy-yuan-diene-cha-ch3---

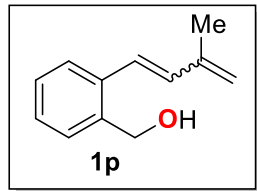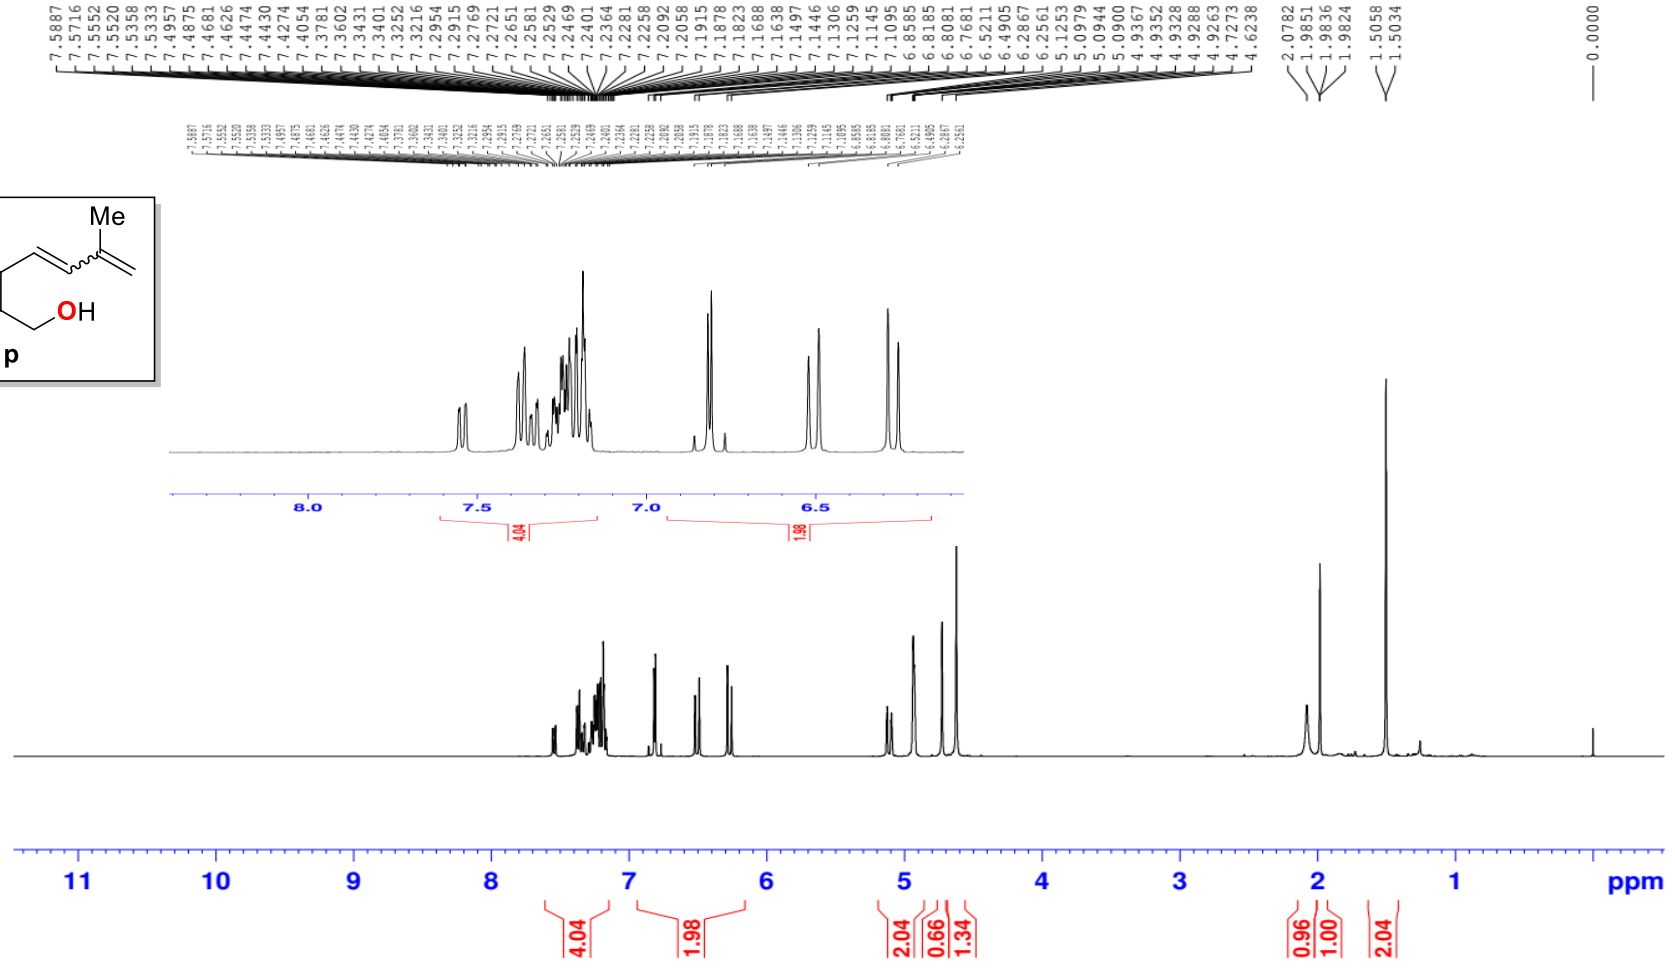

hy-S-1p <sup>13</sup>C NMR (100MHz CDCl<sub>3</sub>)

hy-yuan-diene-cha-ch3-c-

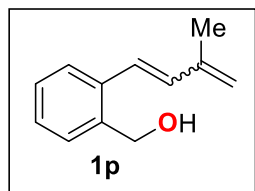

142.3  
141.9  
138.4  
137.8  
137.0  
136.3  
134.2  
129.6  
128.5  
128.2  
127.6  
127.5  
127.4  
127.2  
127.2  
125.9  
125.3  
118.7  
117.9

77.5  
77.2  
76.8

63.5  
63.5

22.0  
18.7

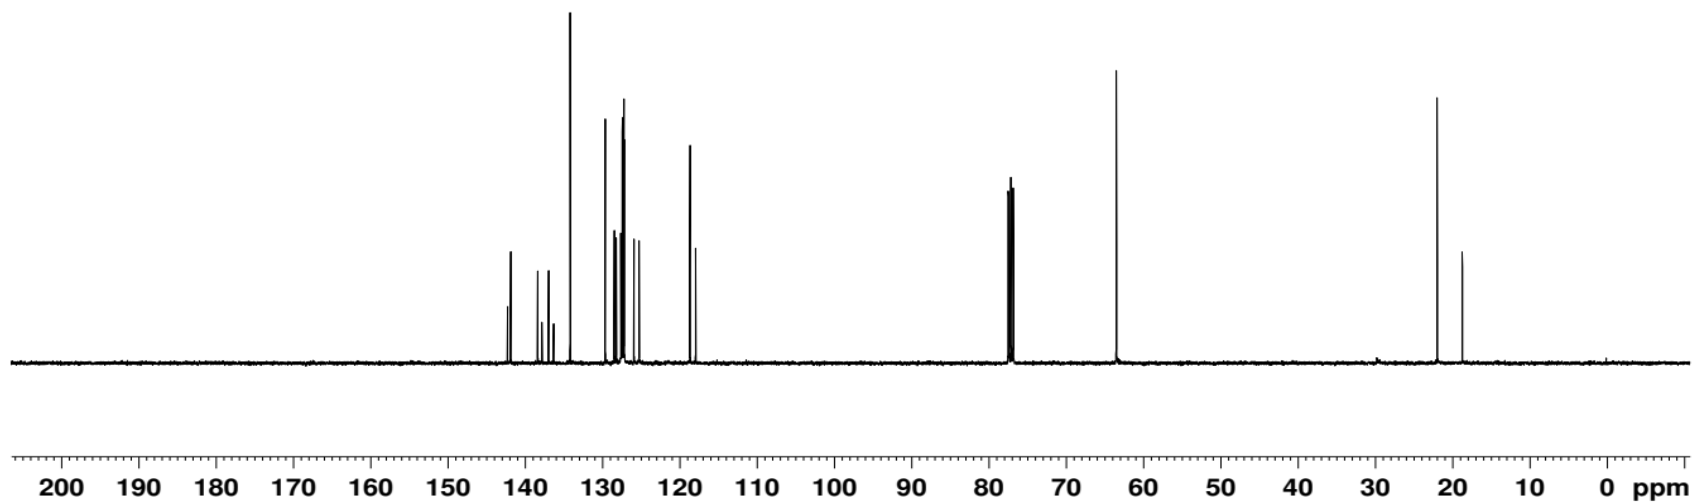

hy-S-1q <sup>1</sup>H NMR (400MHz CDCl<sub>3</sub>)

hy-yuan-diene-d-ch3-2--

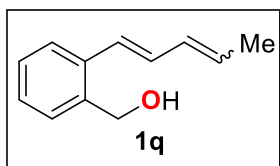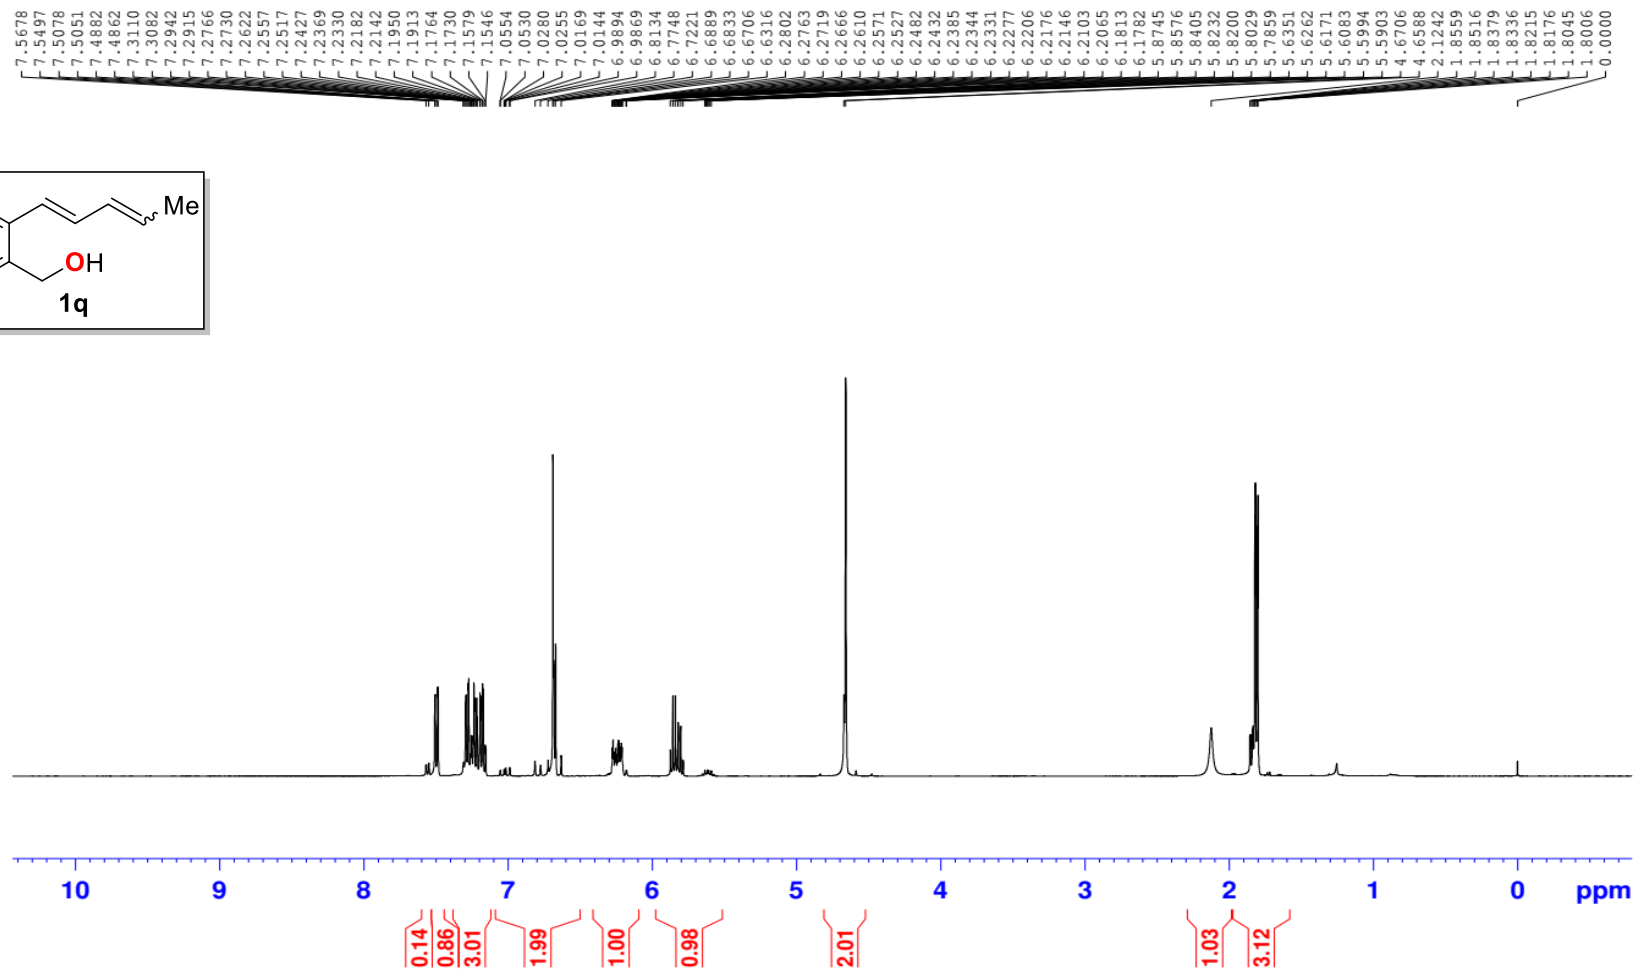



hy-S-1q <sup>13</sup>C NMR (125MHz CDCl<sub>3</sub>)

hy-yuan-diene-d-ch3-c--

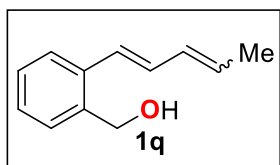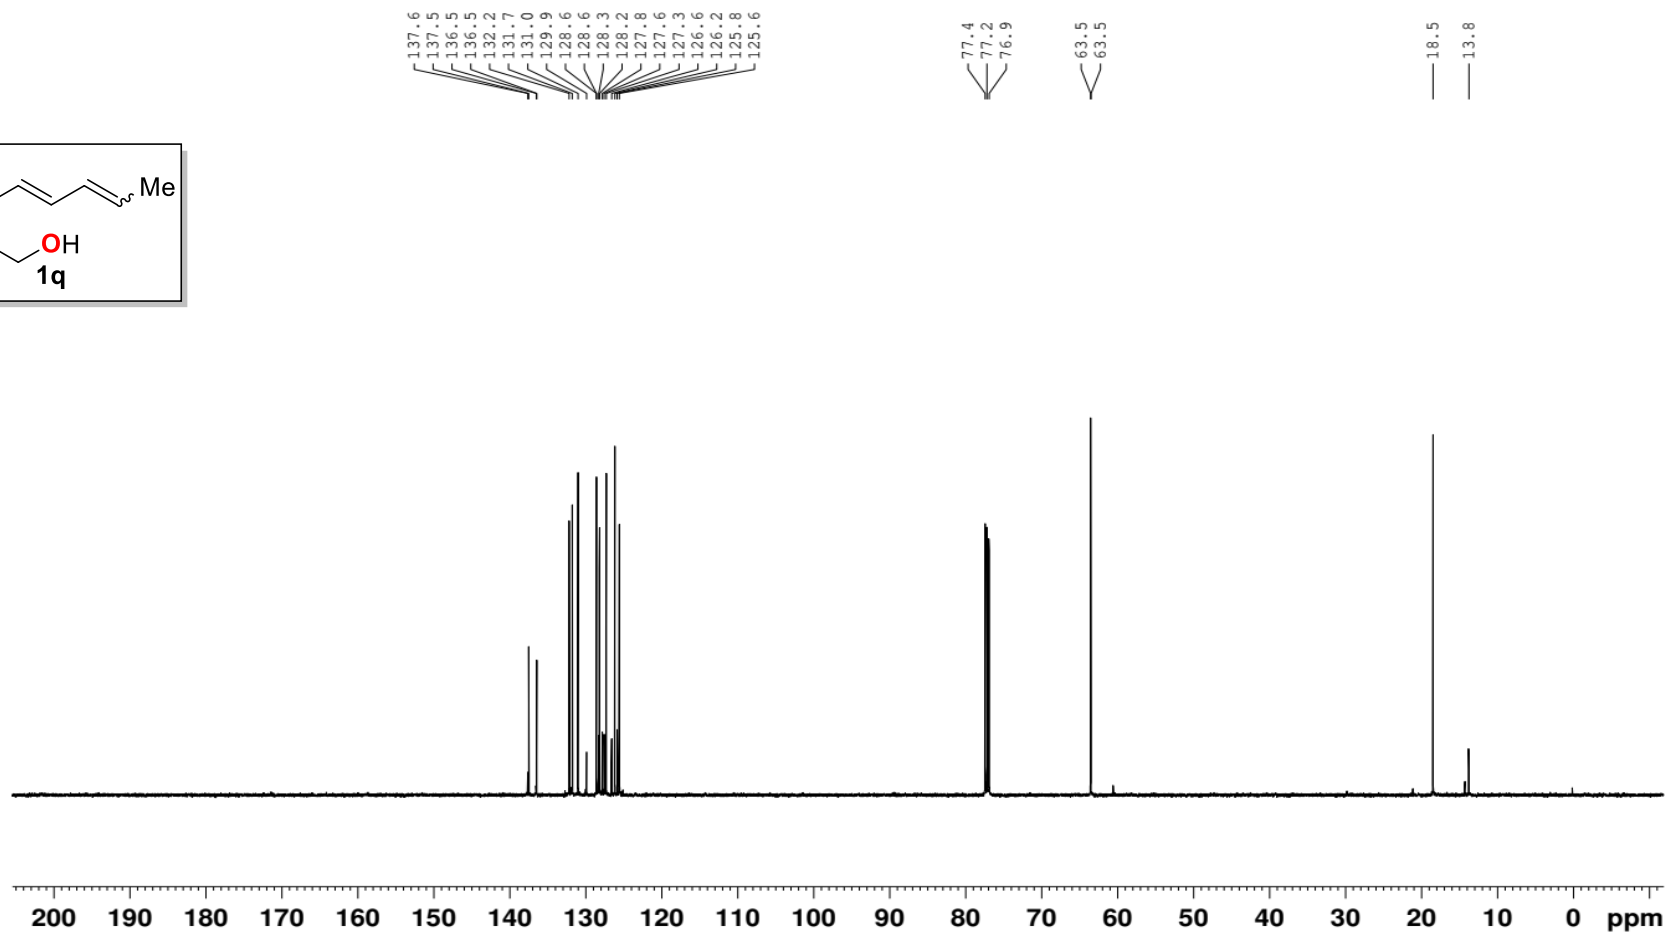

hy-S-1r <sup>1</sup>H NMR (400MHz CDCl<sub>3</sub>)

ybk-x210901-co2et

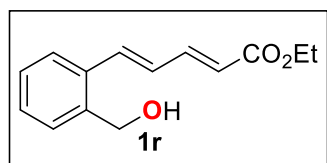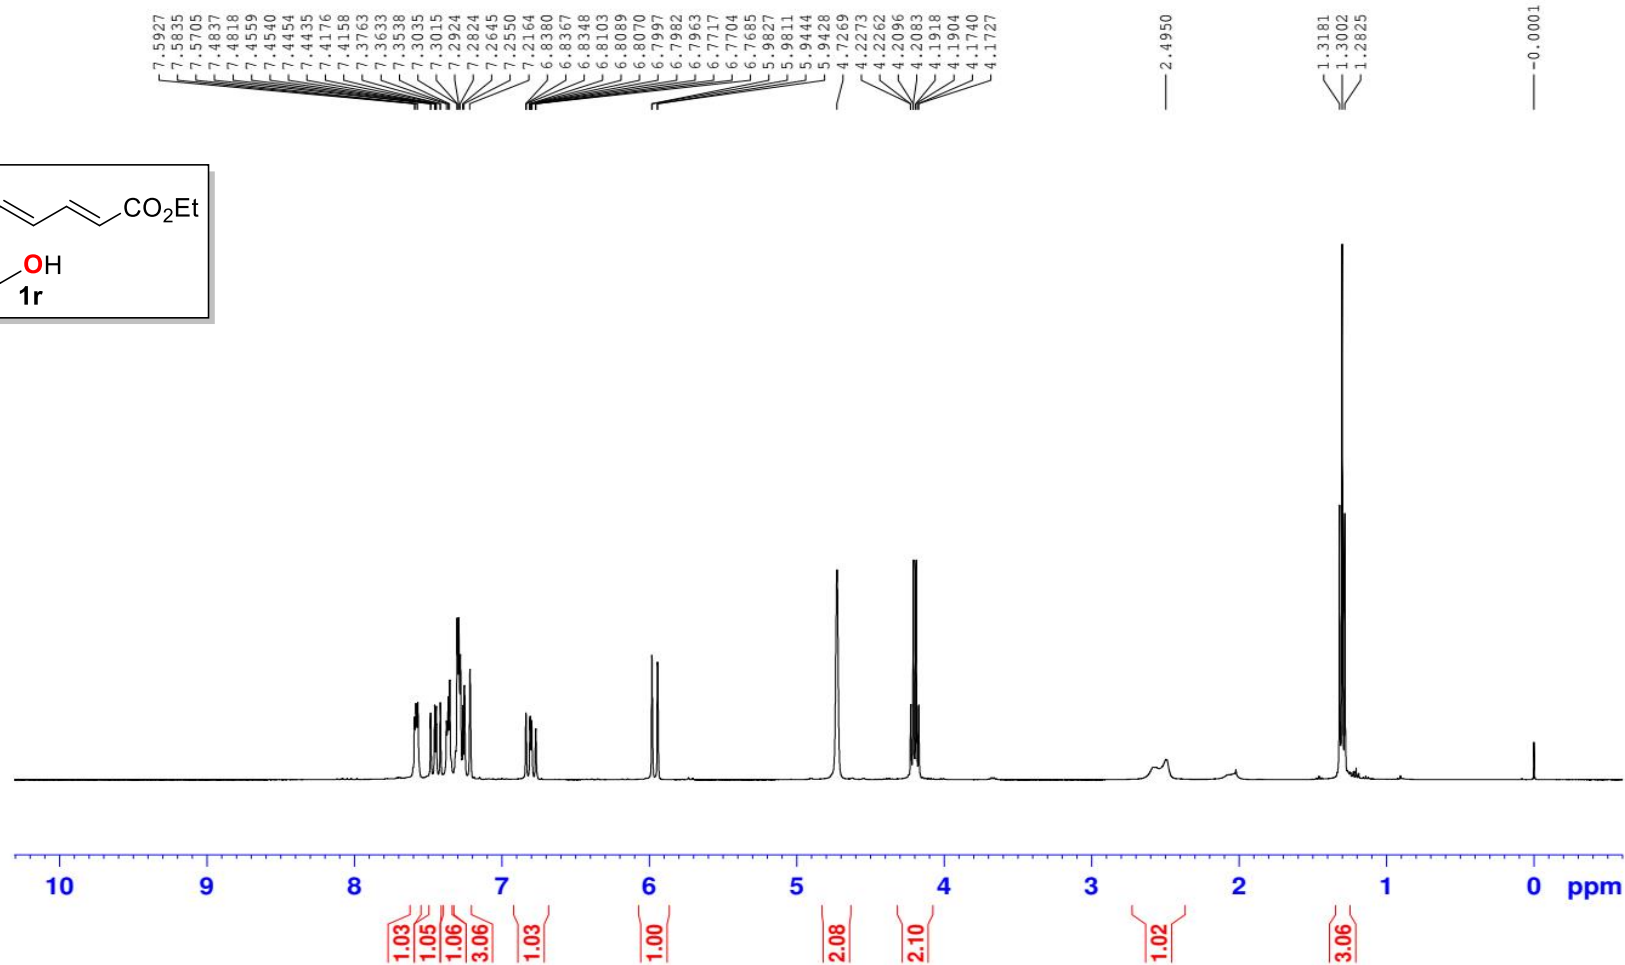

hy-S-1r <sup>13</sup>C NMR (125MHz CDCl<sub>3</sub>)

ybk-x210903-1-oh-c

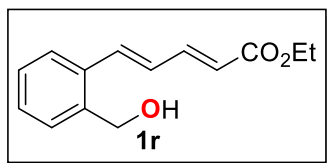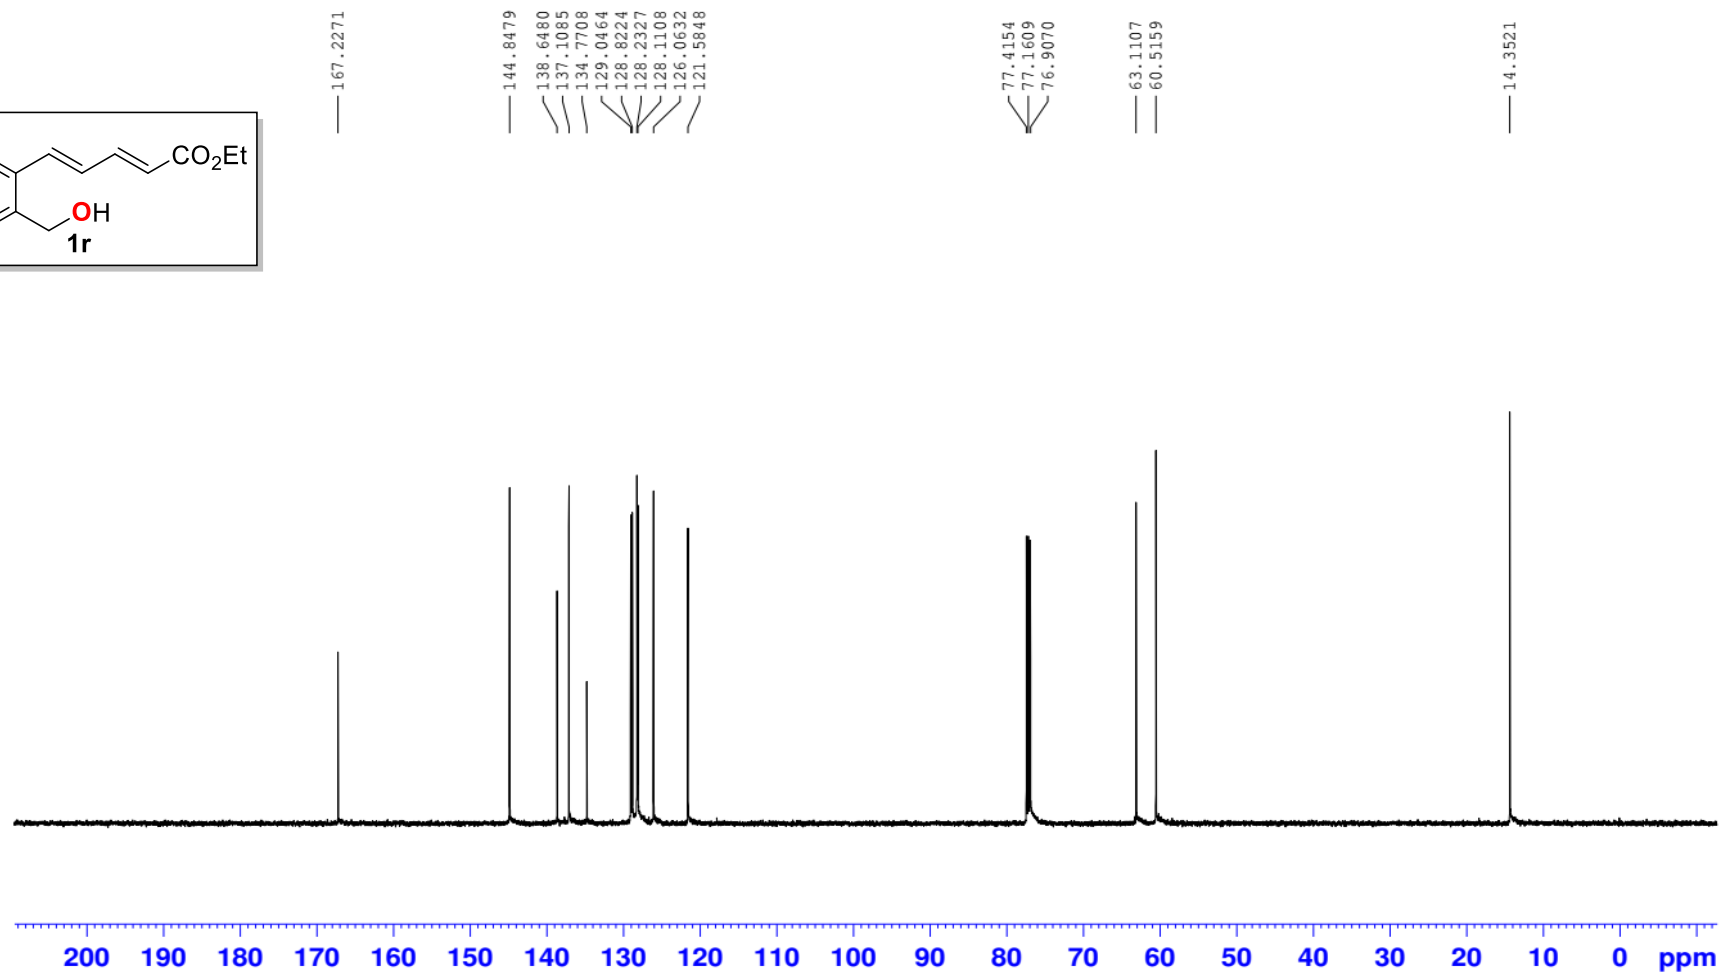

hy-P-3aa <sup>1</sup>H NMR (400MHz CDCl<sub>3</sub>)

hy-biaoliu-h-

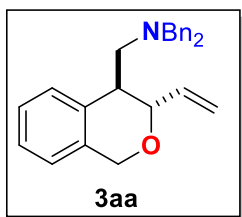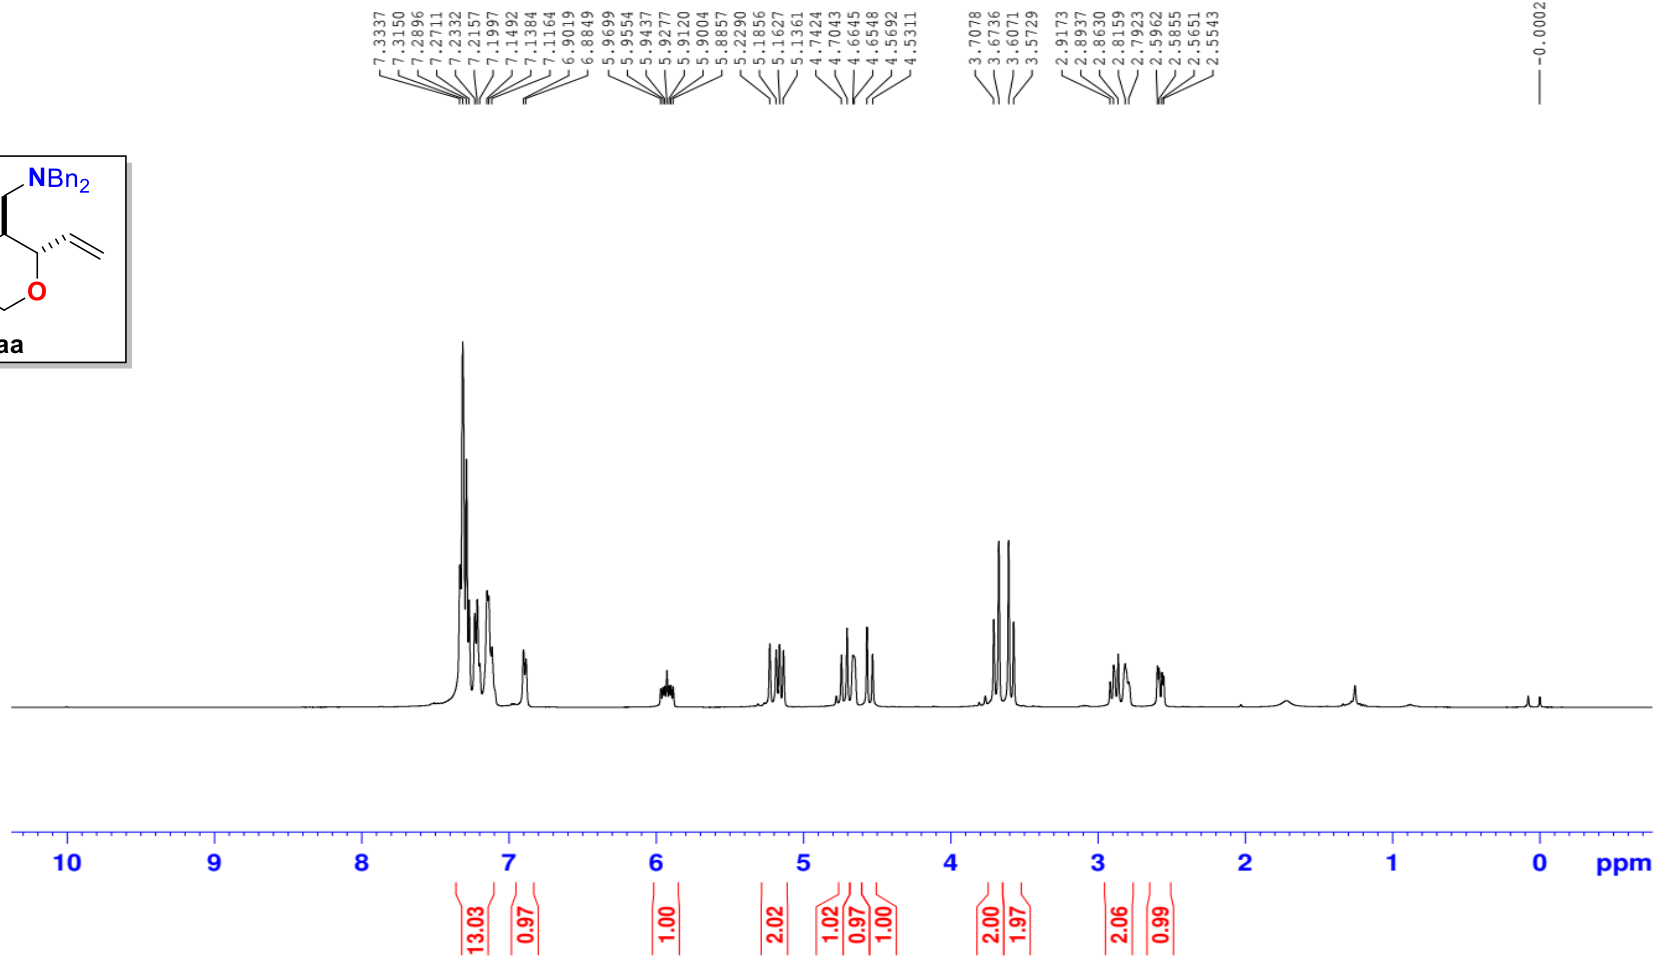

hy-P-3aa <sup>13</sup>C NMR (100MHz CDCl<sub>3</sub>)

hy-biaoliu-c-

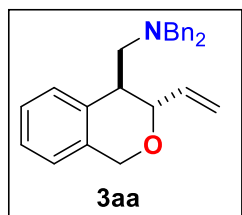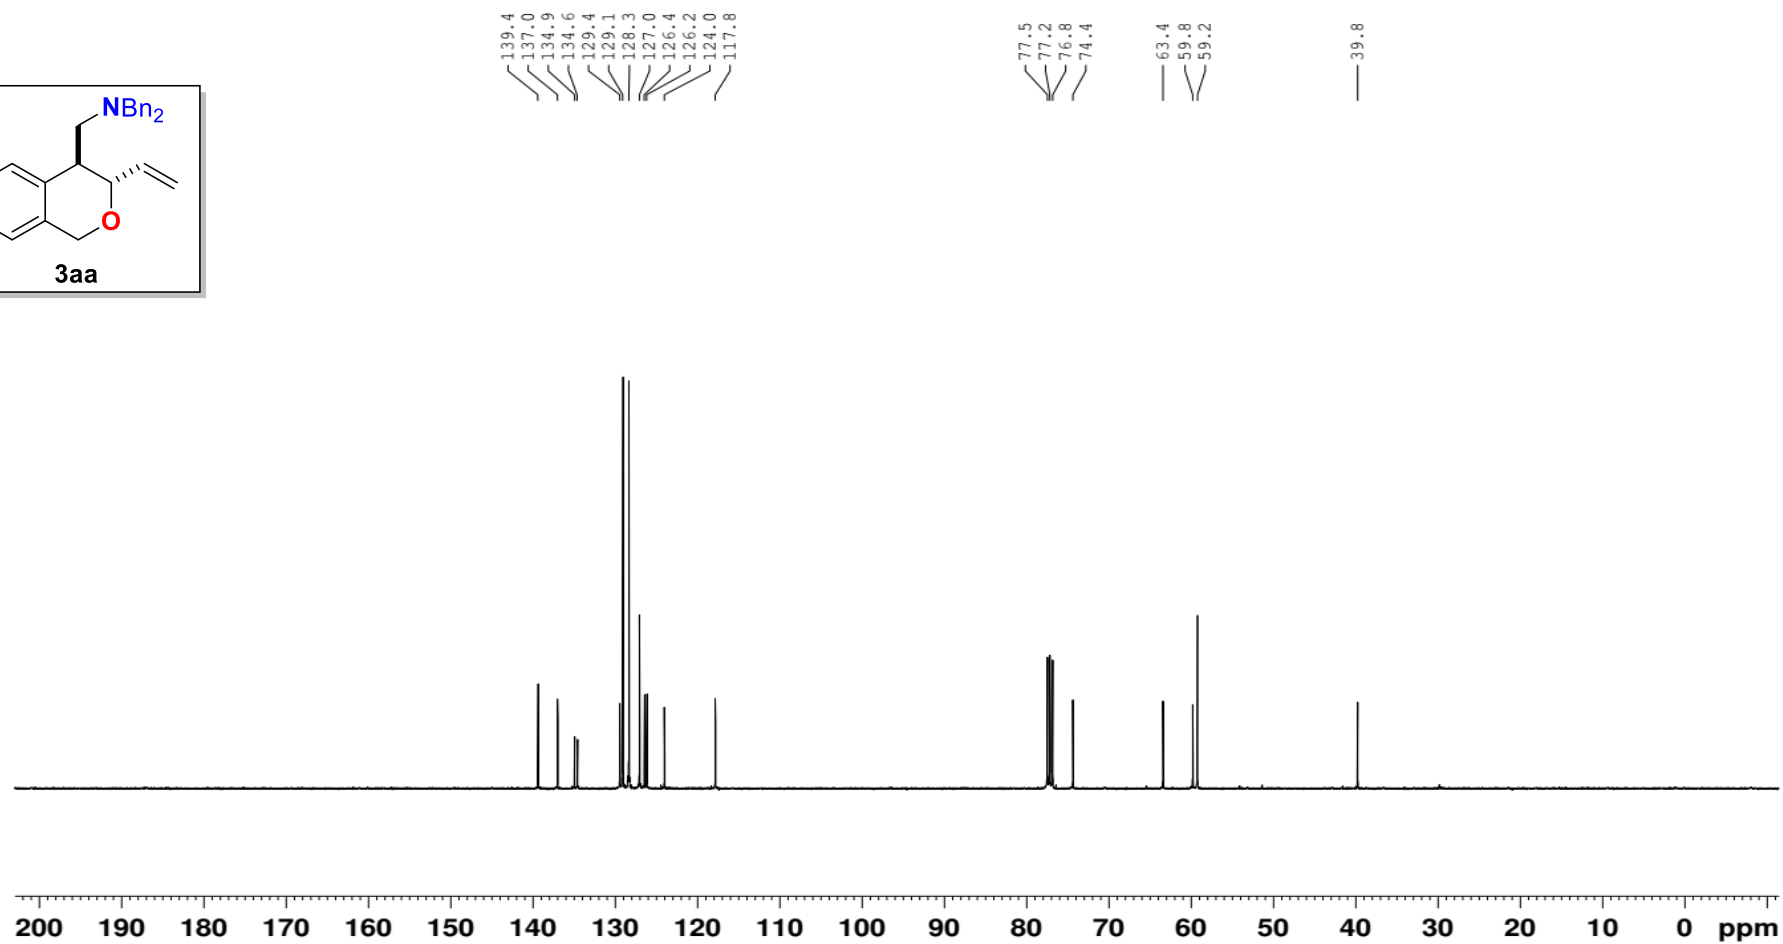

hy-aminal-p-ch3-h-

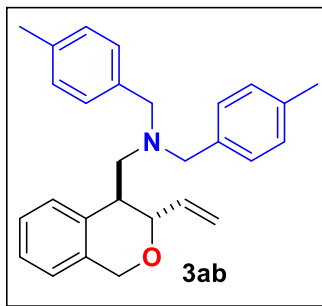

hy-P-3ab <sup>1</sup>H NMR (400MHz CDCl<sub>3</sub>)

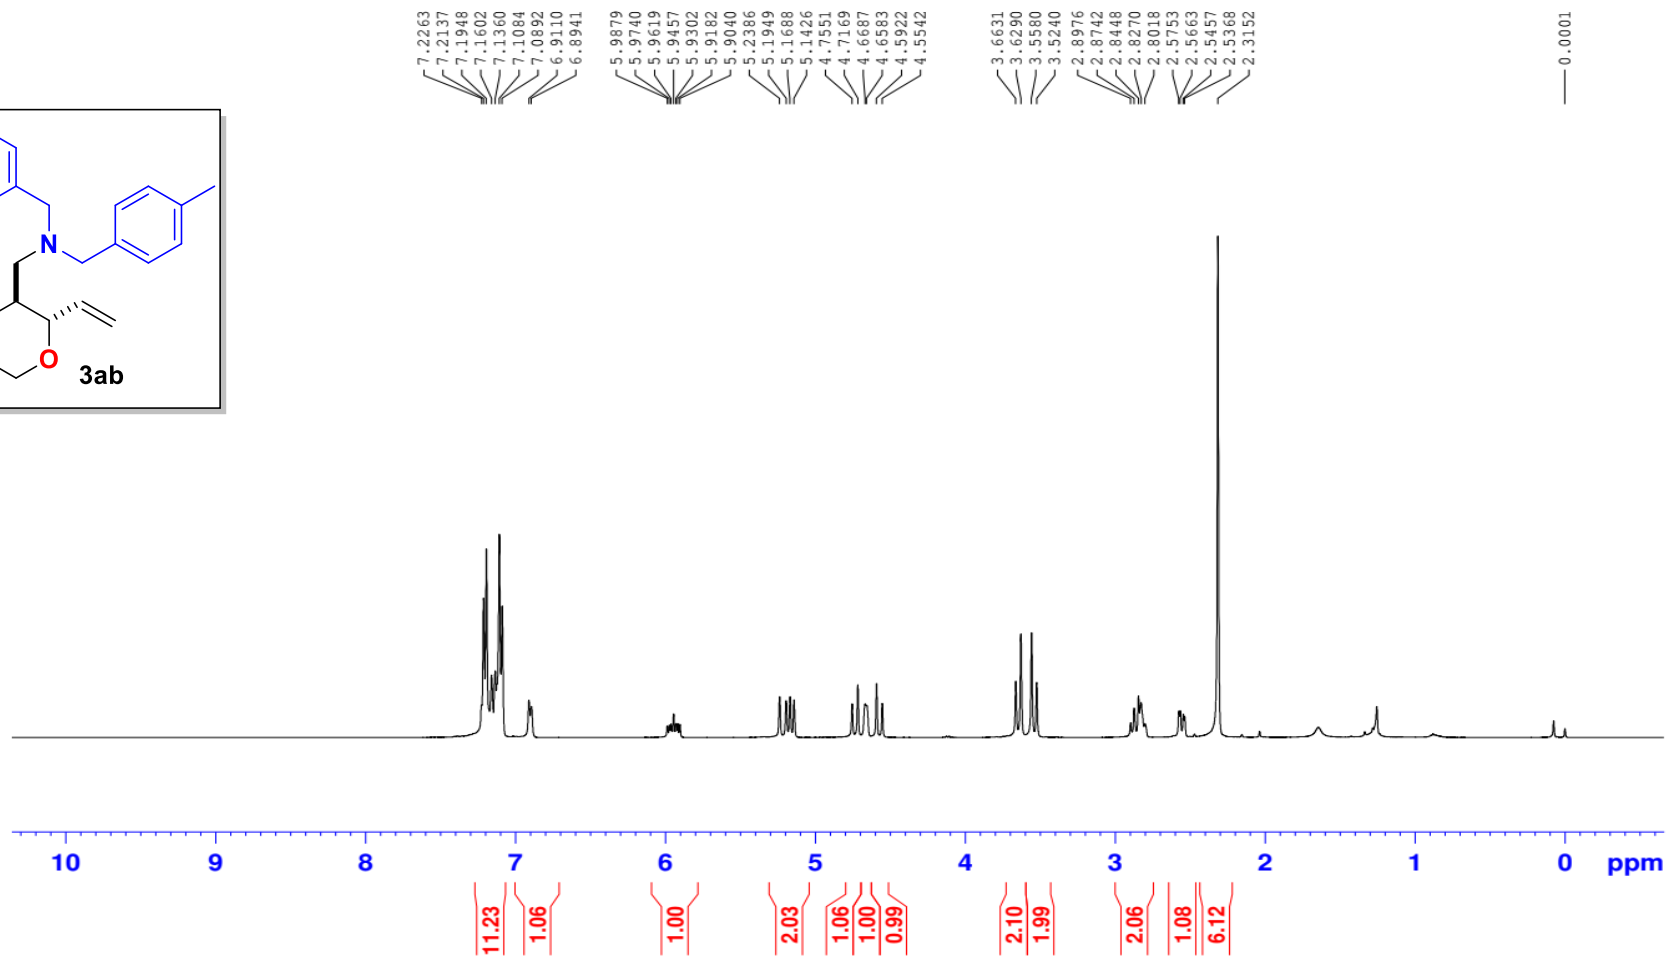

hy-P-3ab <sup>13</sup>C NMR (100MHz CDCl<sub>3</sub>)

hy-aminal-ch3-c-

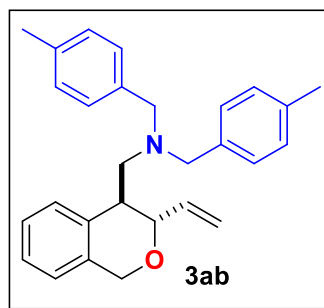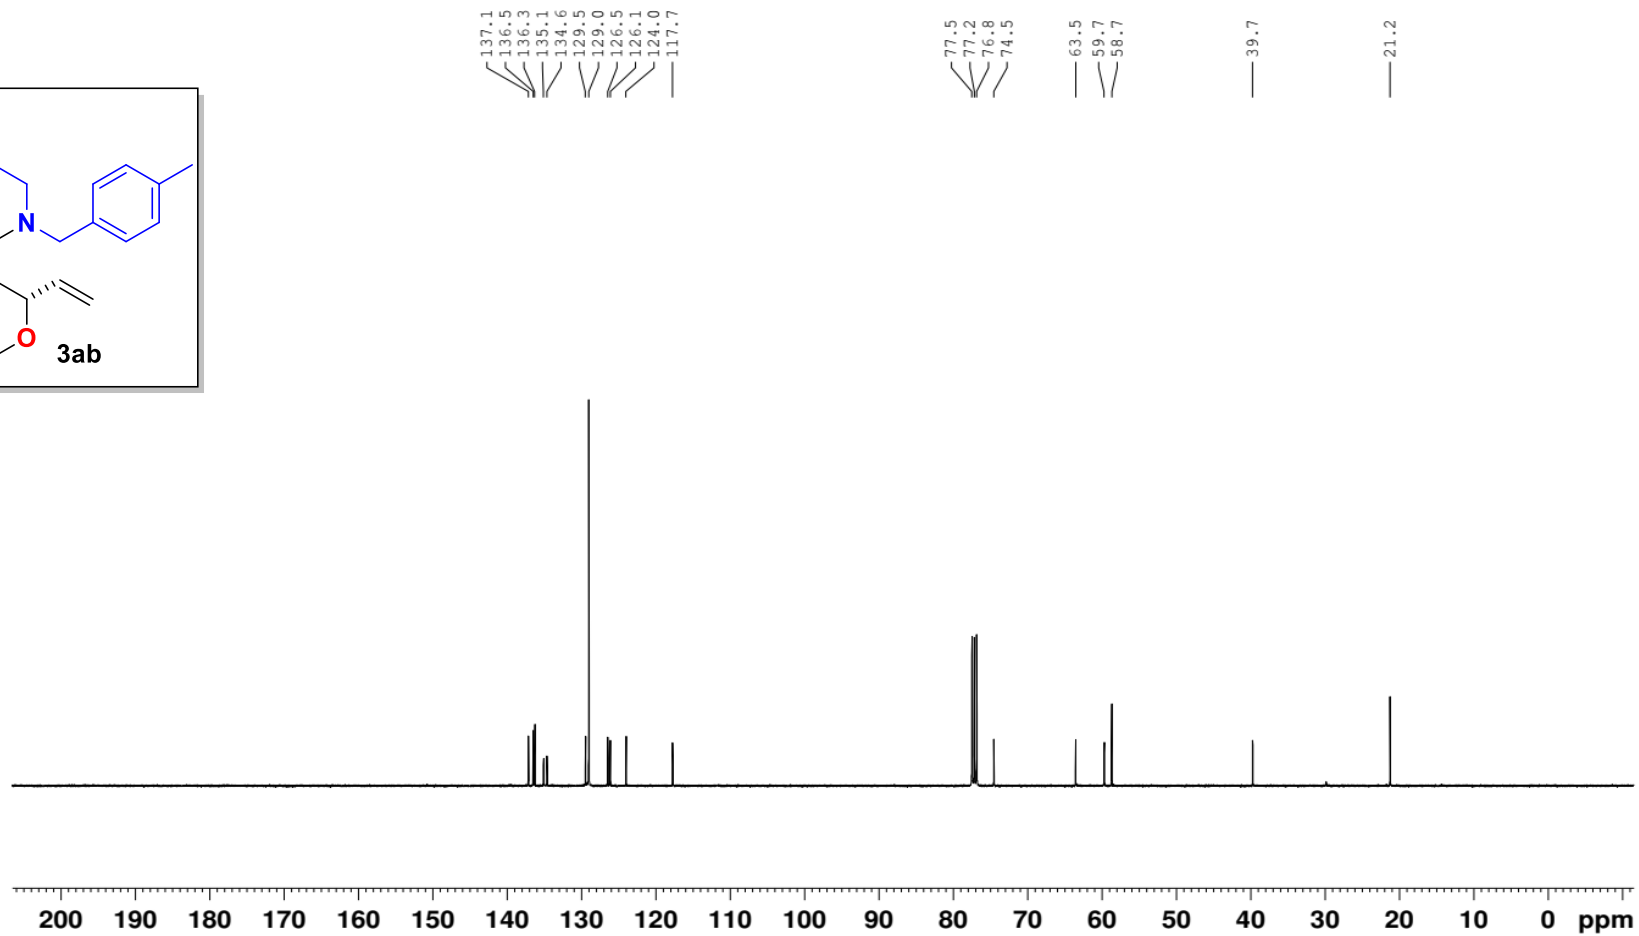

hy-P-3ac <sup>1</sup>H NMR (400MHz CDCl<sub>3</sub>)

hy-aminal-p-tbu-h-

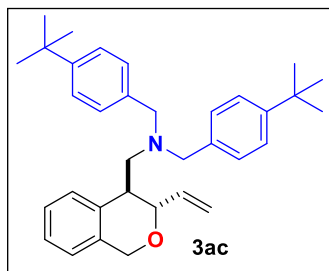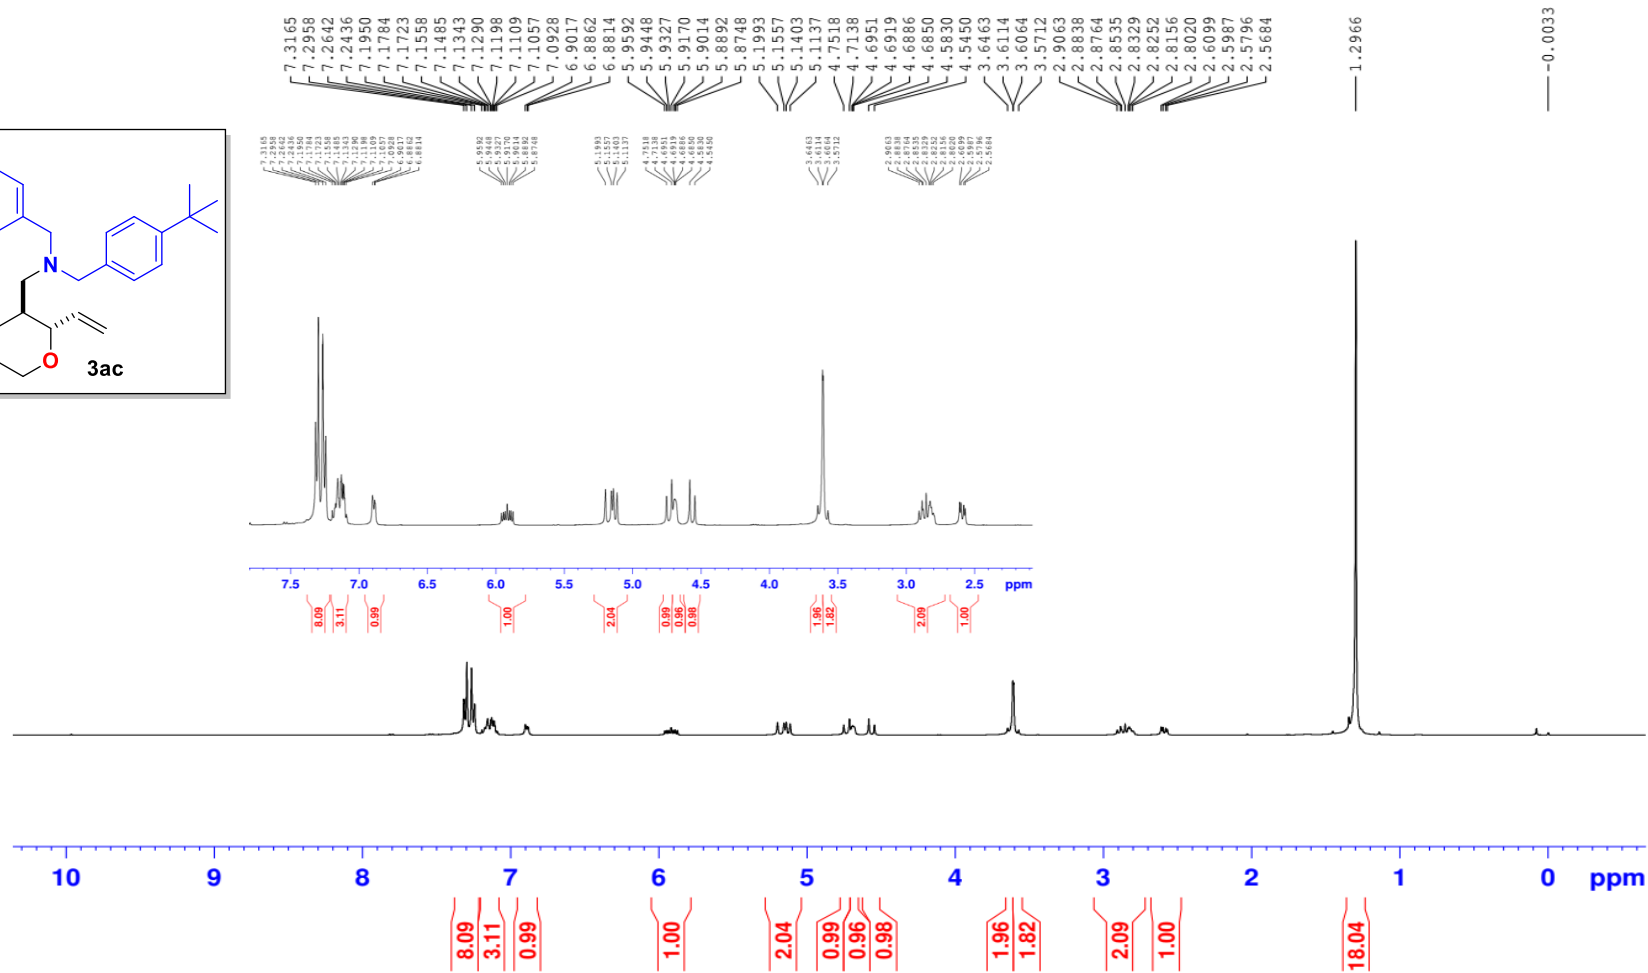



hy-P-3ac <sup>13</sup>C NMR (100MHz CDCl<sub>3</sub>)

hy-aminal-p-tbu-c-

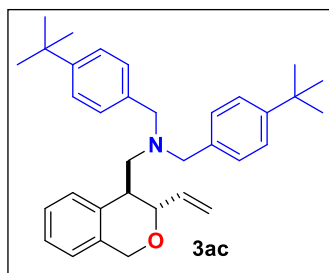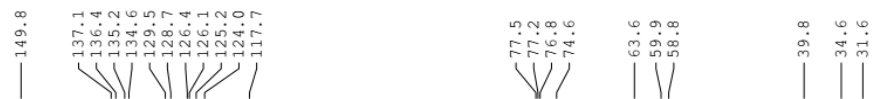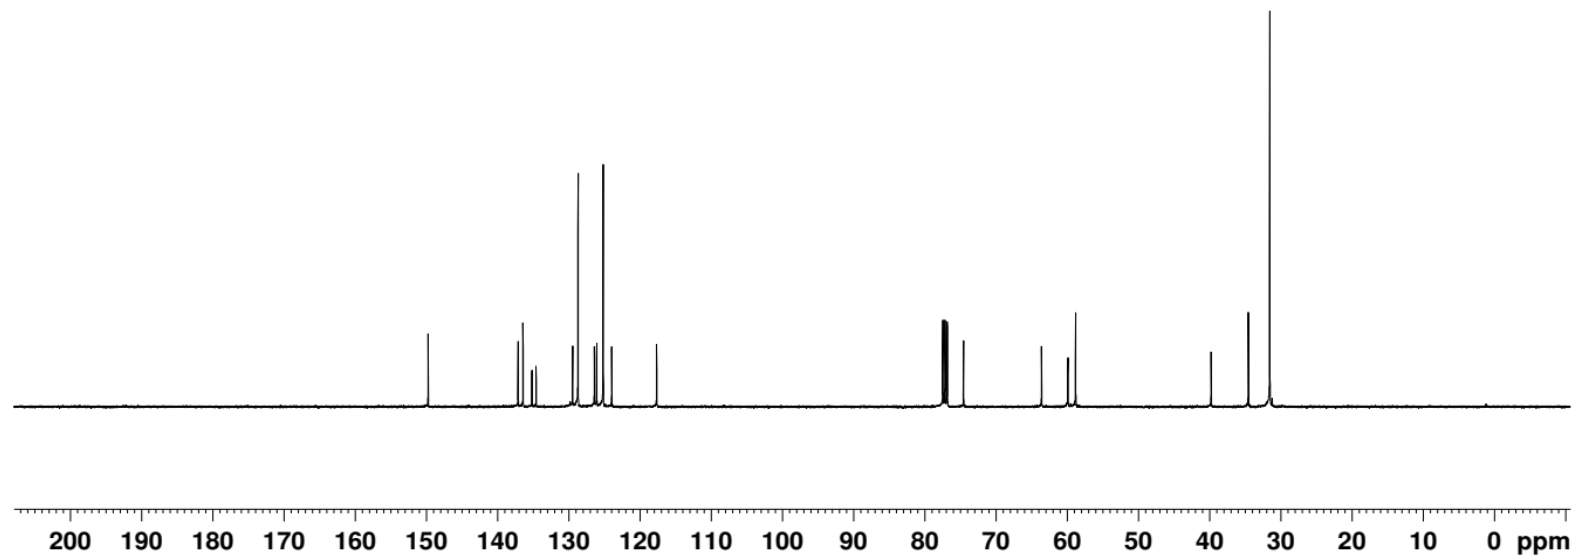

hy-P-3ad <sup>1</sup>H NMR (400MHz CDCl<sub>3</sub>)

hy-aminal-4-ome-h-

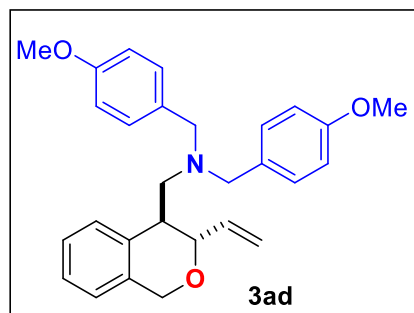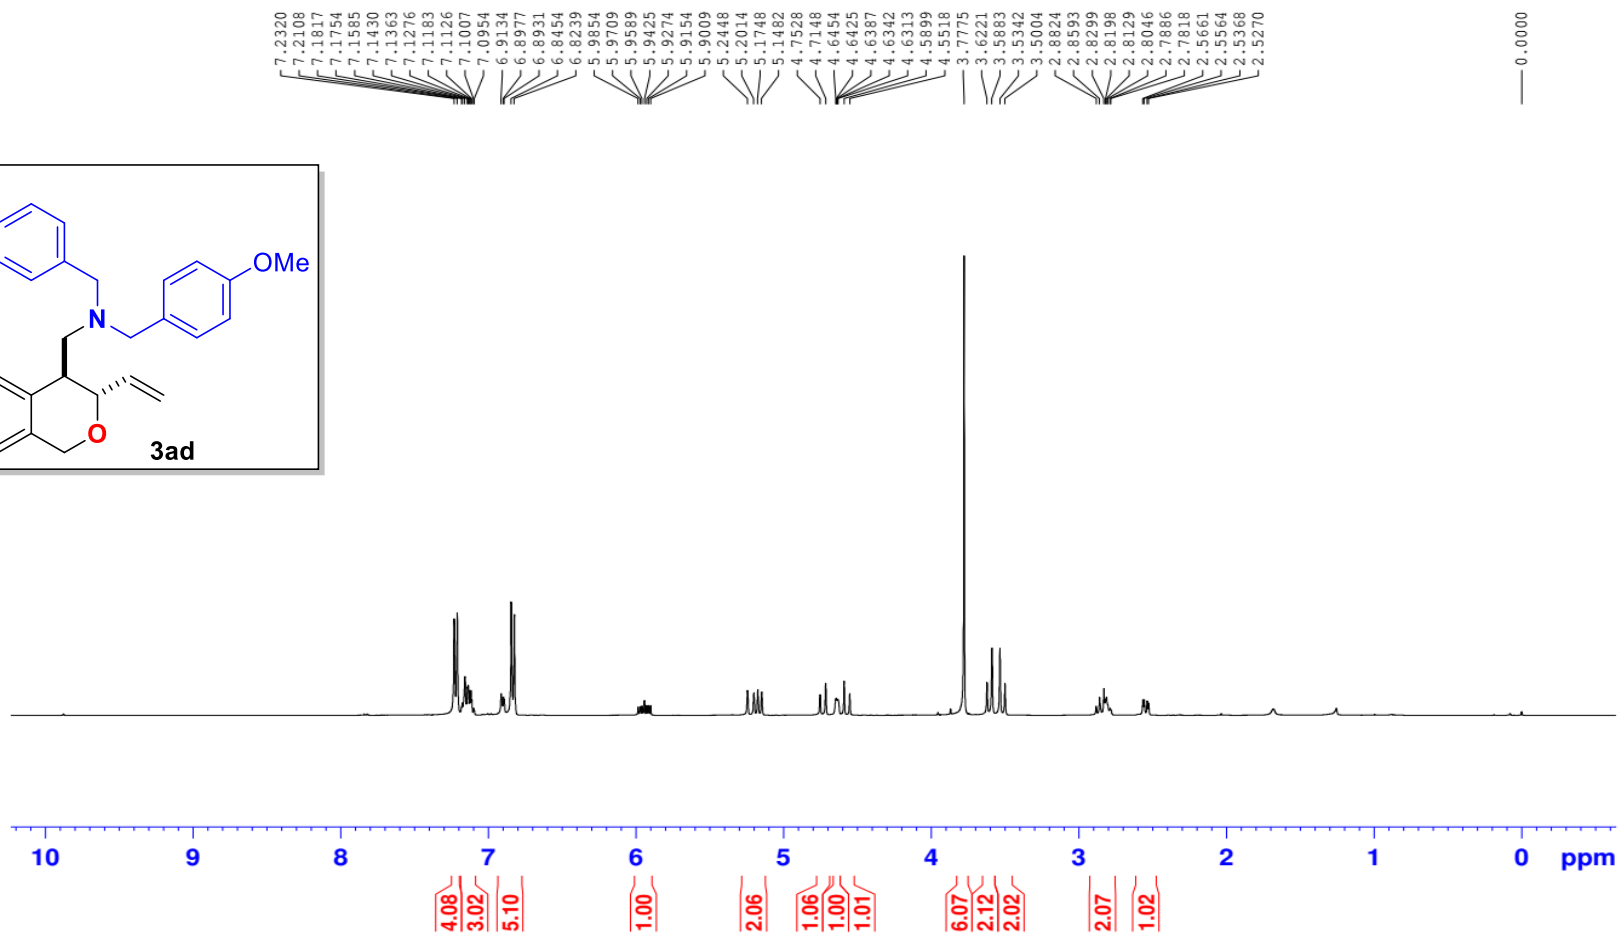

hy-P-3ad <sup>13</sup>C NMR (100MHz CDCl<sub>3</sub>)

hy-aminal-4-ome-c-

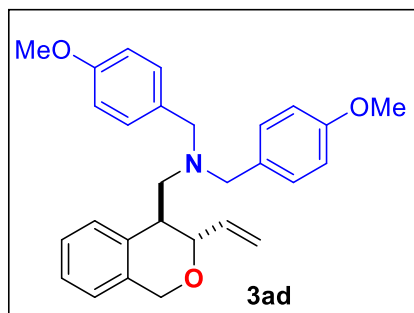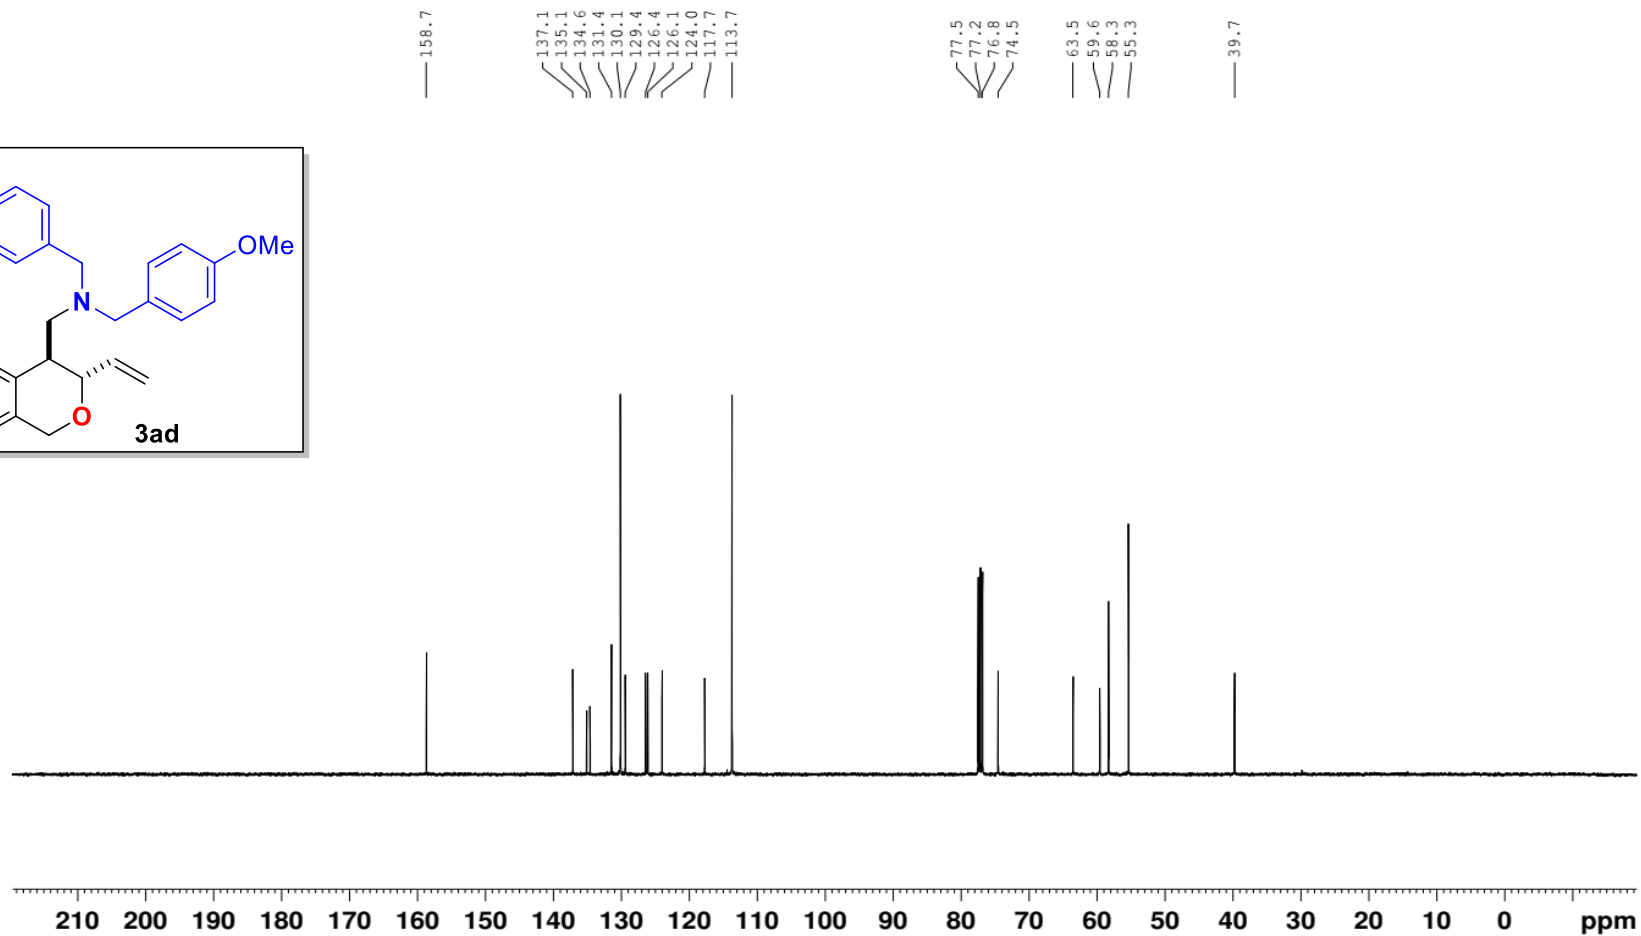

hy-P-3ae <sup>1</sup>H NMR (400MHz CDCl<sub>3</sub>)

hy-aminal-p-f-h-

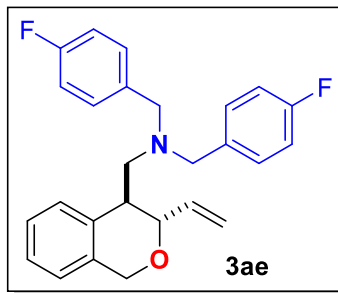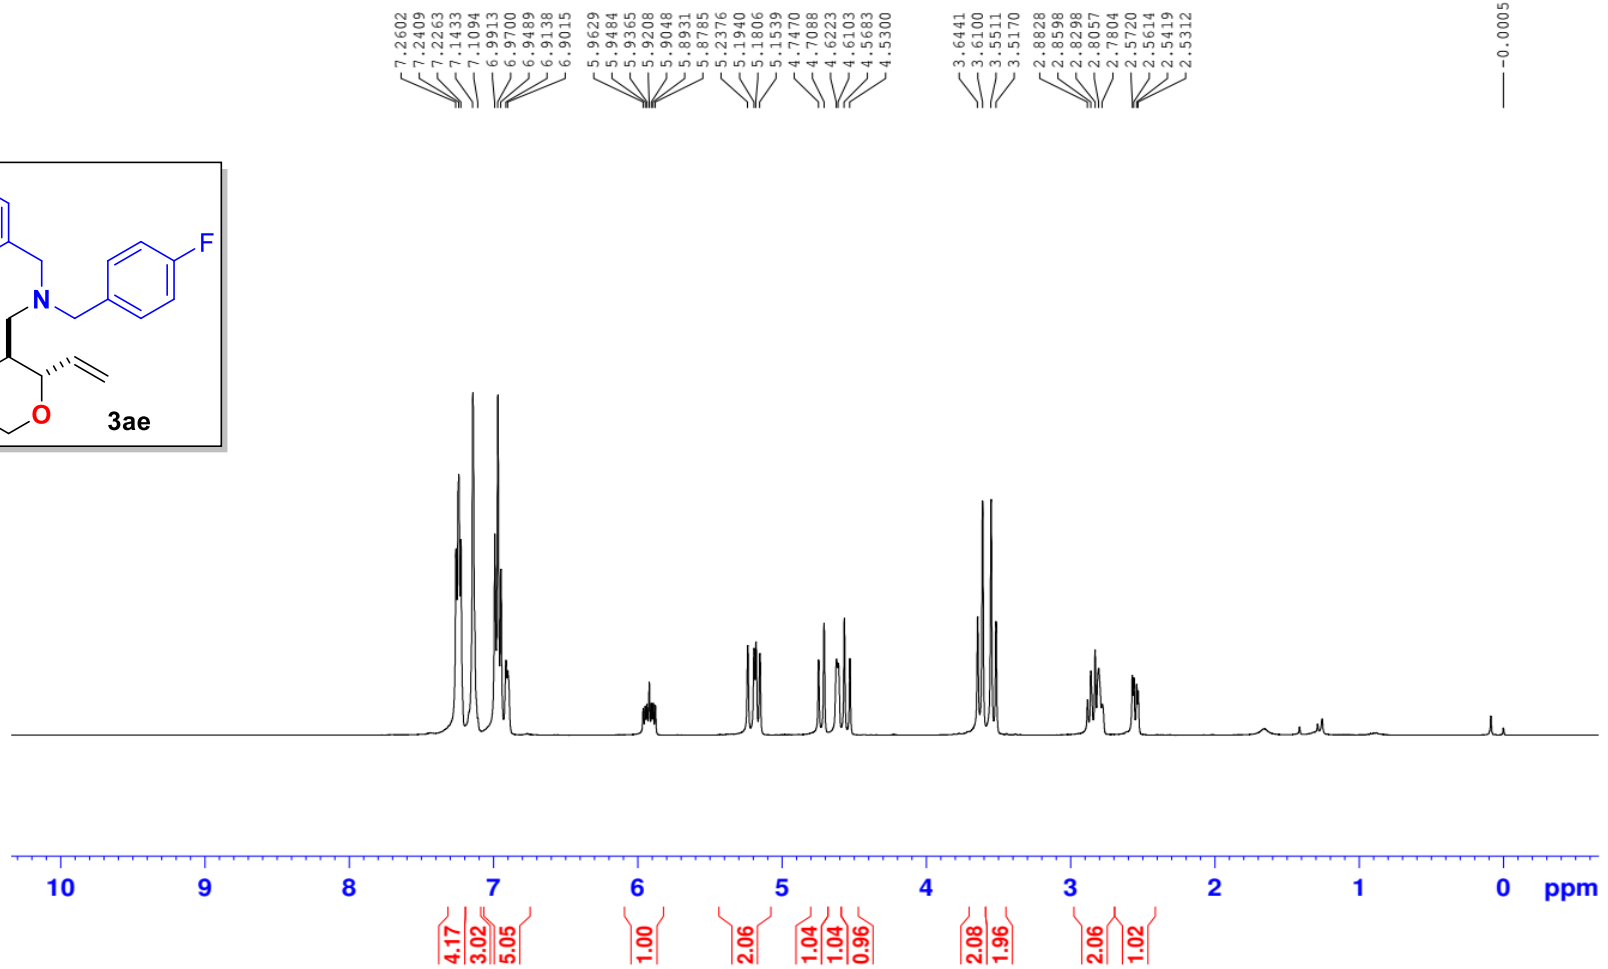

hy-P-3ae <sup>13</sup>C NMR (100MHz CDCl<sub>3</sub>)

hy-aminal-p-f-c-

163.3  
160.8  
136.8  
134.9  
134.9  
134.7  
134.6  
130.4  
130.4  
129.4  
126.5  
126.3  
124.1  
118.0  
115.3  
115.1  
77.5  
77.2  
76.8  
74.2  
63.3  
59.6  
58.4  
39.7

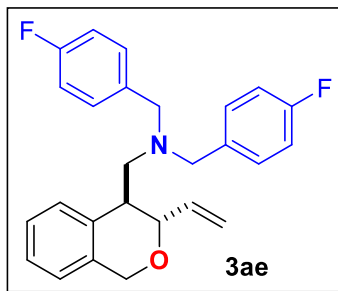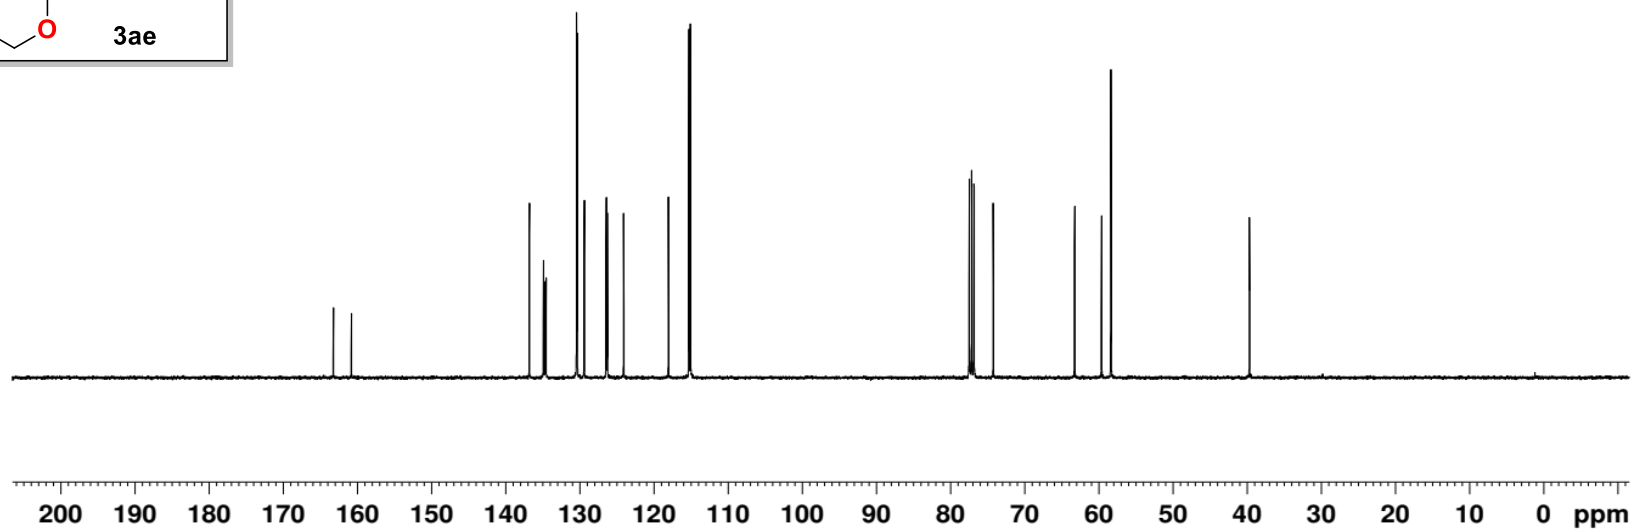

hy-P-3ae <sup>19</sup>F NMR (376MHz CDCl<sub>3</sub>)

hy-aminal-p-f-f

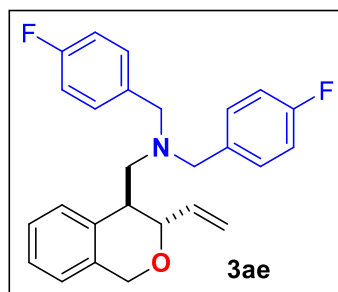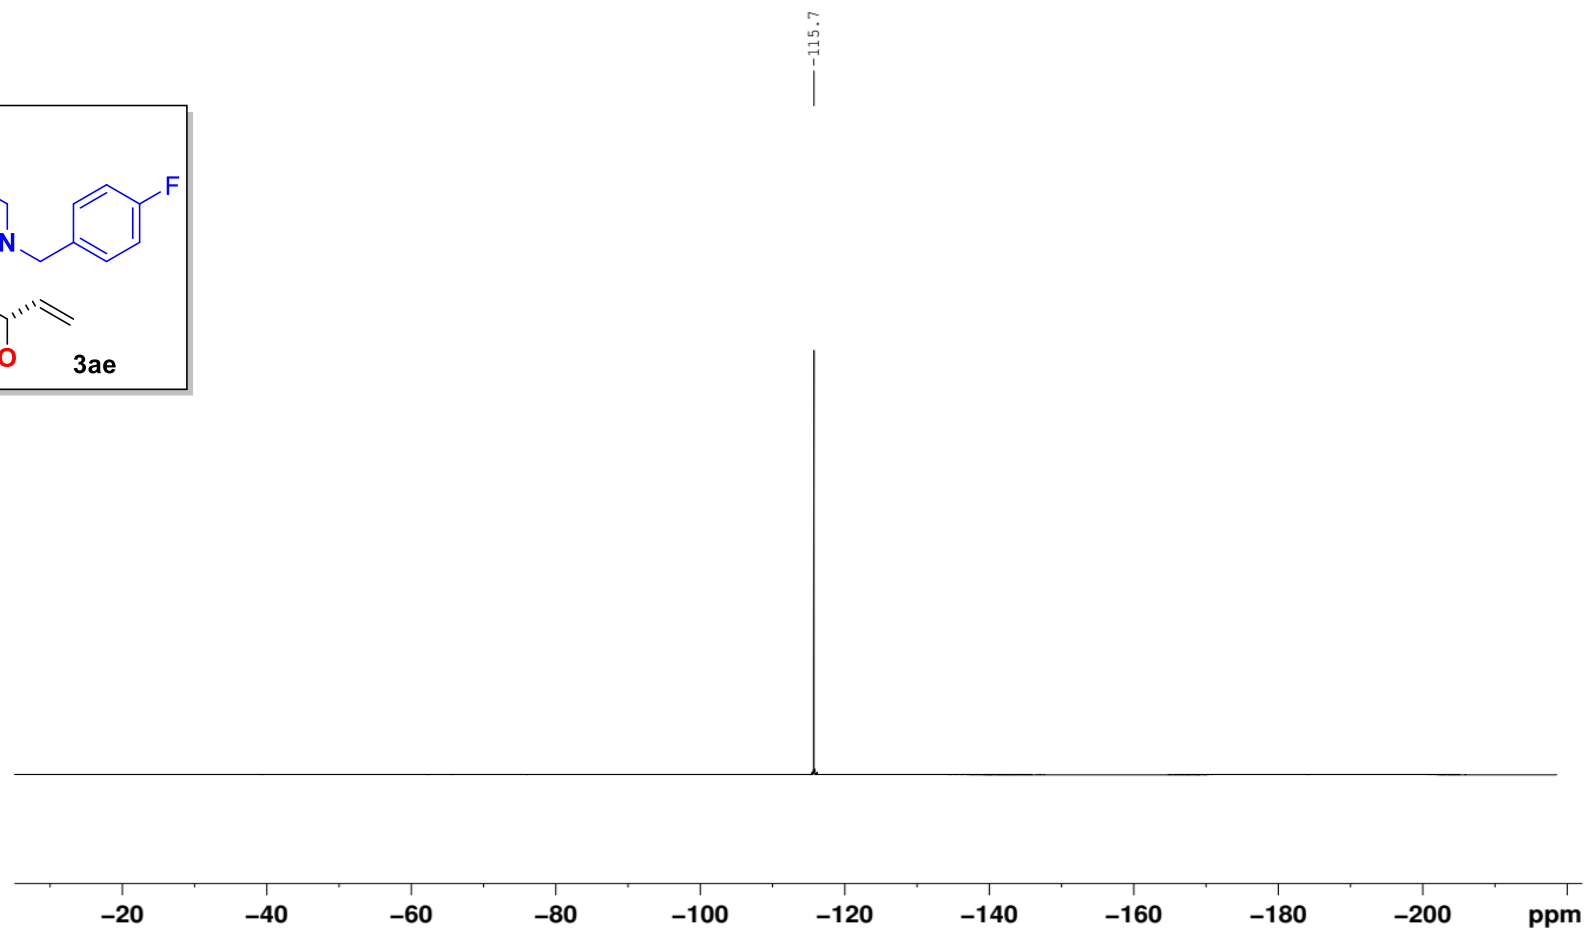

hy-P-3af <sup>1</sup>H NMR (400MHz CDCl<sub>3</sub>)

hy-aminal-m-f-h-

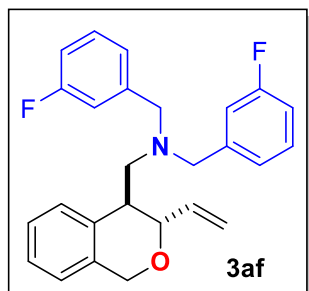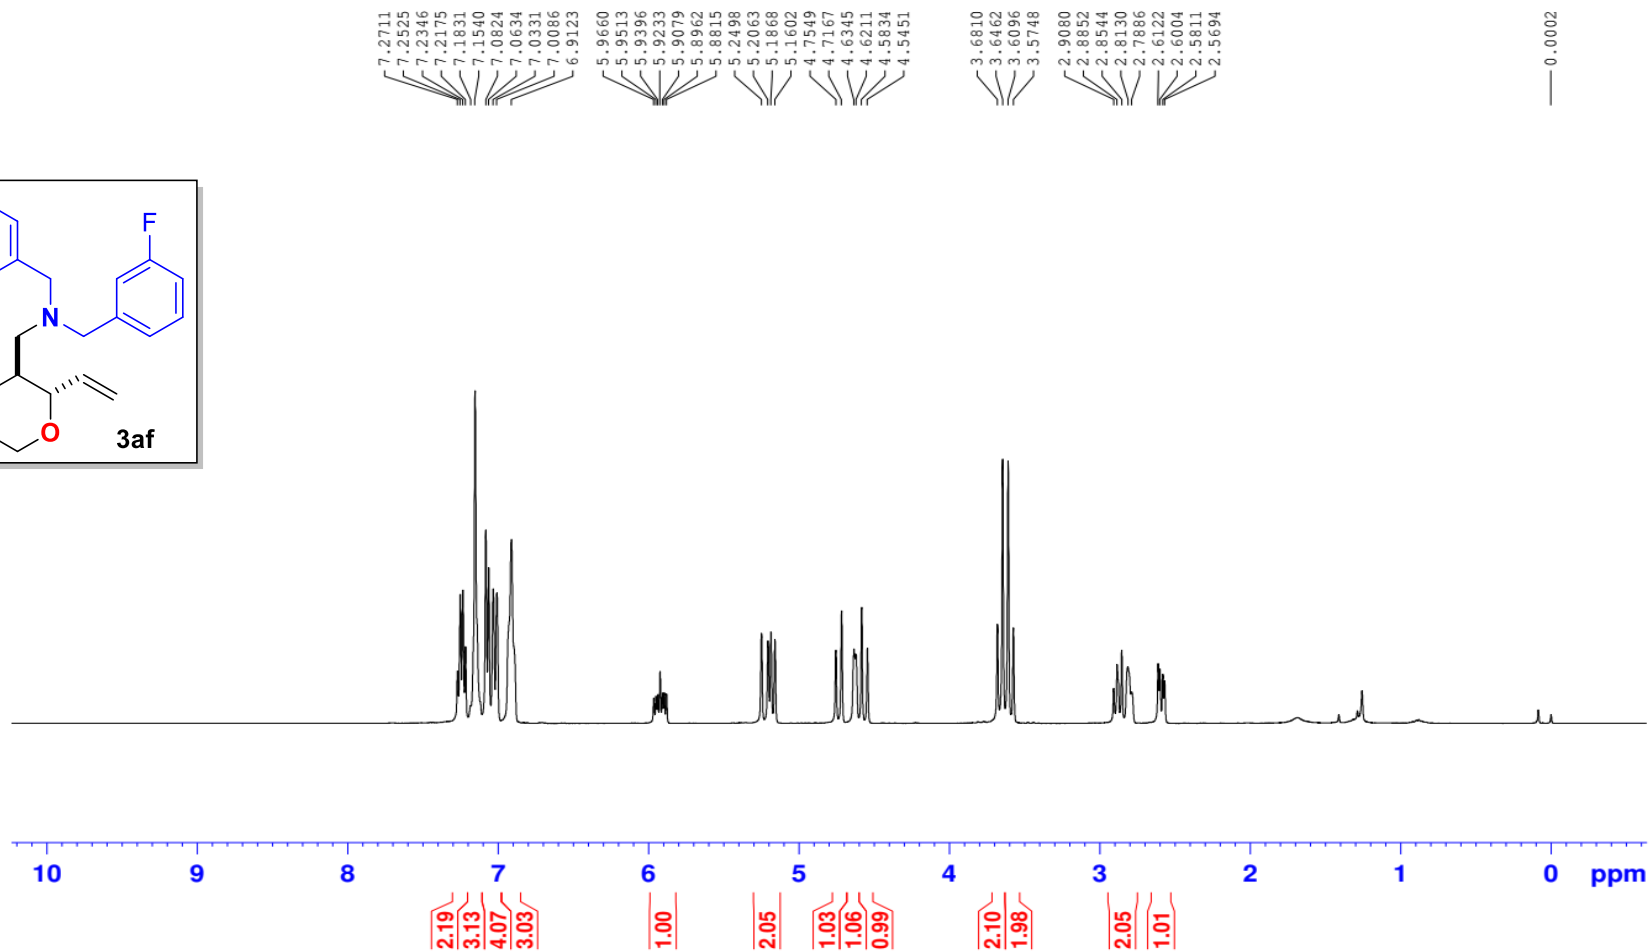

hy-P-3af <sup>13</sup>C NMR (100MHz CDCl<sub>3</sub>)

hy-aminal-m-f-c

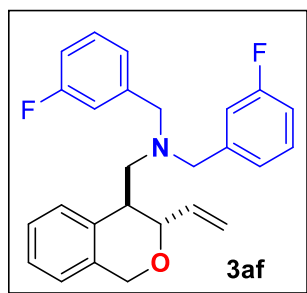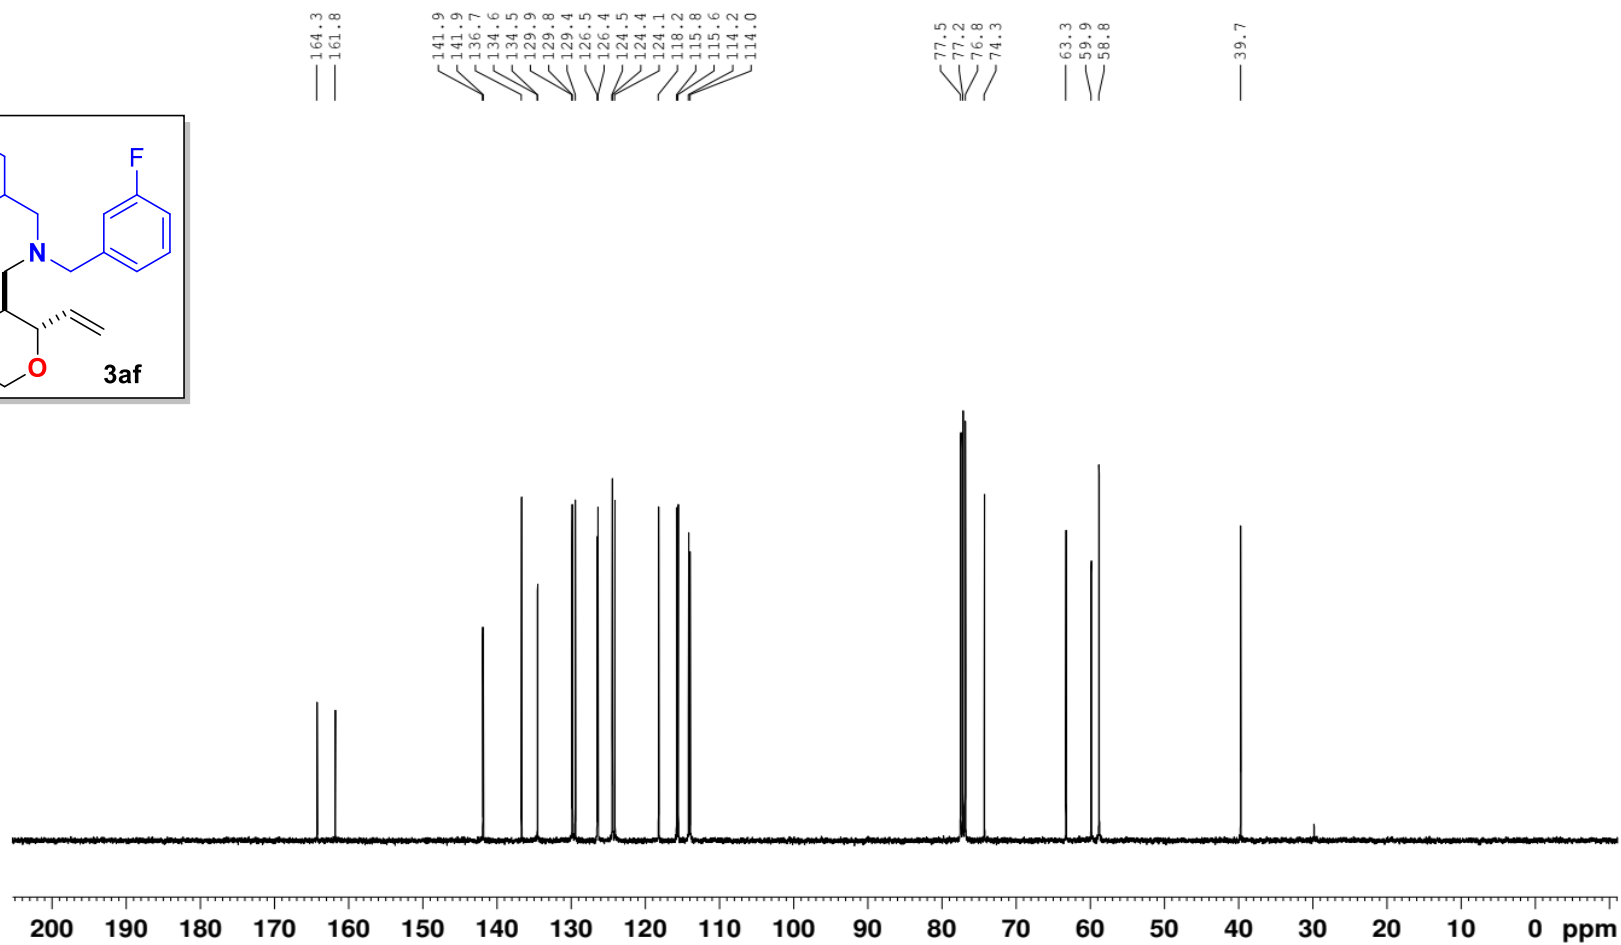



hy-P-**3af**  $^{19}\text{F}$  NMR (376MHz  $\text{CDCl}_3$ )

hy-aminal-m-f-f

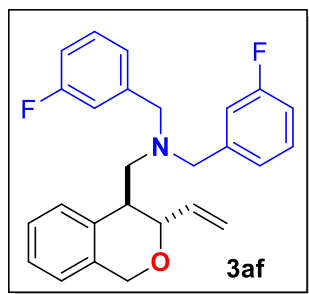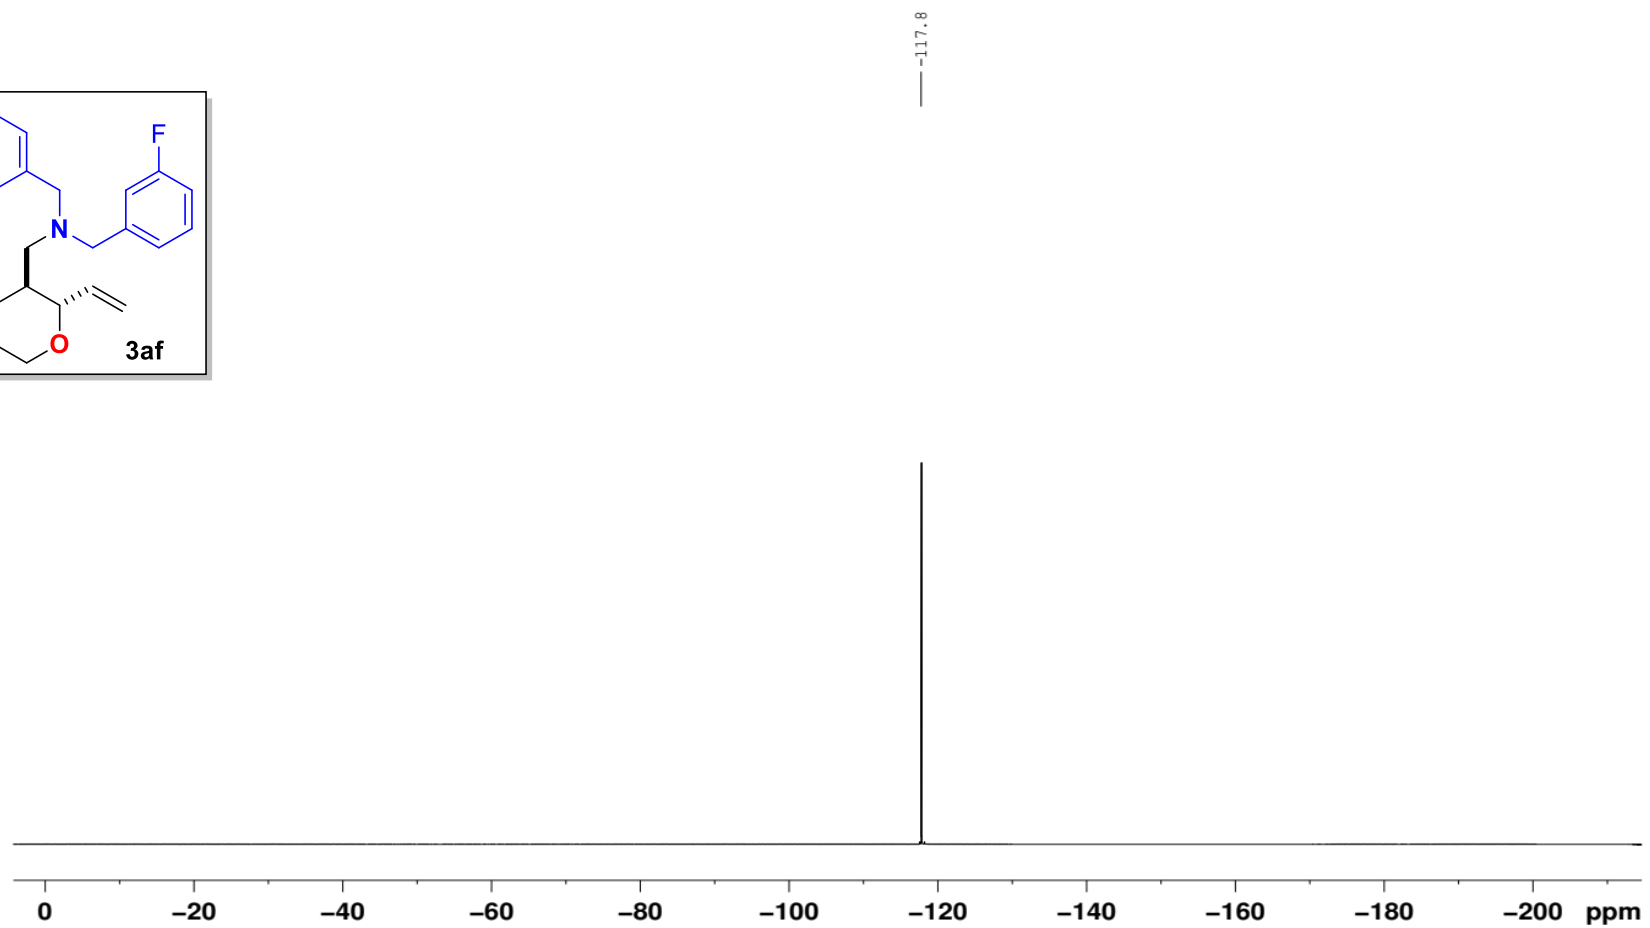

hy-P-3ag <sup>1</sup>H NMR (400MHz CDCl<sub>3</sub>)

hy-aminal-o-f-h-

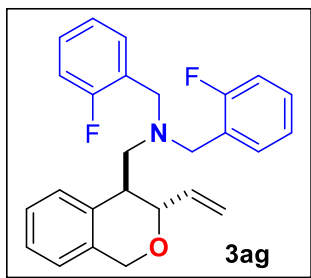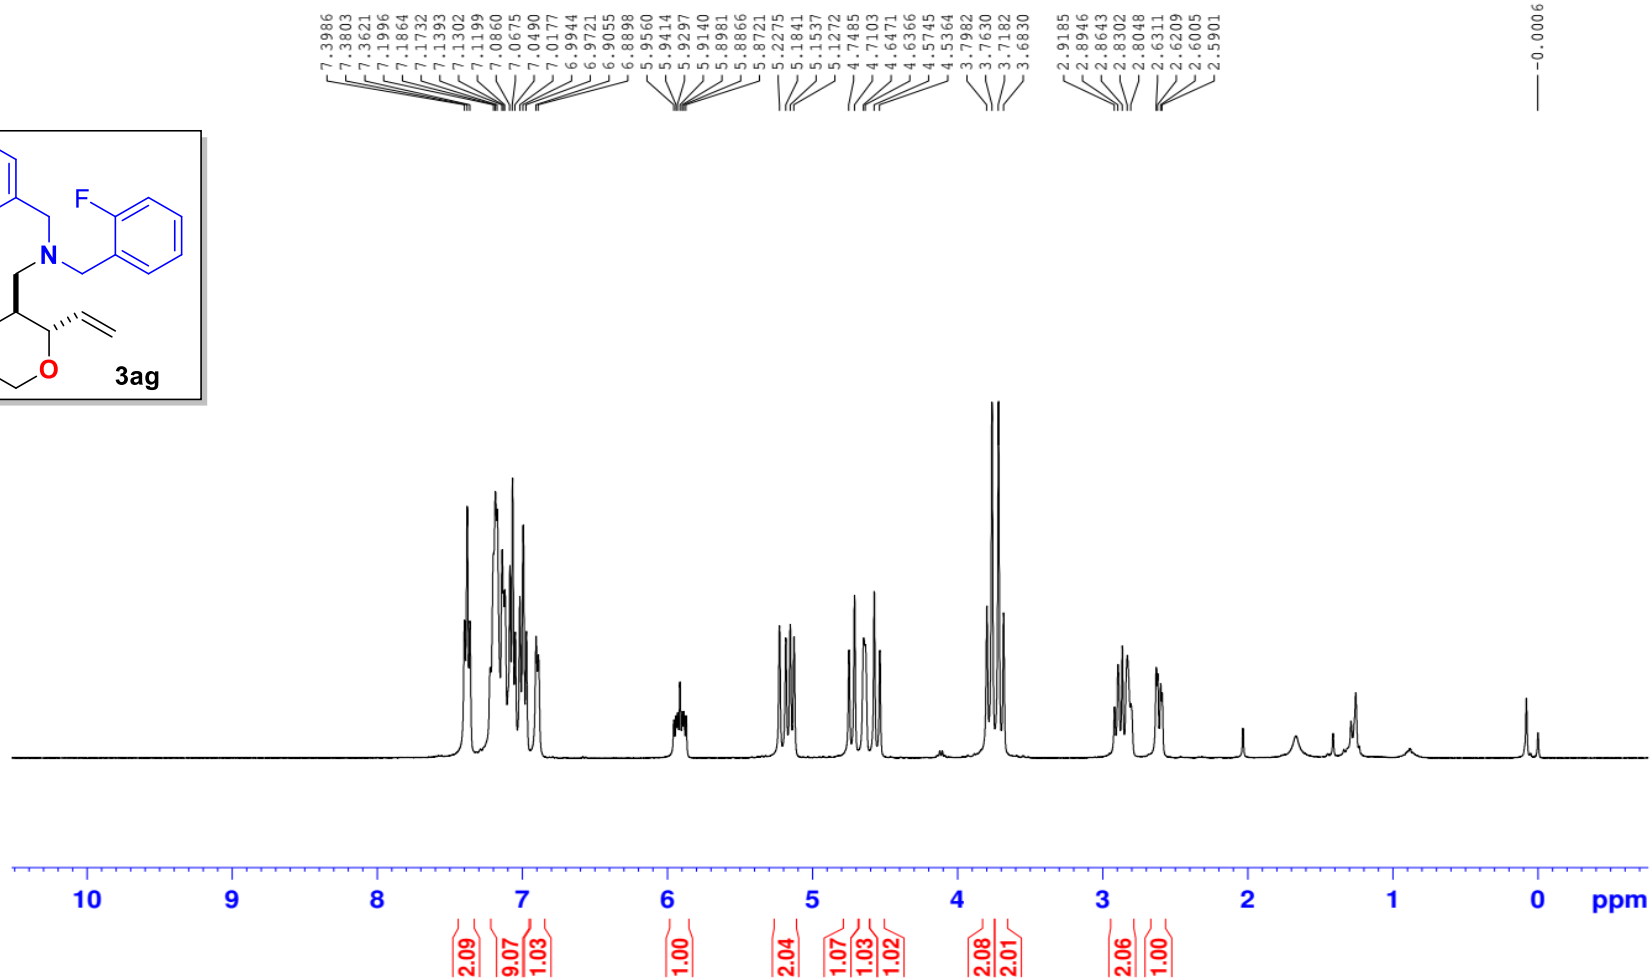

hy-P-3ag <sup>13</sup>C NMR (100MHz CDCl<sub>3</sub>)

hy-aminal-o-f-c-

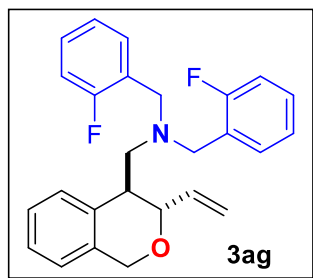

162.7  
160.3

136.9  
134.8  
134.6  
131.4  
131.4  
129.5  
128.8  
128.7  
126.5  
126.2  
126.0  
125.9  
124.0  
124.0  
117.9  
115.4  
115.2

77.5  
77.2  
76.8  
74.2

63.3  
59.6

52.0  
52.0

39.8

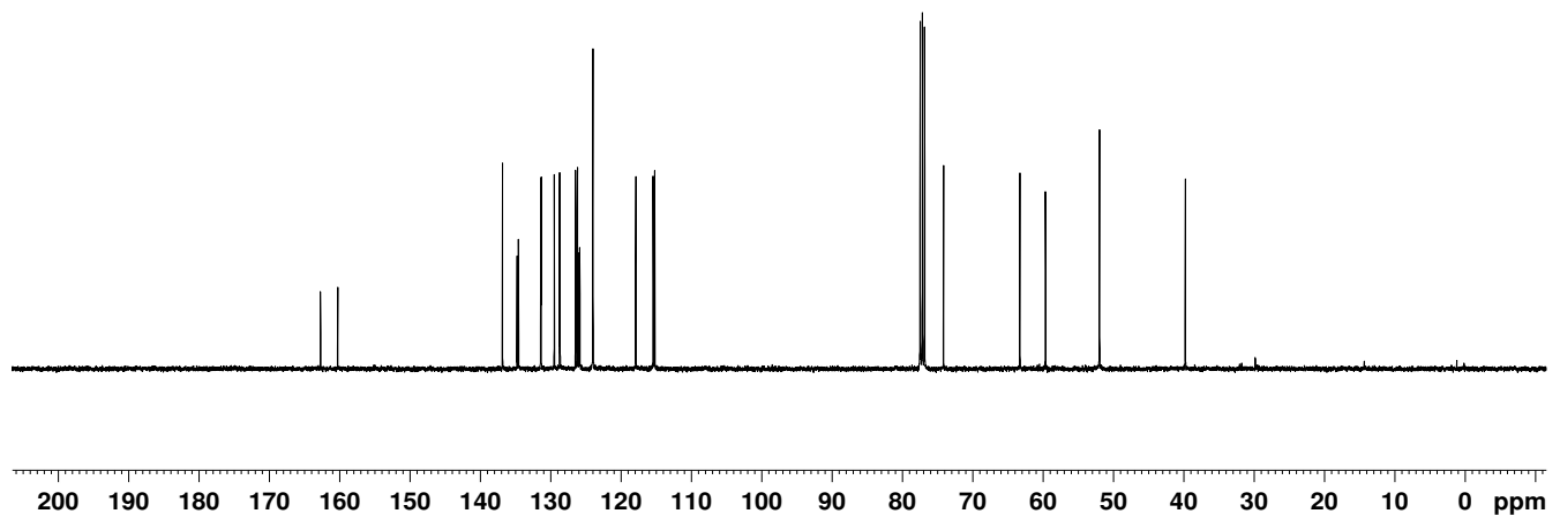

hy-P-3ag <sup>19</sup>F NMR (376MHz CDCl<sub>3</sub>)

hy-aminal-o-f-f

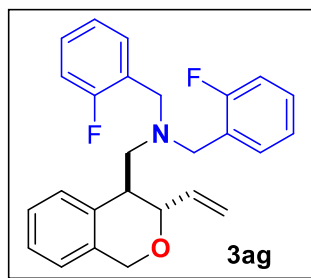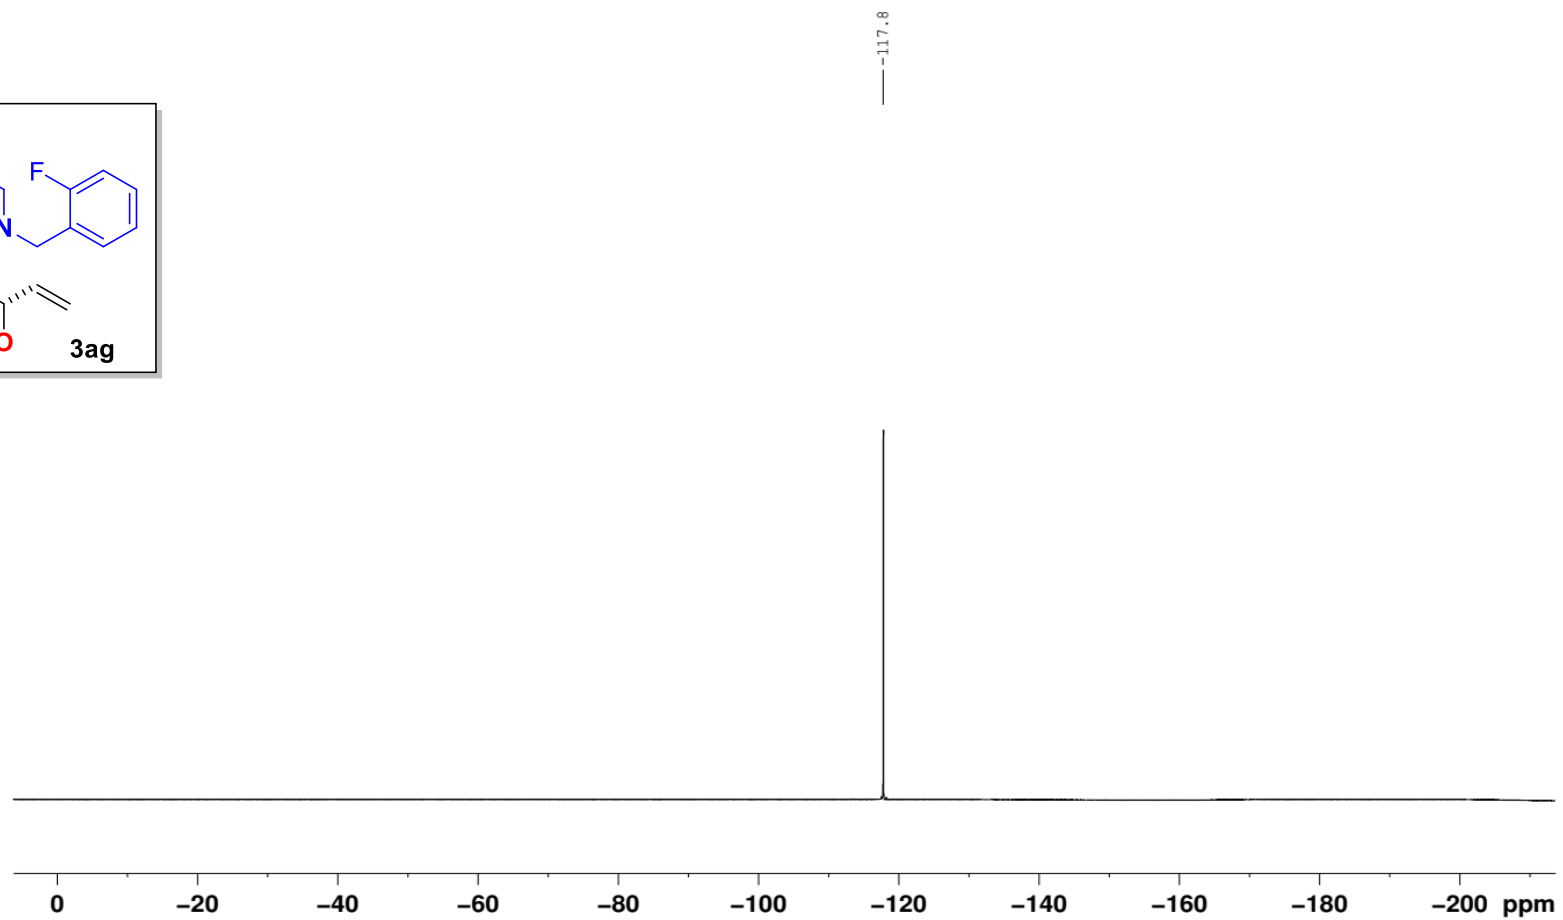

hy-P-3ah <sup>1</sup>H NMR (400MHz CDCl<sub>3</sub>)

hy-aminal-p-cl-h-

7.2618  
7.2567  
7.2456  
7.2405  
7.2200  
7.2154  
7.1941  
7.1747  
7.1627  
7.1582  
7.1485  
7.1411  
7.1368  
7.1271  
7.1167  
7.1130  
6.9188  
6.9087  
6.9033  
6.9017  
5.9640  
5.9493  
5.9375  
5.9225  
5.9209  
5.9059  
5.8940  
5.8794  
5.2440  
5.2406  
5.2371  
5.2006  
5.1971  
5.1934  
5.1899  
5.1865  
5.1833  
5.1632  
5.1600  
5.1567  
4.7515  
4.7133  
4.6281  
4.6253  
4.6206  
4.6149  
4.5770  
4.5386  
3.6396  
3.6050  
3.5485  
3.5138  
2.8753  
2.8526  
2.8246  
2.8174  
2.8065  
2.7914  
2.7857  
2.5747  
2.5658  
2.5469  
2.5381

— 0.0002

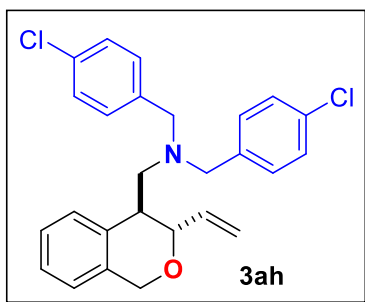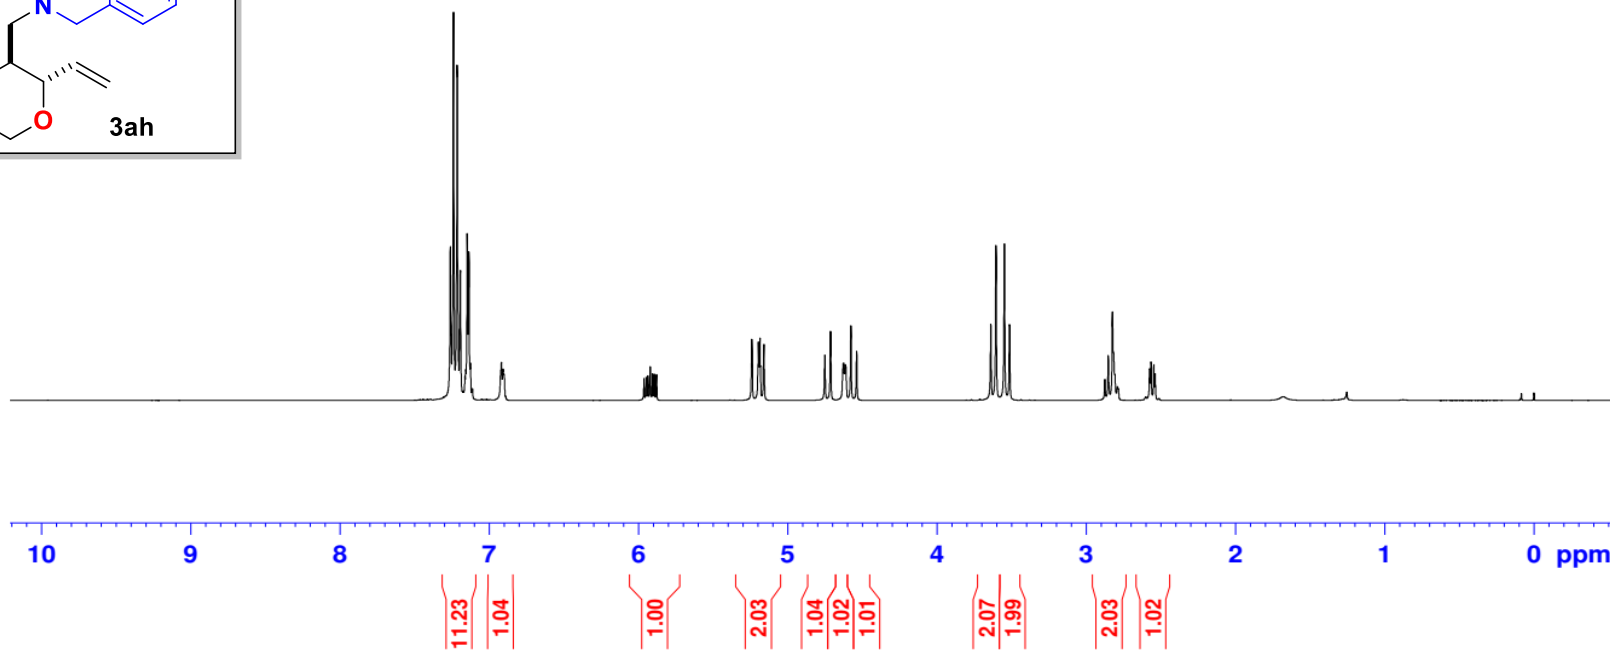

hy-P-3ah <sup>13</sup>C NMR (100MHz CDCl<sub>3</sub>)

hy-aminal-p-cl-c-

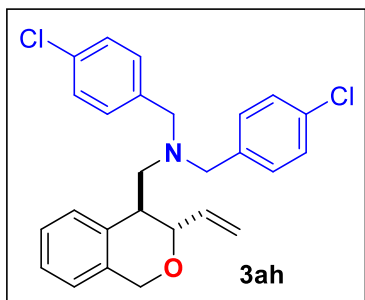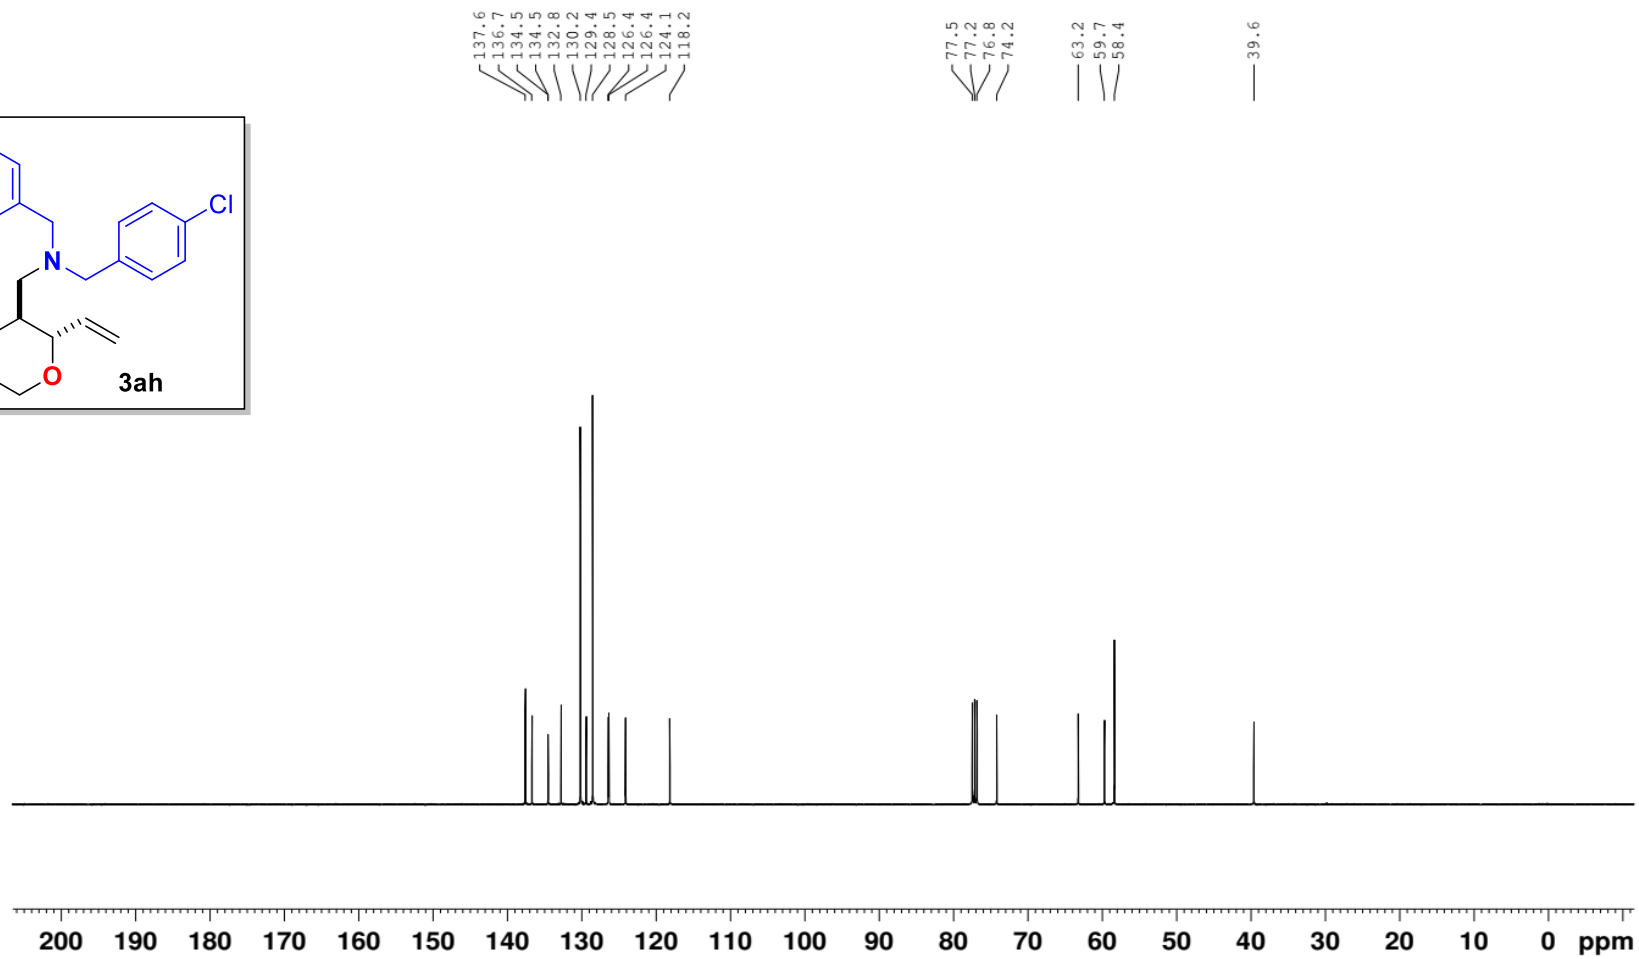

hy-P-3ai <sup>1</sup>H NMR (400MHz CDCl<sub>3</sub>)

hy-amianl-p-br-h-

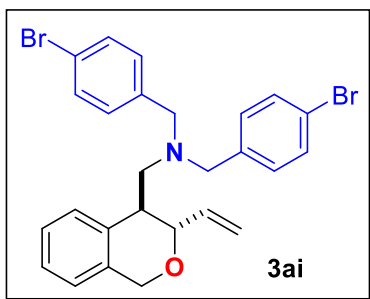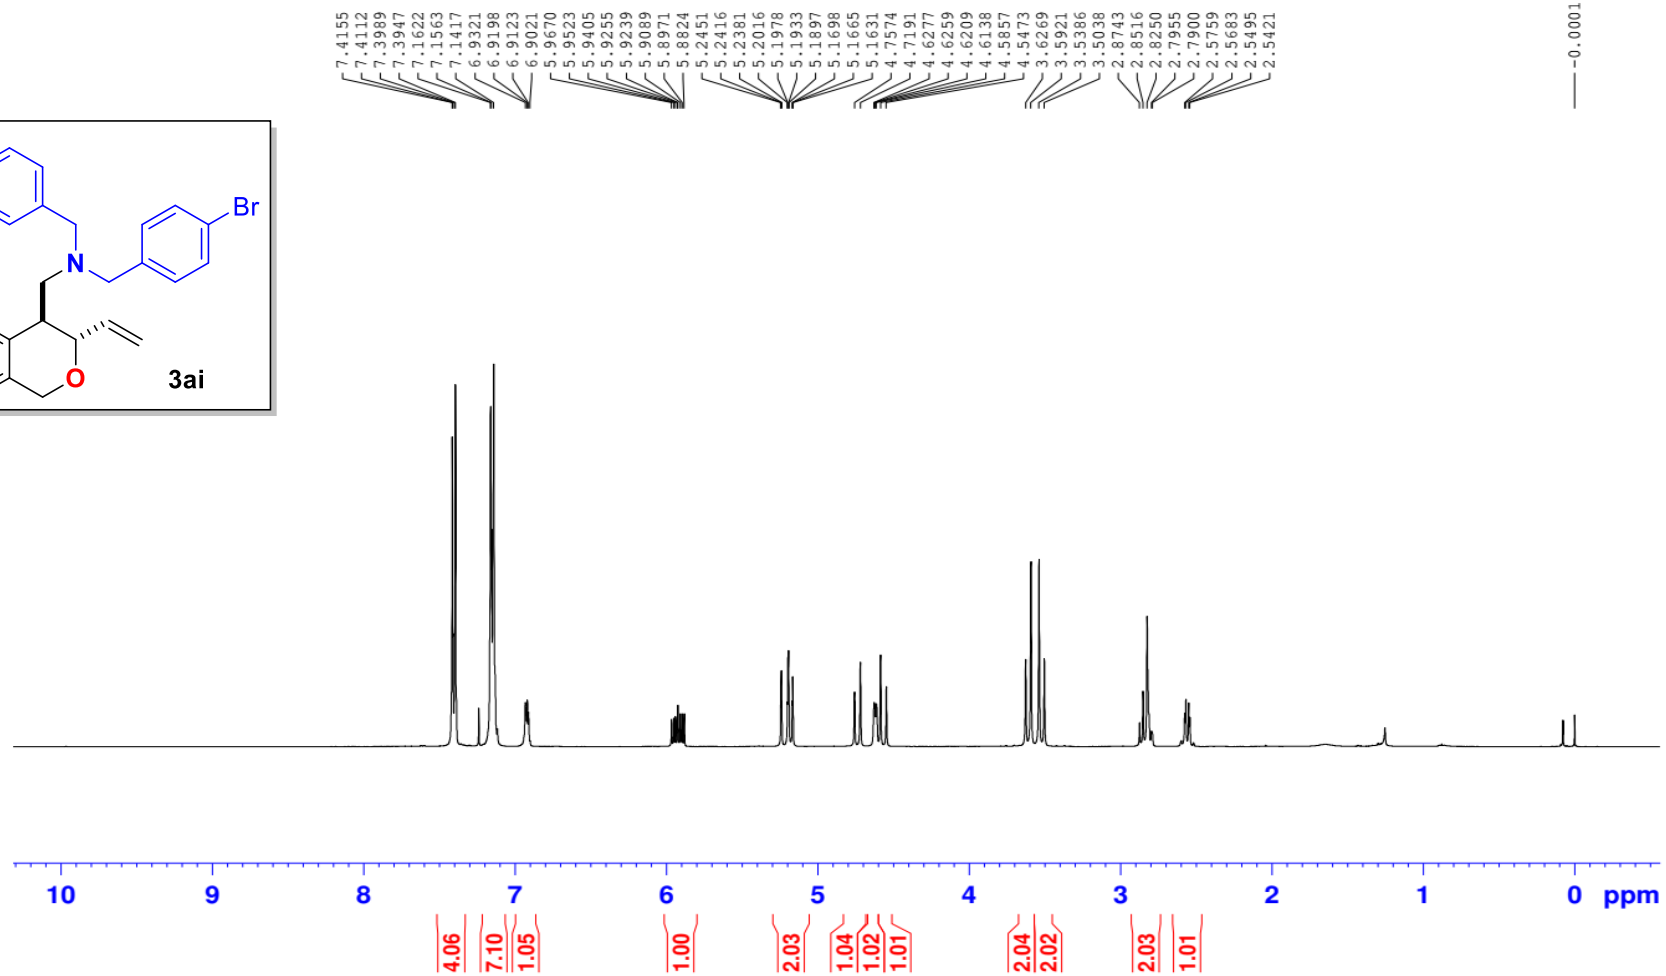

hy-P-3ai <sup>13</sup>C NMR (100MHz CDCl<sub>3</sub>)

hy-aminal-p-br-c-

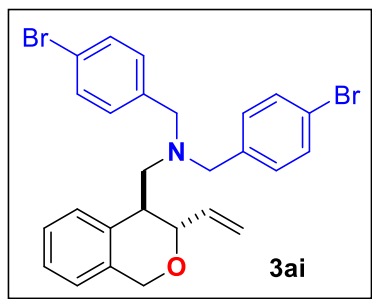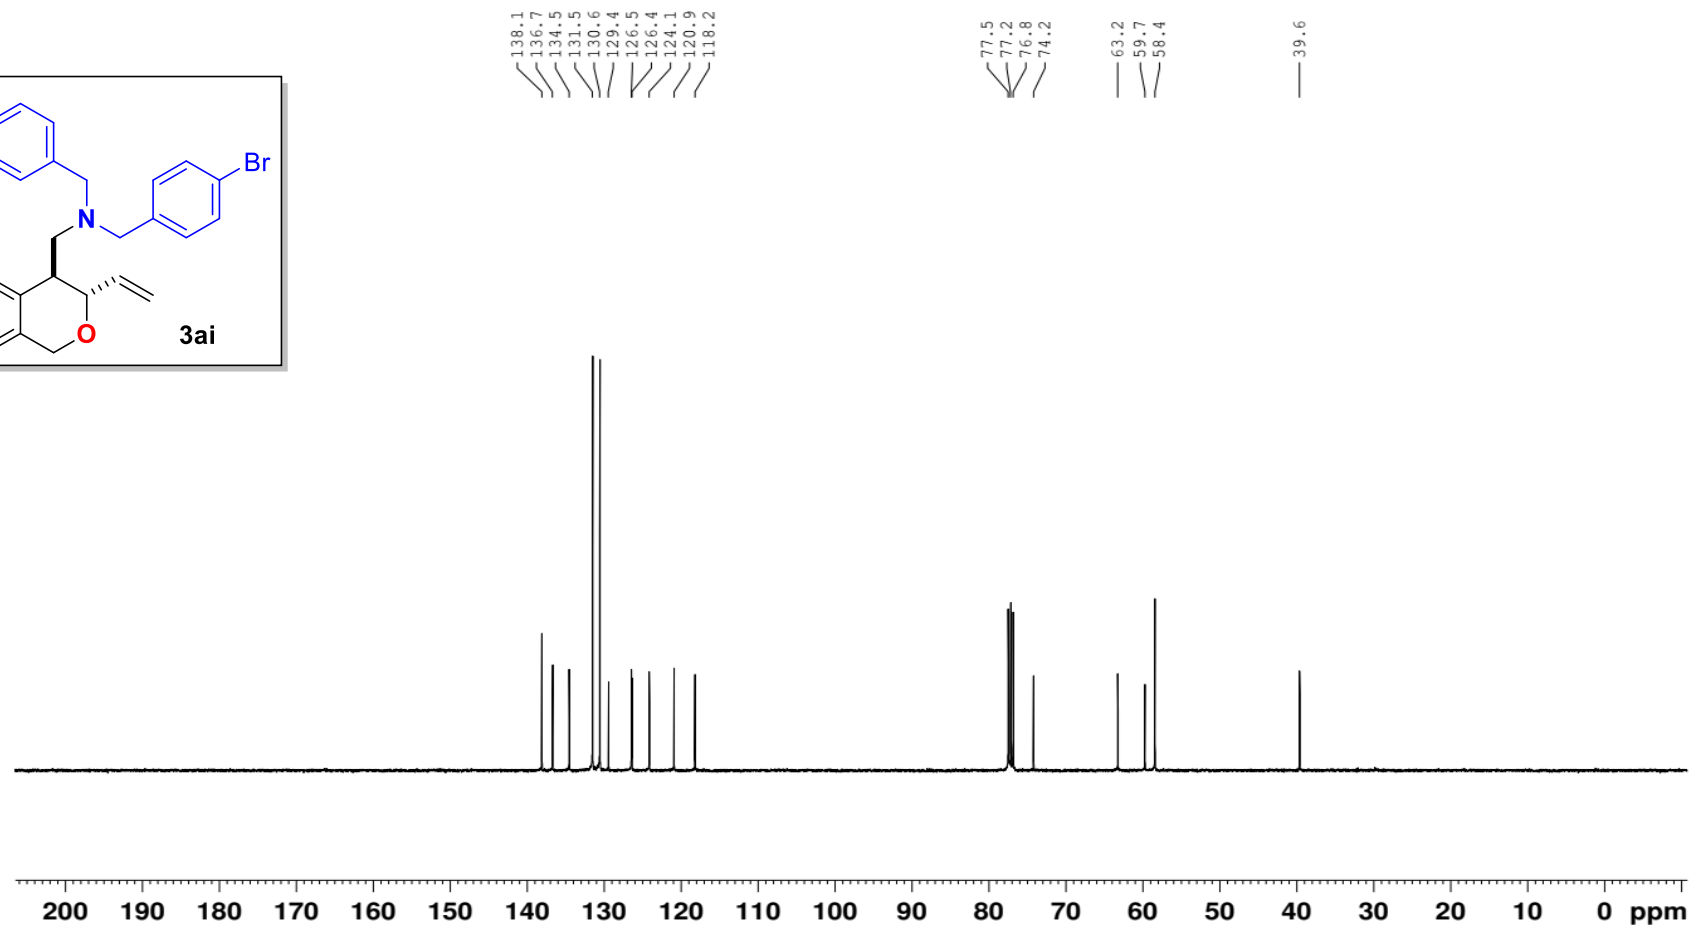



hy-P-3aj <sup>1</sup>H NMR (400MHz CDCl<sub>3</sub>)

hy-aminal-p-cf3-h--

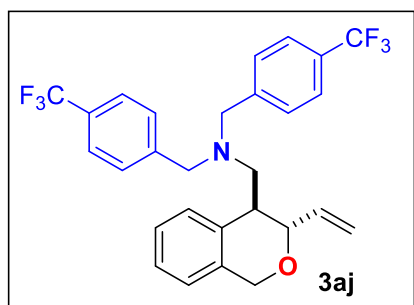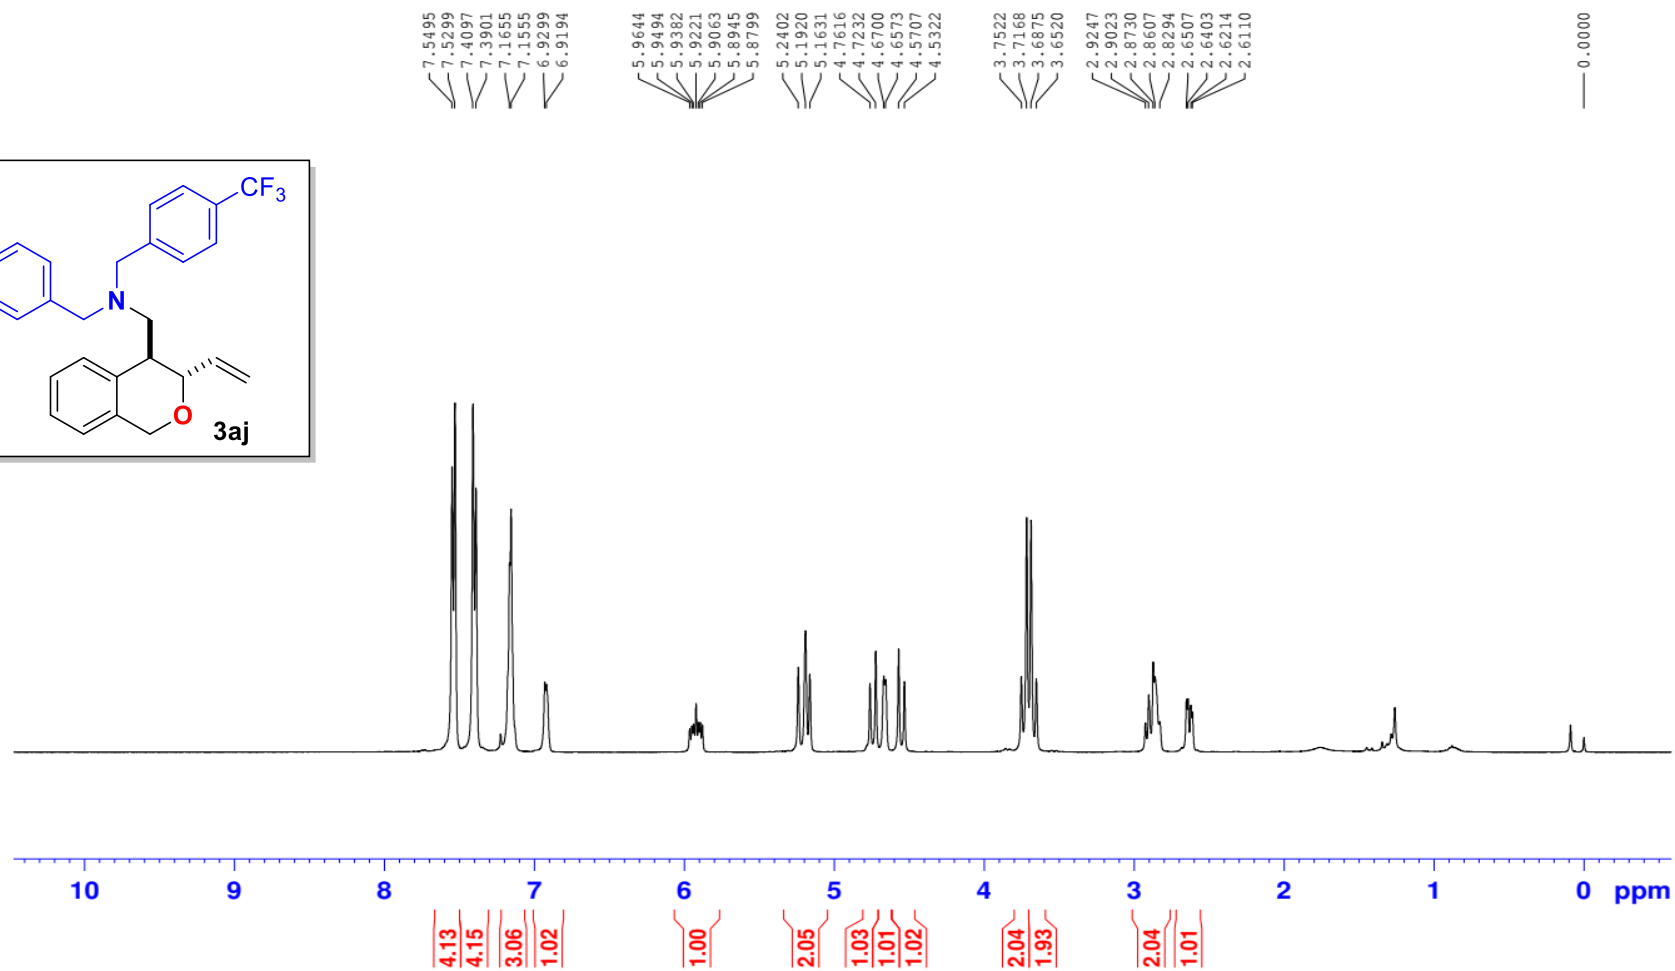

hy-P-3aj <sup>13</sup>C NMR (100MHz CDCl<sub>3</sub>)

hy-aminal-p-cf3-c--

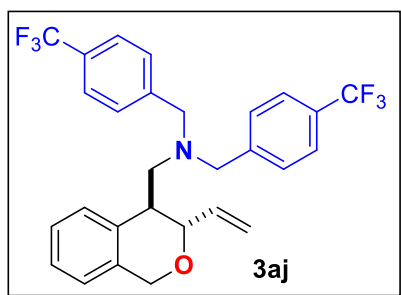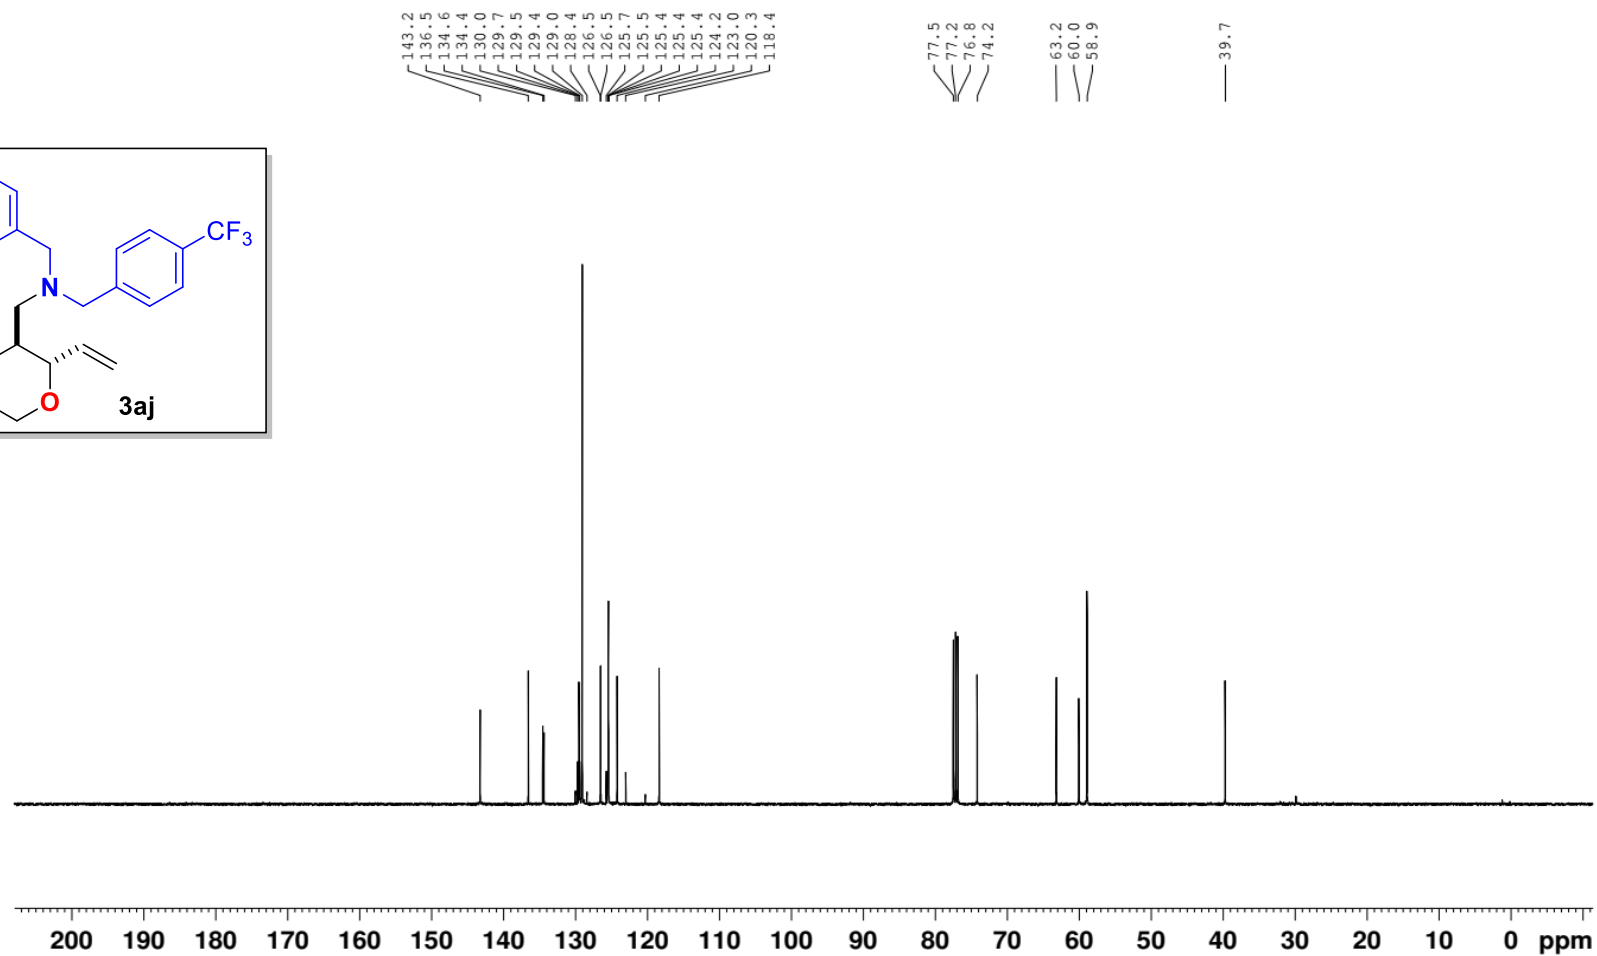

hy-P-3aj <sup>19</sup>F NMR (376MHz CDCl<sub>3</sub>)

hy-aminal-p-cf3-f

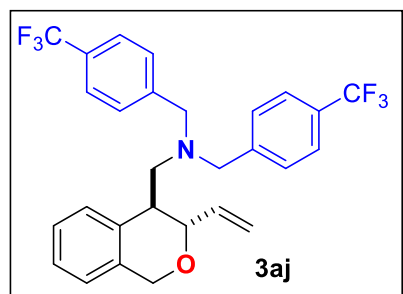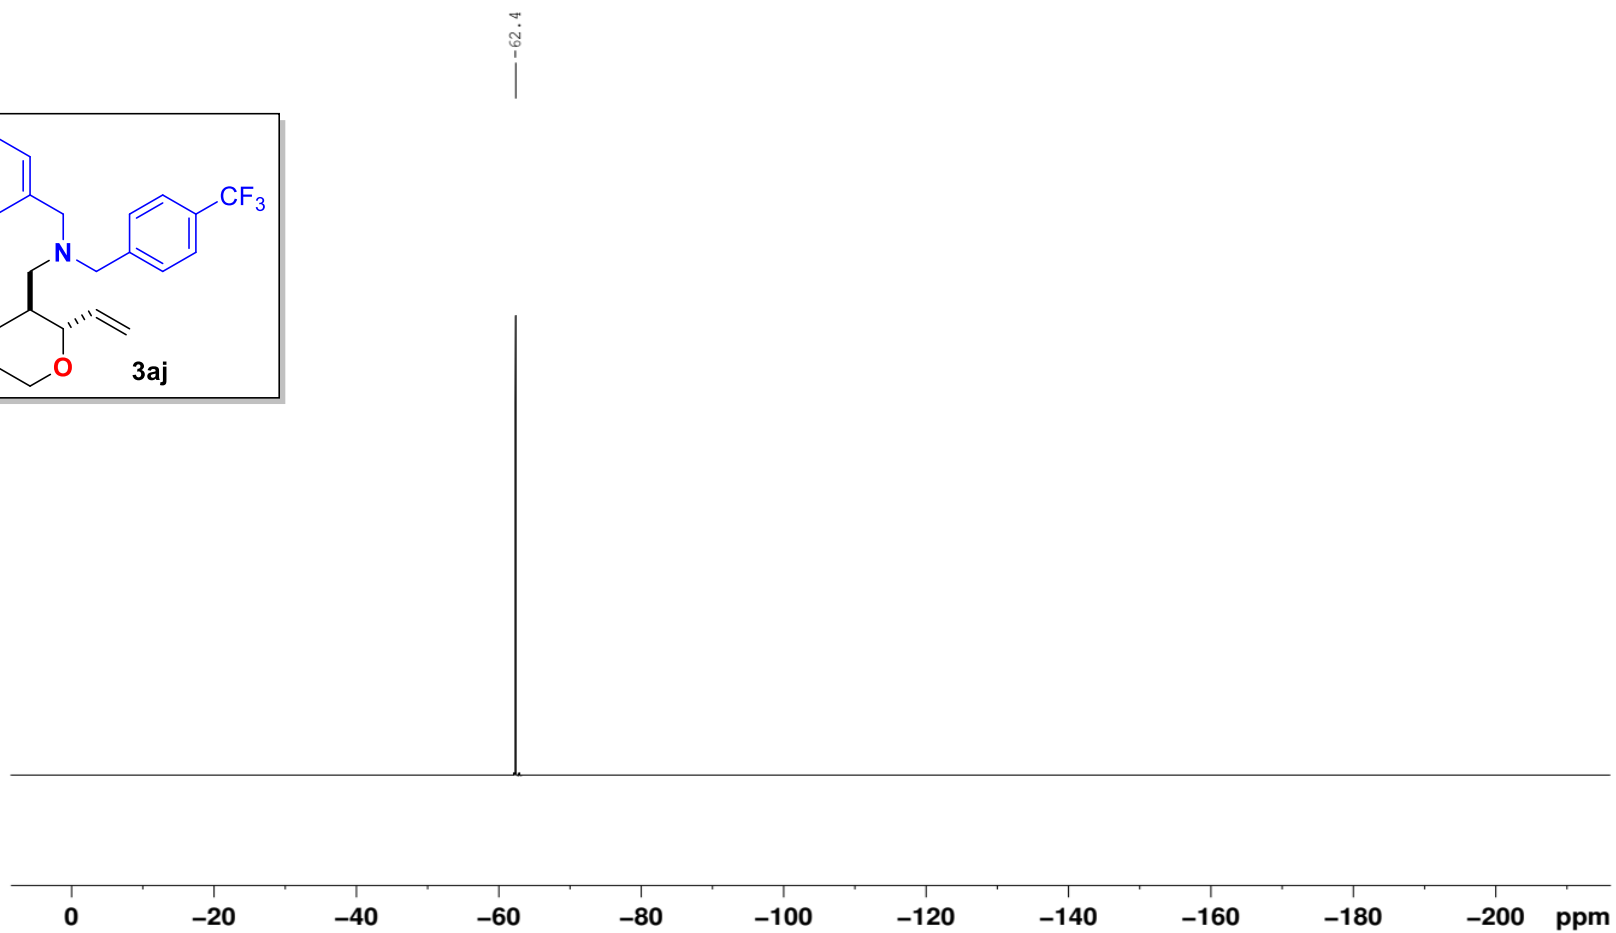

hy-P-3ak <sup>1</sup>H NMR (400MHz CDCl<sub>3</sub>)

hy-aminal-malin-h-

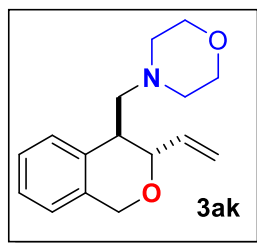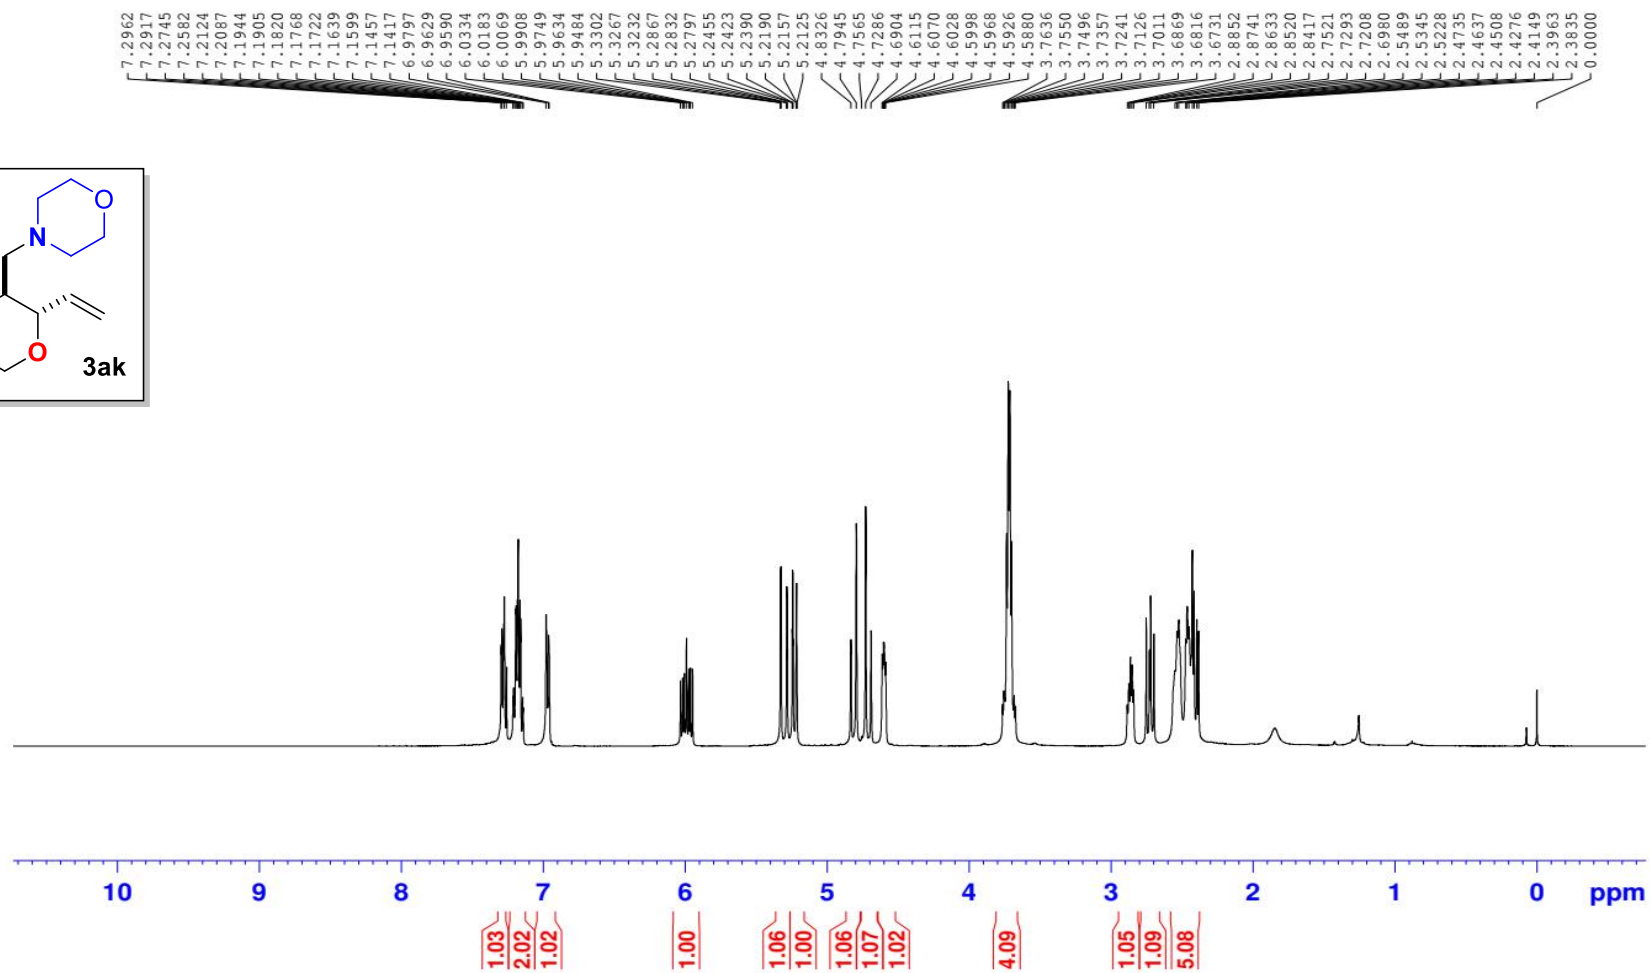

hy-P-3ak <sup>13</sup>C NMR (100MHz CDCl<sub>3</sub>)

hy-aminal-malin-c

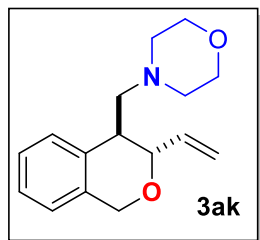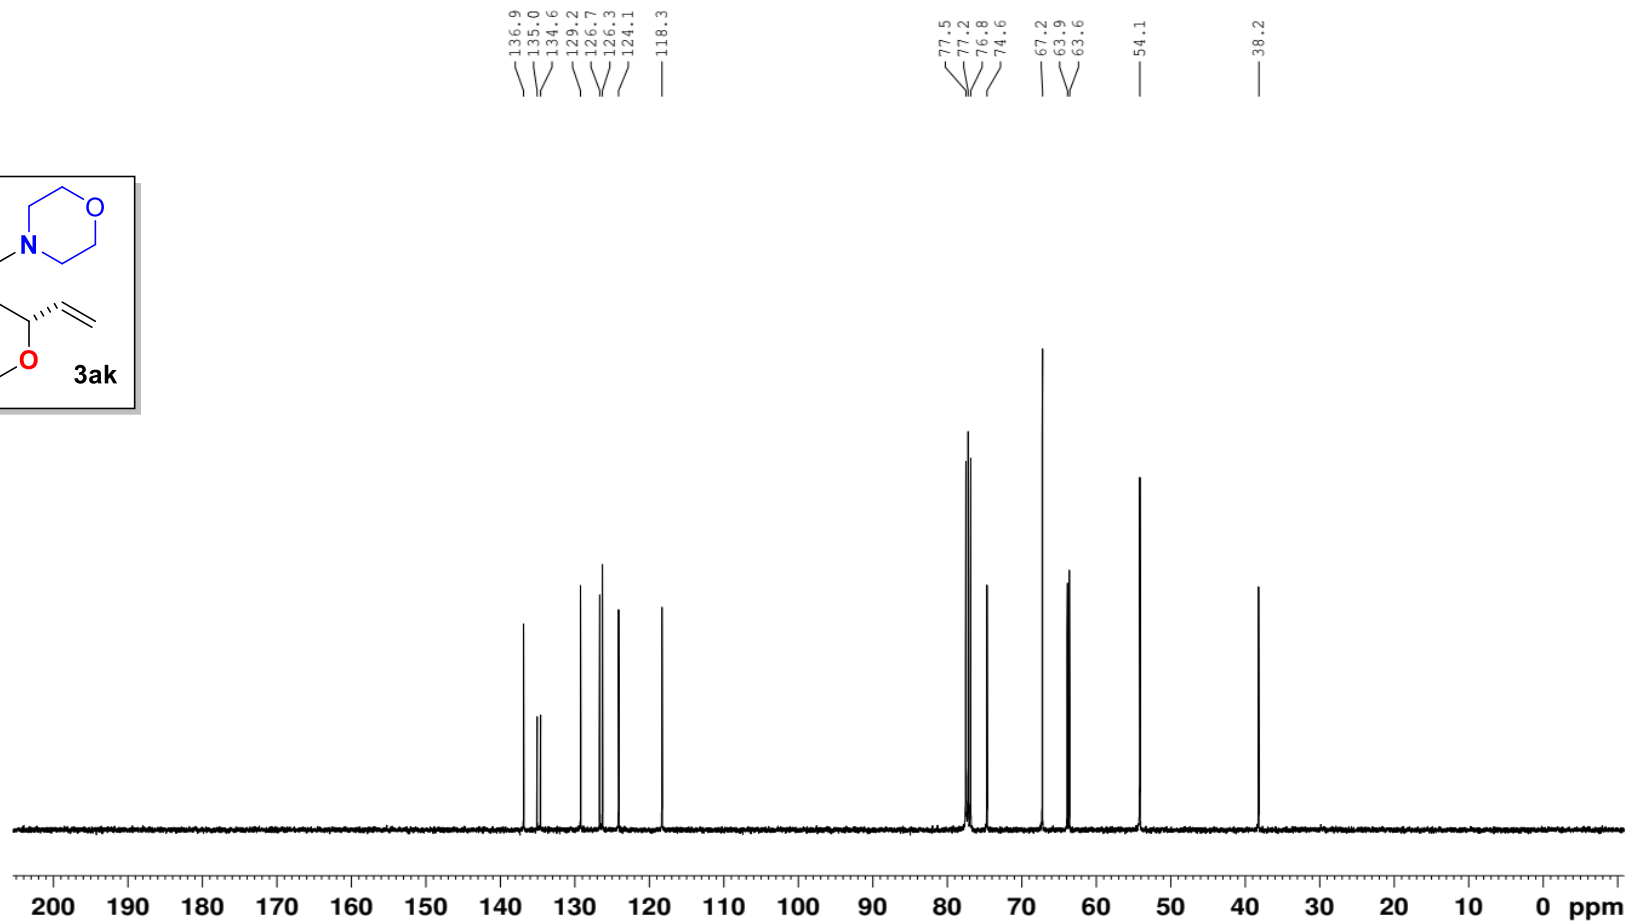

hy-P-3al <sup>1</sup>H NMR (400MHz CDCl<sub>3</sub>)

hy-aminal-npr-h--

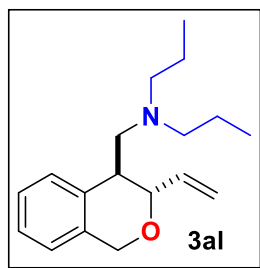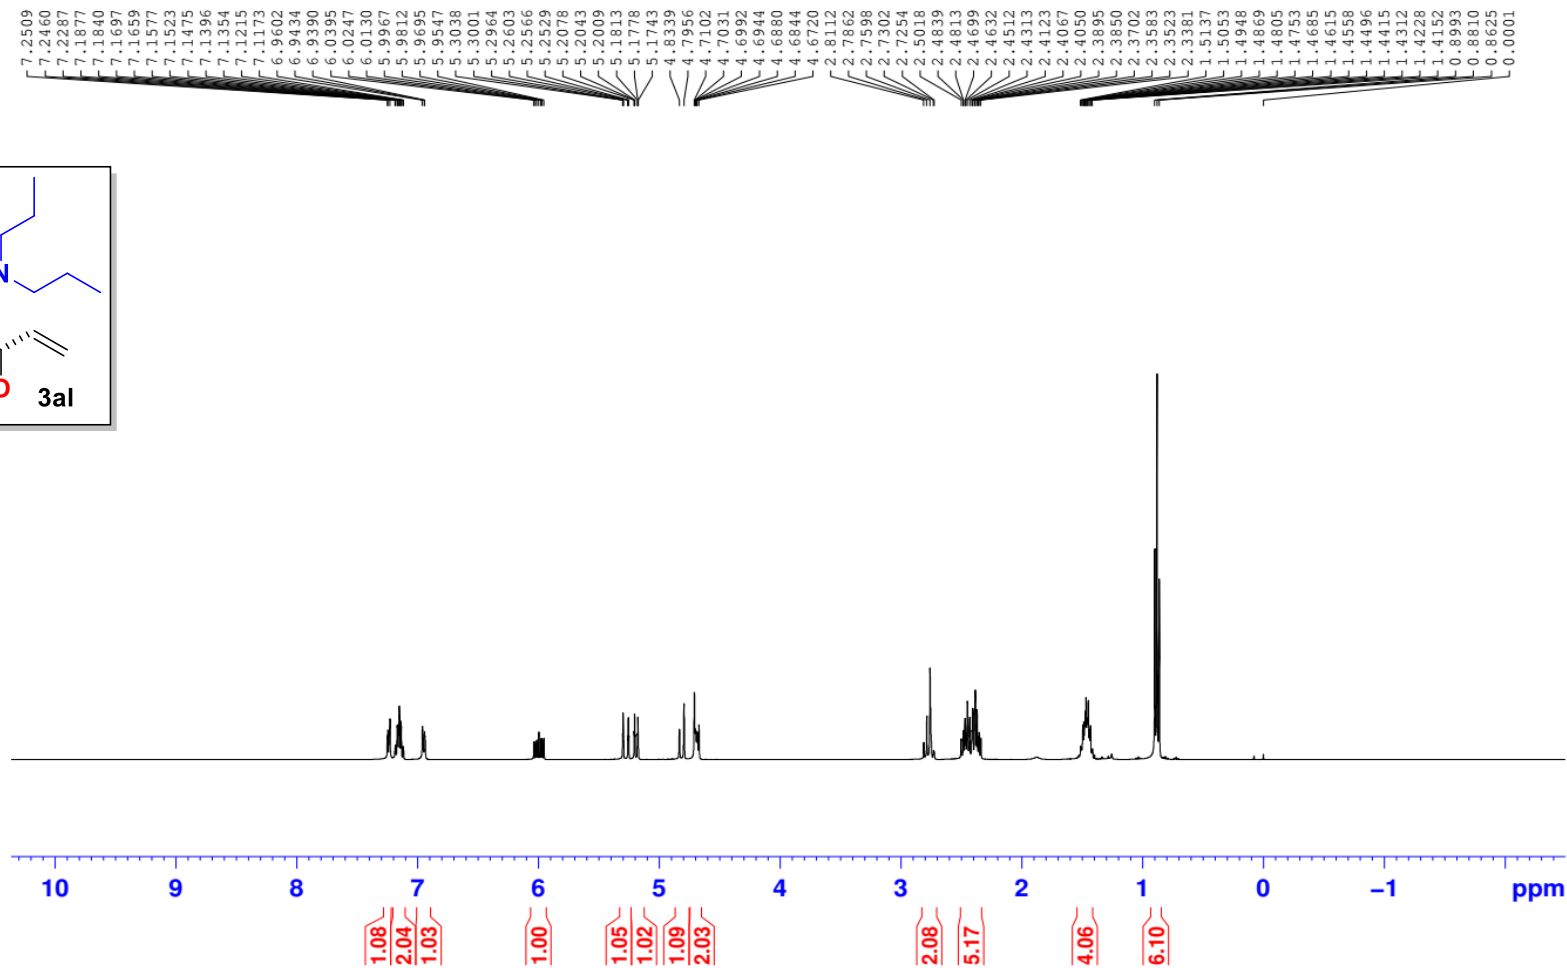

hy-P-3al <sup>13</sup>C NMR (100MHz CDCl<sub>3</sub>)

hy-aminal-npr-c

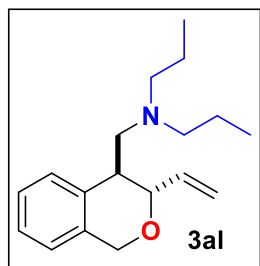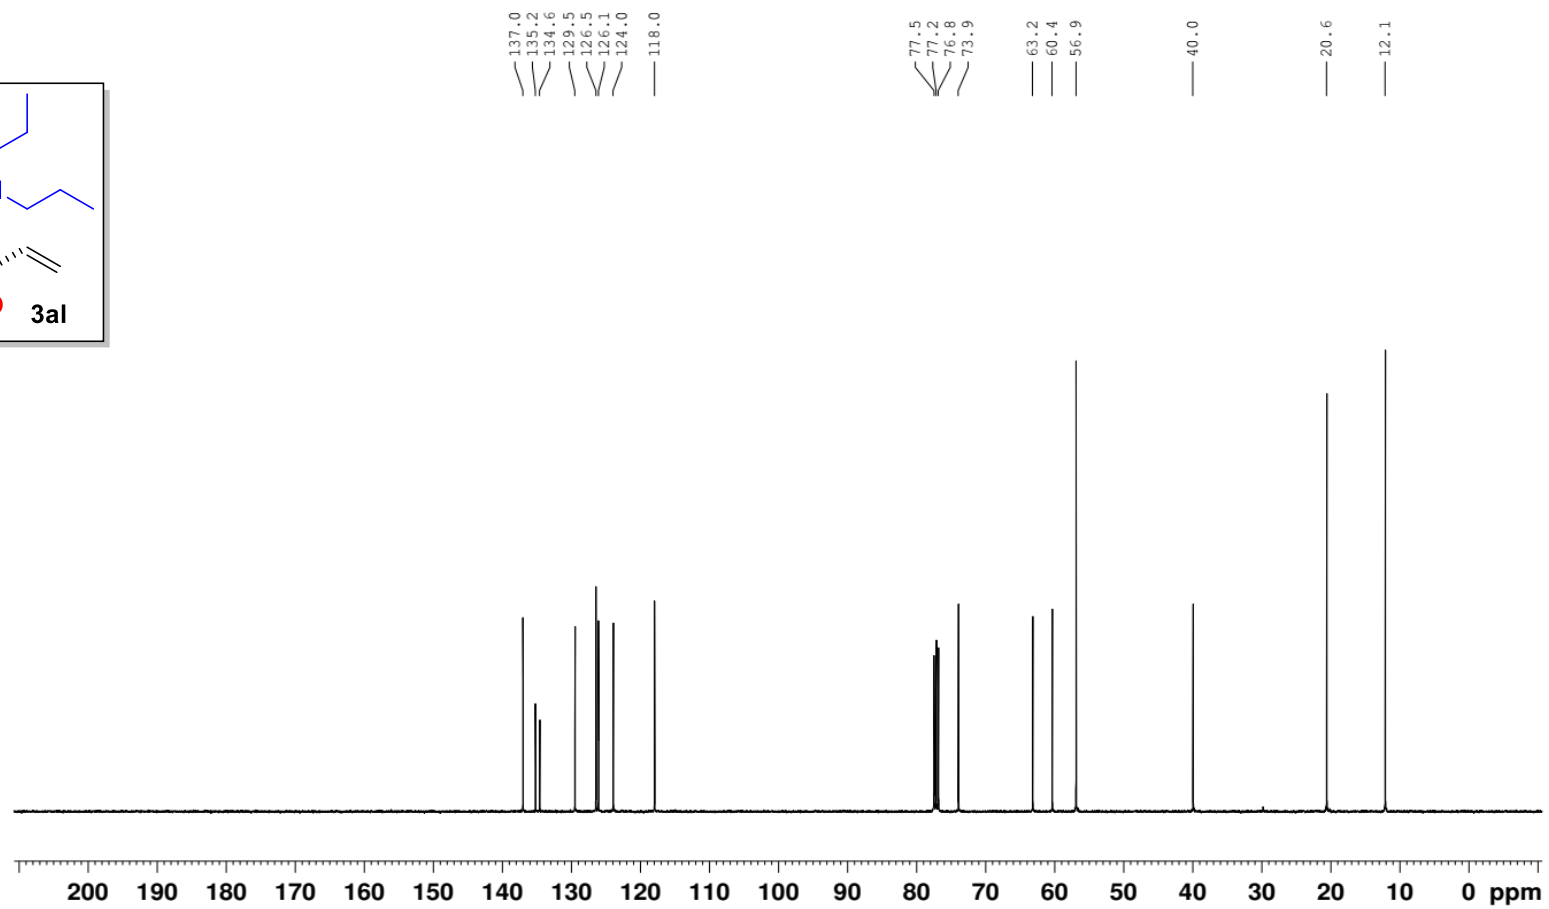

hy-P-3bb <sup>1</sup>H NMR (400MHz CDCl<sub>3</sub>)

hy-diene-p-ch3-h--

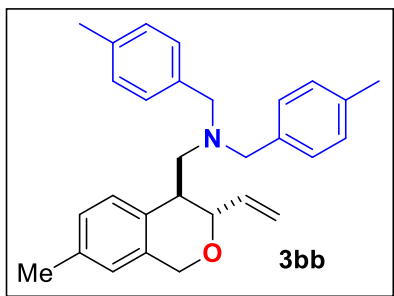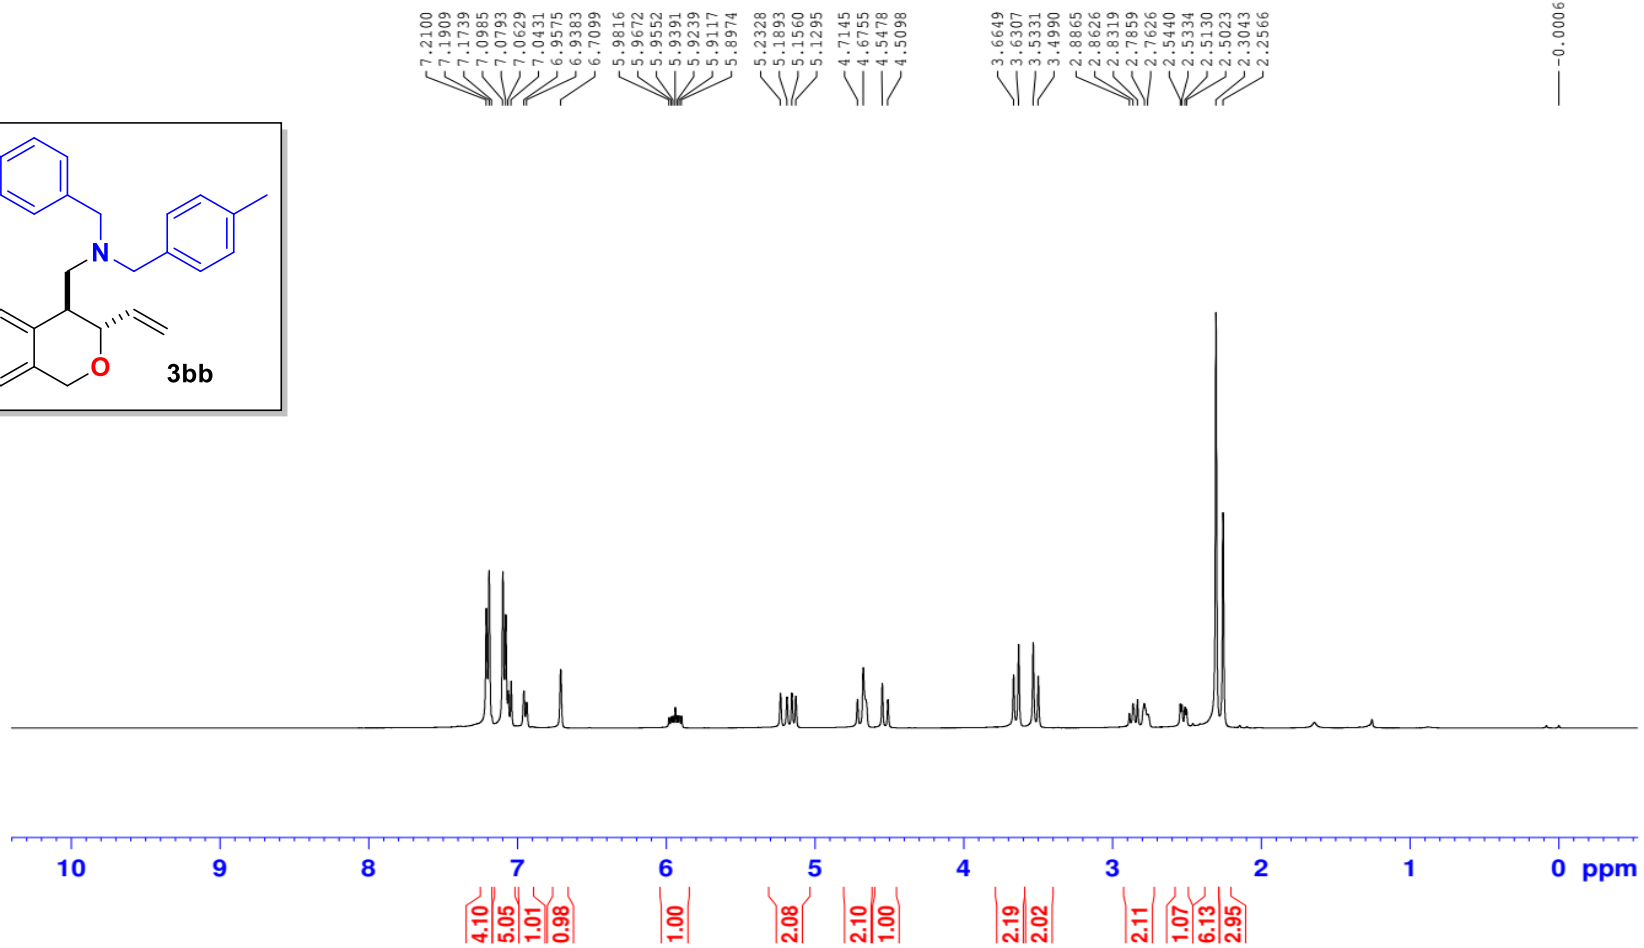



hy-P-3bb <sup>13</sup>C NMR (100MHz CDCl<sub>3</sub>)

hy-diene-p-ch3-c-

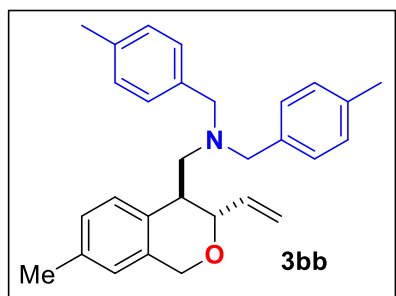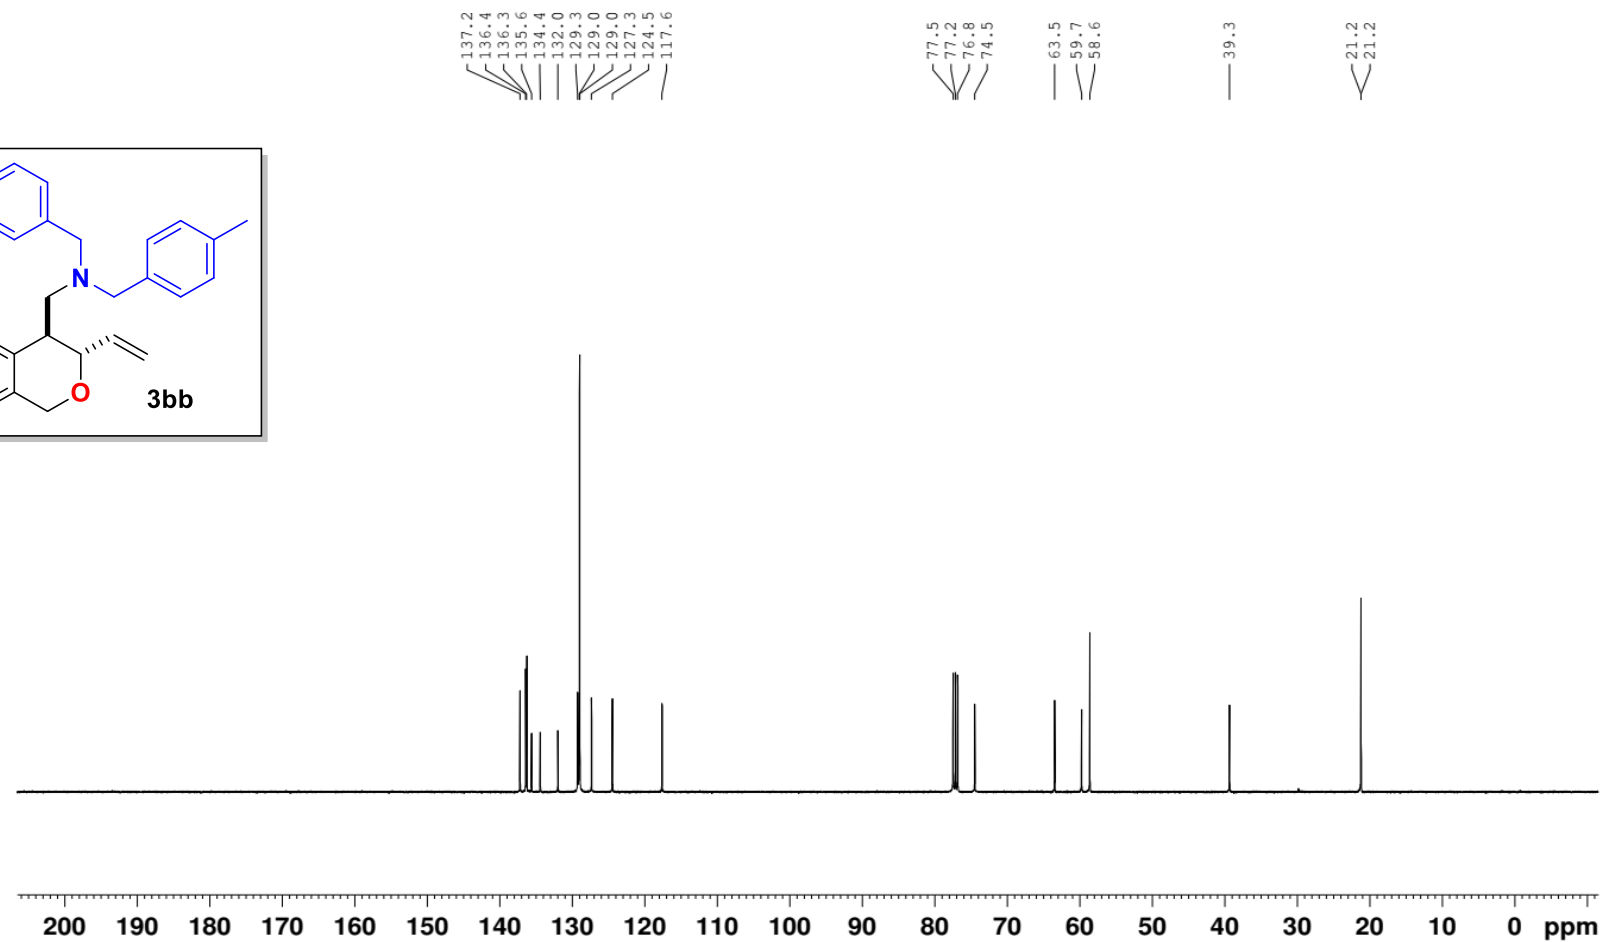

hy-P-3cb <sup>1</sup>H NMR (400MHz CDCl<sub>3</sub>)

hy-diene-4-ome-h-

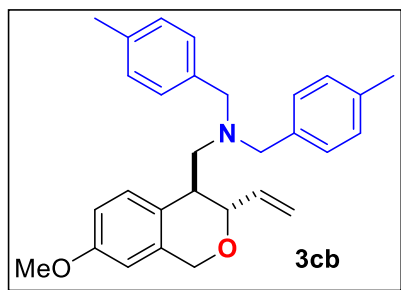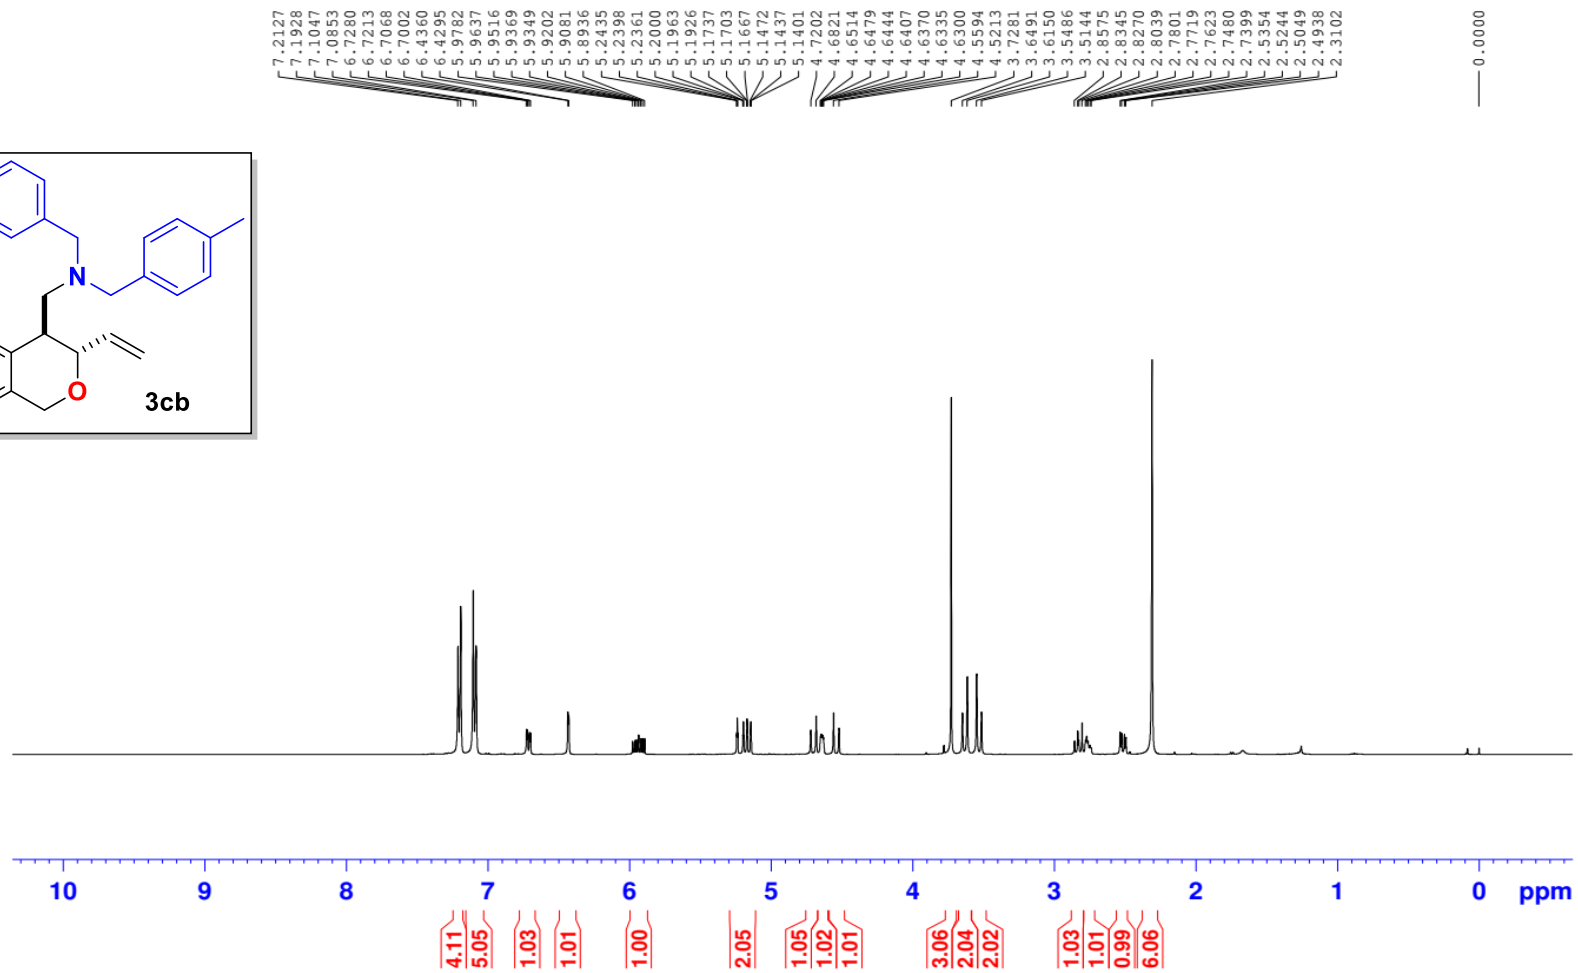

hy-P-3cb <sup>13</sup>C NMR (100MHz CDCl<sub>3</sub>)

hy-diene-4-ome-c-

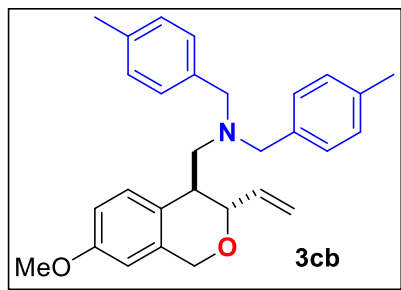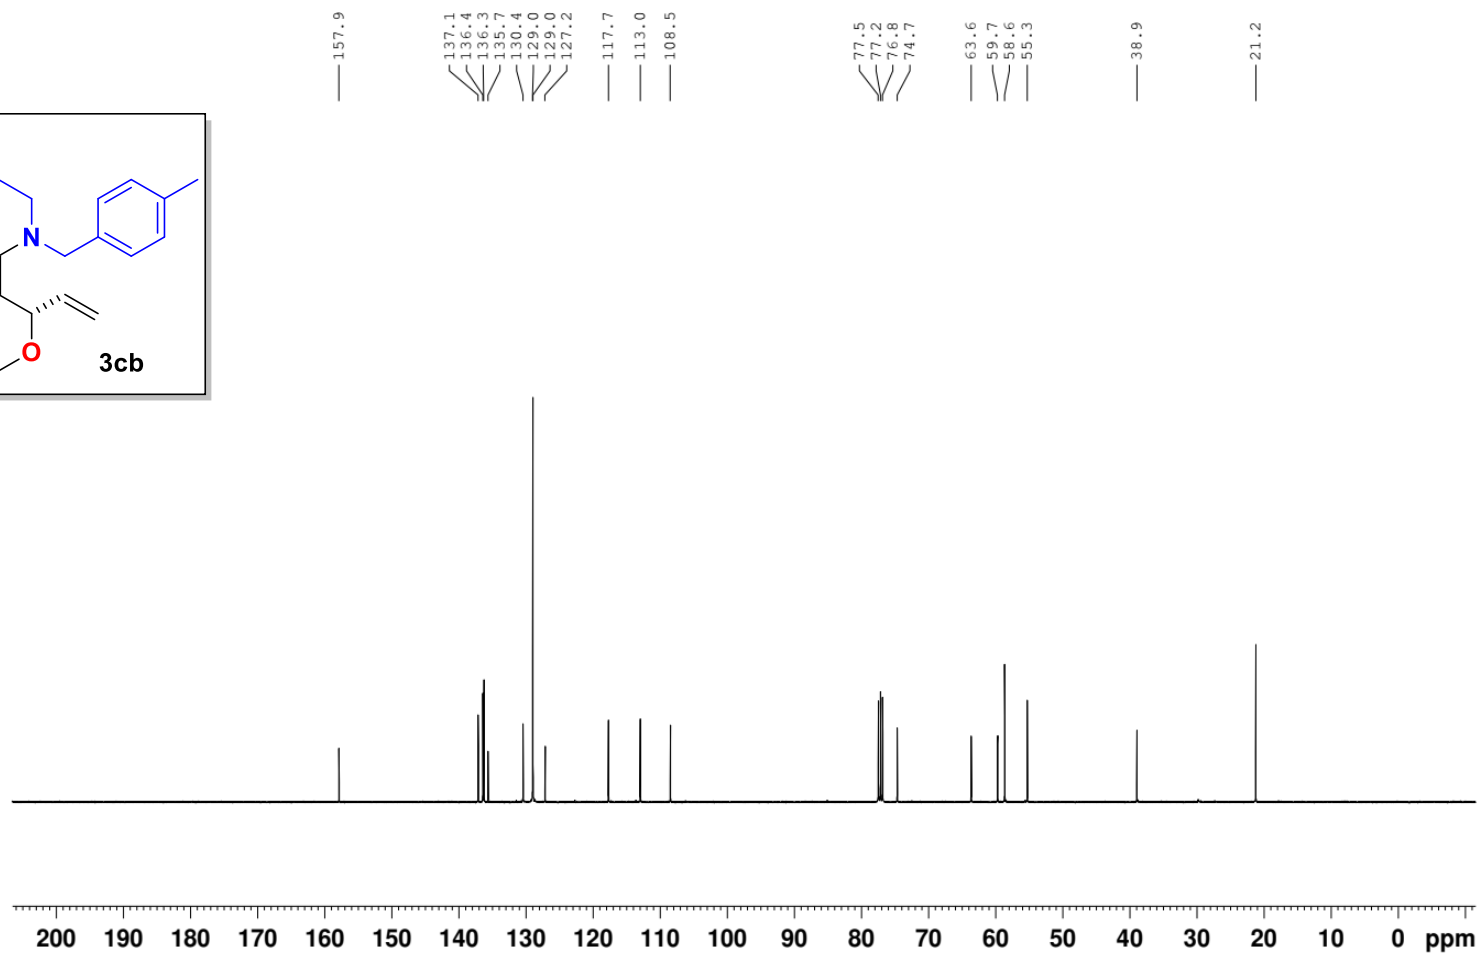

hy-P-3db <sup>1</sup>H NMR (400MHz CDCl<sub>3</sub>)

hy-diene-5-ome-h-

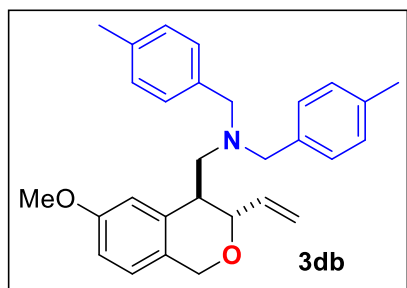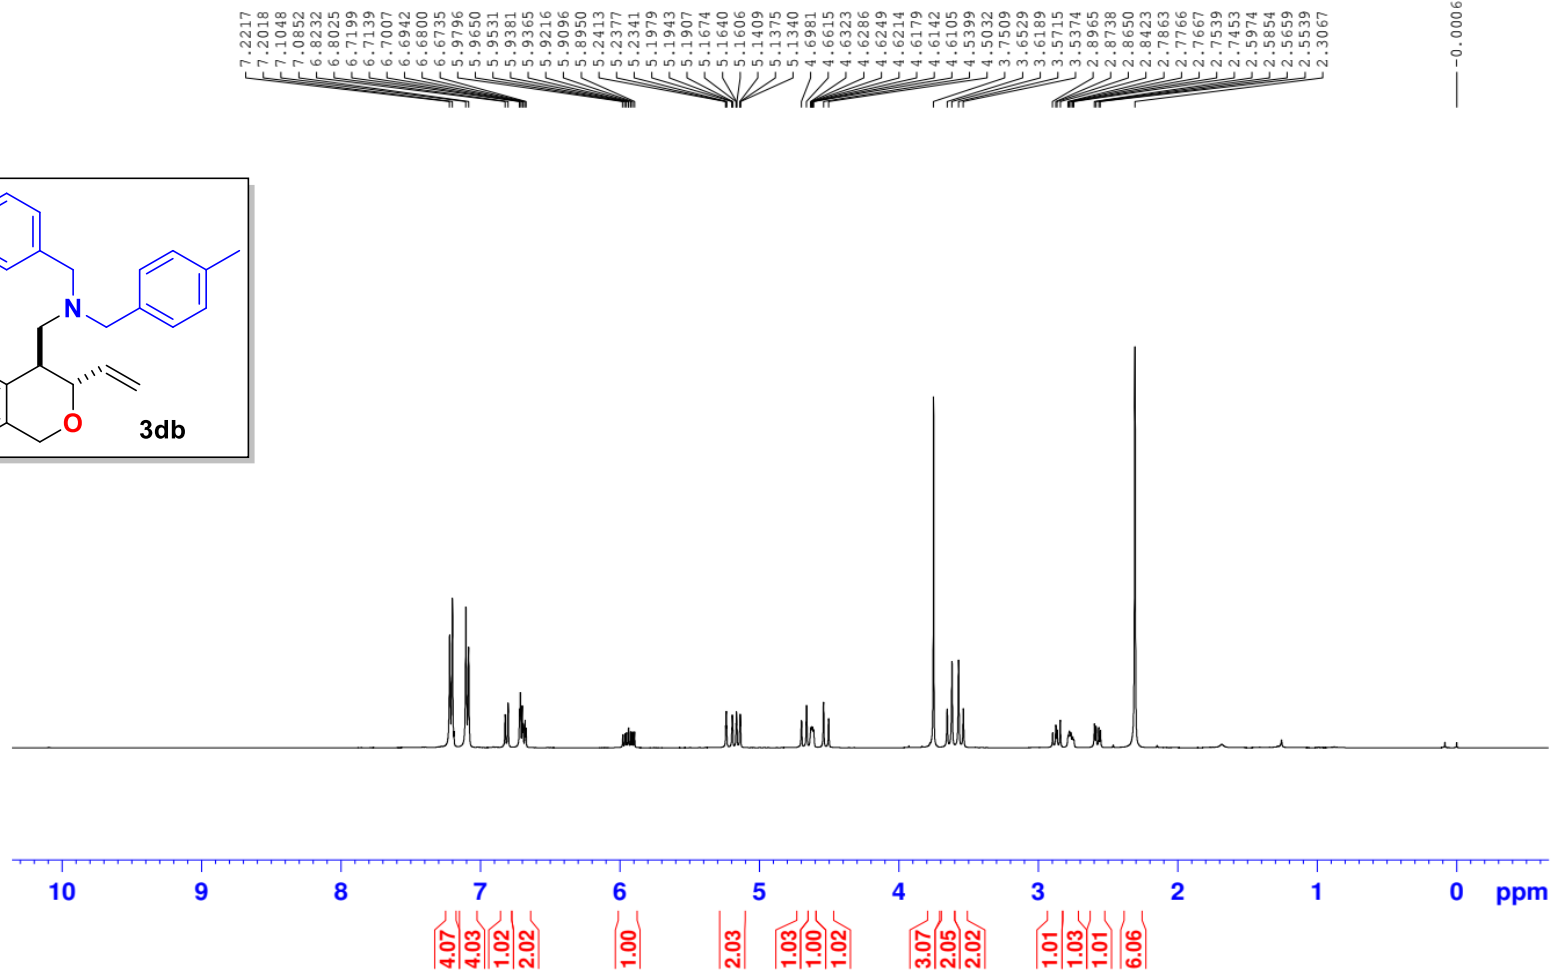

hy-P-3db <sup>13</sup>C NMR (100MHz CDCl<sub>3</sub>)

hy-diene-5-ome-c-

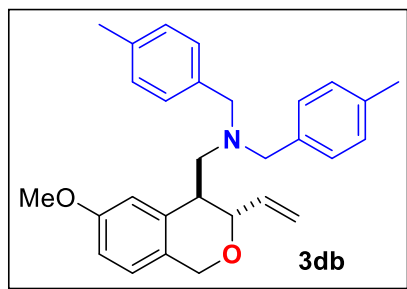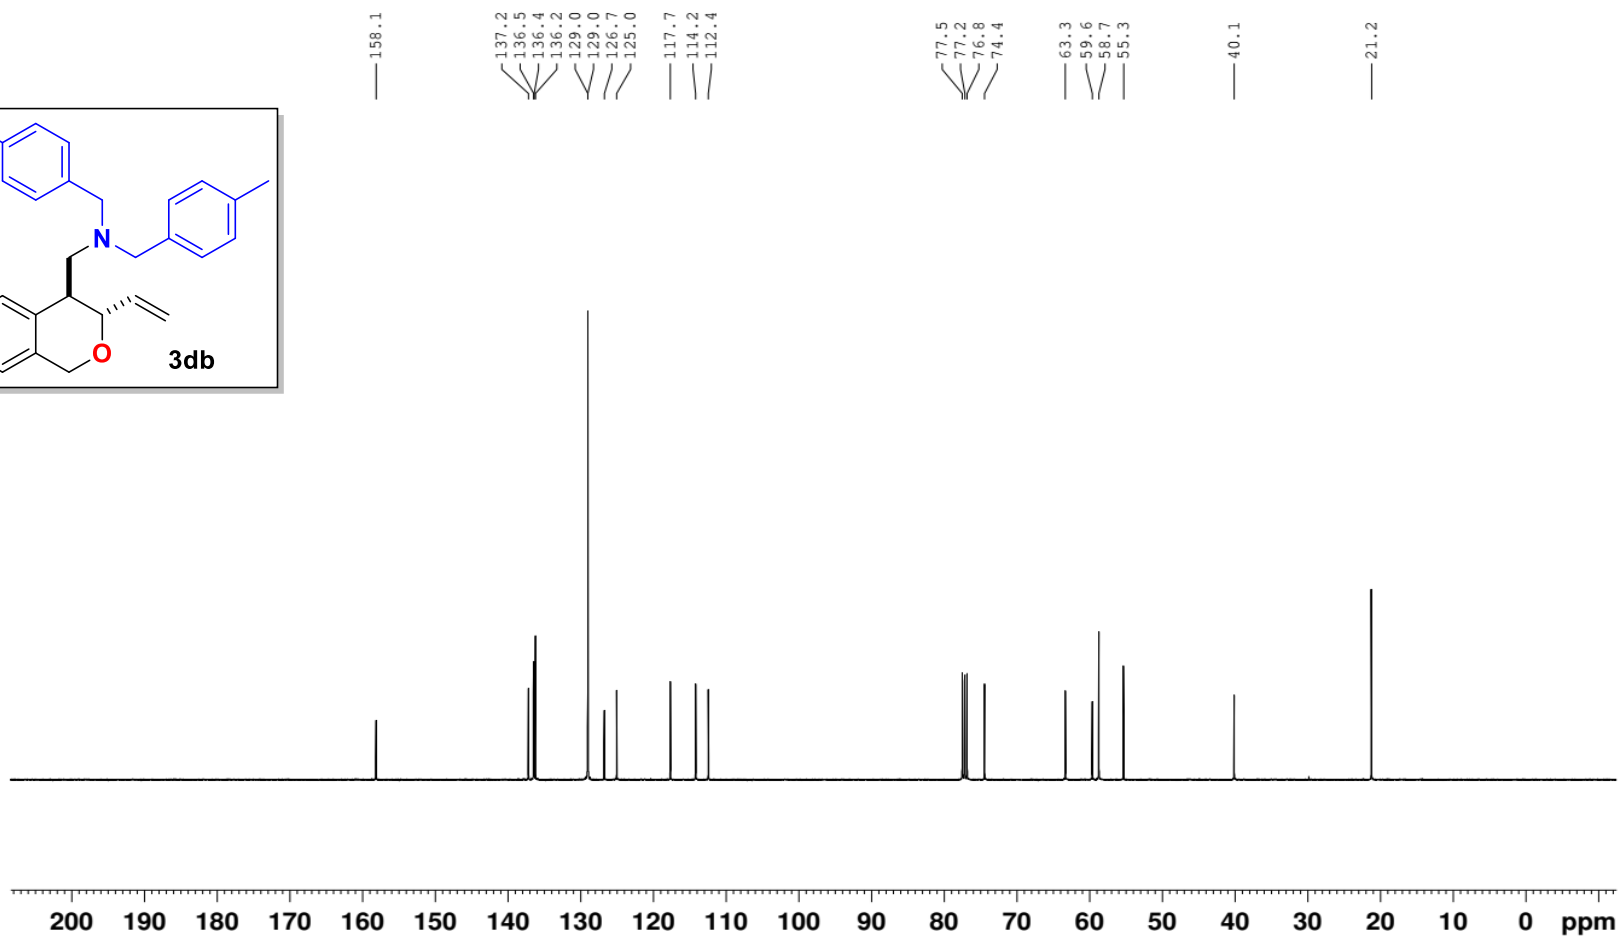

hy-P-3eb <sup>1</sup>H NMR (400MHz CDCl<sub>3</sub>)

hy-diene-5-otbs-h-

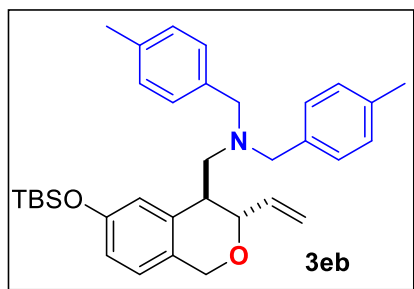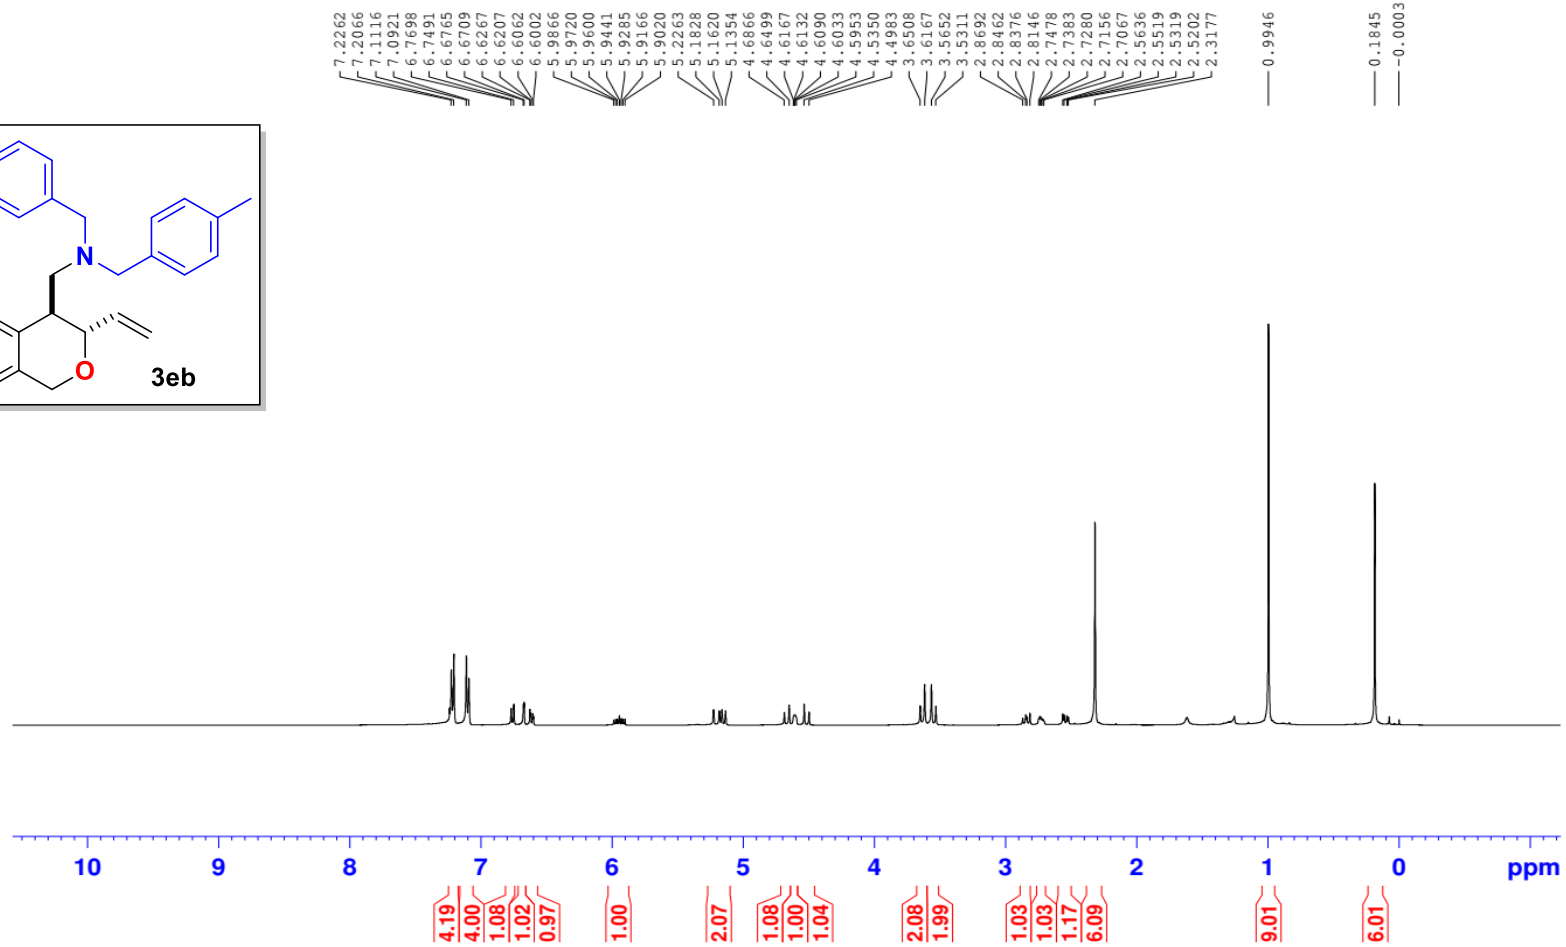

hy-P-3eb <sup>13</sup>C NMR (100MHz CDCl<sub>3</sub>)

hy-diene-5-otbs-c-

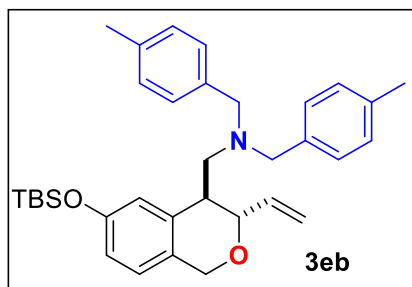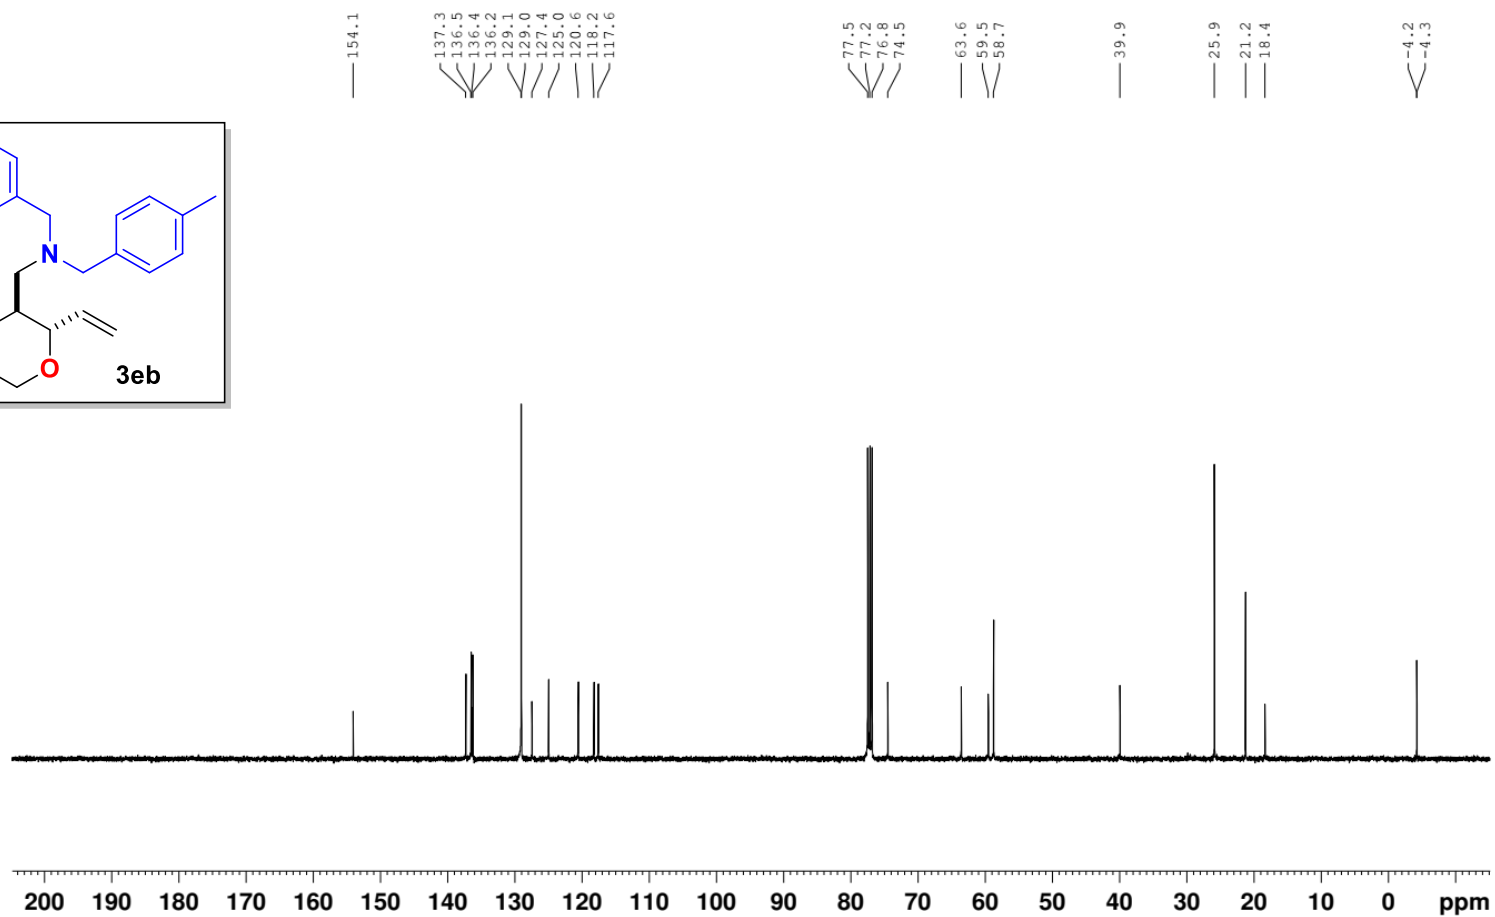

hy-P-3fb <sup>1</sup>H NMR (400MHz CDCl<sub>3</sub>)

hy-diene-4,5-ome-h--

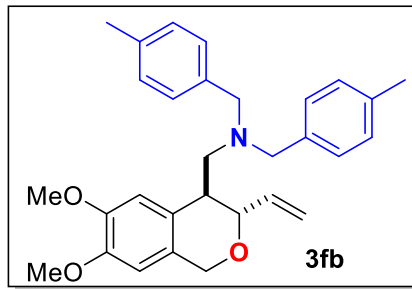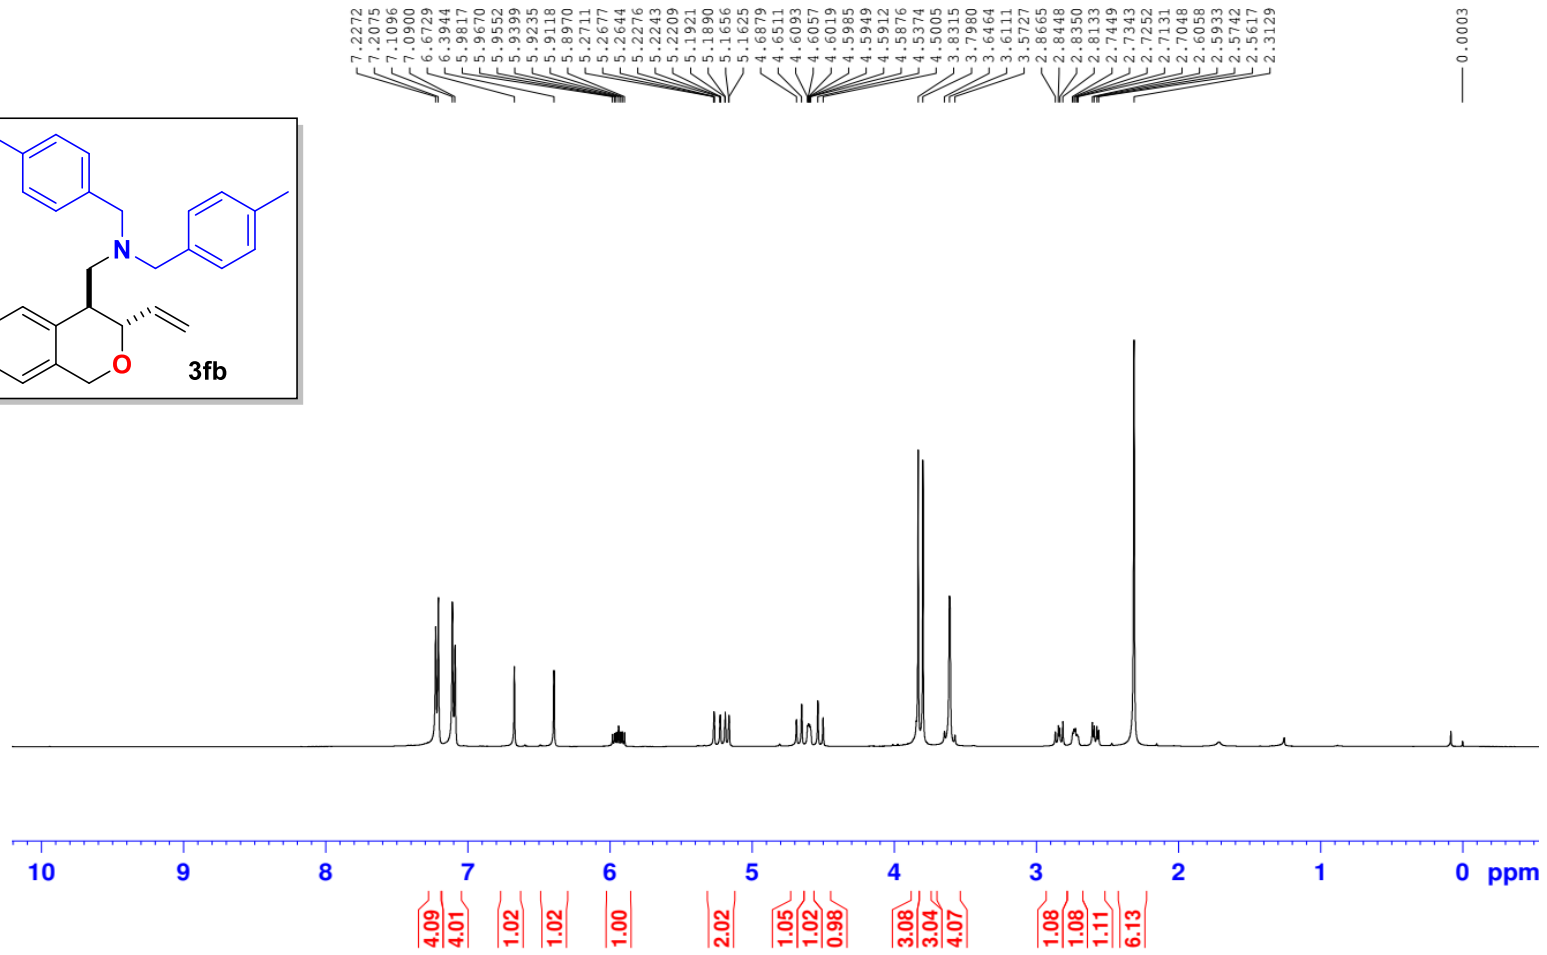



hy-P-3fb <sup>13</sup>C NMR (100MHz CDCl<sub>3</sub>)

hy-diene-4,5-ome-c-

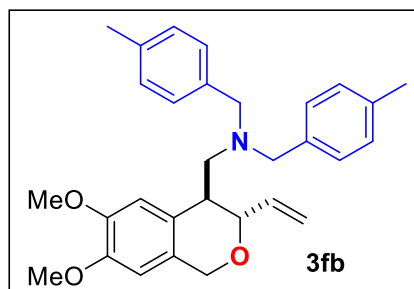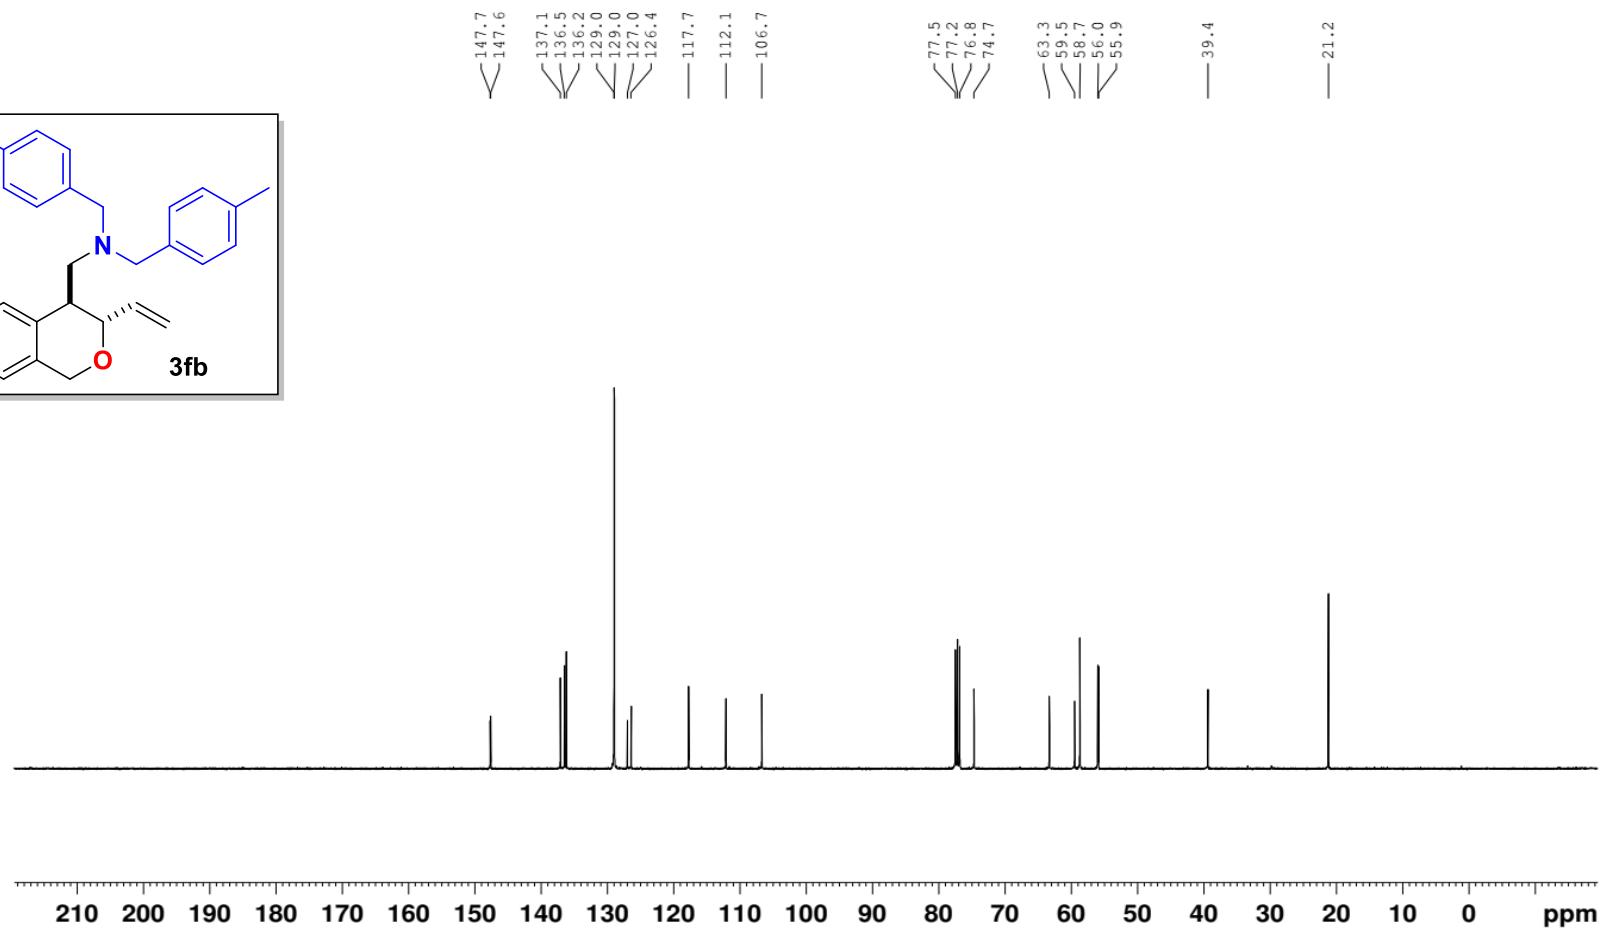

hy-P-3gb <sup>1</sup>H NMR (400MHz CDCl<sub>3</sub>)

hy-diene-p-f-h--

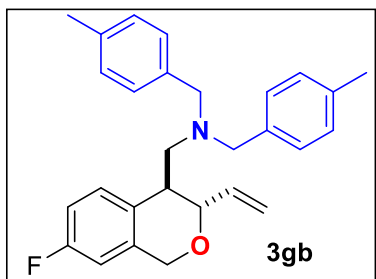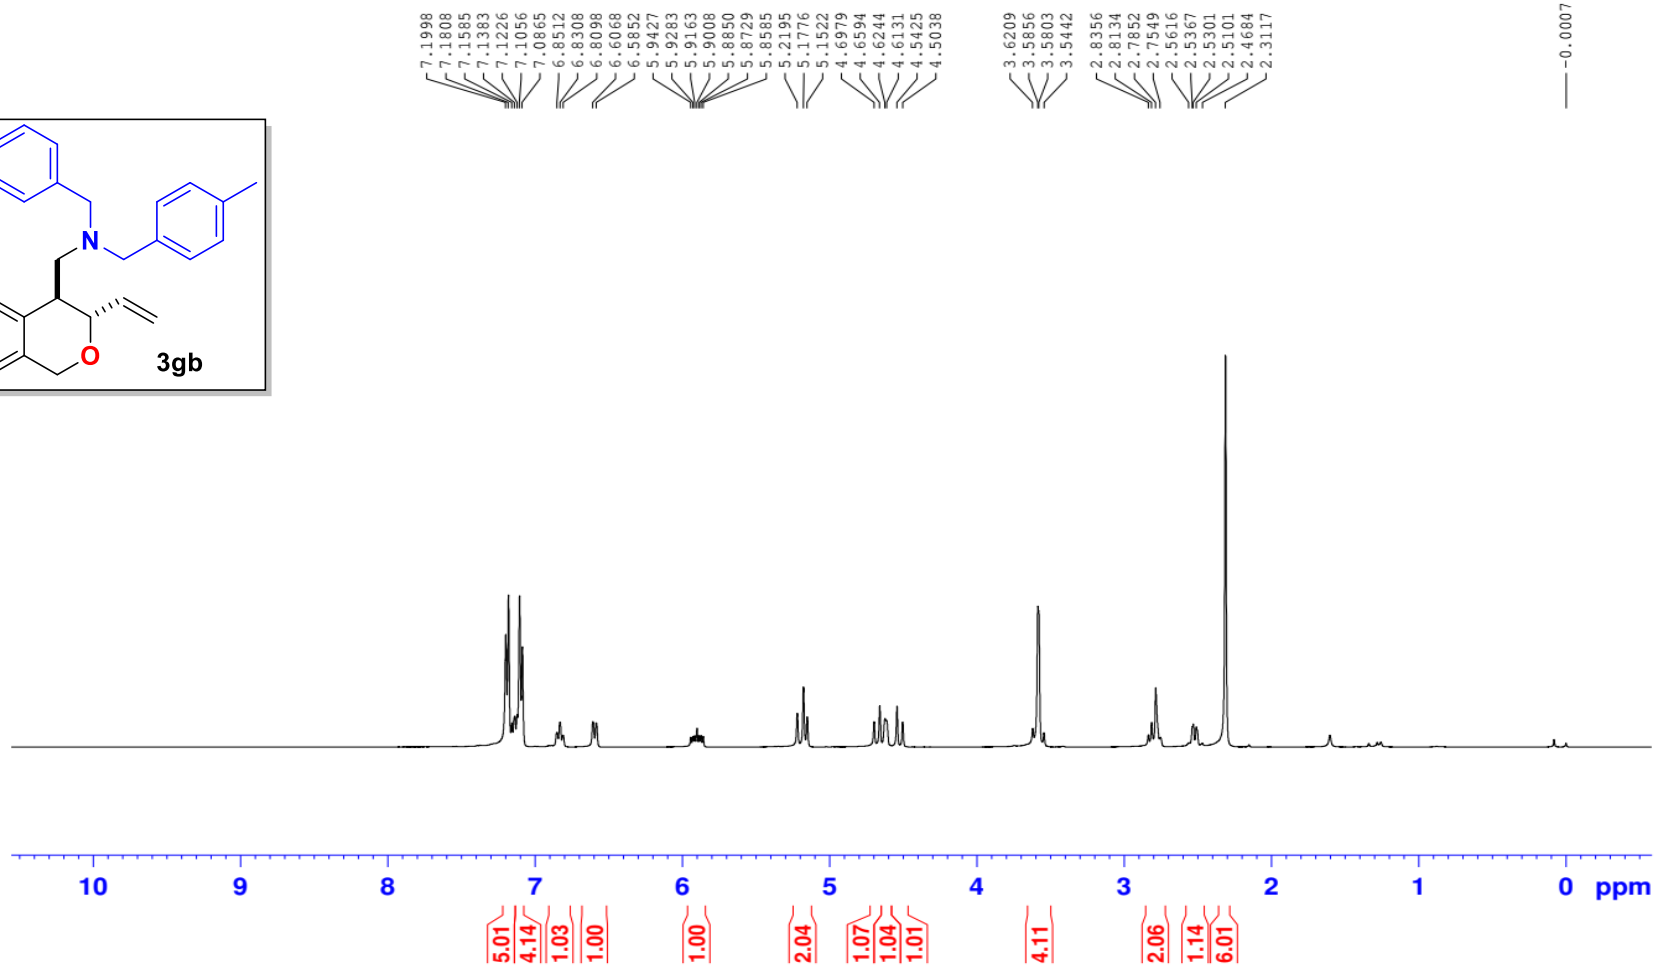

hy-P-3gb <sup>13</sup>C NMR (100MHz CDCl<sub>3</sub>)

hy-diene-p-f-c--

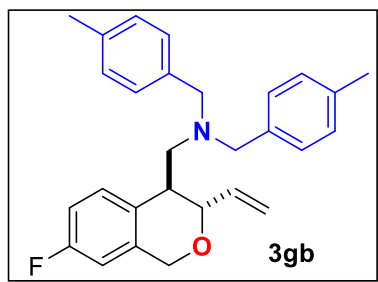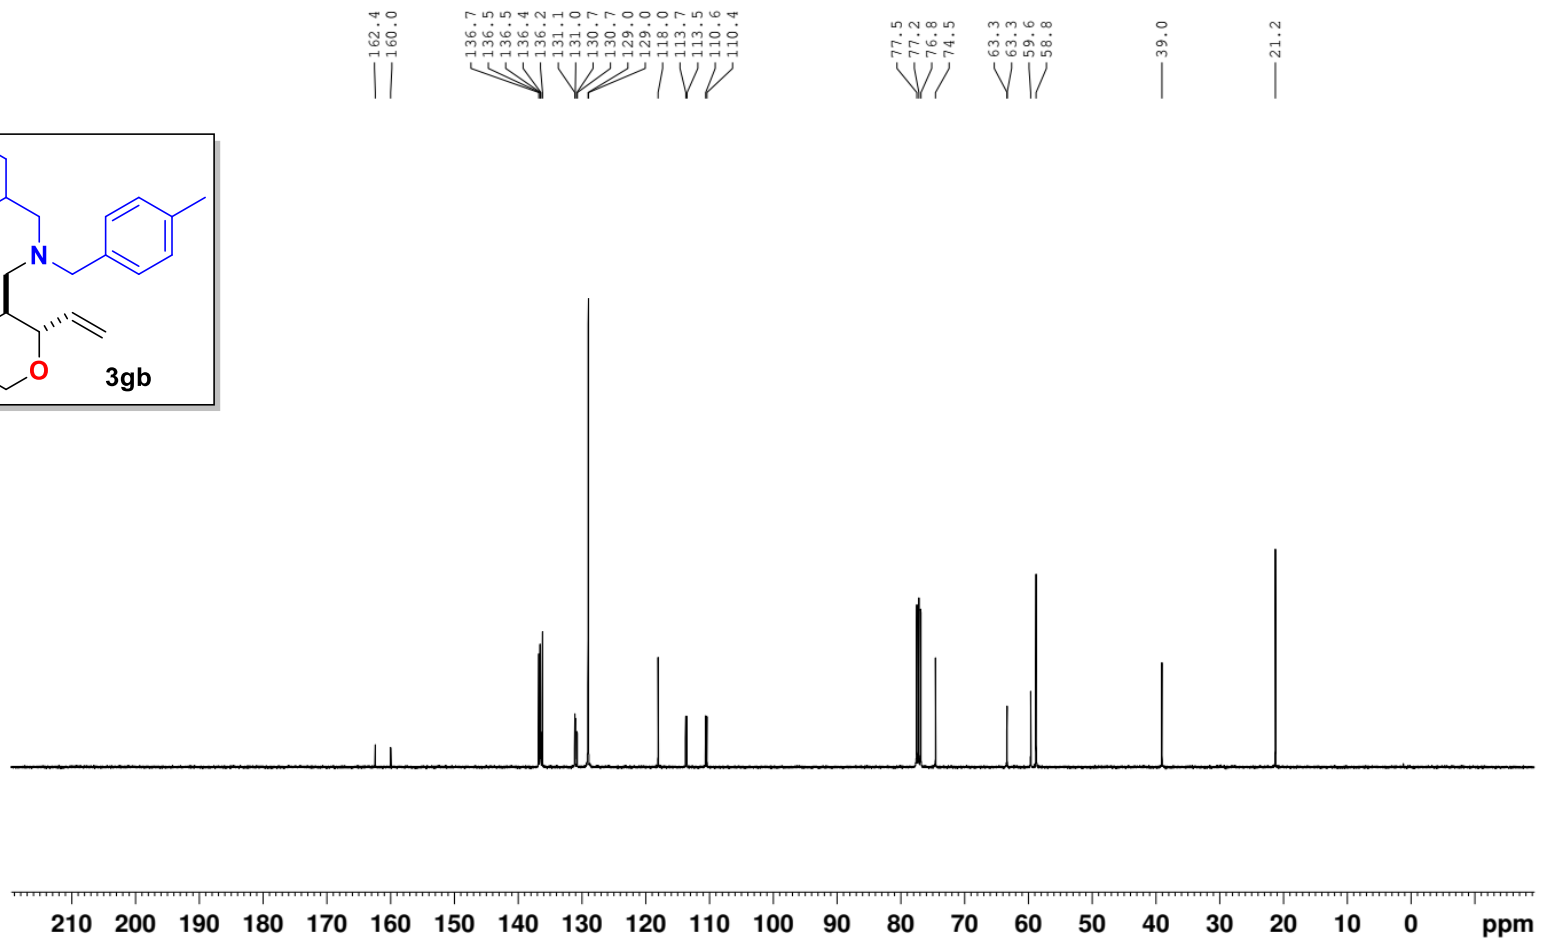

hy-P-3gb <sup>19</sup>F NMR (376MHz CDCl<sub>3</sub>)

hy-diene-p-f-f

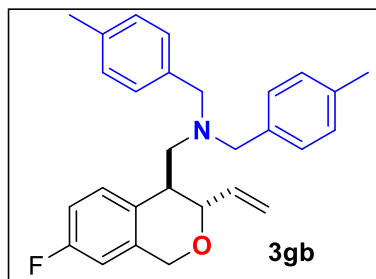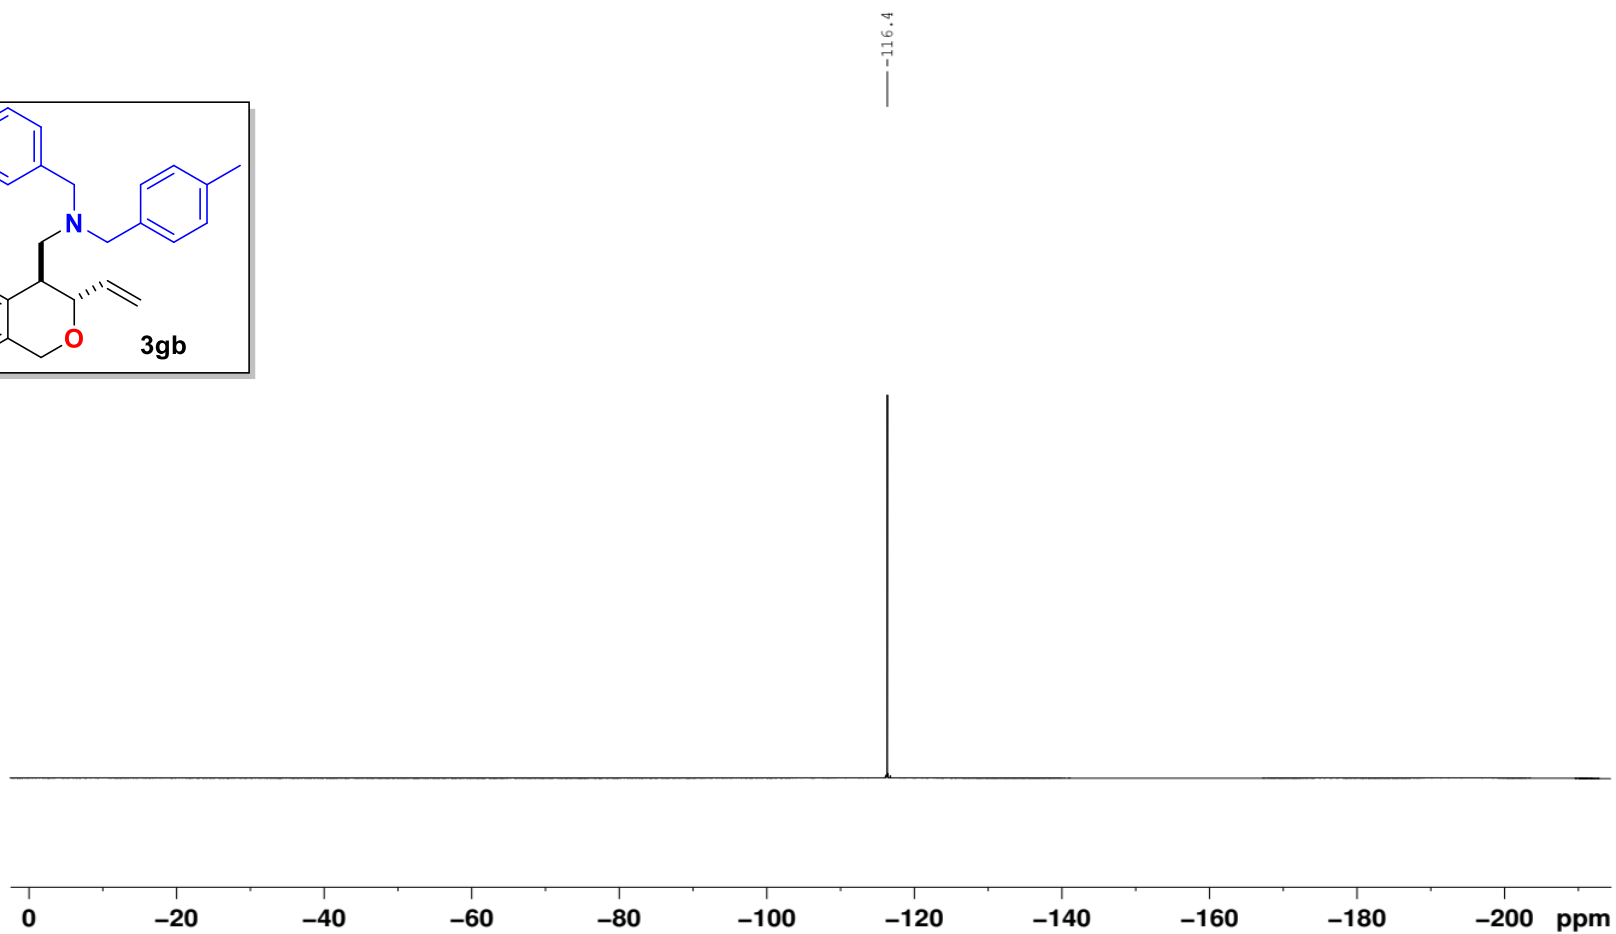

hy-P-3hb <sup>1</sup>H NMR (400MHz CDCl<sub>3</sub>)

hy-diene-5-f-1

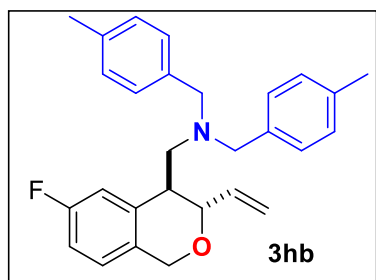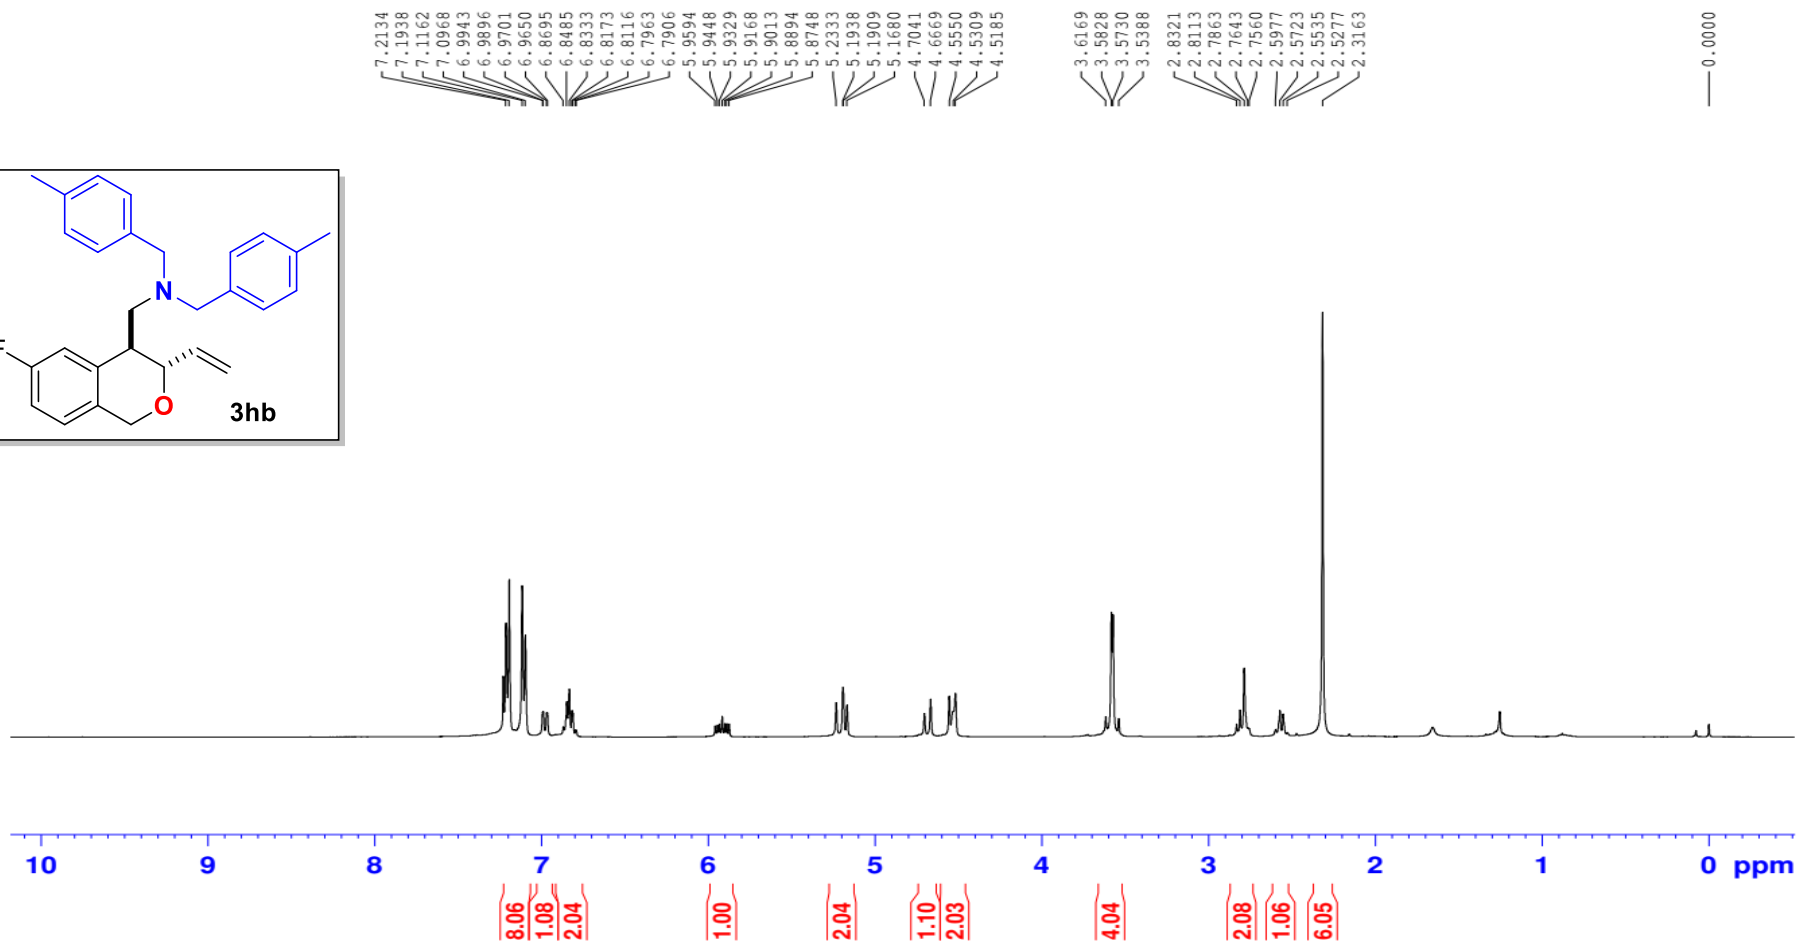

hy-P-3hb <sup>13</sup>C NMR (100MHz CDCl<sub>3</sub>)

hy-diene-5-f-c-

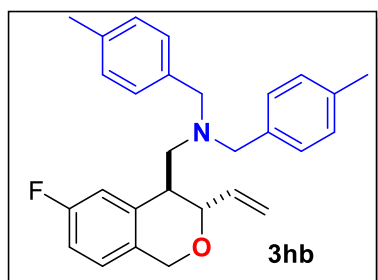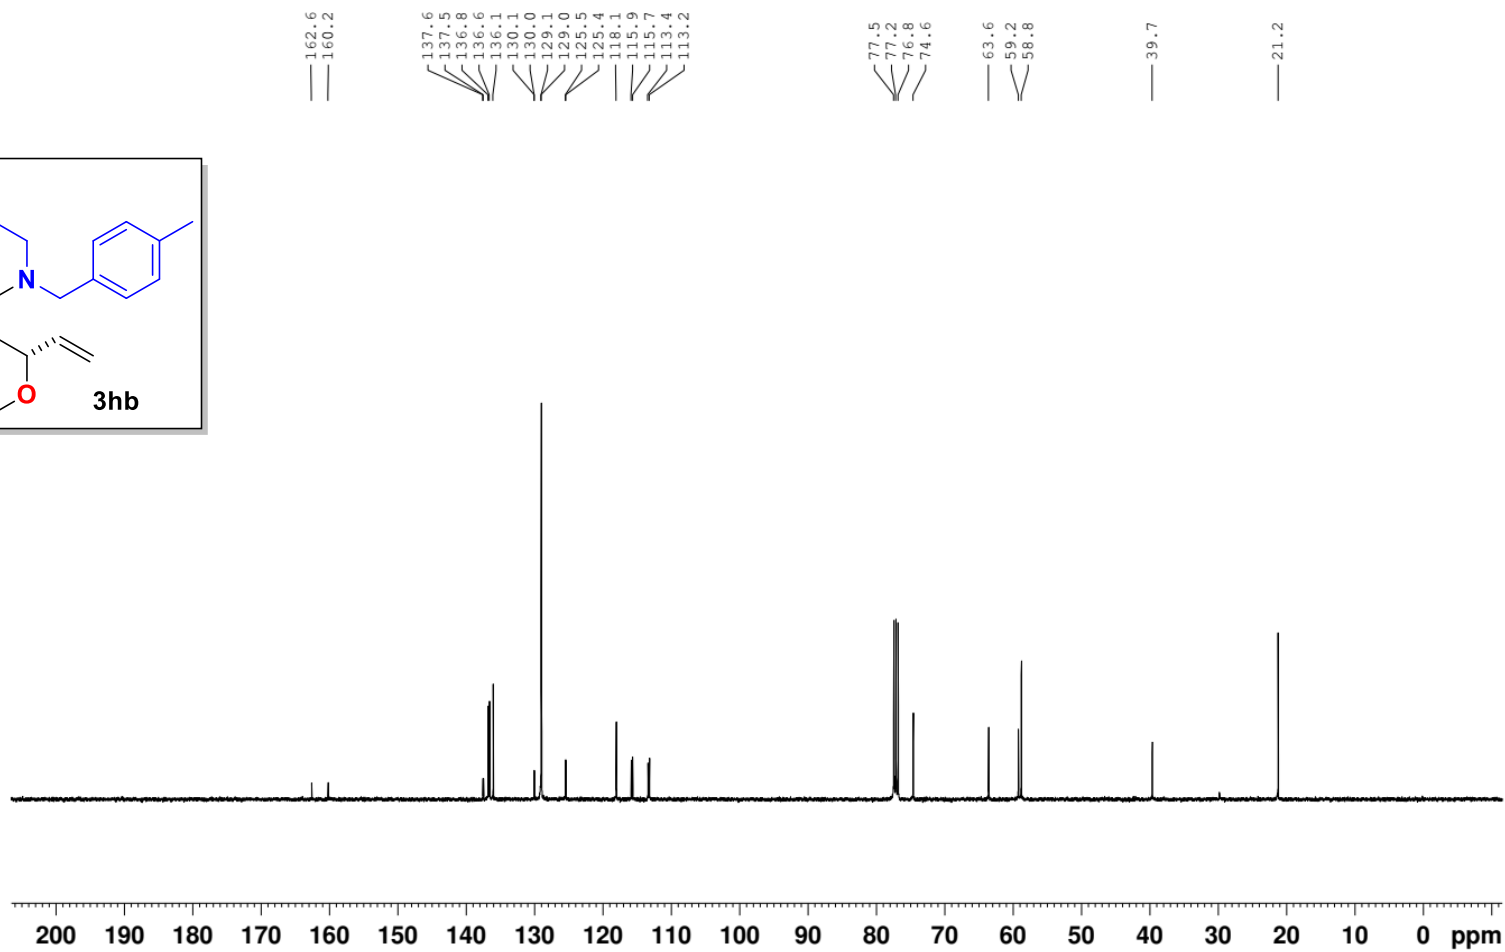



hy-diene-6-f-h-

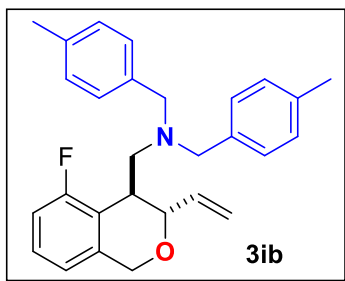

hy-P-**3ib** <sup>1</sup>H NMR (400MHz CDCl<sub>3</sub>)

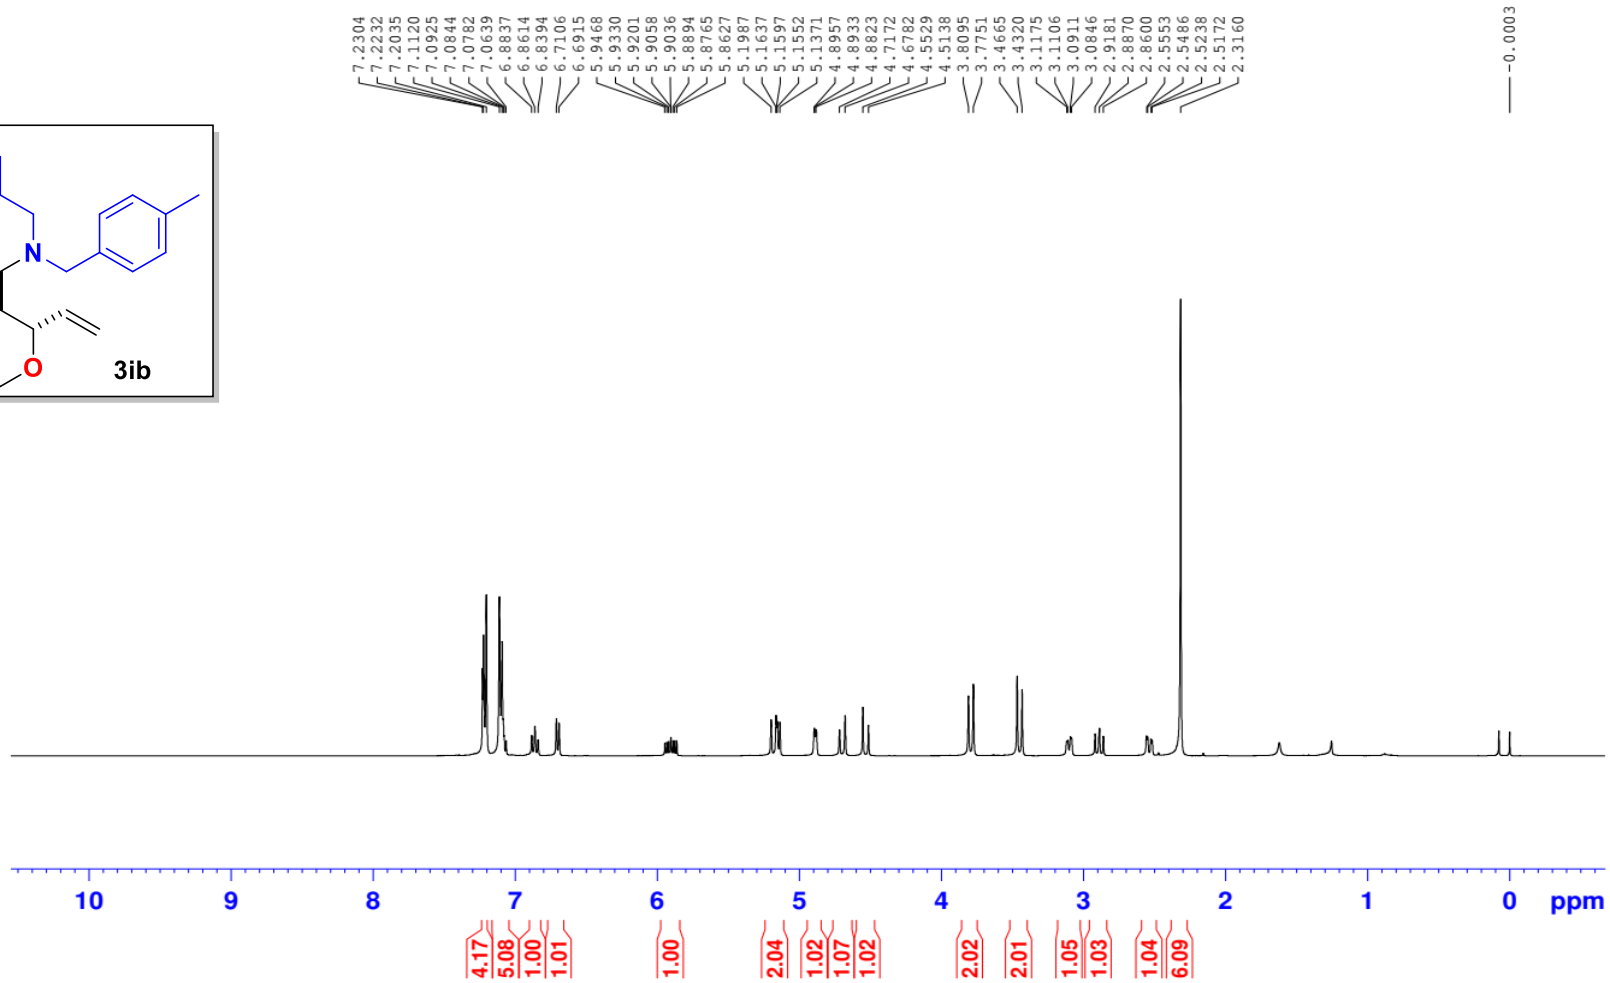



hy-P-3ib <sup>13</sup>C NMR (100MHz CDCl<sub>3</sub>)

hy-diene-6-f-c-

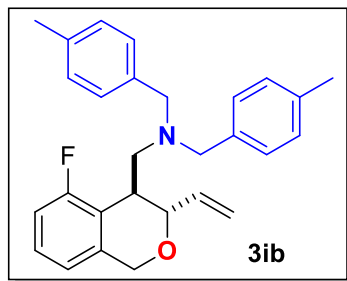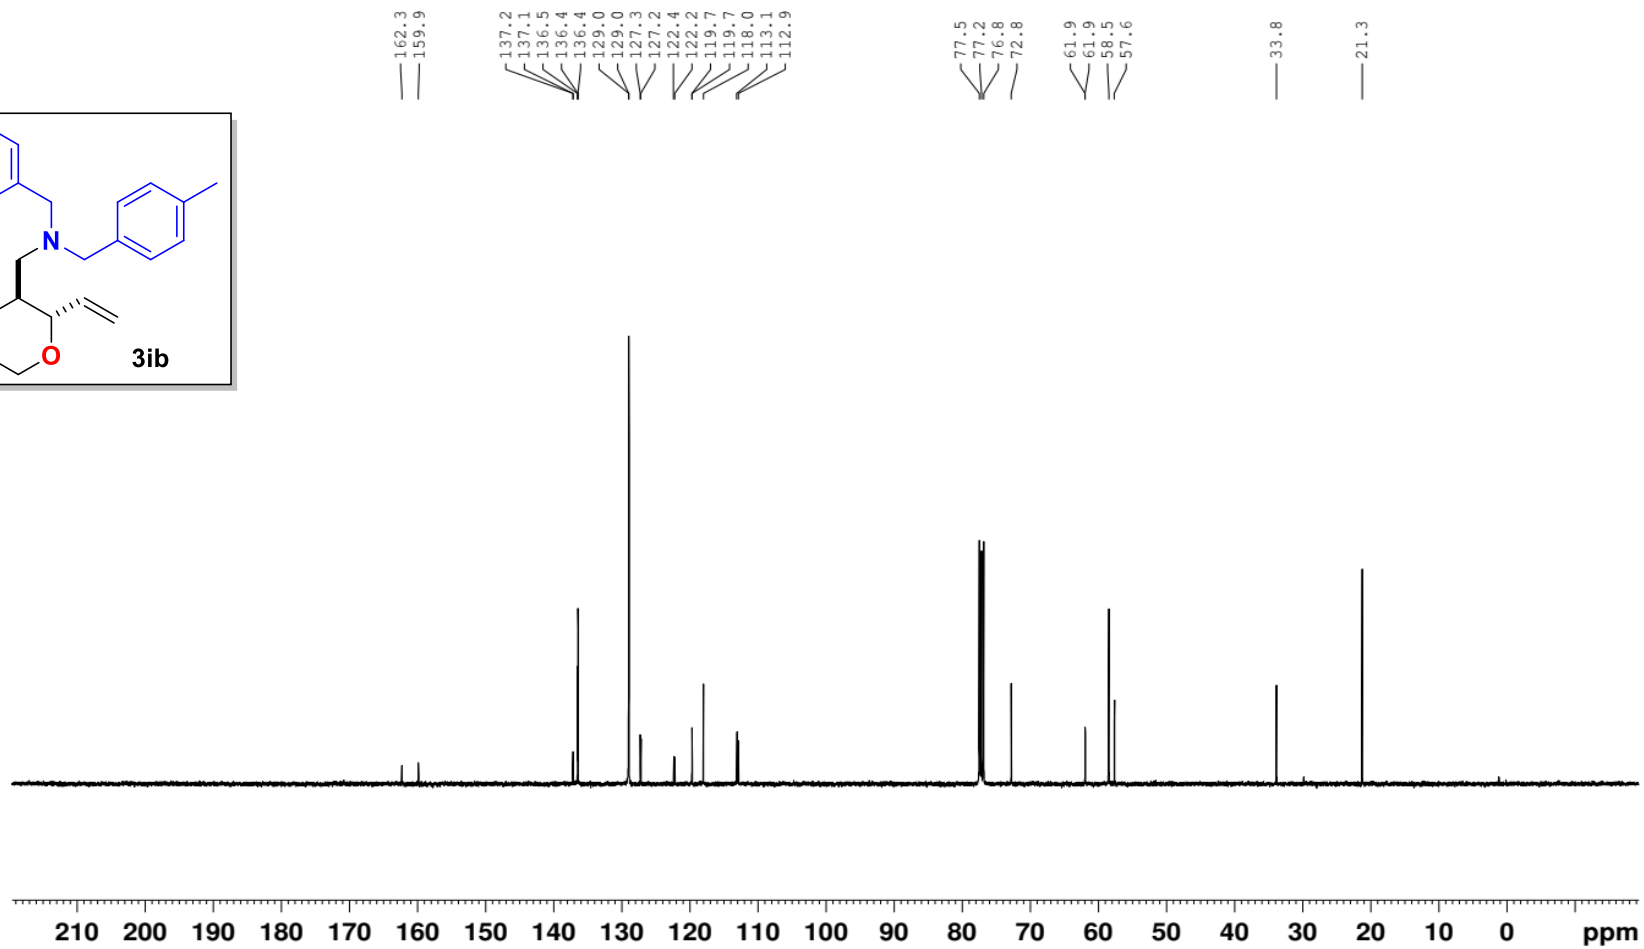

hy-P-**3ib**  $^{19}\text{F}$  NMR (376MHz  $\text{CDCl}_3$ )

hy-diene-6-f-f

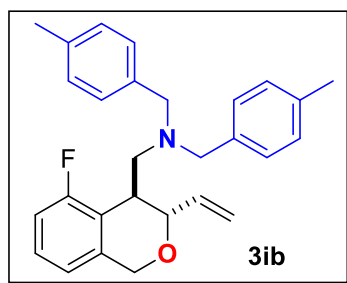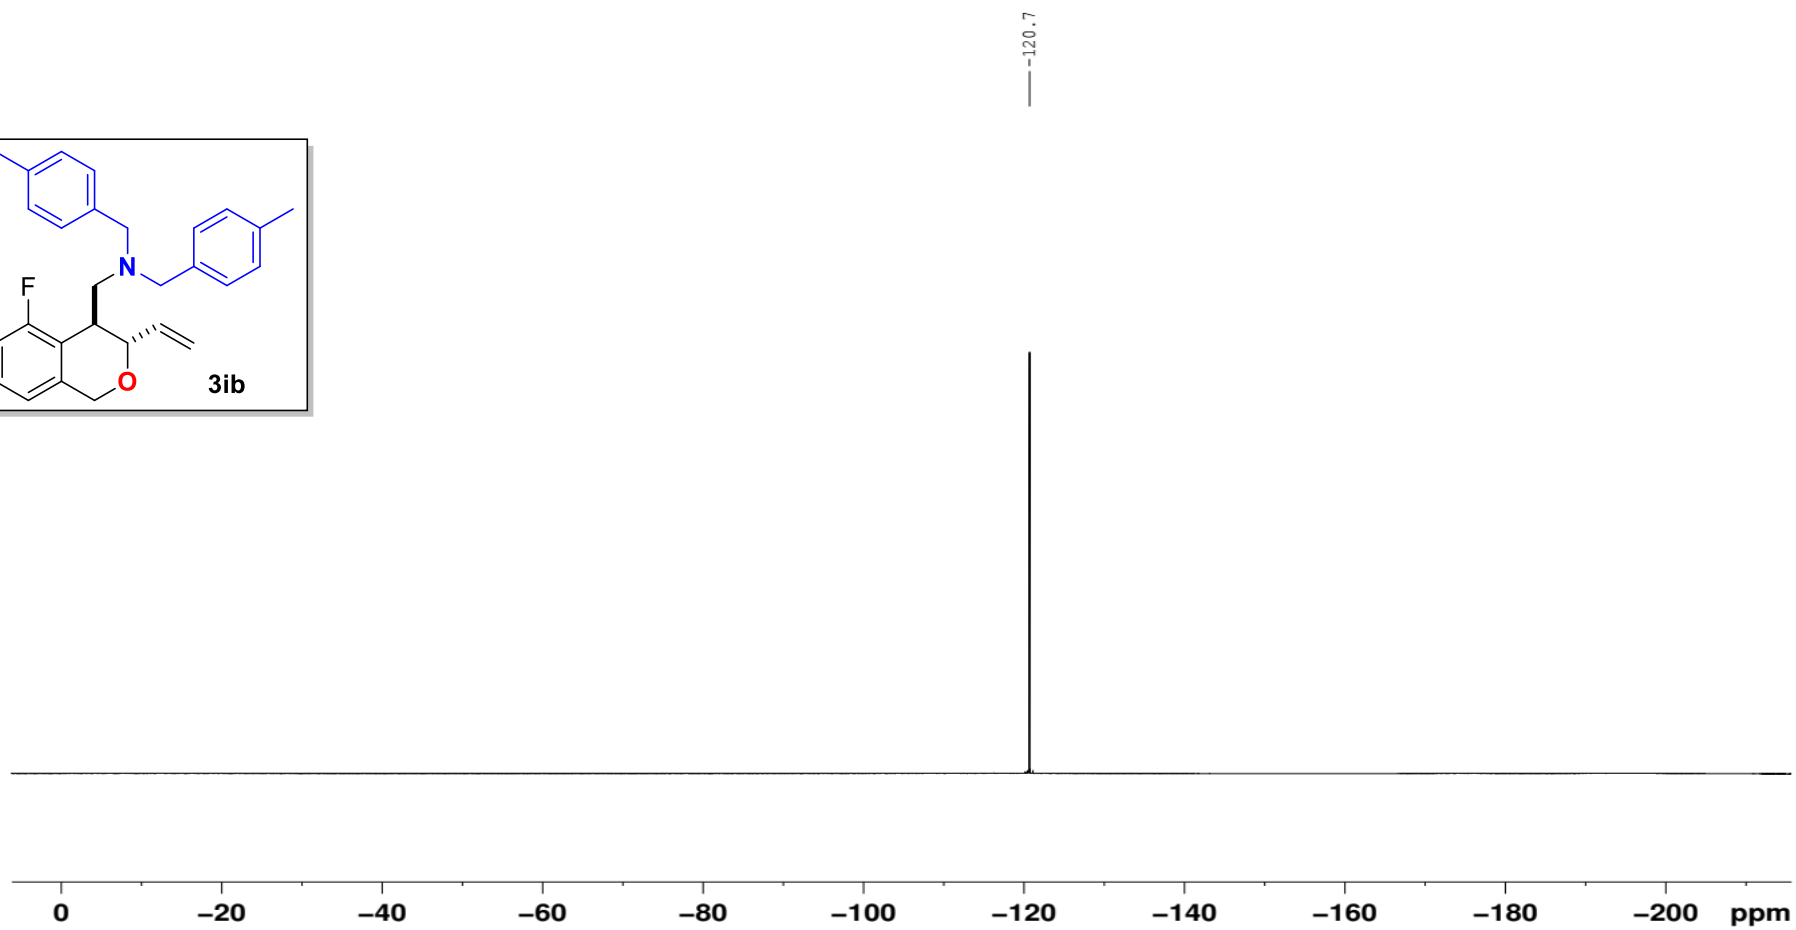

hy-diene-p-cl-h-

hy-P-3jb <sup>1</sup>H NMR (400MHz CDCl<sub>3</sub>)

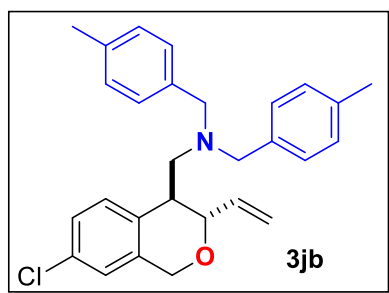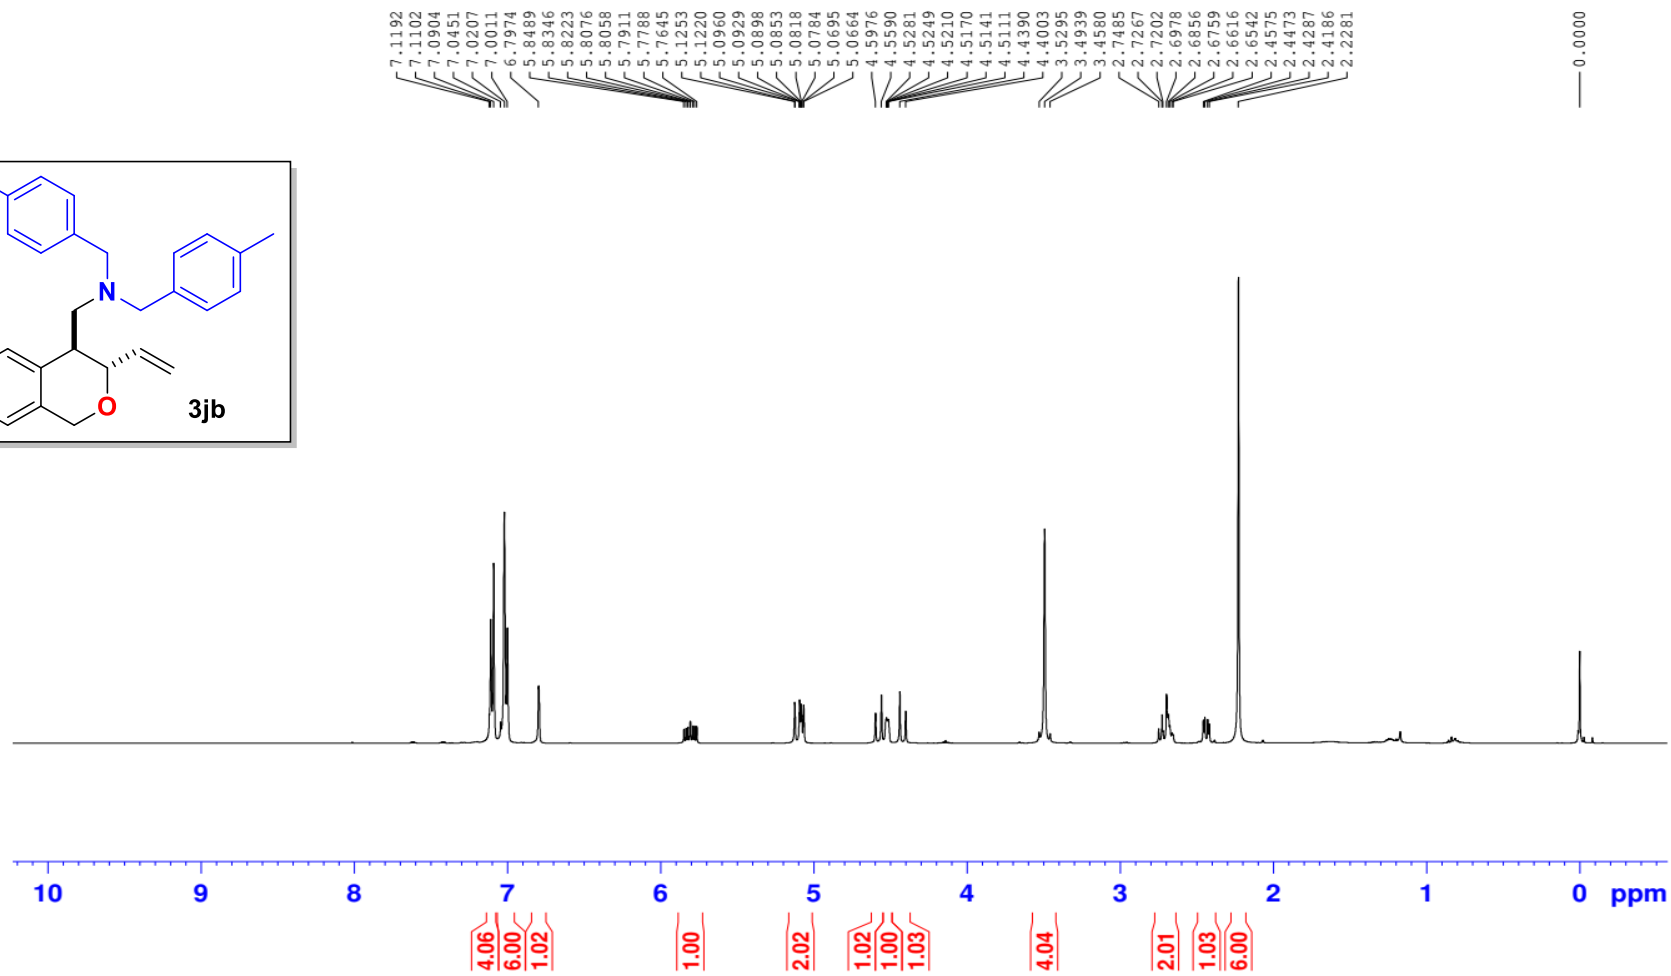

hy-P-3jb <sup>13</sup>C NMR (100MHz CDCl<sub>3</sub>)

hy-diene-p-cl-c-

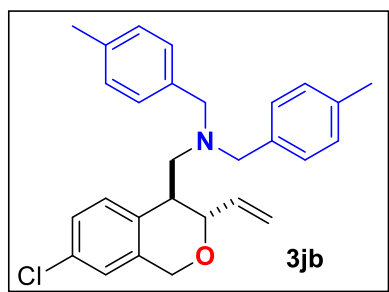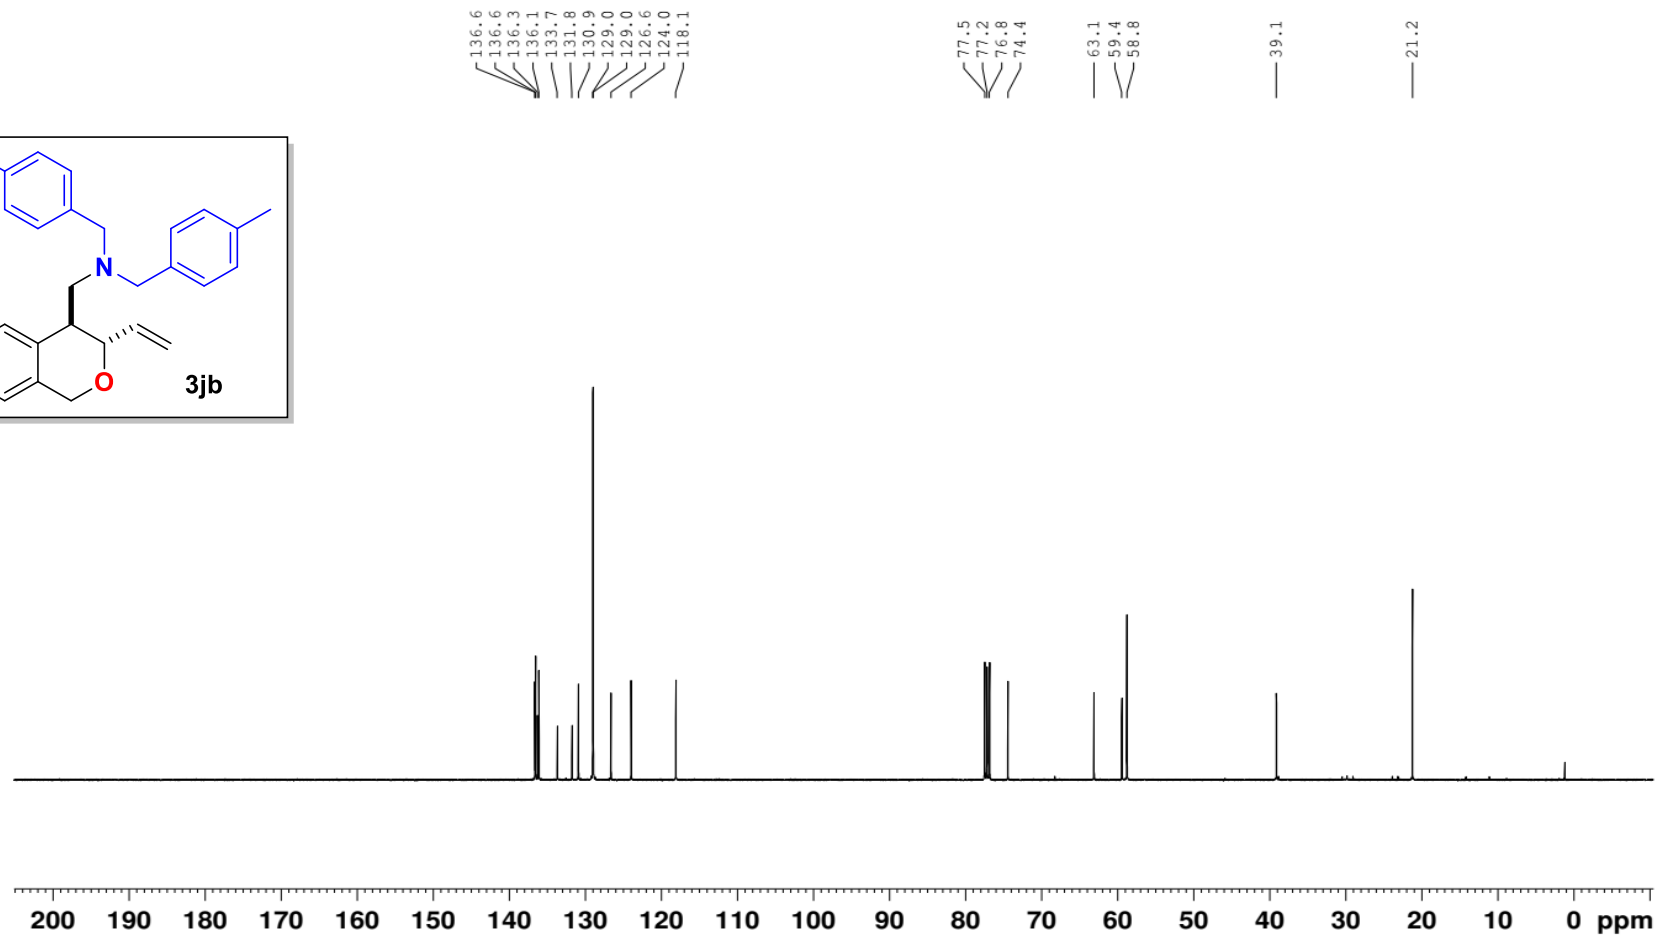

hy-P-3kb <sup>1</sup>H NMR (400MHz CDCl<sub>3</sub>)

hy-diene-5-cf3

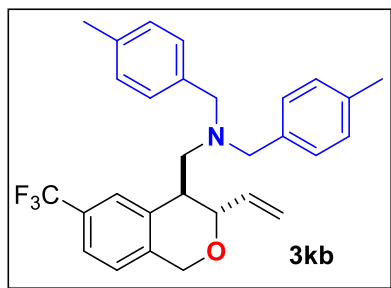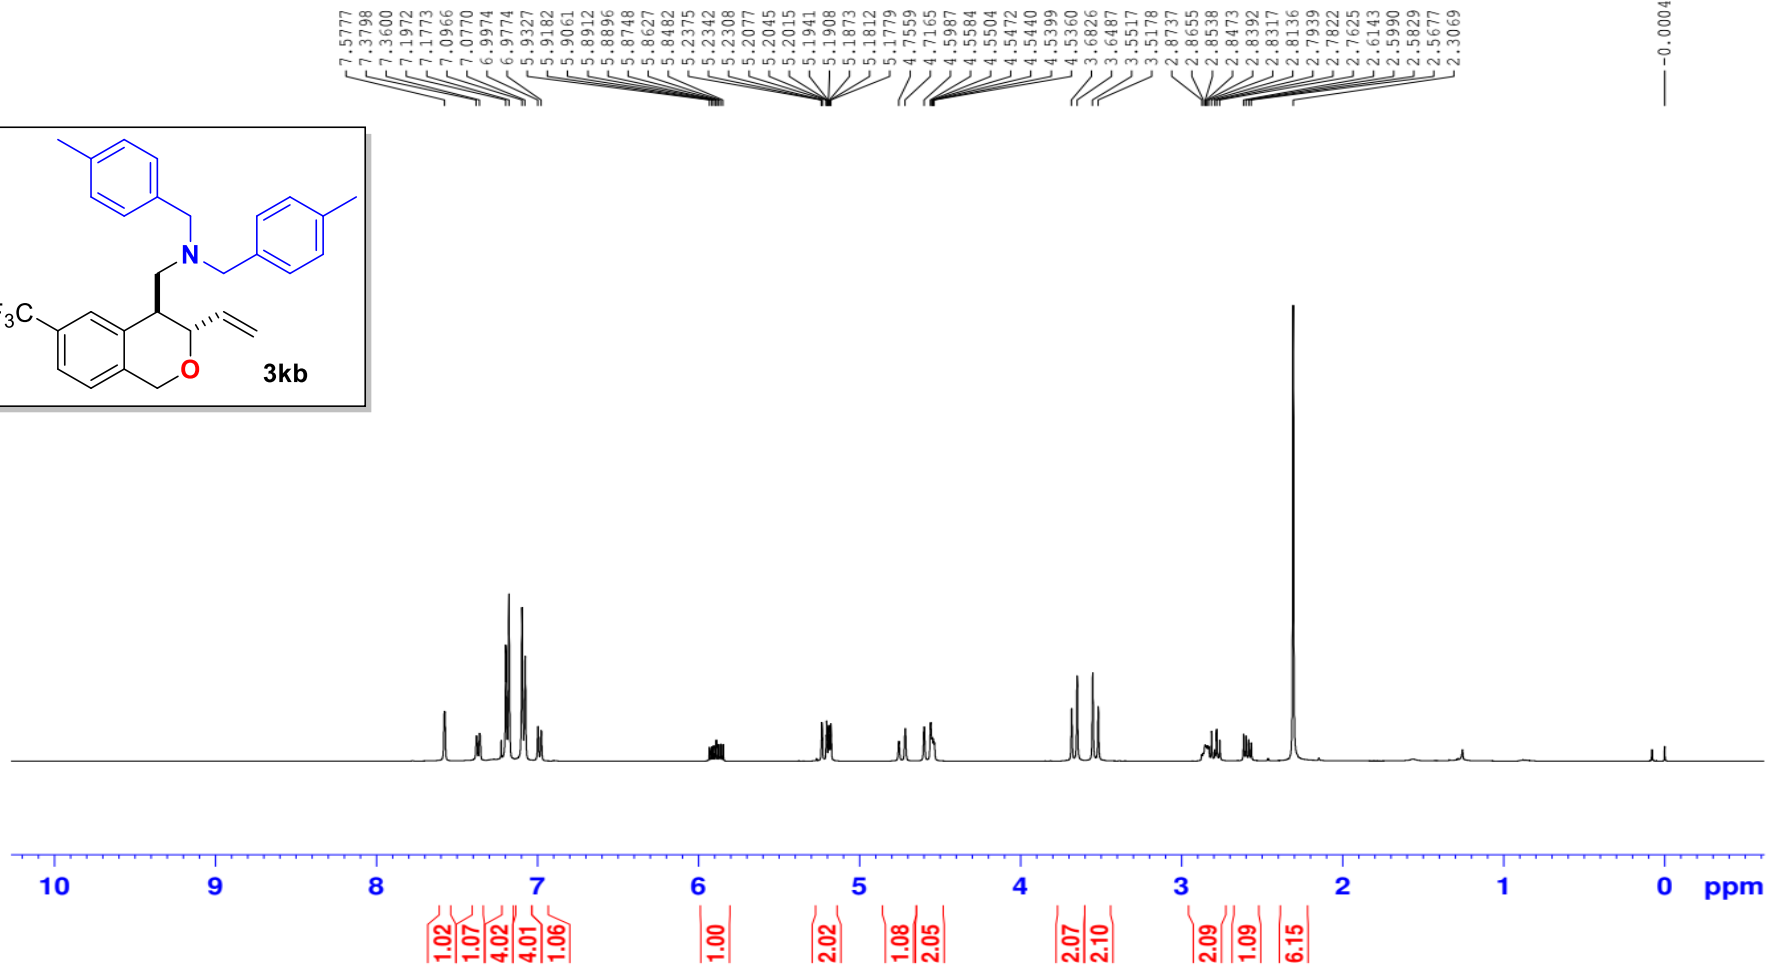

hy-P-3kb <sup>13</sup>C NMR (100MHz CDCl<sub>3</sub>)

hy-diene-5-cf3-c--

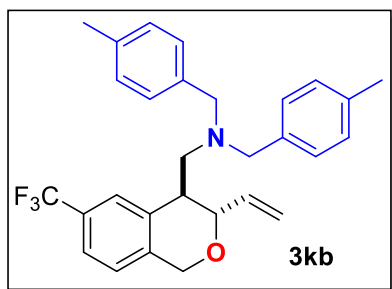

138.4  
136.6  
136.5  
136.1  
136.0  
129.1  
129.0  
128.9  
128.6  
128.2  
126.8  
126.7  
126.7  
126.6  
125.8  
124.5  
123.1  
122.9  
122.9  
122.8  
120.4  
118.4

77.5  
77.2  
76.8  
74.8

63.5  
59.3  
59.0

39.4

21.2

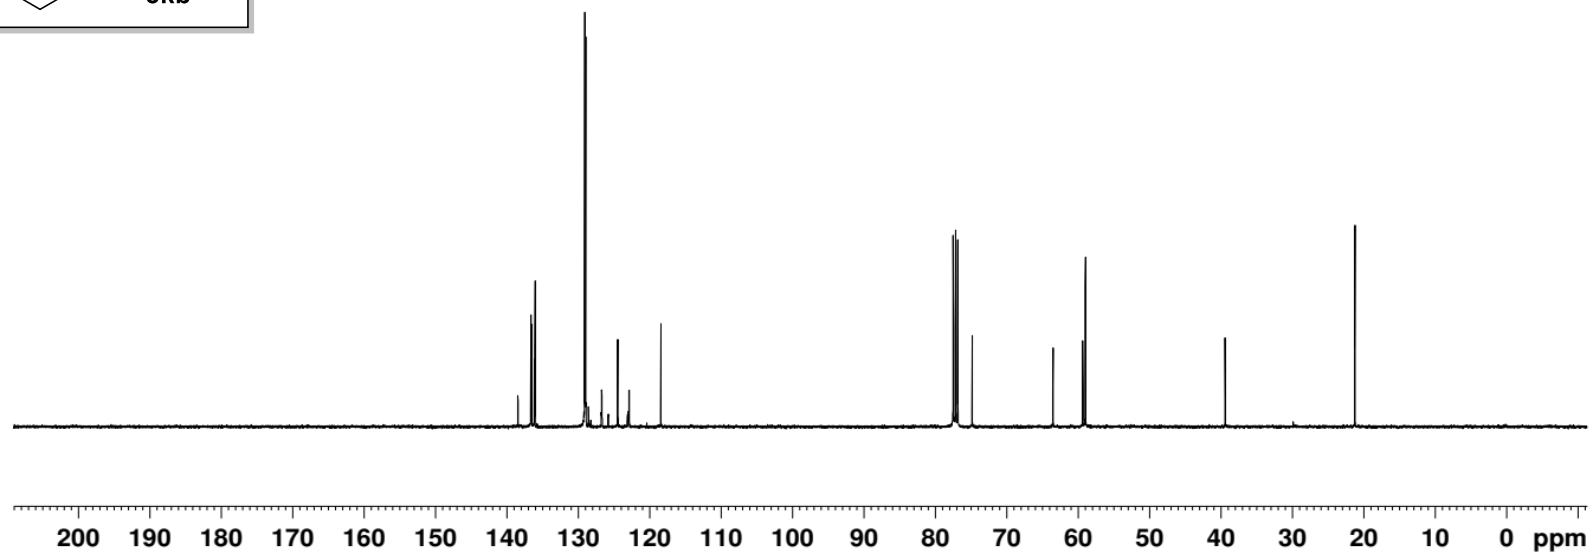

hy-P-3kb <sup>19</sup>F NMR (376MHz CDCl<sub>3</sub>)

hy-diene-5-cf3-f

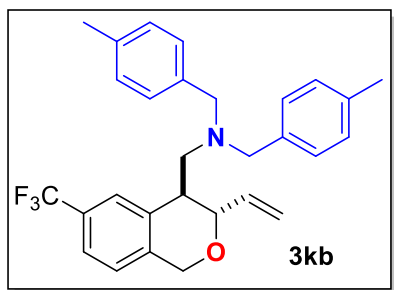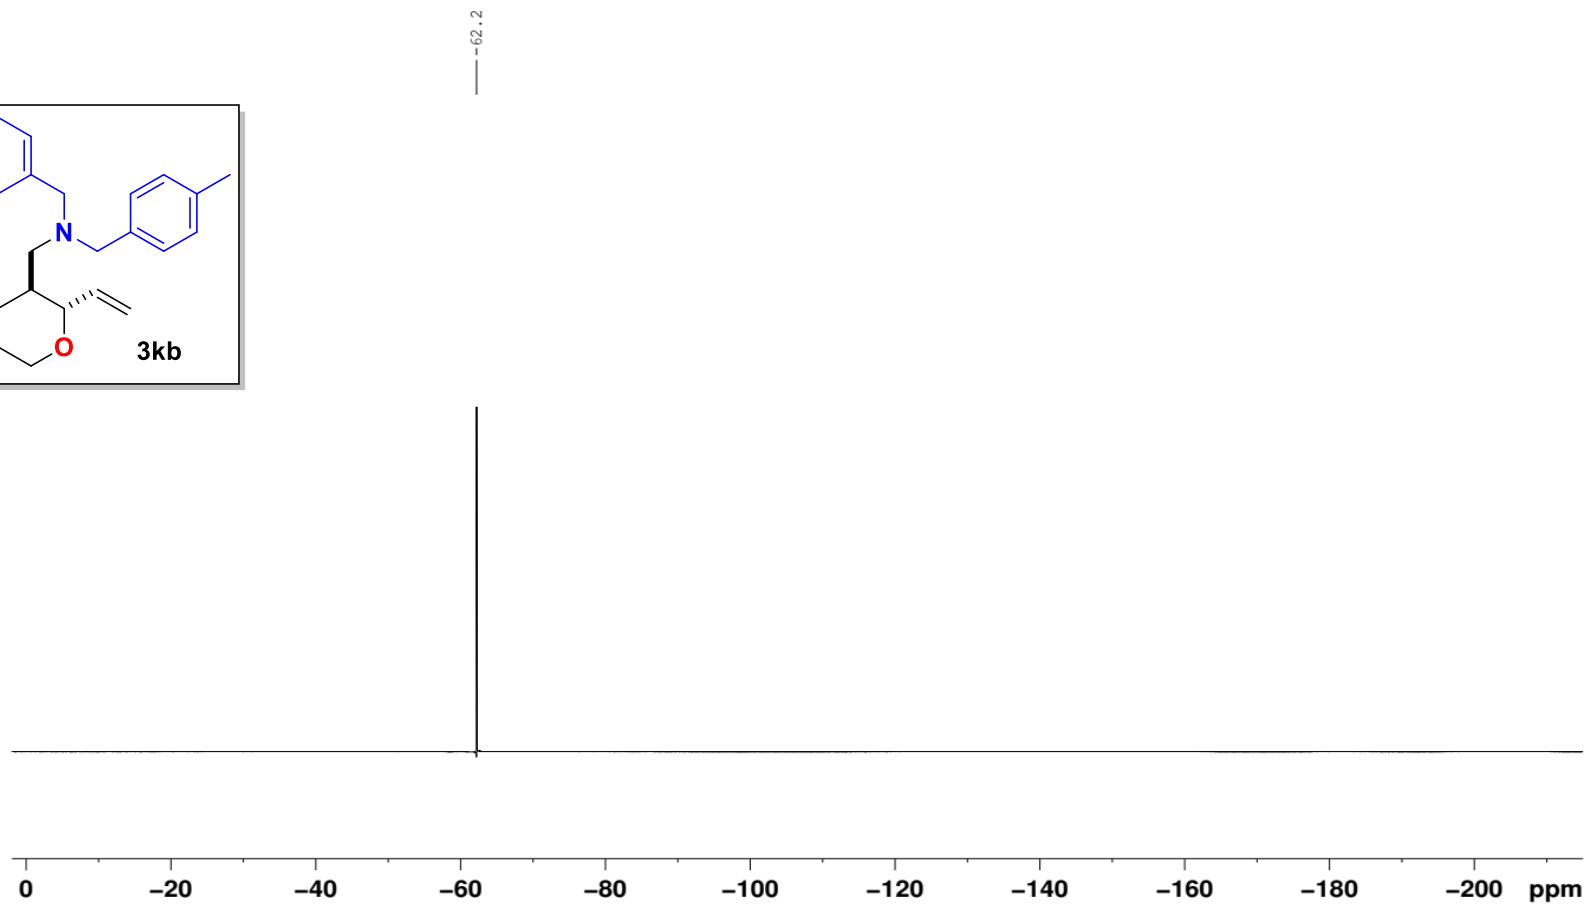

hy-P-31b <sup>1</sup>H NMR (400MHz CDCl<sub>3</sub>)

hy-diene-nai

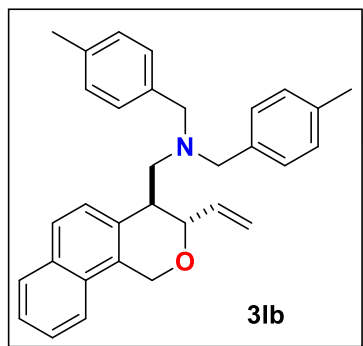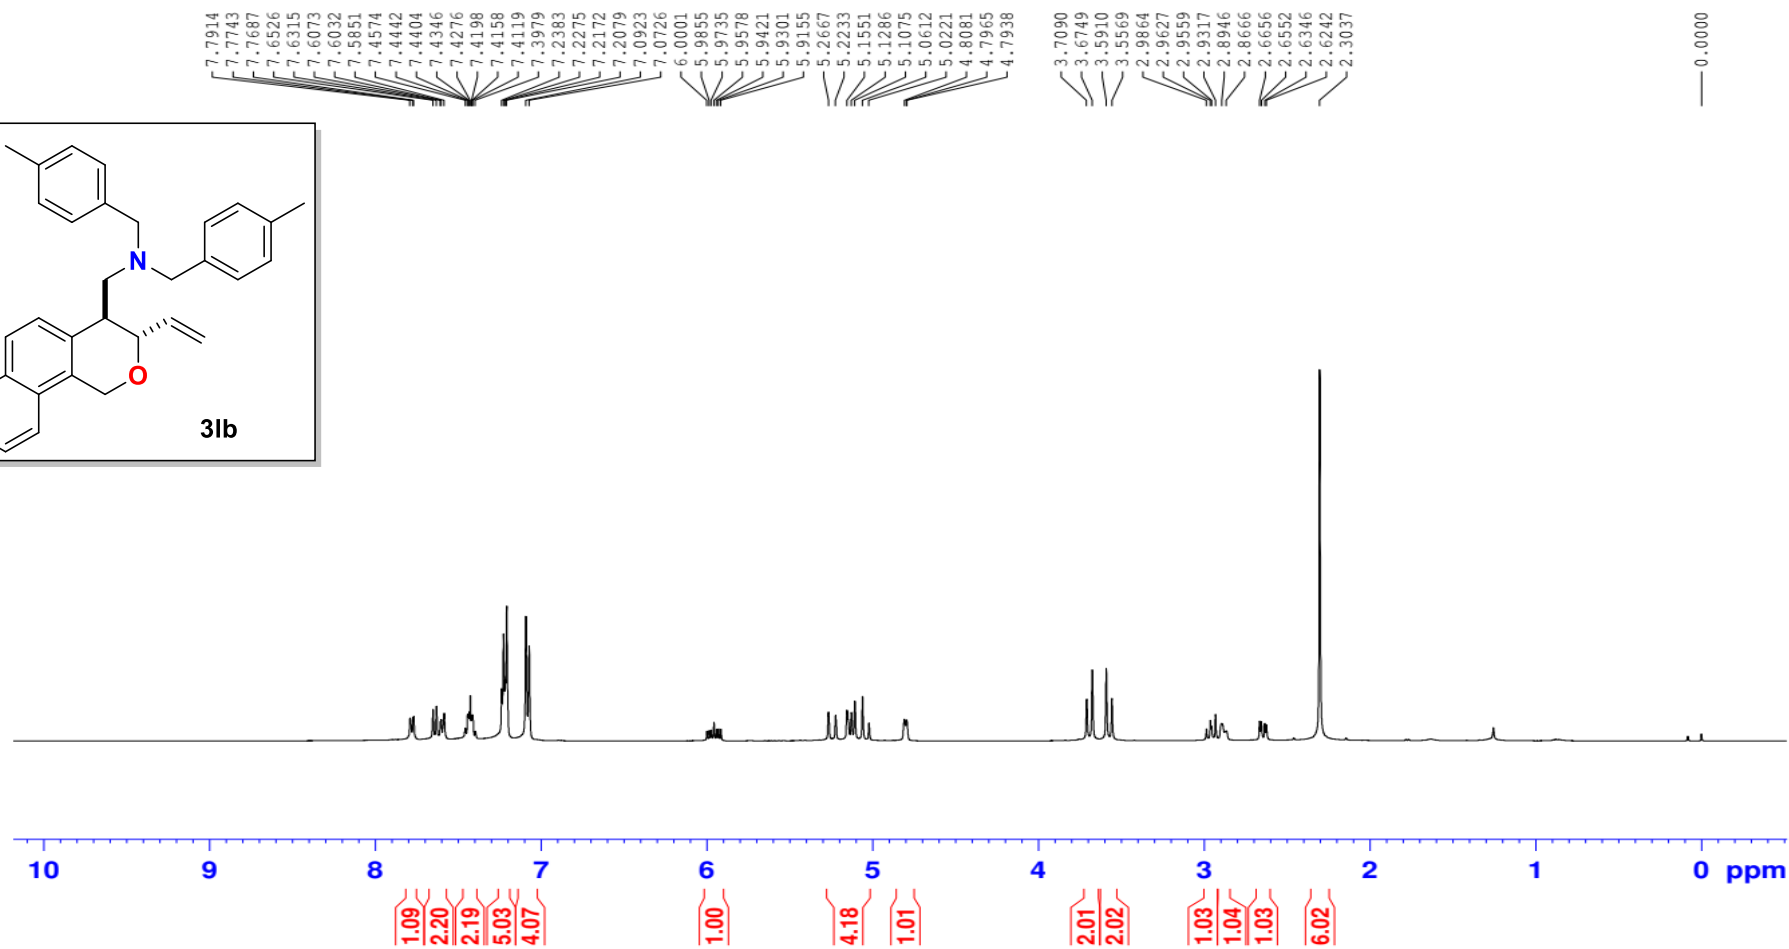



hy-P-3**1b** <sup>13</sup>C NMR (100MHz CDCl<sub>3</sub>)

hy-diene-nai-c-

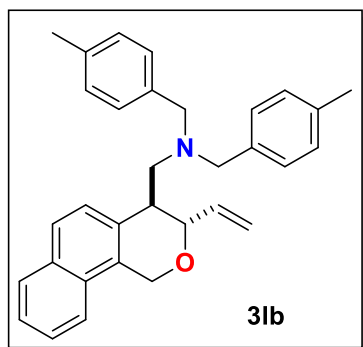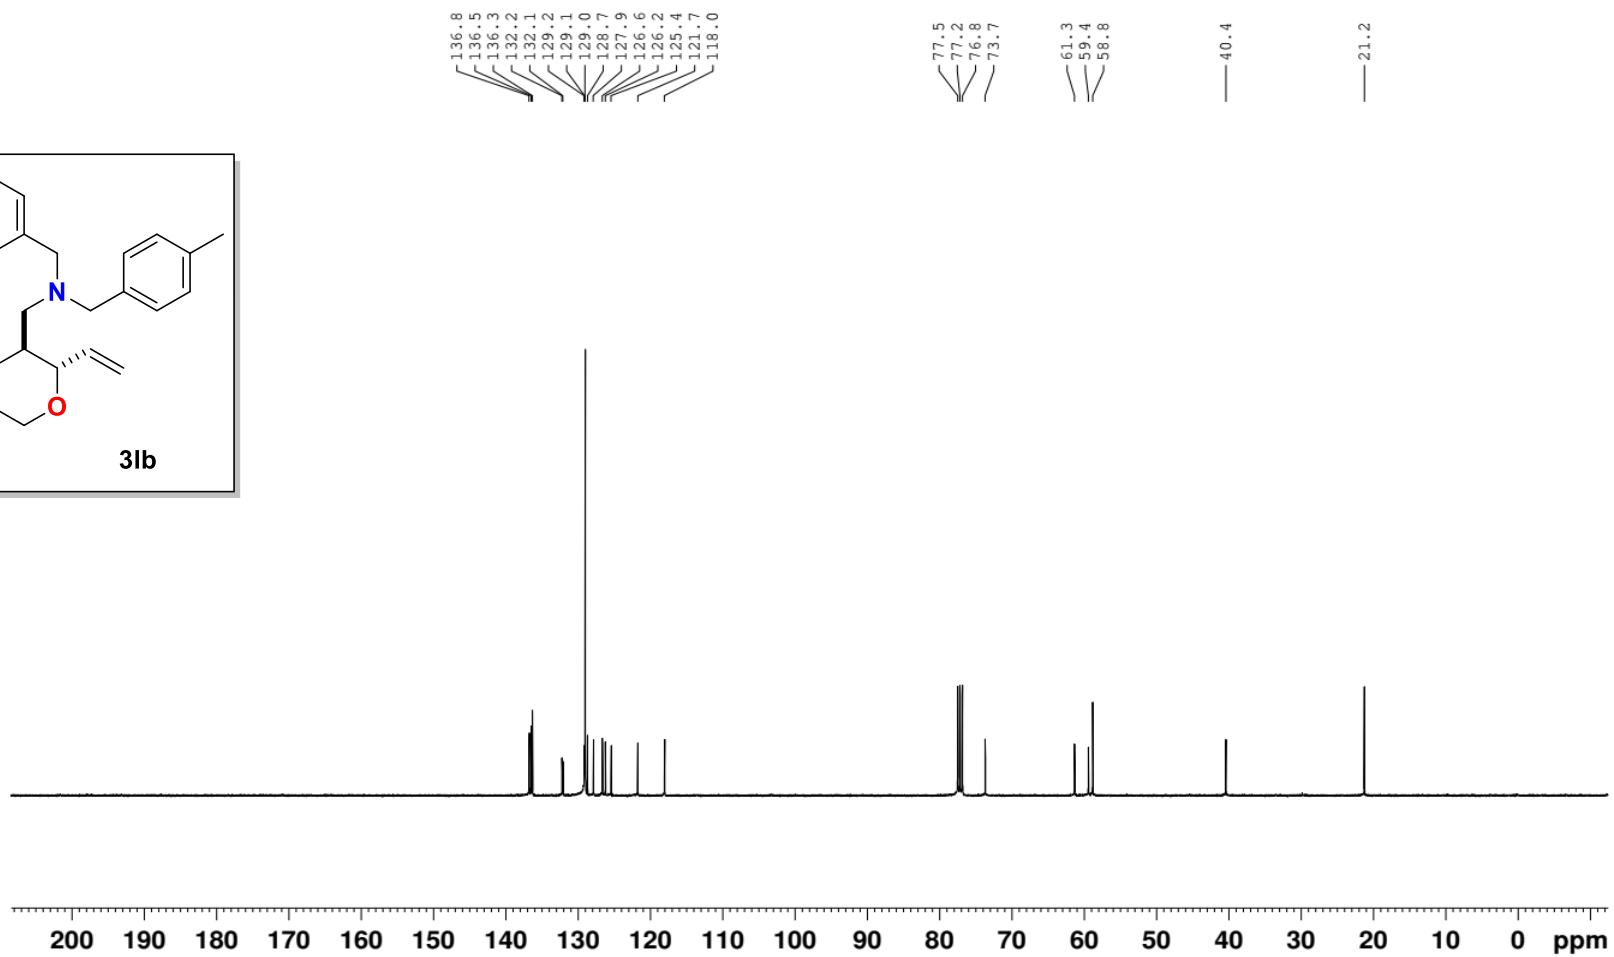

hy-P-3mb-1 <sup>1</sup>H NMR (400MHz CDCl<sub>3</sub>)

hy-diene-cha-ph-up-1-2

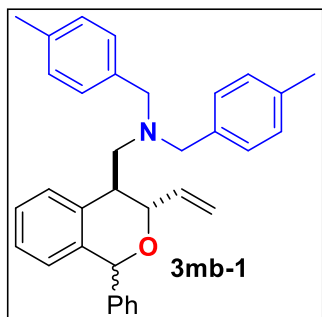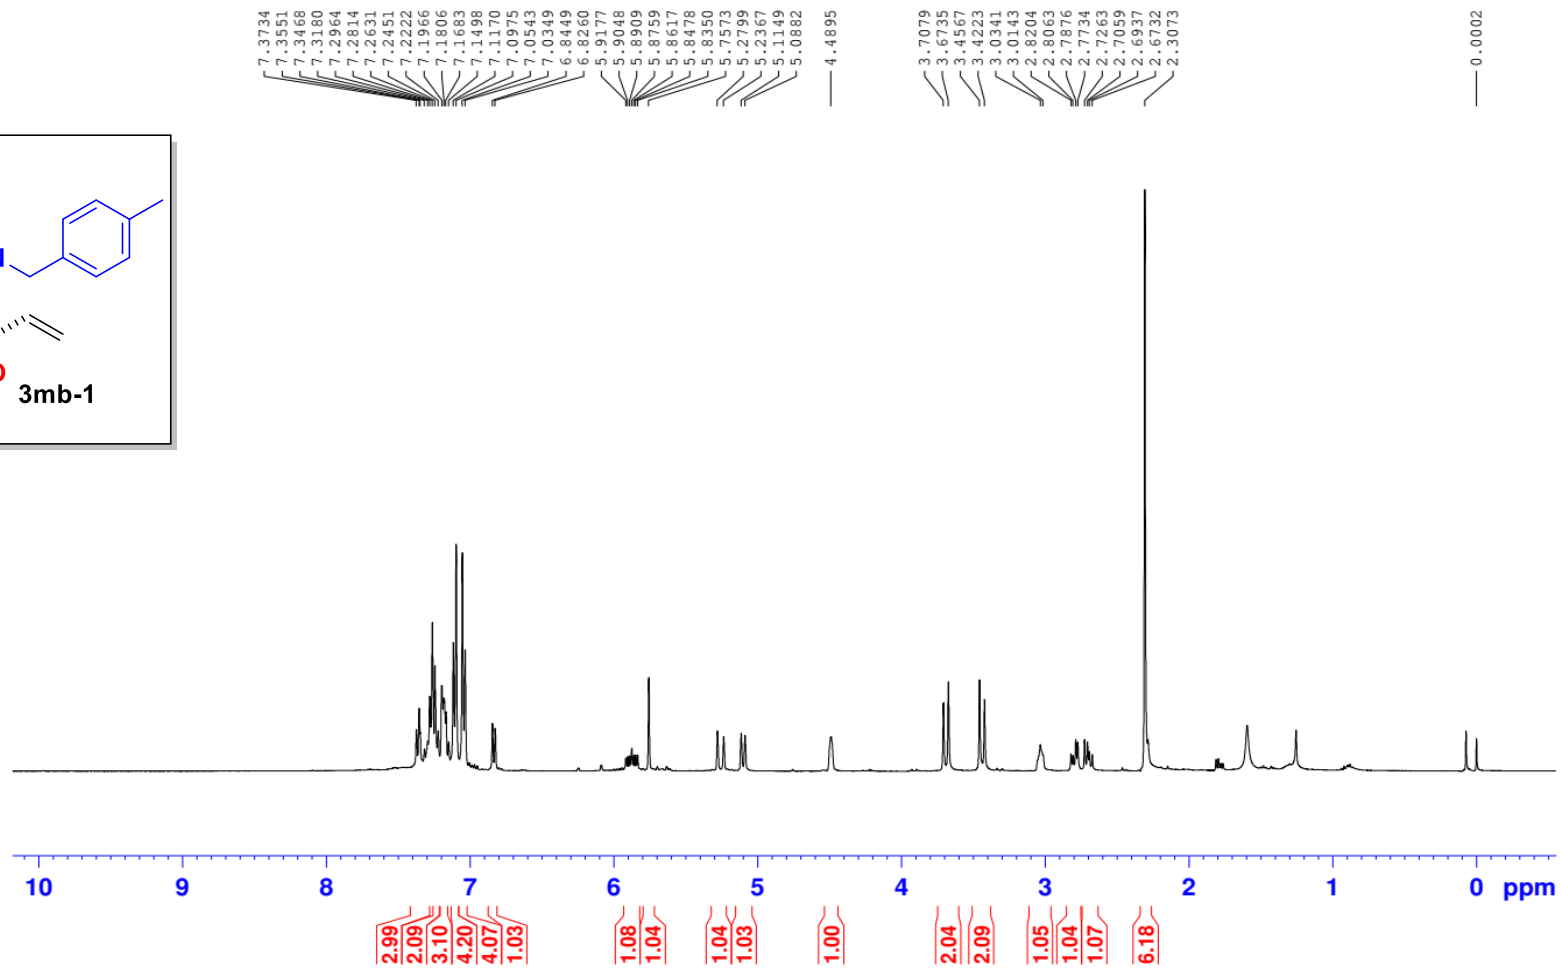

hy-P-3mb-1 <sup>13</sup>C NMR (100MHz CDCl<sub>3</sub>)

hy-x210705-2-1

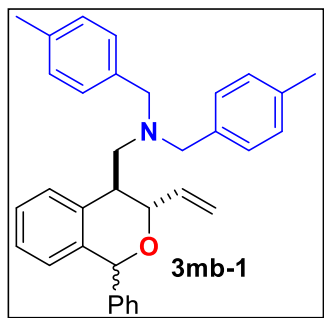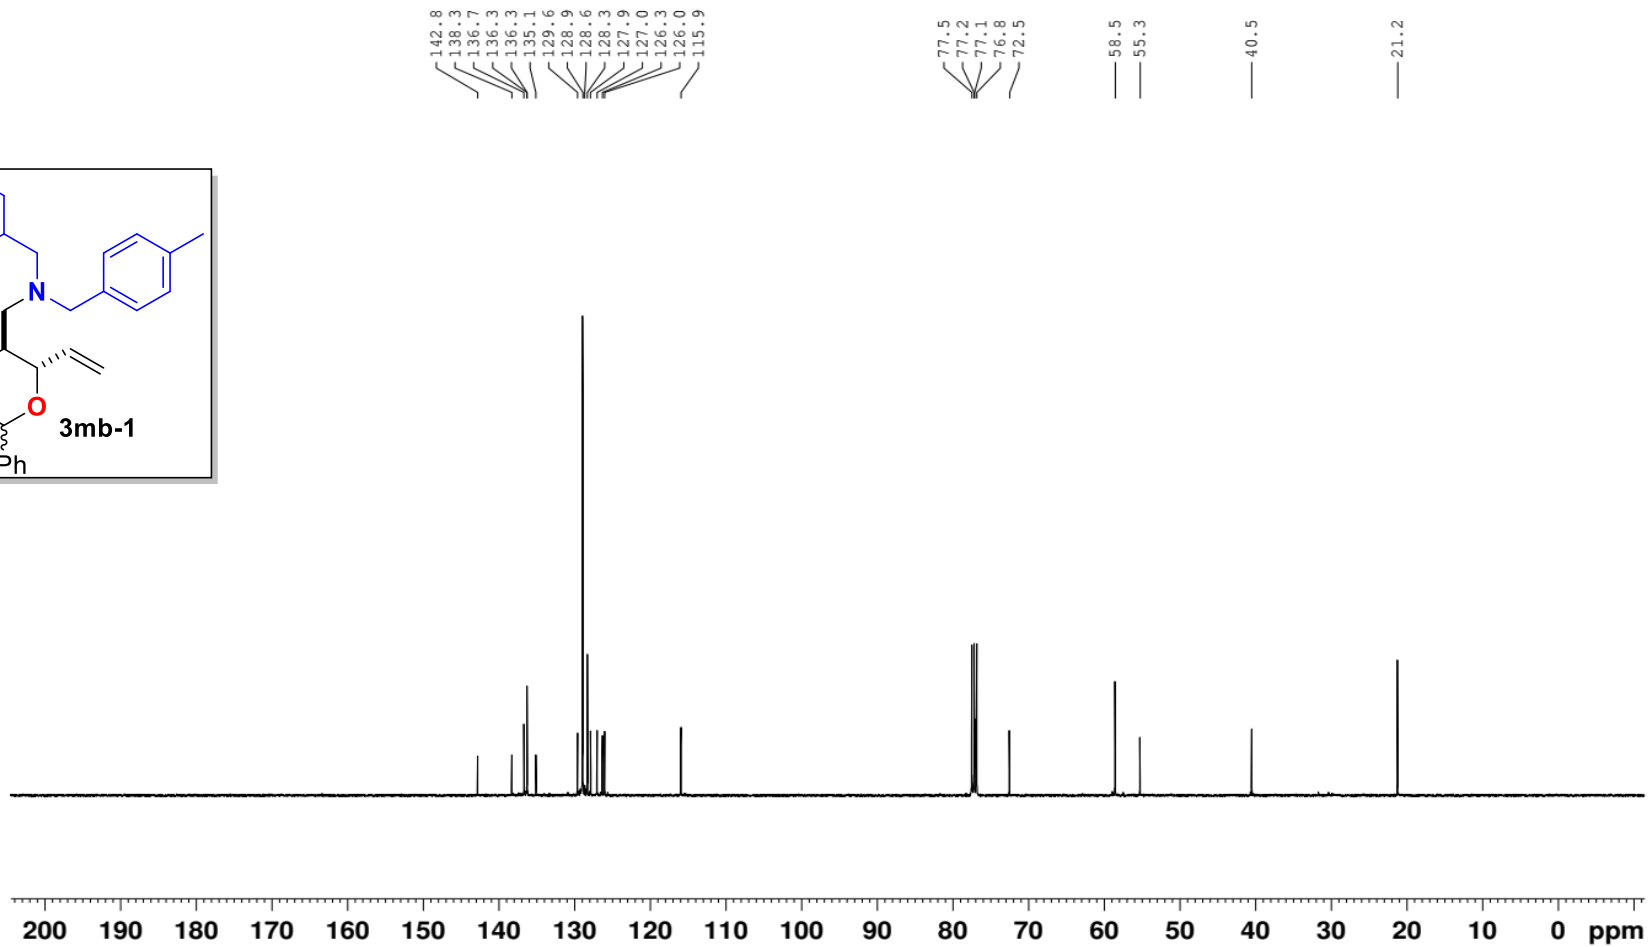

hy-P-3mb-2 <sup>1</sup>H NMR (400MHz CDCl<sub>3</sub>)

hy-diene-cha-ph-down-3

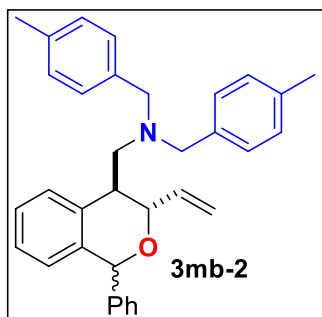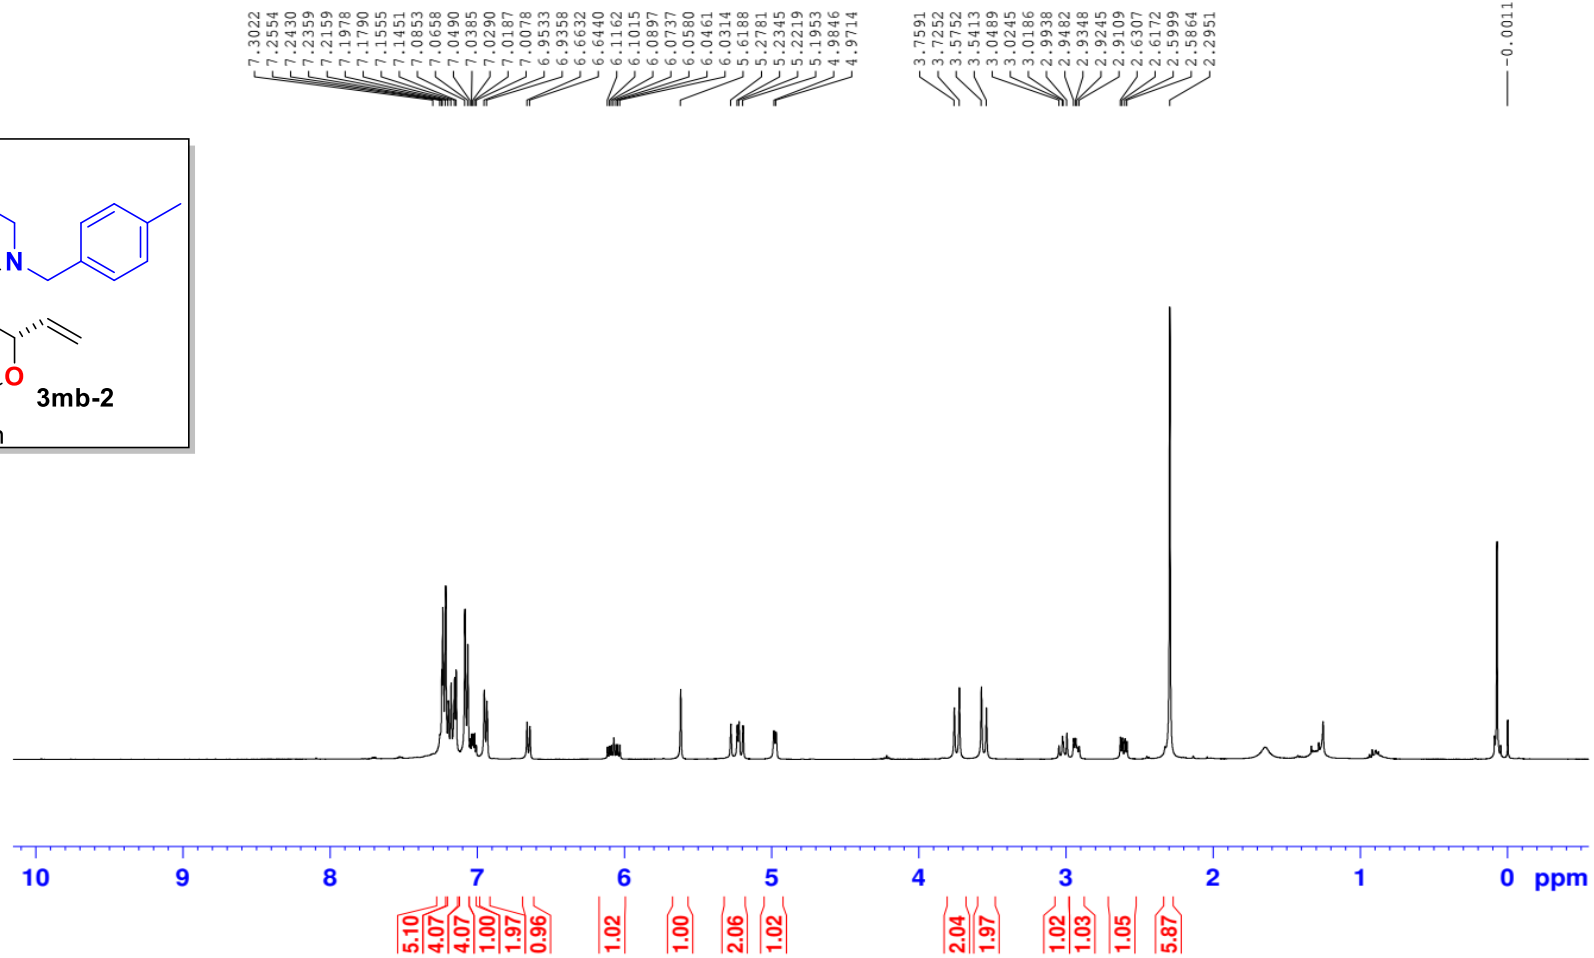

hy-P-3mb-2 <sup>13</sup>C NMR (100MHz CDCl<sub>3</sub>)

hy-diene-cha-ph-down-c-

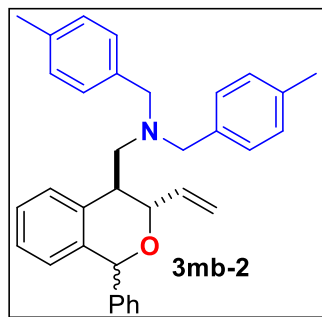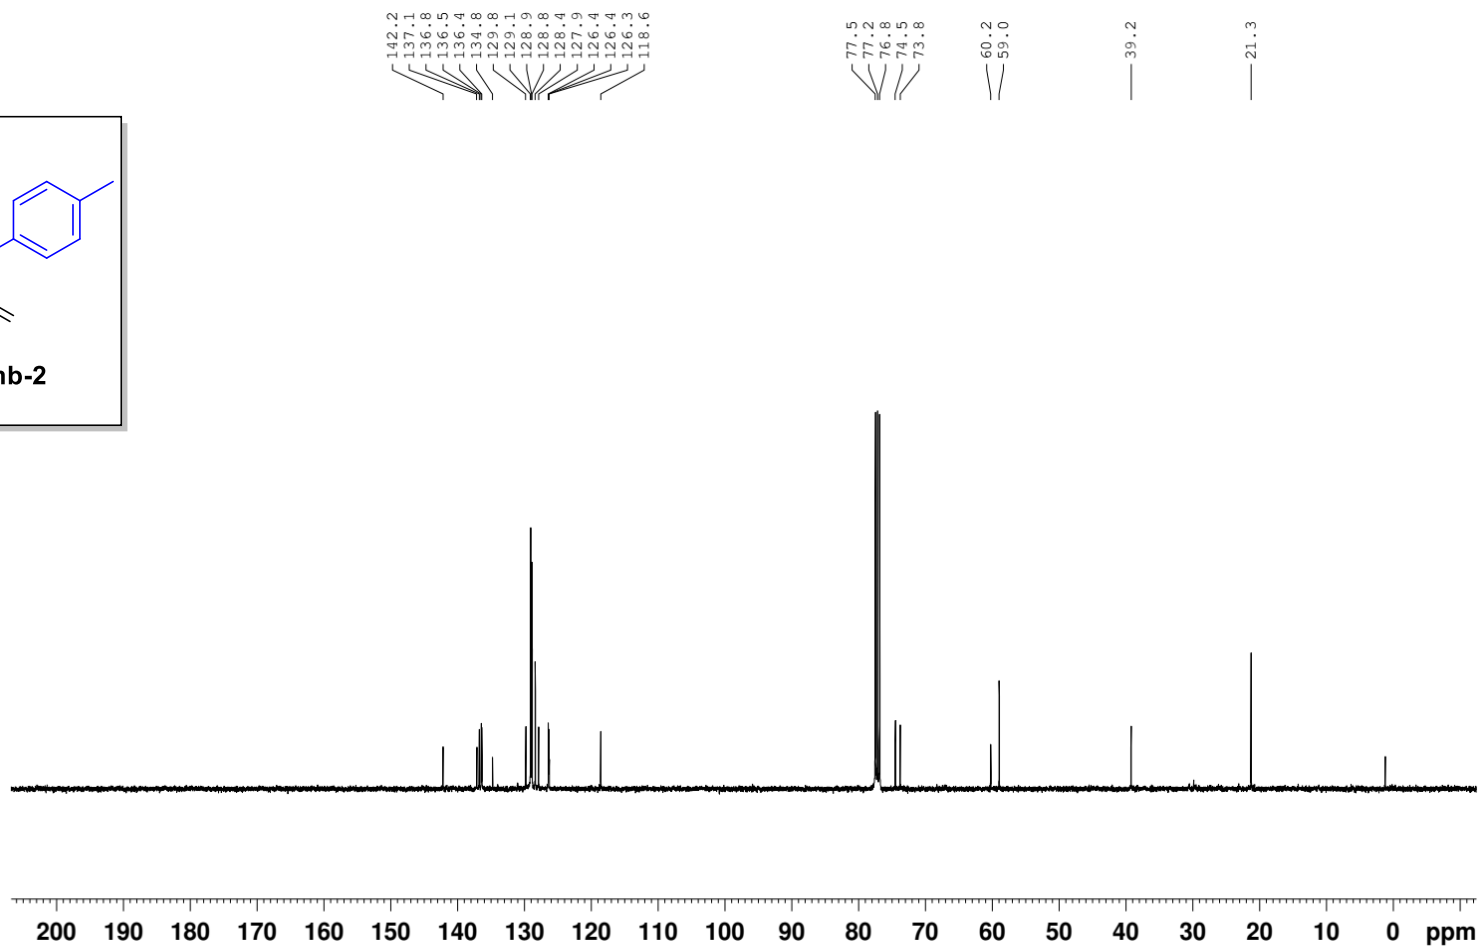

hy-P-3nb-1 <sup>1</sup>H NMR (400MHz CDCl<sub>3</sub>)

hy-diene-cha-ph-p-och3-up-h-

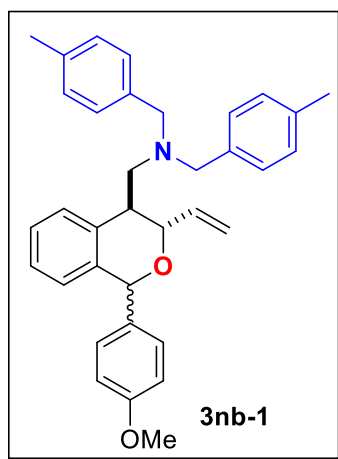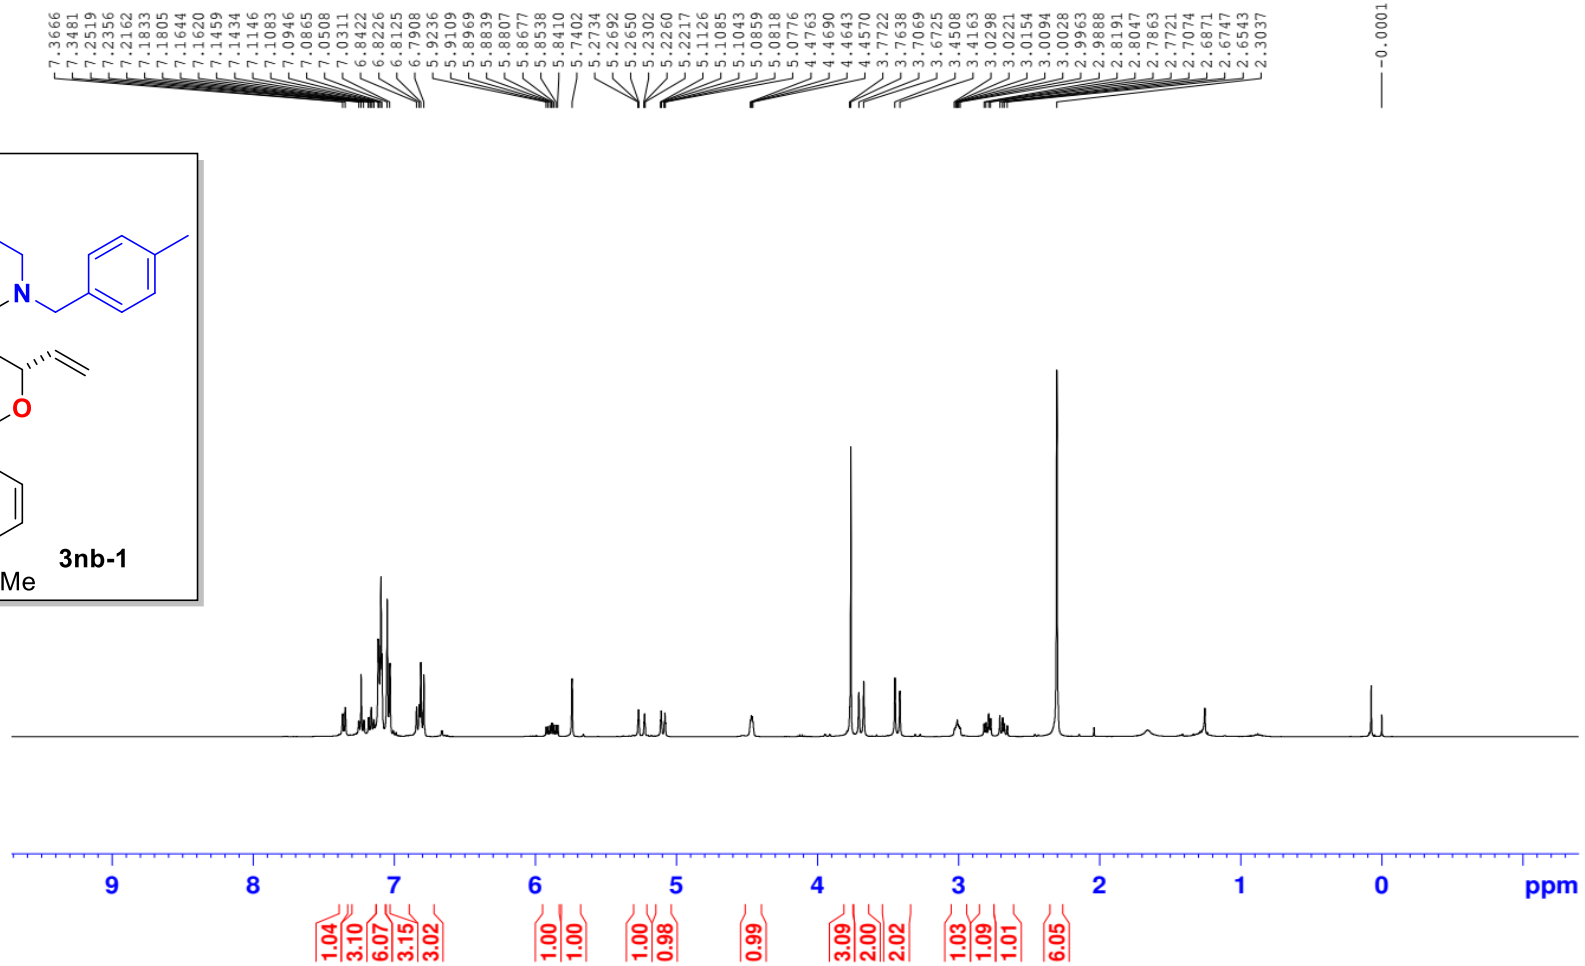

hy-P-3nb-1 <sup>13</sup>C NMR (100MHz CDCl<sub>3</sub>)

hy-diene-cha-ph-p-och3-up-c--

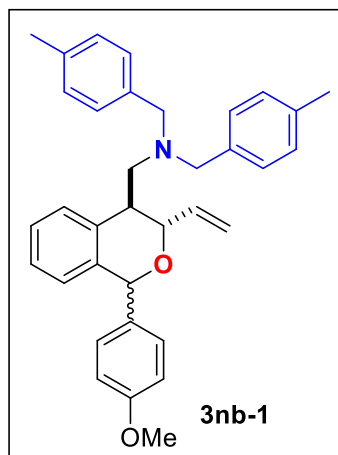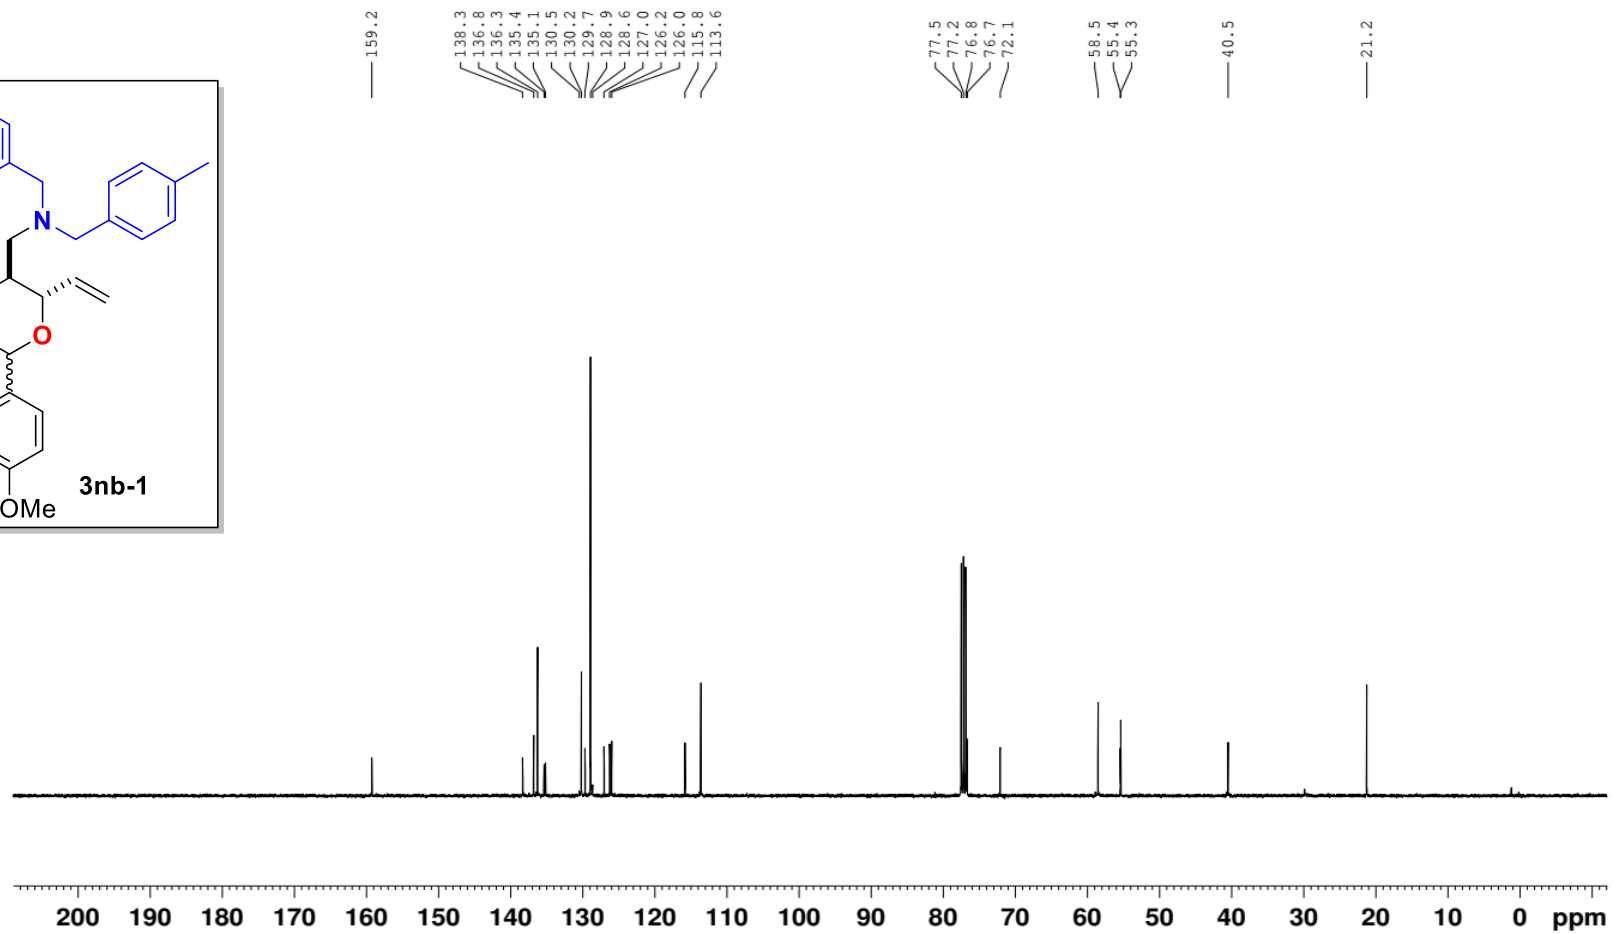

hy-P-3nb-2 <sup>1</sup>H NMR (400MHz CDCl<sub>3</sub>)

hy-diene-cha-ph-p-och3-down-c--

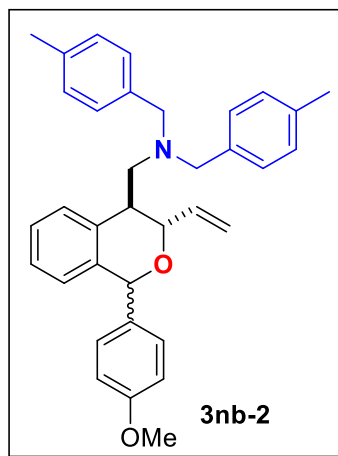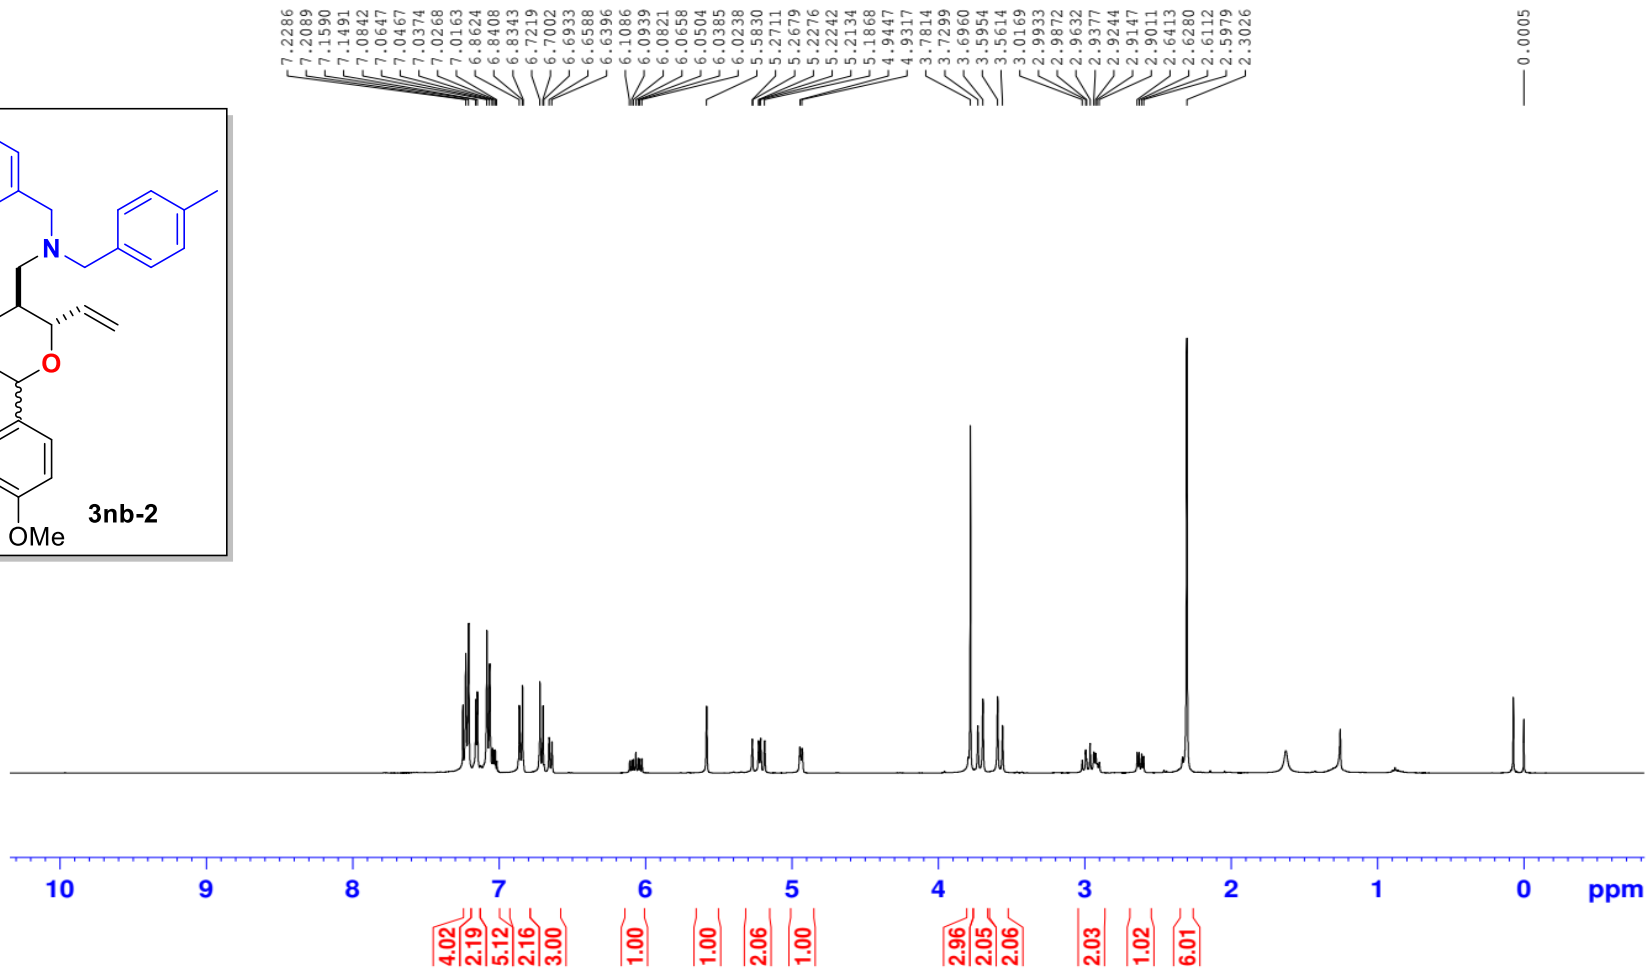





hy-P-3ob <sup>1</sup>H NMR (400MHz CDCl<sub>3</sub>)

hy-diene-cha-dich3-down-2

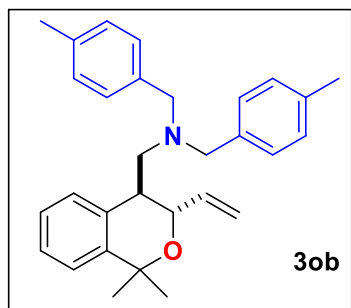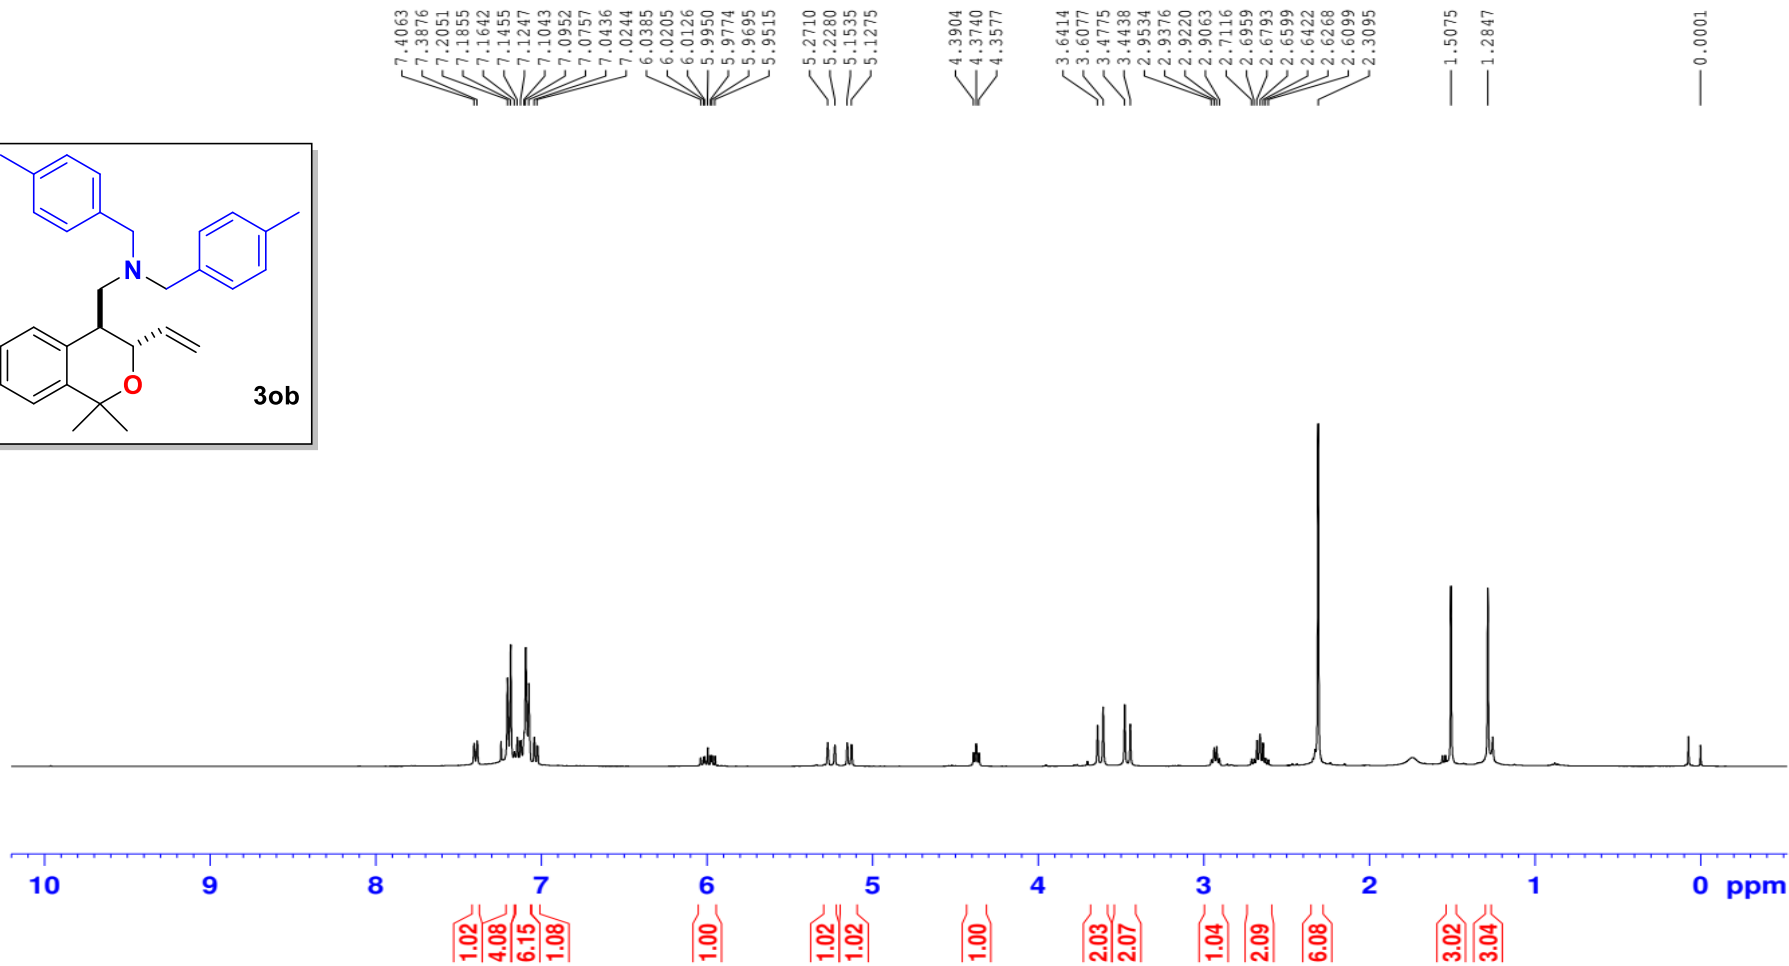

hy-P-3ob <sup>13</sup>C NMR (100MHz CDCl<sub>3</sub>)

hy-diene-cha-dich3-down-c-

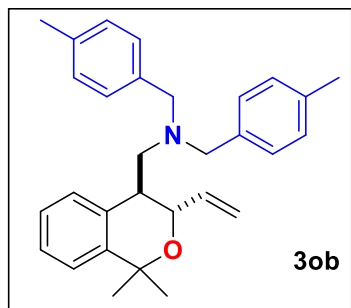

142.7  
139.3  
136.5  
136.2  
135.4  
129.2  
129.0  
126.2  
126.1  
124.8  
117.2

77.4  
77.2  
76.9  
74.3  
73.5

58.6  
58.3

40.3

31.6  
30.8

21.2

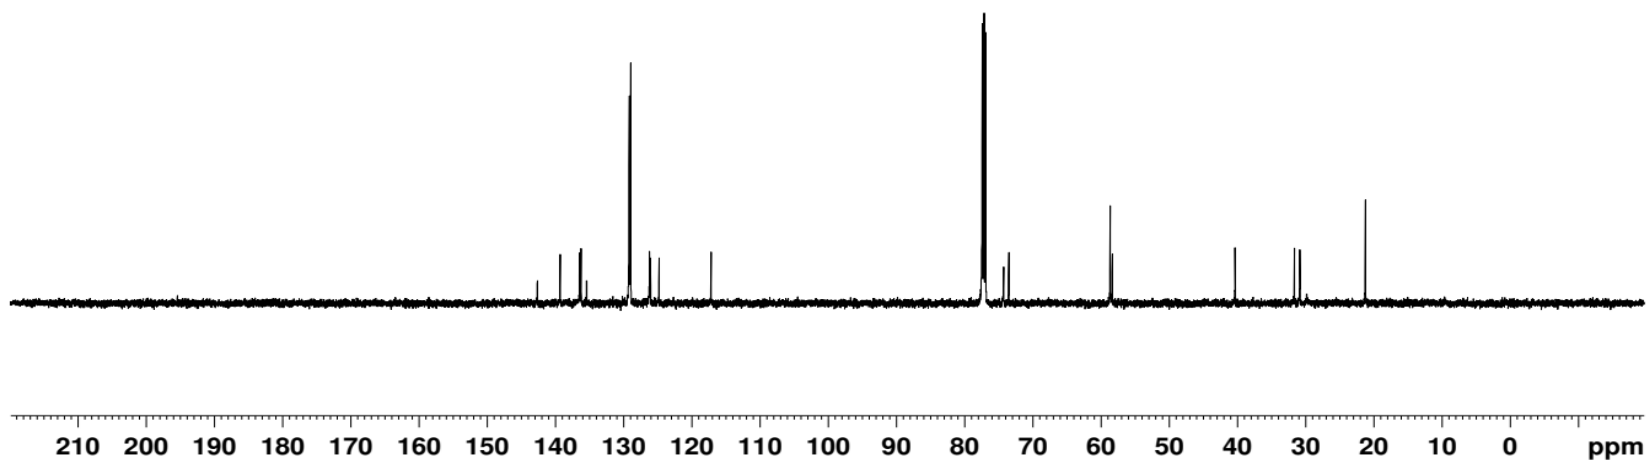

hy-x210705-1-up

hy-P-3pb <sup>1</sup>H NMR (500MHz CDCl<sub>3</sub>)

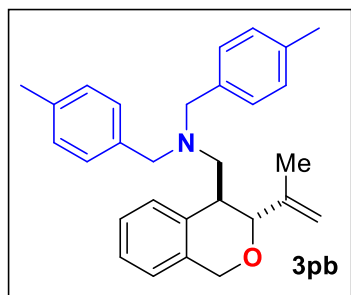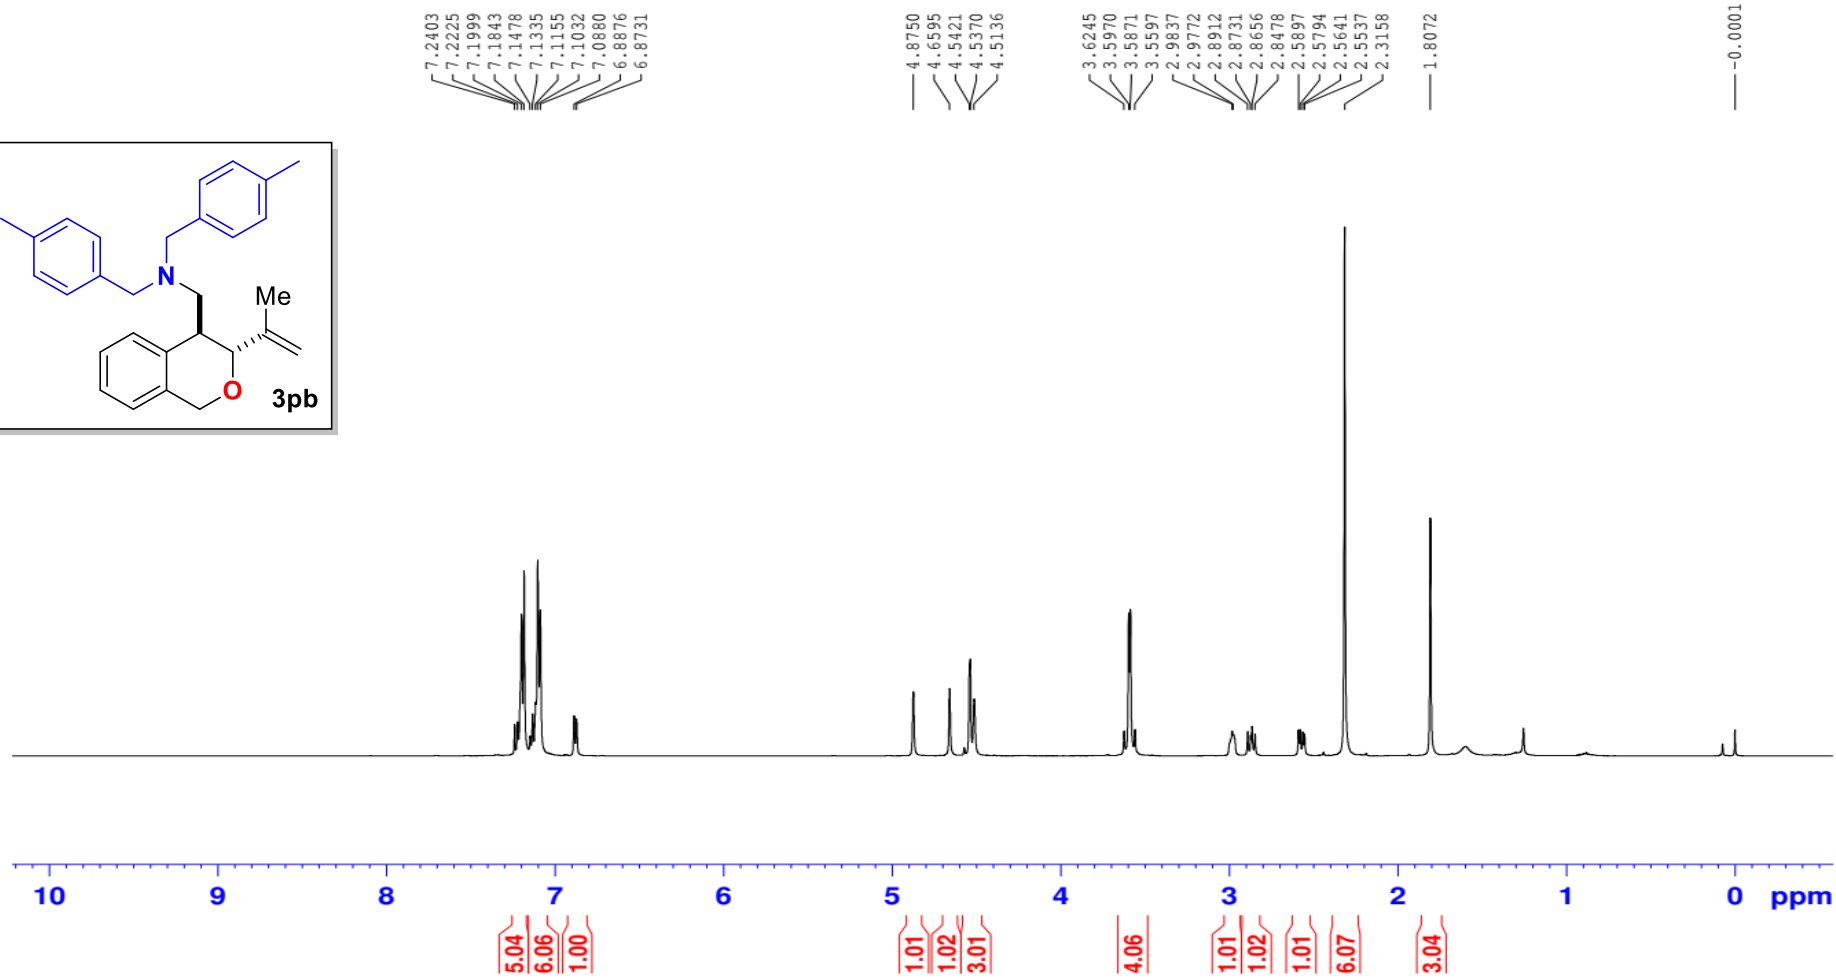

hy-P-3pb <sup>13</sup>C NMR (125MHz CDCl<sub>3</sub>)

hy-x210705-1-up-c

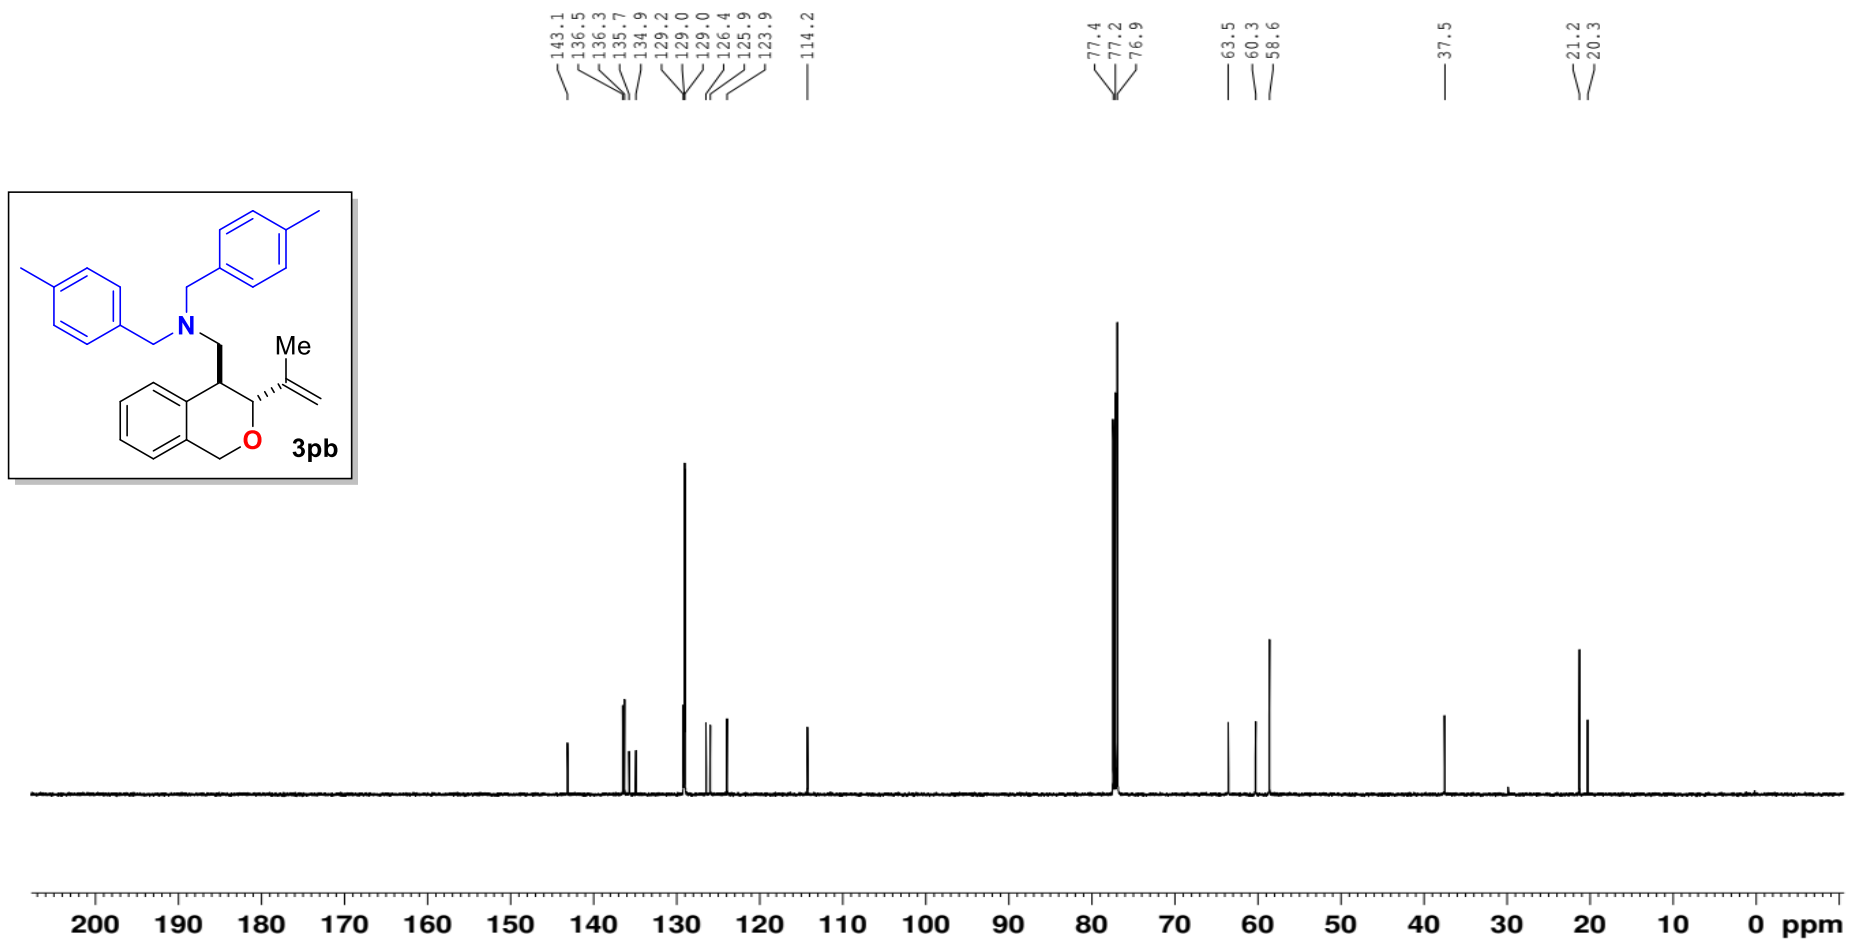

hy-P-3qb <sup>1</sup>H NMR (400MHz CDCl<sub>3</sub>)

hy-diene-trans-d-ch3

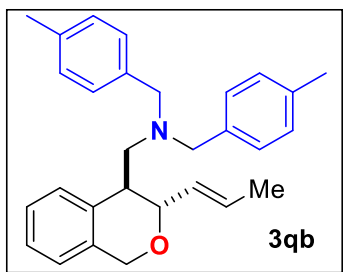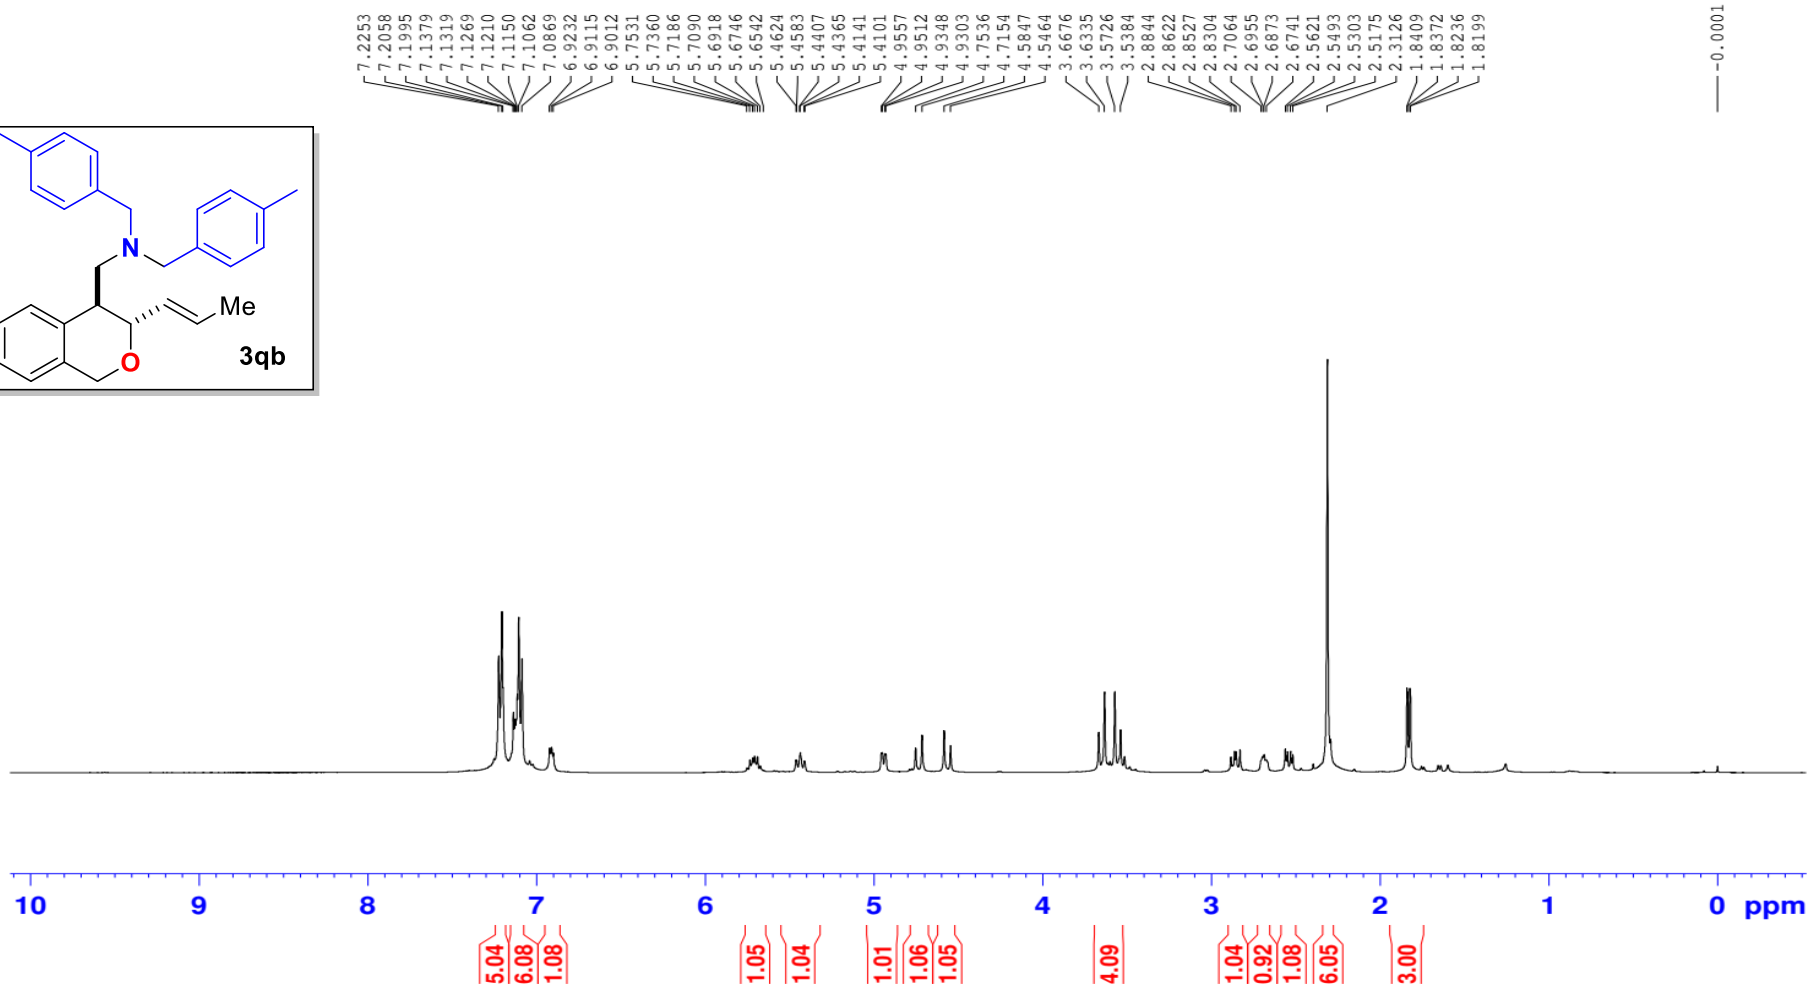

hy-P-3qb <sup>13</sup>C NMR (100MHz CDCl<sub>3</sub>)

hy-trans-d-ch3-c--

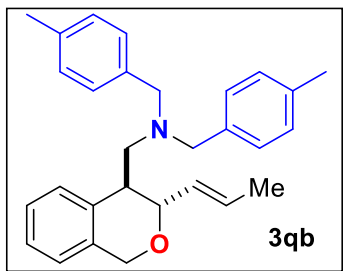

136.4  
136.2  
135.2  
134.9  
130.0  
129.9  
129.0  
129.0  
128.7  
126.3  
126.1  
123.9

77.5  
77.2  
76.8  
69.2  
63.2  
59.5  
58.4

41.1

21.2

13.9

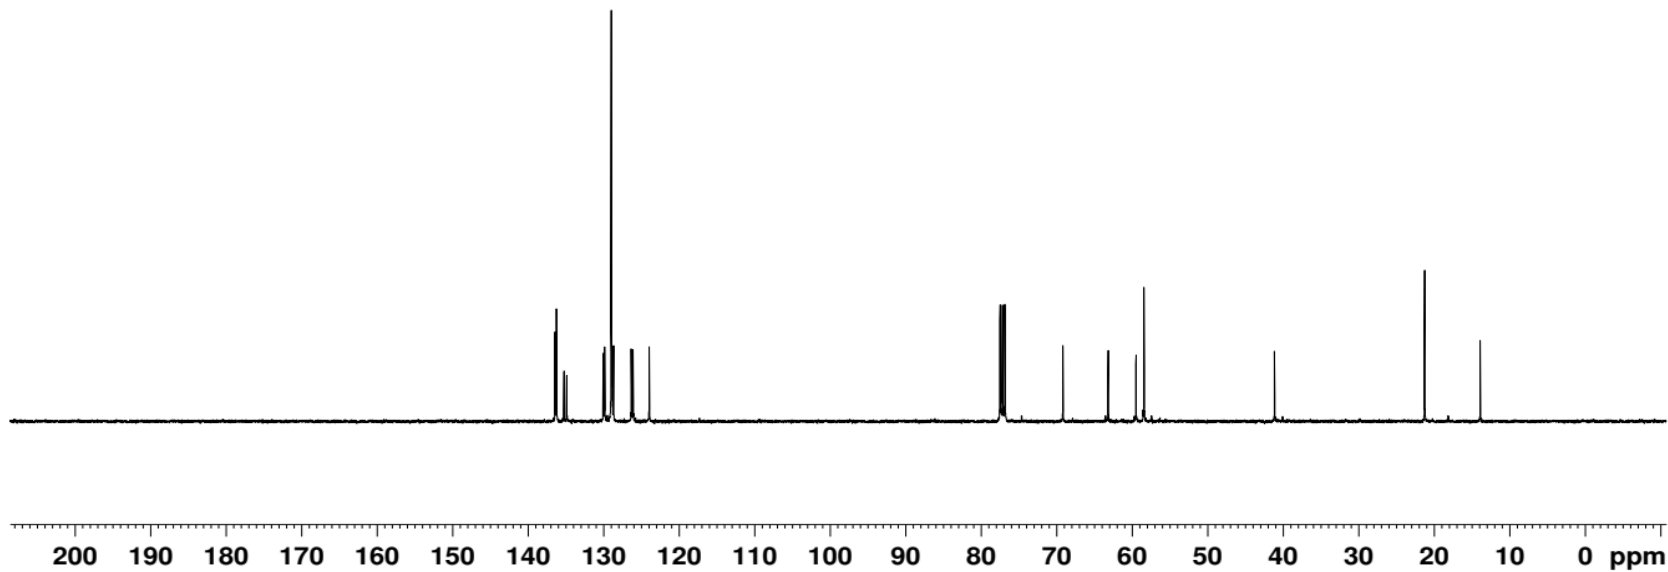

hy-P-3ra <sup>1</sup>H NMR (400MHz CDCl<sub>3</sub>)

ybk-x210906-2

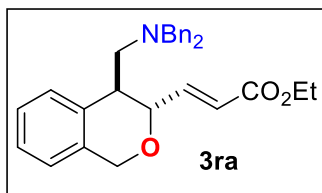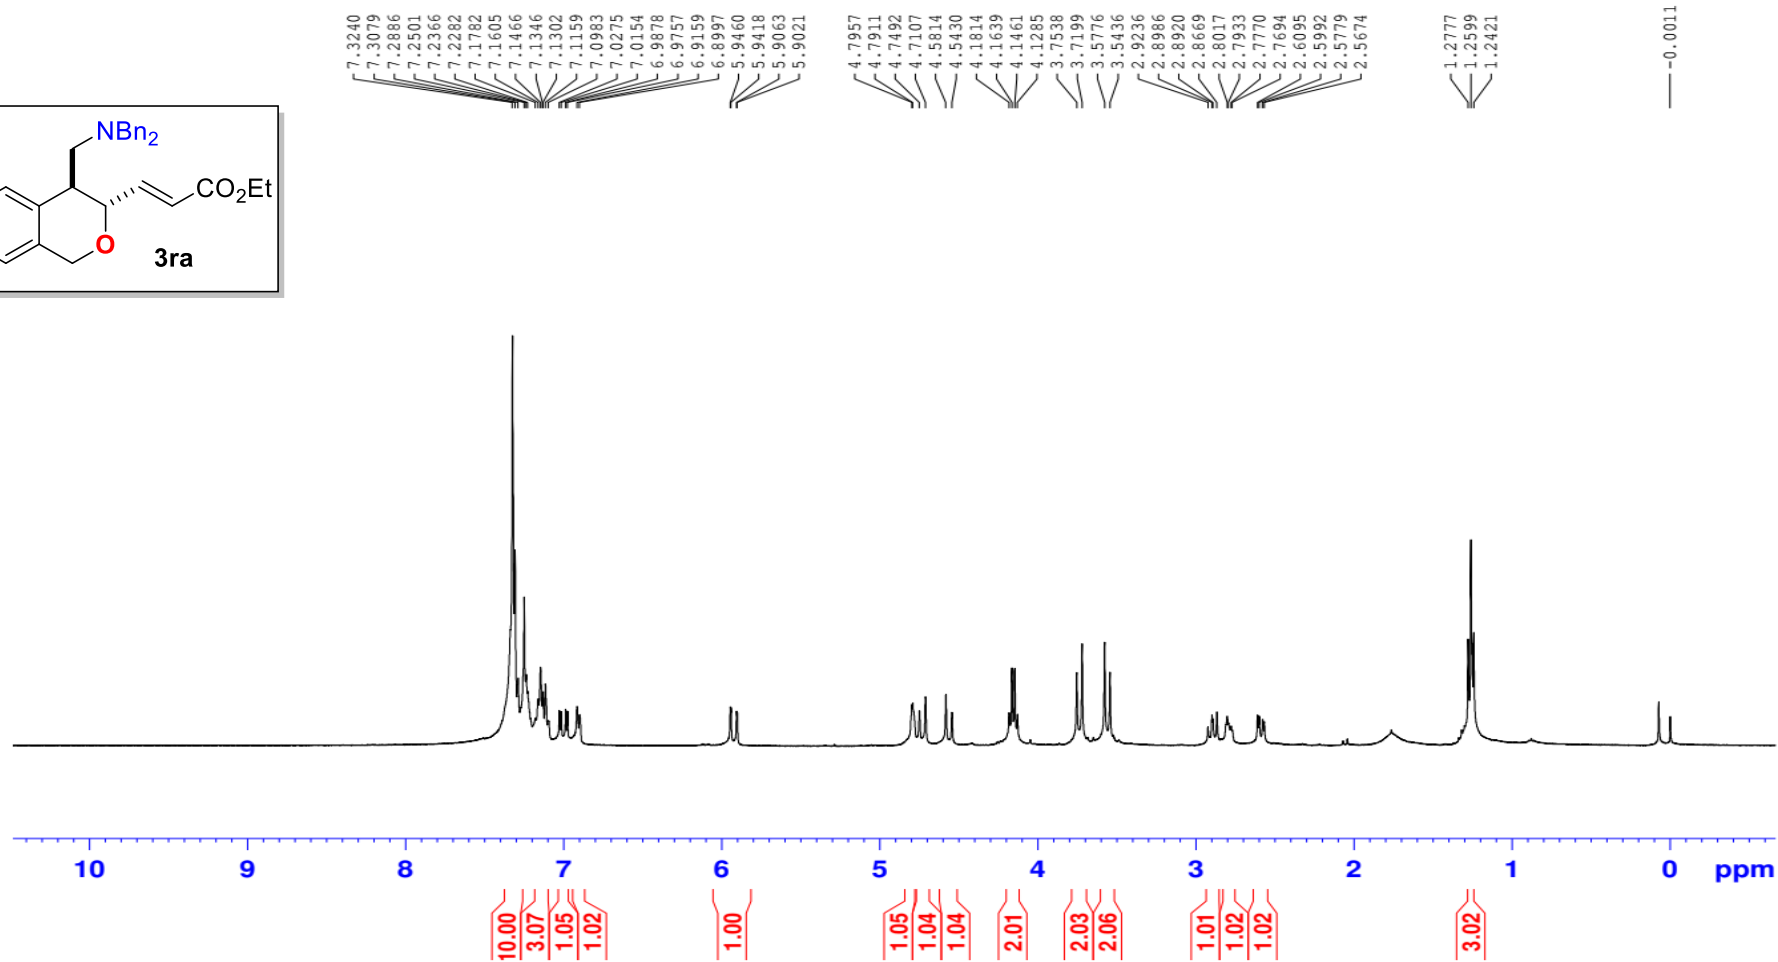



hy-P-3ra <sup>13</sup>C NMR (125MHz CDCl<sub>3</sub>)

ybk-x210906-2-c

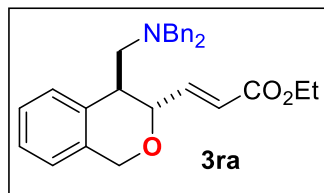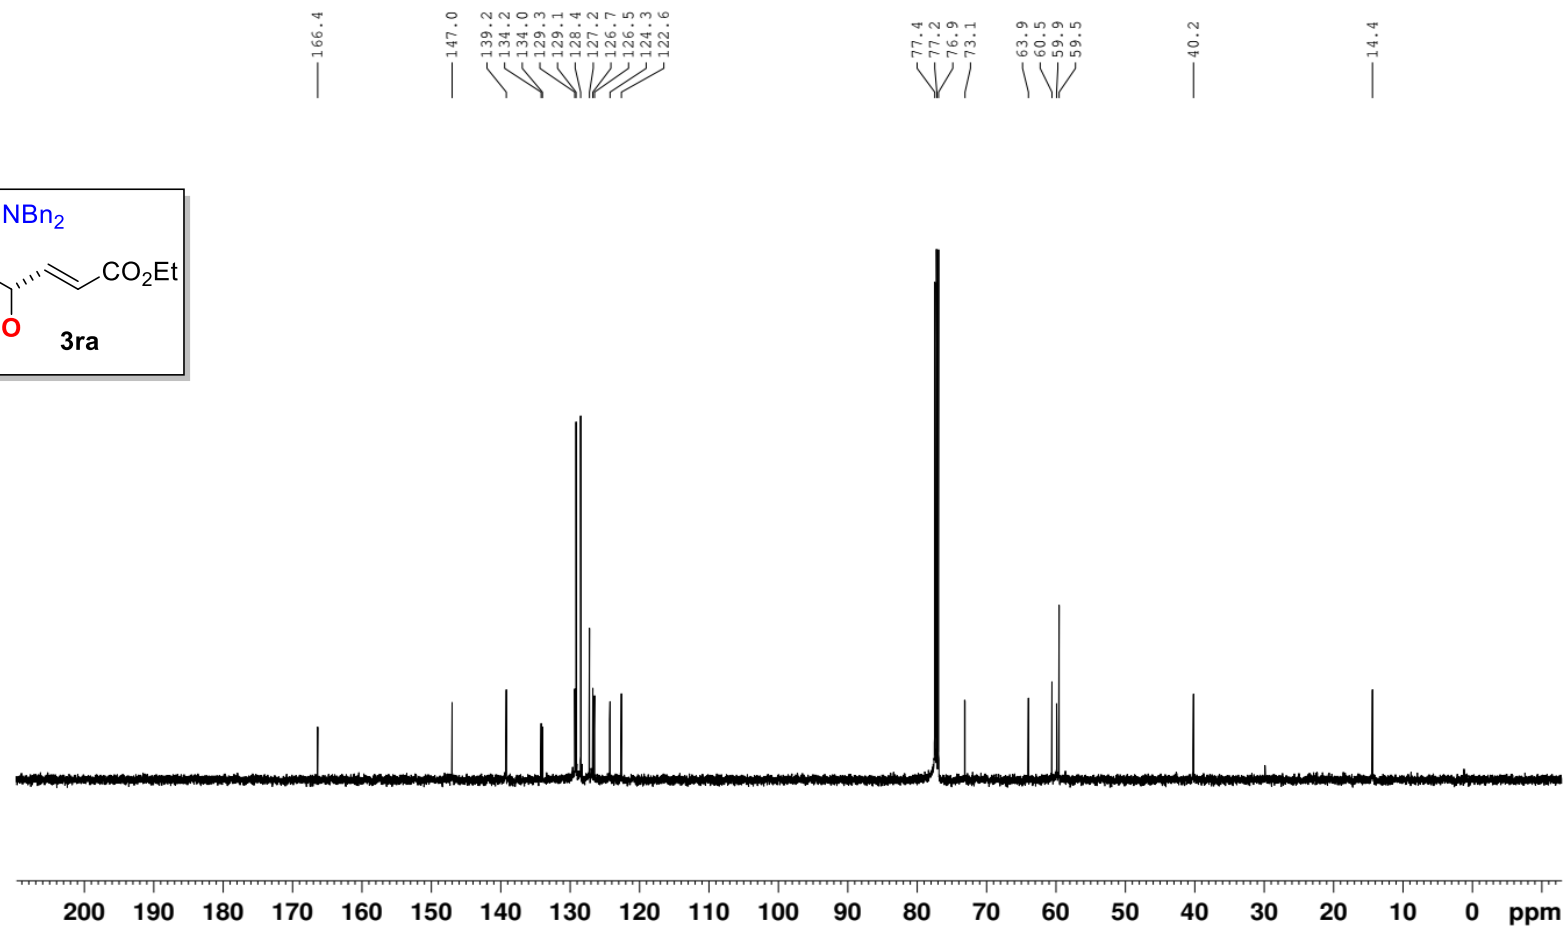

hy-P-4aa <sup>1</sup>H NMR (400MHz CDCl<sub>3</sub>)

HY-BIAO-LIU-UP-HNMR

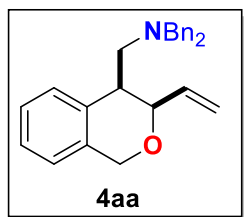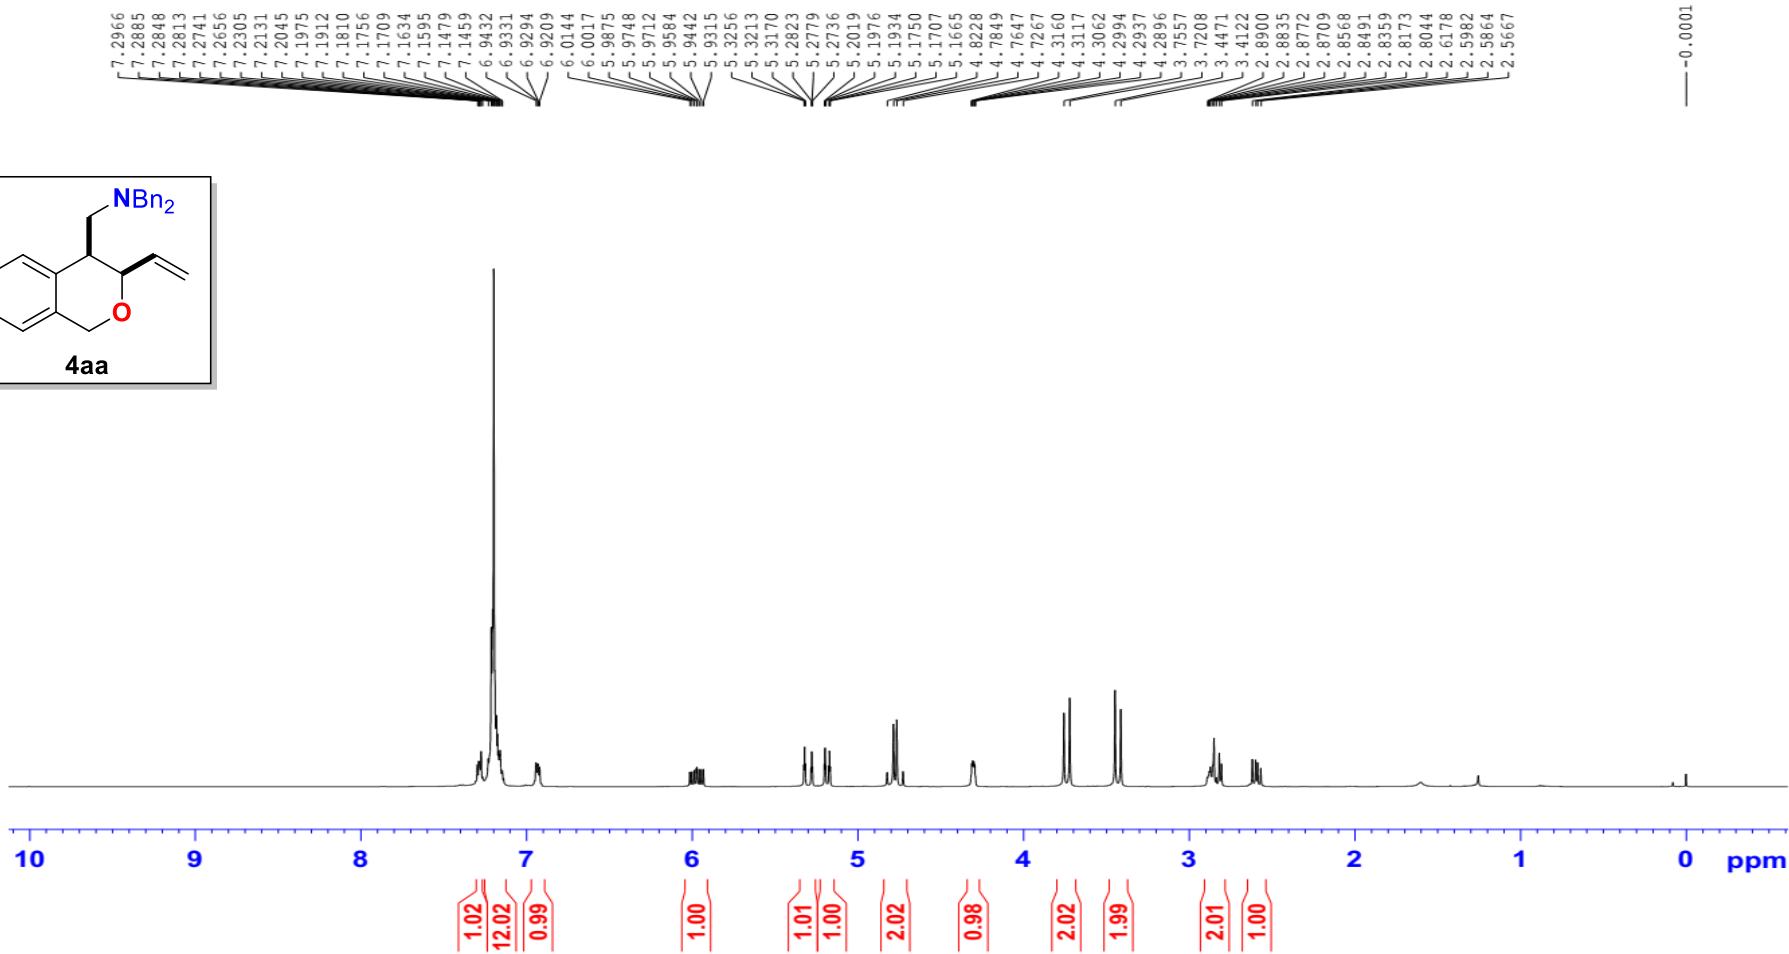

hy-P-4aa <sup>13</sup>C NMR (100MHz CDCl<sub>3</sub>)

hy-biaoliuup-2-

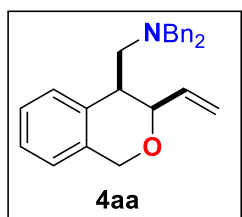

139.2  
137.4  
137.0  
133.8  
130.1  
128.7  
128.1  
126.7  
126.3  
125.6  
123.8  
115.1

77.3  
77.2  
77.0  
76.7

67.8

58.8

55.6

40.4

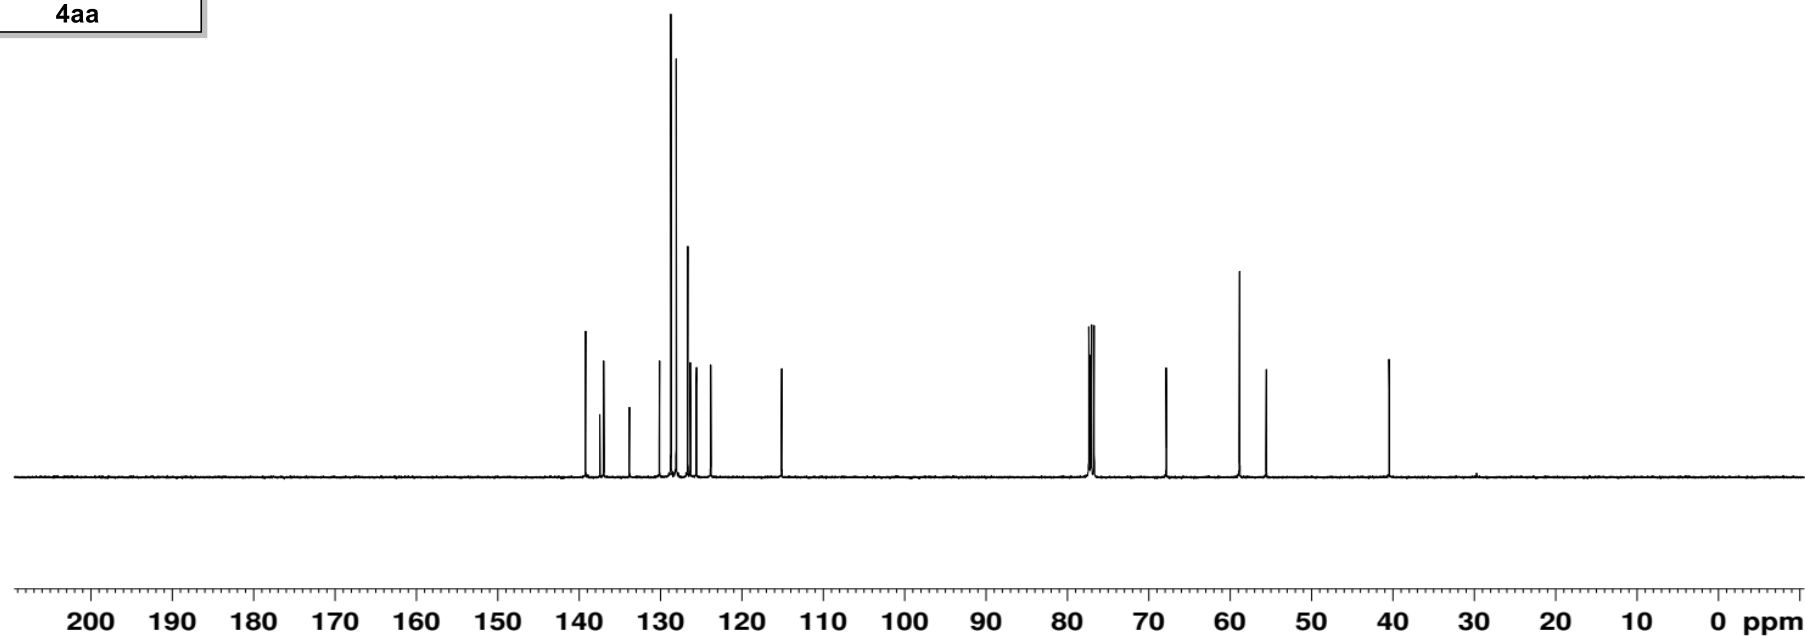

hy-P-4ab <sup>1</sup>H NMR (400MHz CDCl<sub>3</sub>)

YXY-X200706-3-1 Me-up-HNMR in CDCl<sub>3</sub>

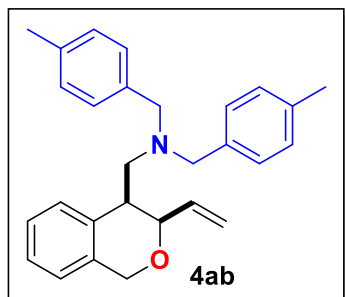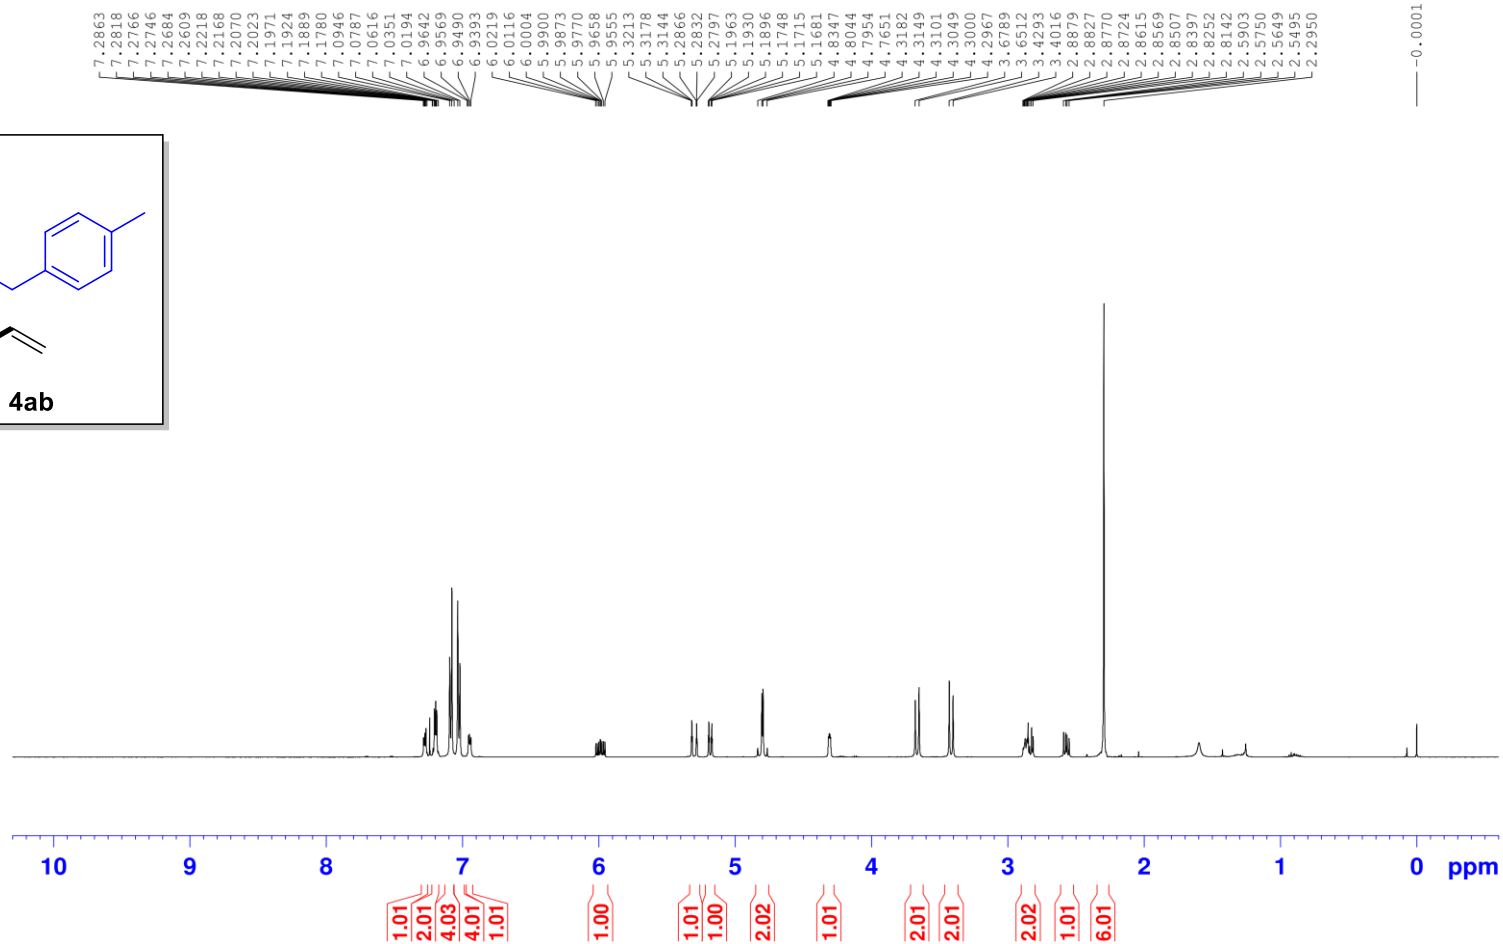

hy-P-4ab <sup>13</sup>C NMR (100MHz CDCl<sub>3</sub>)

YXY-X200706-3-1 Me-up-CNMR in CDCl<sub>3</sub>

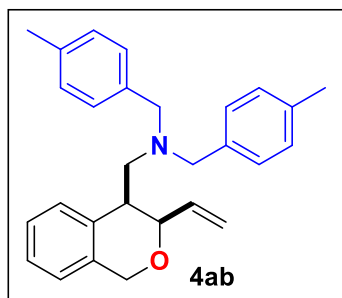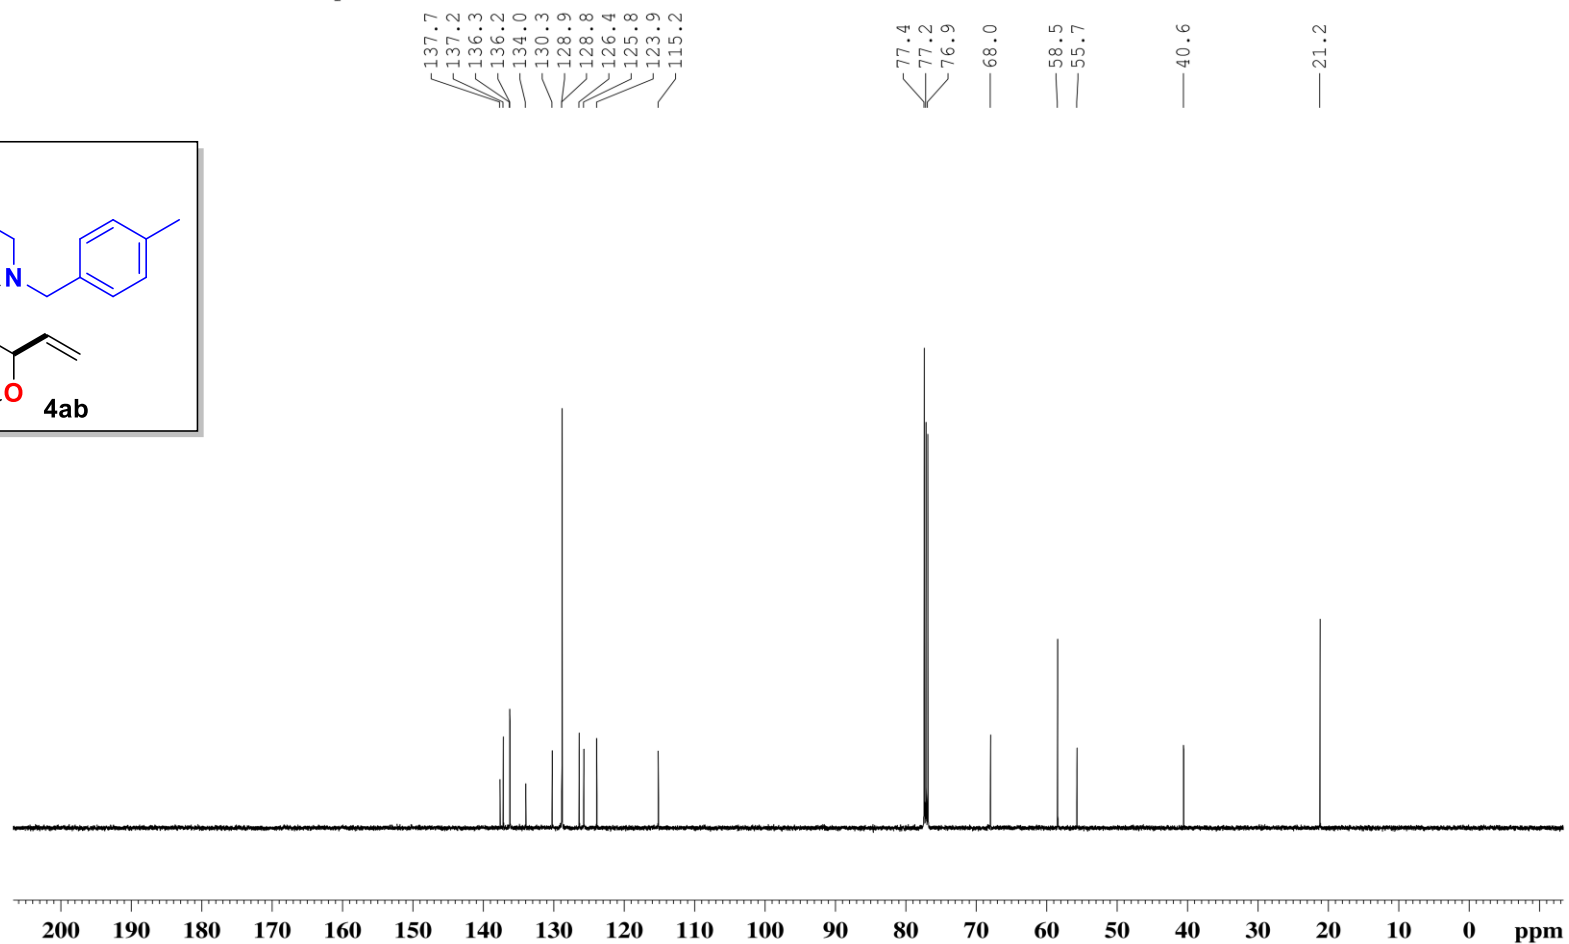

hy-P-4ac <sup>1</sup>H NMR (500MHz CDCl<sub>3</sub>)

YXY-X200706-3-2 Bu-up-HNMR in CDCl<sub>3</sub>

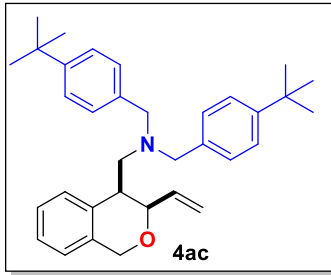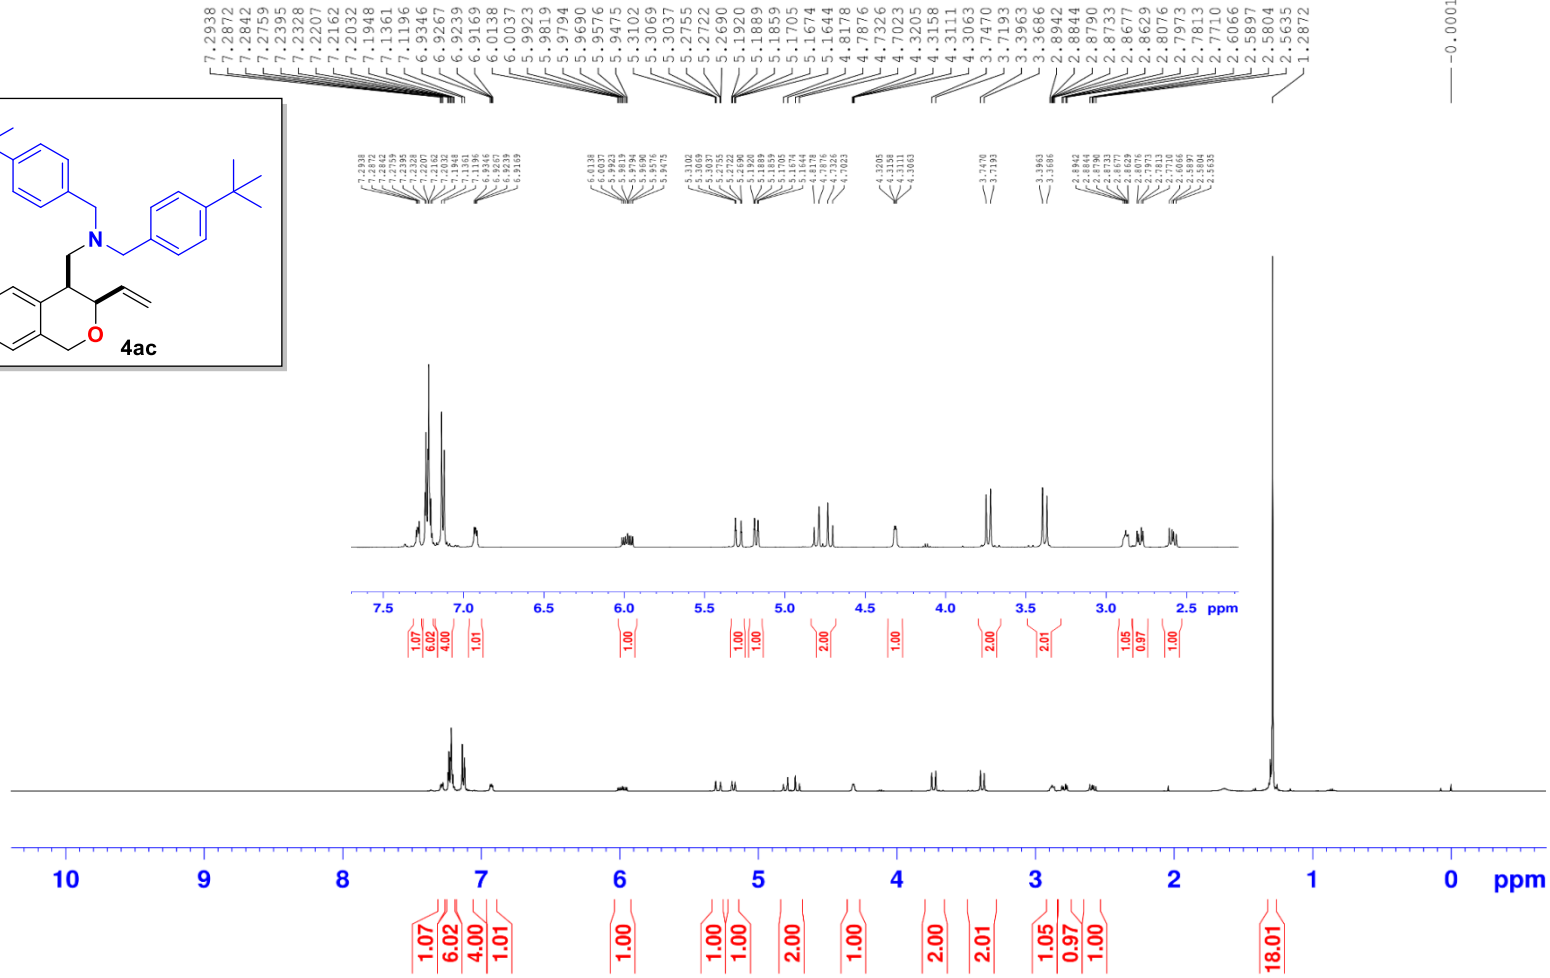

hy-P-4ac <sup>13</sup>C NMR (125MHz CDCl<sub>3</sub>)

YXY-X200706-3-2 Bu-up-CNMR in CDCl<sub>3</sub>

149.5  
137.7  
137.1  
136.4  
133.9  
130.4  
128.6  
126.4  
125.7  
125.0  
123.9  
115.3

77.4  
77.3  
77.2  
76.9  
67.9

58.5  
55.4

40.7  
34.5  
31.5

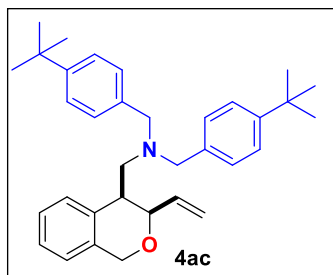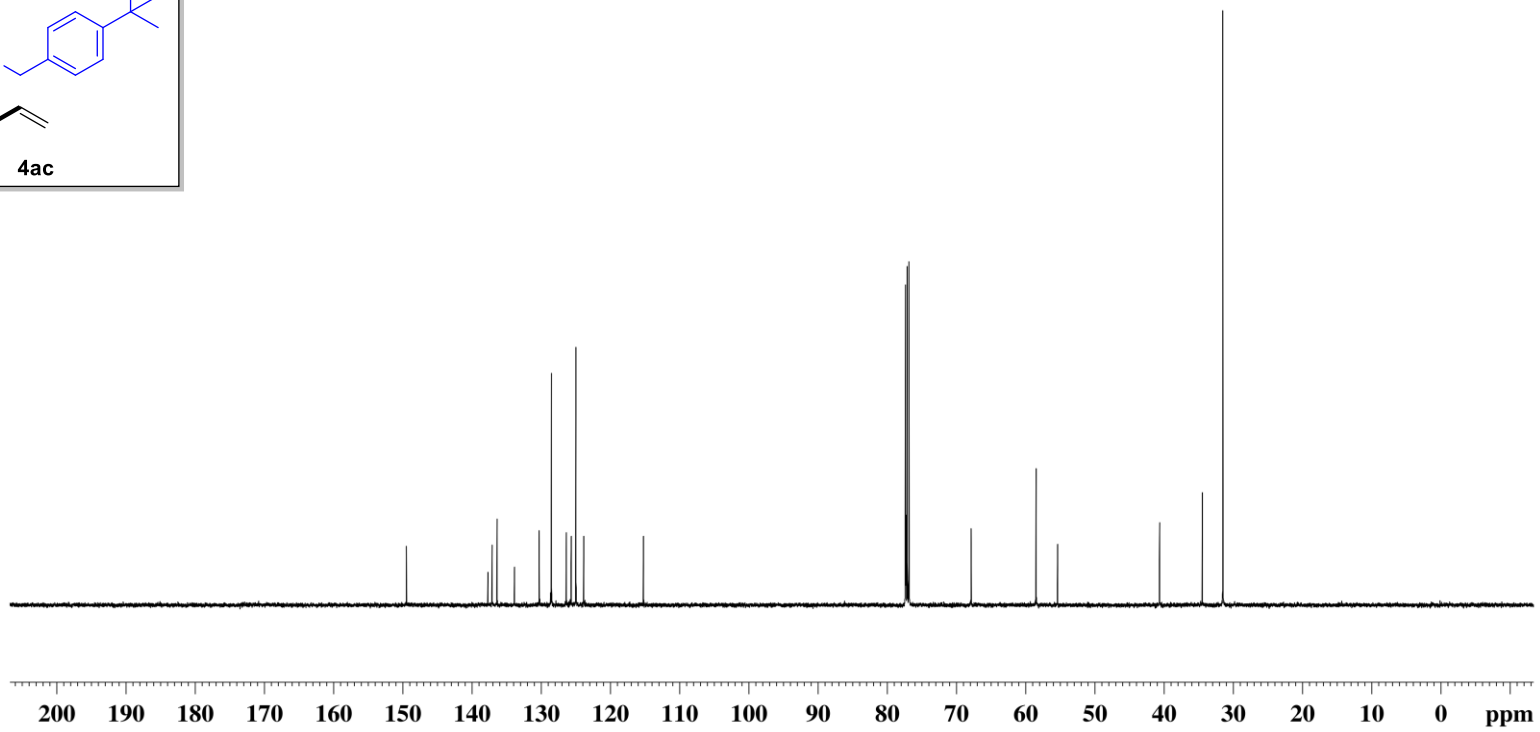

hy-P-4ad <sup>1</sup>H NMR (400MHz CDCl<sub>3</sub>)

YXY-X200706-3-3-OMe-HNMR in CDCl<sub>3</sub>

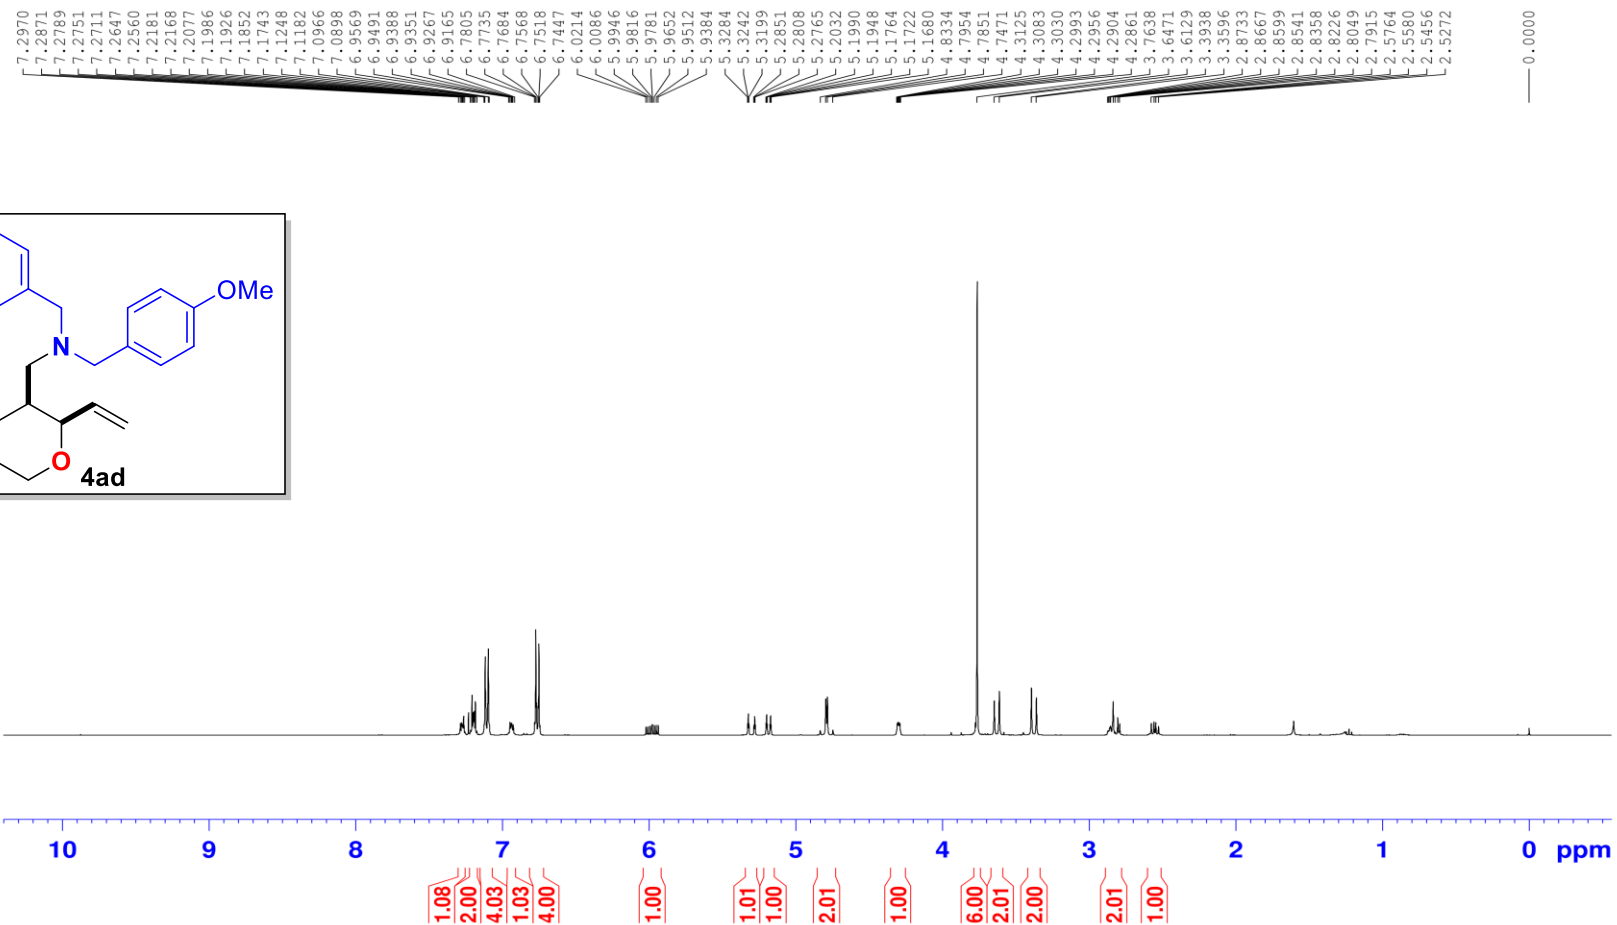



hy-P-4ad <sup>13</sup>C NMR (125MHz CDCl<sub>3</sub>)

YXY-X200706-3-3-OMe-CNMR in CDCl<sub>3</sub>

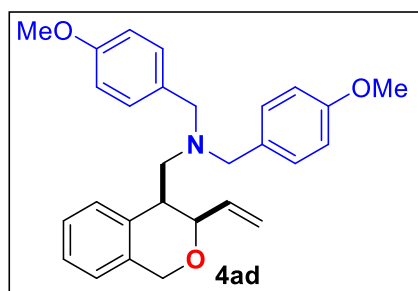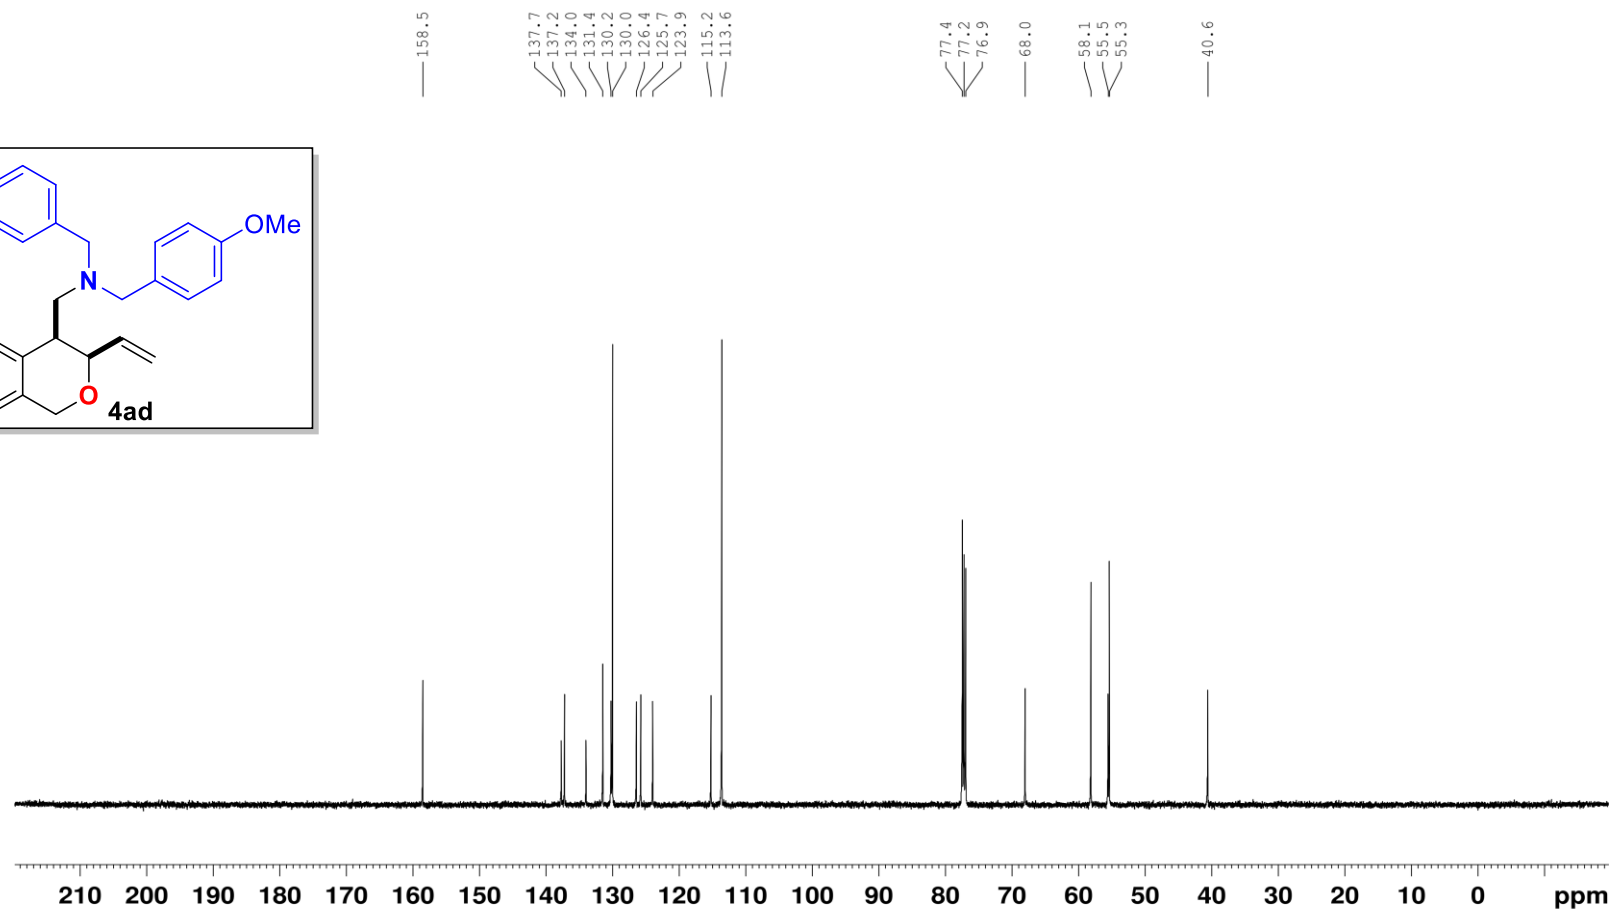

hy-P-4ae <sup>1</sup>H NMR (500MHz CDCl<sub>3</sub>)

yxy-x200706-3-4f-2

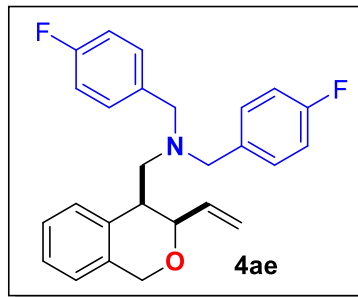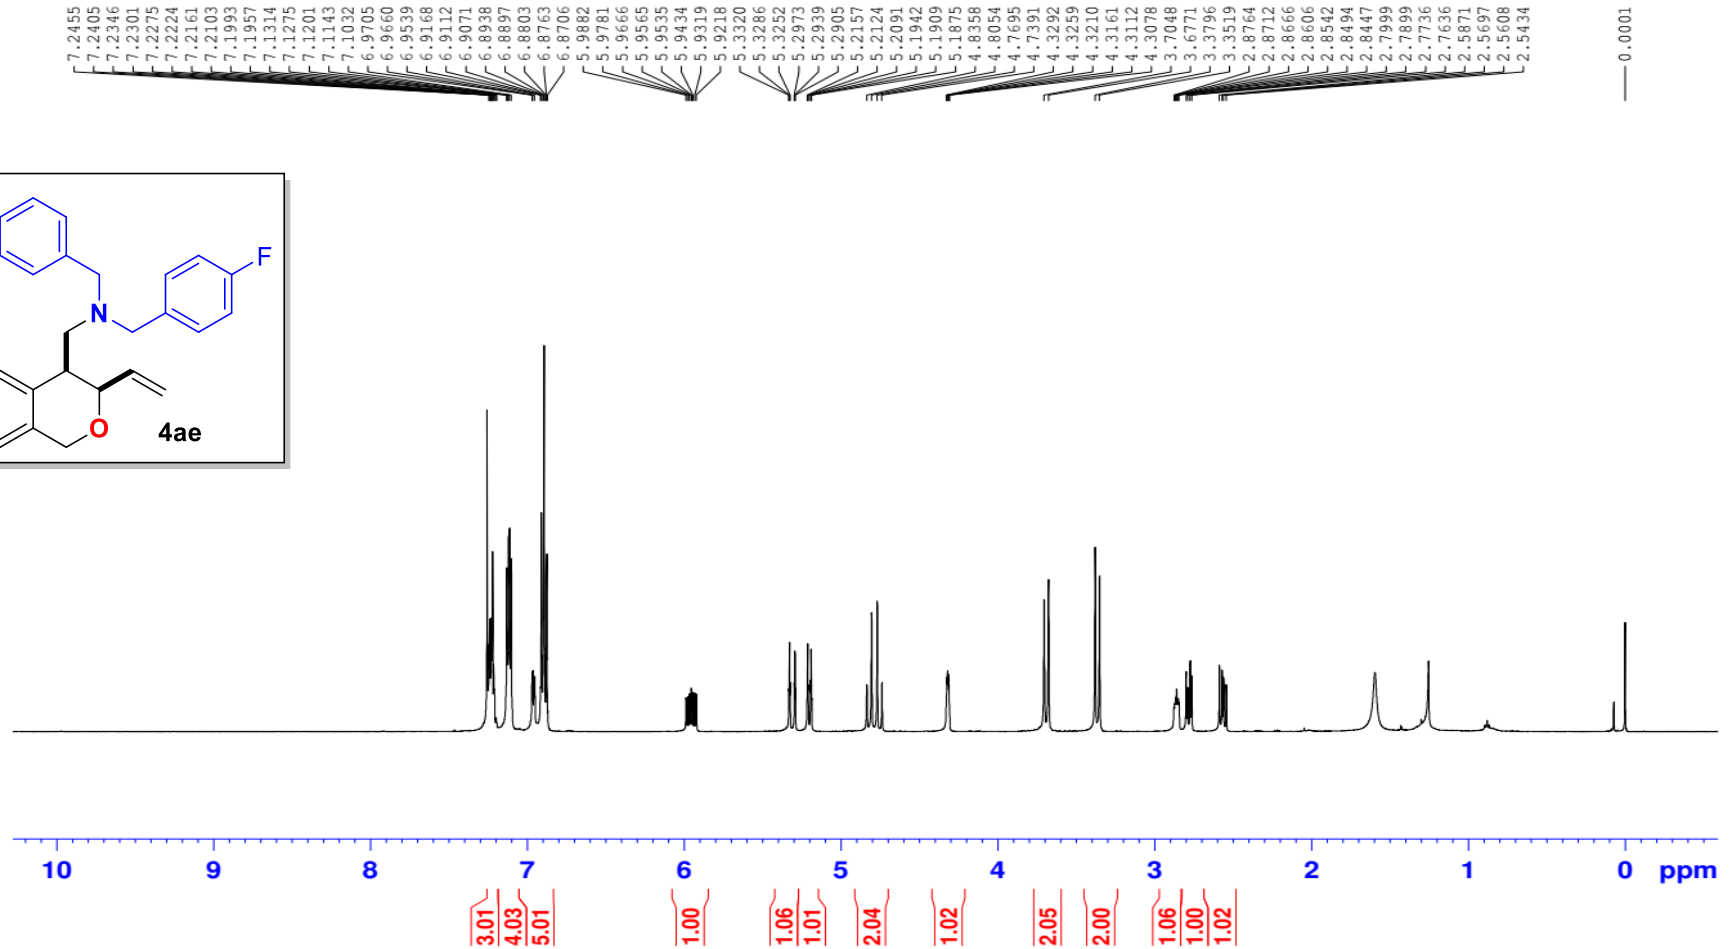

hy-P-4ae <sup>13</sup>C NMR (125MHz CDCl<sub>3</sub>)

yxy-x200706-3-4f-2-c

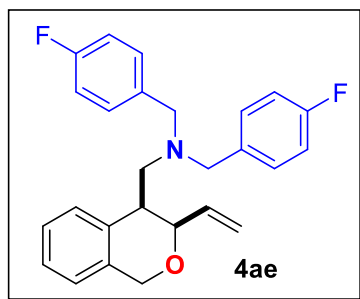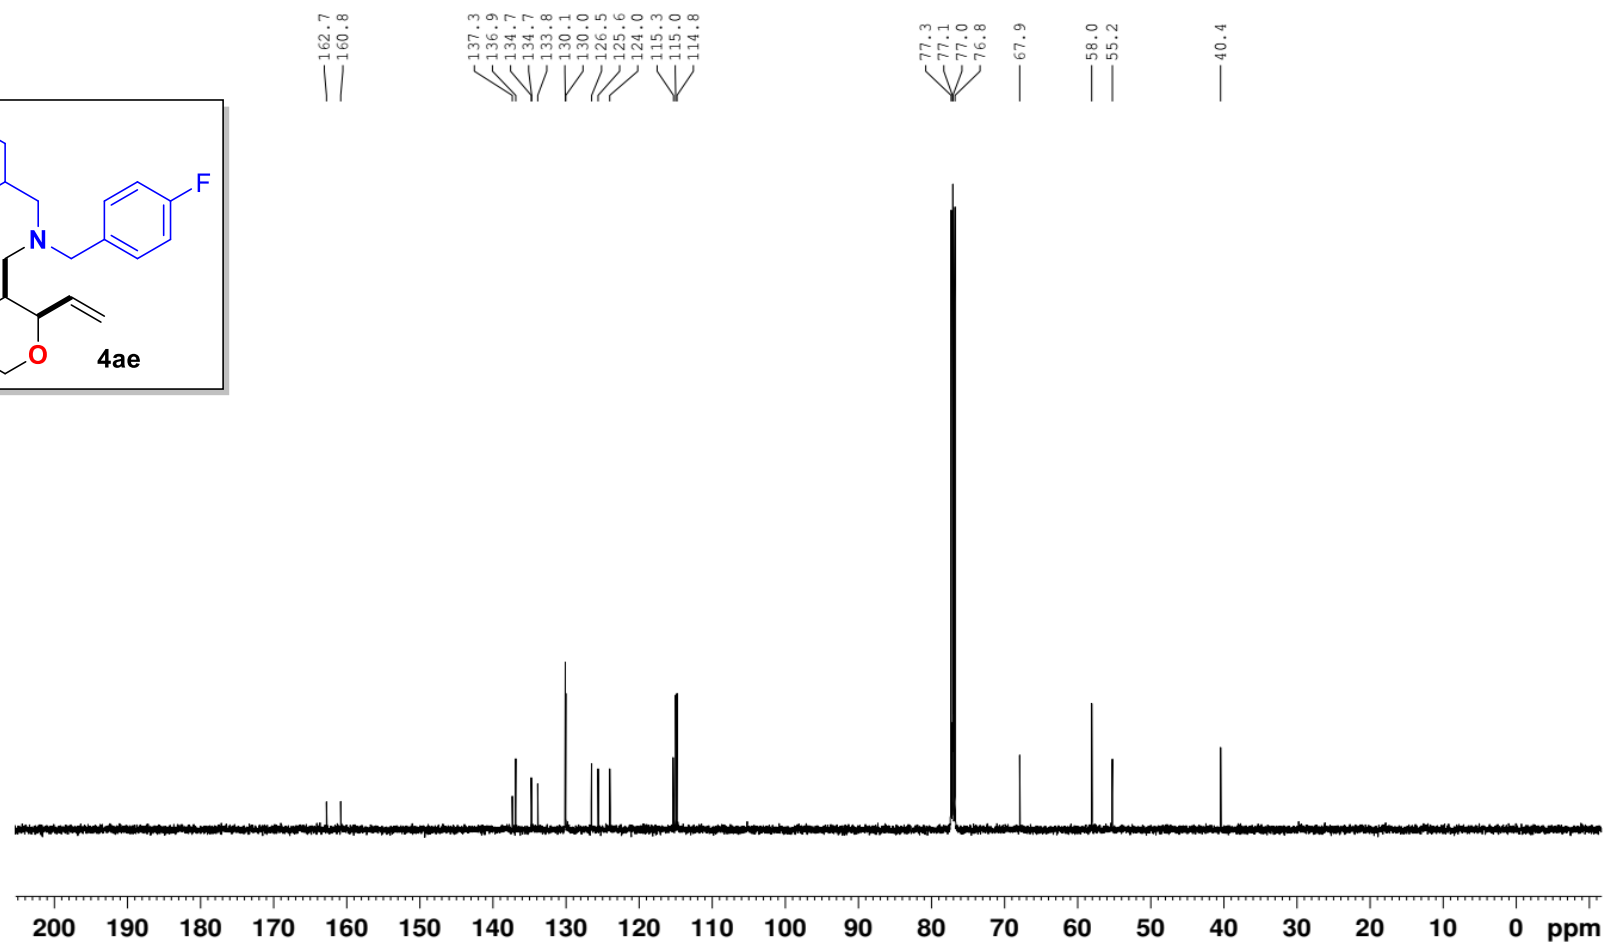

hy-P-4ae <sup>19</sup>F NMR (376MHz CDCl<sub>3</sub>)

YXY-X200706-3-4-4F-up-FNMR in CDCl<sub>3</sub>

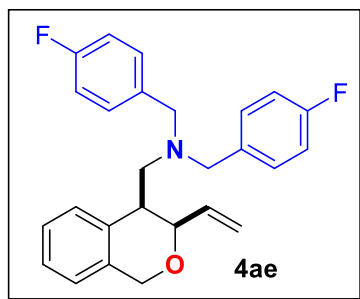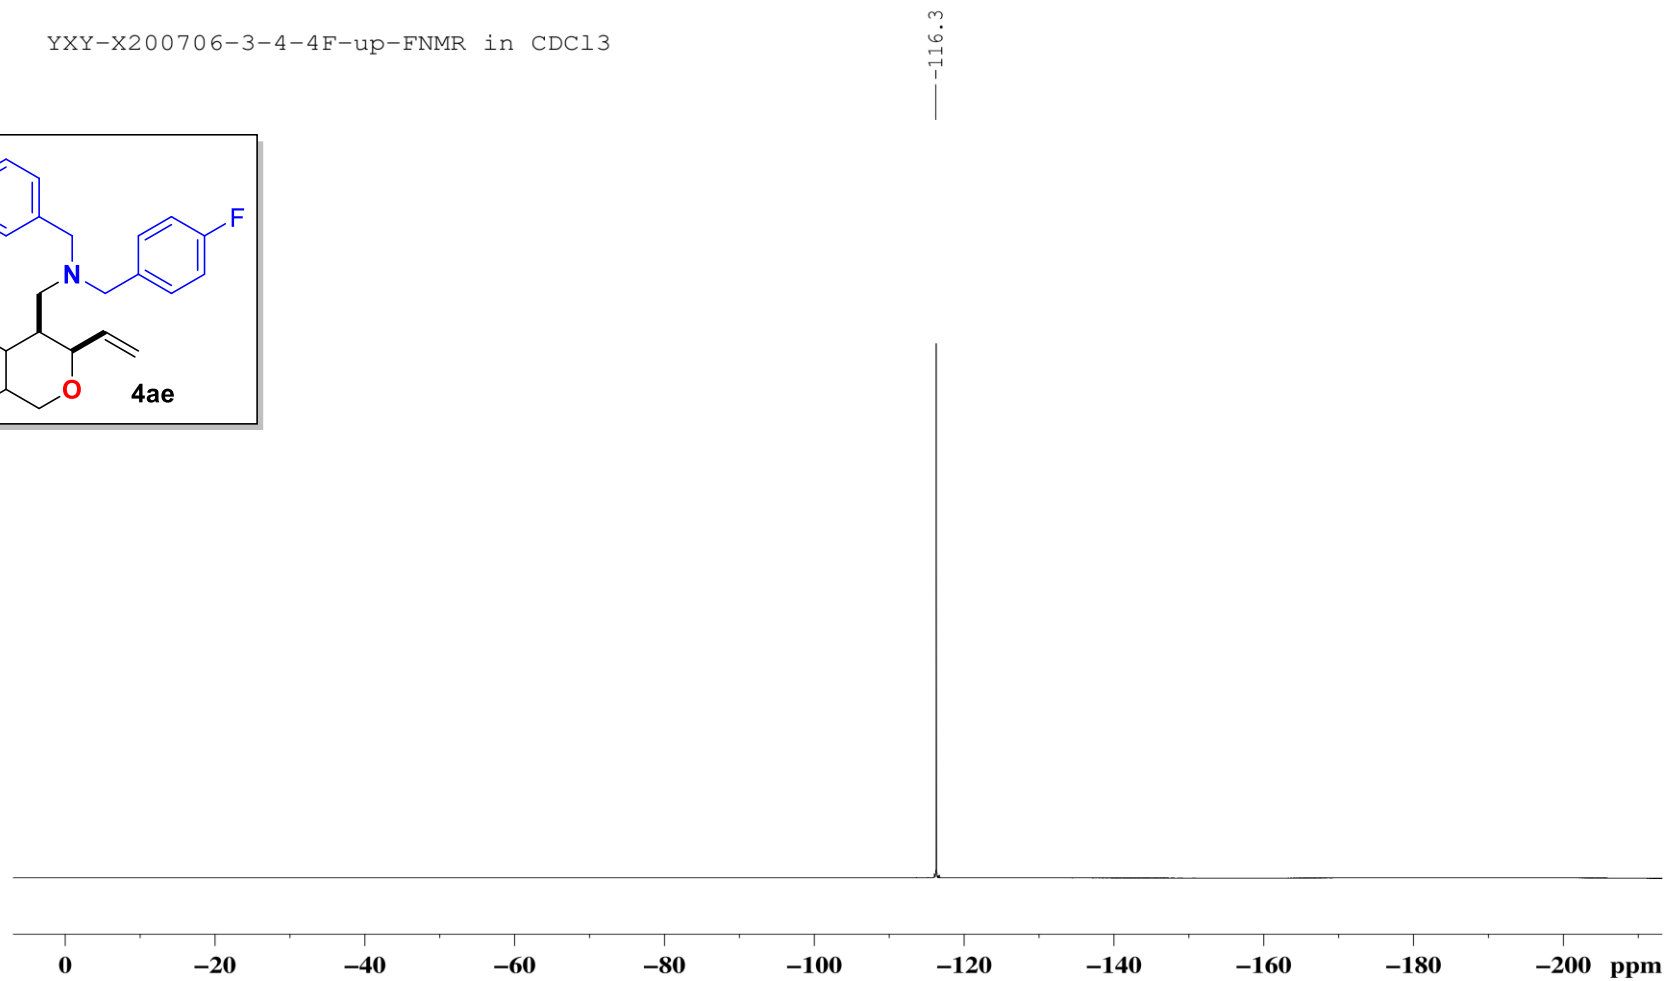

hy-P-4af <sup>1</sup>H NMR (500MHz CDCl<sub>3</sub>)

YXY-X200706-3-5-3F-up-HNMR in CDCl<sub>3</sub>

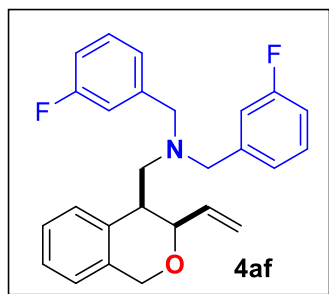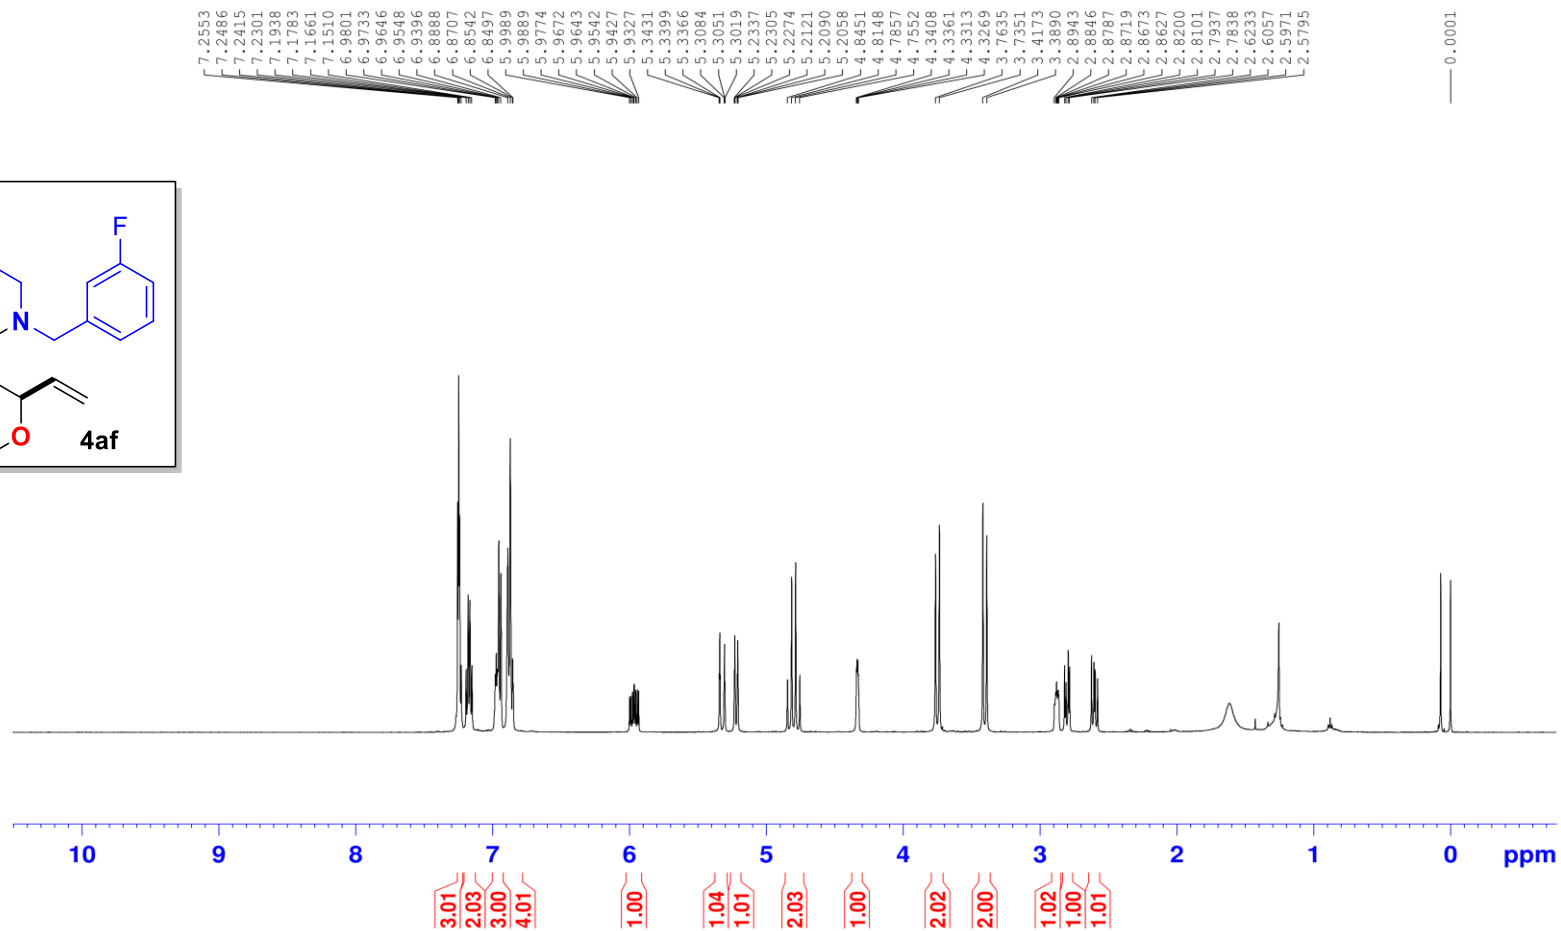

hy-P-4af <sup>13</sup>C NMR (125MHz CDCl<sub>3</sub>)

yxy-x200706-3-5-3f-up-c-

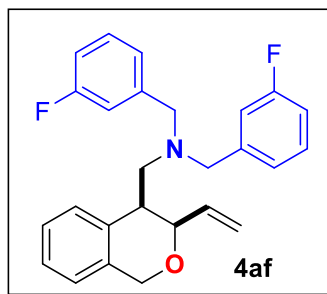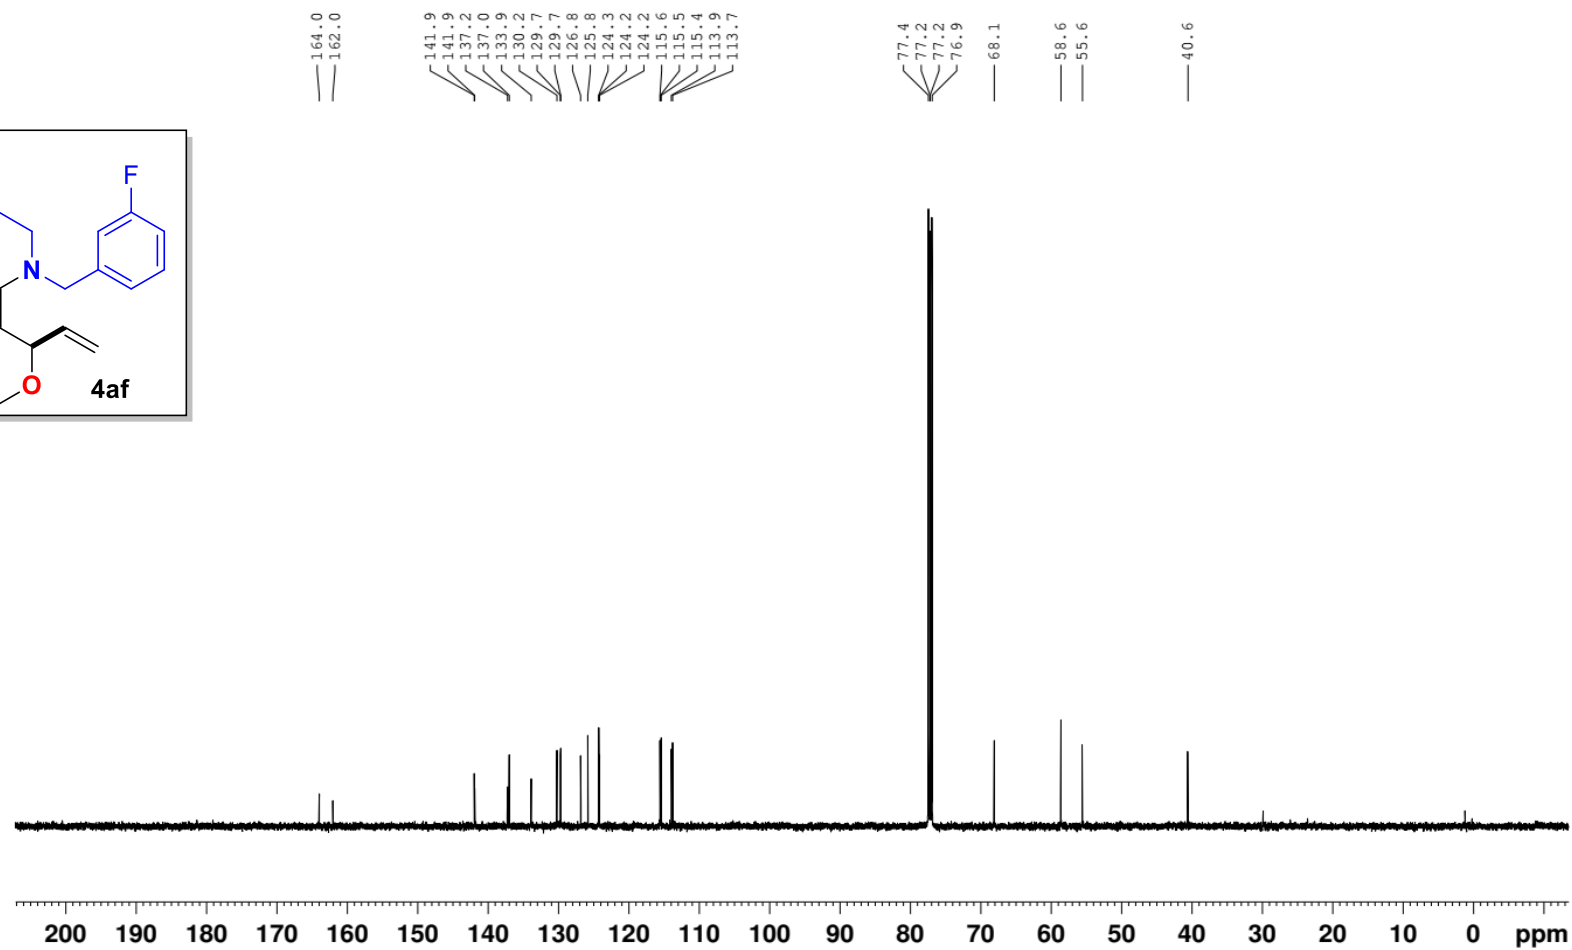

hy-P-4af <sup>19</sup>F NMR (470MHz CDCl<sub>3</sub>)

YXY-X200706-3-5-3F-up-FNMR in CDCl<sub>3</sub>

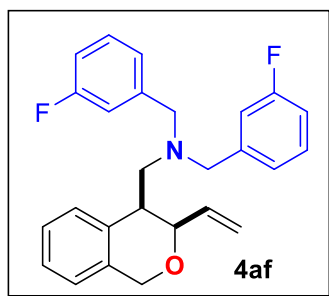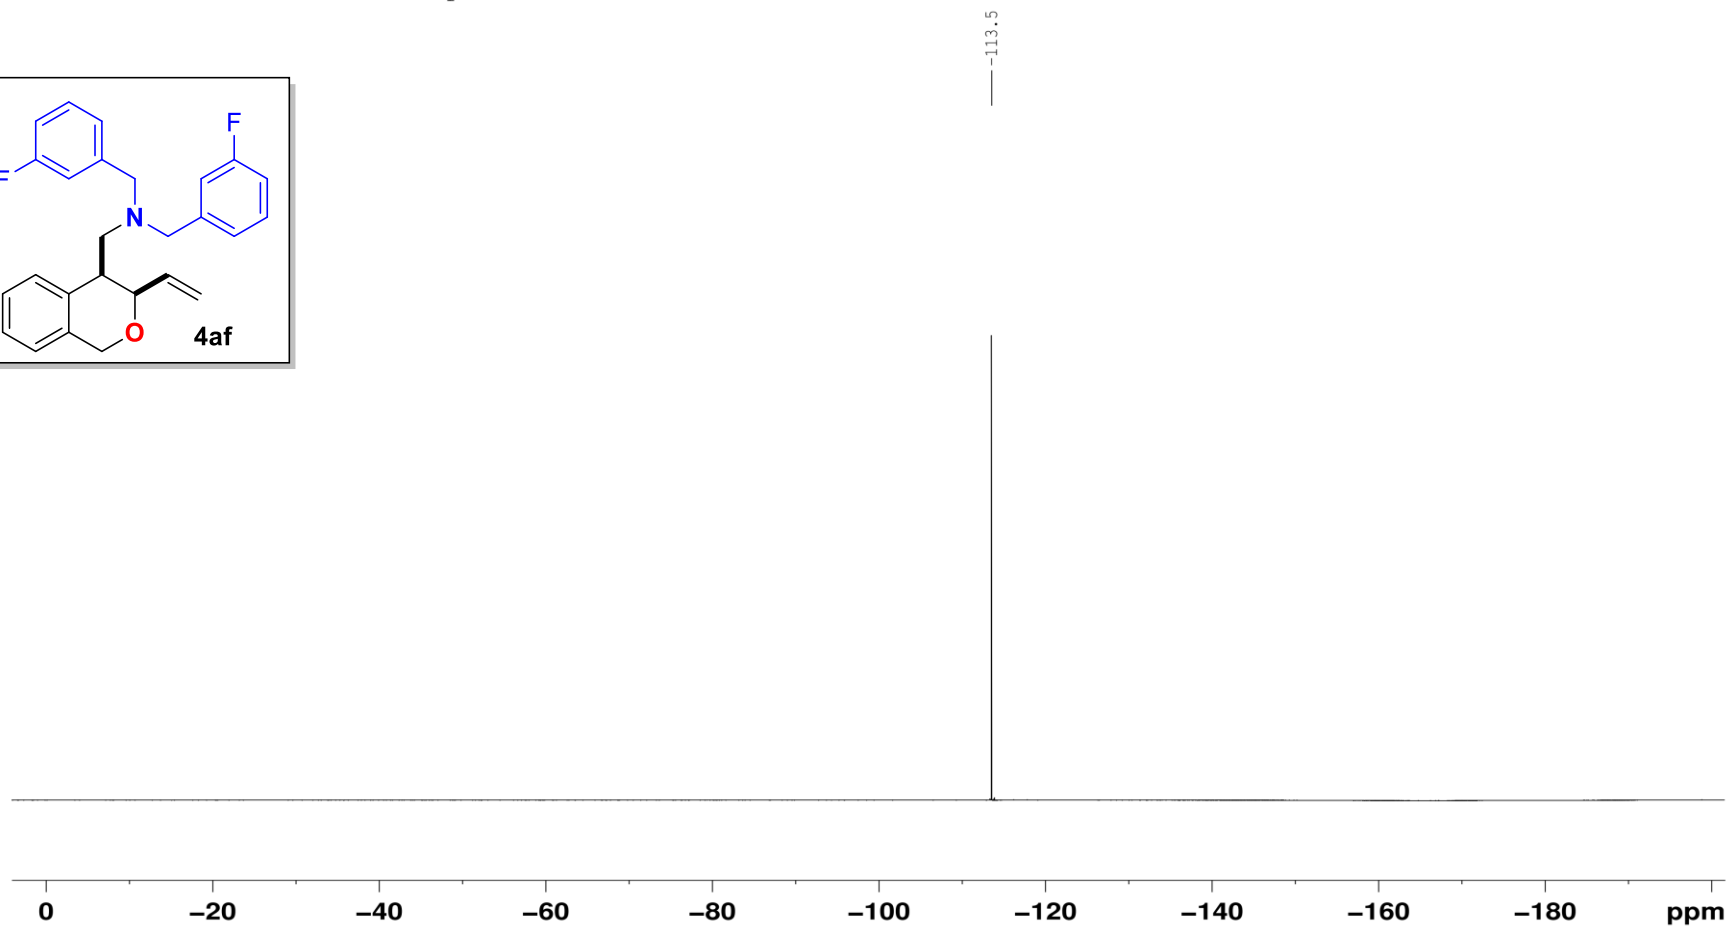

hy-P-4ag <sup>1</sup>H NMR (400MHz CDCl<sub>3</sub>)

yxy-x200706-3-6-2f-2-h-

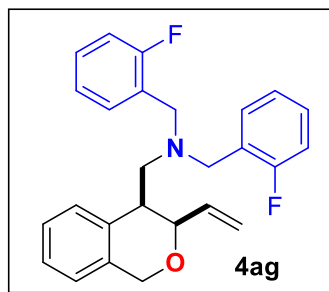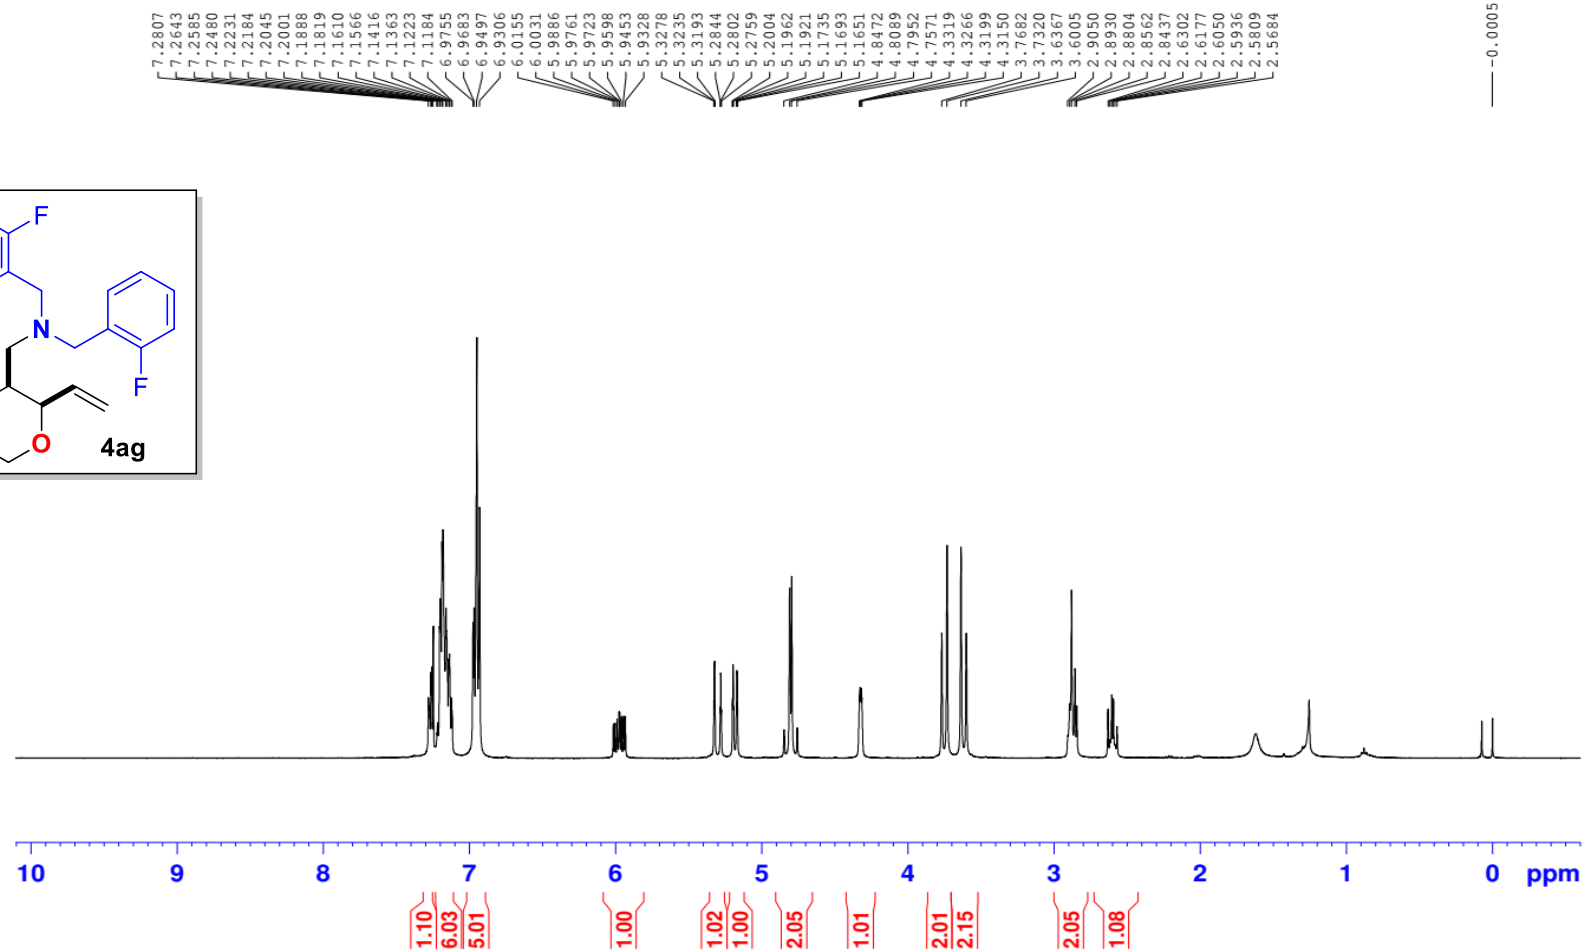



hy-P-4ag <sup>13</sup>C NMR (125MHz CDCl<sub>3</sub>)

YXY-X200706-3-6-2F-up-CNMR in CDCl<sub>3</sub>

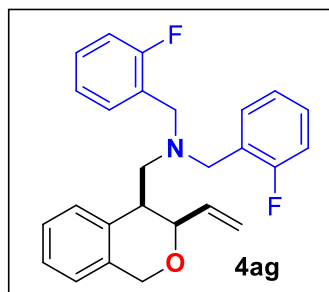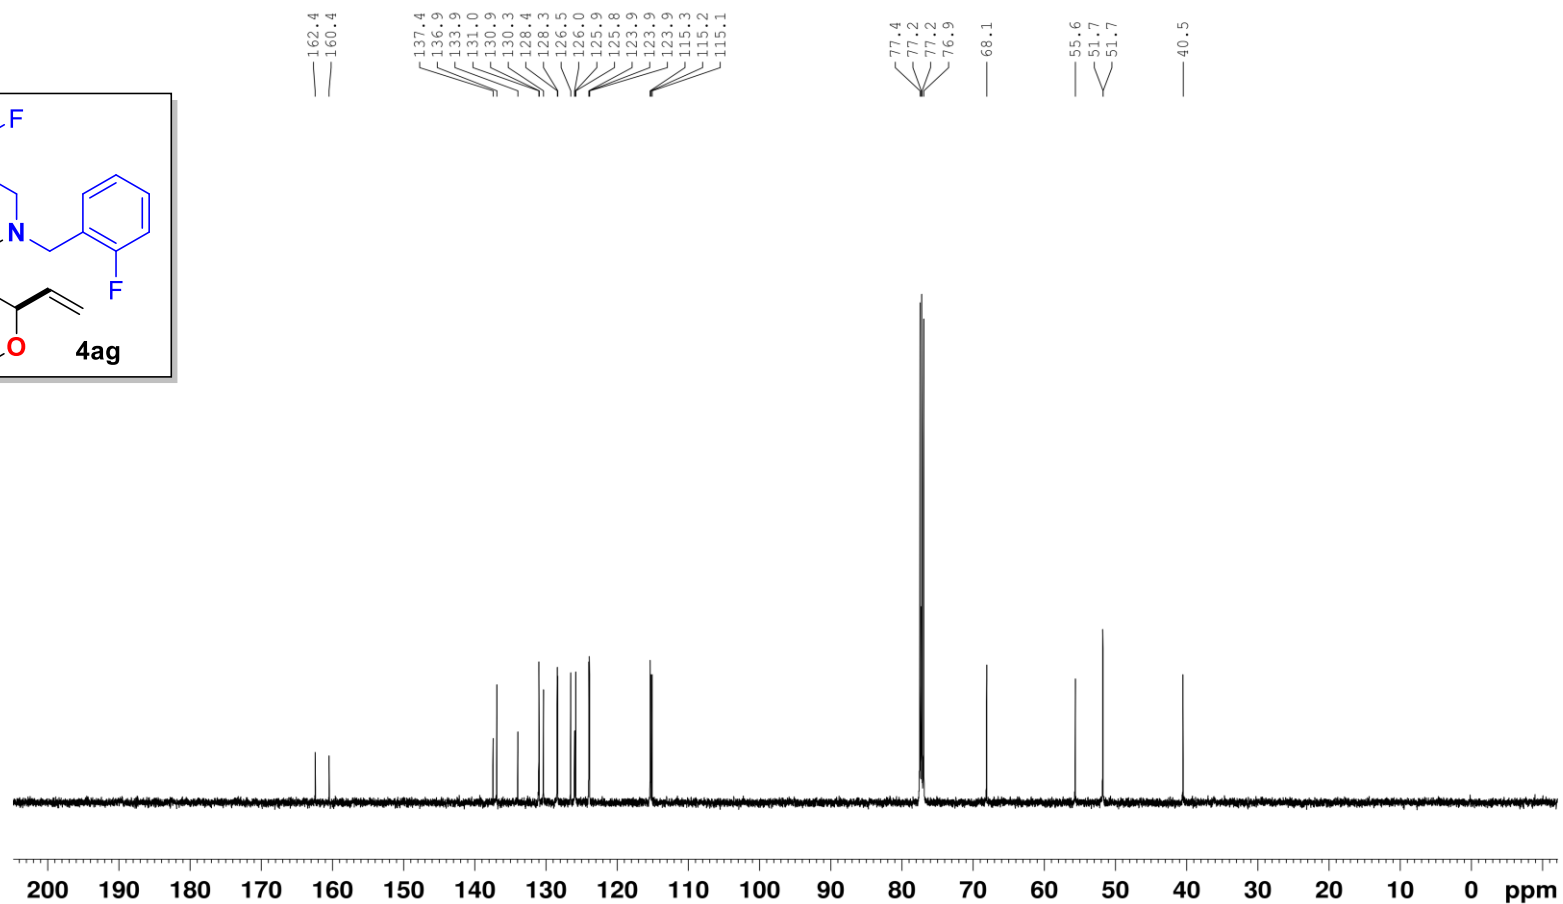

hy-P-4ag <sup>19</sup>F NMR (470MHz CDCl<sub>3</sub>)

YXY-X200706-3-6-2F-up-FNMR in CDCl<sub>3</sub>

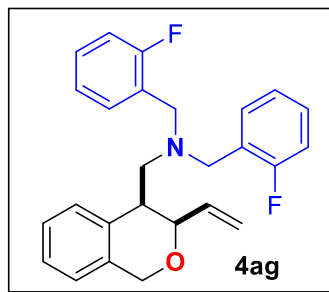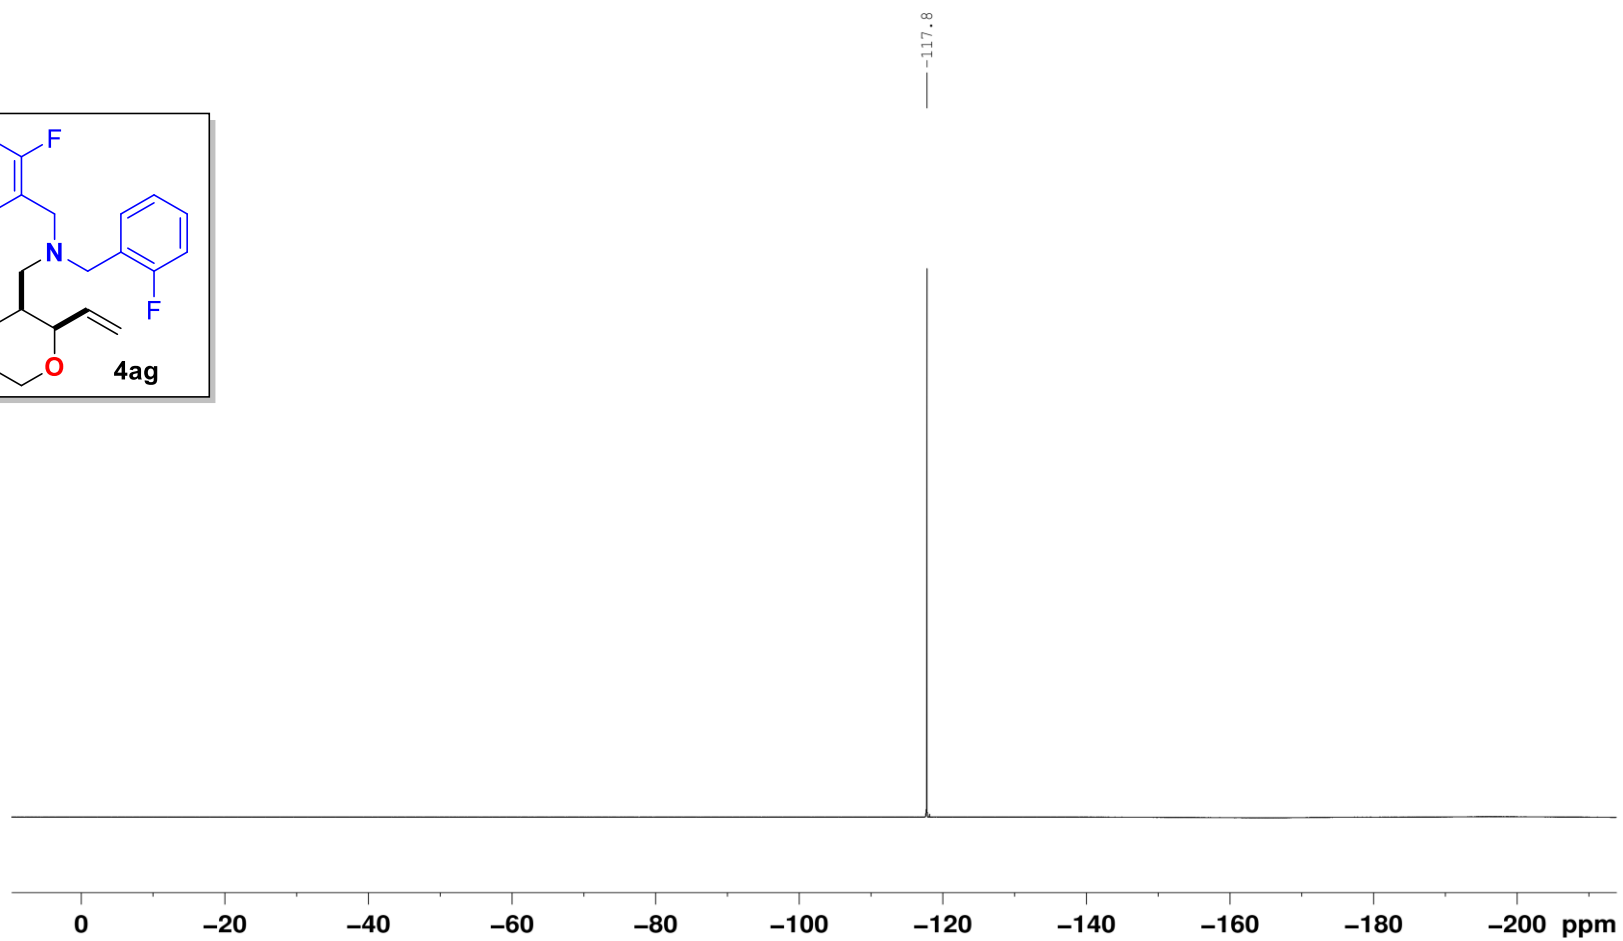

hy-P-4ah <sup>1</sup>H NMR (500MHz CDCl<sub>3</sub>)

YXY-X200706-3-7-Cl-up-HNMR in CDCl<sub>3</sub>

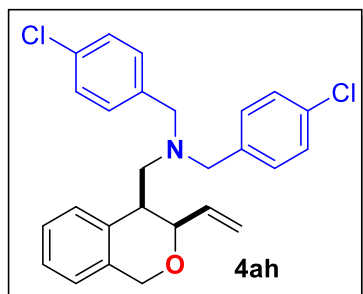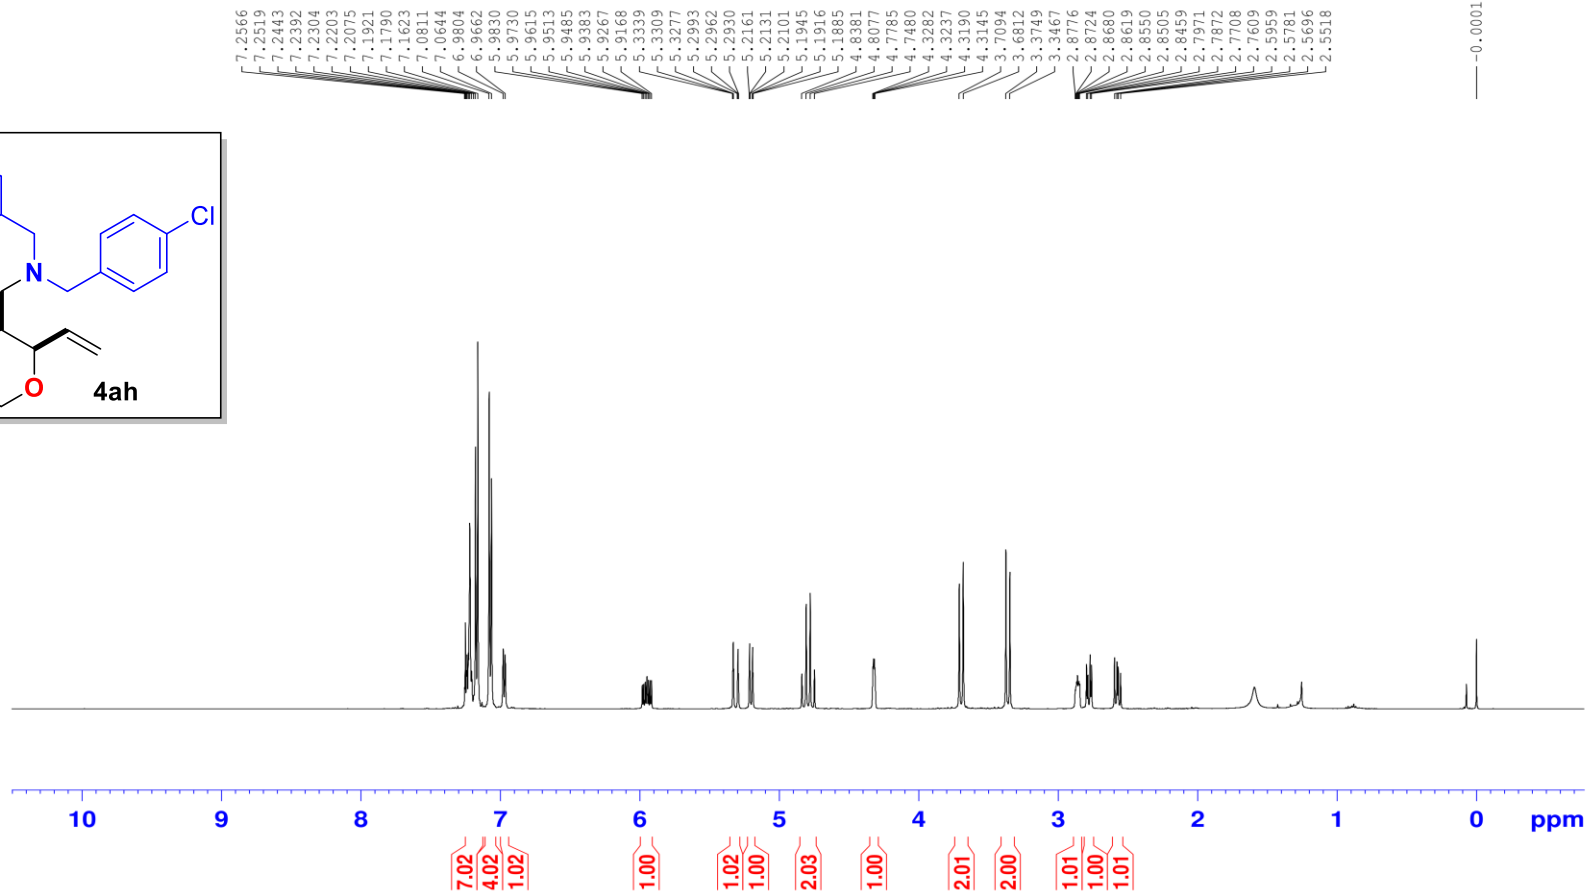

hy-P-4ah <sup>13</sup>C NMR (125MHz CDCl<sub>3</sub>)

YXY-X200706-3-7-Cl-up-CNMR in CDCl<sub>3</sub>

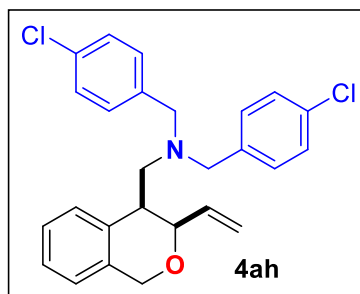

137.6  
137.3  
137.0  
134.0  
132.5  
130.2  
130.0  
128.4  
126.7  
125.7  
124.1  
115.5

77.4  
77.2  
76.9  
68.0  
58.2  
55.4  
40.5

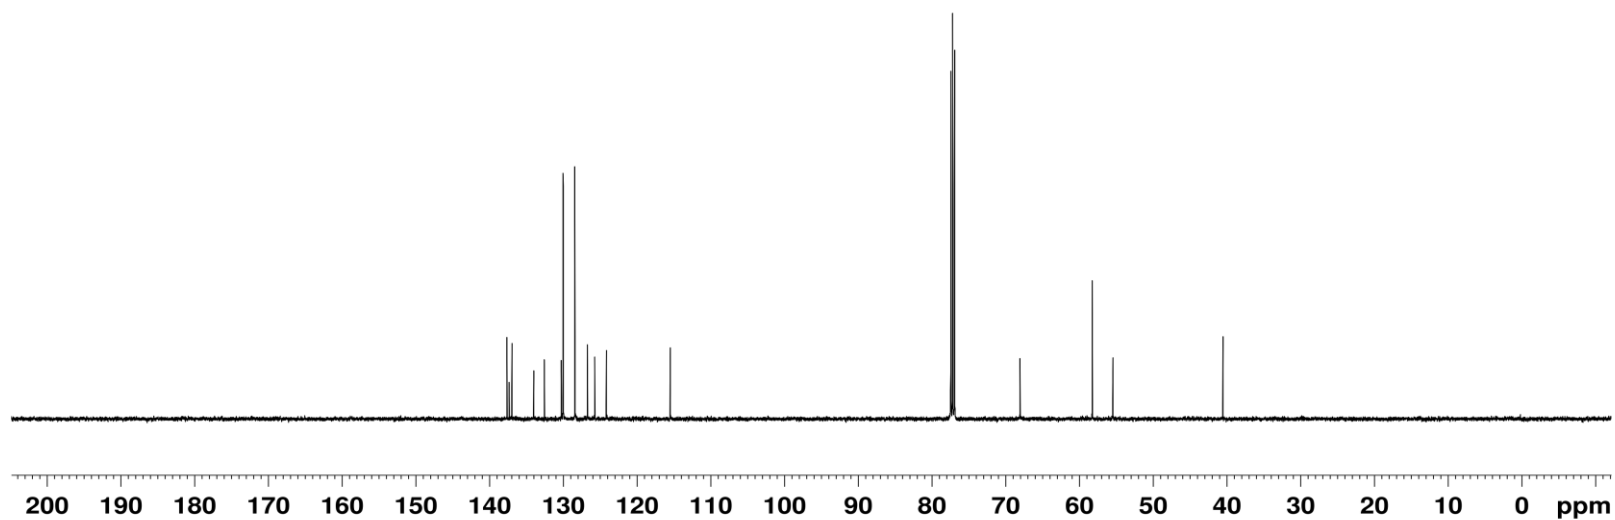

hy-cis-aminal-br-3

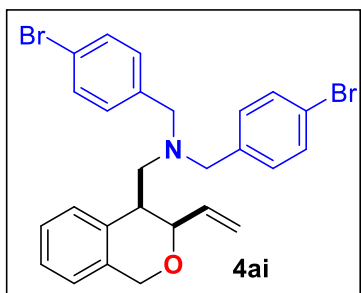

hy-P-4ai <sup>1</sup>H NMR (400MHz CDCl<sub>3</sub>)

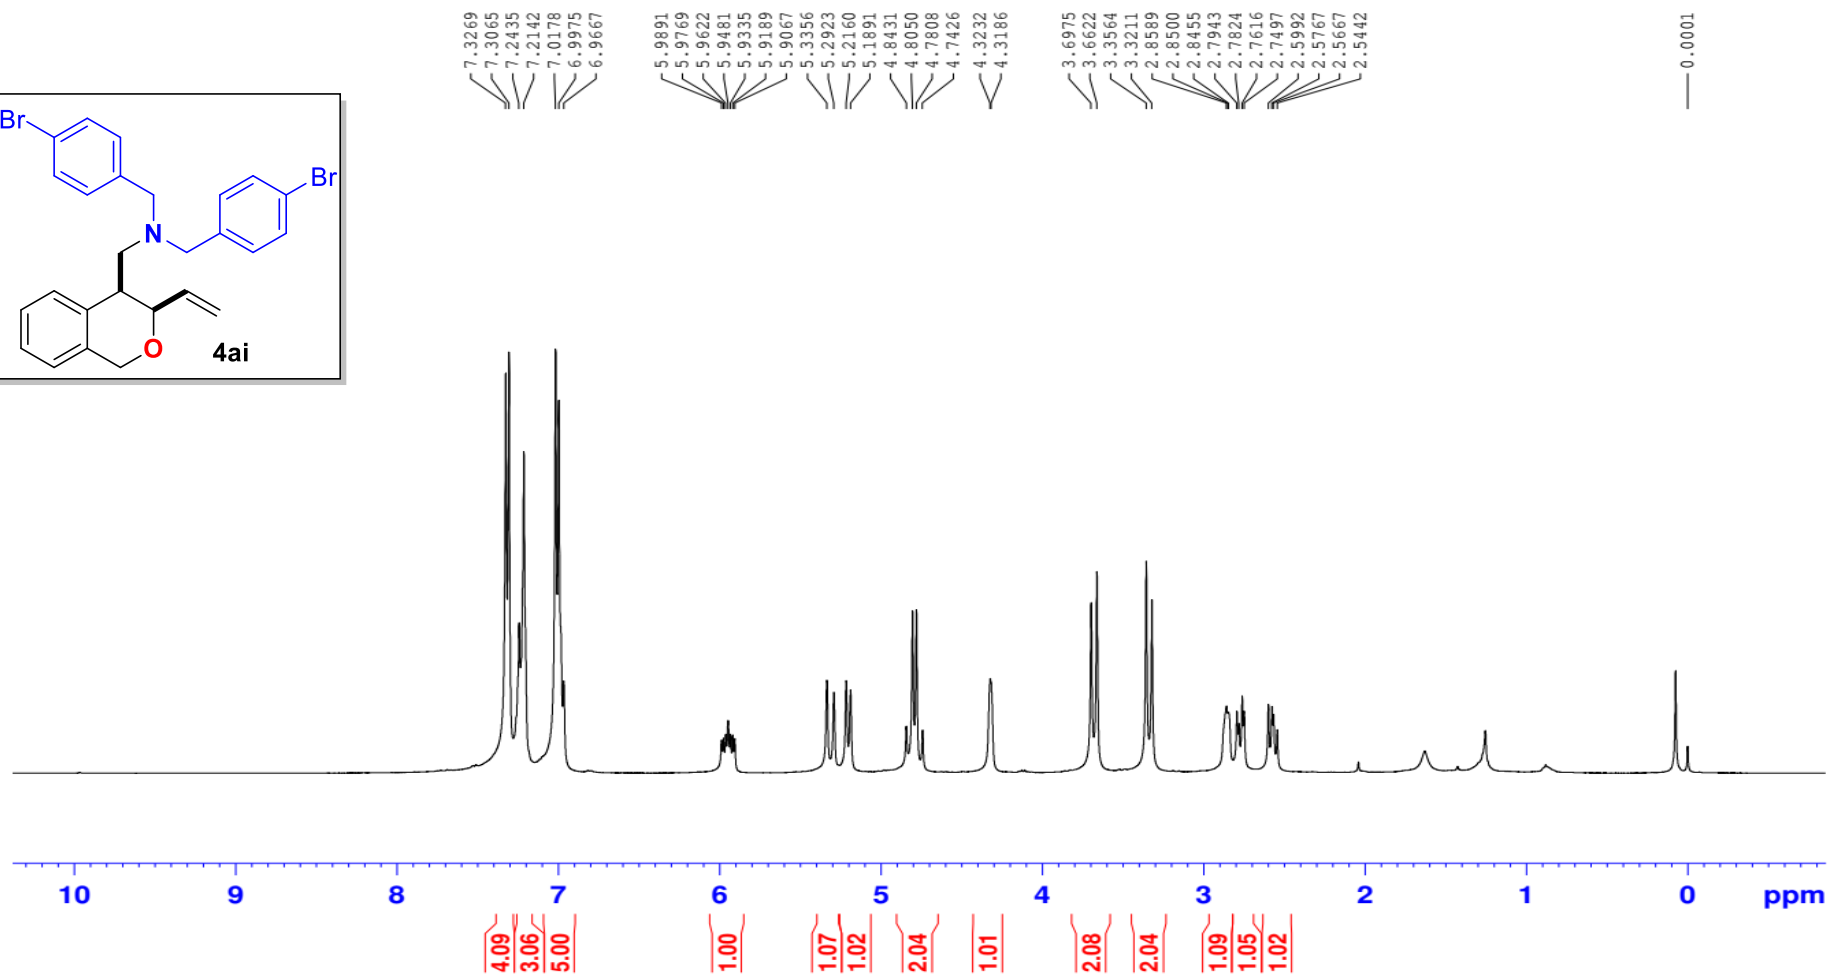

hy-P-4ai <sup>13</sup>C NMR (100MHz CDCl<sub>3</sub>)

YXY-X200710-1-Br-up-CNMR in CDCl<sub>3</sub>

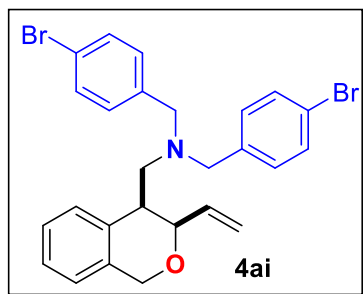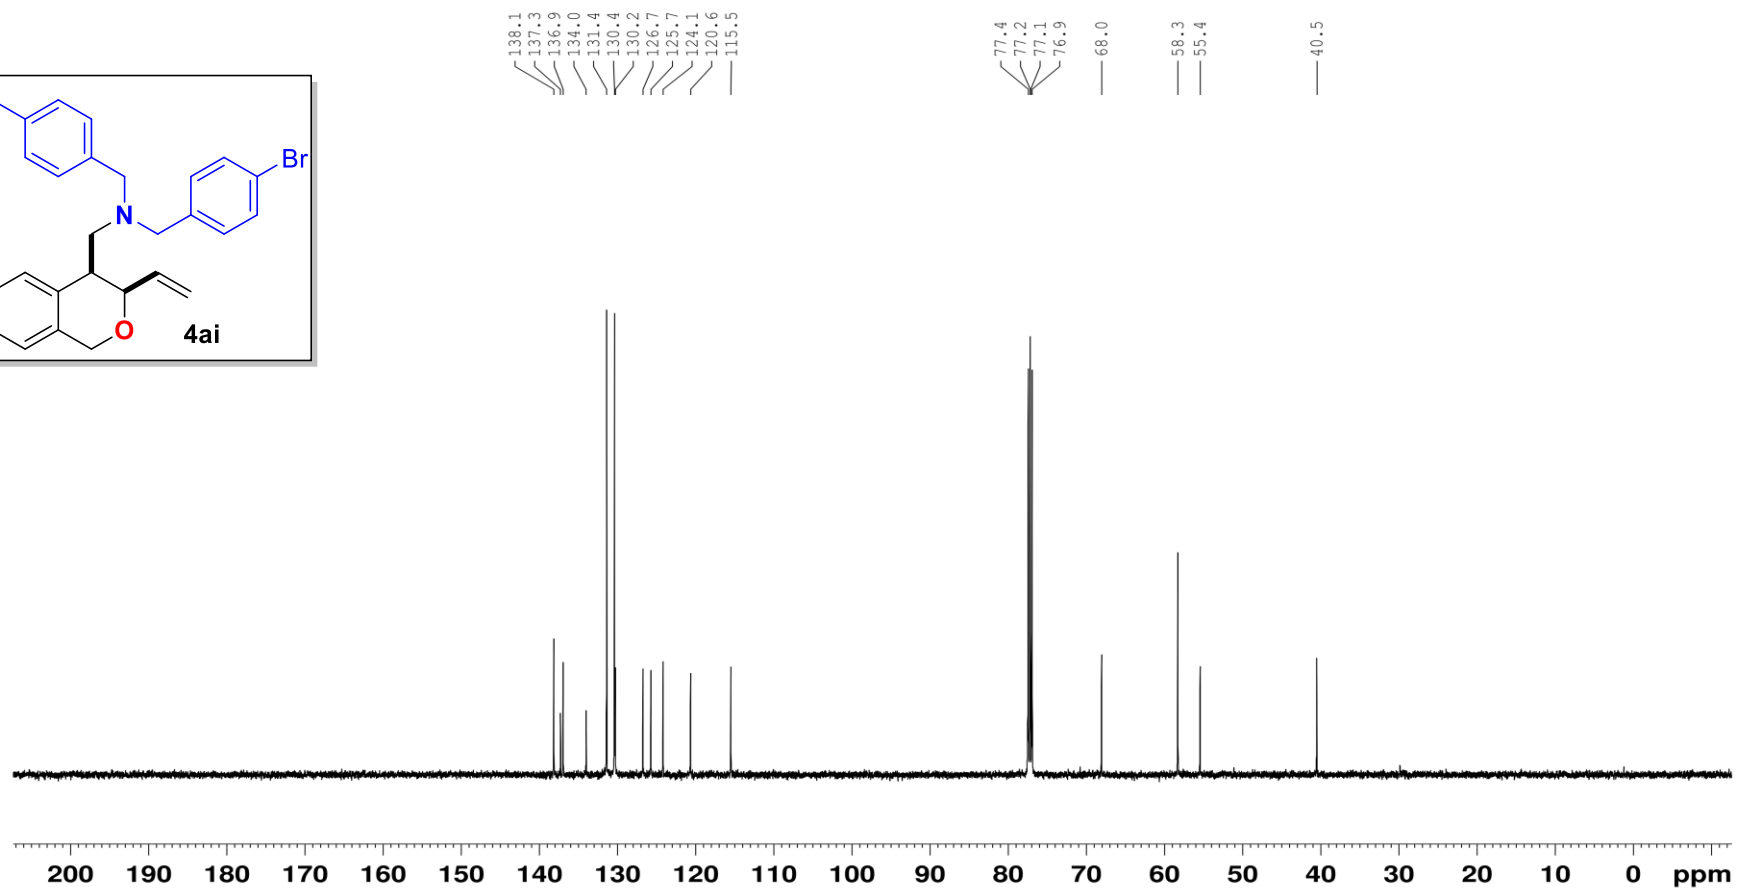

hy-3aa-aminal-p-cf3

hy-P-4aj <sup>1</sup>H NMR (500MHz CDCl<sub>3</sub>)

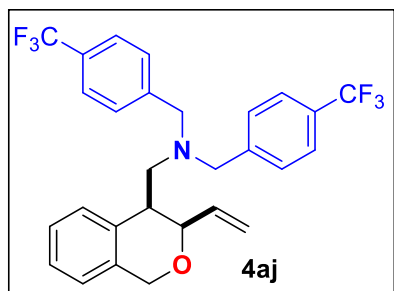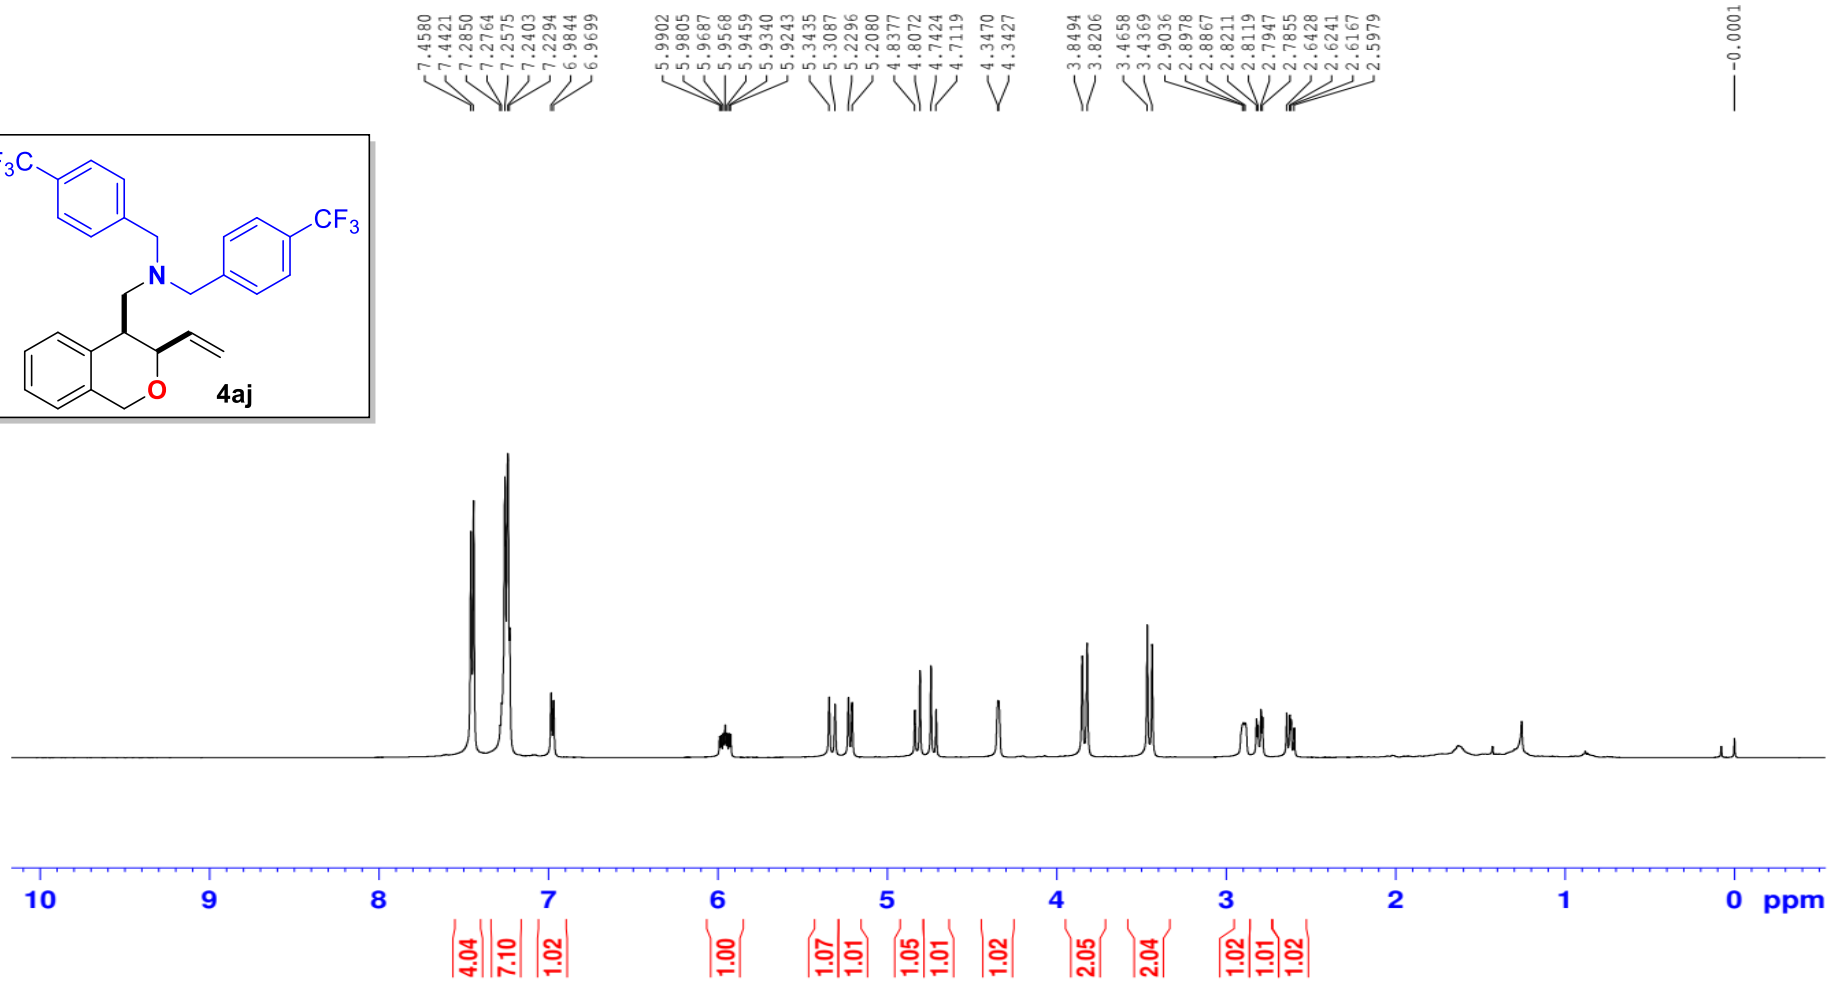

hy-P-4aj <sup>13</sup>C NMR (125MHz CDCl<sub>3</sub>)

hy-3aa-aminal-cf3-c---

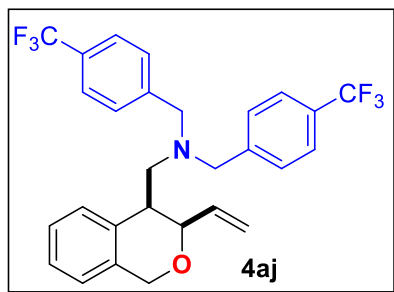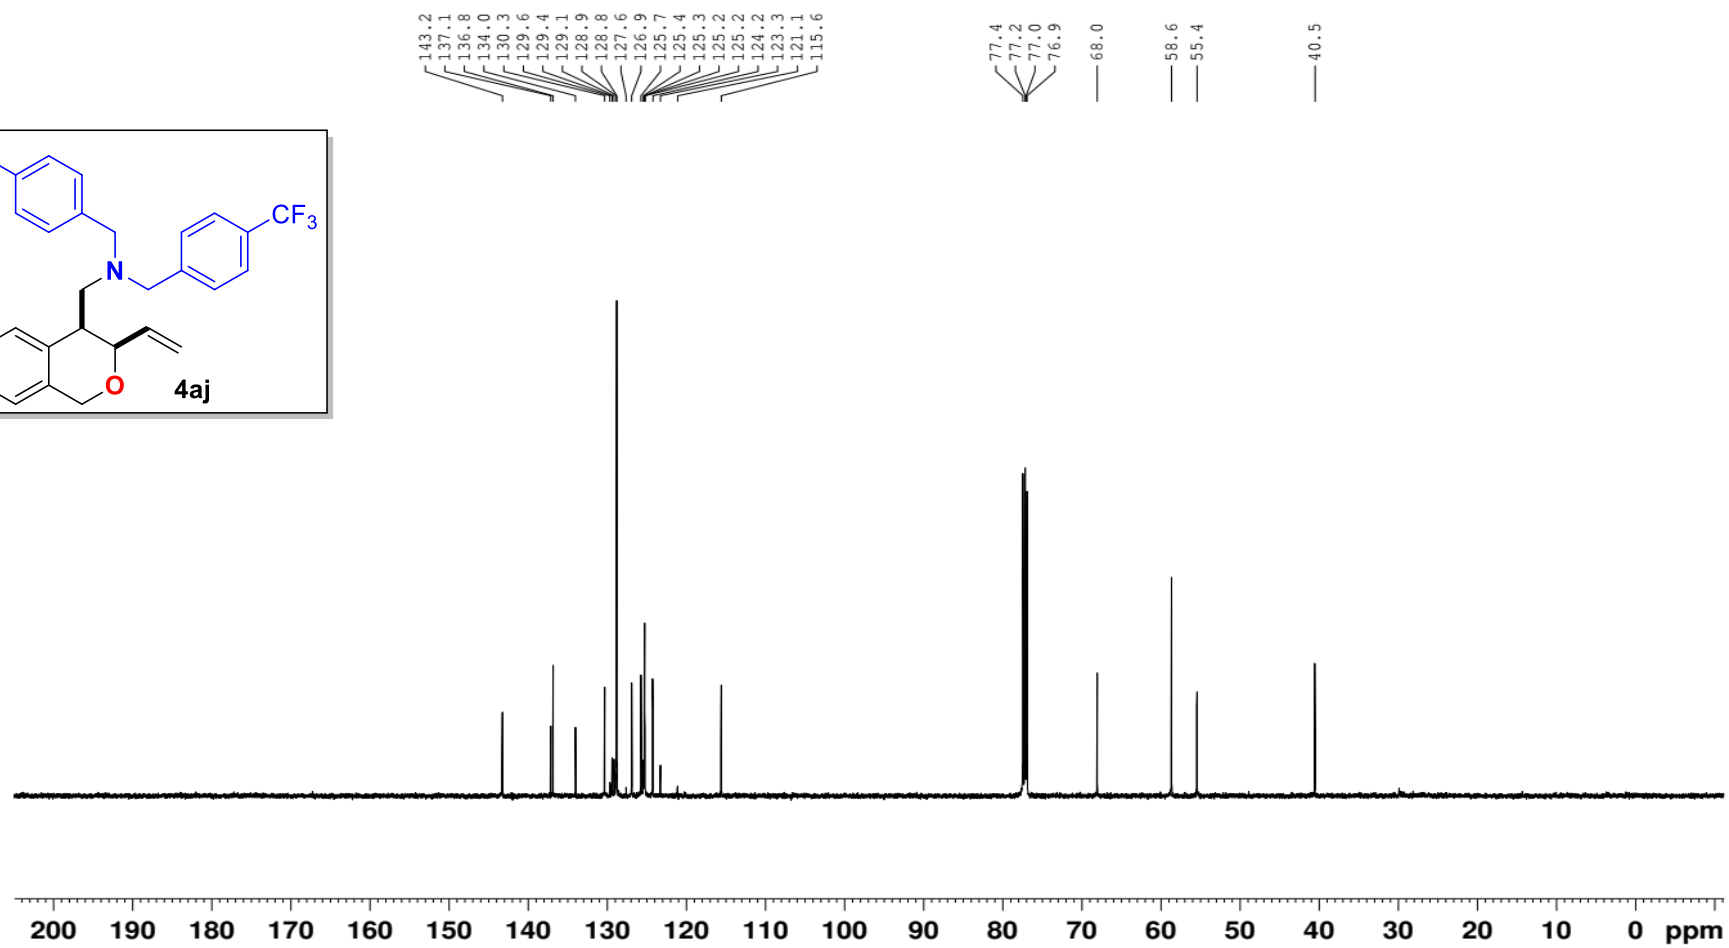



hy-P-4aj <sup>19</sup>F NMR (470MHz CDCl<sub>3</sub>)

XYX-X200706-3-8-CF3-up-FNMR in CDCl<sub>3</sub>

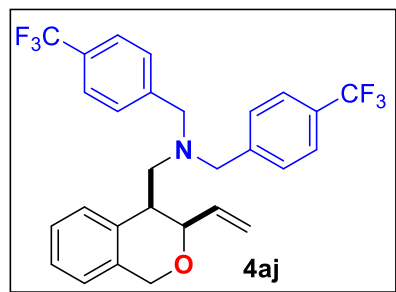

-62.4

0 -20 -40 -60 -80 -100 -120 -140 -160 -180 -200 ppm

hy-P-4ak <sup>1</sup>H NMR (500MHz CDCl<sub>3</sub>)

hy-cis-malin

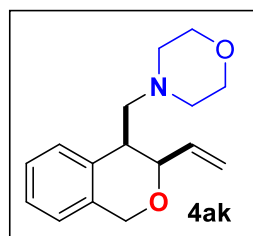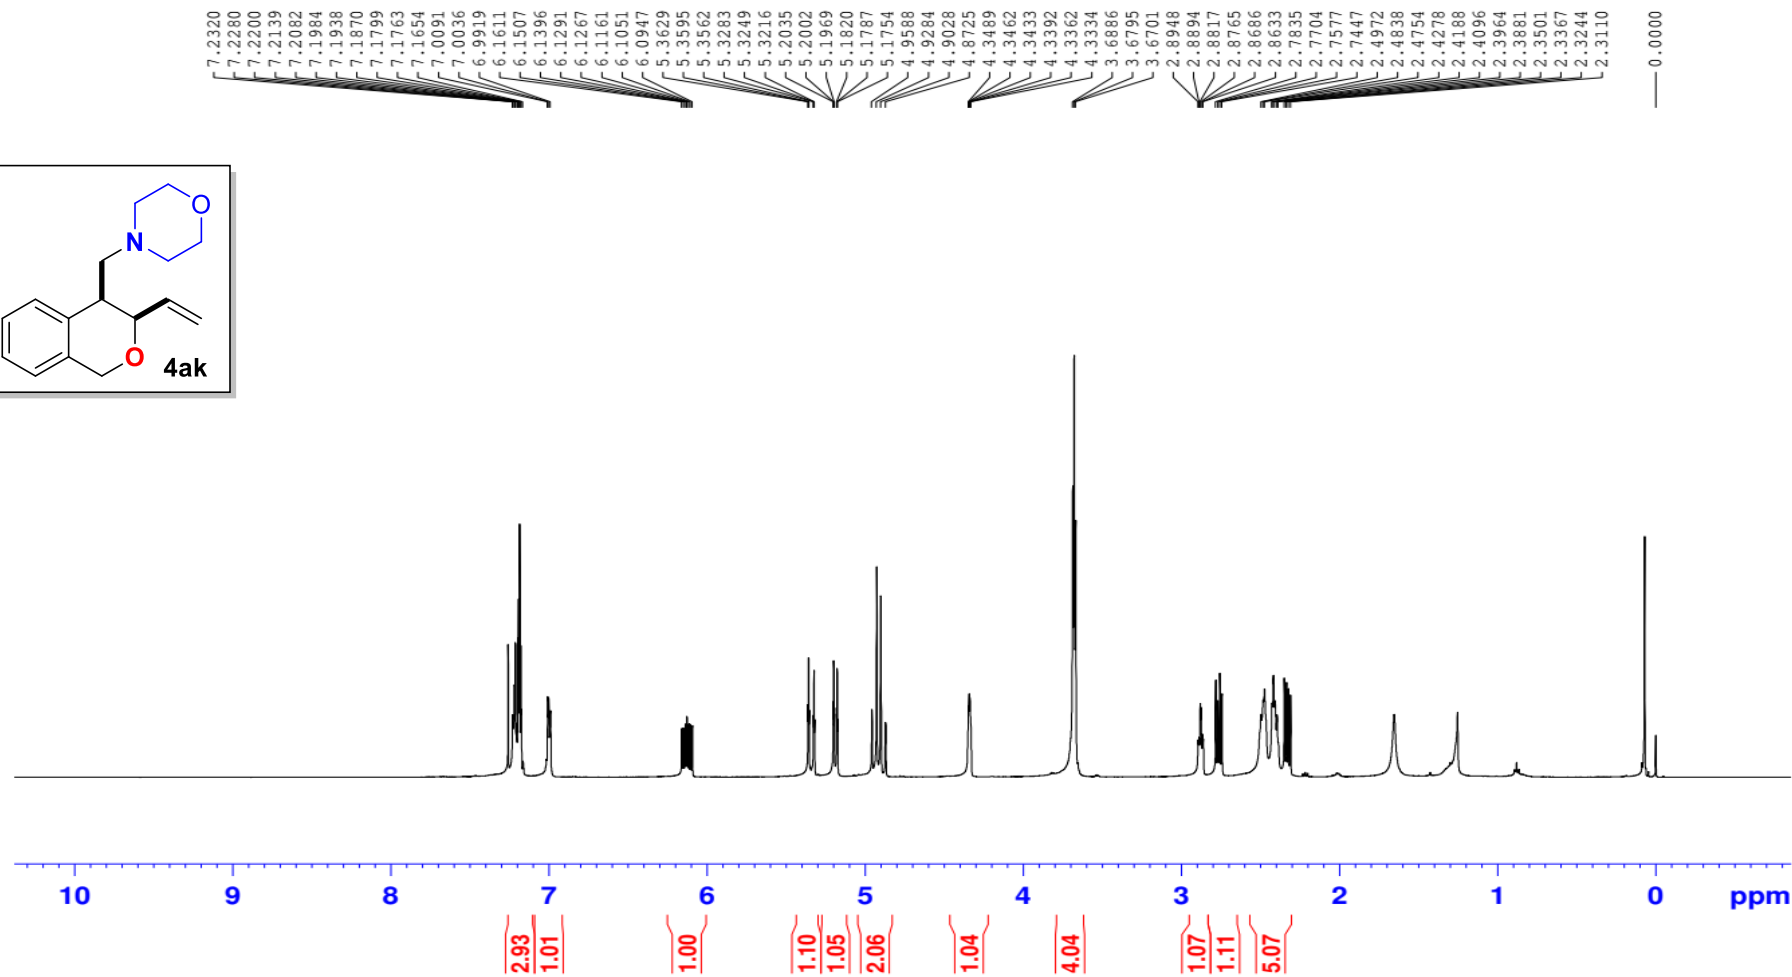

hy-P-4ak <sup>13</sup>C NMR (125MHz CDCl<sub>3</sub>)

hy-3aa-malin-c-

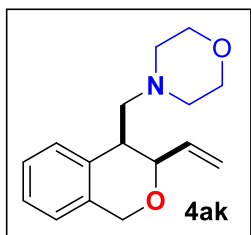

137.5  
137.2  
134.2  
129.8  
126.5  
126.1  
124.0  
114.8

77.6  
77.4  
77.2  
76.9  
68.3  
67.3  
60.6  
54.1  
39.4

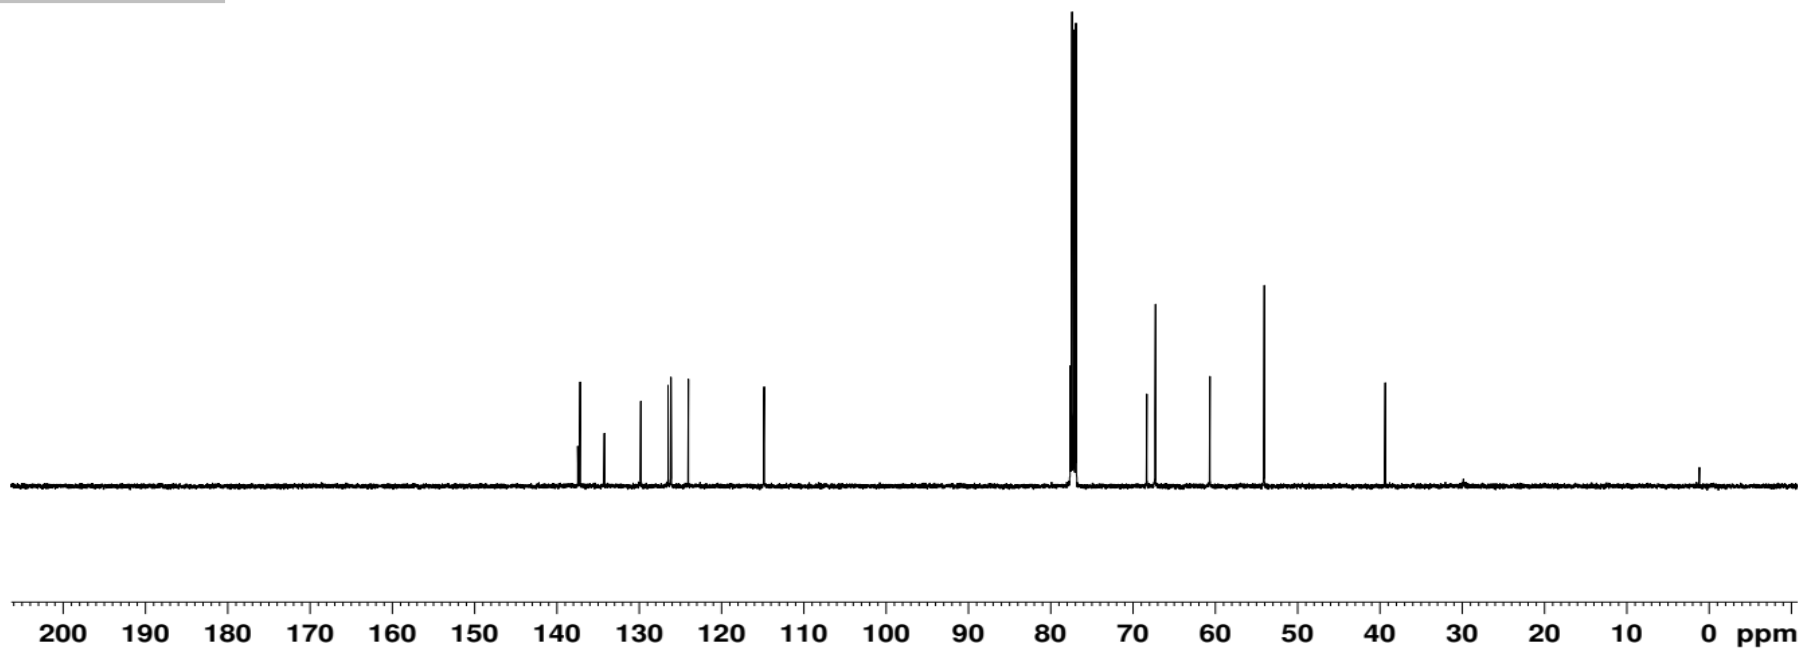

hy-P-4a1 <sup>1</sup>H NMR (500MHz CDCl<sub>3</sub>)

hy-3aa-npr-1

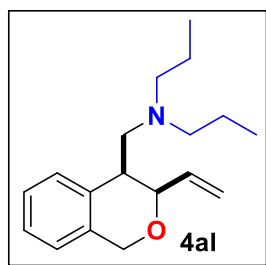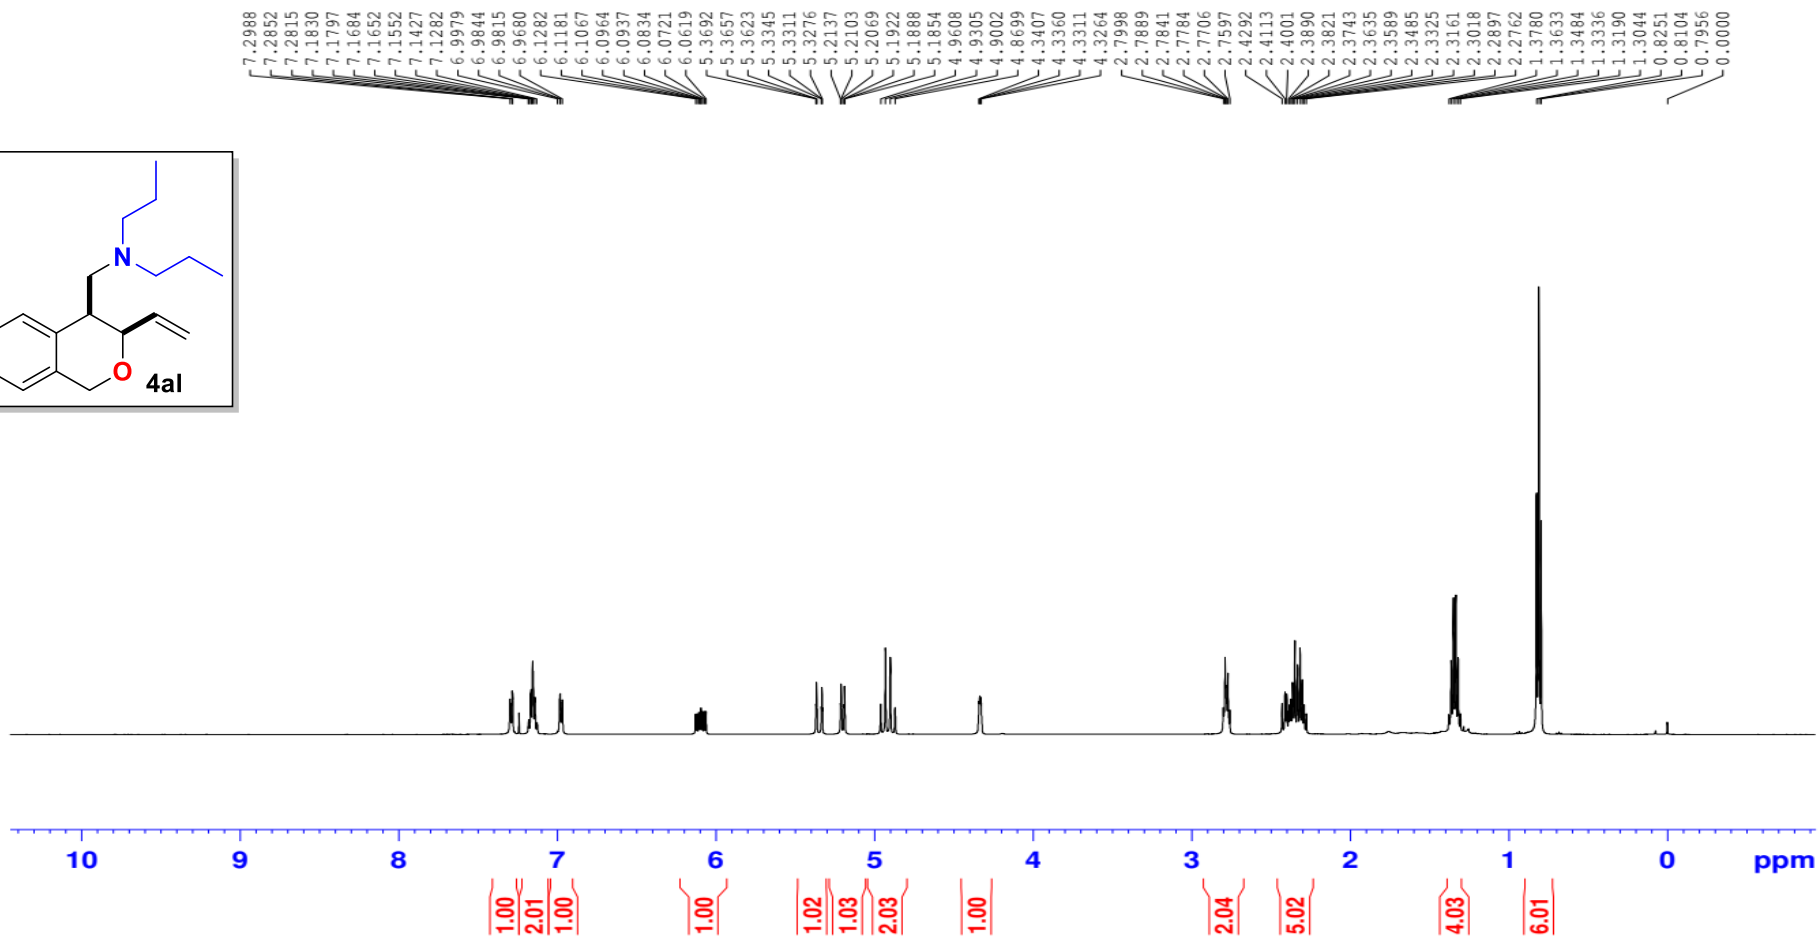

hy-P-4a1 <sup>13</sup>C NMR (125MHz CDCl<sub>3</sub>)

hy-3aa-npr-1-c

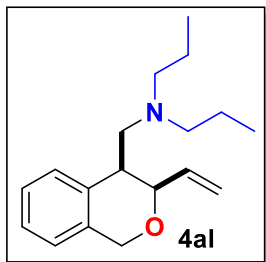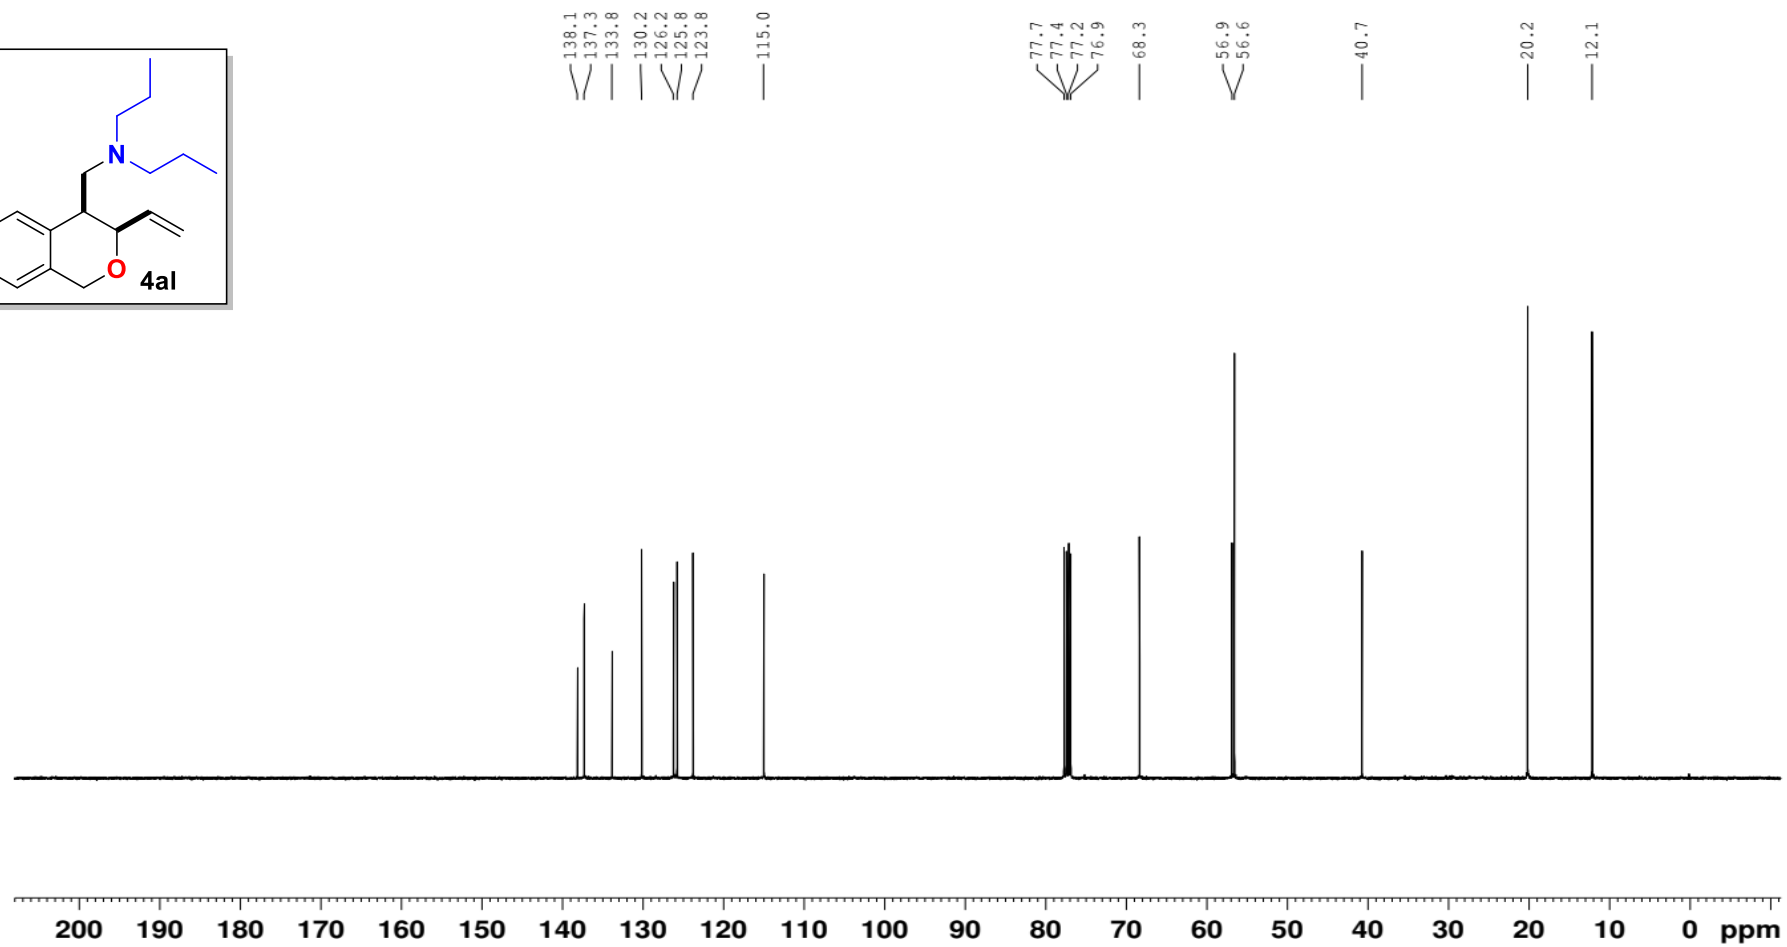

hy-P-4ba <sup>1</sup>H NMR (500MHz CDCl<sub>3</sub>)

hy-x200713-1-4me-up--

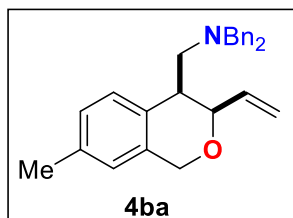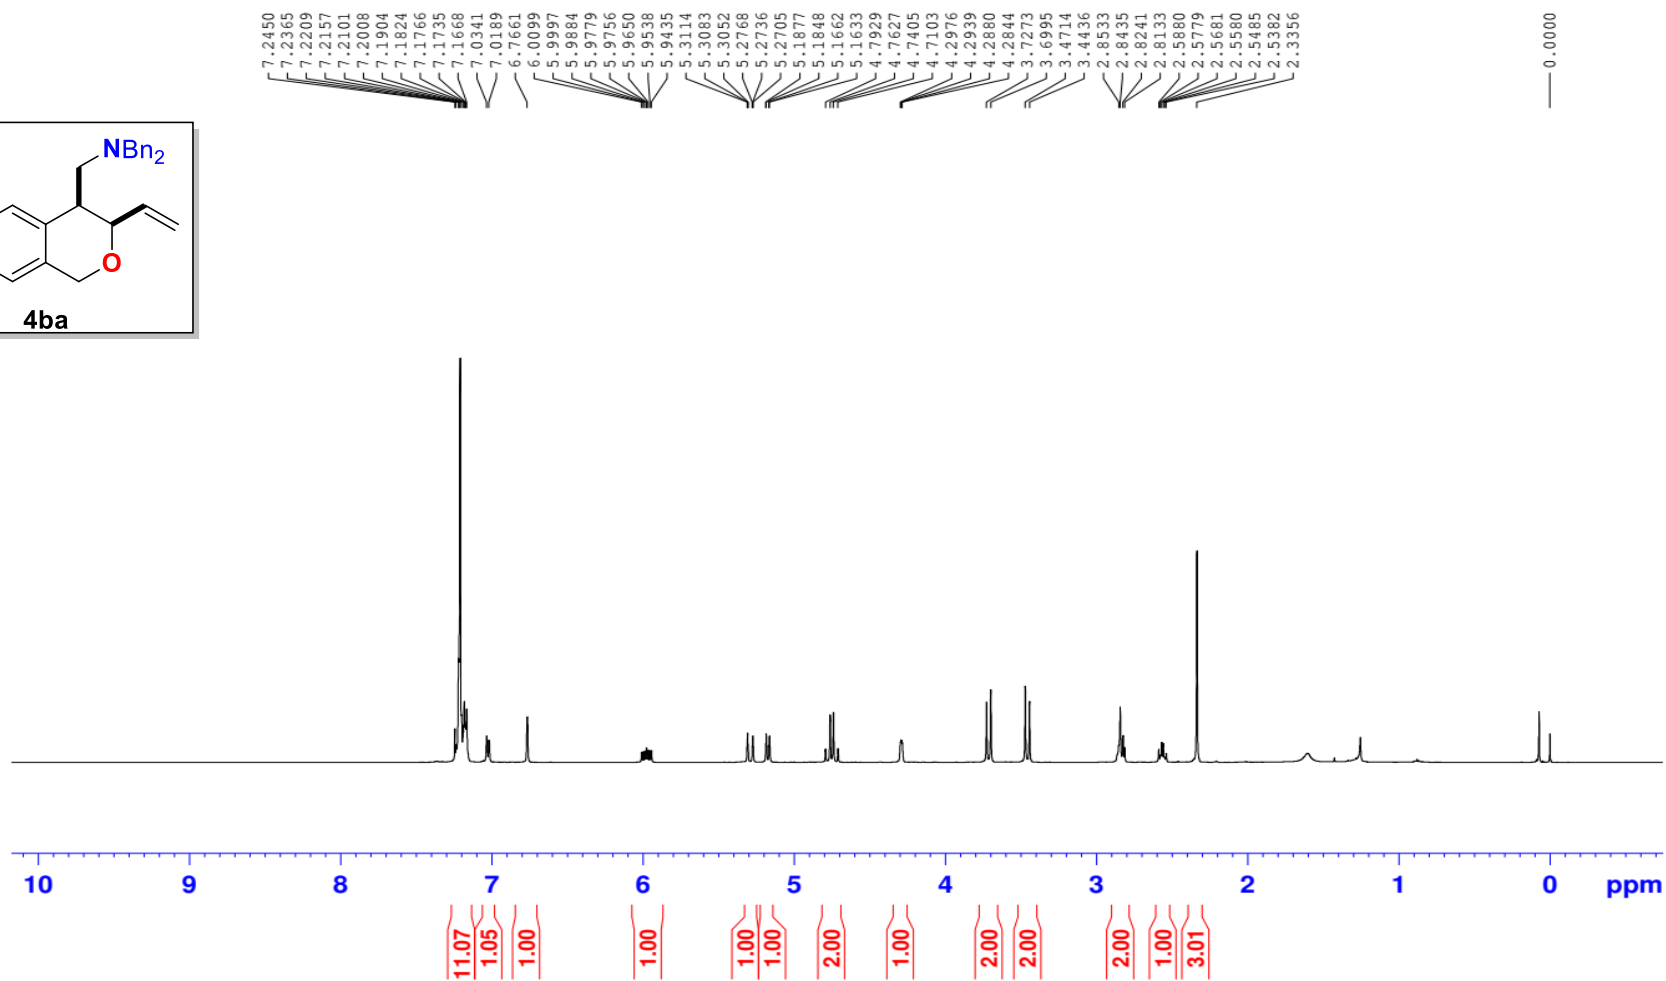

hy-P-4ba <sup>13</sup>C NMR (125MHz CDCl<sub>3</sub>)

YXY-X200713-1-4Me-up-CNMR in CDCl<sub>3</sub>

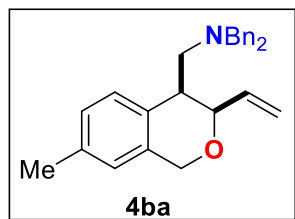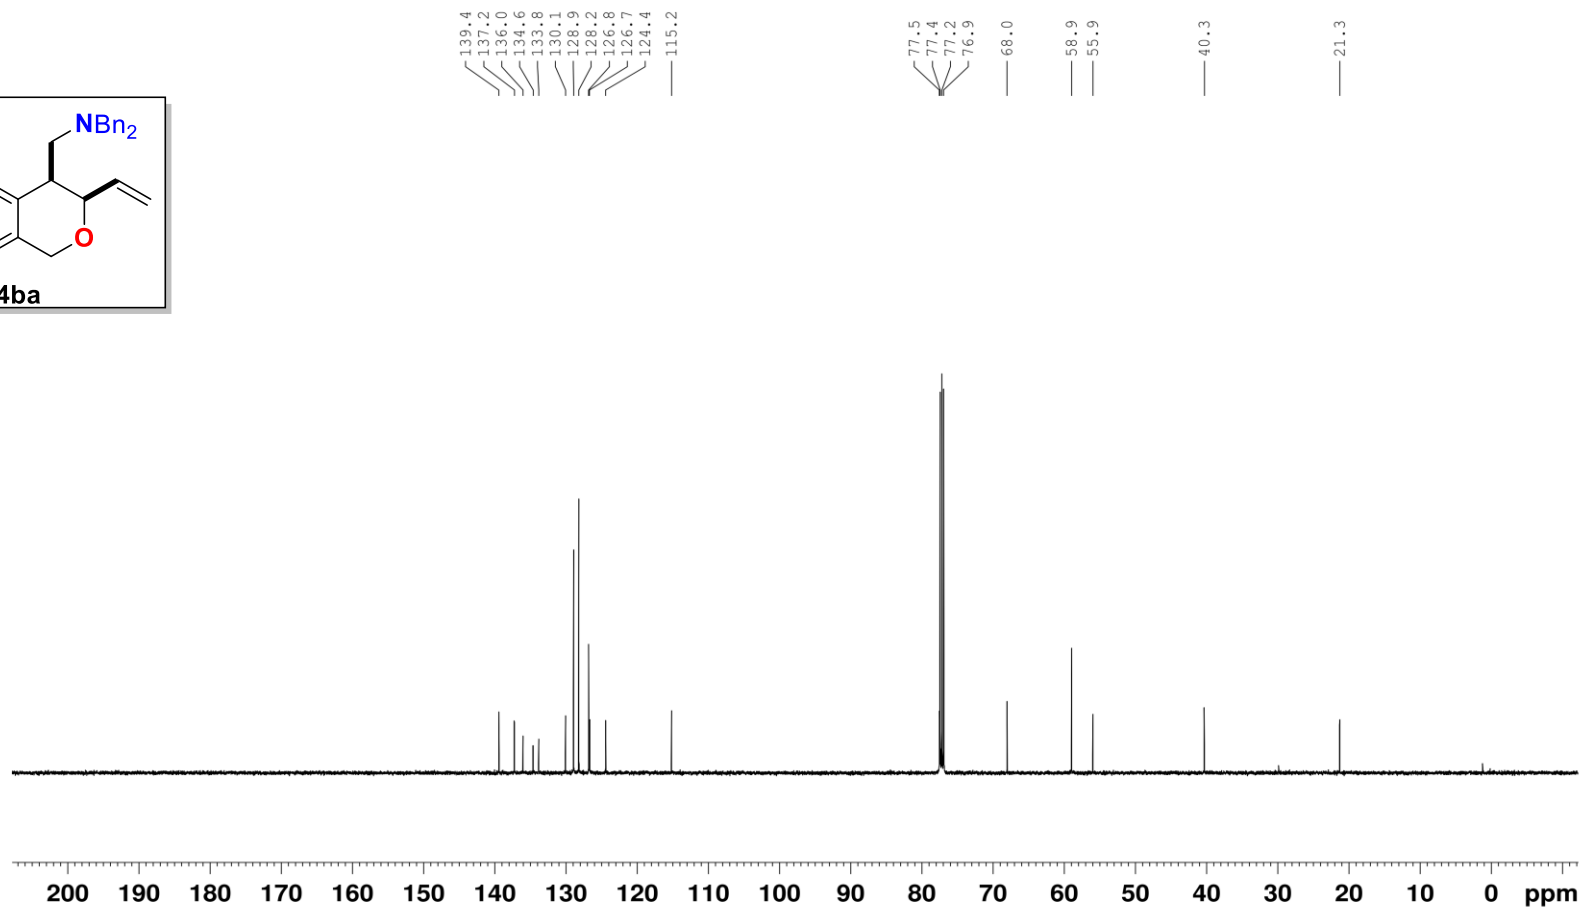

hy-P-4ca <sup>1</sup>H NMR (400MHz CDCl<sub>3</sub>)

YXY-X200713-2-4OMe-up-HNMR in CDCl<sub>3</sub>

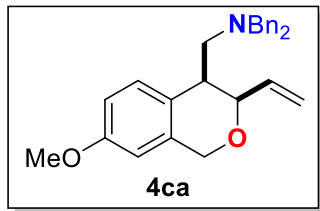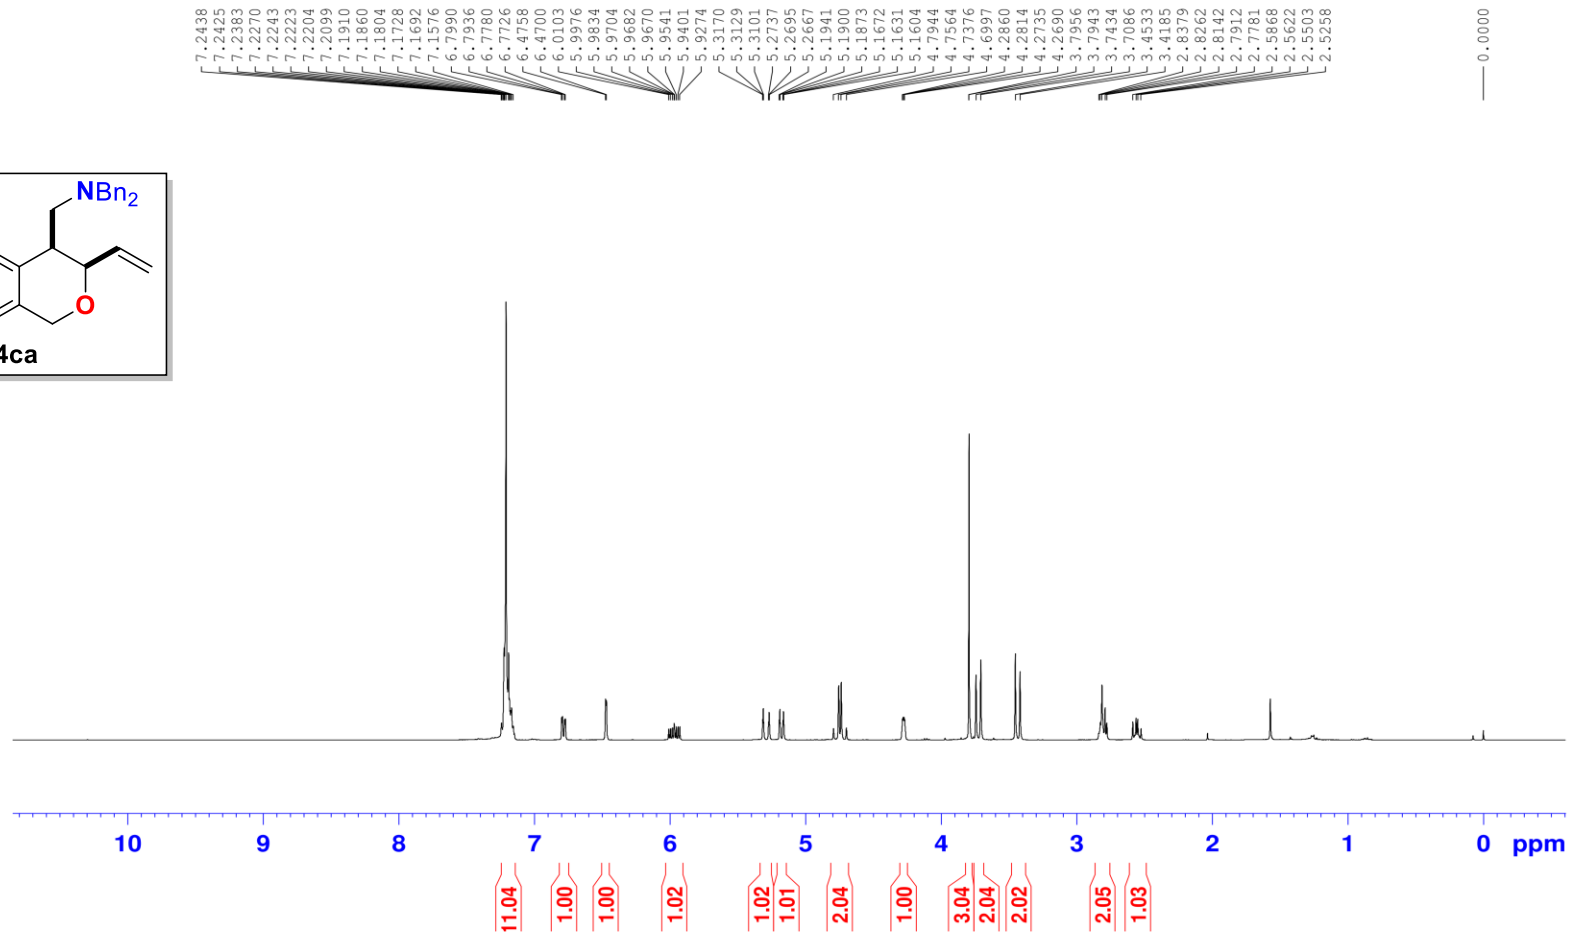



hy-P-4ca <sup>13</sup>C NMR (100MHz CDCl<sub>3</sub>)

YXY-X200713-2-4OMe-up-CNMR in CDCl<sub>3</sub>

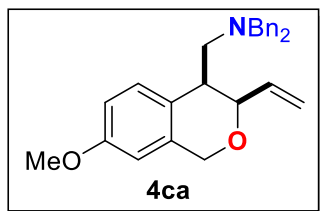

158.3  
139.4  
137.2  
135.1  
131.3  
129.8  
128.9  
128.2  
126.8  
115.2  
112.2  
108.4  
77.7  
77.5  
77.2  
76.8  
68.1  
59.0  
55.9  
55.4  
39.9

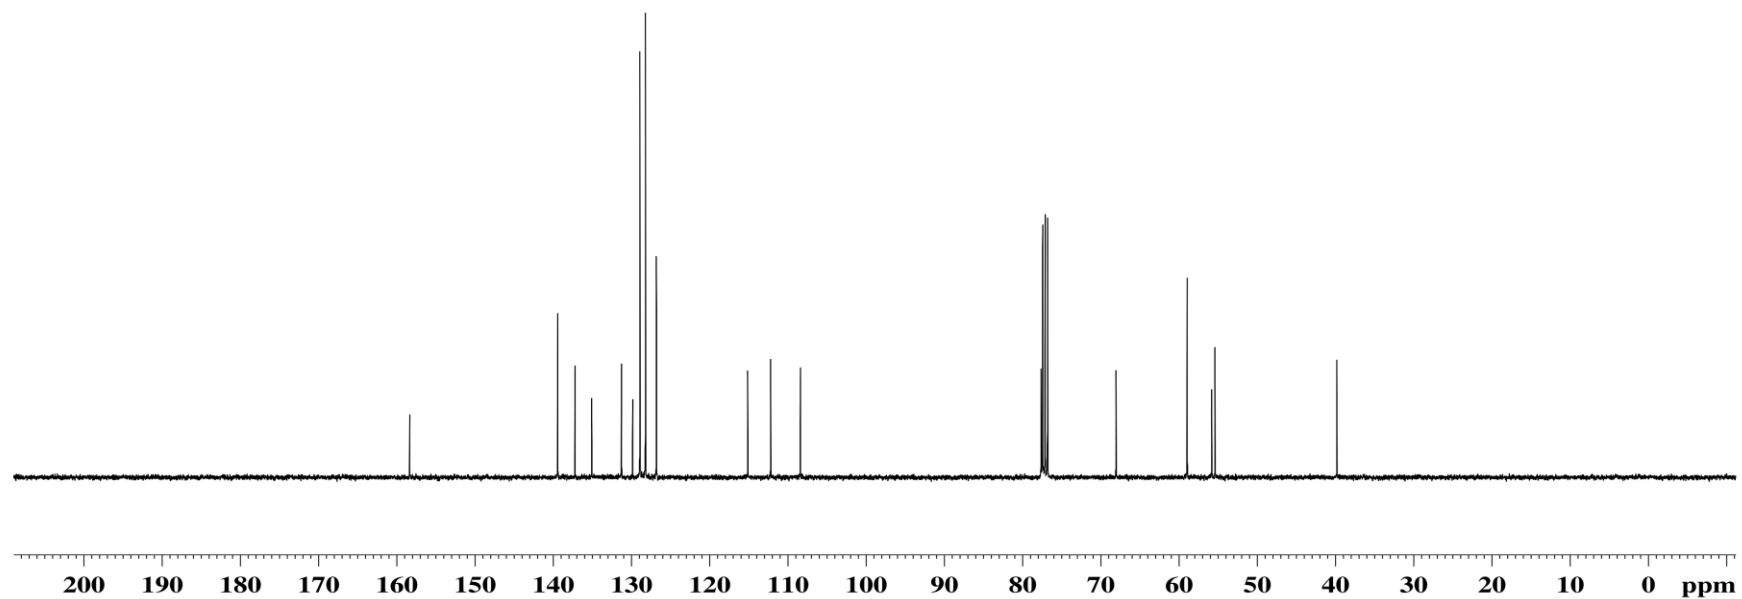

hy-P-4da <sup>1</sup>H NMR (500MHz CDCl<sub>3</sub>)

xyy-x200713-3-5-ome--

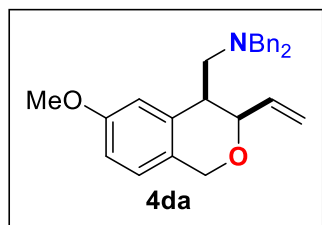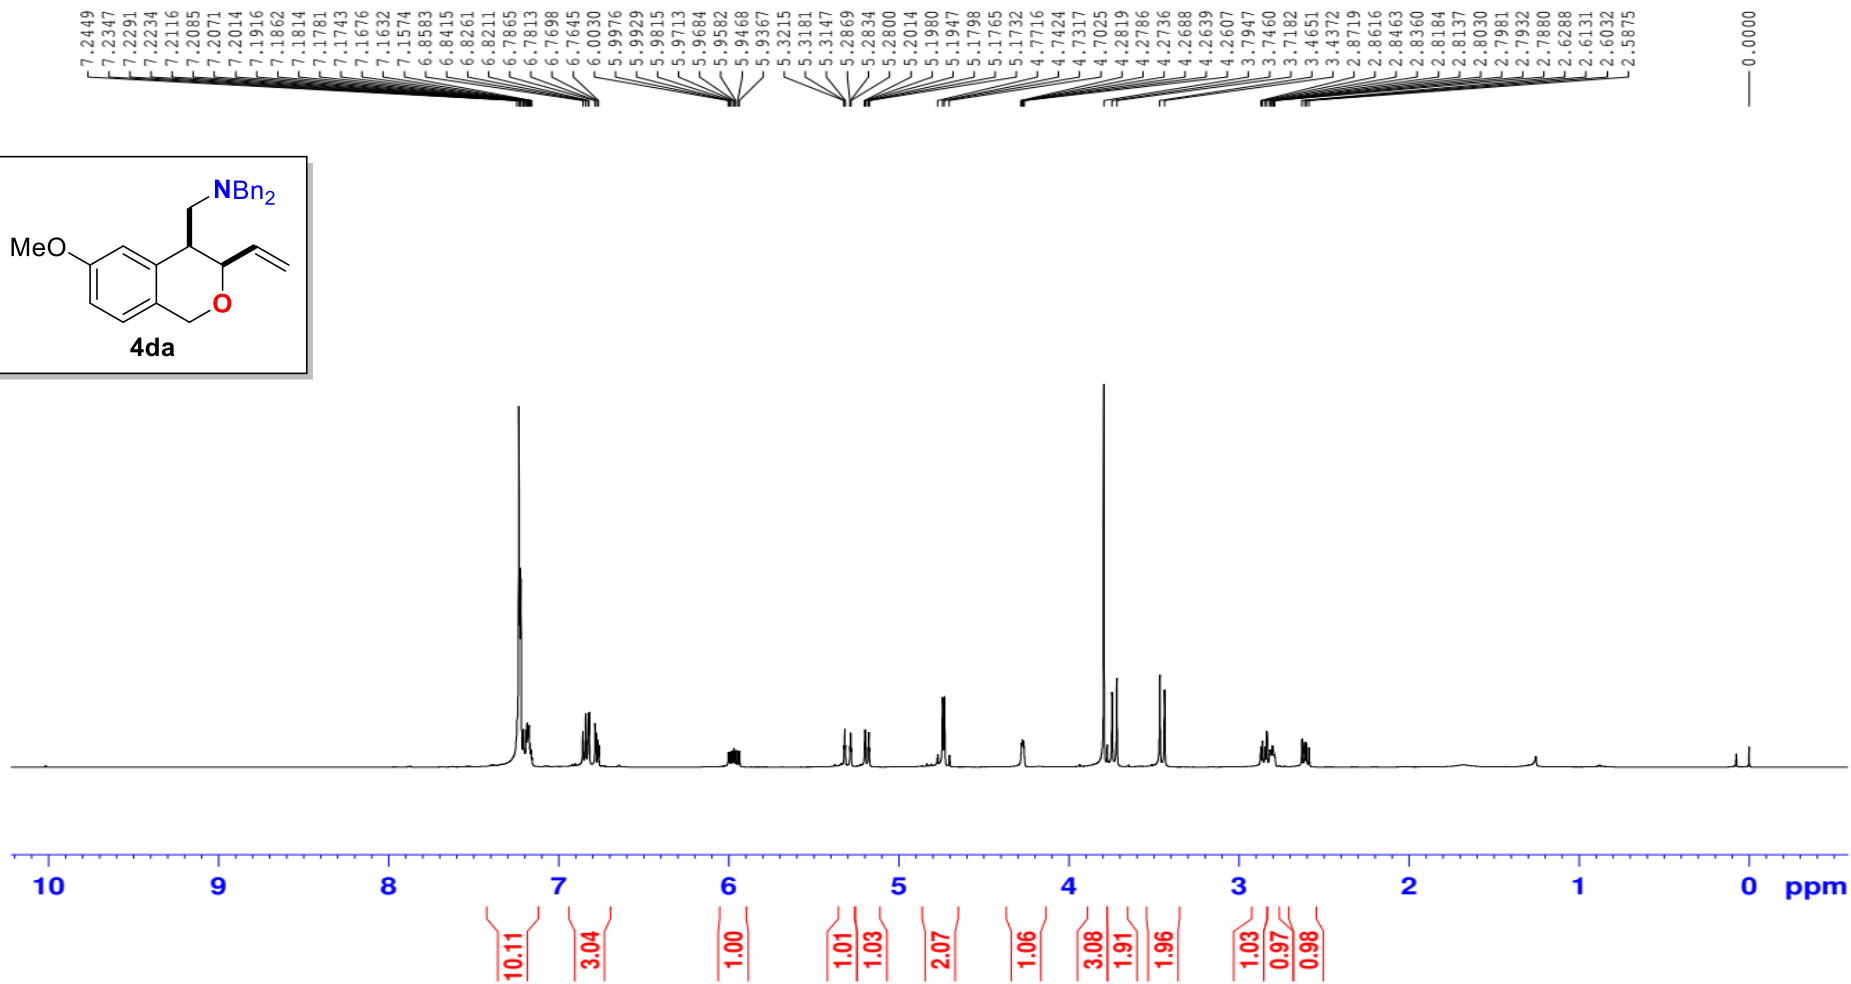

yxy-x200713-3-5-ome-2-c

hy-P-4da <sup>13</sup>C NMR (125MHz CDCl<sub>3</sub>)

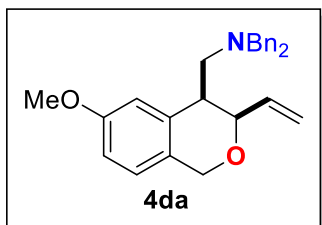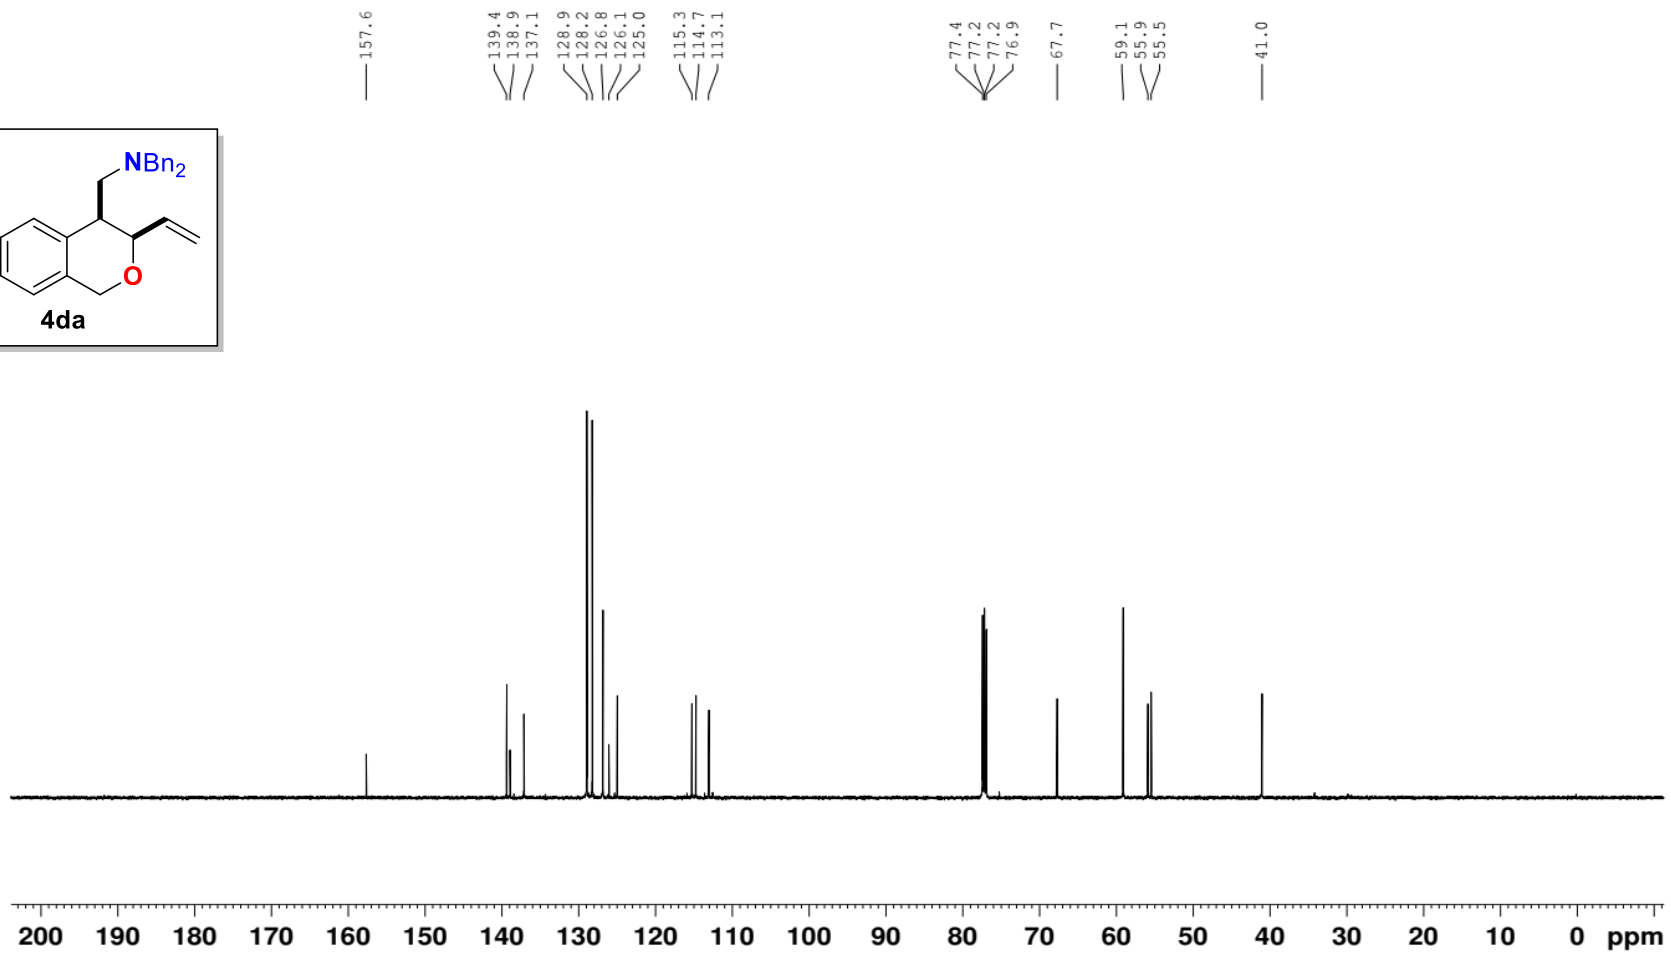

hy-P-4ea <sup>1</sup>H NMR (400MHz CDCl<sub>3</sub>)

yxy-x200713-5-otbs-2

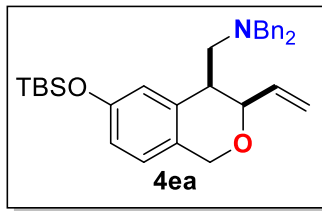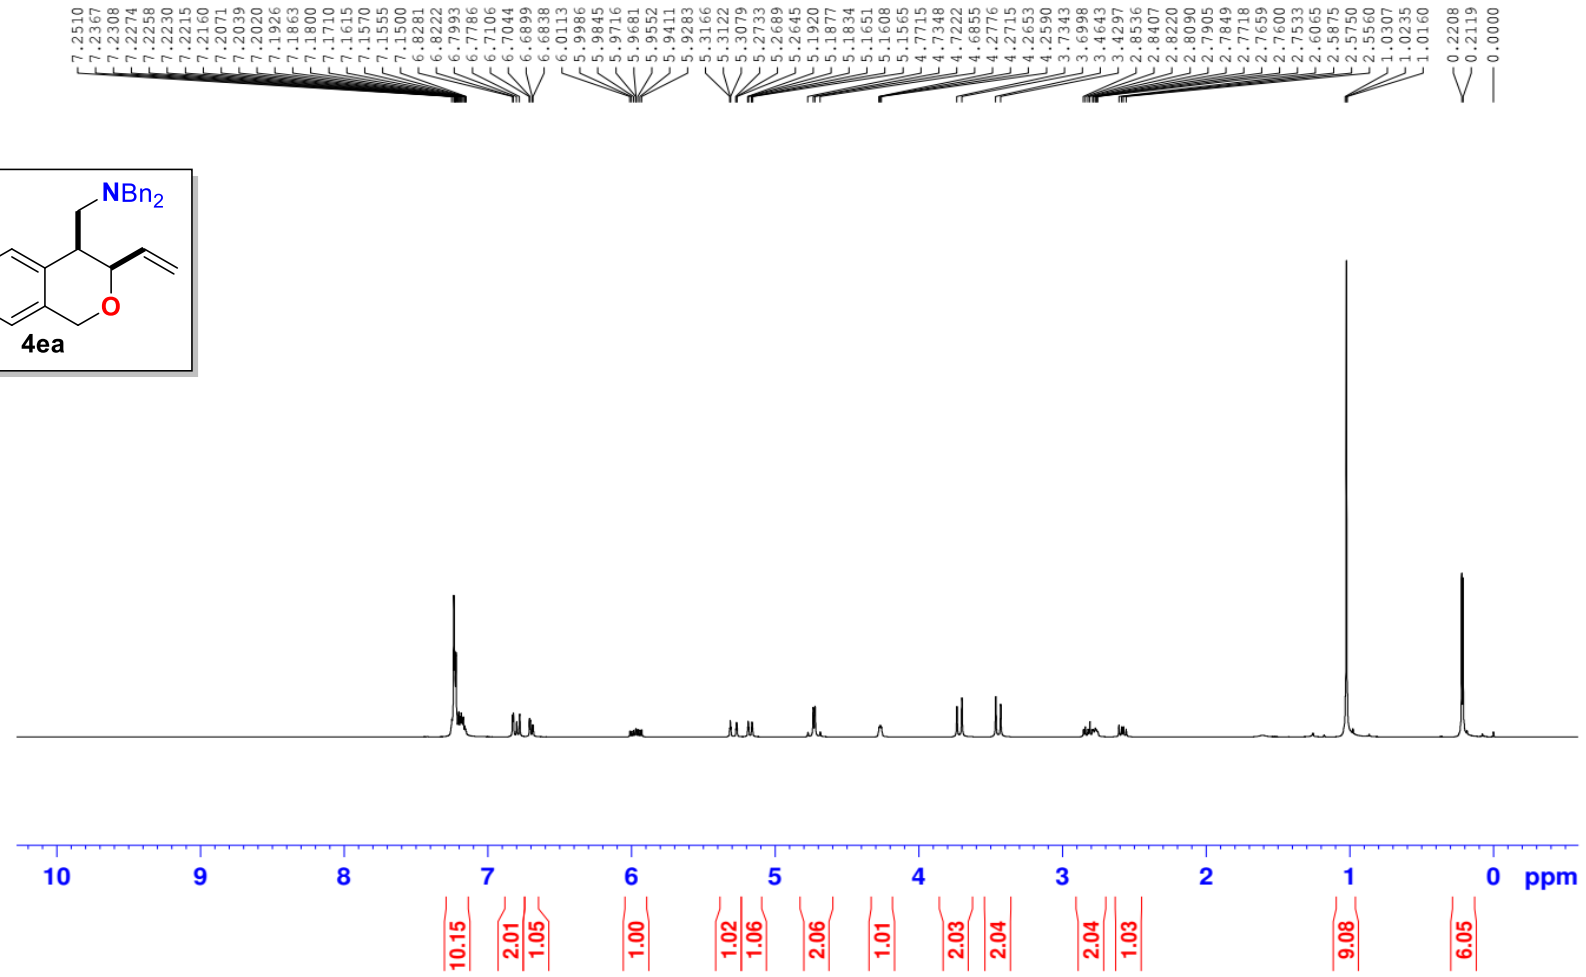

hy-P-4ea <sup>13</sup>C NMR (125MHz CDCl<sub>3</sub>)

YXY-X200713-5-OTBS-up-CNMR in CDCl<sub>3</sub>

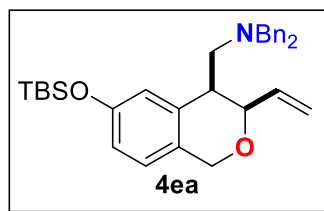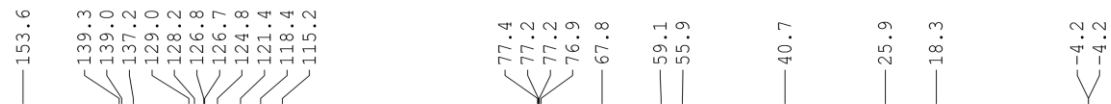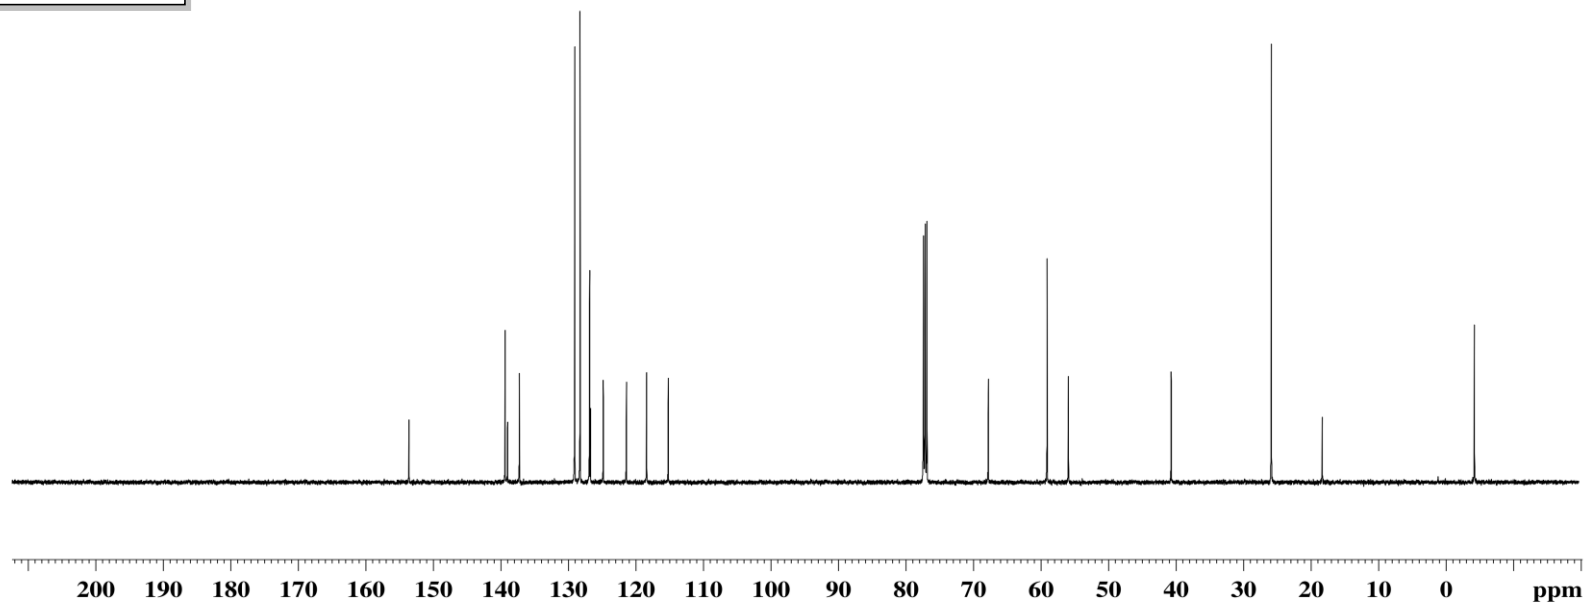

hy-P-4fa <sup>1</sup>H NMR (400MHz CDCl<sub>3</sub>)

yxy-x200713-4,5-ome-h--

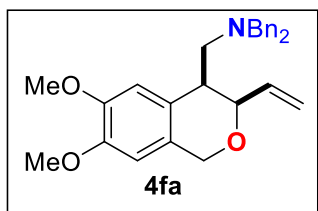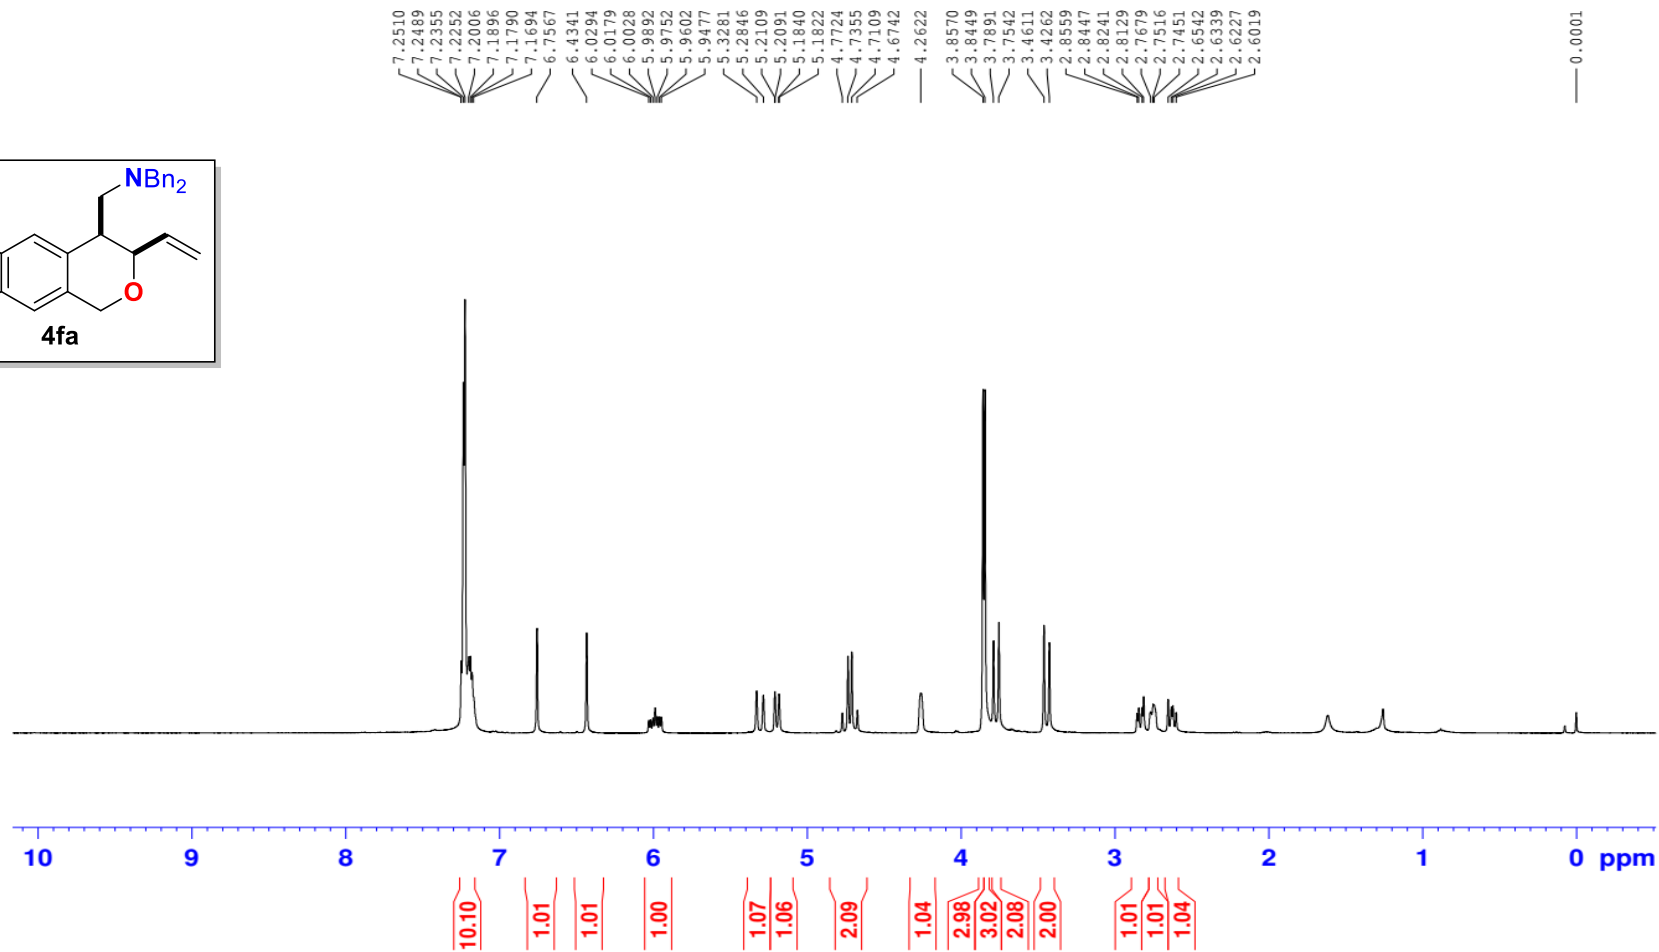



hy-P-4ga <sup>1</sup>H NMR (400MHz CDCl<sub>3</sub>)

yxy-x200714-1-4f-2-1

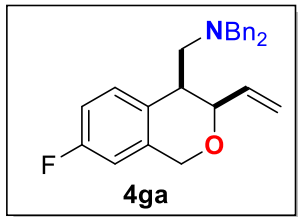

7.2681  
7.2492  
7.2400  
7.2256  
7.2107  
7.1953  
7.1851  
7.1776  
7.1621  
6.9409  
6.9346  
6.9195  
6.9132  
6.8981  
6.8918  
6.6531  
6.6472  
6.6301  
6.6242  
5.9906  
5.9781  
5.9637  
5.9507  
5.9476  
5.9348  
5.9203  
5.9079  
5.3273  
5.2839  
5.2199  
5.1930  
4.7770  
4.7384  
4.7148  
4.6762  
4.2743  
4.2689  
4.2629  
4.2576  
3.7889  
3.7542  
3.4077  
3.3730  
2.8268  
2.8192  
2.8040  
2.7989  
2.7903  
2.7784  
2.7579  
2.7461  
2.5900  
2.5681  
2.5579  
2.5360

—0.0001

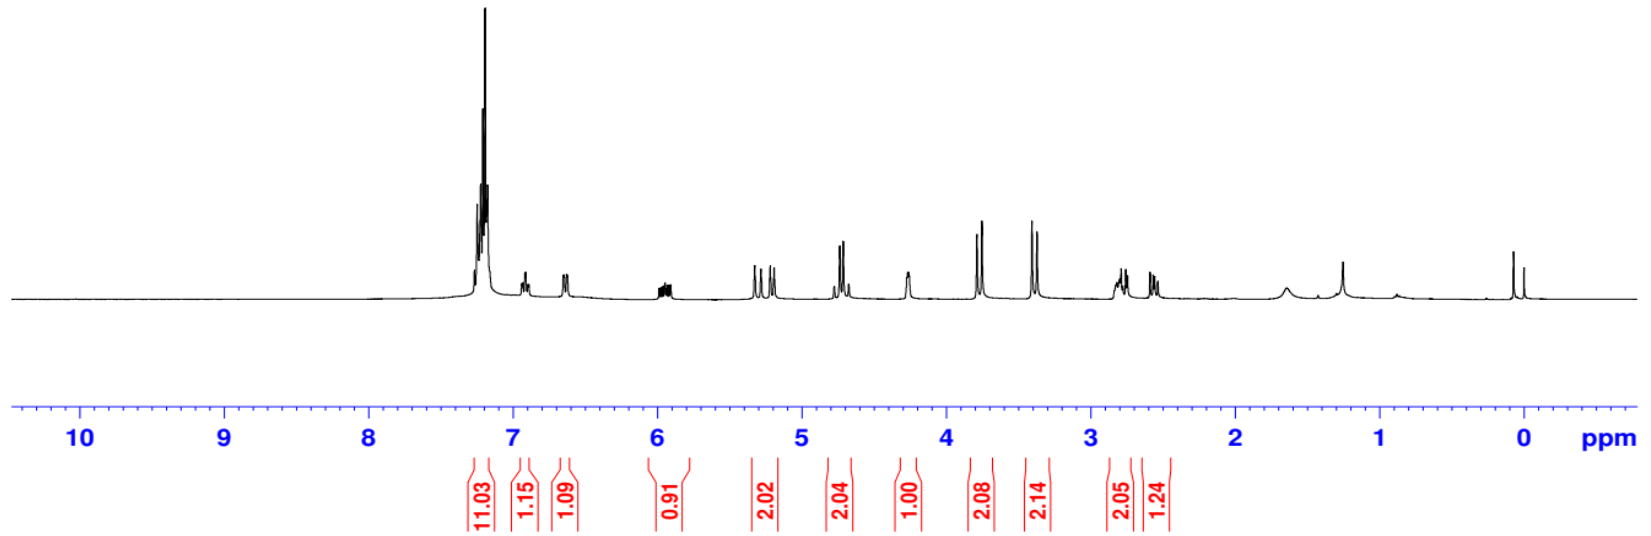



hy-P-4ga <sup>13</sup>C NMR (125MHz CDCl<sub>3</sub>)

YXY-X200714-1-4F-up-CNMR in CDCl<sub>3</sub>

162.6  
160.7  
139.3  
136.8  
135.8  
135.8  
133.3  
132.0  
131.9  
128.8  
128.2  
126.9  
115.5  
112.9  
112.7  
110.5  
110.3  
77.4  
77.4  
77.2  
76.9  
67.8  
59.1  
55.4  
40.0

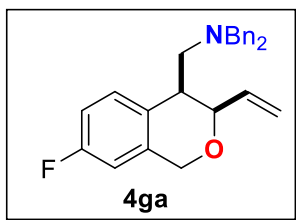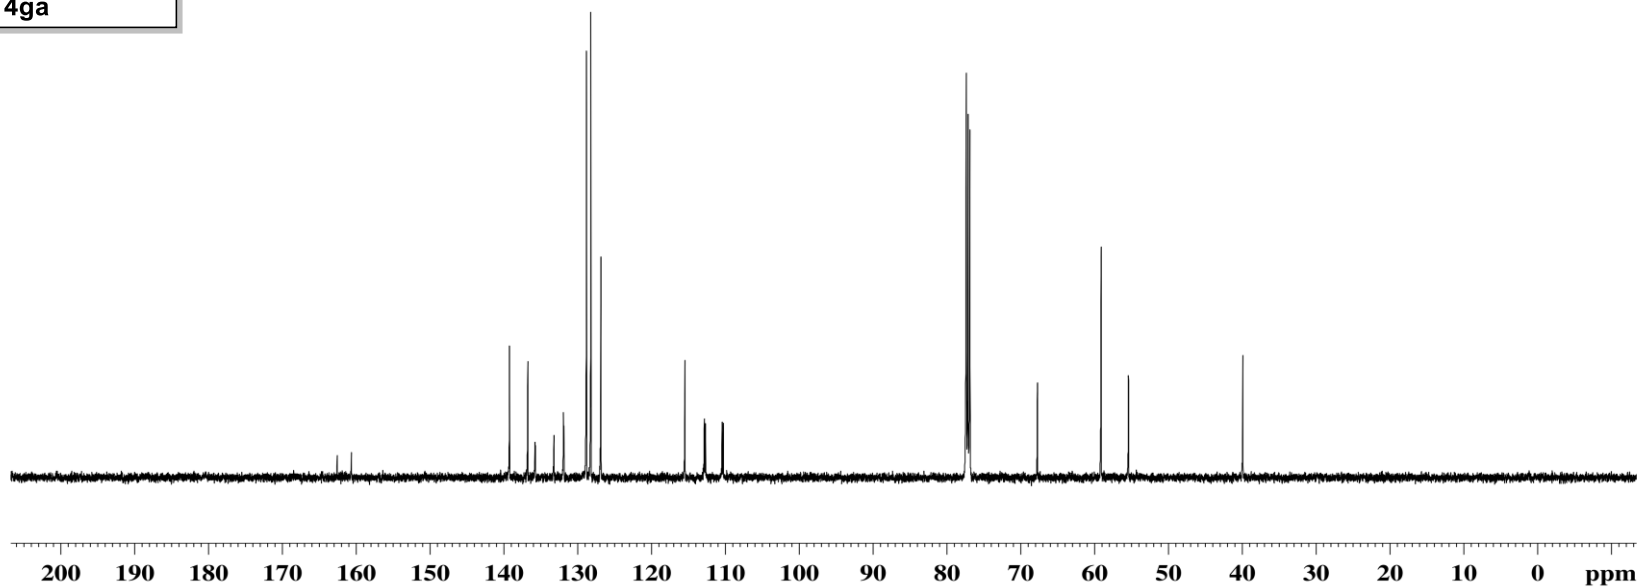

hy-P-4ga <sup>19</sup>F NMR (470MHz CDCl<sub>3</sub>)

YXY-X200714-1-4F-up-FNMR in CDCl<sub>3</sub>

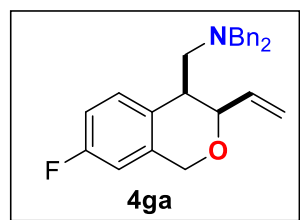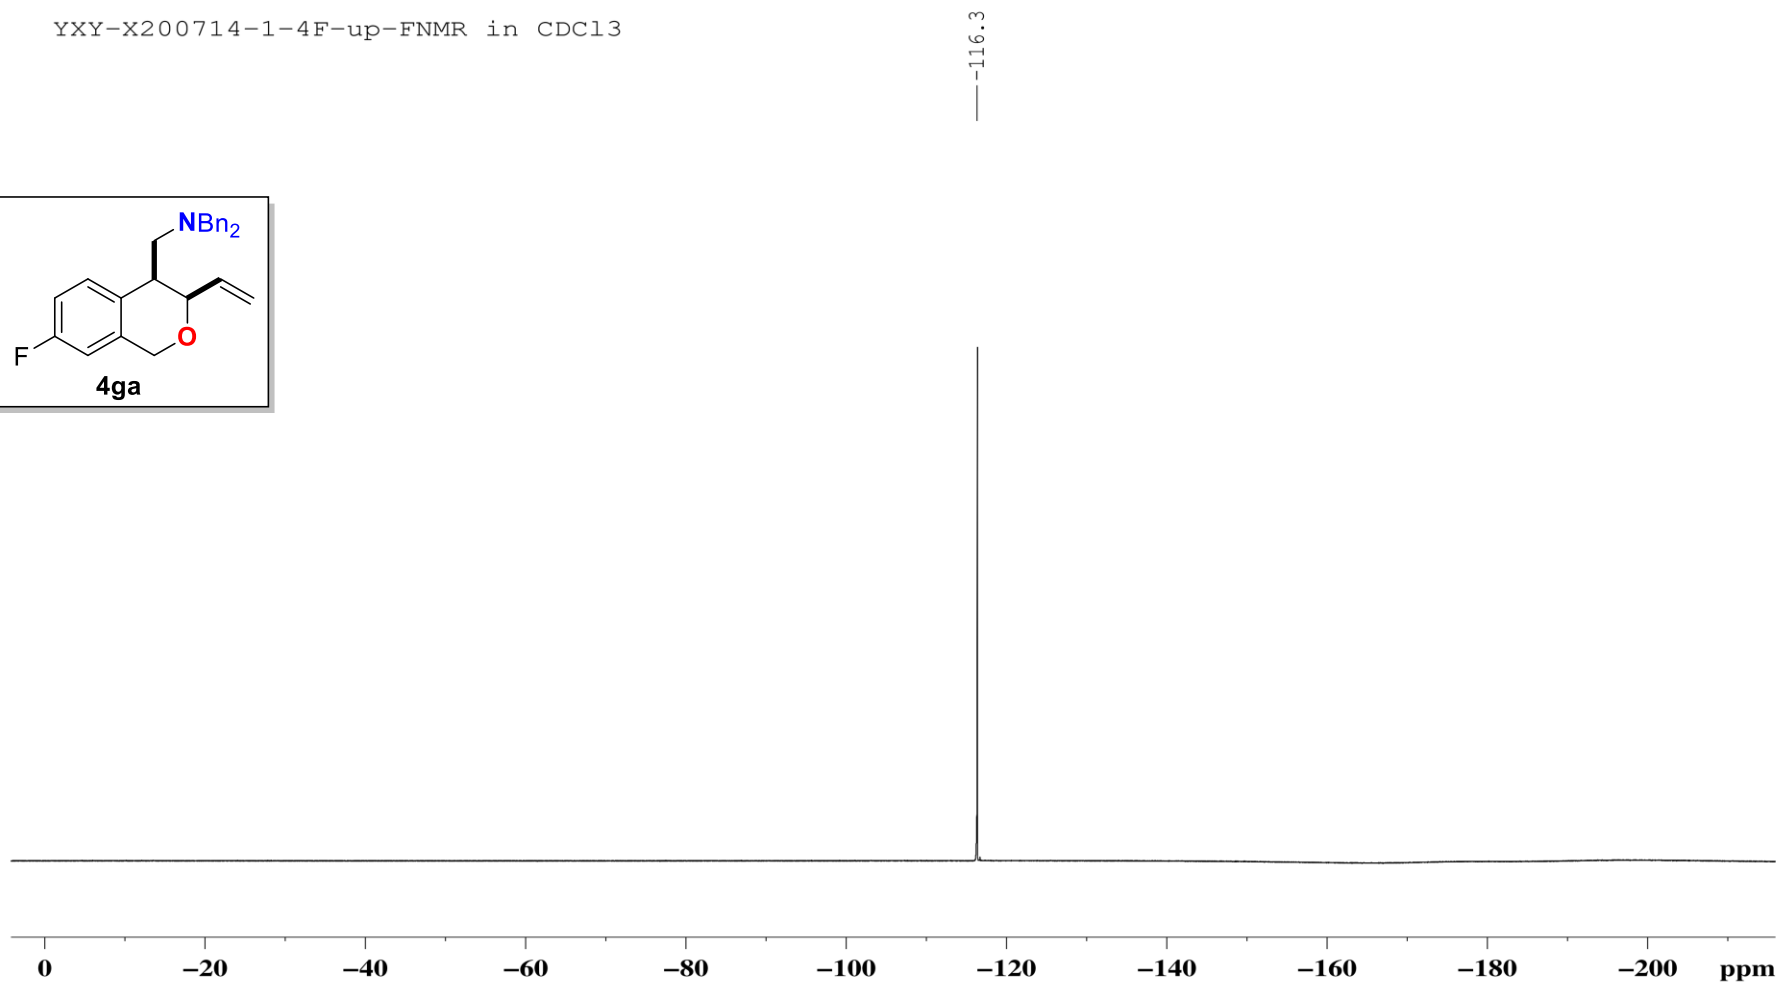

hy-P-4ha <sup>1</sup>H NMR (400MHz CDCl<sub>3</sub>)

yxy-x200713-7-f-2

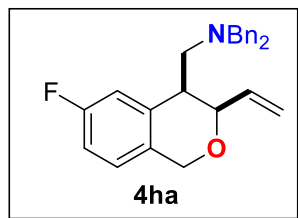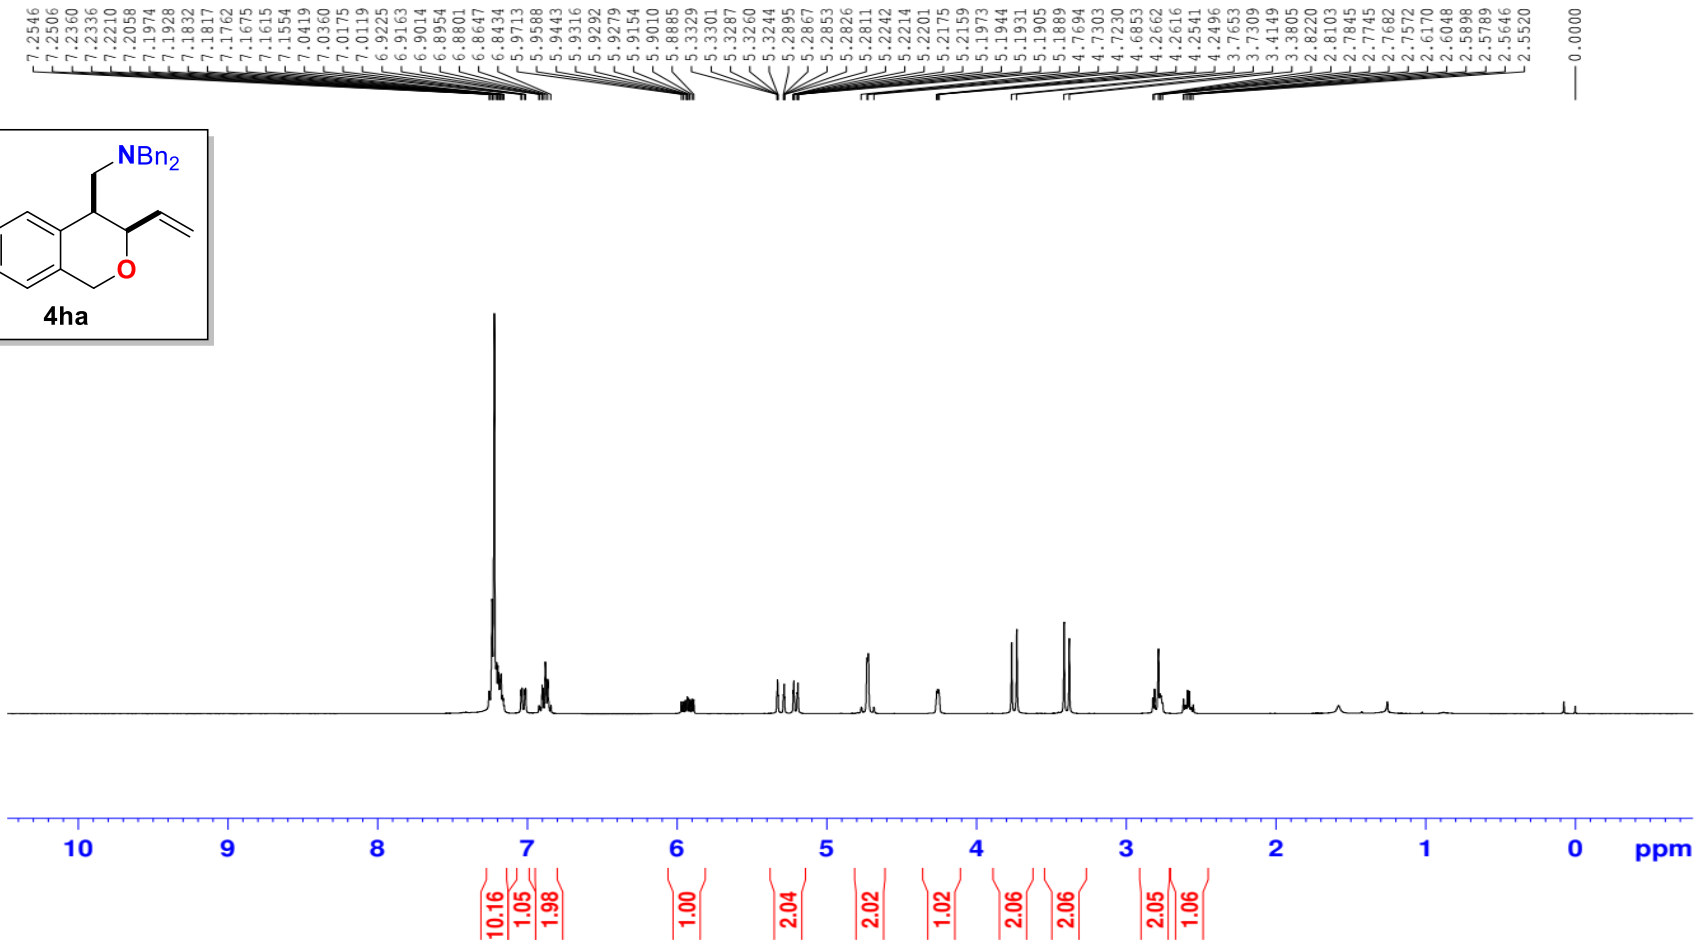

hy-P-4ha <sup>13</sup>C NMR (125MHz CDCl<sub>3</sub>)

YXY-X200713-7-5F-up-CNMR in CDCl<sub>3</sub>

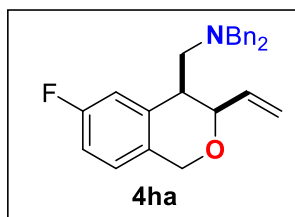

161.9  
160.0  
139.8  
139.7  
139.2  
136.6  
129.4  
129.3  
129.0  
128.3  
126.9  
125.4  
125.3  
116.8  
116.6  
115.6  
113.7  
113.5

77.4  
77.2  
76.9  
67.6  
59.2  
55.4

40.6

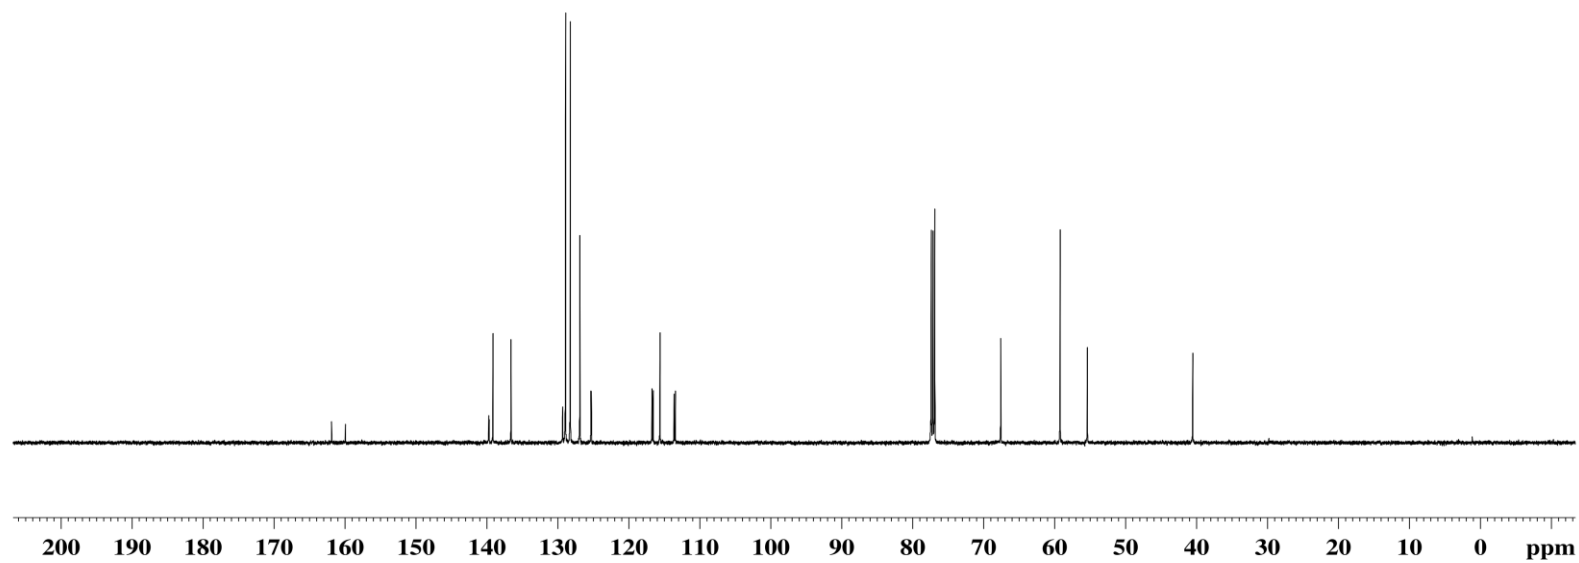

hy-P-4ha <sup>19</sup>F NMR (470MHz CDCl<sub>3</sub>)

YXY-X200713-7-5F-up-FNMR in CDCl<sub>3</sub>

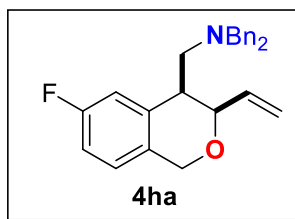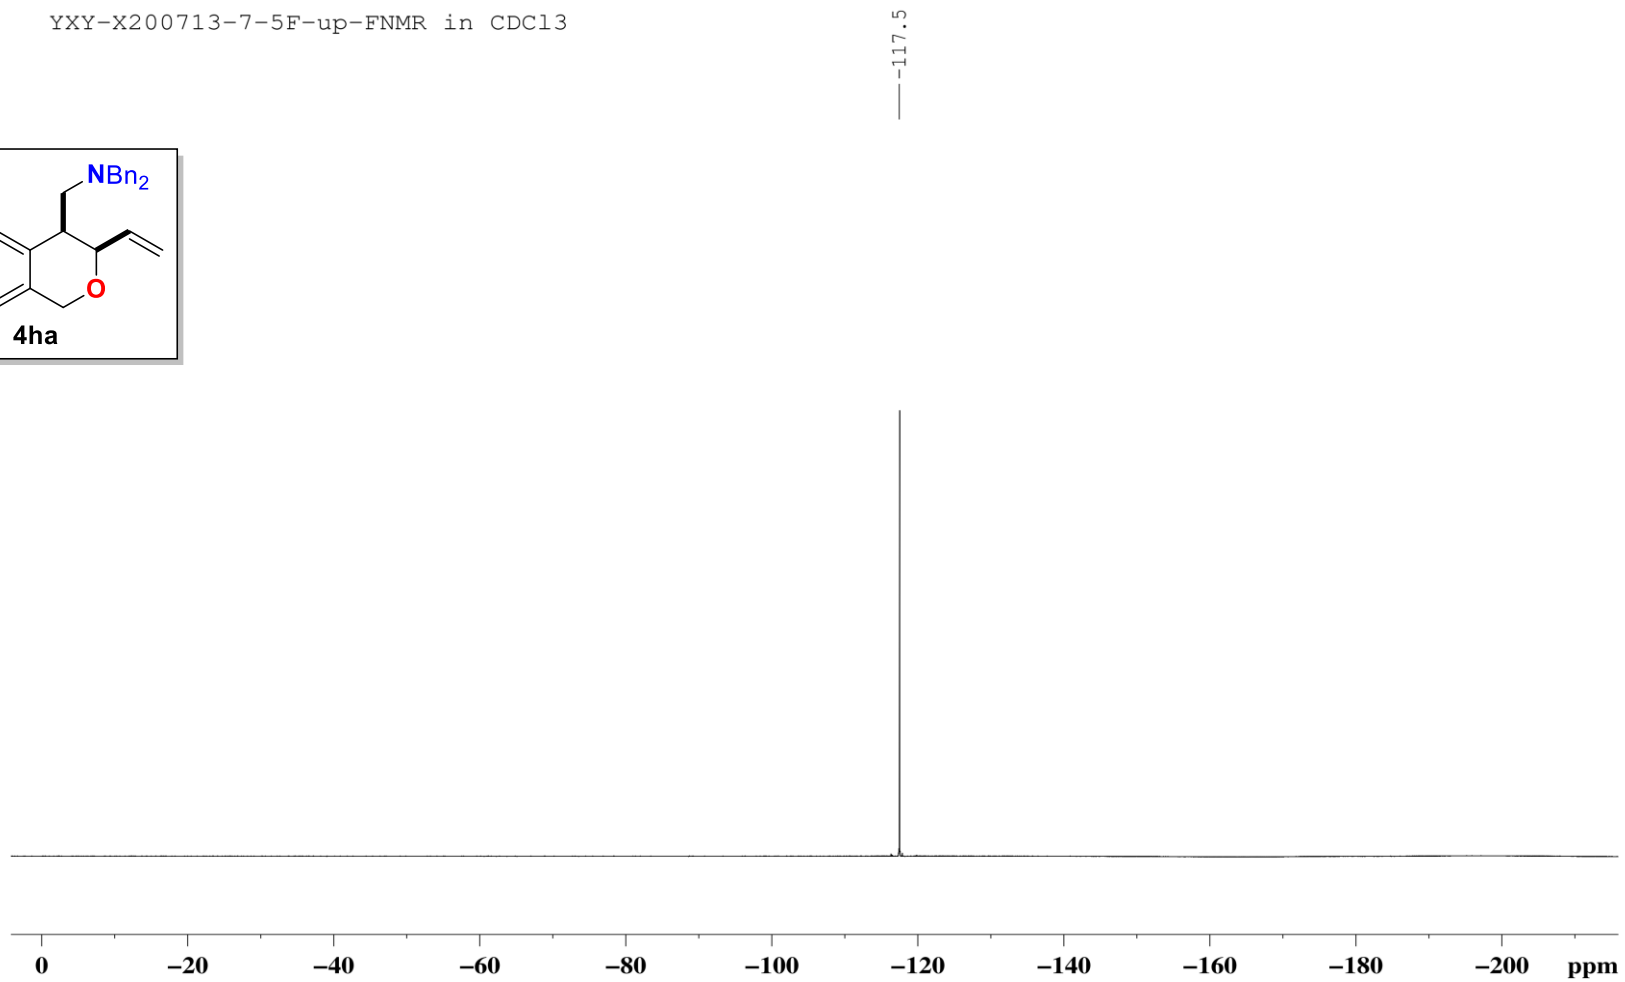

hy-P-4ia <sup>1</sup>H NMR (500MHz CDCl<sub>3</sub>)

YXY-X200714-2-6F-up-HNMR in CDCl<sub>3</sub>

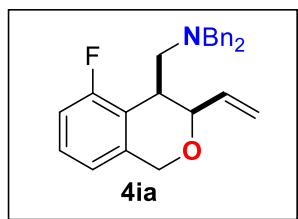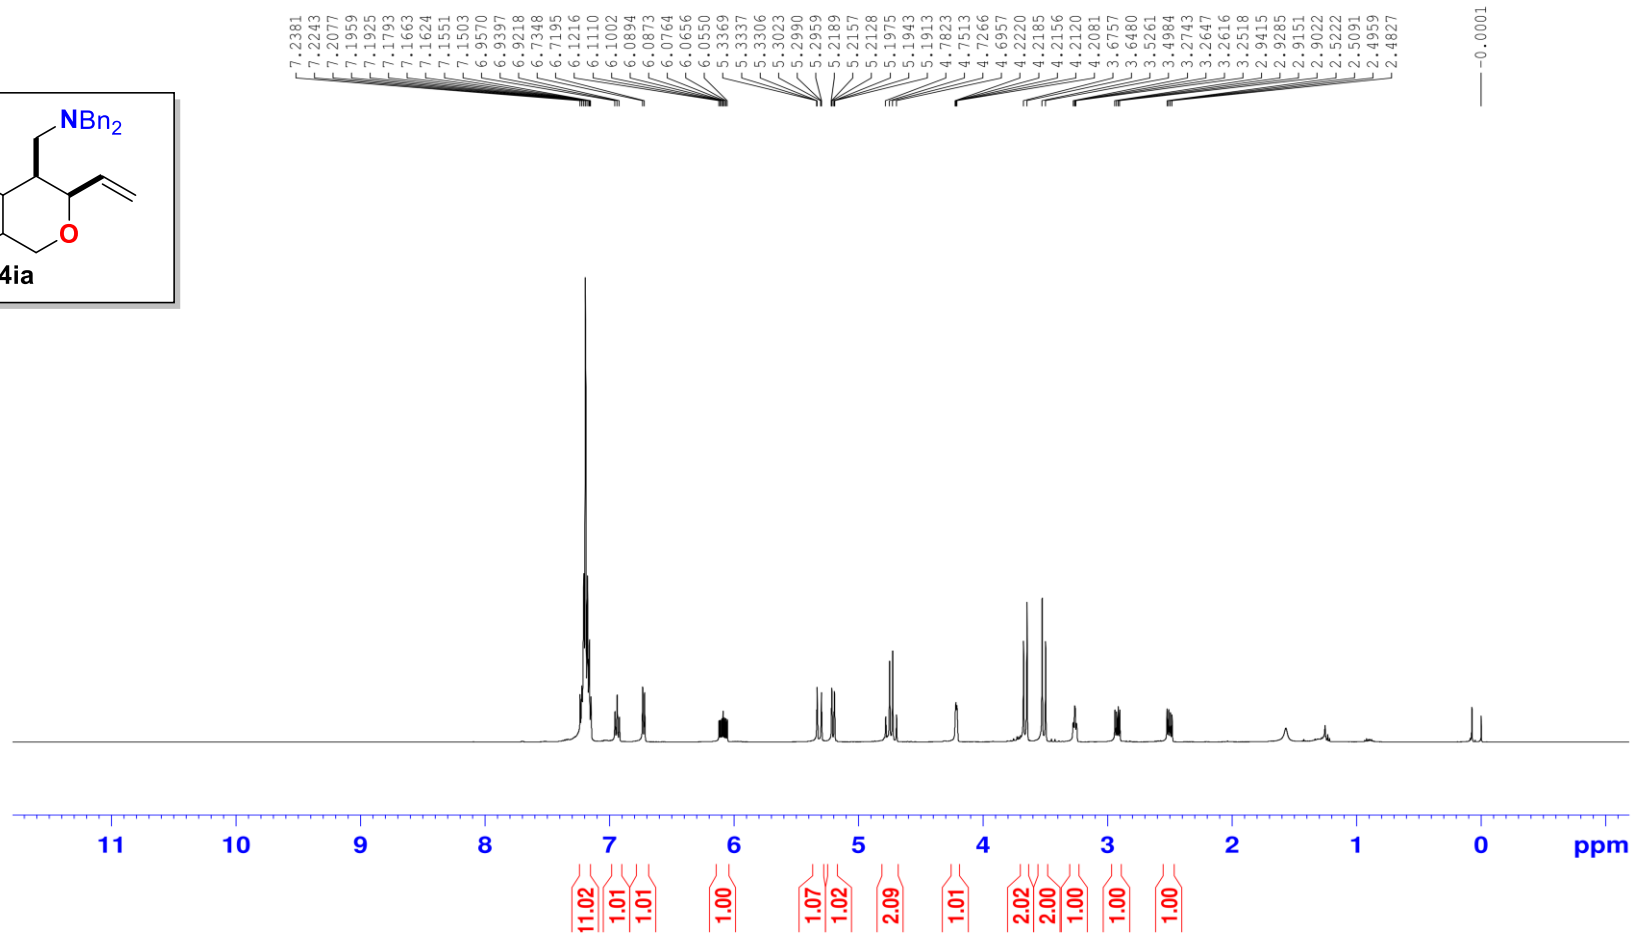

hy-P-4ia <sup>13</sup>C NMR (125MHz CDCl<sub>3</sub>)

yxy-x200714-2-6-f-c

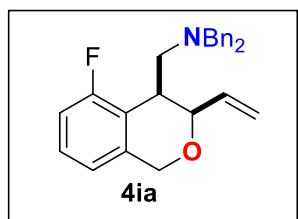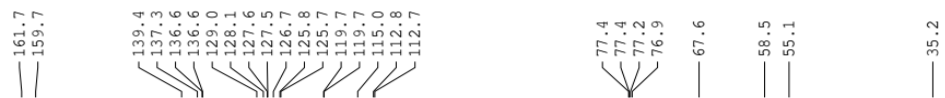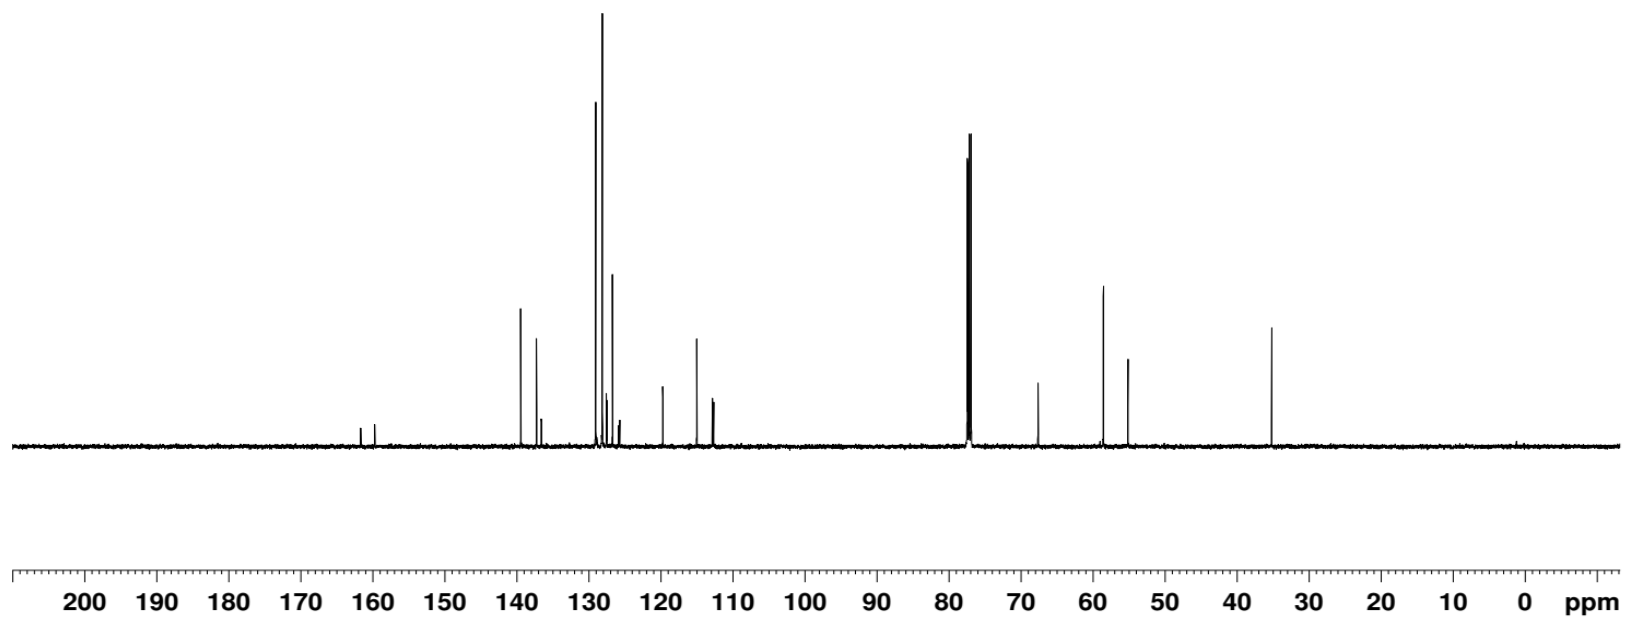

hy-P-4ia <sup>19</sup>F NMR (470MHz CDCl<sub>3</sub>)

YYY-X200714-2-6F-up-FNMR in CDCl<sub>3</sub>

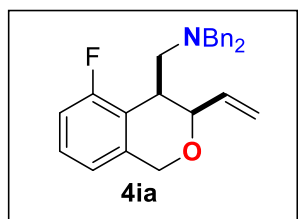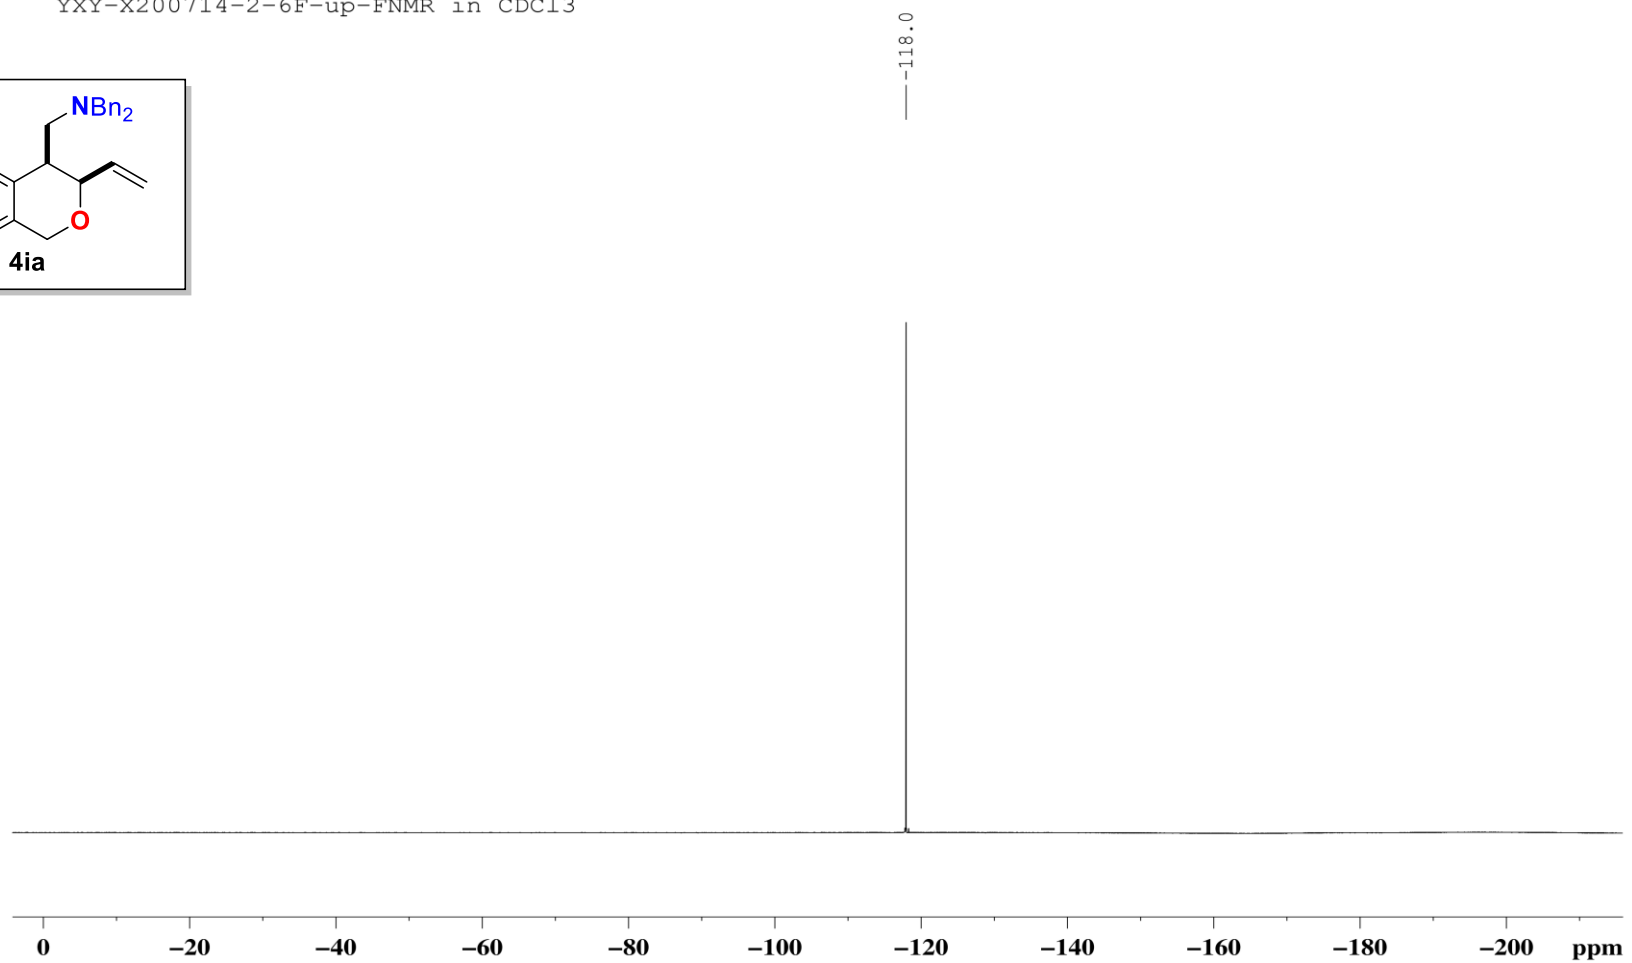



hy-P-4ja <sup>1</sup>H NMR (400MHz CDCl<sub>3</sub>)

yxy-x200713-6-cl-2

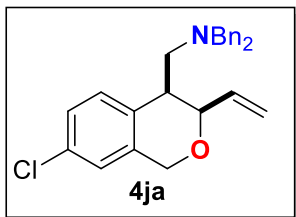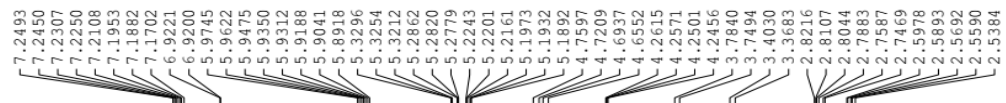

0.0000

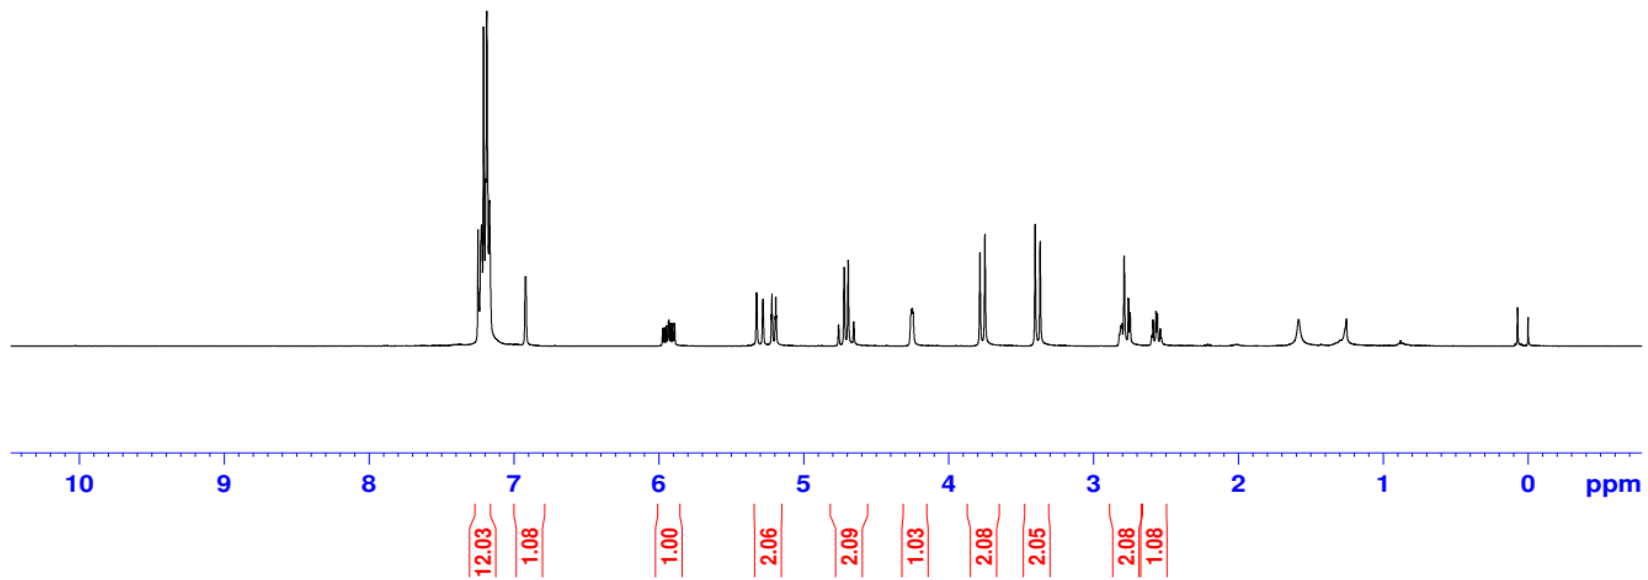

hy-P-4ja <sup>13</sup>C NMR (125MHz CDCl<sub>3</sub>)

YXY-X200713-6-Cl-up-CNMR in CDCl<sub>3</sub>

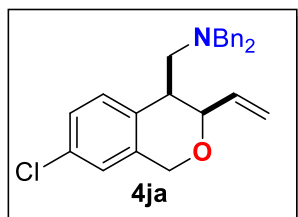

139.2  
136.6  
136.1  
135.6  
132.1  
131.8  
128.8  
128.3  
126.9  
125.8  
123.9  
115.6

77.4  
77.2  
76.9  
67.5  
59.2  
55.3  
40.1

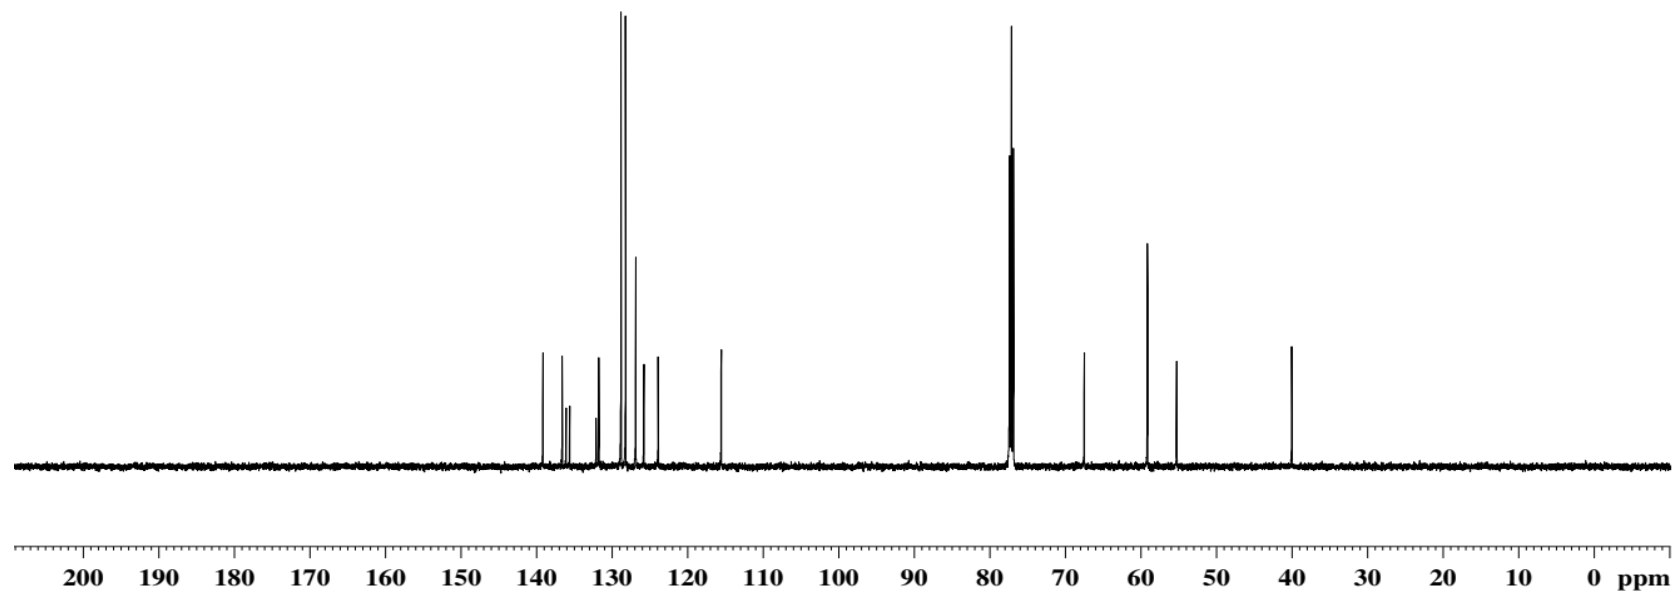

hy-P-4ka <sup>1</sup>H NMR (500MHz CDCl<sub>3</sub>)

yxy-x200714-3-cf3-2---

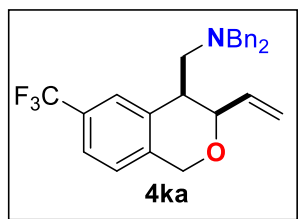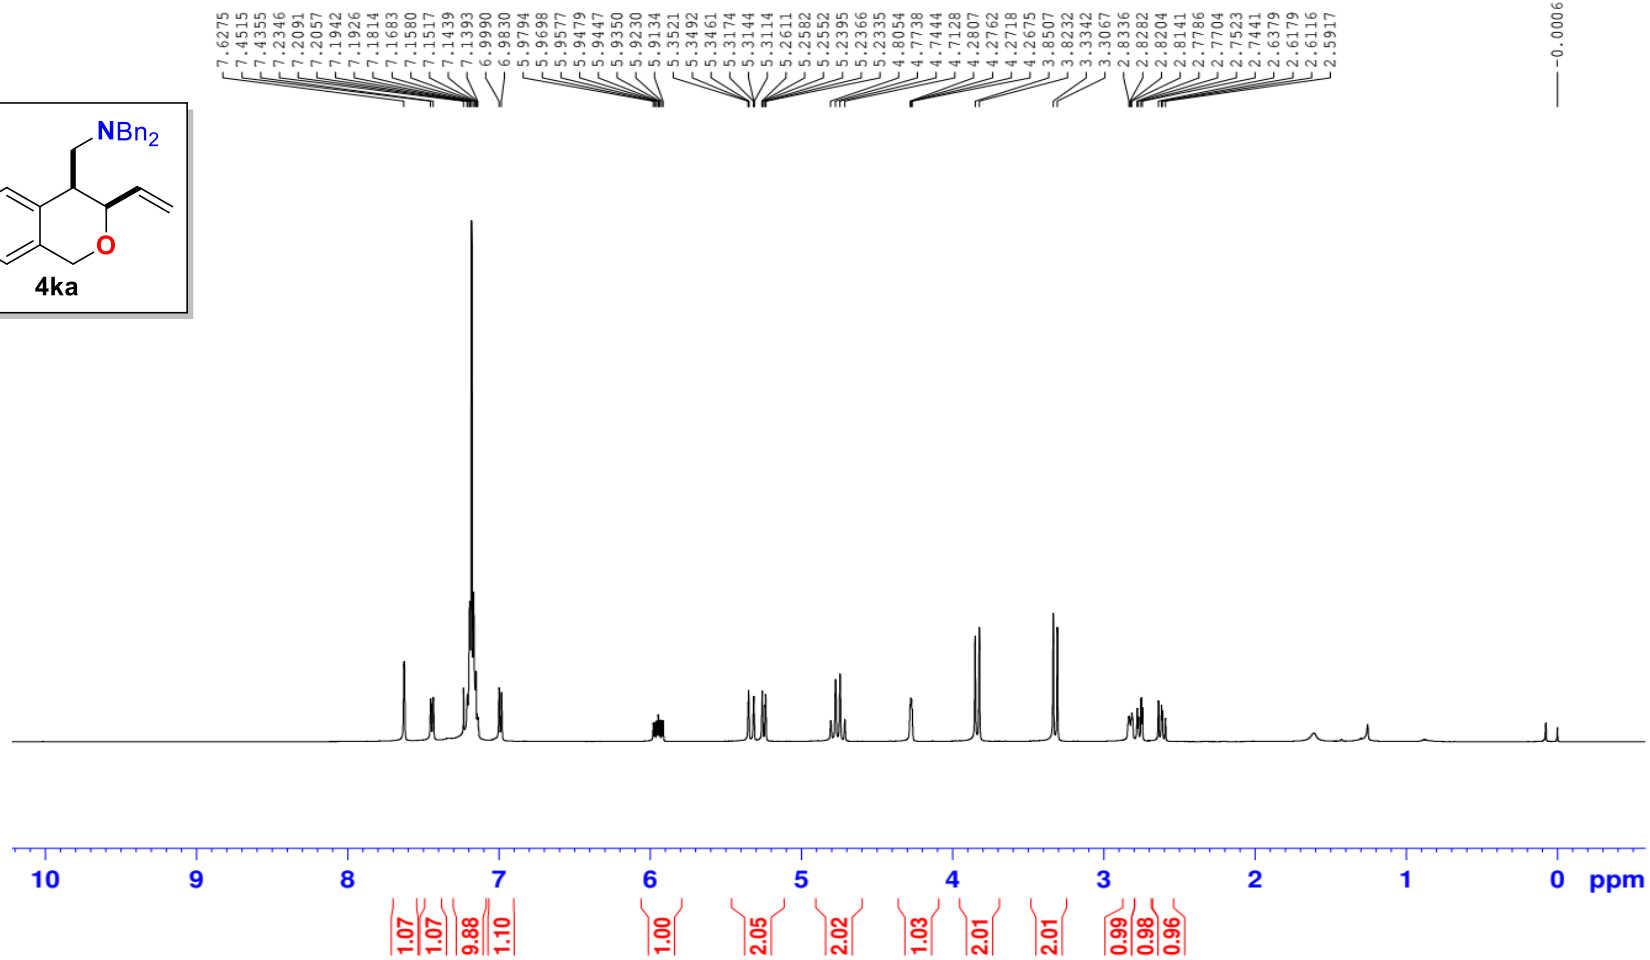

hy-P-4ka <sup>13</sup>C NMR (125MHz CDCl<sub>3</sub>)

yxy-x200714-3-5-cf3-c

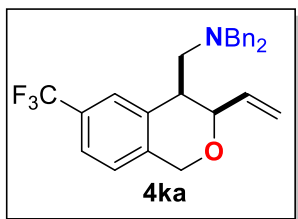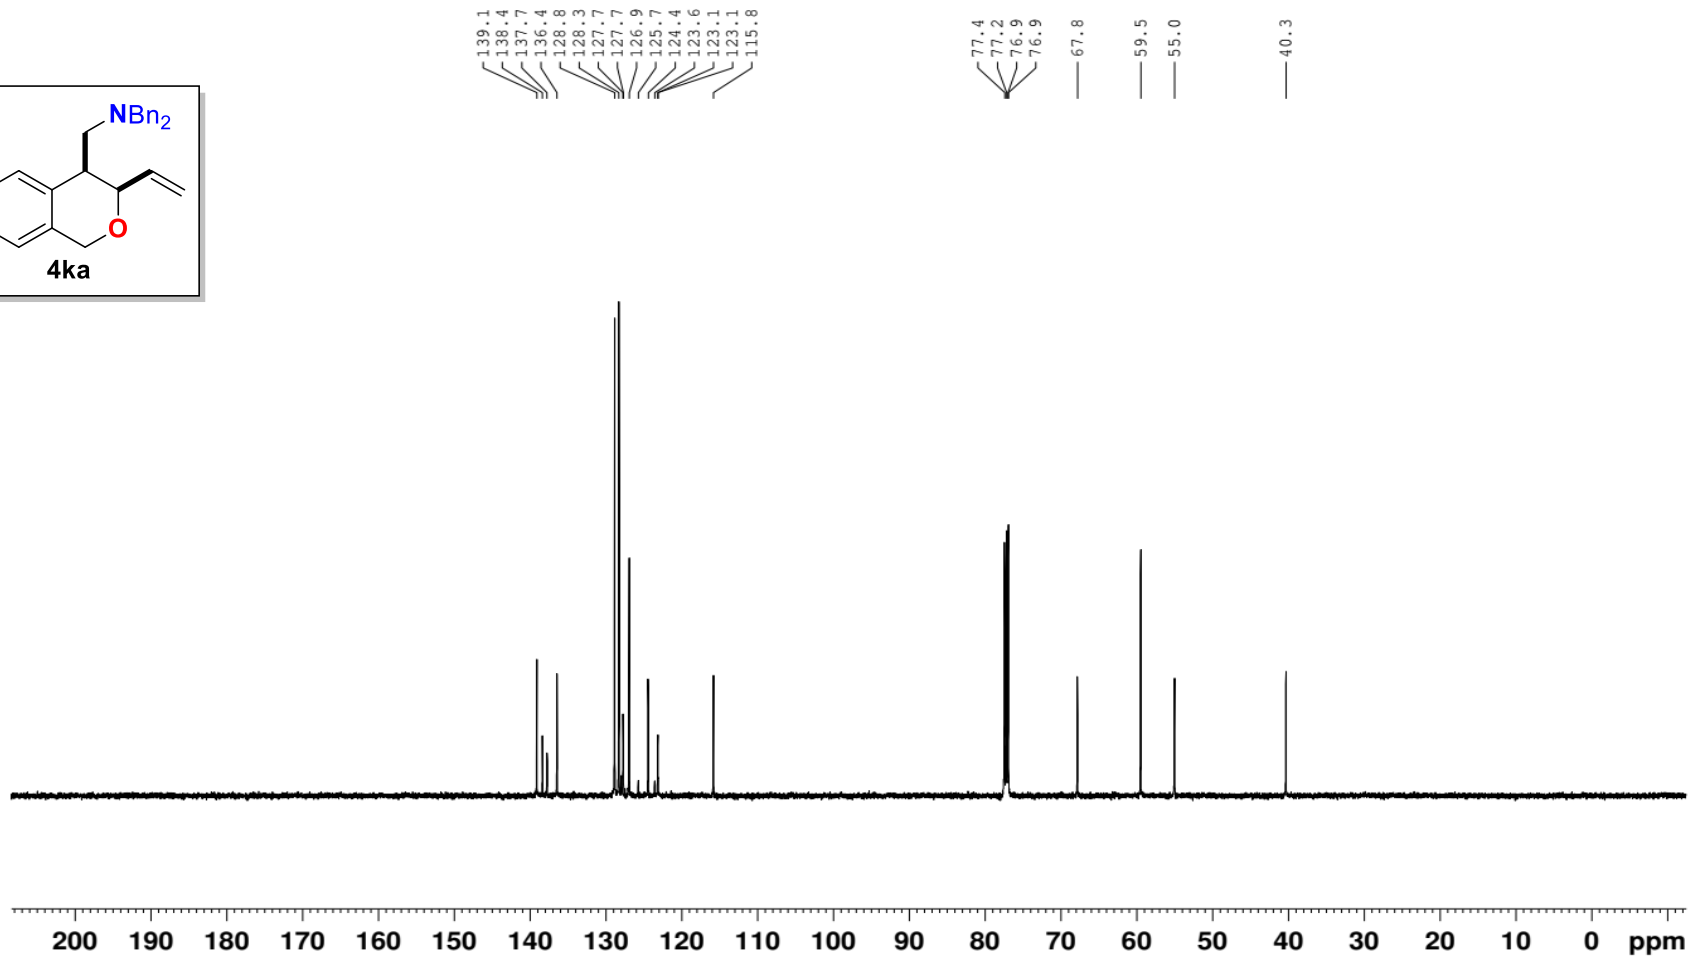

hy-P-4ka <sup>19</sup>F NMR (470MHz CDCl<sub>3</sub>)

YXY-X200714-3-5CF3-up-FNMR in CDCl<sub>3</sub>

-62.1000

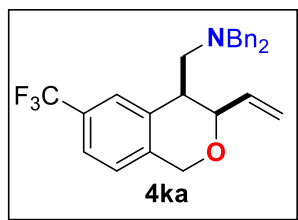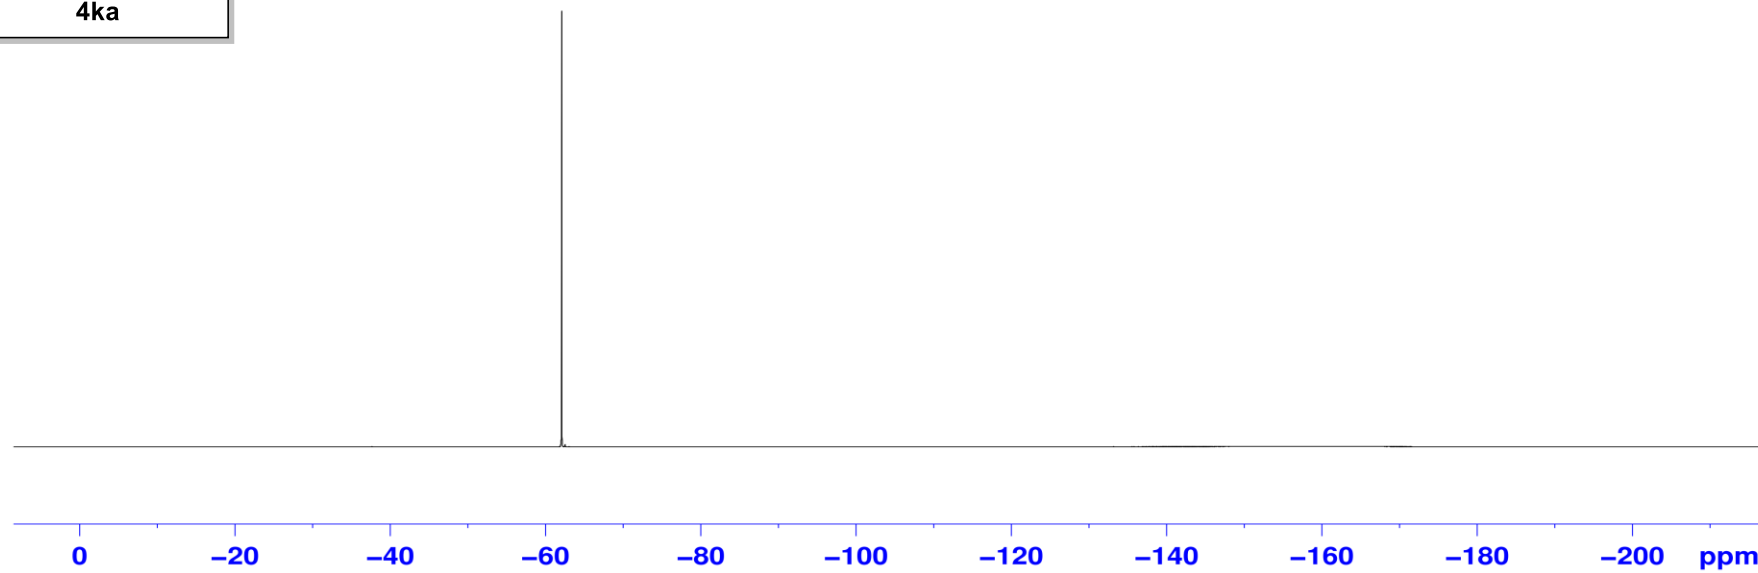

hy-P-4la <sup>1</sup>H NMR (400MHz CDCl<sub>3</sub>)

hy-x200721-2-h-nai

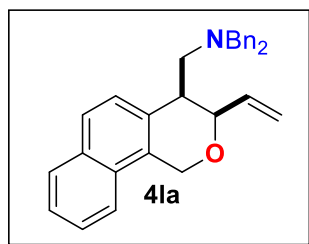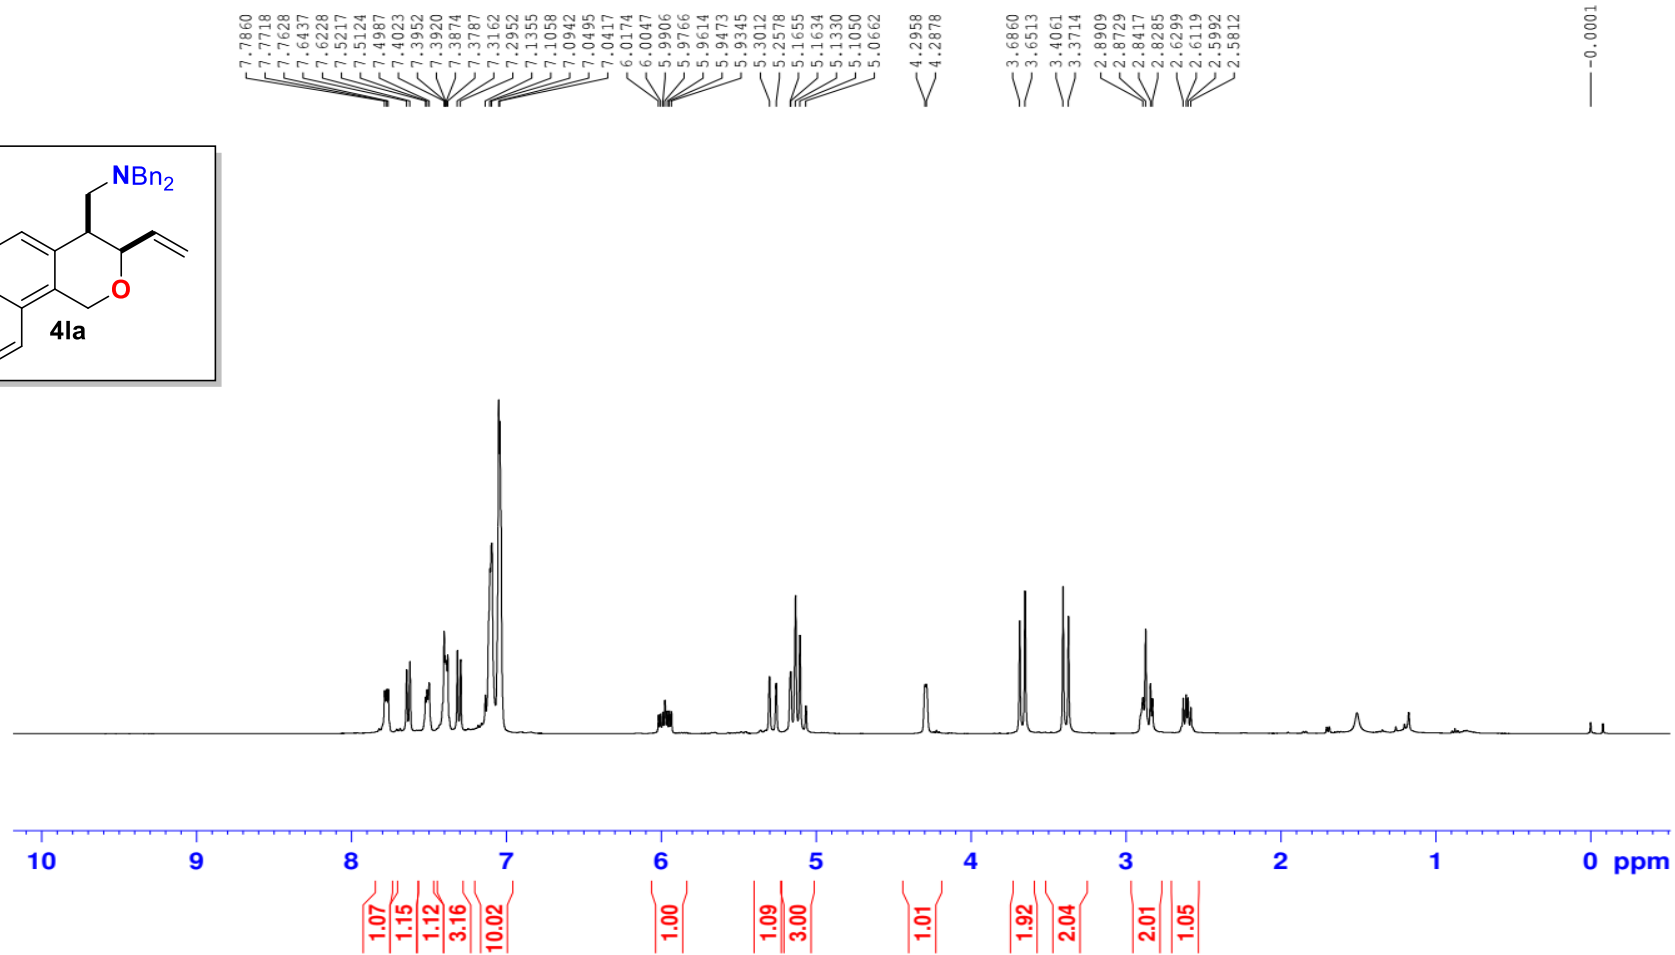

hy-P-4la <sup>13</sup>C NMR (125MHz CDCl<sub>3</sub>)

hy-x200721-2-nai-c-

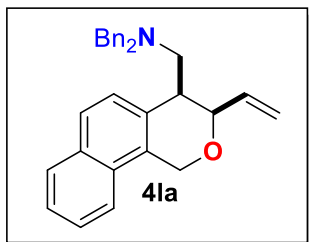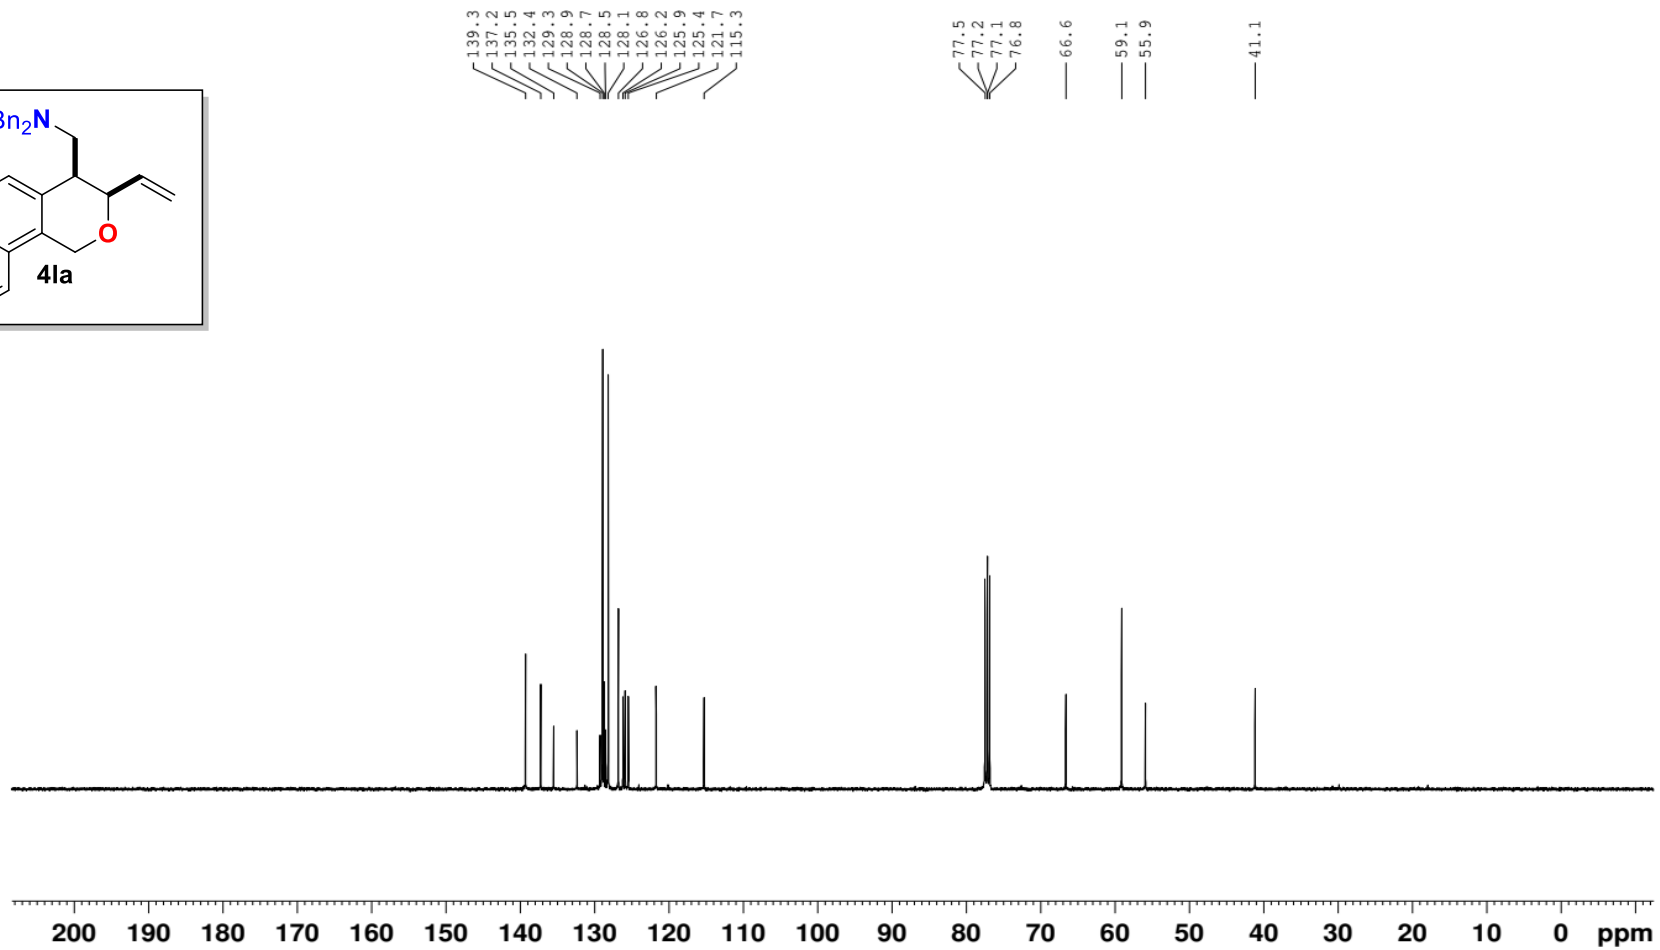

hy-P-4ma <sup>1</sup>H NMR (500MHz CDCl<sub>3</sub>)

yxy-x200720-2-ph---

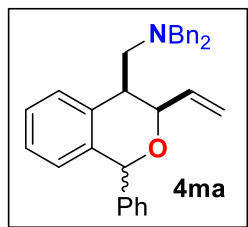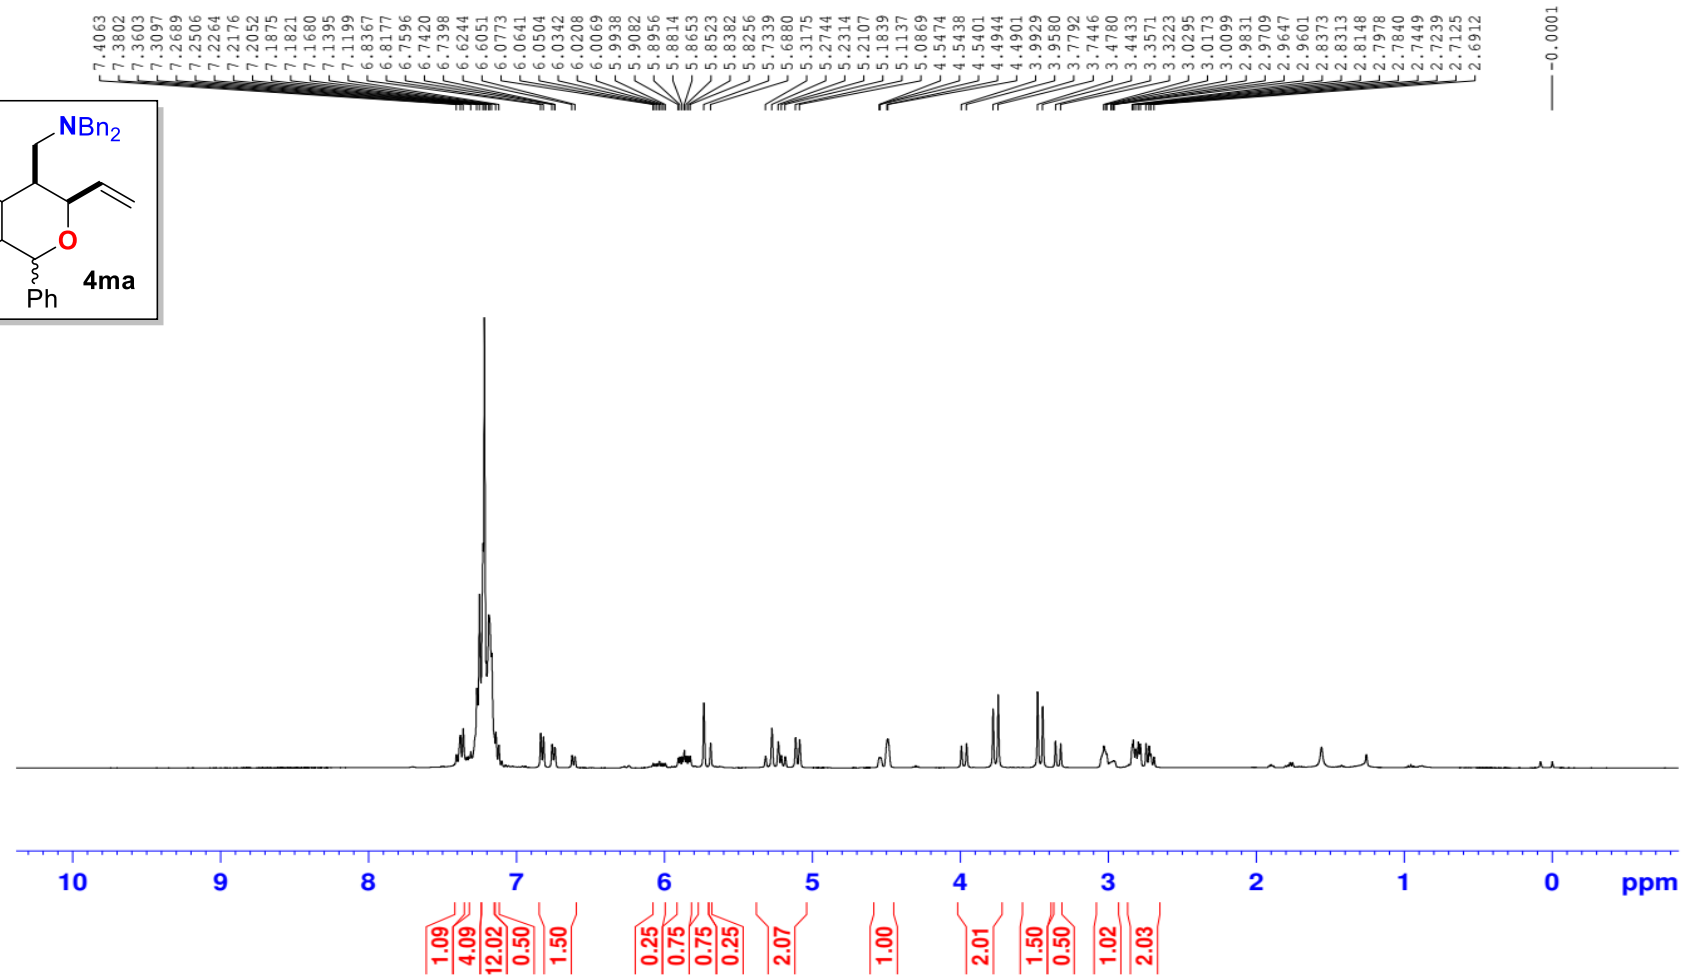

— -0.0001



yxy-x200720-2-ph-c-

hy-P-4ma <sup>13</sup>C NMR (125MHz CDCl<sub>3</sub>)

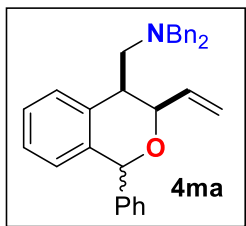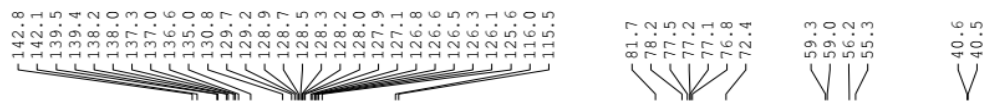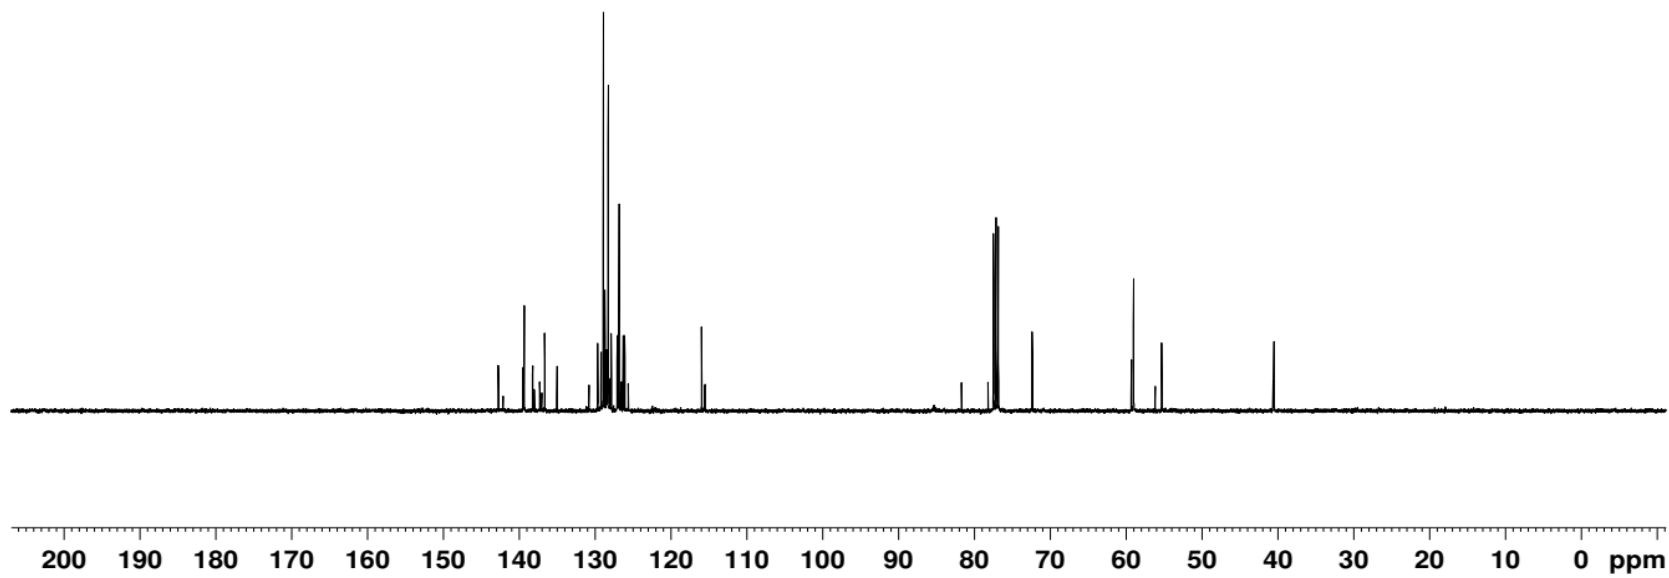

hy-P-4na <sup>1</sup>H NMR (400MHz CDCl<sub>3</sub>)

yxy-x200720-3-up---

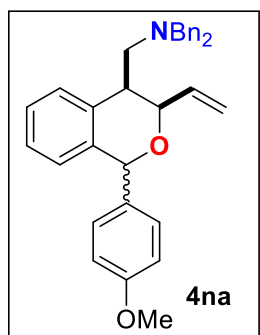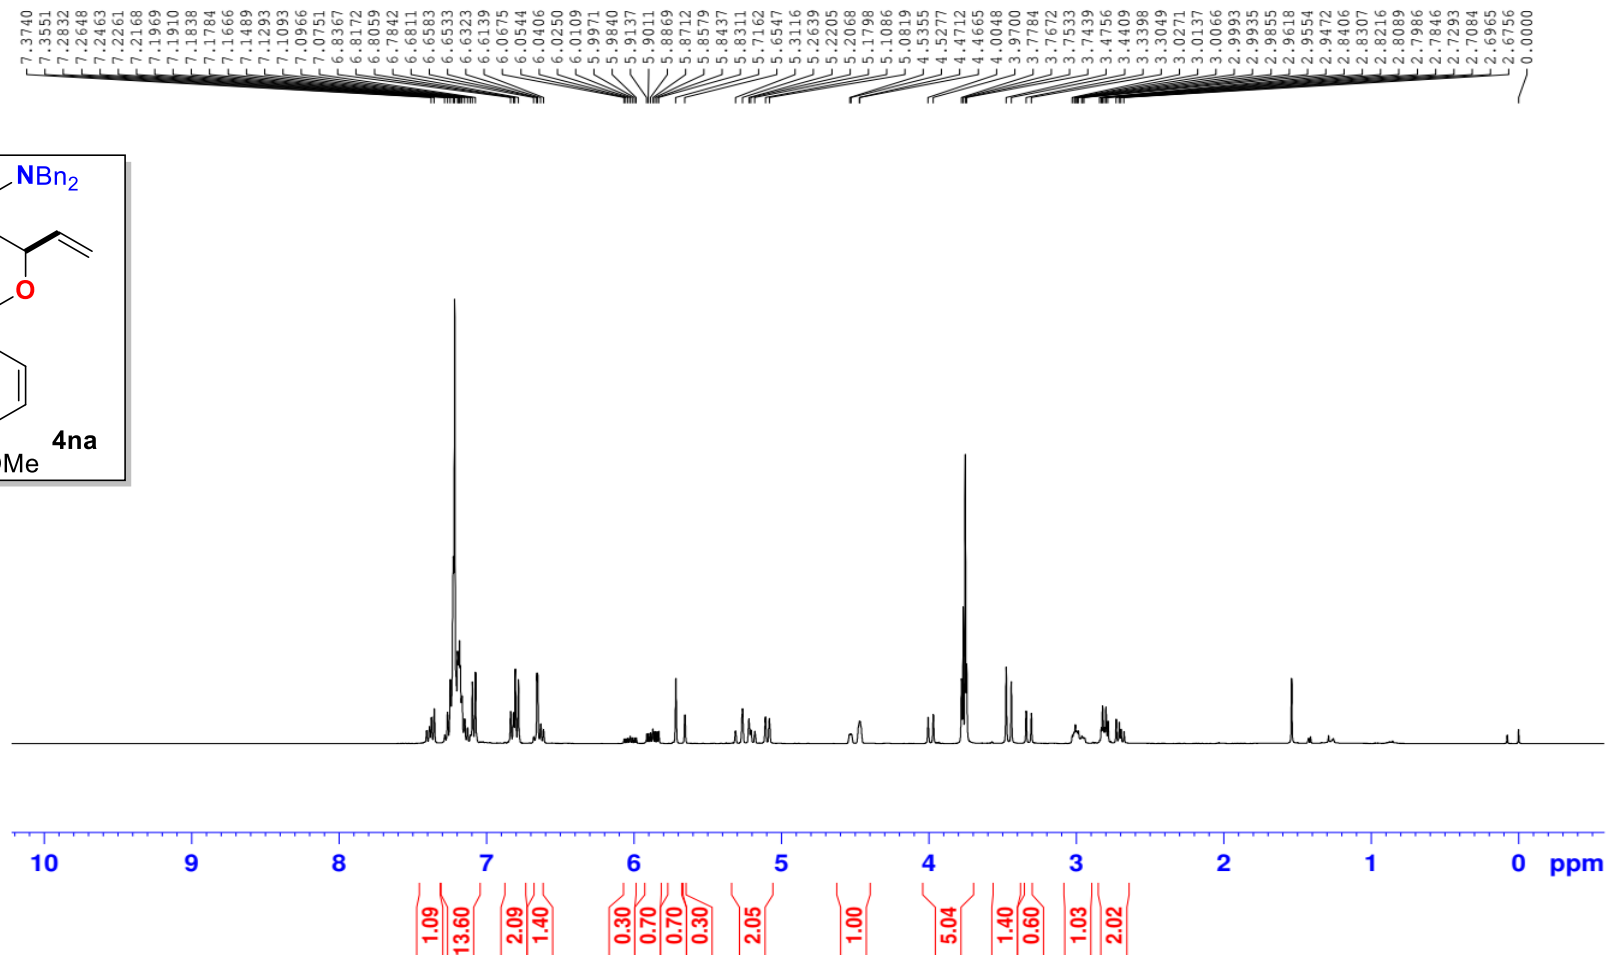

hy-P-4na <sup>13</sup>C NMR (100MHz CDCl<sub>3</sub>)

yxy-x200720-3-c-

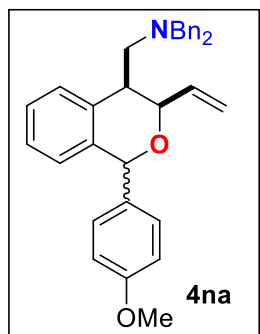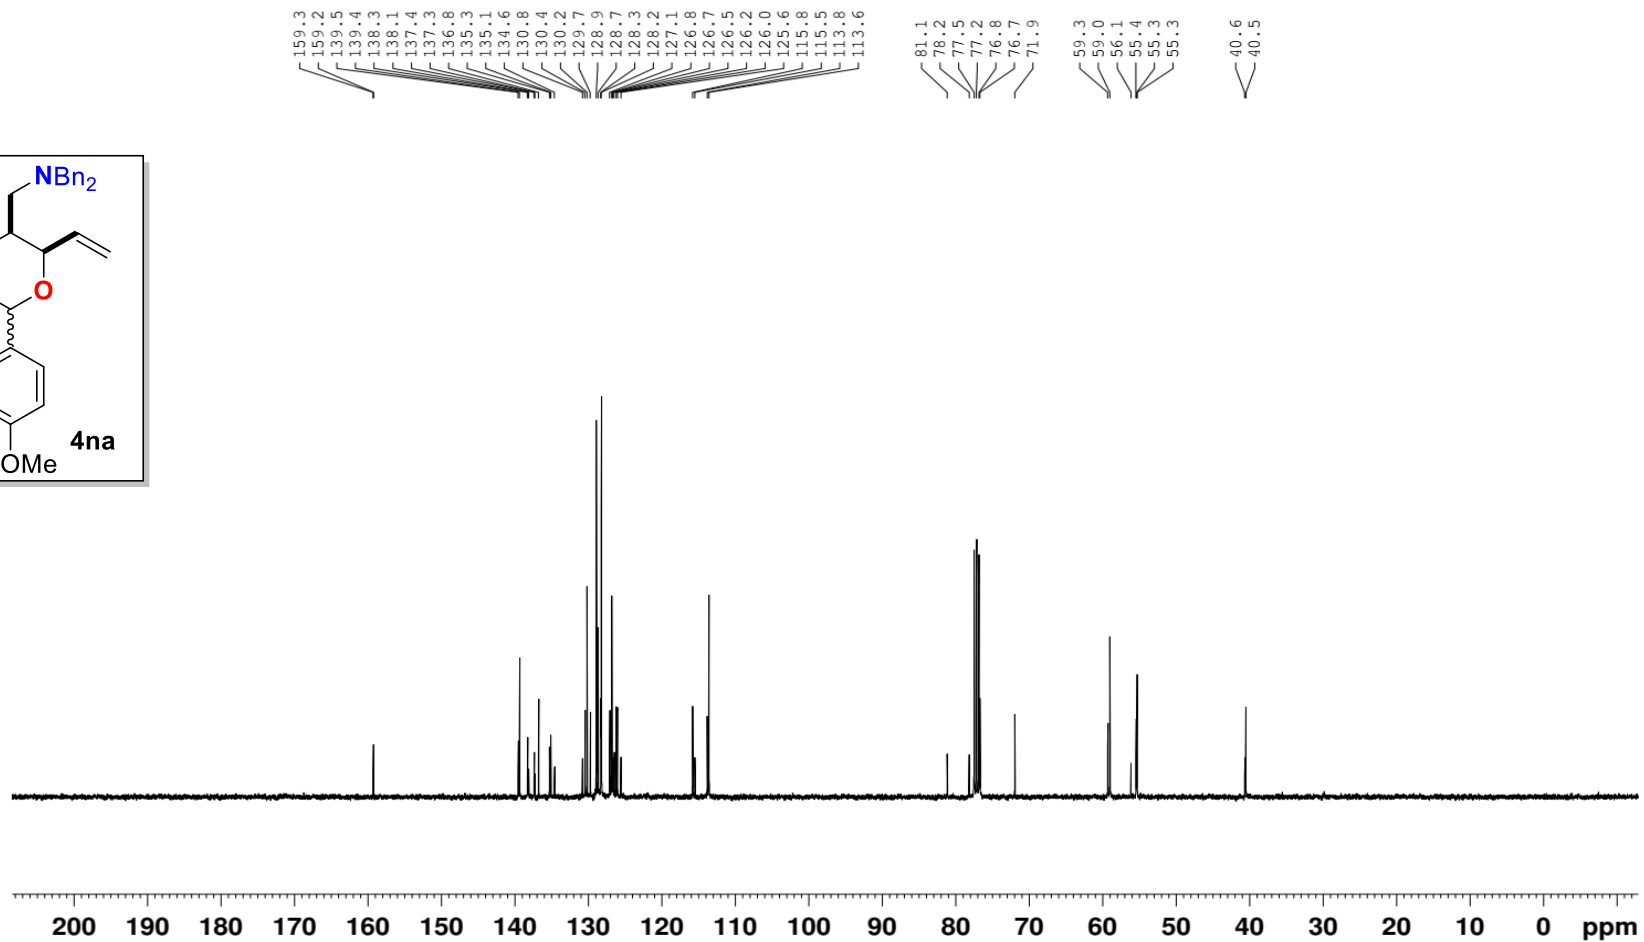

hy-P-4oa <sup>1</sup>H NMR (400MHz CDCl<sub>3</sub>)

yxy-x200720-6-dich3

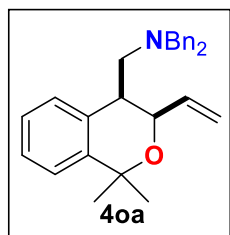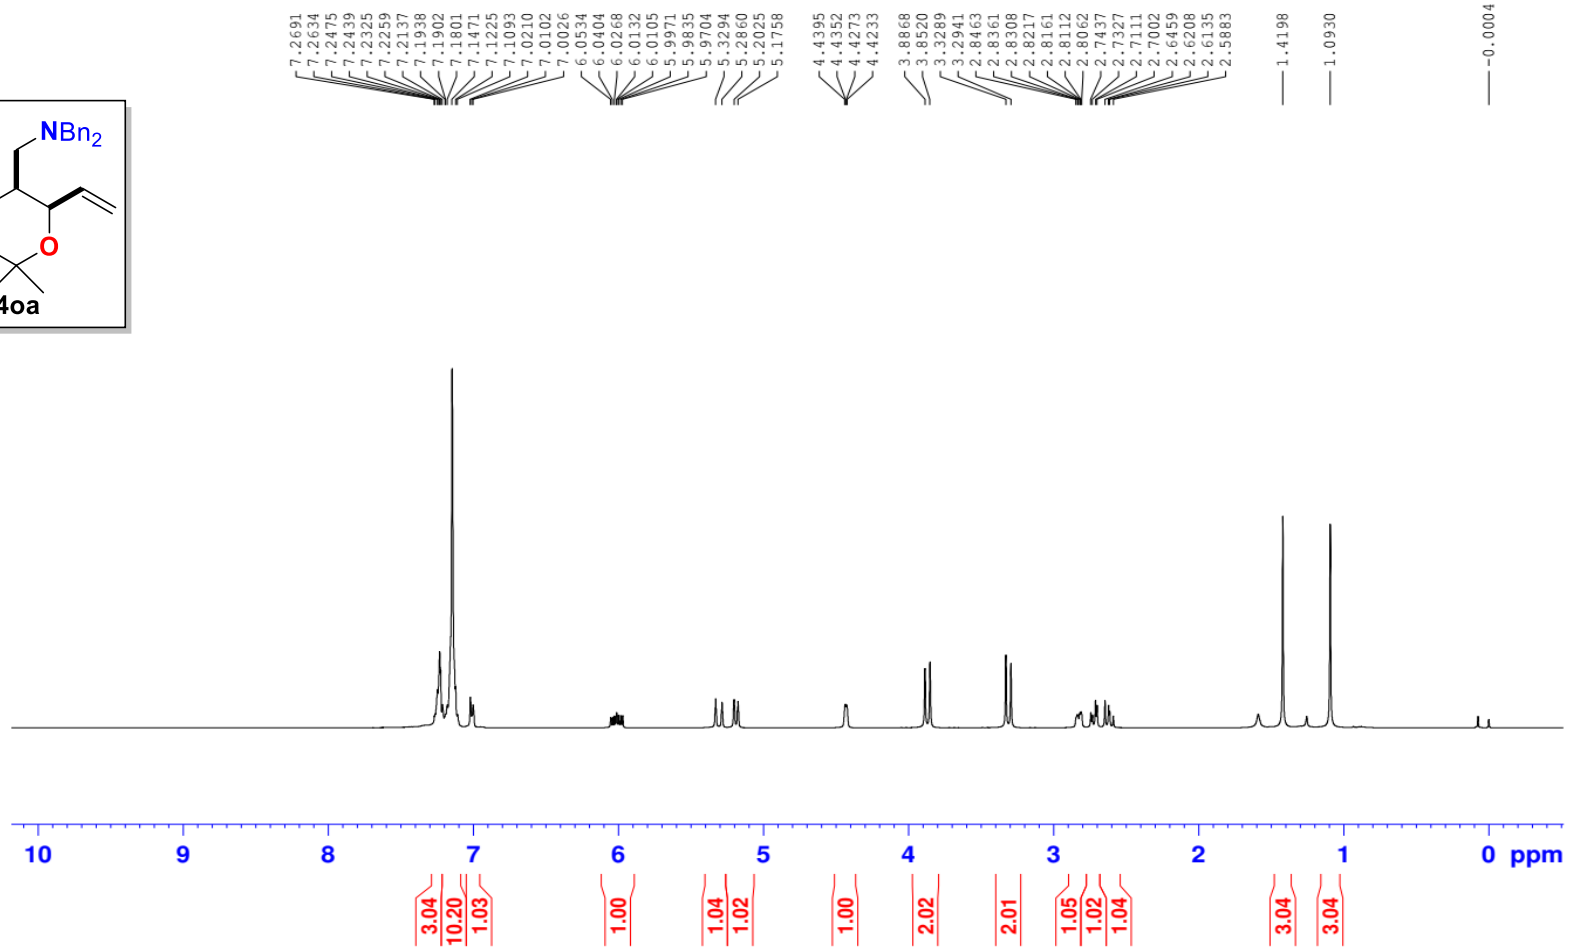

yxy-x200720-6-xoh-c-

hy-P-4oa <sup>13</sup>C NMR (125MHz CDCl<sub>3</sub>)

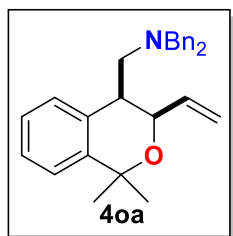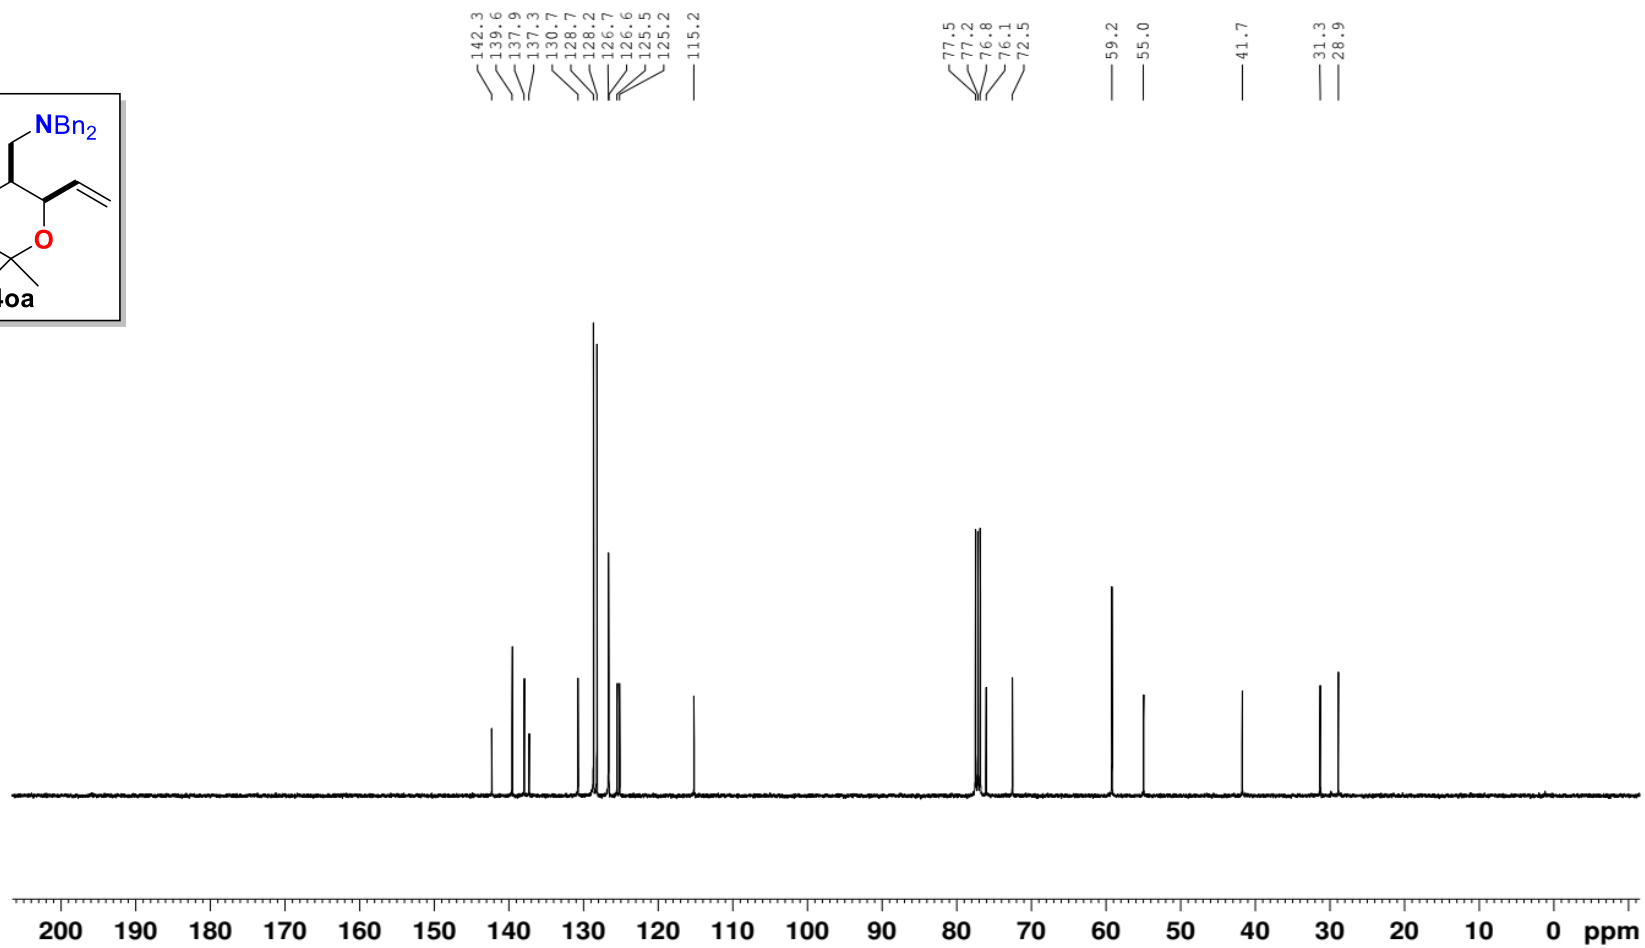

hy-P-4qa <sup>1</sup>H NMR (400MHz CDCl<sub>3</sub>)

hy-cis-diene-ch3-h

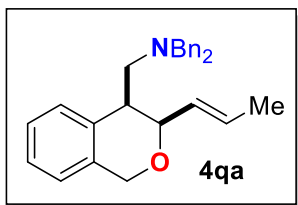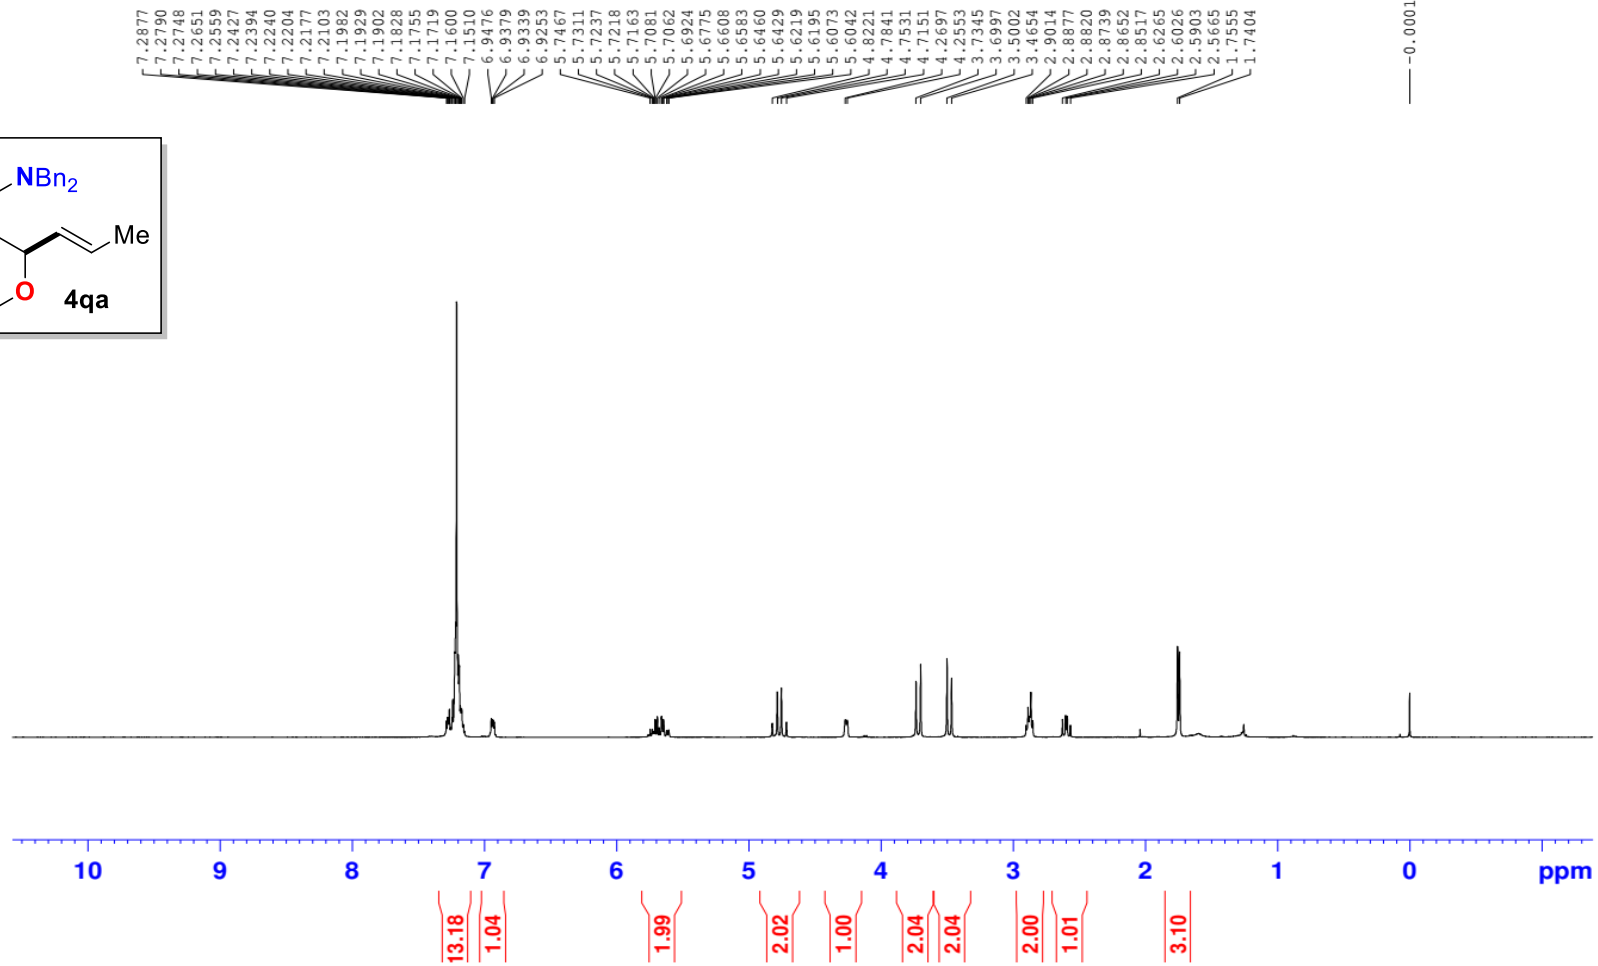

hy-P-4qa <sup>13</sup>C NMR (100MHz CDCl<sub>3</sub>)

hy-cis-diene-ch3-c

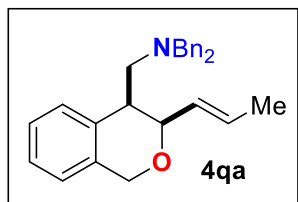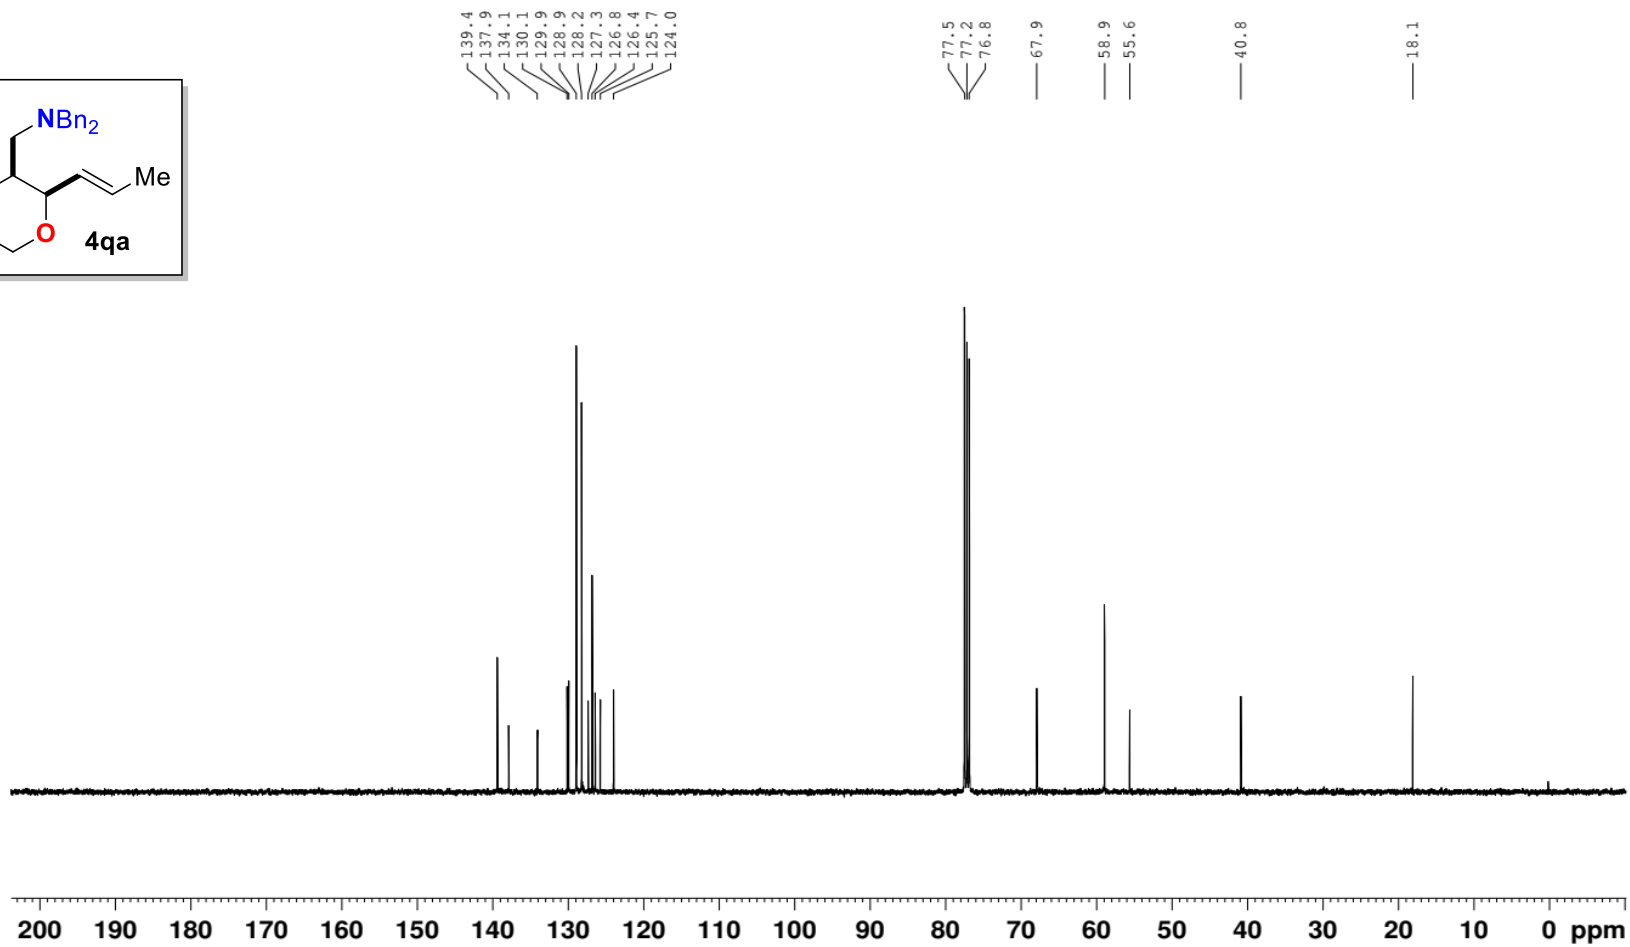

hy-P-5aa <sup>1</sup>H NMR (400MHz CDCl<sub>3</sub>)

hy-diene-5-ring-h-

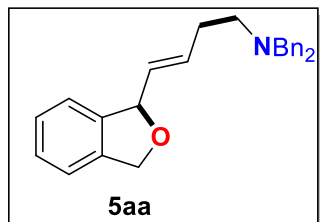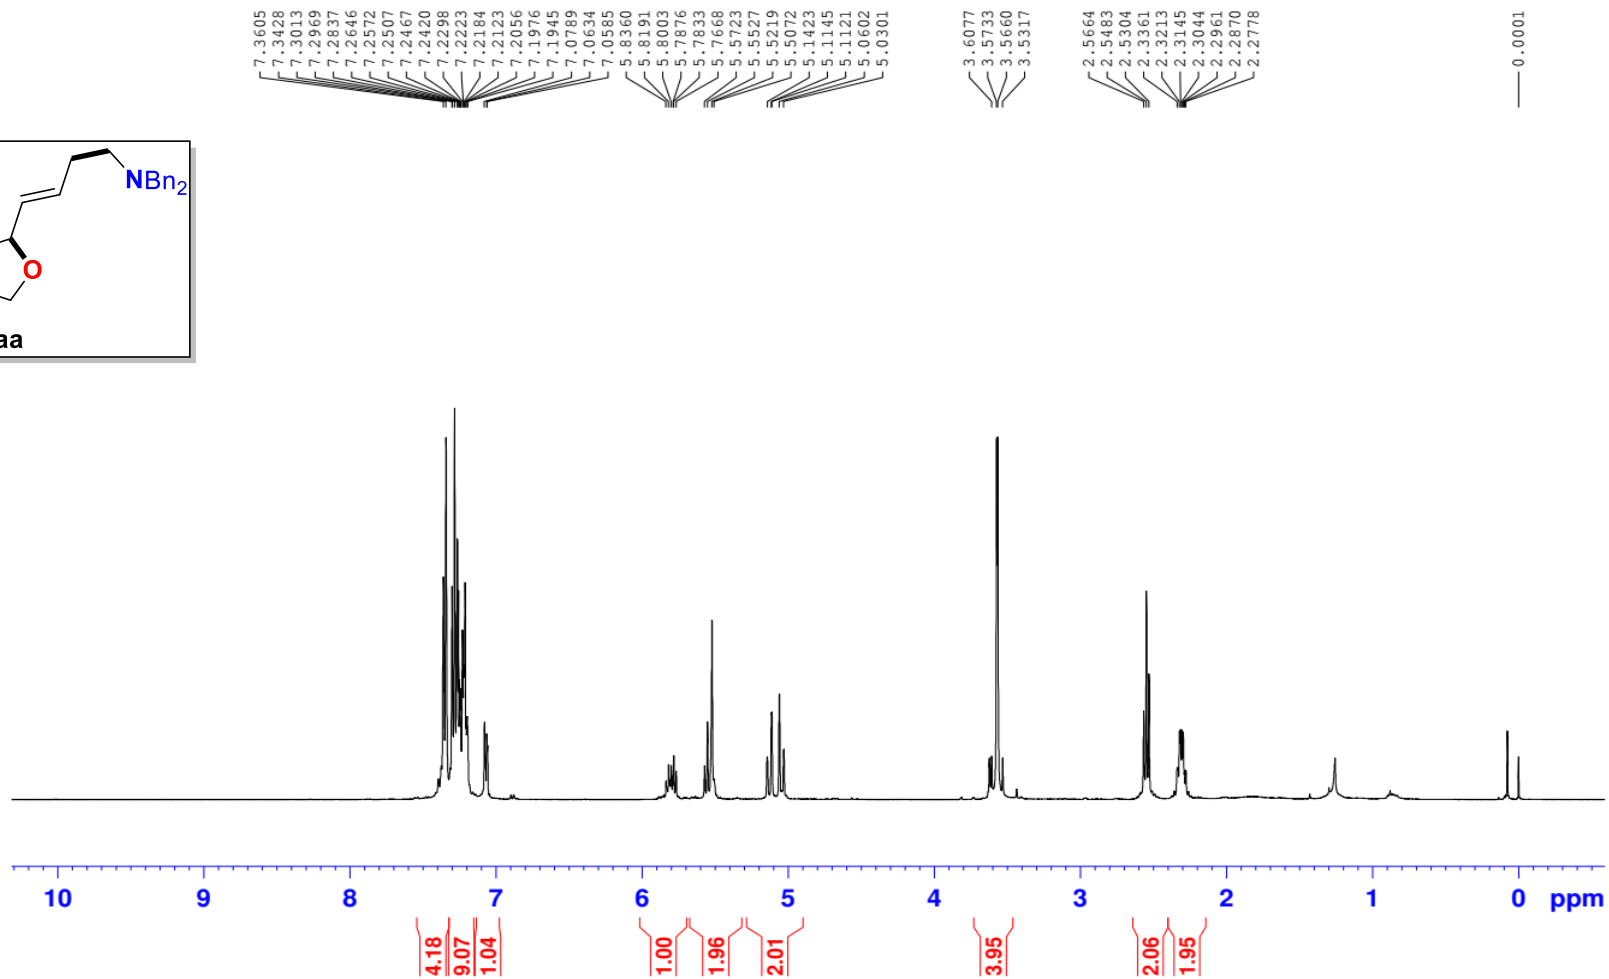



hy-P-5aa <sup>13</sup>C NMR (125MHz CDCl<sub>3</sub>)

hy-diene-5-ring-c

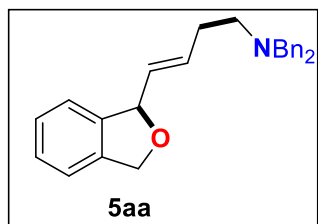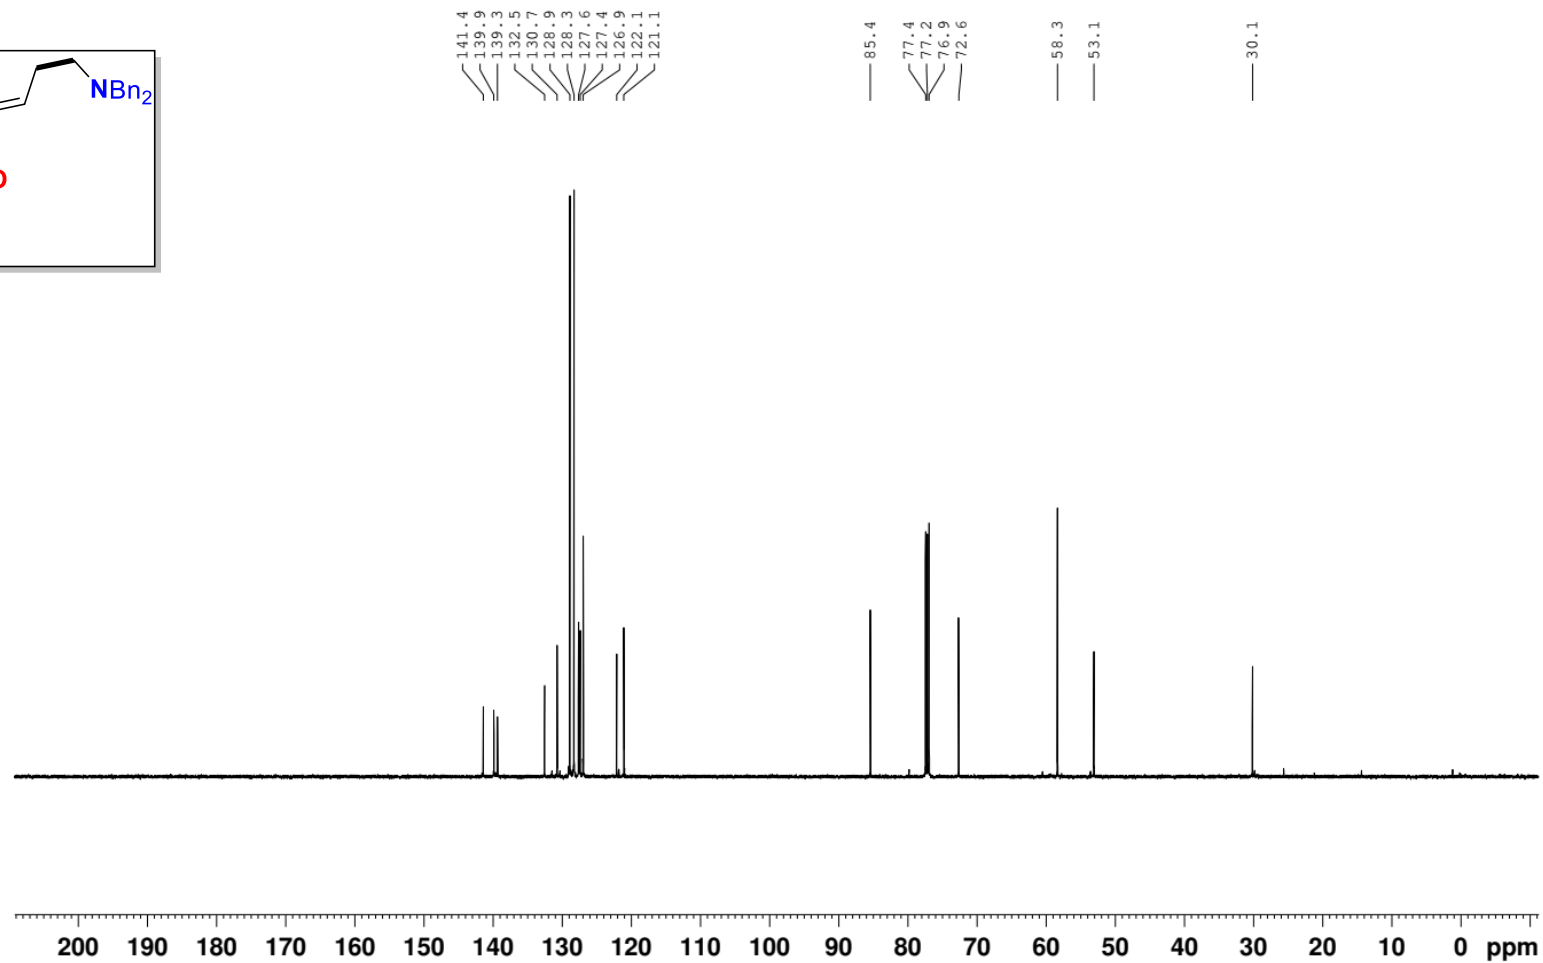

hy-P-6 <sup>1</sup>H NMR (500MHz CDCl<sub>3</sub>)

hy-x200701-trans-tuobian

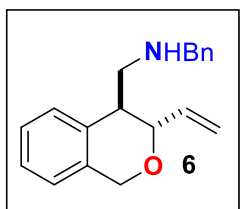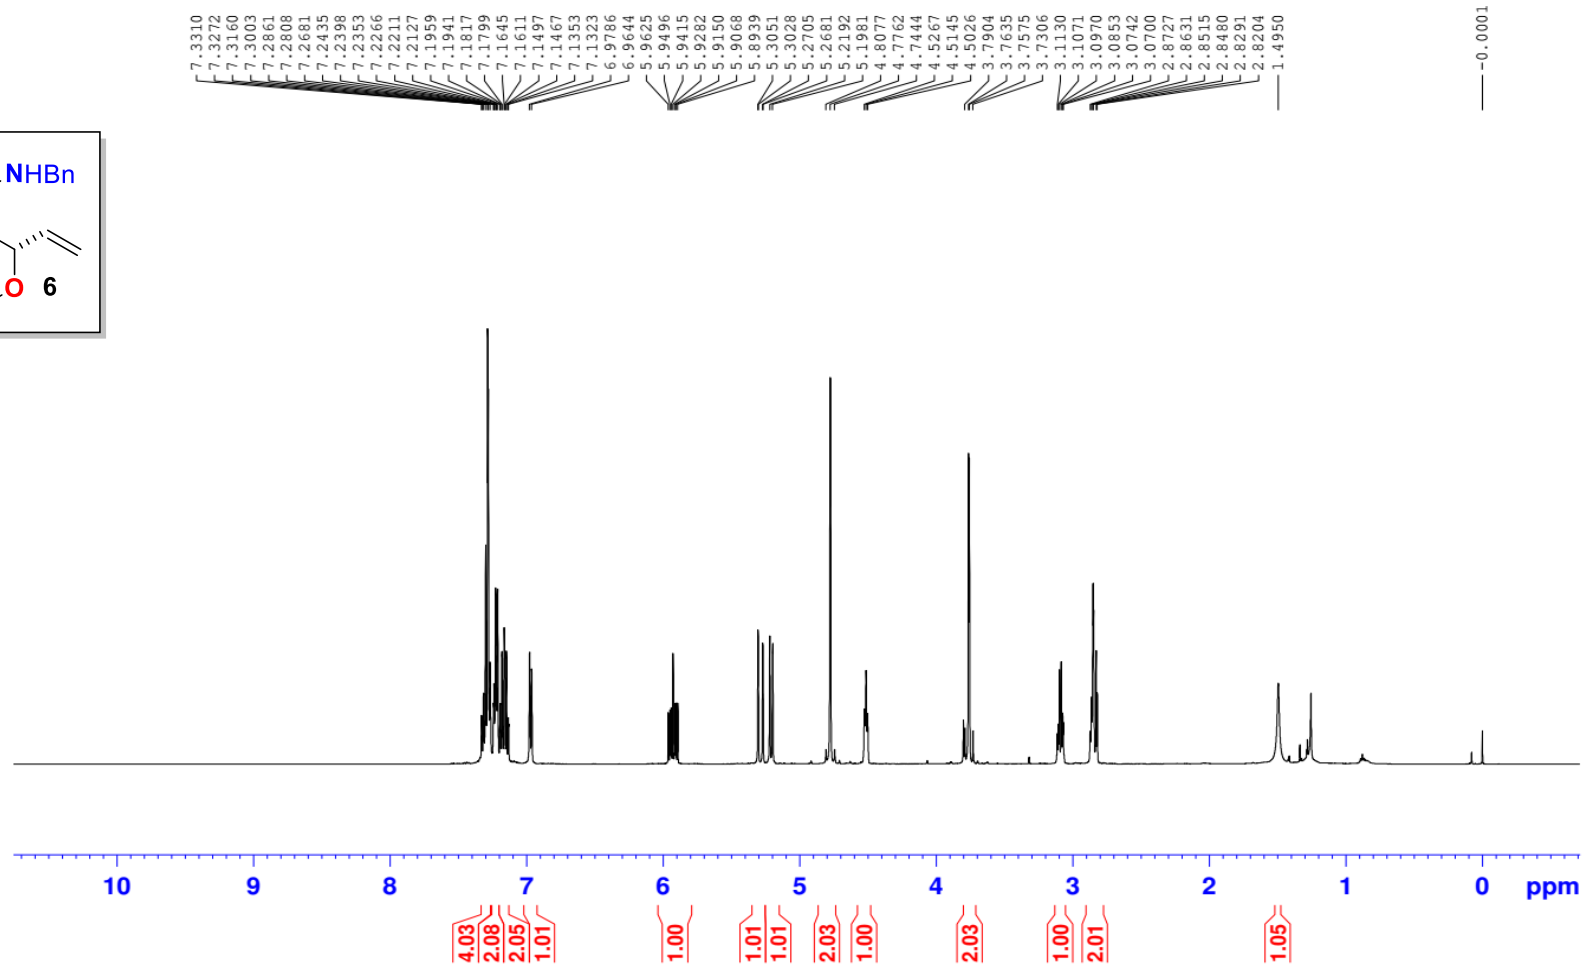

hy-P-6 <sup>13</sup>C NMR (125MHz CDCl<sub>3</sub>)

hy-x210701-trans-tuobian-c--

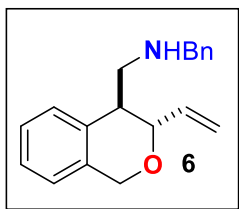

140.5  
137.1  
135.3  
134.6  
128.4  
128.2  
128.0  
127.0  
126.9  
126.2  
124.4  
118.3

77.4  
77.2  
76.9  
76.5

65.5

54.1  
51.4

41.6

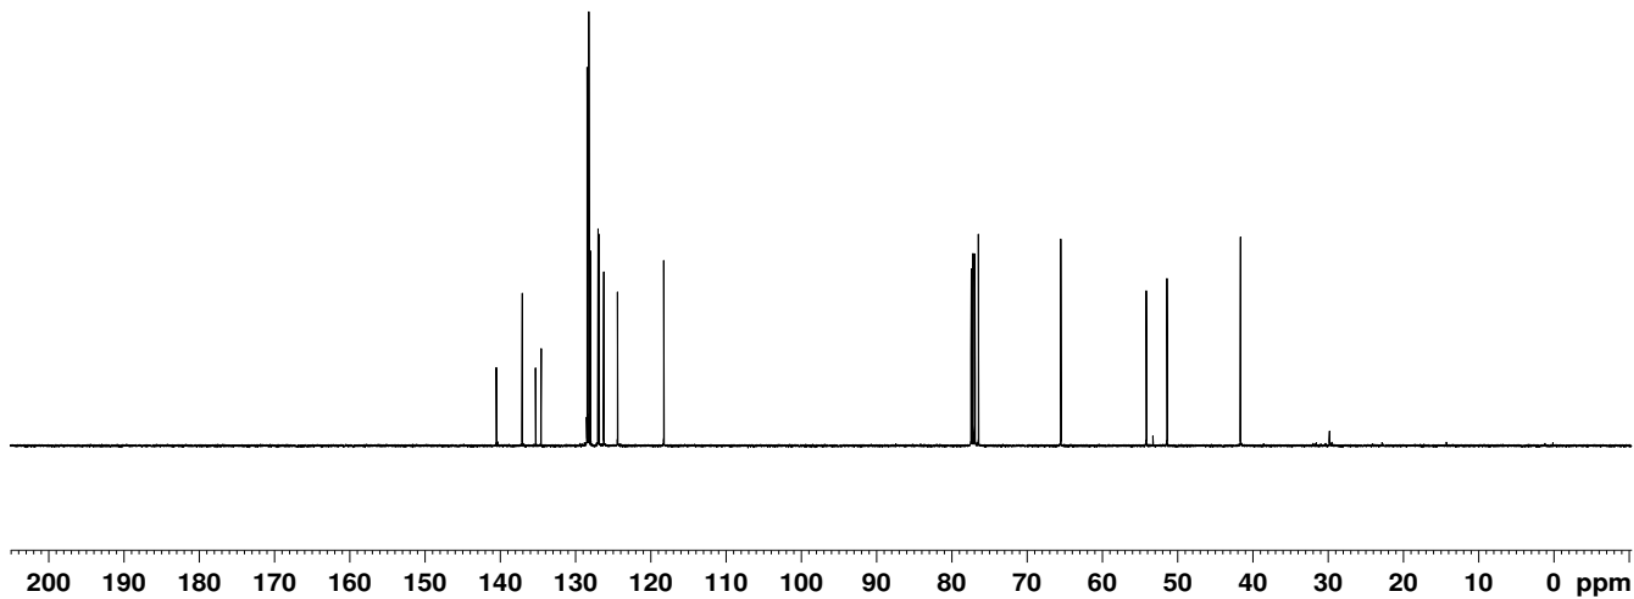

hy-P-7 <sup>1</sup>H NMR (400MHz CDCl<sub>3</sub>)

hy-4aa-nns-h--

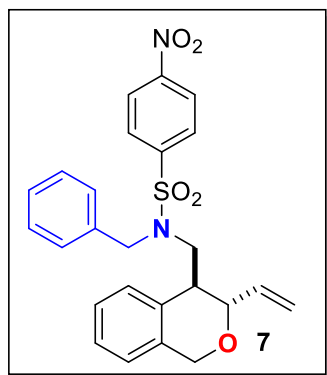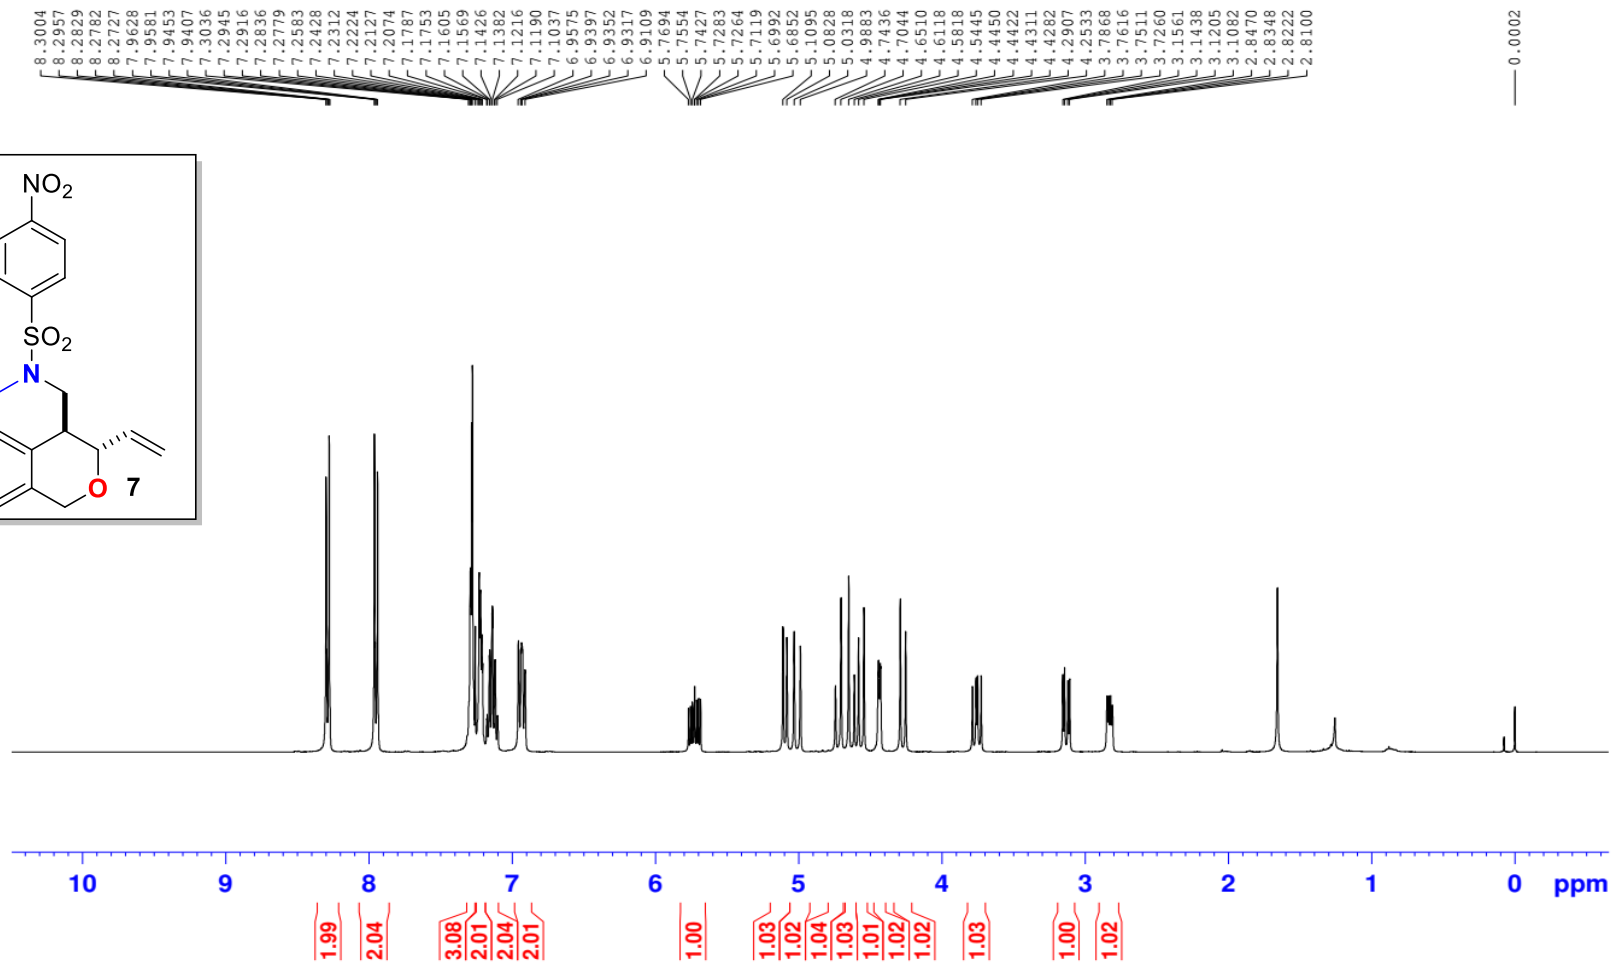

hy-P-7 <sup>13</sup>C NMR (100MHz CDCl<sub>3</sub>)

hy-4aa-nns-c-

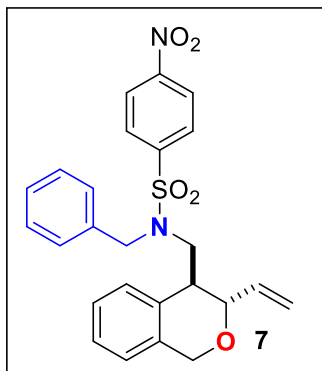

150.0  
145.6  
135.5  
135.1  
134.6  
132.3  
129.6  
129.0  
128.6  
128.5  
128.4  
127.1  
126.8  
124.4  
124.3  
119.1

77.4  
77.2  
76.9  
72.0

62.3

54.1  
53.8

40.0

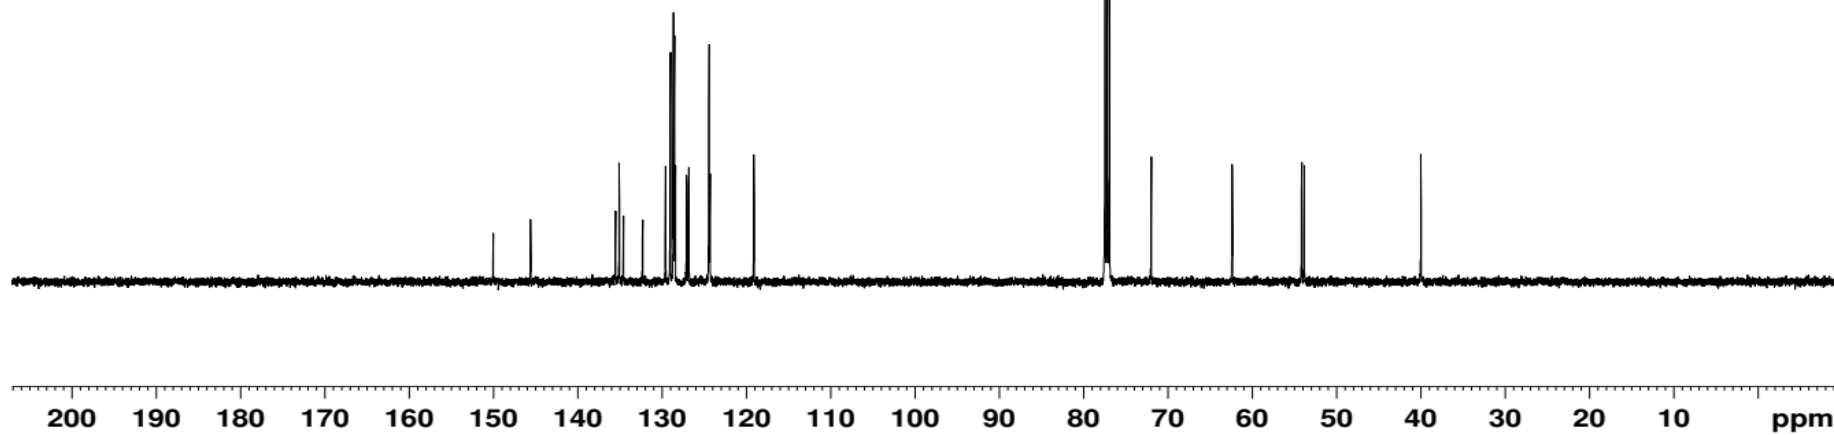

hy-P-8 <sup>1</sup>H NMR (500MHz CDCl<sub>3</sub>)

hy-4aa-nts-h

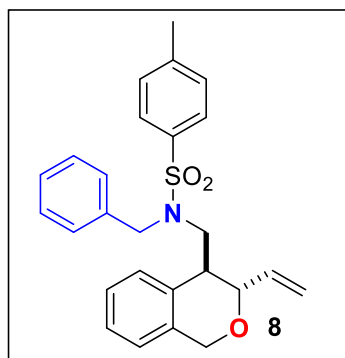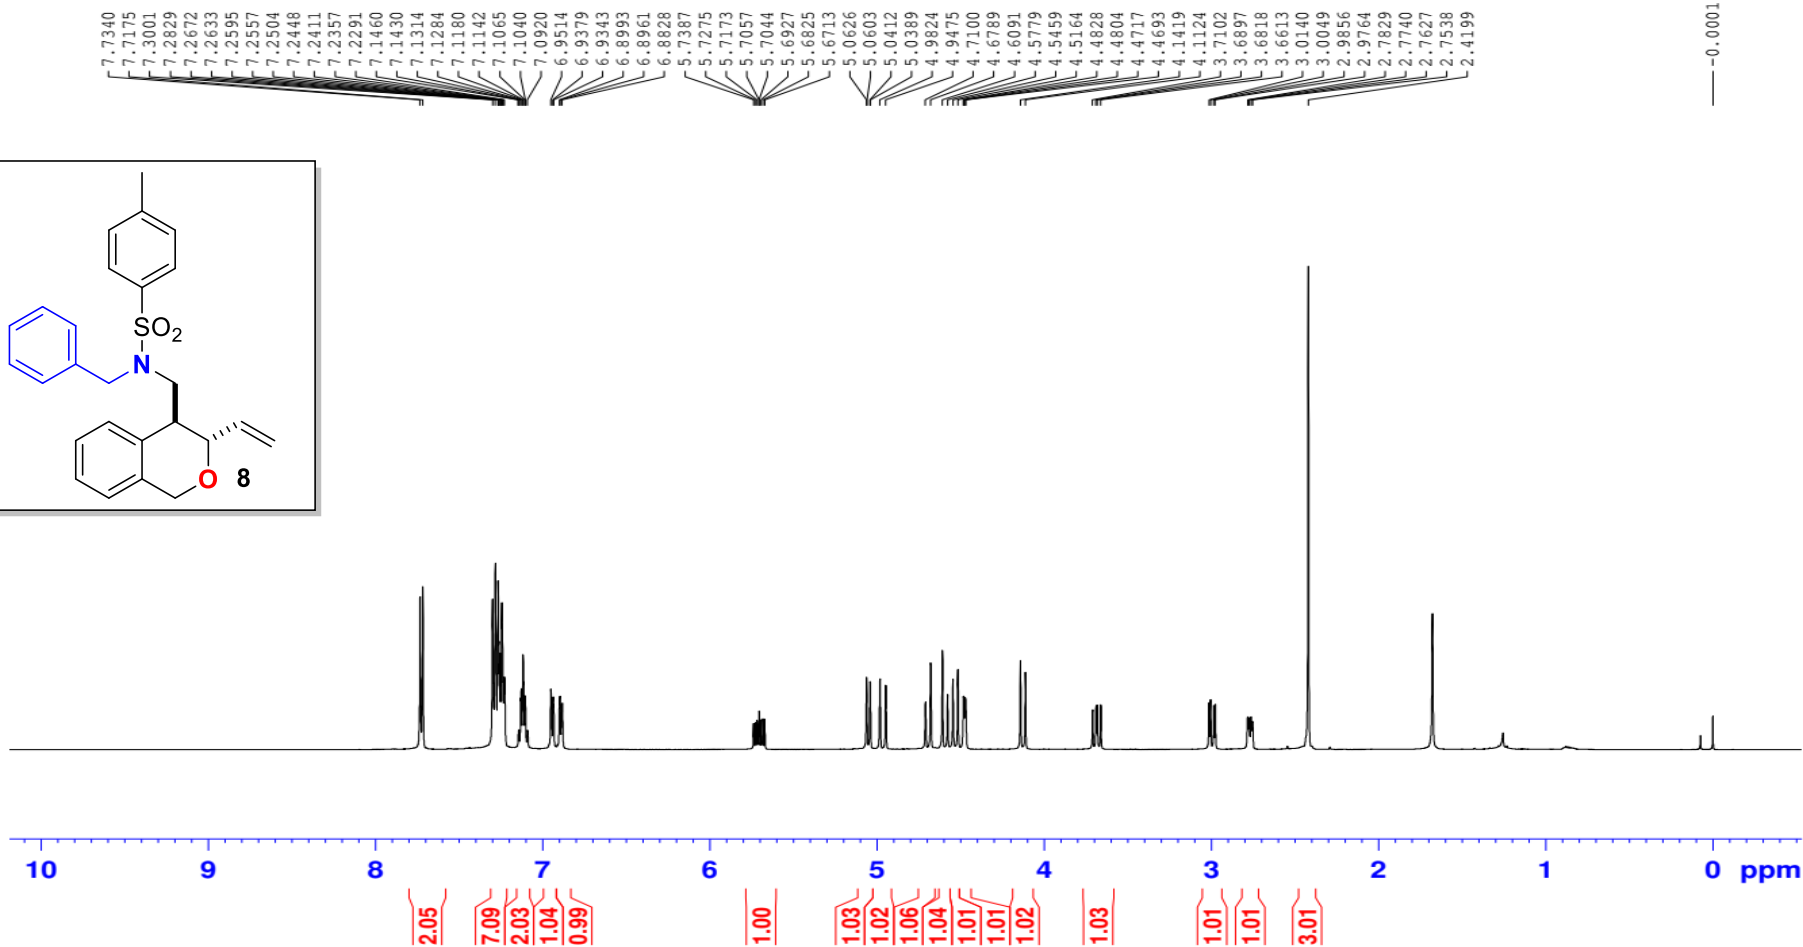

— 0.0001

hy-P-8 <sup>13</sup>C NMR (125MHz CDCl<sub>3</sub>)

hy-4aa-nts-c-

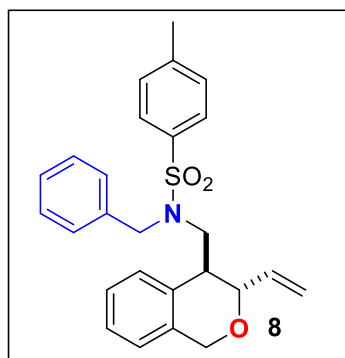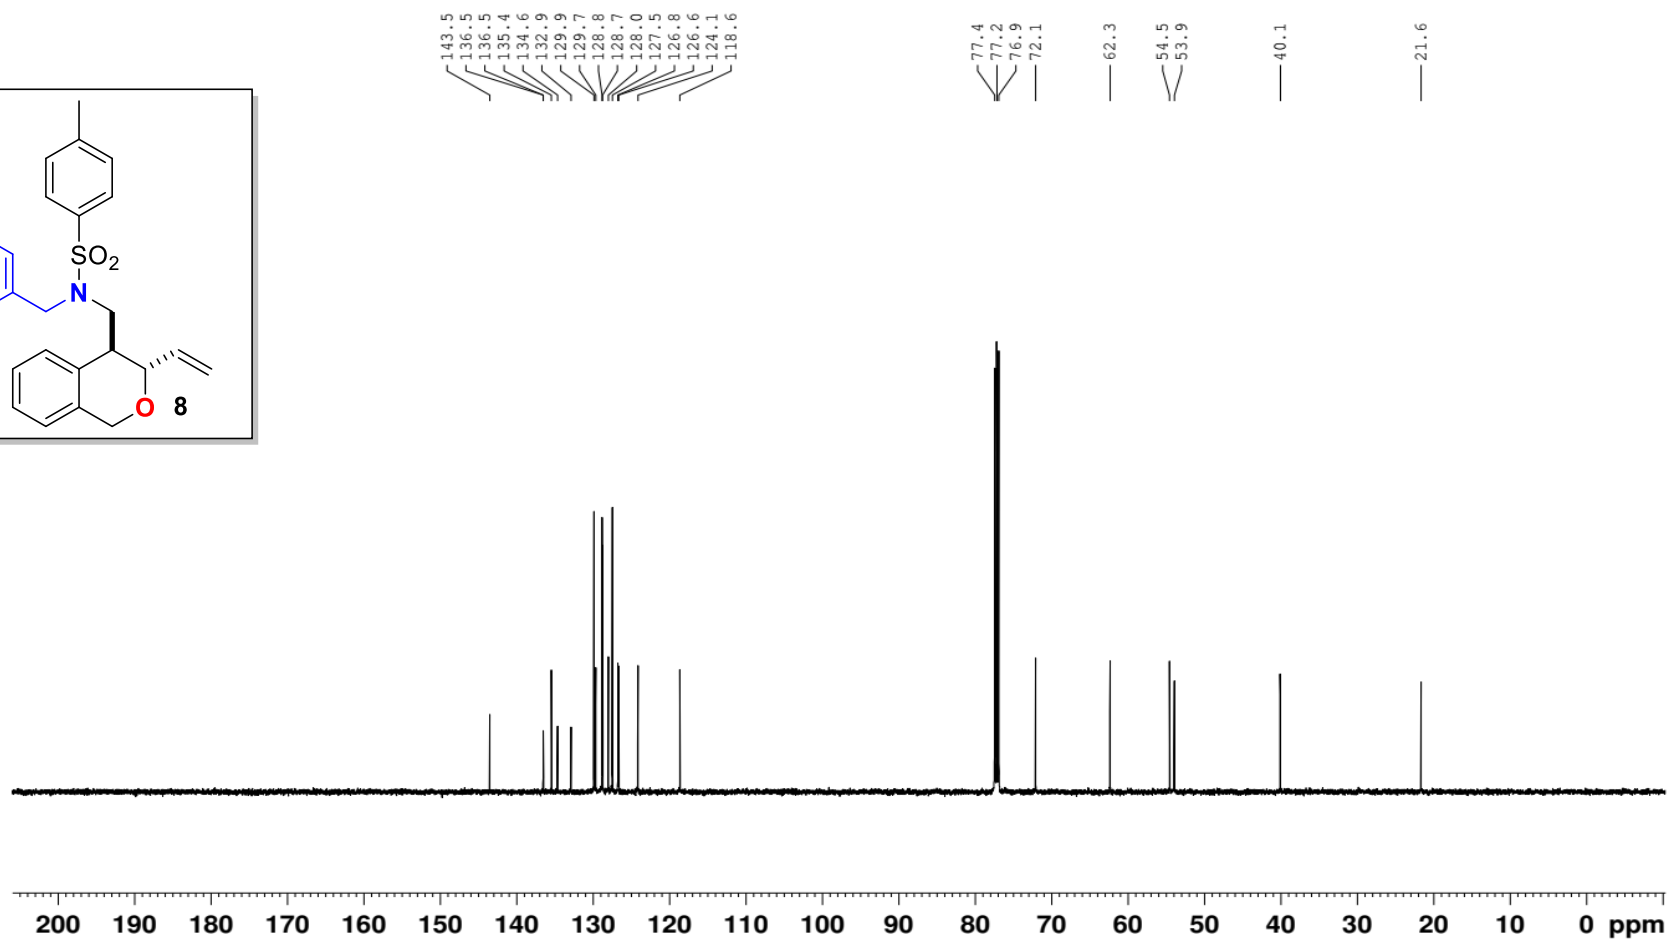

hy-P-9 <sup>1</sup>H NMR (500MHz CDCl<sub>3</sub>)

hy-4aa-nts-huanyang-h--

7.7258  
7.7229  
7.7093  
7.7065  
7.3335  
7.3212  
7.3174  
7.3056  
7.3022  
7.2884  
7.2850  
7.2804  
7.2728  
7.2692  
7.2482  
7.2393  
7.2344  
7.2241  
7.2207  
7.1626  
7.1594  
7.1530  
7.1494  
7.1449  
7.1407  
7.1382  
7.1311  
7.1278  
7.1237  
7.1166  
7.1135  
6.9849  
6.9713  
6.9507  
6.9470  
6.9360  
6.9332  
6.8933  
6.8796  
4.9003  
4.8683  
4.8364  
4.7019  
4.6707  
4.5165  
4.4870  
4.4809  
4.4514  
4.4190  
4.1341  
4.1195  
4.1047  
3.9088  
3.9065  
3.8994  
3.8970  
3.7036  
3.7004  
3.6976  
3.6891  
3.6864  
3.0143  
2.9864  
2.9818  
2.9786  
2.9729  
2.8232  
2.9035  
2.8952  
2.8829  
2.5774  
2.5689  
2.5673  
2.5645  
2.5589  
2.5558  
2.5463  
2.4162  
2.3194  
2.3143  
2.3092  
2.3041  
2.1551  
2.1497  
2.1454  
2.1400

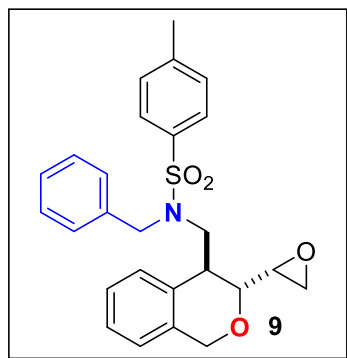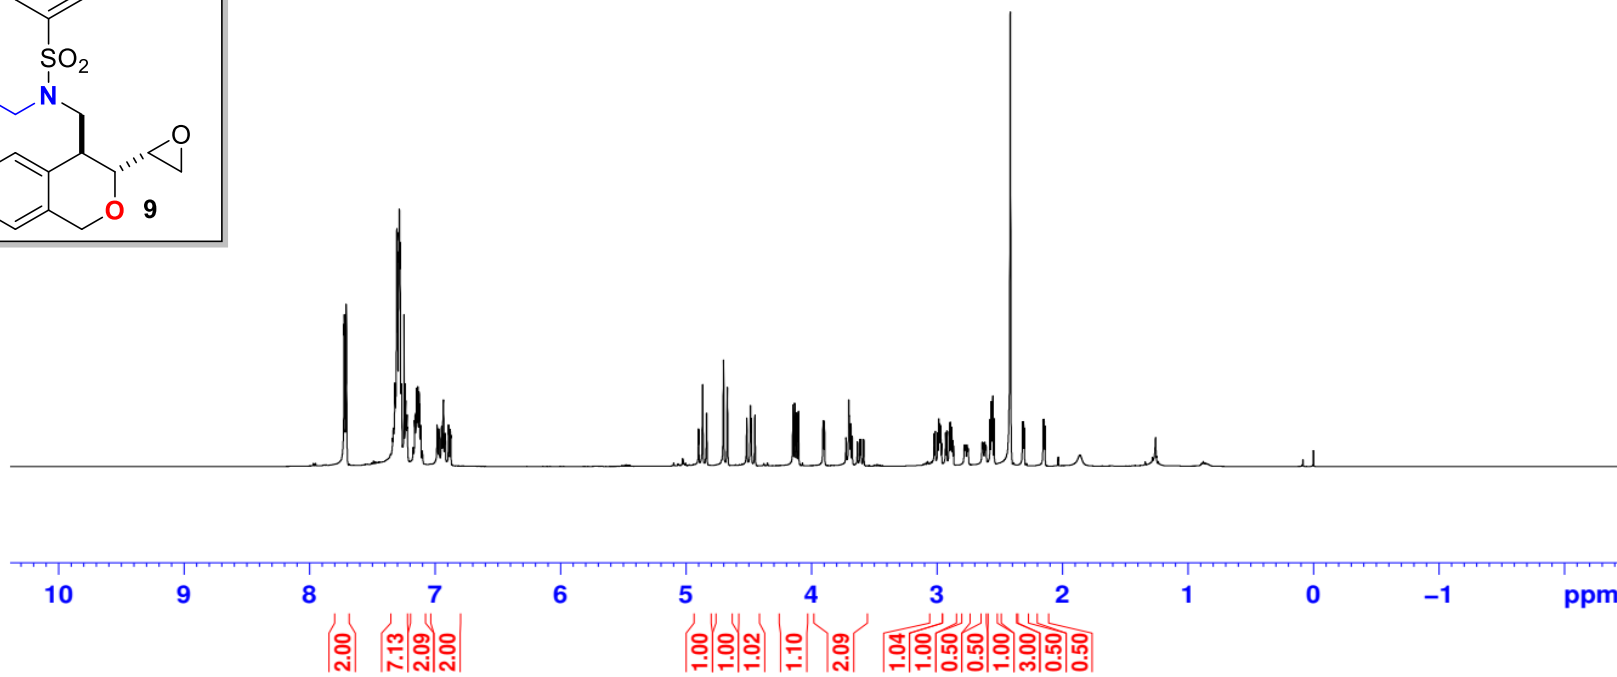



hy-P-9 <sup>13</sup>C NMR (125MHz CDCl<sub>3</sub>)

1y-4aa-nts-huanyang-c-

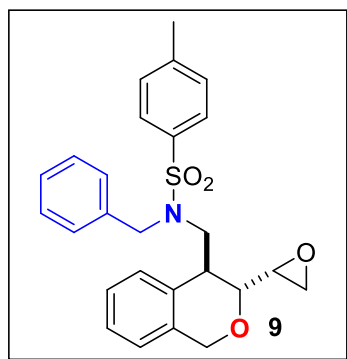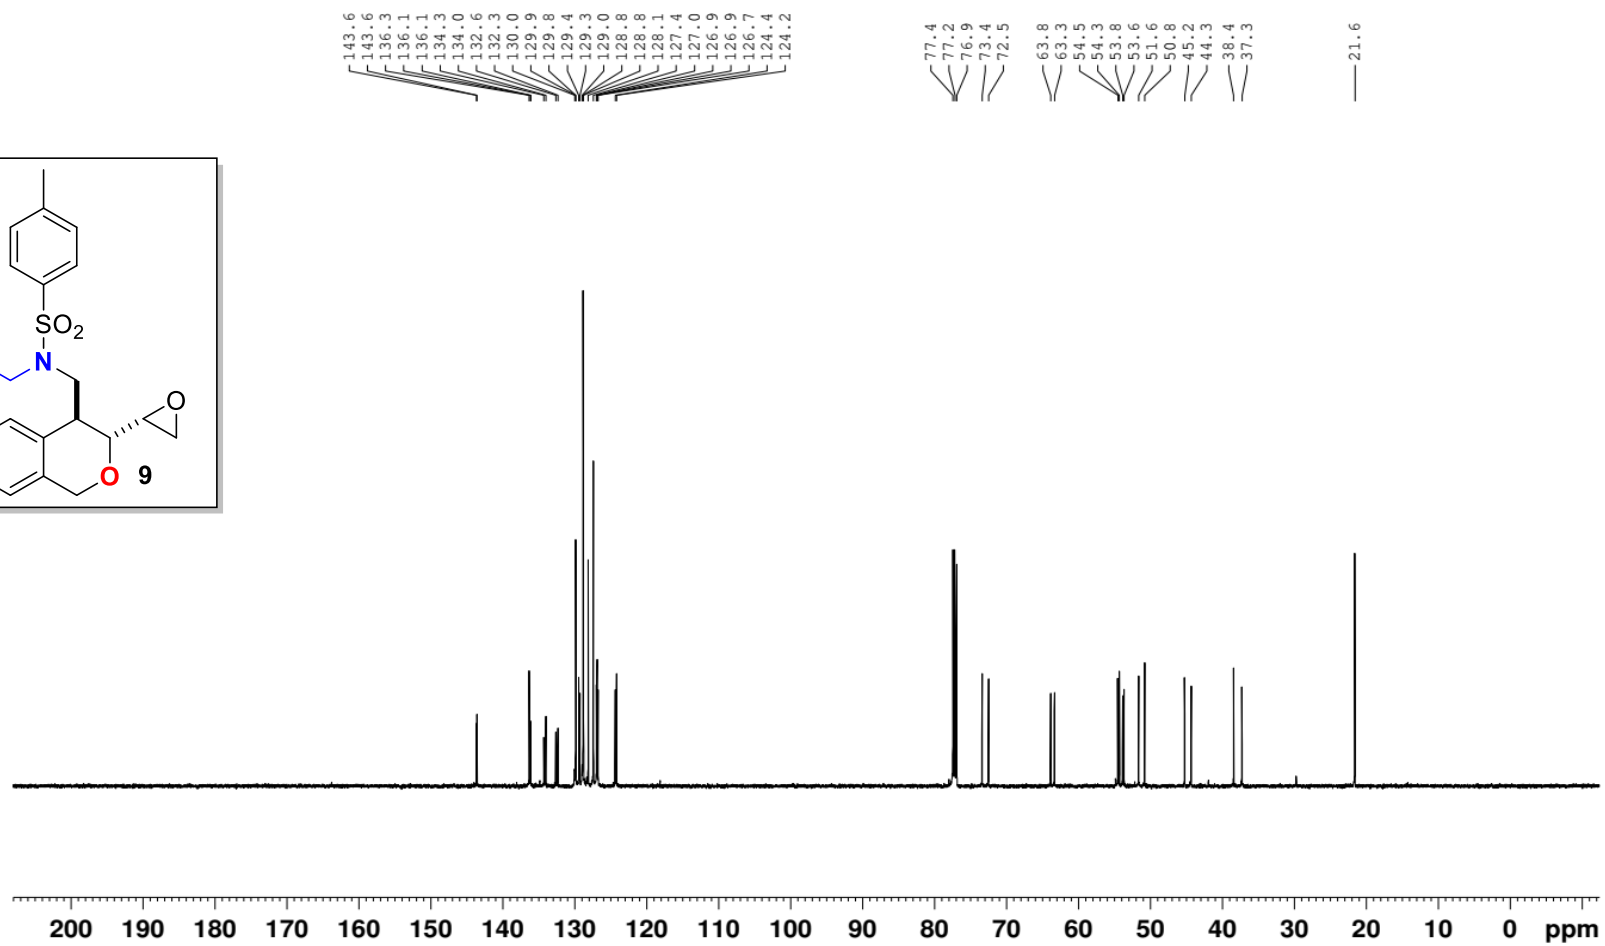

hy-P-10 <sup>1</sup>H NMR (400MHz CDCl<sub>3</sub>)

hy-trans-nts-o3-1

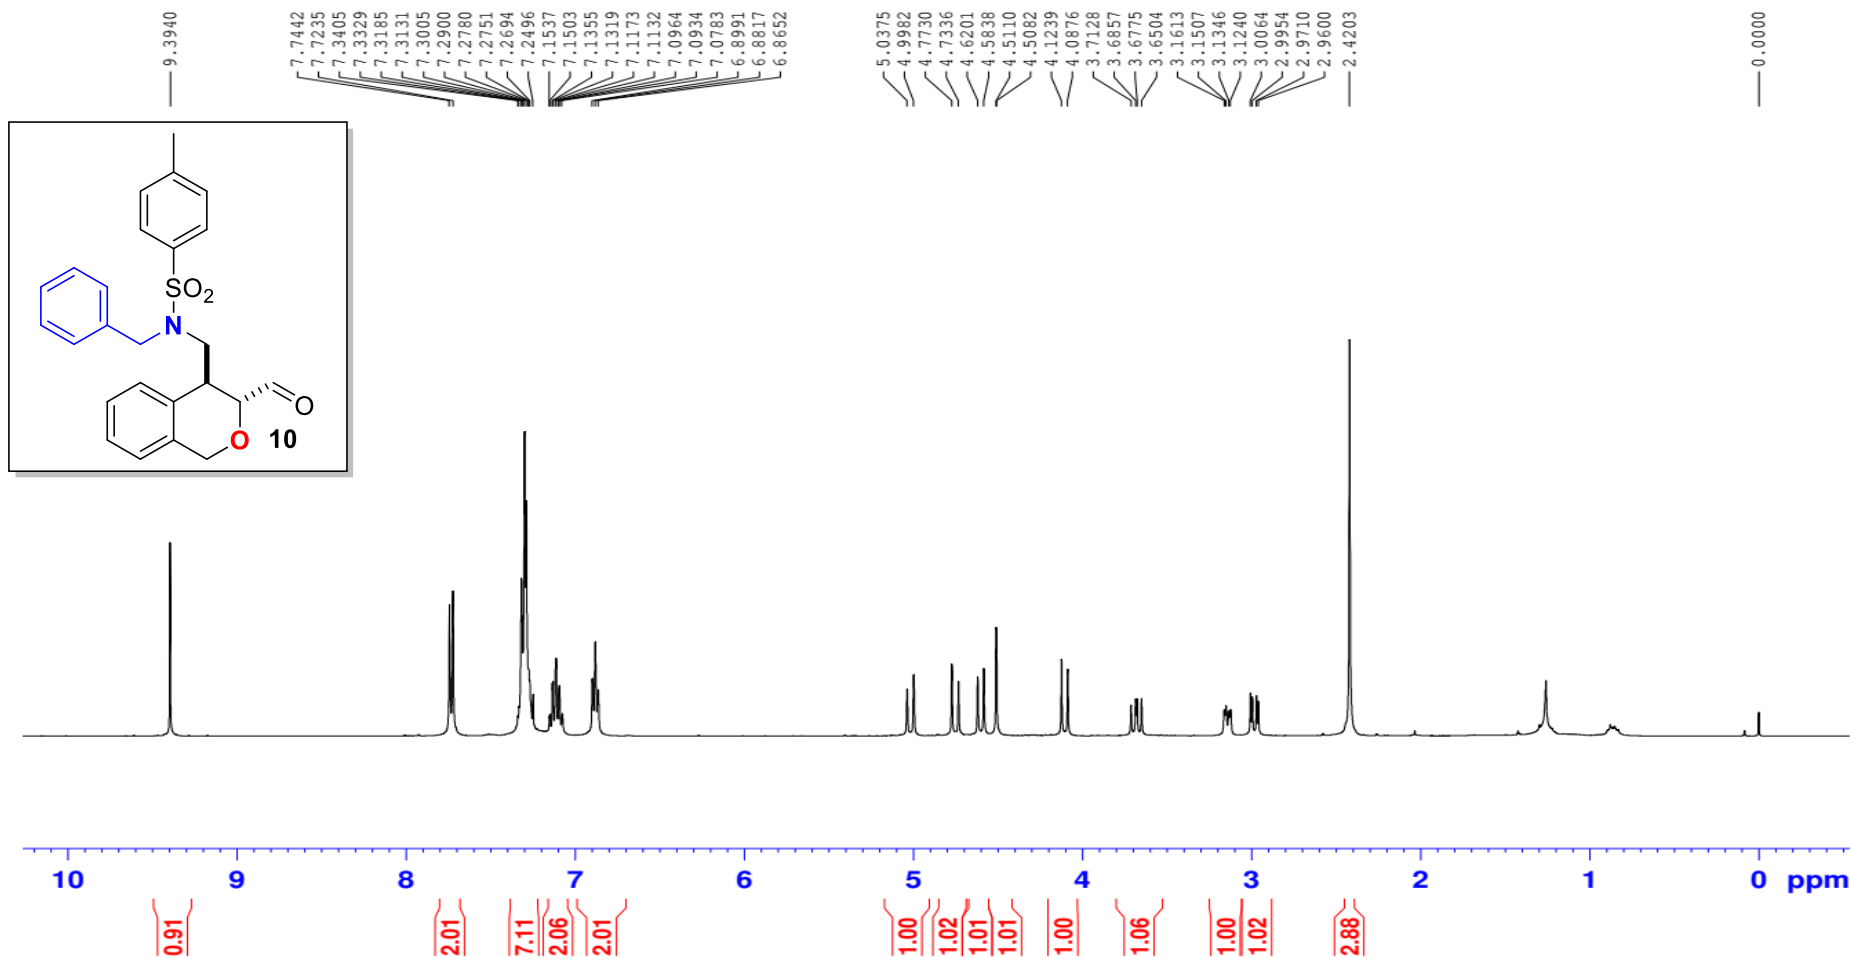

hy-P-10 <sup>13</sup>C NMR (100MHz CDCl<sub>3</sub>)

hy-trans-nts-o3-c

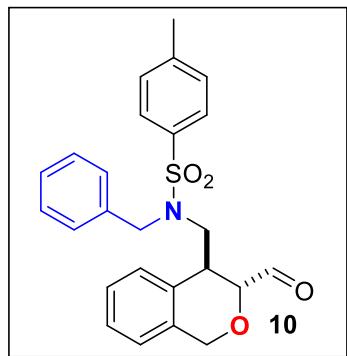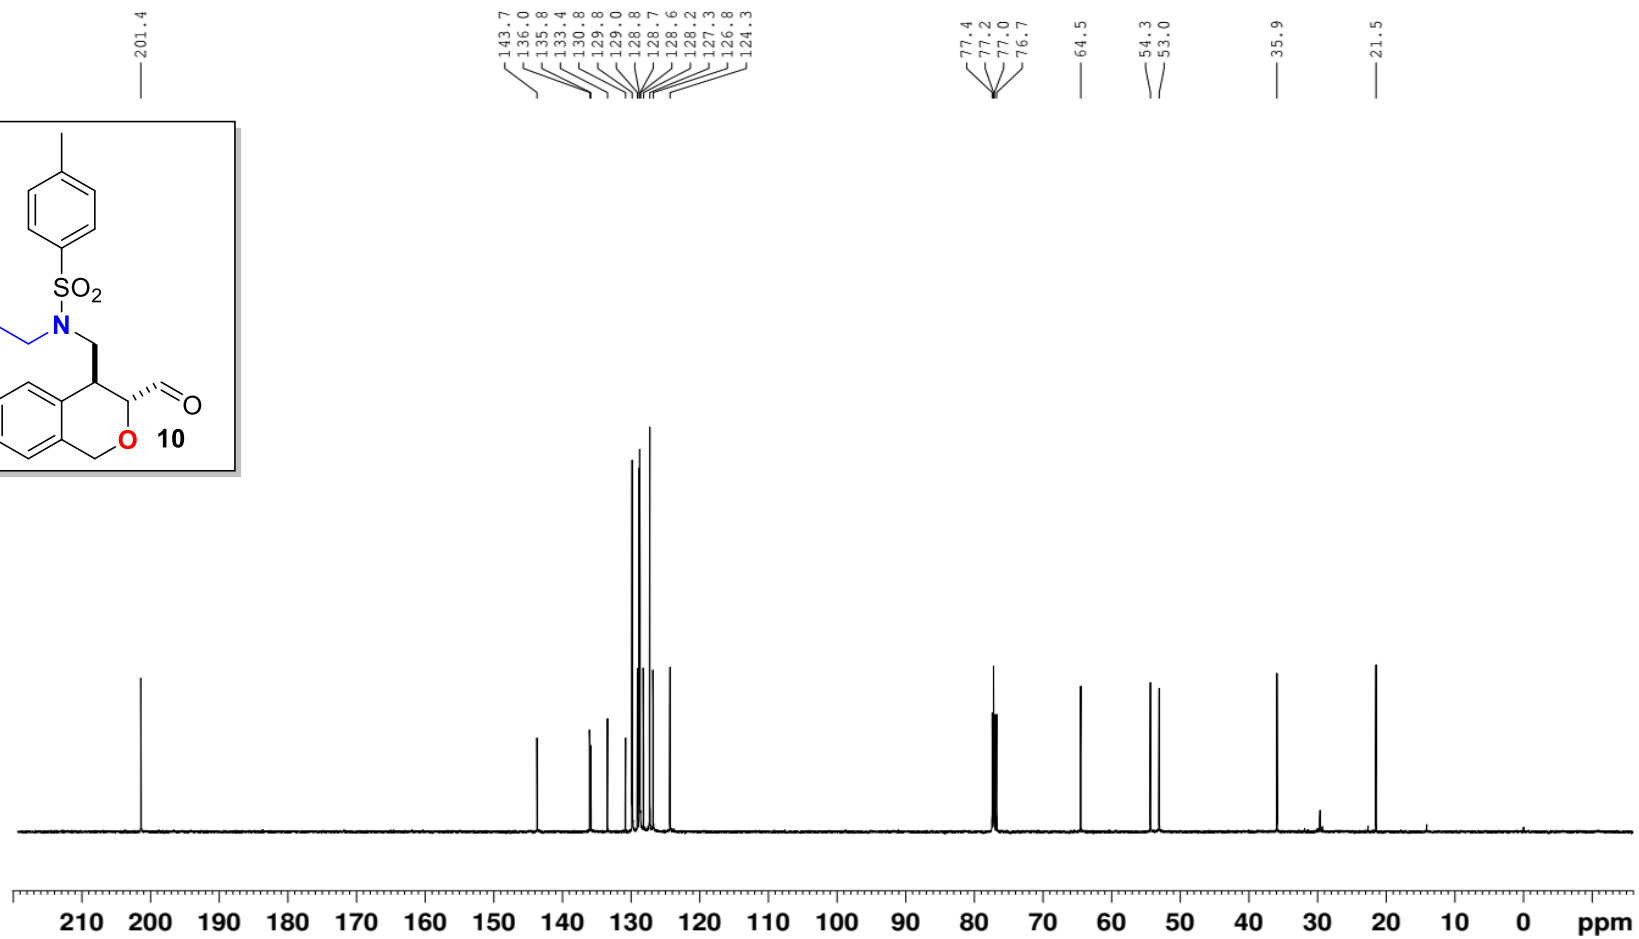

hy-3aa-tuobian-h-

hy-P-11 <sup>1</sup>H NMR (400MHz CDCl<sub>3</sub>)

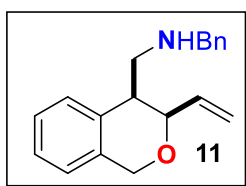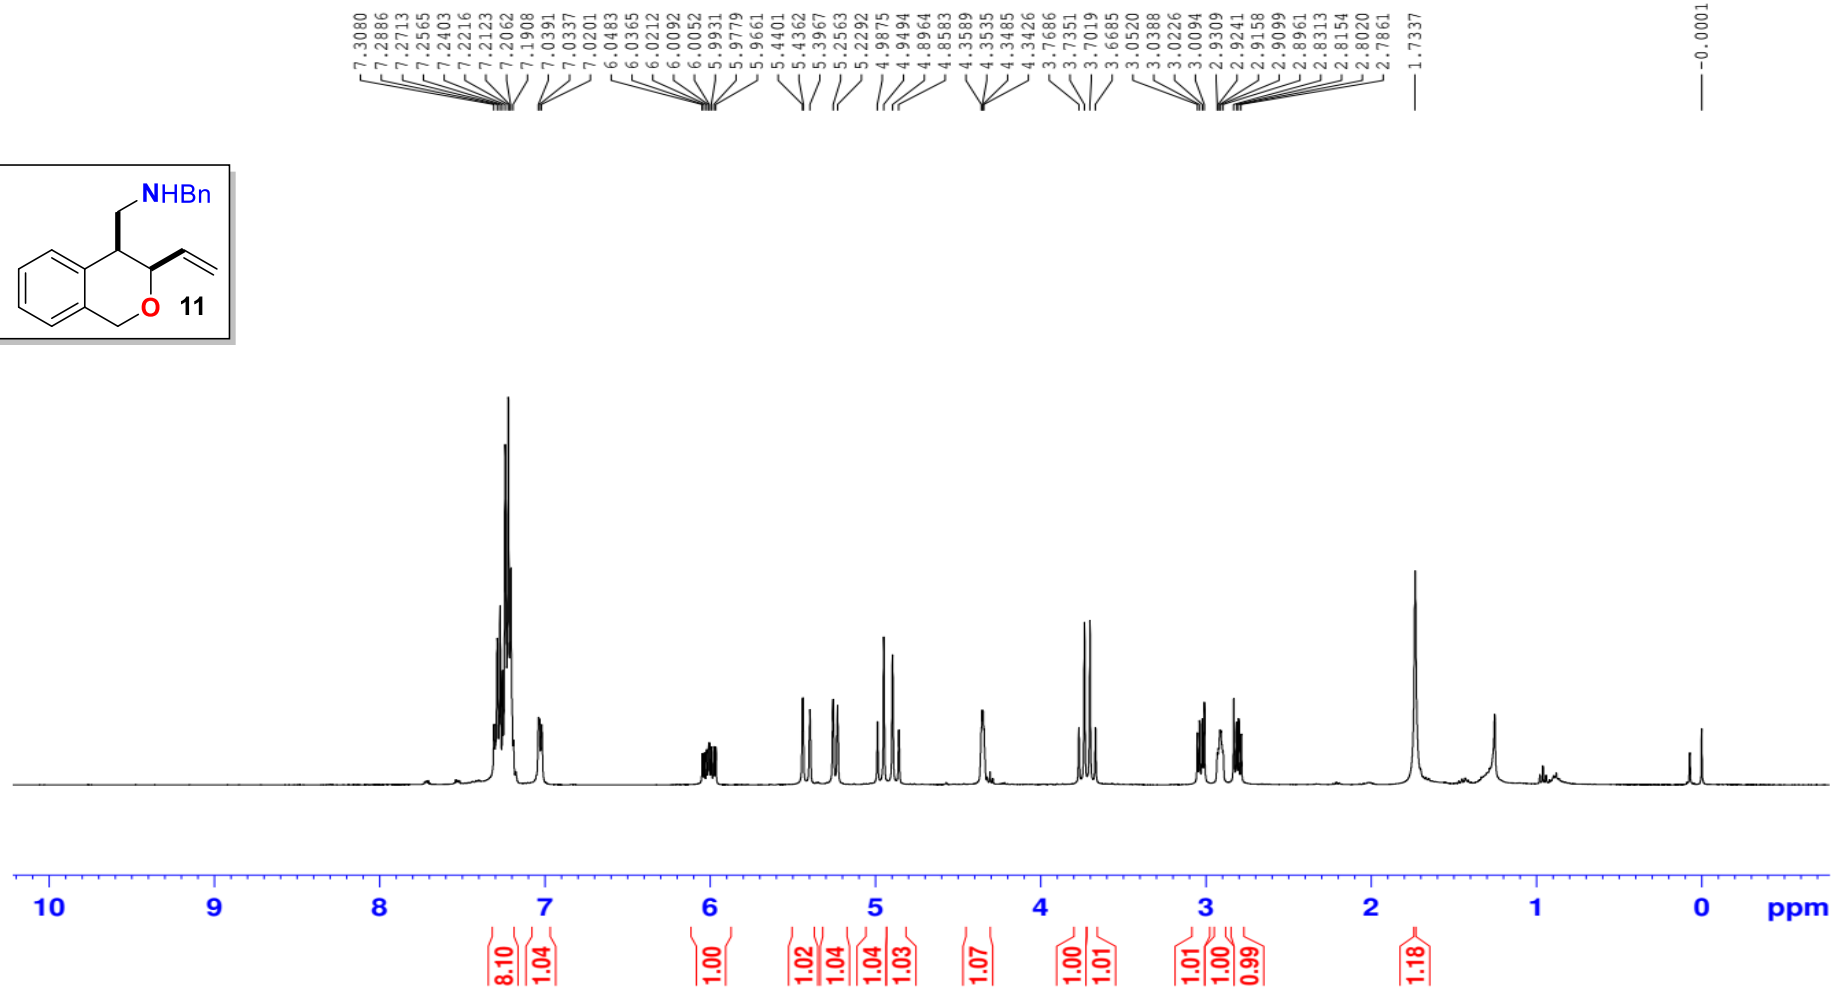

hy-P-11 <sup>13</sup>C NMR (125MHz CDCl<sub>3</sub>)

hy-3aa-tuobian-c--

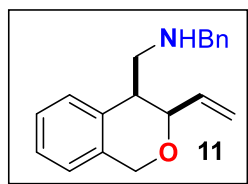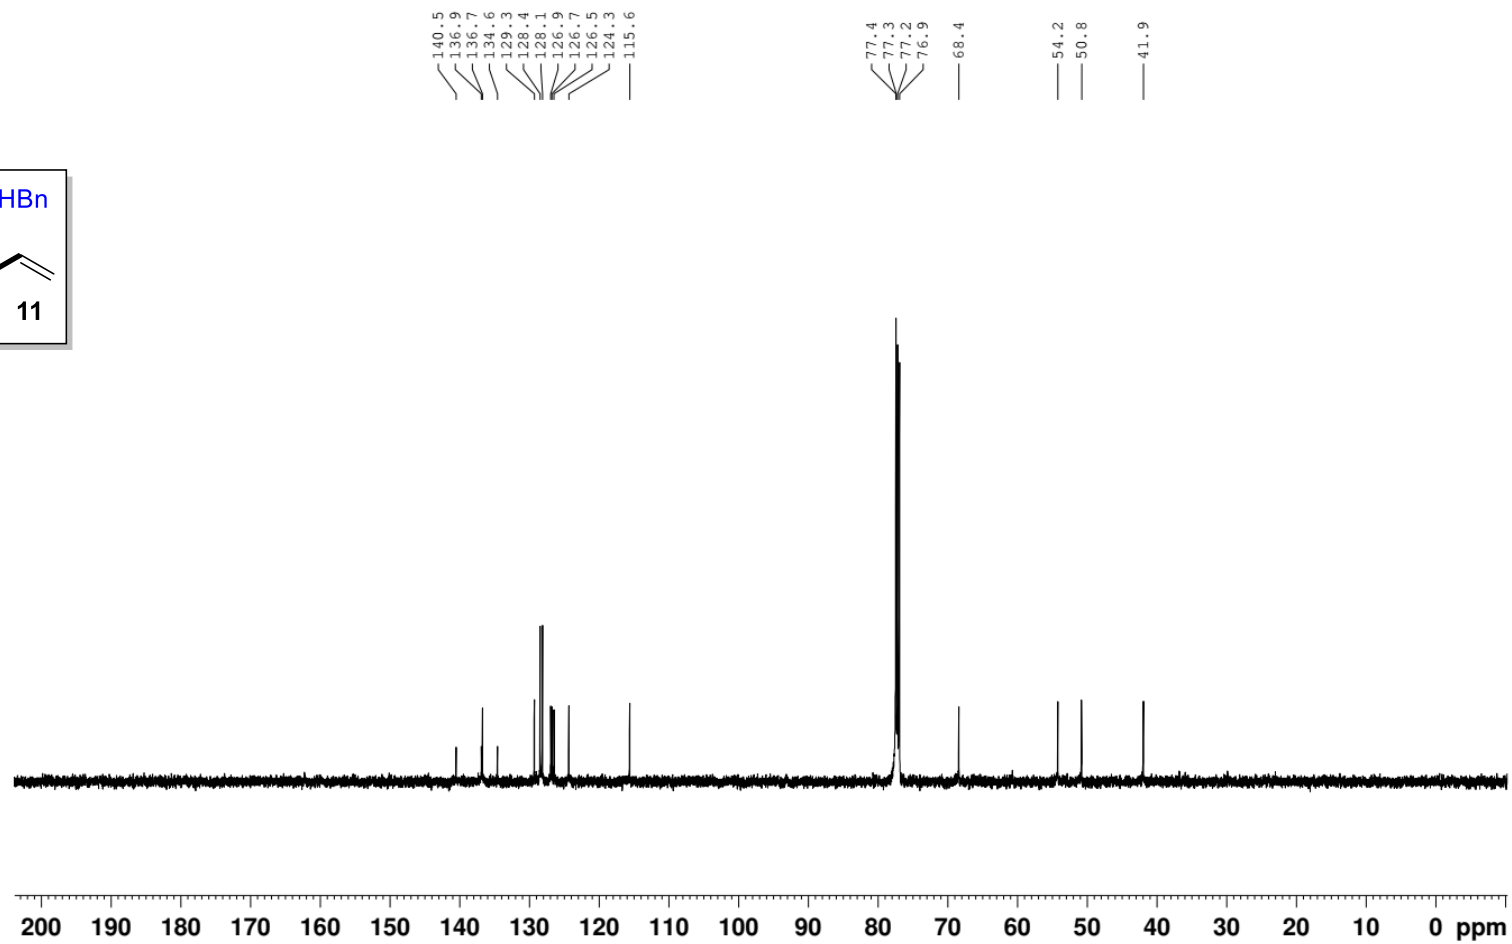

hy-P-12 <sup>1</sup>H NMR (500MHz CDCl<sub>3</sub>)

hy-3aa-2,4-no2-1

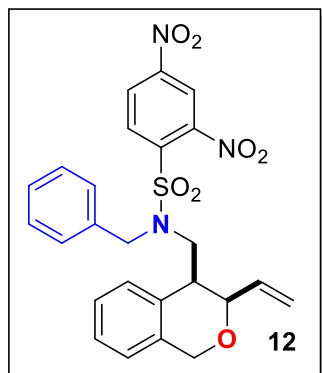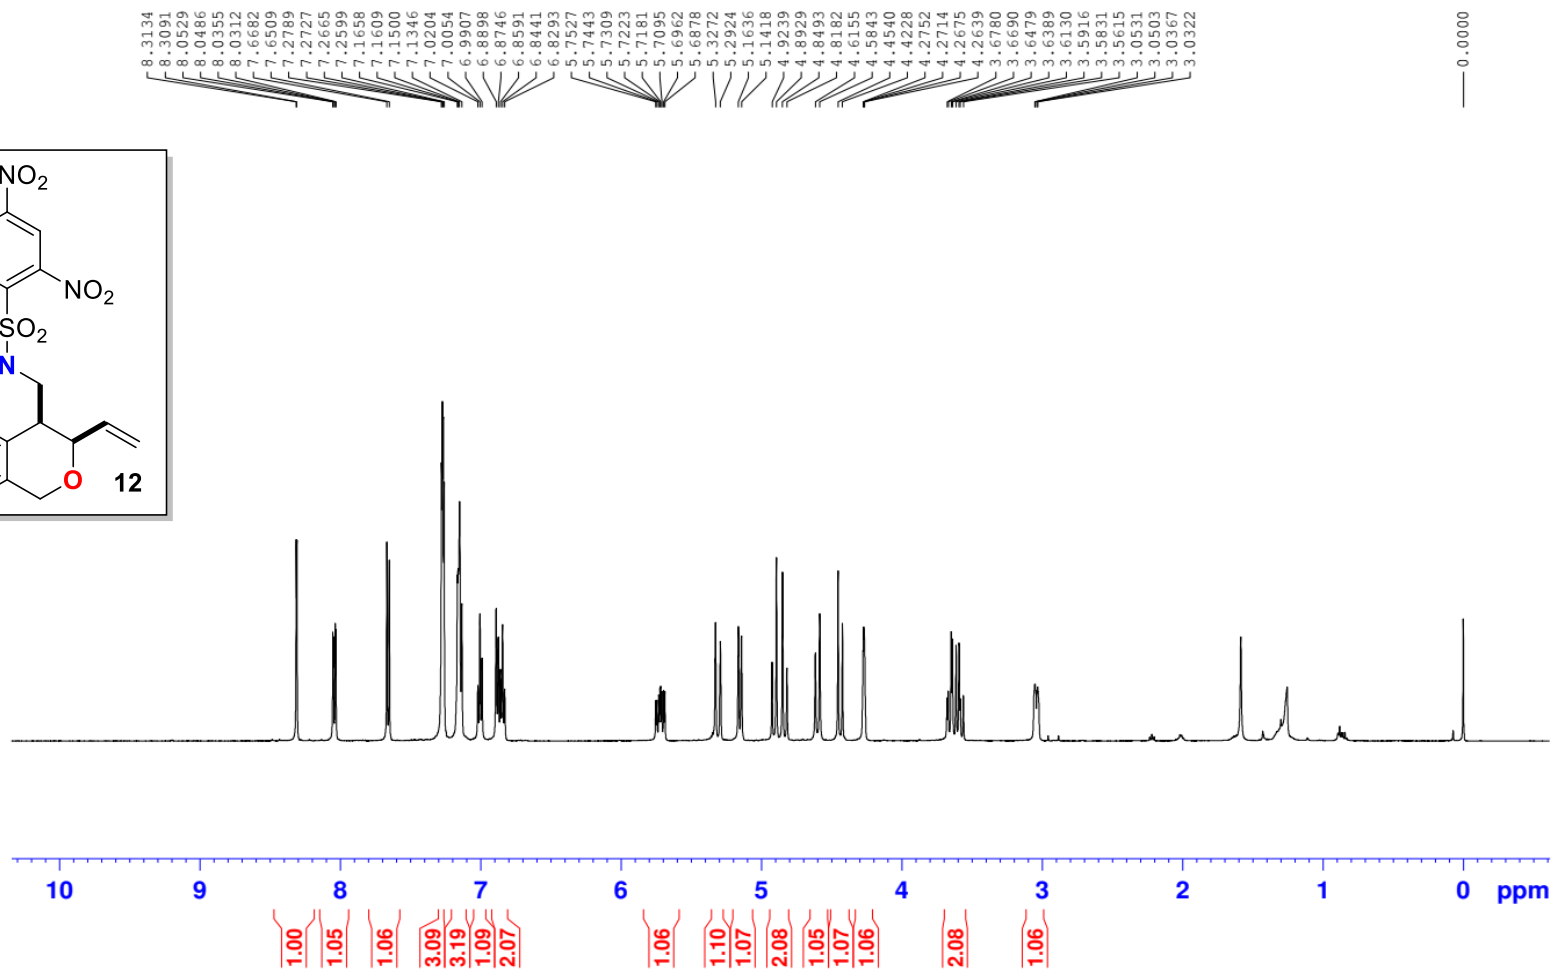

hy-P-12 <sup>13</sup>C NMR (125MHz CDCl<sub>3</sub>)

hy-3aa-2,4-no2-1-c

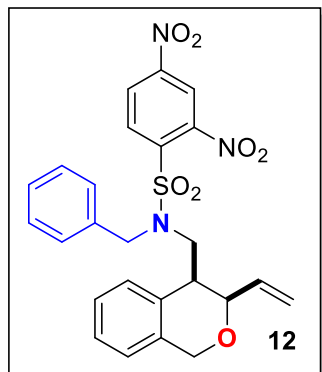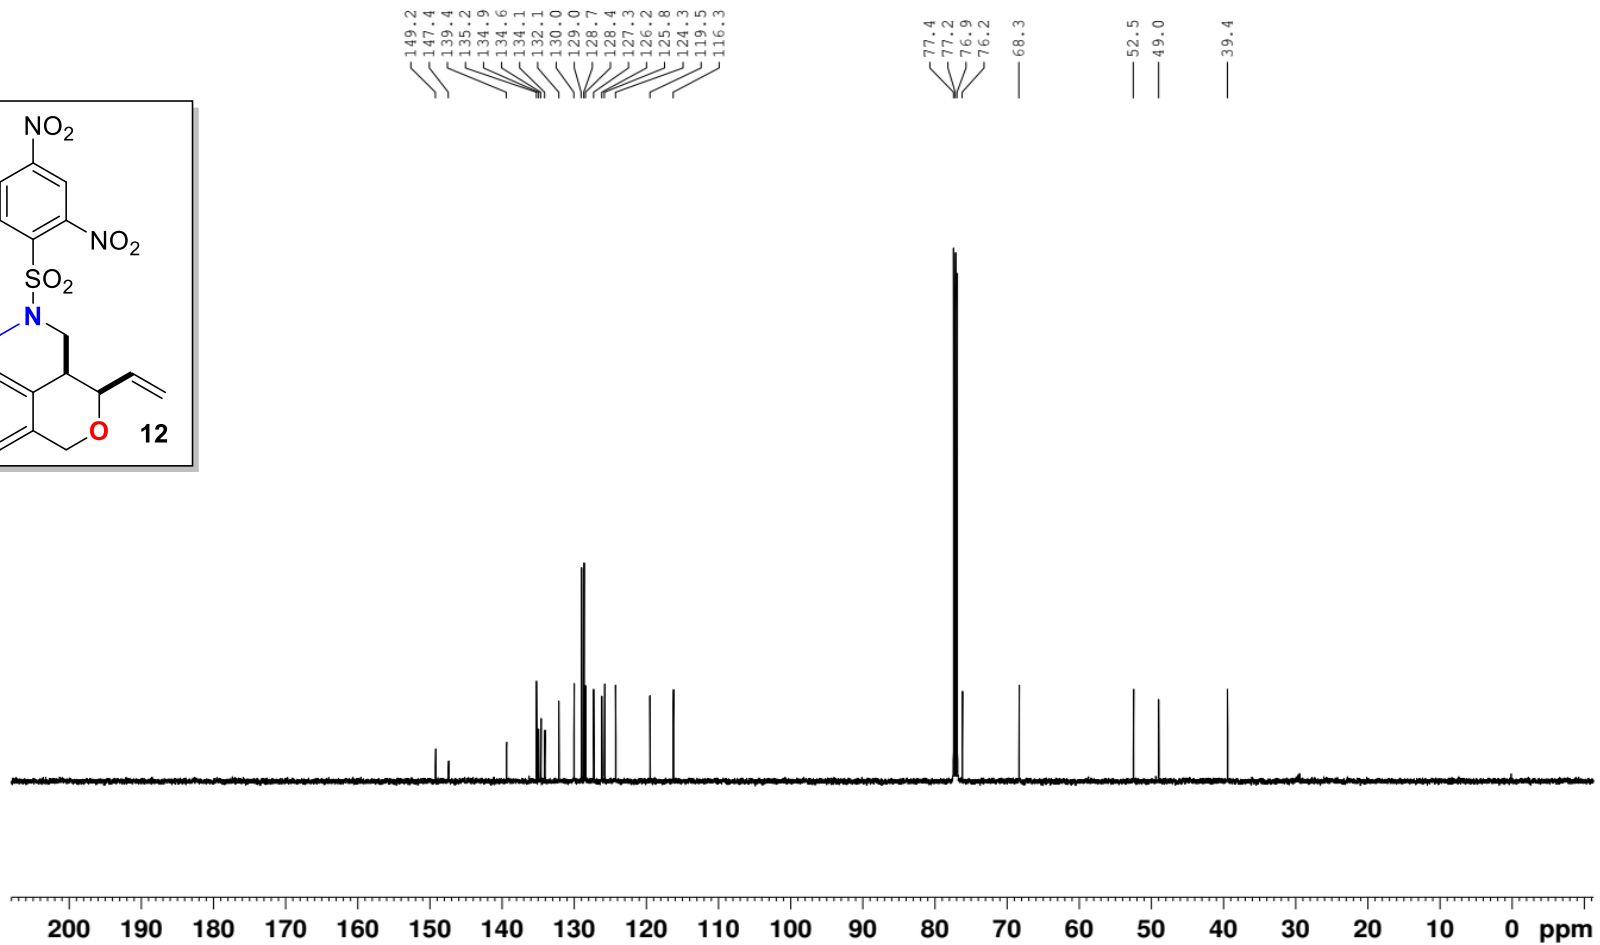

hy-P-13 <sup>1</sup>H NMR (400MHz CDCl<sub>3</sub>)

hy-cis-huanhua-xia

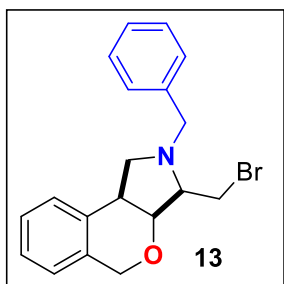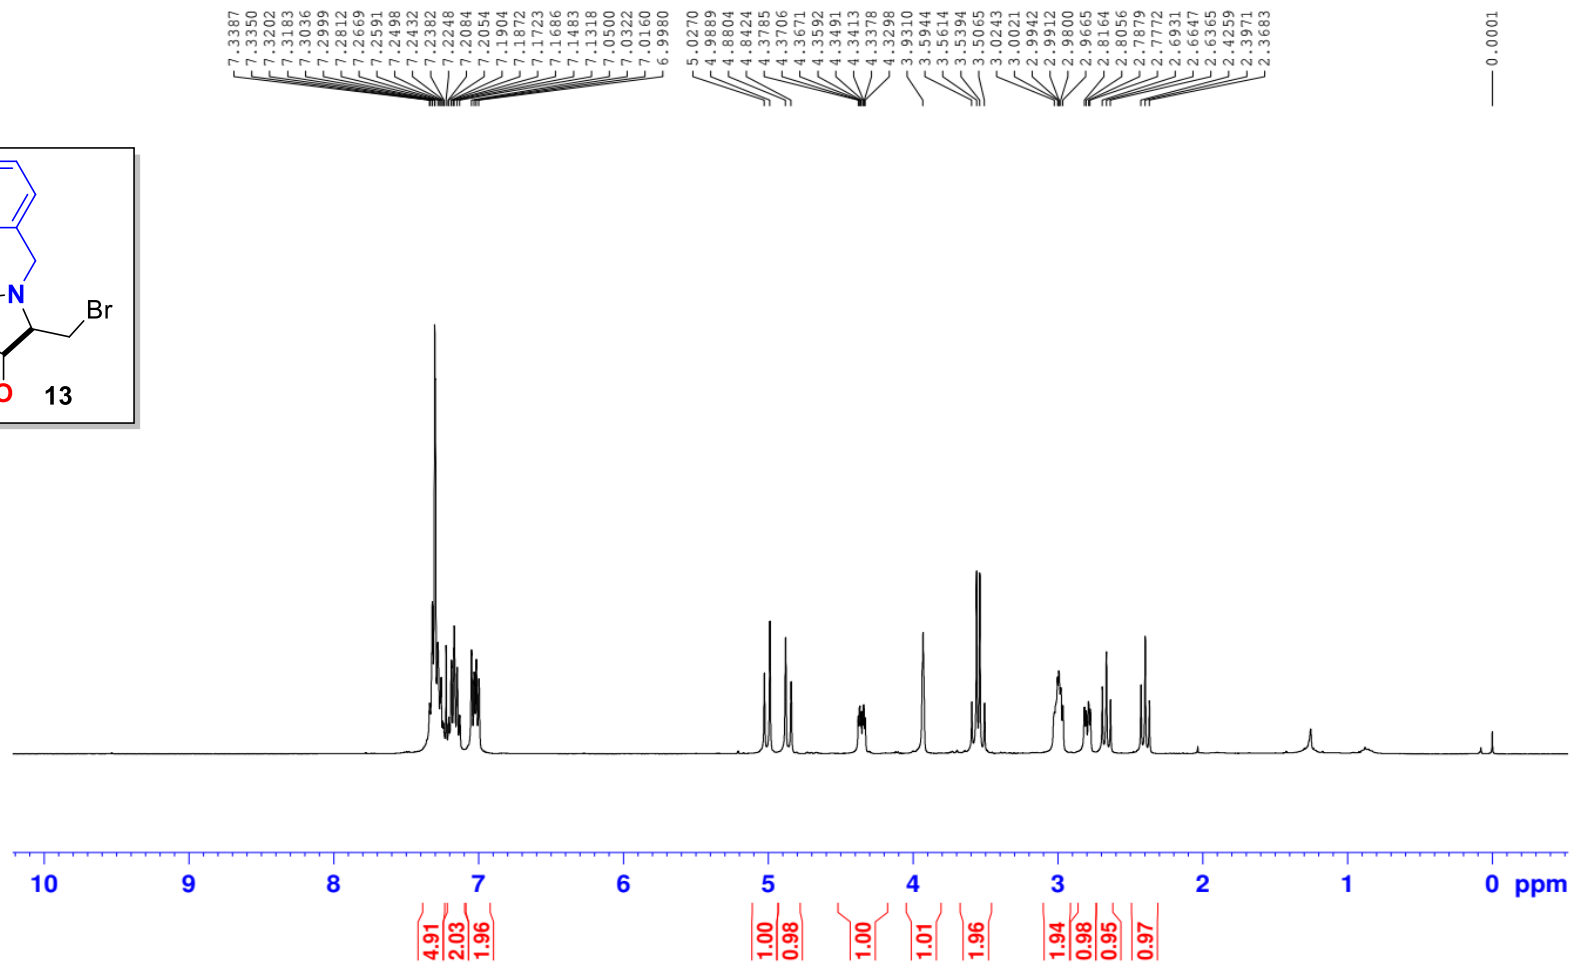



hy-P-13 <sup>13</sup>C NMR (100MHz CDCl<sub>3</sub>)

hy-cis-huanhua-xia-c-

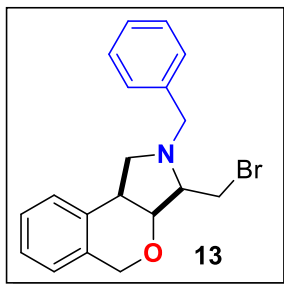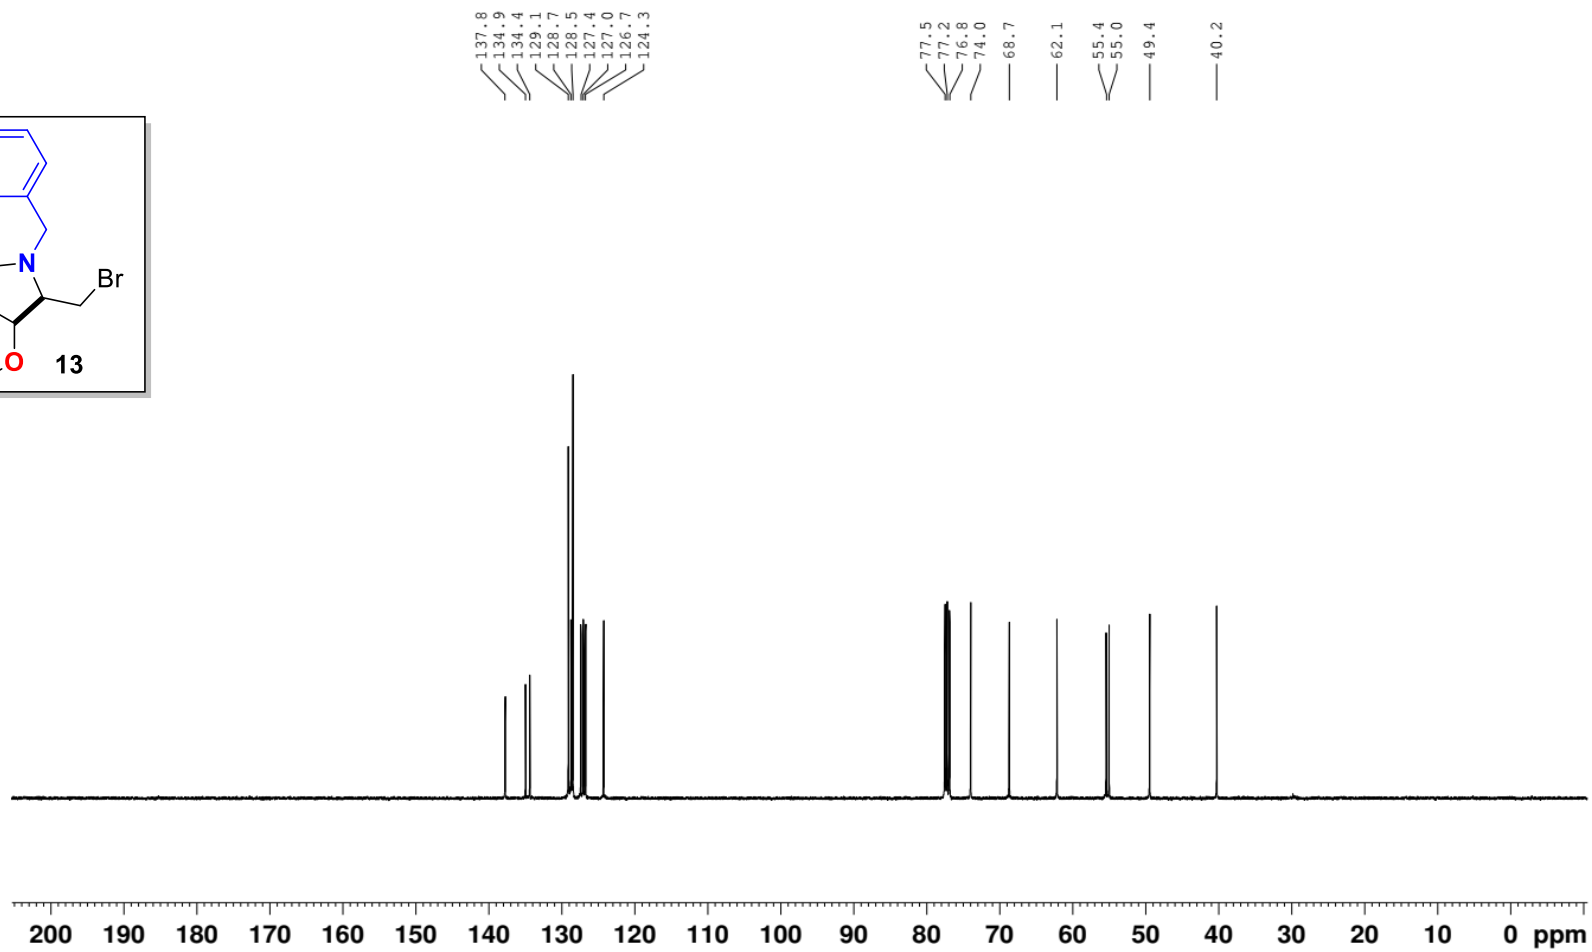

hy-S-1t <sup>1</sup>H NMR (500MHz CDCl<sub>3</sub>)

hy-yuan-diene-och3-h

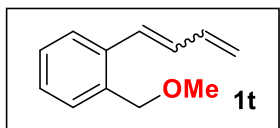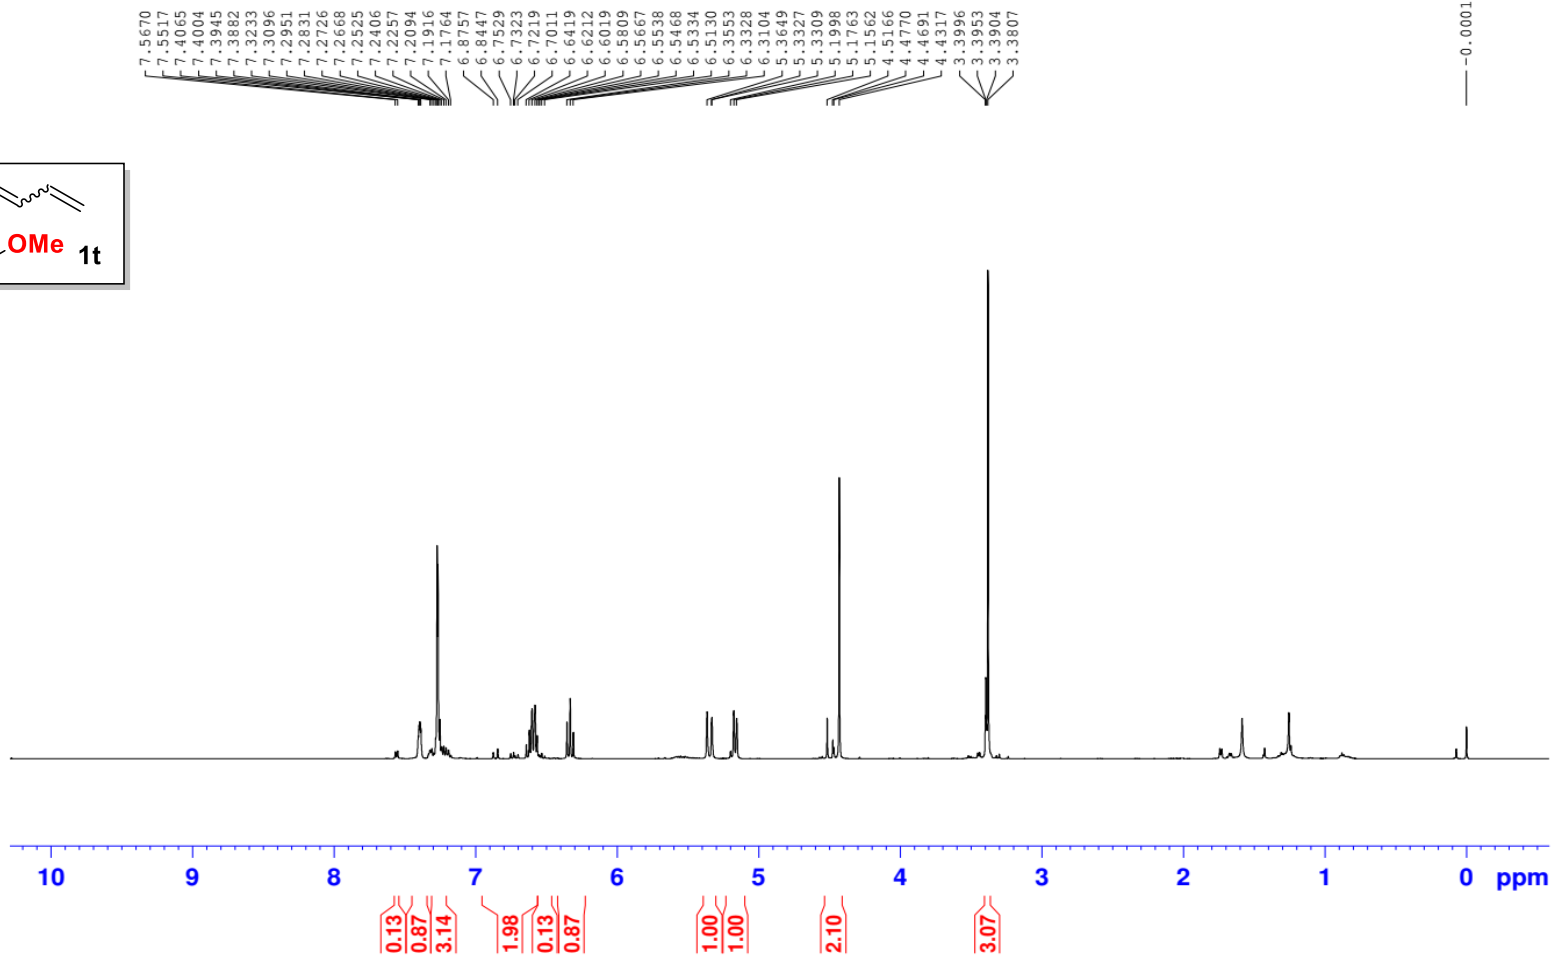

hy-S-1t <sup>13</sup>C NMR (125MHz CDCl<sub>3</sub>)

hy-yuan-diene-och3-c

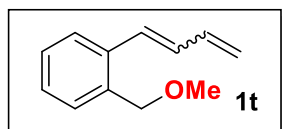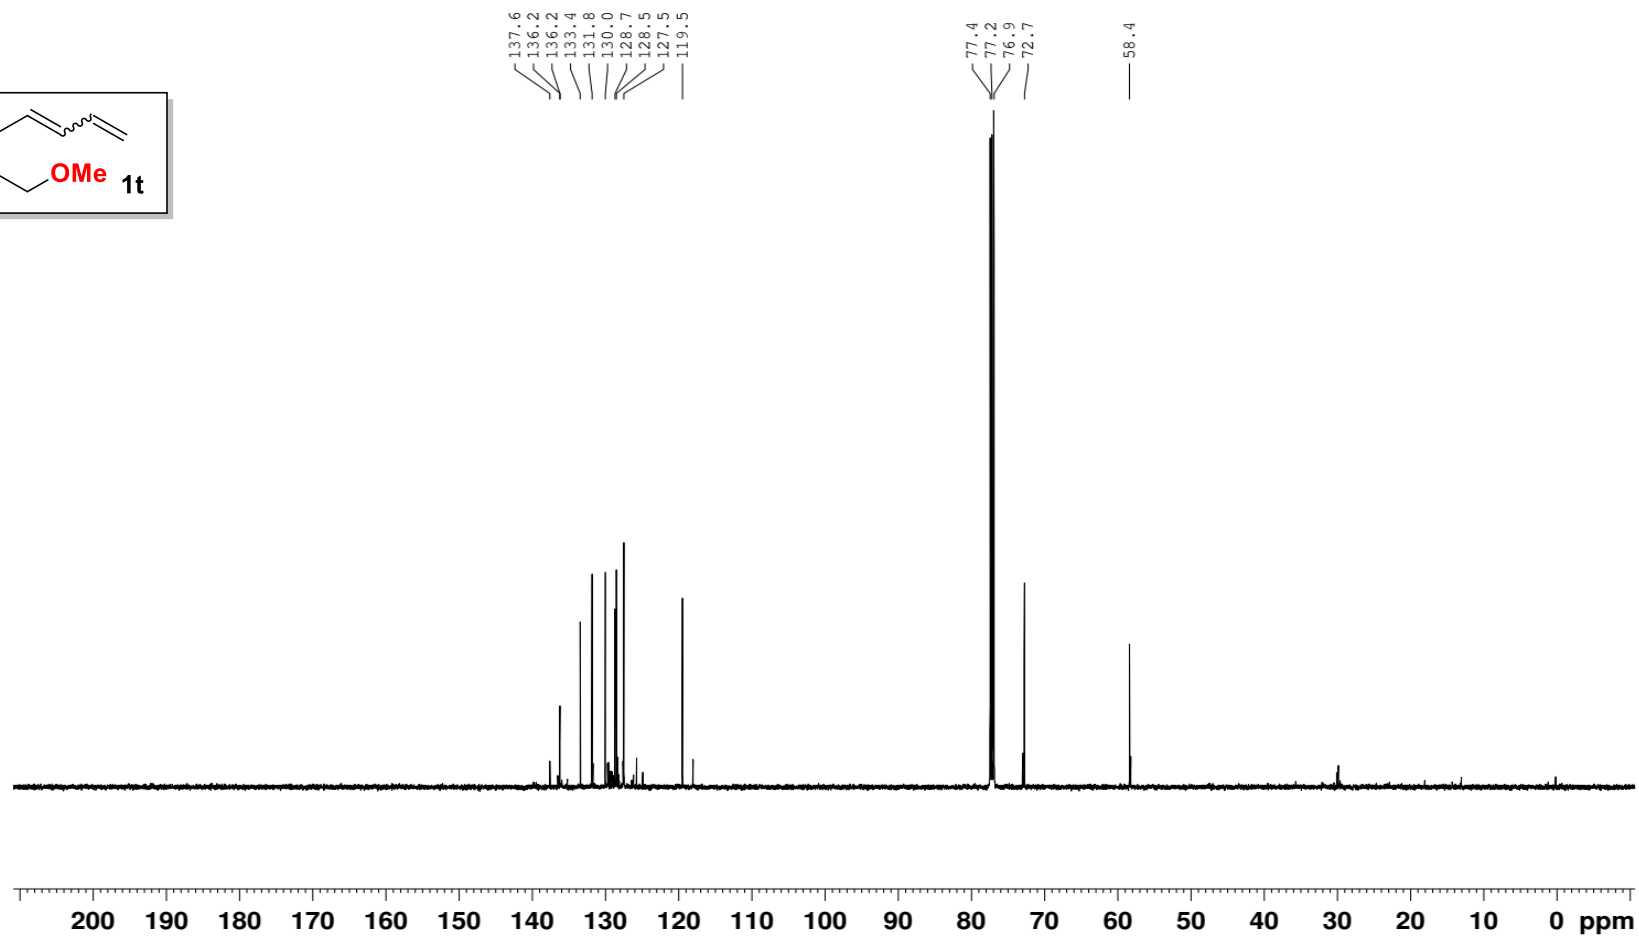

hy-P-17 <sup>1</sup>H NMR (400MHz CDCl<sub>3</sub>)

hy-x210904-1-up-3

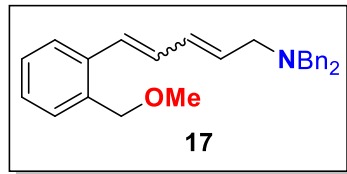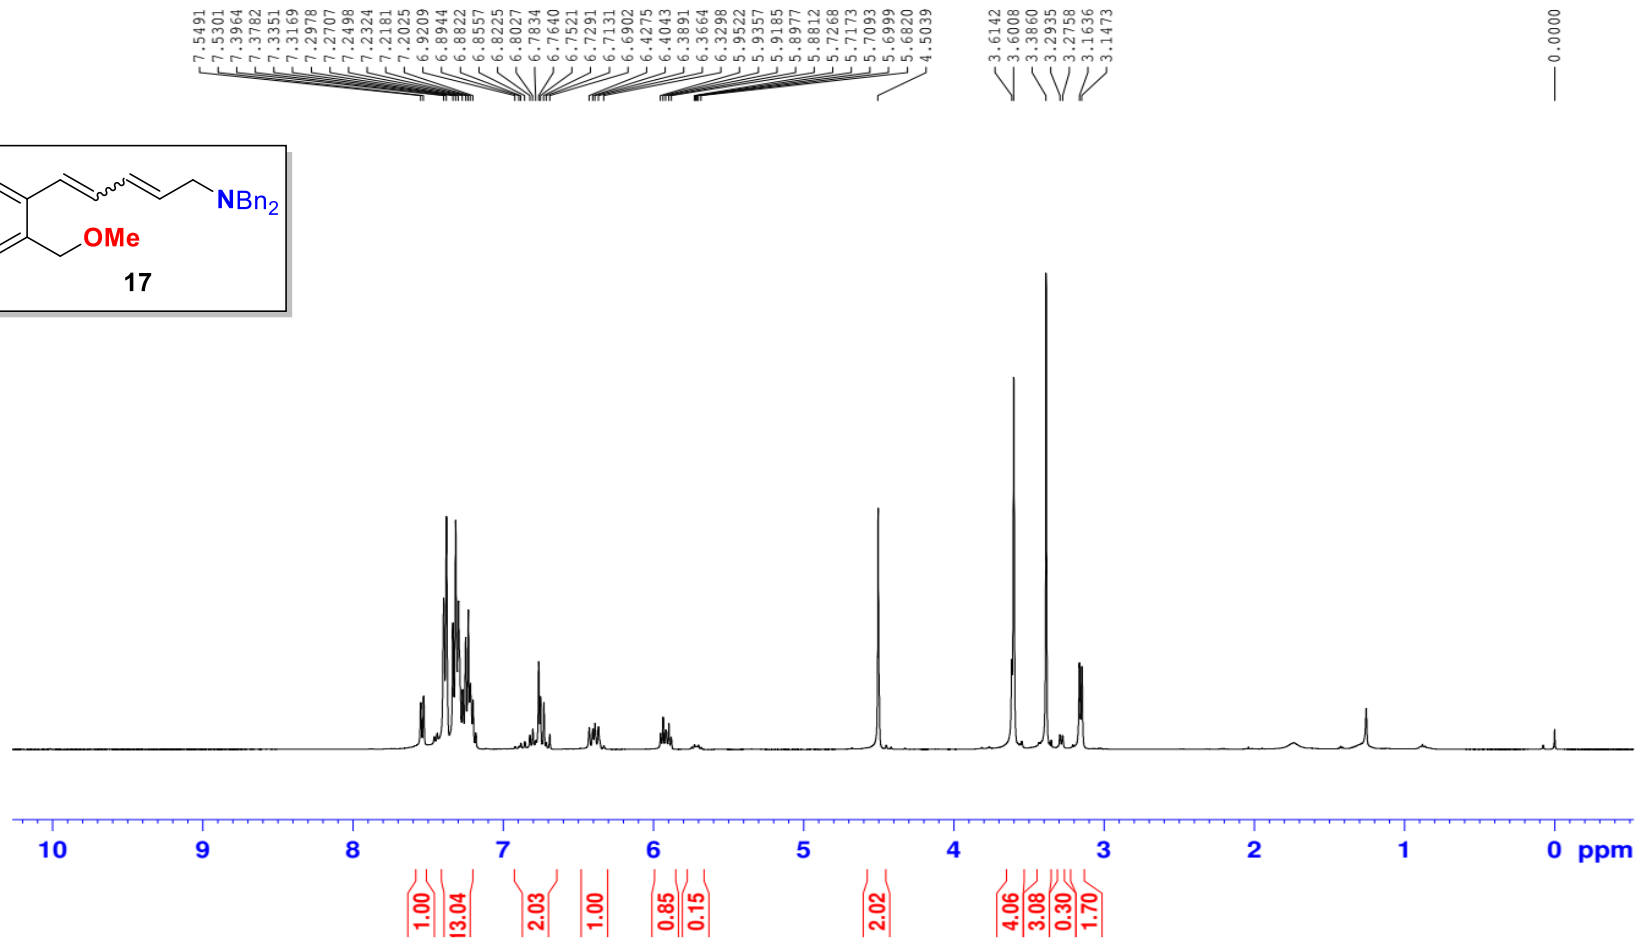

hy-P-17 <sup>13</sup>C NMR (125MHz CDCl<sub>3</sub>)

hy-x210904-1-up-3-c

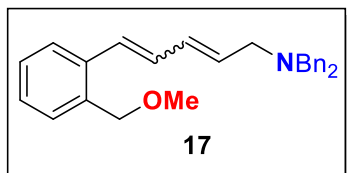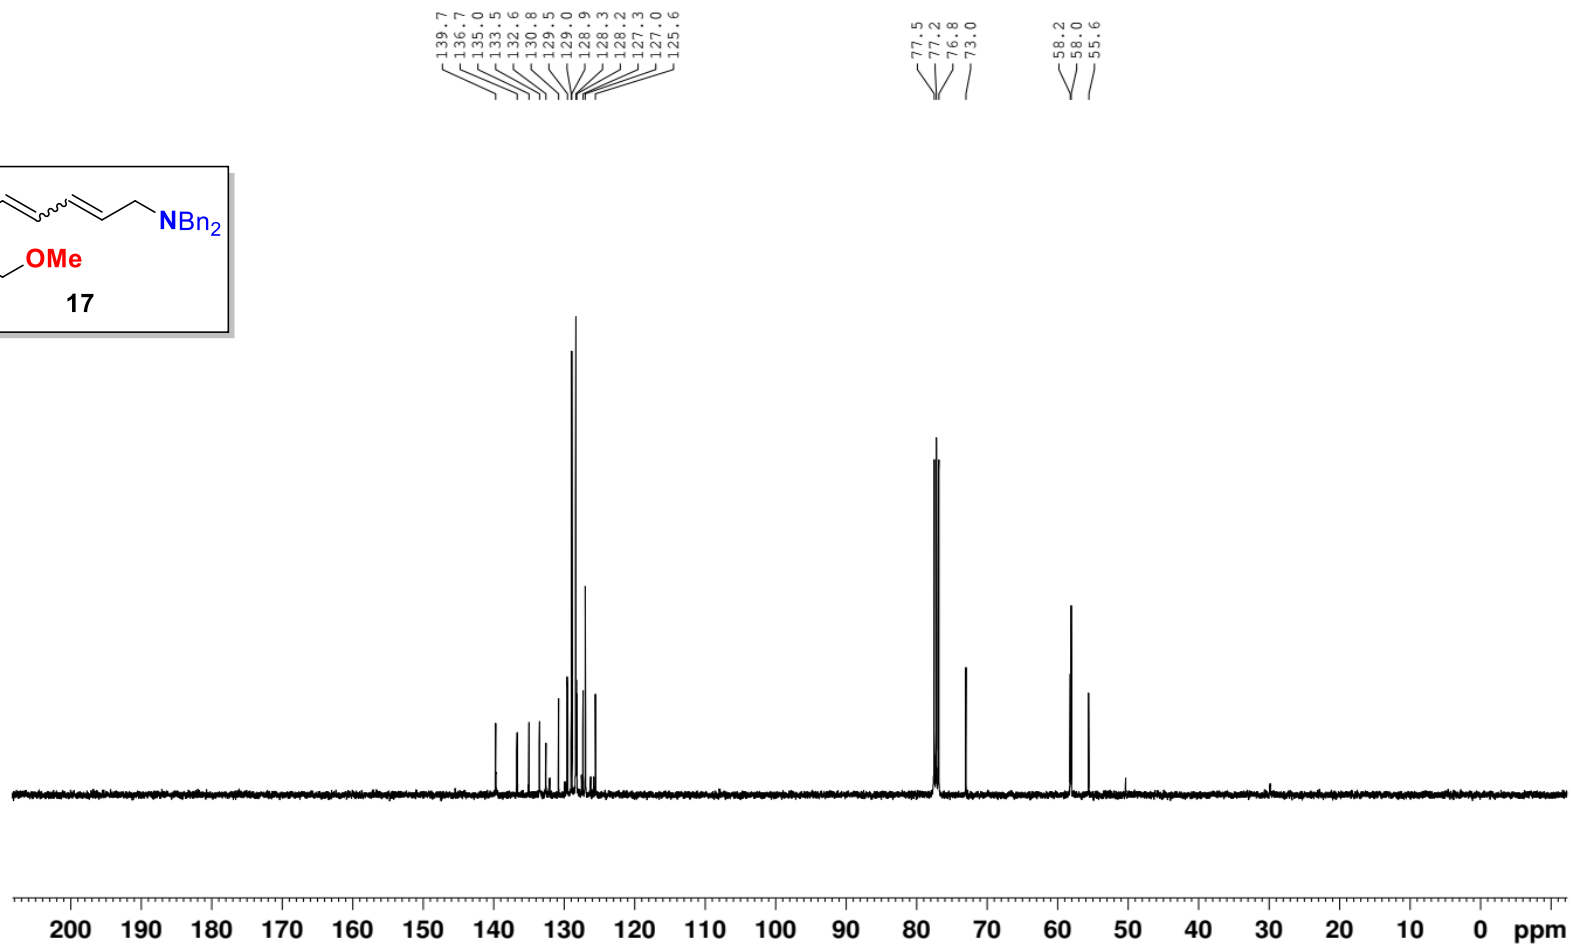

hy-P-18 + 19 <sup>1</sup>H NMR (500MHz CDCl<sub>3</sub>)

ybk-x210903-2-h

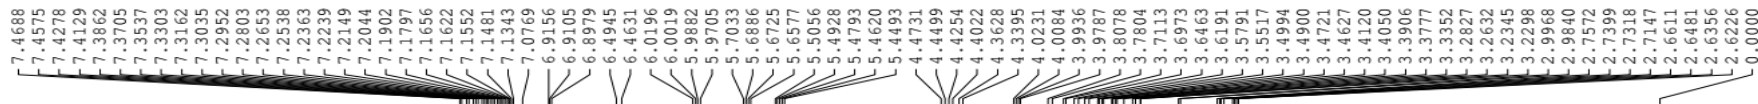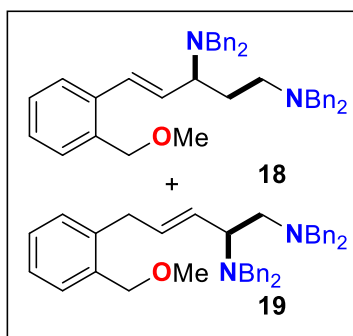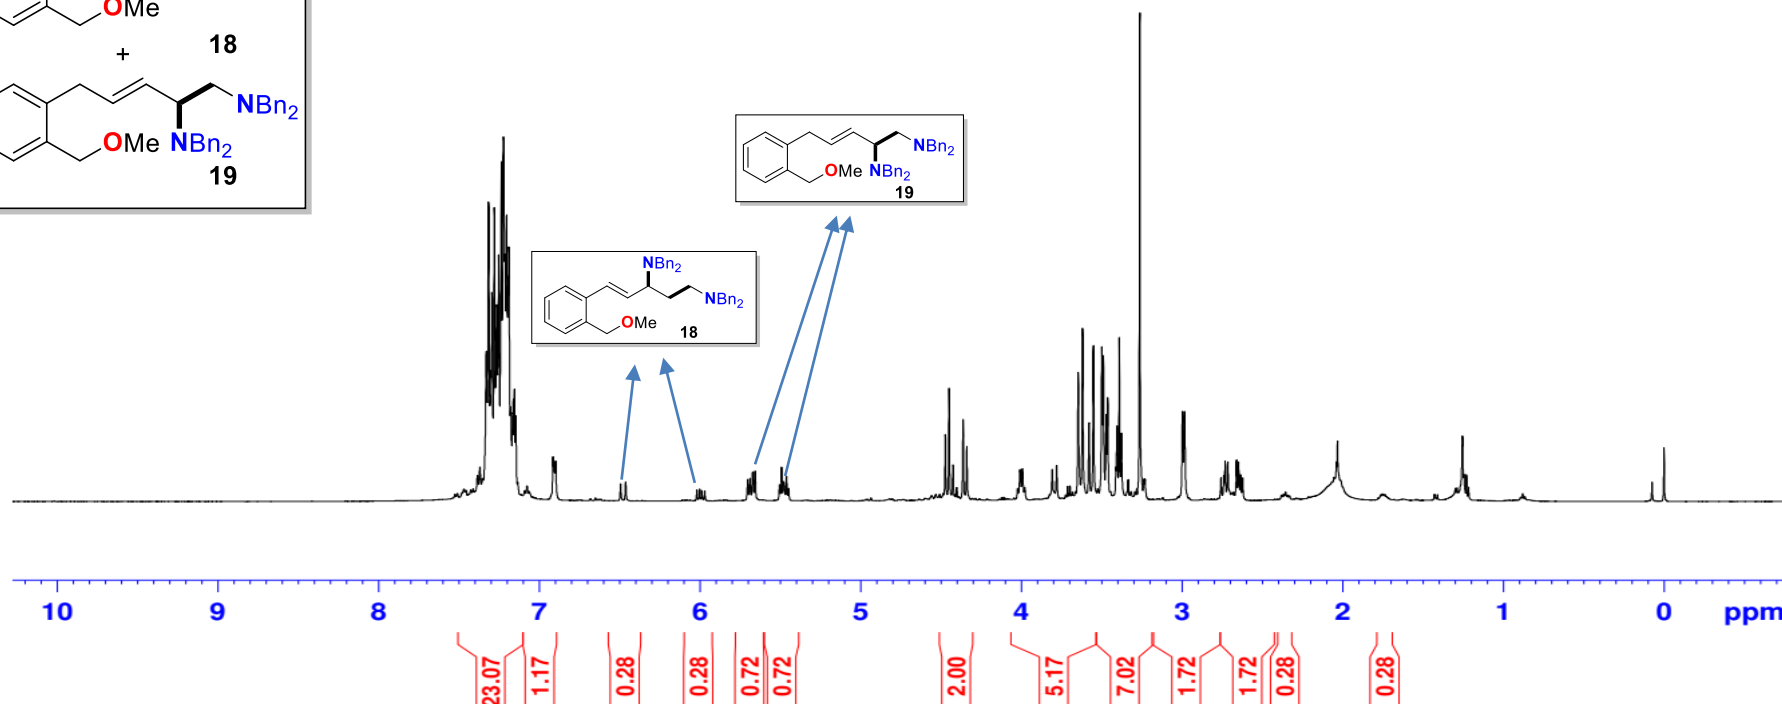

hy-P-18 + 19 <sup>13</sup>C (125MHz CDCl<sub>3</sub>)

ybk-x210913-2-c

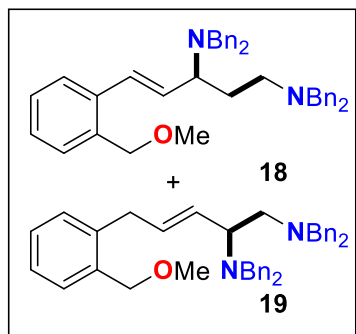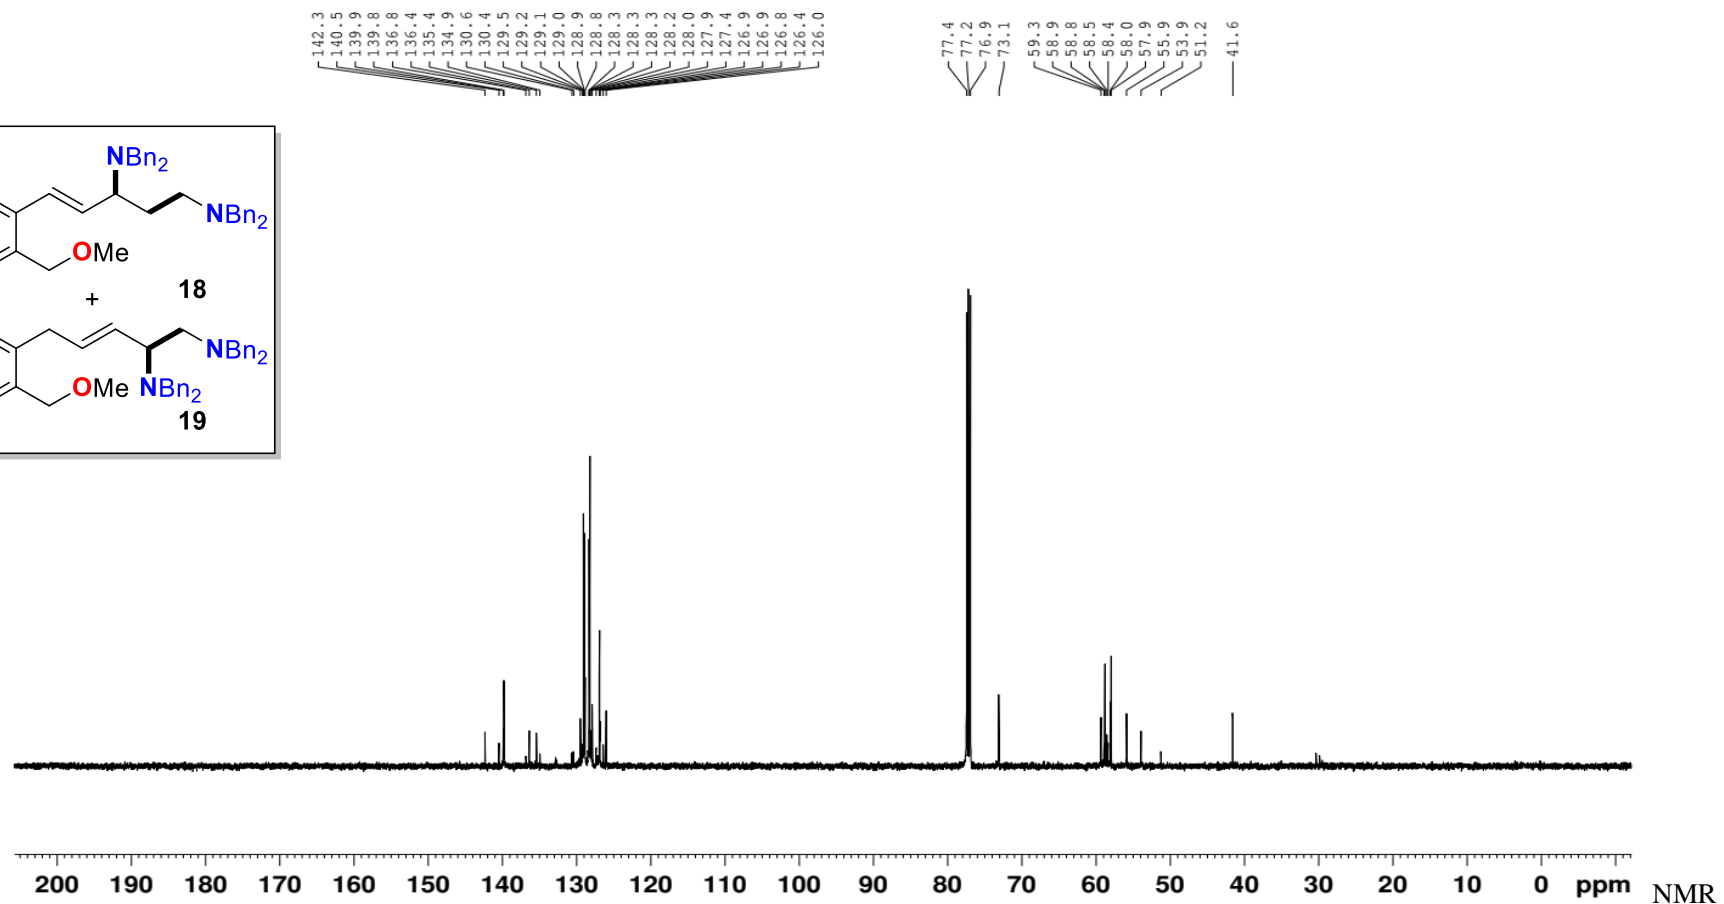

hy-P-20 <sup>1</sup>H NMR (400MHz CDCl<sub>3</sub>)

hy-x210720-1-2-h

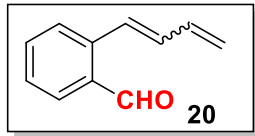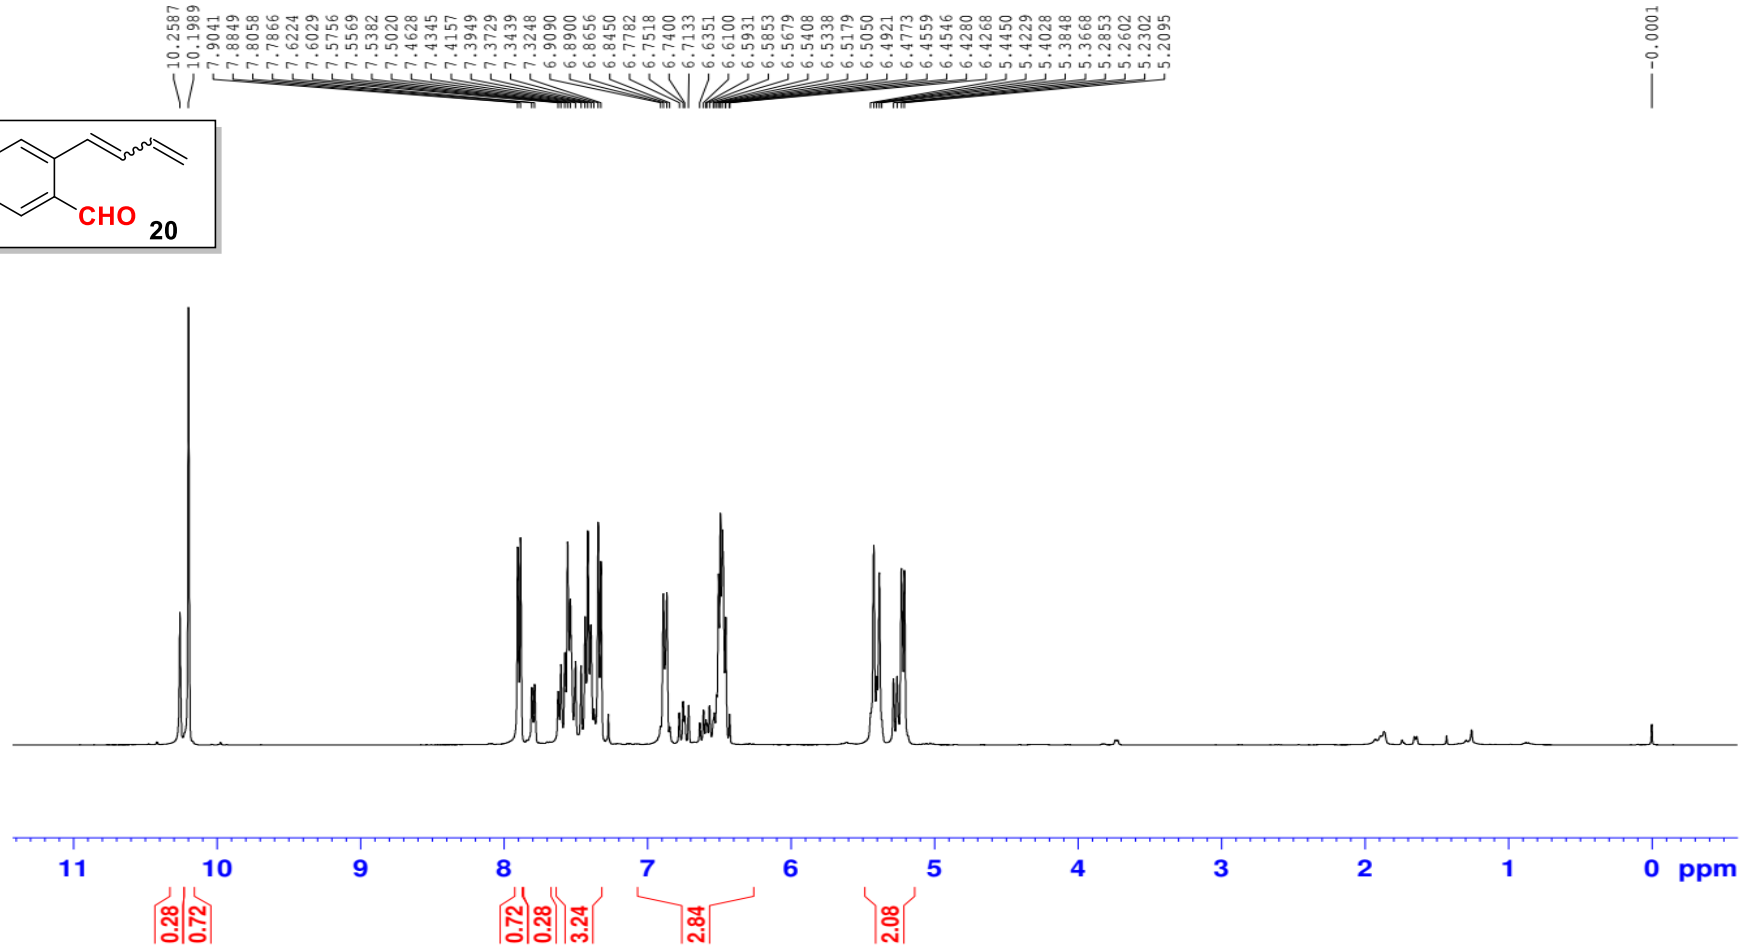



hy-P-20 <sup>13</sup>C NMR (100MHz CDCl<sub>3</sub>)

hy-x210720-1-2-c

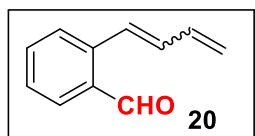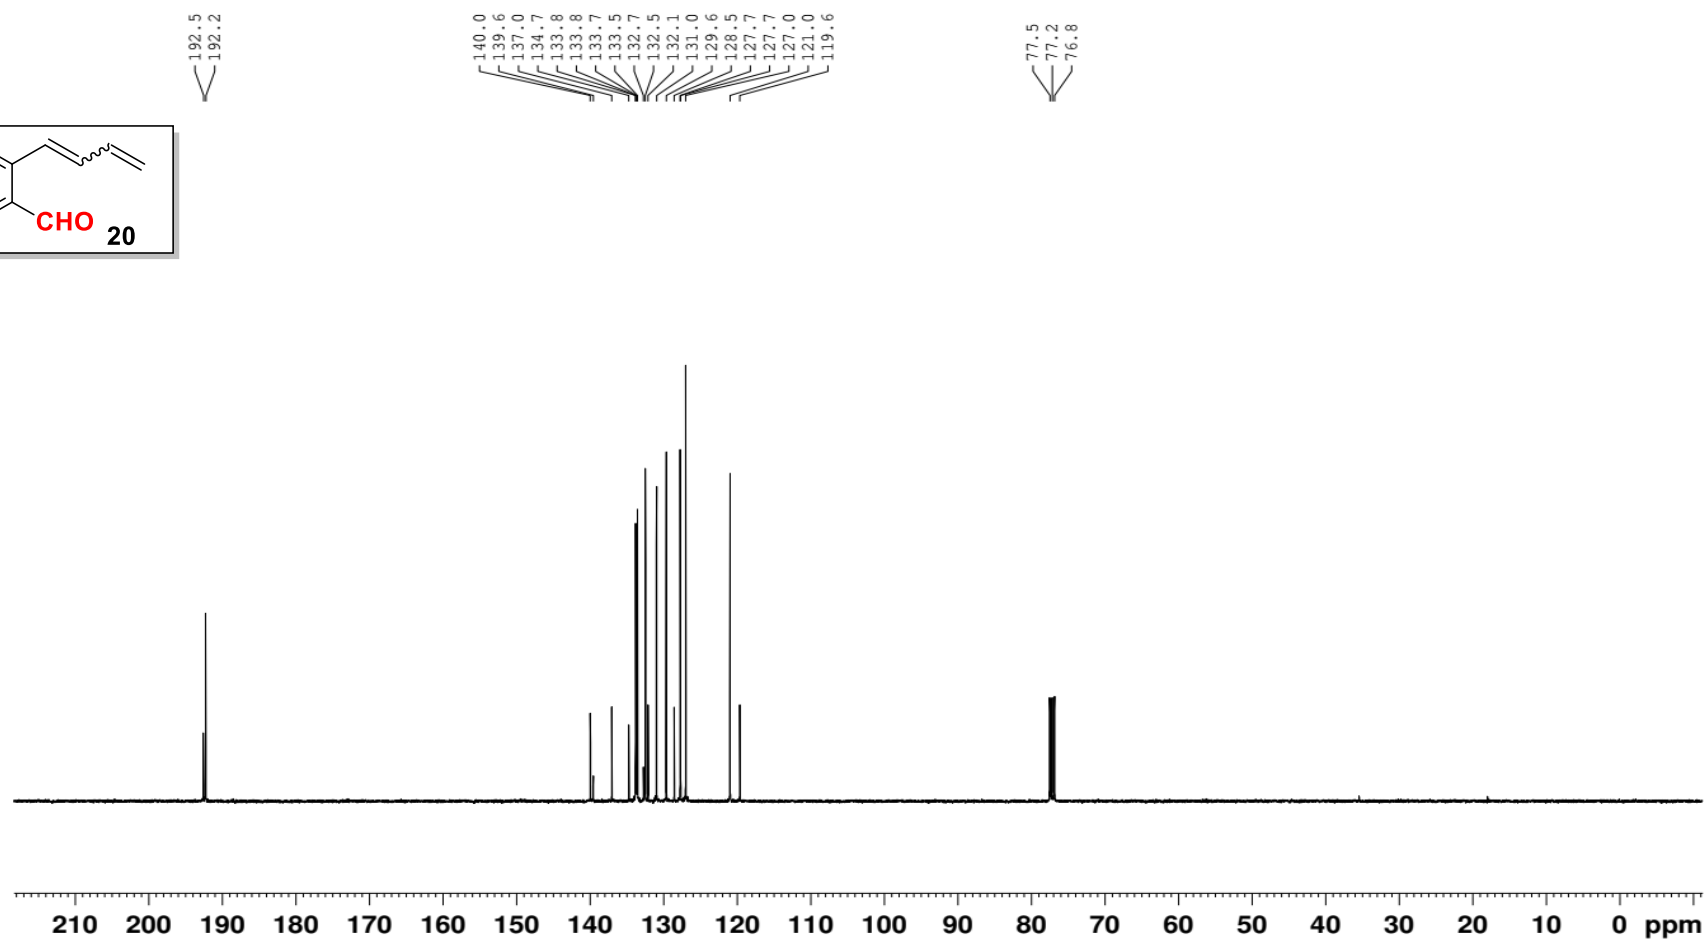

hy-P-21 <sup>1</sup>H NMR (500MHz CDCl<sub>3</sub>)

hy-x210930-1

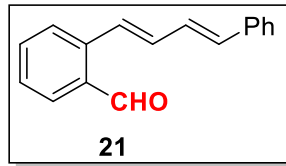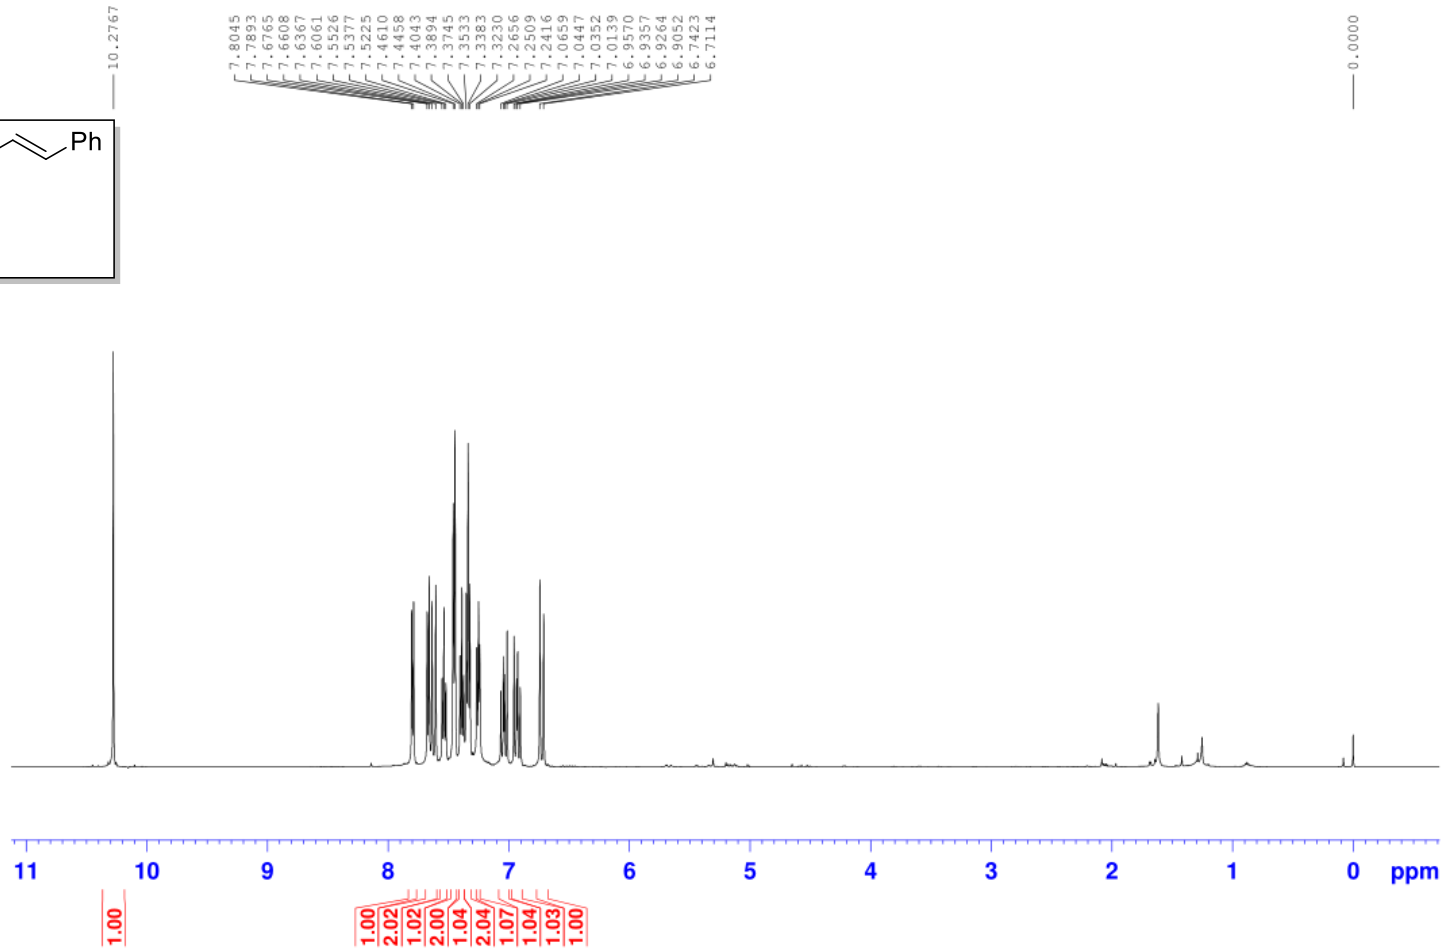

hy-P-21 <sup>13</sup>C NMR (125MHz CDCl<sub>3</sub>)

hy-x210930-1-c

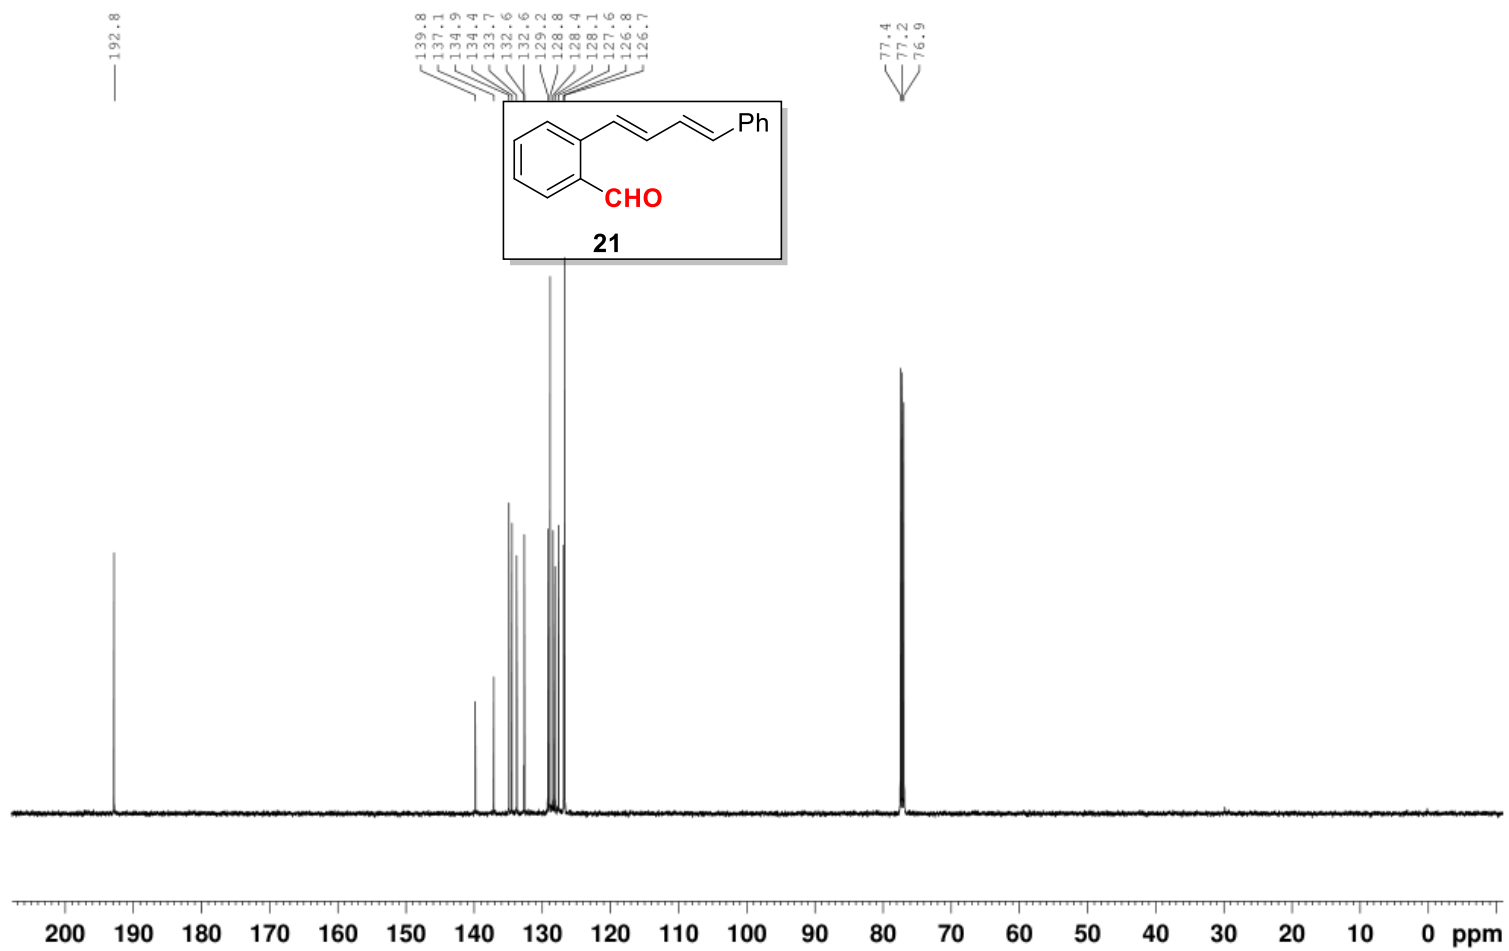

### 13. Computational data

#### Computational Methods

All density functional theory (DFT) calculations were conducted using the GAUSSIAN 16 series of programs. Density functional B3-LYP<sup>[13]</sup> with a standard 6-31G(d) basis set (SDD basis set for Pd) was used for geometry optimizations. Harmonic frequency calculations were performed for all stationary points to confirm them as local minima or transition structures, and to derive thermochemical corrections for the enthalpies and free energies. All minima had zero imaginary frequency and all transition states had only one imaginary frequency. The DFT method M06 functional<sup>[14]</sup> with larger basis set 6-311+G(d) (SDD basis set for Pd) was used to calculate single point energies with dichloromethane as solvent with a continuum solvation model (SMD<sup>[15]</sup>). The energies reported in this study are M06-calculated Gibbs free energies in methanol solvent. The optimized structures were displayed using CYLview.<sup>[16]</sup>

#### B3-LYP and M06 absolute calculation energies, enthalpies, and free energies.

| Geometry       | $E_{(\text{elec-B3-LYP})}^1$ | $H_{(\text{corr-B3-LYP})}^2$ | $G_{(\text{corr-B3-LYP})}^3$ | $E_{(\text{solv-M06})}^4$ | IF <sup>5</sup> |
|----------------|------------------------------|------------------------------|------------------------------|---------------------------|-----------------|
| A-L4           | -2624.010202                 | 0.883609                     | 0.751689                     | -2622.965038              | -               |
| 1a             | -501.560102                  | 0.213002                     | 0.163615                     | -501.3208005              | -               |
| B-L4           | -3125.589938                 | 1.098962                     | 0.940800                     | -3124.307206              | -               |
| C              | -3125.603981                 | 1.100529                     | 0.946547                     | -3124.334721              | -               |
| L4             | -1860.261462                 | 0.589732                     | 0.497893                     | -1859.535566              | -               |
| TS-<br>Inner-1 | -4985.848779                 | 1.690731                     | 1.465468                     | -4983.863877              | -321.2          |
| TS-<br>Inner-2 | -3125.566871                 | 1.099170                     | 0.944140                     | -3124.296357              | -235.5          |
| TS-<br>Inner-3 | -4358.186435                 | 1.651486                     | 1.427764                     | -4356.288961              | -269.8          |
| 2a             | -1232.605335                 | 0.549166                     | 0.459005                     | -1231.969734              | -               |
| A-L2           | -2306.261405                 | 0.969578                     | 0.836011                     | -2305.322676              | -               |
| E              | -2807.830132                 | 1.185929                     | 1.025236                     | -2806.669612              | -               |
| TS-<br>Outer   | -4040.43357                  | 1.734228                     | 1.507835                     | -4038.629369              | -627.3          |

|               |              |          |          |              |   |
|---------------|--------------|----------|----------|--------------|---|
| <b>1a'</b>    | -540.869653  | 0.242857 | 0.189825 | -540.599164  | - |
| <b>B'-L4</b>  | -3164.883582 | 1.129190 | 0.966522 | -3163.582533 | - |
| MeOH          | -115.712205  | 0.055706 | 0.028755 | -115.683225  | - |
| <b>G</b>      | -3241.315546 | 1.157528 | 0.985854 | -3240.001482 | - |
| <i>t</i> BuOH | -233.666735  | 0.143864 | 0.107237 | -233.5689236 | - |
| <b>G'</b>     | -3359.269285 | 1.245695 | 1.066792 | -3357.889705 | - |

<sup>1</sup>The electronic energy calculated by B3-LYP in gas phase. <sup>2</sup>The thermal correction to enthalpy calculated by B3-LYP in gas phase. <sup>3</sup>The thermal correction to Gibbs free energy calculated by B3-LYP in gas phase. <sup>4</sup>The electronic energy calculated by M06 in dichloromethane solvent. <sup>5</sup>The B3-LYP calculated imaginary frequencies for the transition states.

### **B3-LYP geometries for all the optimized compounds and transition states.**

A-L4

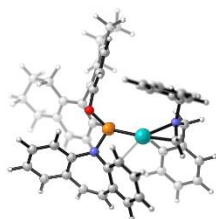

|    |             |             |             |
|----|-------------|-------------|-------------|
| Pd | -2.37020800 | 0.03453500  | -0.18870300 |
| N  | -3.42183400 | 1.43570400  | 1.09008200  |
| C  | -4.26453900 | 0.51745900  | 0.48173300  |
| C  | -3.43239000 | 2.88013300  | 0.64791000  |
| C  | -3.76704900 | 3.10967900  | -0.80243300 |
| C  | -2.76232000 | 3.06648900  | -1.77933100 |
| C  | -3.07510800 | 3.27411700  | -3.12375600 |
| C  | -4.39463700 | 3.53178600  | -3.50455100 |
| C  | -5.39936700 | 3.59268400  | -2.53614900 |
| C  | -5.08524000 | 3.38577100  | -1.19163600 |
| C  | -3.12407700 | 1.34668100  | 2.56931800  |
| C  | -3.13522700 | -0.03882100 | 3.15926000  |
| C  | -1.97622300 | -0.82863400 | 3.15079200  |
| C  | -1.99218100 | -2.10521900 | 3.71556200  |
| C  | -3.16110000 | -2.60261100 | 4.29671500  |
| C  | -4.31647200 | -1.81787900 | 4.31888200  |
| C  | -4.30093900 | -0.54100900 | 3.75556400  |
| H  | -4.90229300 | 0.89223700  | -0.31226300 |
| H  | -4.65433600 | -0.27742500 | 1.11039400  |
| H  | -4.15974700 | 3.39212600  | 1.29061500  |
| H  | -2.43939600 | 3.26846600  | 0.89008100  |
| H  | -1.73252600 | 2.89025900  | -1.48109500 |
| H  | -2.28851800 | 3.24945800  | -3.87288500 |
| H  | -4.63623700 | 3.70087500  | -4.54986700 |
| H  | -6.42309000 | 3.81219800  | -2.82461600 |
| H  | -5.86817900 | 3.45138000  | -0.43898200 |
| H  | -2.14781700 | 1.82144300  | 2.69882500  |
| H  | -3.87258000 | 1.97543400  | 3.06826900  |

|   |             |             |             |
|---|-------------|-------------|-------------|
| H | -1.05829500 | -0.44423100 | 2.71457500  |
| H | -1.08635700 | -2.70463000 | 3.71267900  |
| H | -3.16813500 | -3.59161300 | 4.74609400  |
| H | -5.22281800 | -2.19217400 | 4.78576600  |
| H | -5.19657100 | 0.07566500  | 3.79435700  |
| C | 3.08413400  | 0.28000000  | 0.45522600  |
| C | 2.19448800  | -0.67022500 | 0.96847900  |
| C | 2.62273400  | -1.86349400 | 1.53856200  |
| C | 3.98399000  | -2.13576300 | 1.55347700  |
| C | 4.90927700  | -1.26467800 | 0.96160300  |
| C | 4.46162800  | -0.05892200 | 0.38651200  |
| C | 2.54923100  | 1.58725200  | -0.04024100 |
| C | 1.58210000  | 1.58405400  | -1.05256800 |
| C | 1.13041700  | 2.75437000  | -1.65477900 |
| C | 1.61890000  | 3.97020800  | -1.19202500 |
| C | 2.50329900  | 4.03230800  | -0.10600200 |
| C | 2.95987800  | 2.83907100  | 0.49007600  |
| H | 1.89395200  | -2.55848100 | 1.94162000  |
| H | 4.33975200  | -3.06018900 | 2.00206500  |
| H | 0.42413100  | 2.69616200  | -2.47689400 |
| H | 1.28960000  | 4.89400900  | -1.66171400 |
| O | 0.81127700  | -0.41674800 | 0.93406700  |
| O | 1.04359700  | 0.36262700  | -1.49089700 |
| P | -0.04321900 | -0.37105900 | -0.48116600 |
| C | -0.77718500 | -4.39231700 | 0.23772400  |
| C | 0.53496600  | -4.52967400 | -0.05753600 |
| H | -1.17328500 | -5.01505900 | 1.03722200  |
| H | 1.09327900  | -5.25580100 | 0.53078200  |
| N | -0.12746000 | -1.90219400 | -1.21679600 |
| C | 1.28158200  | -3.93432700 | -1.16422300 |
| C | 2.37884200  | -4.64207500 | -1.68914100 |
| C | 3.08702300  | -4.17192600 | -2.79047500 |
| C | 2.70830100  | -2.97214000 | -3.39577700 |
| C | 1.63314700  | -2.24377800 | -2.88649100 |

|   |             |             |             |
|---|-------------|-------------|-------------|
| C | 0.93683100  | -2.70478700 | -1.76619000 |
| H | 2.66089500  | -5.58424600 | -1.22638600 |
| H | 3.92627800  | -4.74125000 | -3.17862300 |
| H | 3.25011900  | -2.59772500 | -4.25919700 |
| H | 1.34326900  | -1.30205400 | -3.33664300 |
| C | -4.14001200 | -3.27047200 | -1.05759100 |
| C | -3.13021200 | -3.98820400 | -0.41984800 |
| C | -1.77716600 | -3.59573500 | -0.47061300 |
| C | -1.46033800 | -2.43396200 | -1.20591200 |
| C | -2.47692400 | -1.70884900 | -1.87628400 |
| C | -3.81906500 | -2.13027900 | -1.79374900 |
| H | -5.16930200 | -3.60949700 | -0.99262800 |
| H | -3.38623400 | -4.87986400 | 0.14654000  |
| H | -2.19044200 | -0.94572100 | -2.59753700 |
| H | -4.58477700 | -1.58258500 | -2.33479500 |
| C | 6.38152000  | -1.64851500 | 0.98198400  |
| H | 6.78780100  | -1.40927700 | 1.97667200  |
| H | 6.47475300  | -2.73626400 | 0.87611100  |
| C | 7.22122300  | -0.93181900 | -0.08012700 |
| H | 8.28638900  | -1.11104500 | 0.10531300  |
| H | 6.99762000  | -1.34420700 | -1.07395200 |
| C | 6.90699900  | 0.56572800  | -0.07004800 |
| H | 7.13510700  | 0.98037000  | 0.92235500  |
| H | 7.53728200  | 1.10286400  | -0.78823800 |
| C | 5.43139300  | 0.80780700  | -0.40932100 |
| H | 5.19107500  | 1.86807500  | -0.30651500 |
| H | 5.27179900  | 0.57849000  | -1.47459900 |
| C | 3.79372500  | 2.89823100  | 1.76520500  |
| H | 3.11079600  | 2.71217900  | 2.60915700  |
| H | 4.51782500  | 2.08190100  | 1.79992100  |
| C | 4.49723700  | 4.24205000  | 1.98881000  |
| H | 4.93777600  | 4.25866200  | 2.99230200  |
| H | 5.32819300  | 4.35126100  | 1.27738200  |
| C | 3.51443300  | 5.40037800  | 1.80411000  |



|   |            |            |             |
|---|------------|------------|-------------|
| H | 3.99523900 | 6.36173700 | 2.01752100  |
| H | 2.68669900 | 5.29377300 | 2.51951100  |
| C | 2.96982000 | 5.39958400 | 0.37215700  |
| H | 2.14885100 | 6.12016900 | 0.27170700  |
| H | 3.76027100 | 5.75147300 | -0.30812300 |

**1a**

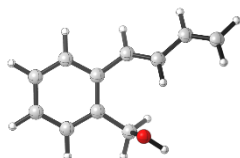

|   |             |             |             |
|---|-------------|-------------|-------------|
| C | -2.85436400 | -1.45916100 | -0.26030500 |
| C | -1.49757000 | -1.71404500 | -0.09153600 |
| C | -0.56497400 | -0.68109400 | 0.13534500  |
| C | -1.05402700 | 0.64650200  | 0.24755200  |
| C | -2.42348500 | 0.88316500  | 0.07854200  |
| C | -3.32455800 | -0.14736100 | -0.18323200 |
| H | -3.54133400 | -2.28041100 | -0.44668700 |
| H | -1.13350400 | -2.73700500 | -0.15194600 |
| H | -2.78817300 | 1.90402300  | 0.16646900  |
| H | -4.38157600 | 0.06966700  | -0.30983900 |
| C | 0.84282500  | -1.08168500 | 0.26729000  |
| H | 0.98525600  | -2.10536000 | 0.61868200  |
| C | 1.95141800  | -0.37769100 | -0.05425400 |
| H | 1.85480300  | 0.61751400  | -0.48322500 |
| C | -0.17200400 | 1.82075200  | 0.59323500  |
| H | 0.60422000  | 1.50808400  | 1.30592800  |
| H | -0.78472700 | 2.59421200  | 1.07918200  |
| O | 0.42160200  | 2.34852300  | -0.60162500 |
| H | 0.98260500  | 3.09582700  | -0.33765000 |
| C | 3.29467800  | -0.90953100 | 0.10137900  |
| H | 3.37553200  | -1.91425000 | 0.51867400  |
| C | 4.41474200  | -0.24793800 | -0.23272600 |
| H | 4.37870900  | 0.75440000  | -0.65370400 |
| H | 5.39929900  | -0.68636500 | -0.10062300 |

**B-L4**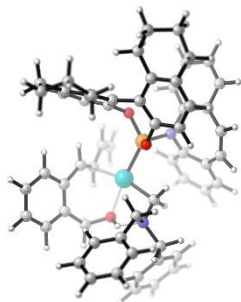

|    |             |             |             |
|----|-------------|-------------|-------------|
| Pd | -1.42875800 | -0.24167300 | -0.96670400 |
| N  | -2.84236100 | -0.15500100 | 1.58321500  |
| C  | -1.94734200 | -1.06438500 | 0.89332800  |
| C  | -3.87888500 | -0.88039200 | 2.38897700  |
| C  | -5.03668600 | -1.39734800 | 1.56546500  |
| C  | -6.06539100 | -0.52026300 | 1.18737600  |
| C  | -7.14571800 | -0.97245100 | 0.43023900  |
| C  | -7.21446100 | -2.31370400 | 0.04163900  |
| C  | -6.20328300 | -3.19684700 | 0.42186700  |
| C  | -5.12303000 | -2.74067900 | 1.18198800  |
| C  | -2.07216400 | 0.81746500  | 2.40761300  |
| C  | -2.90687800 | 1.93918900  | 2.98518200  |
| C  | -3.15124200 | 2.01536900  | 4.36241900  |
| C  | -3.91283000 | 3.05692800  | 4.89810200  |
| C  | -4.44024600 | 4.03874100  | 4.05889100  |
| C  | -4.19665200 | 3.97726800  | 2.68390200  |
| C  | -3.43409400 | 2.93727800  | 2.15297500  |
| H  | -2.48240400 | -1.96043400 | 0.57320600  |
| H  | -1.07499600 | -1.32443800 | 1.49907900  |
| H  | -3.40395300 | -1.69893300 | 2.95051000  |
| H  | -4.25476200 | -0.15983700 | 3.11920900  |
| H  | -6.02466200 | 0.51925100  | 1.50825800  |
| H  | -7.94287300 | -0.28572700 | 0.15825200  |
| H  | -8.05961000 | -2.66983700 | -0.54061000 |
| H  | -6.25972200 | -4.24386300 | 0.13701400  |
| H  | -4.34649400 | -3.43818400 | 1.48724800  |

|   |             |             |             |
|---|-------------|-------------|-------------|
| H | -1.55694000 | 0.28046100  | 3.22080800  |
| H | -1.29368500 | 1.22333600  | 1.75298500  |
| H | -2.73827700 | 1.25576800  | 5.02262200  |
| H | -4.09099600 | 3.10046700  | 5.96881400  |
| H | -5.03113000 | 4.85084200  | 4.47286300  |
| H | -4.59179100 | 4.74715500  | 2.02647100  |
| H | -3.23134600 | 2.91092300  | 1.08542200  |
| C | 3.46751900  | 0.47987900  | 0.73602500  |
| C | 2.43627000  | -0.21307800 | 1.37511700  |
| C | 2.63406900  | -0.93441500 | 2.54709400  |
| C | 3.92374300  | -1.03189700 | 3.05032700  |
| C | 5.01594700  | -0.47578300 | 2.36904100  |
| C | 4.79711500  | 0.27095700  | 1.19515900  |
| C | 3.15072500  | 1.40370900  | -0.39799300 |
| C | 2.48221400  | 0.92796600  | -1.53273000 |
| C | 2.36470200  | 1.69185000  | -2.69226200 |
| C | 2.83211300  | 2.99928100  | -2.68526400 |
| C | 3.36360600  | 3.57208000  | -1.52131900 |
| C | 3.51356700  | 2.78013300  | -0.36617400 |
| H | 1.79269000  | -1.41971500 | 3.02810700  |
| H | 4.09922800  | -1.58496100 | 3.97005600  |
| H | 1.93110800  | 1.25249300  | -3.58446500 |
| H | 2.76220000  | 3.59817100  | -3.59031900 |
| O | 1.13439600  | -0.16236400 | 0.84935800  |
| O | 1.95715800  | -0.37184300 | -1.56761400 |
| P | 0.72537900  | -0.86201700 | -0.58654500 |
| C | 0.57947400  | -4.24025800 | 1.68840900  |
| C | 1.92026900  | -4.06324000 | 1.67873000  |
| H | 0.12448500  | -4.54784600 | 2.62830900  |
| H | 2.44993700  | -4.23623100 | 2.61341500  |
| N | 1.02301000  | -2.52030700 | -0.64548900 |
| C | 2.77481800  | -3.81595800 | 0.51908800  |
| C | 4.08401400  | -4.33463100 | 0.52134000  |
| C | 4.91133900  | -4.22002900 | -0.59020300 |

|   |             |             |             |
|---|-------------|-------------|-------------|
| C | 4.44371000  | -3.57904800 | -1.74075800 |
| C | 3.16011300  | -3.03669100 | -1.76045100 |
| C | 2.33963800  | -3.12631800 | -0.63254300 |
| H | 4.43652000  | -4.85507800 | 1.40795100  |
| H | 5.91295900  | -4.63911800 | -0.56582900 |
| H | 5.07733500  | -3.49562400 | -2.61877300 |
| H | 2.79320900  | -2.52243100 | -2.64058300 |
| C | -2.29211200 | -5.16371700 | -0.56108100 |
| C | -1.45000200 | -5.06771400 | 0.54266400  |
| C | -0.31729600 | -4.22920300 | 0.53416600  |
| C | -0.08180100 | -3.45208200 | -0.62069700 |
| C | -0.91258900 | -3.56974500 | -1.73943300 |
| C | -2.01829600 | -4.41935000 | -1.71206500 |
| H | -3.14911800 | -5.83029900 | -0.53174400 |
| H | -1.64576900 | -5.66913900 | 1.42679300  |
| H | -0.69102400 | -2.98580800 | -2.62622600 |
| H | -2.66080900 | -4.49803400 | -2.58397600 |
| C | 6.40899600  | -0.67798600 | 2.94677100  |
| H | 6.54950100  | 0.03690700  | 3.77186600  |
| H | 6.47201500  | -1.67390300 | 3.40199900  |
| C | 7.53345200  | -0.48253500 | 1.92522900  |
| H | 8.50223200  | -0.46654900 | 2.43728200  |
| H | 7.55546800  | -1.33157800 | 1.22784000  |
| C | 7.30513700  | 0.81185700  | 1.14194800  |
| H | 7.28628000  | 1.66197100  | 1.83891800  |
| H | 8.12845500  | 0.99678500  | 0.44231900  |
| C | 5.98500800  | 0.74523000  | 0.36485500  |
| H | 5.77914900  | 1.70747500  | -0.10847100 |
| H | 6.09985900  | 0.03266200  | -0.46697300 |
| C | 3.96239400  | 3.42738300  | 0.94023800  |
| H | 3.05611500  | 3.60111300  | 1.54149100  |
| H | 4.57025600  | 2.74119500  | 1.53230200  |
| C | 4.69632600  | 4.76138100  | 0.75953700  |
| H | 4.83479500  | 5.23346800  | 1.73892500  |

|   |             |             |             |
|---|-------------|-------------|-------------|
| H | 5.70104200  | 4.58267200  | 0.35057100  |
| C | 3.91922800  | 5.68029500  | -0.18511200 |
| H | 4.40871500  | 6.65655300  | -0.27552600 |
| H | 2.91699800  | 5.86382000  | 0.22703200  |
| C | 3.80441600  | 5.02786500  | -1.56605800 |
| H | 3.11781600  | 5.59633100  | -2.20543900 |
| H | 4.78436900  | 5.07622000  | -2.06477000 |
| C | -1.95927300 | 5.00955600  | -1.88007600 |
| C | -1.32809900 | 3.81707400  | -2.22556000 |
| C | -2.01893500 | 2.58923900  | -2.25037800 |
| C | -3.37873400 | 2.57798200  | -1.84252800 |
| C | -3.99609500 | 3.78382100  | -1.49725300 |
| C | -3.30738800 | 4.99844200  | -1.52773900 |
| H | -1.39958900 | 5.94002000  | -1.88783800 |
| H | -0.27808900 | 3.83074800  | -2.50535700 |
| H | -5.03886500 | 3.76910400  | -1.18903300 |
| H | -3.81638100 | 5.91957200  | -1.26029700 |
| C | -1.23789600 | 1.43858000  | -2.74905800 |
| H | -0.17325900 | 1.64937900  | -2.81072500 |
| C | -1.66107700 | 0.29125500  | -3.38242400 |
| H | -2.72022300 | 0.07197900  | -3.48437500 |
| C | -4.18769700 | 1.30670100  | -1.72817000 |
| H | -4.40035500 | 0.86071700  | -2.70410000 |
| H | -5.15392900 | 1.51120100  | -1.25798400 |
| O | -3.53430400 | 0.27706300  | -0.95772800 |
| H | -3.62210400 | 0.40069900  | 0.03471000  |
| C | -0.77585500 | -0.56800900 | -4.16042100 |
| H | 0.29308400  | -0.37685400 | -4.08280300 |
| C | -1.21905000 | -1.53137700 | -4.98500100 |
| H | -2.27969400 | -1.74541500 | -5.09597800 |
| H | -0.53628400 | -2.12184200 | -5.58779100 |

C

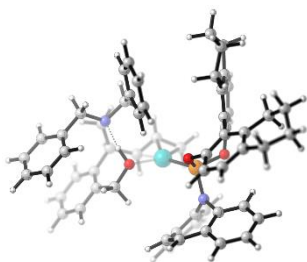

|    |             |             |             |
|----|-------------|-------------|-------------|
| Pd | 1.14775100  | 0.49665500  | -1.43687700 |
| N  | 3.02579800  | -2.46150300 | -0.19789400 |
| C  | 3.92396300  | -2.15669300 | -1.35256900 |
| C  | 1.76266200  | -3.10730800 | -0.69358900 |
| C  | 0.80054700  | -3.55625000 | 0.38765400  |
| C  | 0.17098900  | -2.63727400 | 1.24159300  |
| C  | -0.71089000 | -3.07940600 | 2.22932300  |
| C  | -0.98385100 | -4.44275500 | 2.37410800  |
| C  | -0.37377300 | -5.36350600 | 1.52064400  |
| C  | 0.51289100  | -4.92041600 | 0.53663100  |
| C  | 3.71121300  | -3.35922000 | 0.78928900  |
| C  | 4.67707200  | -2.66350700 | 1.72168500  |
| C  | 4.18699700  | -1.99667000 | 2.85543100  |
| C  | 5.06010300  | -1.39504300 | 3.76124900  |
| C  | 6.44020000  | -1.45413400 | 3.54706100  |
| C  | 6.93931800  | -2.12286100 | 2.42900100  |
| C  | 6.06170600  | -2.72751800 | 1.52611600  |
| H  | 3.56005400  | -2.69822000 | -2.23669700 |
| H  | 4.90985400  | -2.57311700 | -1.13118700 |
| H  | 1.27215800  | -2.37183500 | -1.34182300 |
| H  | 2.02128100  | -3.97427300 | -1.32195500 |
| H  | 0.36168300  | -1.57394500 | 1.13874200  |
| H  | -1.19251800 | -2.35464100 | 2.87980400  |
| H  | -1.66809100 | -4.78390800 | 3.14595100  |
| H  | -0.57946200 | -6.42522100 | 1.62353900  |
| H  | 0.99150700  | -5.64413000 | -0.11937600 |
| H  | 2.92500100  | -3.82044100 | 1.38801600  |
| H  | 4.22022600  | -4.17132200 | 0.24823800  |
| H  | 3.11451100  | -1.97339700 | 3.03862600  |

|   |             |             |             |
|---|-------------|-------------|-------------|
| H | 4.66673500  | -0.89788300 | 4.64399100  |
| H | 7.12225100  | -0.99485300 | 4.25701900  |
| H | 8.01119300  | -2.18604600 | 2.26461000  |
| H | 6.46165000  | -3.27242200 | 0.67372300  |
| C | -3.68577300 | -0.27325600 | 0.38294400  |
| C | -2.67973100 | 0.33472100  | 1.14261500  |
| C | -2.90743400 | 0.83345300  | 2.42067300  |
| C | -4.19645100 | 0.78152300  | 2.93104600  |
| C | -5.26451200 | 0.29381900  | 2.16478500  |
| C | -5.01887300 | -0.21623400 | 0.87551000  |
| C | -3.34845800 | -0.92102600 | -0.92392400 |
| C | -2.73248600 | -0.15976900 | -1.92448800 |
| C | -2.53082700 | -0.64750600 | -3.21237700 |
| C | -2.89241000 | -1.95965700 | -3.48985500 |
| C | -3.39849900 | -2.80091200 | -2.48881000 |
| C | -3.61875400 | -2.29006700 | -1.19364400 |
| H | -2.08795200 | 1.27310500  | 2.97820300  |
| H | -4.39143300 | 1.16518400  | 3.92948900  |
| H | -2.11538800 | 0.00437300  | -3.97393200 |
| H | -2.75634400 | -2.35269400 | -4.49470900 |
| O | -1.36796800 | 0.42776600  | 0.64313100  |
| O | -2.30222900 | 1.14455600  | -1.63015600 |
| P | -0.93642800 | 1.27430700  | -0.69379600 |
| C | 1.00901900  | 4.16567400  | 1.44645900  |
| C | -0.11845400 | 4.10188200  | 2.19251100  |
| H | 1.95026300  | 4.28002900  | 1.98156200  |
| H | 0.00433600  | 4.16195300  | 3.27261900  |
| N | -0.93485400 | 2.92051300  | -0.34118500 |
| C | -1.50547600 | 4.11119800  | 1.72954500  |
| C | -2.49096300 | 4.69437900  | 2.54877100  |
| C | -3.81554600 | 4.78839800  | 2.13383100  |
| C | -4.18936000 | 4.29512700  | 0.88119400  |
| C | -3.23721200 | 3.69951600  | 0.05482600  |
| C | -1.91108900 | 3.59024800  | 0.48053100  |

|   |             |             |             |
|---|-------------|-------------|-------------|
| H | -2.19719800 | 5.09284700  | 3.51653000  |
| H | -4.55388300 | 5.25108600  | 2.78204000  |
| H | -5.22052200 | 4.36811600  | 0.54874200  |
| H | -3.51503800 | 3.29731500  | -0.91270200 |
| C | 2.25287500  | 5.18908300  | -1.95969200 |
| C | 2.17519800  | 4.97823300  | -0.58560600 |
| C | 1.10101800  | 4.27172600  | -0.00905600 |
| C | 0.12396900  | 3.73758400  | -0.87753700 |
| C | 0.18280600  | 3.98139900  | -2.25379800 |
| C | 1.24576800  | 4.70252900  | -2.79901200 |
| H | 3.08495800  | 5.75101600  | -2.37372000 |
| H | 2.94203300  | 5.38732000  | 0.06727600  |
| H | -0.61277600 | 3.59905400  | -2.88699900 |
| H | 1.28412800  | 4.88848100  | -3.86853600 |
| C | -6.65969800 | 0.31479200  | 2.77194400  |
| H | -6.75337600 | -0.54327800 | 3.45514200  |
| H | -6.76913800 | 1.20773800  | 3.39951800  |
| C | -7.78545500 | 0.24567100  | 1.73554100  |
| H | -8.74490600 | 0.08089700  | 2.23898600  |
| H | -7.86549500 | 1.20533200  | 1.20582300  |
| C | -7.49645700 | -0.86768200 | 0.72651100  |
| H | -7.42214700 | -1.82912000 | 1.25476400  |
| H | -8.31722600 | -0.96655400 | 0.00666500  |
| C | -6.19158000 | -0.58559700 | -0.02758000 |
| H | -5.94363800 | -1.42793400 | -0.67618000 |
| H | -6.35525100 | 0.26351800  | -0.70973100 |
| C | -4.03351800 | -3.22953900 | -0.06712400 |
| H | -3.12671500 | -3.45836500 | 0.51218400  |
| H | -4.70385500 | -2.72940200 | 0.63476900  |
| C | -4.65769700 | -4.54522700 | -0.54682900 |
| H | -4.76906800 | -5.22497300 | 0.30598800  |
| H | -5.66880300 | -4.36133800 | -0.93754900 |
| C | -3.79738000 | -5.17908000 | -1.64198800 |
| H | -4.20224800 | -6.15045000 | -1.94844500 |



|   |             |             |             |
|---|-------------|-------------|-------------|
| H | -2.78705000 | -5.36202600 | -1.24974000 |
| C | -3.72624900 | -4.24193500 | -2.85146800 |
| H | -2.99361200 | -4.60848000 | -3.58110600 |
| H | -4.69705500 | -4.25724300 | -3.37001600 |
| C | 7.30851100  | 0.97170100  | -0.33108400 |
| C | 6.40600900  | 0.24757700  | -1.10047700 |
| C | 5.03856500  | 0.13904000  | -0.77669800 |
| C | 4.58194800  | 0.79475400  | 0.38806600  |
| C | 5.50951500  | 1.51991000  | 1.15787400  |
| C | 6.85124500  | 1.62246600  | 0.81392800  |
| H | 8.35213700  | 1.02977000  | -0.62558500 |
| H | 6.76863900  | -0.25077400 | -1.99696900 |
| H | 5.15801000  | 2.01267600  | 2.06230800  |
| H | 7.53144000  | 2.19662900  | 1.43616800  |
| C | 4.20361400  | -0.68232400 | -1.77131200 |
| H | 4.89113100  | -0.83987100 | -2.61864200 |
| C | 3.09231300  | 0.13562200  | -2.40479800 |
| H | 3.33525400  | 1.19919500  | -2.46686000 |
| C | 3.17000700  | 0.85882900  | 0.96849000  |
| H | 2.77057200  | 1.87091300  | 0.85339100  |
| H | 3.24267600  | 0.65922800  | 2.04422300  |
| O | 2.16926700  | -0.01459100 | 0.43875000  |
| H | 2.53664700  | -0.96934600 | 0.34066900  |
| C | 2.06584600  | -0.31818500 | -3.24610200 |
| H | 1.90692200  | -1.38143900 | -3.41282500 |
| C | 1.02889900  | 0.60858100  | -3.56804700 |
| H | 1.27947300  | 1.65035700  | -3.76112900 |
| H | 0.13858500  | 0.24386200  | -4.06935500 |

**L4**

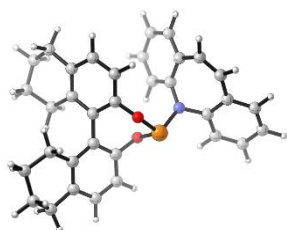

|   |             |             |             |
|---|-------------|-------------|-------------|
| C | -1.58524300 | 0.42107000  | 0.35029300  |
| C | -0.44068300 | 0.58610800  | 1.14552200  |
| C | -0.10354900 | 1.82538900  | 1.68751400  |
| C | -0.88268700 | 2.93010400  | 1.37824400  |
| C | -1.96880000 | 2.83239200  | 0.49734600  |
| C | -2.31384500 | 1.57730600  | -0.03711200 |
| C | -1.96790100 | -0.95324300 | -0.10153300 |
| C | -1.02983300 | -1.69767900 | -0.83131800 |
| C | -1.33662900 | -2.95113200 | -1.35711700 |
| C | -2.59810400 | -3.48338100 | -1.12548000 |
| C | -3.53543100 | -2.81375600 | -0.32676100 |
| C | -3.21586700 | -1.55127000 | 0.21065700  |
| H | 0.77276900  | 1.90296900  | 2.32154600  |
| H | -0.62445900 | 3.90091100  | 1.79582800  |
| H | -0.58399000 | -3.48889200 | -1.92507900 |
| H | -2.85304700 | -4.45763900 | -1.53702300 |
| O | 0.36860600  | -0.49781400 | 1.45900700  |
| O | 0.25134400  | -1.18458900 | -1.00218100 |
| P | 1.24508800  | -1.41467300 | 0.36049200  |
| C | 4.78718300  | 0.32565500  | 1.63692500  |
| C | 4.09202800  | 1.47353500  | 1.47881800  |
| H | 5.43878000  | 0.25590800  | 2.50650100  |
| H | 4.23760900  | 2.24541000  | 2.23334400  |
| N | 2.57305900  | -0.44721000 | -0.13067800 |
| C | 3.25883600  | 1.87139300  | 0.34420800  |
| C | 3.15357600  | 3.23975400  | 0.03186900  |
| C | 2.41360000  | 3.68237100  | -1.05977000 |
| C | 1.75664400  | 2.75419100  | -1.87057200 |
| C | 1.83684200  | 1.39316600  | -1.57880800 |
| C | 2.56285100  | 0.94703800  | -0.46887800 |
| H | 3.67587300  | 3.95825100  | 0.65942700  |
| H | 2.35191700  | 4.74473500  | -1.27924900 |
| H | 1.17587700  | 3.08737100  | -2.72625200 |
| H | 1.31593100  | 0.66325500  | -2.18625000 |

|   |             |             |             |
|---|-------------|-------------|-------------|
| C | 6.19532900  | -2.63921500 | -0.20777900 |
| C | 6.04385000  | -1.57989500 | 0.68290700  |
| C | 4.87444400  | -0.79776200 | 0.70609200  |
| C | 3.83485700  | -1.13170200 | -0.19061600 |
| C | 3.99933500  | -2.18299700 | -1.09820100 |
| C | 5.17038200  | -2.94138000 | -1.10635900 |
| H | 7.10960200  | -3.22610800 | -0.20123500 |
| H | 6.84400400  | -1.34054300 | 1.37928700  |
| H | 3.19077700  | -2.40373700 | -1.78884400 |
| H | 5.27637100  | -3.76586700 | -1.80573700 |
| C | -2.75191900 | 4.09440400  | 0.16578200  |
| H | -3.44975400 | 4.30533000  | 0.99145000  |
| H | -2.06575300 | 4.95009700  | 0.13031800  |
| C | -3.55105900 | 3.99628200  | -1.13750300 |
| H | -4.22299000 | 4.85832500  | -1.23095800 |
| H | -2.86717900 | 4.03074200  | -1.99751400 |
| C | -4.33478200 | 2.68212100  | -1.16808700 |
| H | -5.01747900 | 2.64668700  | -0.30642500 |
| H | -4.95948700 | 2.61903100  | -2.06764700 |
| C | -3.37950300 | 1.48369000  | -1.12476200 |
| H | -3.94790000 | 0.55480200  | -1.04337200 |
| H | -2.85638900 | 1.41483100  | -2.09164300 |
| C | -4.14866300 | -0.89906200 | 1.22555000  |
| H | -3.73430900 | -1.09981300 | 2.22594900  |
| H | -4.13936300 | 0.18855200  | 1.12733700  |
| C | -5.58891100 | -1.42225900 | 1.17581800  |
| H | -6.14989000 | -1.02974700 | 2.03281700  |
| H | -6.09127200 | -1.04842100 | 0.27154000  |
| C | -5.60503900 | -2.95276000 | 1.16693300  |
| H | -6.63244700 | -3.33612900 | 1.19252900  |
| H | -5.10300700 | -3.32632000 | 2.07055600  |
| C | -4.88439300 | -3.47399800 | -0.08061600 |
| H | -4.75218700 | -4.56161000 | -0.02007700 |
| H | -5.52744400 | -3.29946000 | -0.95760200 |

### TS-Inner-1

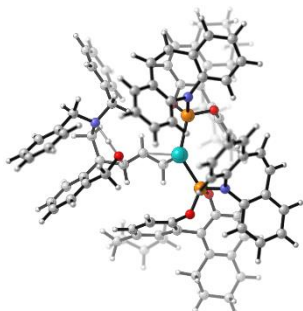

|   |            |            |             |
|---|------------|------------|-------------|
| N | 3.09211400 | 3.72263600 | -0.43263500 |
| C | 2.40982800 | 4.00457100 | -1.73544600 |
| C | 3.80276300 | 2.39101300 | -0.43293700 |
| C | 4.96022500 | 2.23909000 | -1.40525300 |
| C | 6.26229400 | 2.63382700 | -1.05708000 |
| C | 7.31930900 | 2.50200300 | -1.95834300 |
| C | 7.09532200 | 1.96262000 | -3.22692000 |
| C | 5.81305300 | 1.54008600 | -3.57994100 |
| C | 4.75920900 | 1.67196800 | -2.67395500 |
| C | 4.04699900 | 4.79911500 | -0.01334500 |
| C | 3.45315400 | 6.02047400 | 0.65304600  |
| C | 3.15393800 | 5.98794100 | 2.02419800  |
| C | 2.70463100 | 7.13177900 | 2.68434400  |
| C | 2.55562300 | 8.33018800 | 1.98082300  |
| C | 2.85792000 | 8.37661800 | 0.61926500  |
| C | 3.30787300 | 7.22950300 | -0.03751800 |
| H | 2.69849400 | 3.23856900 | -2.45894500 |
| H | 2.76780800 | 4.95694300 | -2.13692300 |
| H | 4.14427600 | 2.23548400 | 0.59412800  |
| H | 3.05457700 | 1.62135600 | -0.62691400 |
| H | 6.45820700 | 3.03706000 | -0.06677000 |
| H | 8.31856800 | 2.81313400 | -1.66675400 |
| H | 7.91793900 | 1.85770900 | -3.92851300 |
| H | 5.63391900 | 1.09417000 | -4.55414600 |
| H | 3.77536500 | 1.29791000 | -2.94715500 |
| H | 4.72638200 | 4.33082100 | 0.70308500  |

|    |             |             |             |
|----|-------------|-------------|-------------|
| H  | 4.65615300  | 5.09923900  | -0.87512600 |
| H  | 3.30069800  | 5.06412400  | 2.58175000  |
| H  | 2.49368400  | 7.09568200  | 3.74984200  |
| H  | 2.22066100  | 9.22614200  | 2.49585600  |
| H  | 2.75668900  | 9.30806100  | 0.06985900  |
| H  | 3.56777200  | 7.28178000  | -1.09214800 |
| C  | -0.43373300 | 7.67332000  | -1.56104100 |
| C  | 0.10360900  | 6.46821300  | -2.00725200 |
| C  | 0.30969300  | 5.39387800  | -1.12940300 |
| C  | -0.03344400 | 5.54746700  | 0.22299000  |
| C  | -0.57481900 | 6.76103700  | 0.66716400  |
| C  | -0.77837100 | 7.81911500  | -0.21494300 |
| H  | -0.59249500 | 8.48944800  | -2.25988800 |
| H  | 0.35651400  | 6.34874200  | -3.05890500 |
| H  | -0.83552500 | 6.87697400  | 1.71686700  |
| H  | -1.20254900 | 8.75194100  | 0.14484700  |
| C  | 0.85351100  | 4.07765200  | -1.67921200 |
| H  | 0.54023200  | 4.02502500  | -2.73232800 |
| C  | 0.16005700  | 2.90758600  | -0.99659300 |
| H  | -0.88413500 | 3.12218800  | -0.77303900 |
| C  | 0.12676300  | 4.42074000  | 1.22326100  |
| H  | -0.84571600 | 4.05986500  | 1.57080200  |
| H  | 0.69798000  | 4.75144100  | 2.09662000  |
| O  | 0.79606700  | 3.26505500  | 0.68166500  |
| H  | 1.80582200  | 3.49598500  | 0.43642600  |
| C  | 0.38045300  | 1.53449000  | -1.32156300 |
| H  | 1.35609700  | 1.18990900  | -1.64524500 |
| C  | -0.67574800 | 0.62553600  | -1.29928700 |
| H  | -1.69433700 | 1.00057800  | -1.24580800 |
| H  | -0.56571500 | -0.32879900 | -1.80917100 |
| Pd | -0.39017600 | -0.13066600 | 0.78355000  |
| C  | 2.99109200  | -3.24362800 | -1.80550400 |
| C  | 3.44180800  | -2.03440500 | -1.25750800 |
| C  | 4.79251100  | -1.69788500 | -1.24031600 |

|   |             |             |             |
|---|-------------|-------------|-------------|
| C | 5.71563700  | -2.61330000 | -1.72856800 |
| C | 5.32086500  | -3.87944000 | -2.18029700 |
| C | 3.95209300  | -4.20995000 | -2.20173600 |
| C | 1.51955900  | -3.48314300 | -1.91498200 |
| C | 0.74512900  | -3.42669000 | -0.75004300 |
| C | -0.61510000 | -3.71854300 | -0.74709700 |
| C | -1.22340700 | -4.04029900 | -1.95418500 |
| C | -0.51149200 | -4.02091600 | -3.16137200 |
| C | 0.86562600  | -3.72135100 | -3.15172500 |
| H | 5.10172500  | -0.74211500 | -0.83636900 |
| H | 6.77281800  | -2.35685300 | -1.72798600 |
| H | -1.17147400 | -3.68056300 | 0.18268000  |
| H | -2.28496800 | -4.27591500 | -1.97104300 |
| O | 2.52246700  | -1.11495200 | -0.73651300 |
| O | 1.35970800  | -3.05729700 | 0.45272600  |
| P | 1.61897600  | -1.42955800 | 0.65455700  |
| C | 5.24329100  | -0.14650000 | 2.26386500  |
| C | 5.60058500  | -1.42657400 | 2.01850100  |
| H | 5.99430400  | 0.61920500  | 2.07512800  |
| H | 6.60871200  | -1.59432000 | 1.64430600  |
| N | 2.65081400  | -1.54169400 | 2.01300200  |
| C | 4.85001600  | -2.63919400 | 2.33330400  |
| C | 5.56913900  | -3.80932000 | 2.64430600  |
| C | 4.92401000  | -4.97175000 | 3.05126400  |
| C | 3.53136400  | -4.98611100 | 3.16105800  |
| C | 2.79720600  | -3.84574400 | 2.84045200  |
| C | 3.44115100  | -2.68566600 | 2.39998700  |
| H | 6.65407300  | -3.78595400 | 2.58030300  |
| H | 5.50292600  | -5.85910800 | 3.29027400  |
| H | 3.01646800  | -5.88598100 | 3.48540800  |
| H | 1.71552000  | -3.84874300 | 2.90230600  |
| C | 2.93552100  | 2.02690300  | 4.29075000  |
| C | 4.05519600  | 1.53637000  | 3.62447800  |
| C | 4.01283000  | 0.33392700  | 2.88960500  |

|   |             |             |             |
|---|-------------|-------------|-------------|
| C | 2.78165600  | -0.36026600 | 2.82468800  |
| C | 1.66680500  | 0.12181000  | 3.51995700  |
| C | 1.73579300  | 1.31306000  | 4.24289300  |
| H | 3.00593000  | 2.94644800  | 4.86576900  |
| H | 4.99976800  | 2.07186000  | 3.68862700  |
| H | 0.74549800  | -0.45011700 | 3.49483900  |
| H | 0.85823600  | 1.66942900  | 4.77454800  |
| C | 6.39108800  | -4.85022400 | -2.65736300 |
| H | 6.67887500  | -4.57686400 | -3.68444900 |
| H | 7.29606000  | -4.72146100 | -2.05064300 |
| C | 5.94206400  | -6.31494000 | -2.64562000 |
| H | 6.68405900  | -6.93636700 | -3.16055700 |
| H | 5.88498000  | -6.67915100 | -1.61028200 |
| C | 4.56645700  | -6.44314300 | -3.30399900 |
| H | 4.62352300  | -6.08065500 | -4.34069100 |
| H | 4.25302200  | -7.49262300 | -3.35442100 |
| C | 3.52021700  | -5.63600100 | -2.52627800 |
| H | 2.56483000  | -5.64964300 | -3.05532000 |
| H | 3.32509700  | -6.14187900 | -1.56773200 |
| C | 1.61292700  | -3.53684600 | -4.46853800 |
| H | 1.68520400  | -2.45382900 | -4.65729800 |
| H | 2.64598300  | -3.88093700 | -4.38644600 |
| C | 0.92946900  | -4.19917200 | -5.67067200 |
| H | 1.43381600  | -3.88900300 | -6.59360600 |
| H | 1.03637800  | -5.29147500 | -5.60476500 |
| C | -0.55692500 | -3.83733200 | -5.71115600 |
| H | -1.03997900 | -4.25748100 | -6.60111600 |
| H | -0.66406100 | -2.74504800 | -5.77716500 |
| C | -1.25329600 | -4.35305300 | -4.44782500 |
| H | -2.27769300 | -3.96505000 | -4.38790000 |
| H | -1.35162900 | -5.44718900 | -4.52093200 |
| C | -5.28844200 | -0.00520600 | -0.82862000 |
| C | -4.56889200 | -1.19154400 | -0.63587600 |
| C | -5.13050200 | -2.44153000 | -0.88165900 |

|   |             |             |             |
|---|-------------|-------------|-------------|
| C | -6.46144700 | -2.51330000 | -1.26210700 |
| C | -7.25735200 | -1.36223700 | -1.34996800 |
| C | -6.67968000 | -0.10104800 | -1.11274300 |
| C | -4.60273200 | 1.31806100  | -0.68581000 |
| C | -3.95552600 | 1.62282700  | 0.52159400  |
| C | -3.45749900 | 2.89775700  | 0.78510900  |
| C | -3.54588800 | 3.87207900  | -0.20259900 |
| C | -4.06215400 | 3.57247700  | -1.47246100 |
| C | -4.57850600 | 2.28569700  | -1.72697700 |
| H | -4.52827000 | -3.33196600 | -0.74040800 |
| H | -6.91064700 | -3.48451700 | -1.45529800 |
| H | -3.02179900 | 3.10131900  | 1.75862800  |
| H | -3.18044300 | 4.87721800  | -0.00411200 |
| O | -3.22863300 | -1.16021600 | -0.24282900 |
| O | -3.80538900 | 0.63584000  | 1.48828200  |
| P | -2.63640600 | -0.55356100 | 1.18034300  |
| C | -1.82914400 | -4.21356500 | 2.99779200  |
| C | -2.98879500 | -4.54996600 | 2.38710900  |
| H | -1.03139400 | -4.95421400 | 2.99573000  |
| H | -3.04170400 | -5.53988300 | 1.93659200  |
| N | -3.06587700 | -1.65028200 | 2.40278500  |
| C | -4.24523300 | -3.80079700 | 2.39773500  |
| C | -5.46086800 | -4.51060800 | 2.38532000  |
| C | -6.68315200 | -3.85466000 | 2.49004900  |
| C | -6.71591100 | -2.46308700 | 2.61126400  |
| C | -5.52773600 | -1.73399800 | 2.60618900  |
| C | -4.30054400 | -2.39054000 | 2.47241000  |
| H | -5.43177000 | -5.59522700 | 2.31621400  |
| H | -7.60666300 | -4.42643800 | 2.48856400  |
| H | -7.66524400 | -1.94348700 | 2.70277300  |
| H | -5.53971500 | -0.65321100 | 2.68011500  |
| C | -0.52960500 | -2.02185100 | 5.77228200  |
| C | -0.71486500 | -3.10210300 | 4.91371700  |
| C | -1.57806600 | -3.01954900 | 3.80420100  |



|   |              |             |             |
|---|--------------|-------------|-------------|
| C | -2.21572600  | -1.78470900 | 3.55350100  |
| C | -2.04199000  | -0.70458000 | 4.42628100  |
| C | -1.20348300  | -0.82047200 | 5.53549200  |
| H | 0.12952100   | -2.11950800 | 6.62982400  |
| H | -0.20857700  | -4.04305900 | 5.11365100  |
| H | -2.58054700  | 0.21784800  | 4.22937300  |
| H | -1.07822900  | 0.02093000  | 6.21102600  |
| C | -8.72423800  | -1.52349800 | -1.72149200 |
| H | -8.79557400  | -1.65653000 | -2.81206400 |
| H | -9.10982400  | -2.45210000 | -1.28293600 |
| C | -9.59808700  | -0.33419600 | -1.31202200 |
| H | -10.59296000 | -0.42959700 | -1.76224300 |
| H | -9.74119700  | -0.33302300 | -0.22223600 |
| C | -8.92646700  | 0.97339300  | -1.73594500 |
| H | -8.78600800  | 0.97384700  | -2.82658700 |
| H | -9.56201900  | 1.83507000  | -1.49986900 |
| C | -7.57154900  | 1.13498800  | -1.03642400 |
| H | -7.05894400  | 2.02051400  | -1.41729200 |
| H | -7.74868800  | 1.34345300  | 0.03050000  |
| C | -5.00593800  | 1.90645500  | -3.14131300 |
| H | -4.17726800  | 1.33686500  | -3.59108400 |
| H | -5.84948900  | 1.21397100  | -3.12401100 |
| C | -5.32228100  | 3.10674500  | -4.04109700 |
| H | -5.46136800  | 2.76187400  | -5.07232500 |
| H | -6.27199400  | 3.56572300  | -3.73115000 |
| C | -4.20535600  | 4.14973200  | -3.95951200 |
| H | -4.39537000  | 4.98416300  | -4.64459900 |
| H | -3.25657500  | 3.69078700  | -4.27339600 |
| C | -4.08333000  | 4.67245700  | -2.52450200 |
| H | -3.18873100  | 5.29870000  | -2.41601900 |
| H | -4.93748900  | 5.33489600  | -2.31640600 |

**TS-Inner-2**

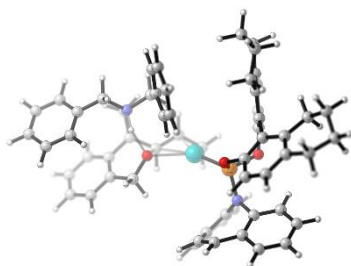

|    |             |             |             |
|----|-------------|-------------|-------------|
| Pd | 0.64210300  | 0.71395700  | -1.15031900 |
| N  | 3.76644700  | -1.92936000 | -0.22241000 |
| C  | 4.53614400  | -1.43268200 | -1.43311600 |
| C  | 2.48587500  | -2.64944600 | -0.64521600 |
| C  | 1.62859400  | -3.12978400 | 0.50088200  |
| C  | 0.90895200  | -2.21886200 | 1.28992100  |
| C  | 0.08801700  | -2.67676500 | 2.32066500  |
| C  | -0.02539900 | -4.04701200 | 2.57307200  |
| C  | 0.68207500  | -4.96032000 | 1.78846400  |
| C  | 1.50491000  | -4.50257400 | 0.75765900  |
| C  | 4.57618000  | -2.83837300 | 0.69160400  |
| C  | 5.87072700  | -2.28401800 | 1.22375000  |
| C  | 5.87625800  | -1.39615000 | 2.30864400  |
| C  | 7.08110400  | -0.95022500 | 2.84877000  |
| C  | 8.29488500  | -1.39398600 | 2.31733400  |
| C  | 8.30092500  | -2.28503000 | 1.24371200  |
| C  | 7.09371900  | -2.72845500 | 0.70166500  |
| H  | 4.11777100  | -1.92520400 | -2.31494200 |
| H  | 5.57009000  | -1.76164300 | -1.32473600 |
| H  | 1.93780500  | -1.93182600 | -1.25751500 |
| H  | 2.79690300  | -3.48704100 | -1.27732200 |
| H  | 0.99041900  | -1.15232200 | 1.09638100  |
| H  | -0.47279500 | -1.96237800 | 2.91589000  |
| H  | -0.66577300 | -4.40125100 | 3.37579400  |
| H  | 0.59517600  | -6.02638600 | 1.97696000  |
| H  | 2.04808700  | -5.21863300 | 0.14482800  |
| H  | 3.89982600  | -3.09444200 | 1.50832000  |
| H  | 4.76016500  | -3.74985200 | 0.11336500  |
| H  | 4.93529400  | -1.06494300 | 2.74196800  |

|   |             |             |             |
|---|-------------|-------------|-------------|
| H | 7.07381000  | -0.26507200 | 3.69101000  |
| H | 9.23254200  | -1.05378200 | 2.74711200  |
| H | 9.24119000  | -2.64469400 | 0.83623100  |
| H | 7.10319400  | -3.44611400 | -0.11623300 |
| C | -3.92874800 | -0.84721100 | 0.34787700  |
| C | -3.17415600 | 0.01347300  | 1.15521000  |
| C | -3.64674900 | 0.48830700  | 2.37484400  |
| C | -4.93159300 | 0.14584000  | 2.76974200  |
| C | -5.76919800 | -0.61708200 | 1.94400400  |
| C | -5.27863000 | -1.10066700 | 0.71627100  |
| C | -3.31995100 | -1.43187700 | -0.88796100 |
| C | -2.81270400 | -0.56756100 | -1.86613300 |
| C | -2.34828800 | -1.02759300 | -3.09534300 |
| C | -2.34599700 | -2.39618600 | -3.33446000 |
| C | -2.74058700 | -3.30805700 | -2.34487100 |
| C | -3.21336400 | -2.83118100 | -1.10580500 |
| H | -3.01706300 | 1.13439300  | 2.97609200  |
| H | -5.31306700 | 0.51023300  | 3.72060000  |
| H | -2.00194200 | -0.31540000 | -3.83746800 |
| H | -2.00465500 | -2.77235300 | -4.29633000 |
| O | -1.87820100 | 0.39495800  | 0.77890900  |
| O | -2.74625500 | 0.80478700  | -1.59286700 |
| P | -1.49028300 | 1.24491800  | -0.58674900 |
| C | -0.31786600 | 4.41497700  | 1.62589800  |
| C | -1.48170300 | 4.15963800  | 2.26714600  |
| H | 0.54153200  | 4.67347600  | 2.24213100  |
| H | -1.46895300 | 4.22979100  | 3.35366500  |
| N | -1.85263000 | 2.87254400  | -0.32174700 |
| C | -2.80249200 | 3.93344200  | 1.68107500  |
| C | -3.94460700 | 4.32721200  | 2.40435800  |
| C | -5.22363100 | 4.17767600  | 1.87777100  |
| C | -5.39263200 | 3.62192000  | 0.60690100  |
| C | -4.28021200 | 3.21181800  | -0.12662600 |
| C | -2.99680100 | 3.35073200  | 0.40826400  |

|   |             |             |             |
|---|-------------|-------------|-------------|
| H | -3.81268400 | 4.77050300  | 3.38822900  |
| H | -6.08685000 | 4.49740600  | 2.45418300  |
| H | -6.38775700 | 3.50228900  | 0.18885200  |
| H | -4.39438900 | 2.76257600  | -1.10667600 |
| C | 1.03032300  | 5.66771600  | -1.66073600 |
| C | 0.86881400  | 5.43317900  | -0.29773700 |
| C | -0.11643200 | 4.54912500  | 0.18433900  |
| C | -0.90801400 | 3.86510100  | -0.76324700 |
| C | -0.76717600 | 4.12522200  | -2.12979500 |
| C | 0.20022900  | 5.02289000  | -2.58308600 |
| H | 1.78726300  | 6.36768700  | -2.00285600 |
| H | 1.49355000  | 5.96038800  | 0.41901500  |
| H | -1.42099500 | 3.61163600  | -2.82873200 |
| H | 0.30238800  | 5.21997900  | -3.64647700 |
| C | -7.18369100 | -0.91240200 | 2.42143500  |
| H | -7.14055900 | -1.73857800 | 3.14786600  |
| H | -7.56739200 | -0.04790600 | 2.97708300  |
| C | -8.14784500 | -1.29647200 | 1.29472100  |
| H | -9.08670800 | -1.67036700 | 1.71924400  |
| H | -8.40004600 | -0.40770100 | 0.69943600  |
| C | -7.49857600 | -2.34485500 | 0.38898300  |
| H | -7.24939900 | -3.23612800 | 0.98294300  |
| H | -8.19412800 | -2.67175900 | -0.39284900 |
| C | -6.23004000 | -1.78171900 | -0.26263600 |
| H | -5.72227500 | -2.56330500 | -0.83133300 |
| H | -6.52271500 | -1.02756400 | -1.01003200 |
| C | -3.49019300 | -3.80954200 | 0.03050600  |
| H | -2.61503700 | -3.78569500 | 0.69831000  |
| H | -4.32824900 | -3.47262400 | 0.64395700  |
| C | -3.71968900 | -5.25385900 | -0.42999000 |
| H | -3.74329400 | -5.91517900 | 0.44427100  |
| H | -4.70190200 | -5.34013800 | -0.91627300 |
| C | -2.62859700 | -5.68497200 | -1.41268200 |
| H | -2.75110600 | -6.73563700 | -1.70074100 |

|   |             |             |             |
|---|-------------|-------------|-------------|
| H | -1.64649800 | -5.59845400 | -0.92582200 |
| C | -2.67263200 | -4.79546900 | -2.65915100 |
| H | -1.80755900 | -4.99277600 | -3.30462800 |
| H | -3.55711800 | -5.06673000 | -3.25564400 |
| C | 7.61320300  | 1.73666500  | -0.04570700 |
| C | 6.77665900  | 0.99326900  | -0.87329700 |
| C | 5.40225400  | 0.87802500  | -0.61315500 |
| C | 4.86579900  | 1.52486400  | 0.51523100  |
| C | 5.71501600  | 2.27940400  | 1.33612400  |
| C | 7.07540900  | 2.39228000  | 1.06436800  |
| H | 8.67214200  | 1.81576700  | -0.27299000 |
| H | 7.19371800  | 0.50604500  | -1.75301700 |
| H | 5.29537900  | 2.78313200  | 2.20496200  |
| H | 7.71343100  | 2.98591500  | 1.71300900  |
| C | 4.54598000  | 0.10838000  | -1.62563000 |
| H | 5.06160400  | 0.21820500  | -2.59587700 |
| C | 3.20052000  | 0.76449200  | -1.84332100 |
| H | 3.21551200  | 1.84143600  | -1.68778000 |
| C | 3.38353900  | 1.44882100  | 0.85278100  |
| H | 2.90633100  | 2.41622000  | 0.61746500  |
| H | 3.26406300  | 1.31461500  | 1.94132700  |
| O | 2.73909700  | 0.40691500  | 0.16841700  |
| H | 3.42364000  | -1.01651600 | 0.24793300  |
| C | 2.20394500  | 0.29367000  | -2.72309700 |
| H | 2.23171500  | -0.73730300 | -3.06772100 |
| C | 1.11340900  | 1.11831100  | -3.14626100 |
| H | 1.22606000  | 2.20236900  | -3.15870000 |
| H | 0.44237500  | 0.72588100  | -3.90601300 |

**TS-Inner-3**

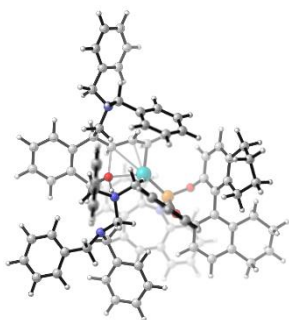

|    |            |             |             |
|----|------------|-------------|-------------|
| Pd | 0.19370000 | -0.66068000 | -1.50595400 |
| N  | 5.19766300 | -2.20514500 | -0.59771200 |
| C  | 4.70086200 | -0.82901300 | -0.45154200 |
| C  | 6.49108300 | -2.26375900 | -1.30326900 |
| C  | 6.84959600 | -3.65883200 | -1.77829600 |
| C  | 5.94944000 | -4.39356800 | -2.56416500 |
| C  | 6.29013400 | -5.66022900 | -3.03683300 |
| C  | 7.53835400 | -6.21163600 | -2.73230500 |
| C  | 8.44042200 | -5.48893600 | -1.95153900 |
| C  | 8.09497300 | -4.22081600 | -1.47656200 |
| C  | 5.32021700 | -2.87244700 | 0.71163700  |
| C  | 4.00666000 | -3.33141500 | 1.31150200  |
| C  | 3.17106000 | -4.20444200 | 0.59821200  |
| C  | 1.98352000 | -4.67174300 | 1.16081200  |
| C  | 1.61633300 | -4.28379400 | 2.45337800  |
| C  | 2.44883300 | -3.43280800 | 3.18035500  |
| C  | 3.63437800 | -2.95954000 | 2.60847300  |
| H  | 5.47827600 | -0.17536700 | -0.01395400 |
| H  | 3.86726700 | -0.84954800 | 0.25705300  |
| H  | 6.43119300 | -1.60558400 | -2.17715600 |
| H  | 7.30835600 | -1.86186200 | -0.67460200 |
| H  | 4.97862300 | -3.96481500 | -2.79915900 |
| H  | 5.58440800 | -6.21773900 | -3.64704600 |
| H  | 7.80398900 | -7.19807900 | -3.10194000 |
| H  | 9.41169000 | -5.91053500 | -1.70787100 |
| H  | 8.80208800 | -3.66190000 | -0.86732500 |
| H  | 5.95381700 | -3.75223300 | 0.55725700  |
| H  | 5.85627900 | -2.22844200 | 1.43557200  |

|   |             |             |             |
|---|-------------|-------------|-------------|
| H | 3.46850000  | -4.52273400 | -0.39745700 |
| H | 1.34537200  | -5.34528500 | 0.59534300  |
| H | 0.69356900  | -4.65216800 | 2.89259800  |
| H | 2.17747900  | -3.13571000 | 4.18955600  |
| H | 4.28720100  | -2.30883300 | 3.18666400  |
| C | -4.46733500 | -1.94431100 | 0.32719300  |
| C | -4.06076200 | -0.61059200 | 0.18774200  |
| C | -4.91887100 | 0.45497700  | 0.44517600  |
| C | -6.23315200 | 0.18360800  | 0.79539500  |
| C | -6.71967800 | -1.13028600 | 0.83765900  |
| C | -5.84430900 | -2.20199400 | 0.57899400  |
| C | -3.47792100 | -3.05250300 | 0.14438600  |
| C | -2.76729700 | -3.12990600 | -1.06093000 |
| C | -1.95771100 | -4.21926500 | -1.37213700 |
| C | -1.81557500 | -5.23450900 | -0.43523300 |
| C | -2.41641400 | -5.14717500 | 0.82859800  |
| C | -3.23354900 | -4.04107800 | 1.13489100  |
| H | -4.55671300 | 1.47085800  | 0.33612800  |
| H | -6.91389200 | 1.00767300  | 0.99595500  |
| H | -1.46650100 | -4.25961500 | -2.33882100 |
| H | -1.20836100 | -6.10463500 | -0.67507200 |
| O | -2.74377700 | -0.29746400 | -0.18280900 |
| O | -2.88425400 | -2.09552900 | -1.99113200 |
| P | -2.06014100 | -0.67714100 | -1.65420200 |
| C | -2.25516500 | 3.19658700  | -2.98937600 |
| C | -3.51179700 | 3.10903800  | -2.49556900 |
| H | -1.71944800 | 4.12845500  | -2.81672300 |
| H | -3.88836300 | 3.97370300  | -1.95225400 |
| N | -2.74003200 | 0.32319900  | -2.84080800 |
| C | -4.48818500 | 2.04366700  | -2.72087200 |
| C | -5.85660400 | 2.37317300  | -2.75003200 |
| C | -6.82757400 | 1.41459100  | -3.02078200 |
| C | -6.44855400 | 0.09252000  | -3.26755200 |
| C | -5.10157200 | -0.26496100 | -3.23021500 |

|   |             |             |             |
|---|-------------|-------------|-------------|
| C | -4.12738400 | 0.69469900  | -2.93976600 |
| H | -6.14829900 | 3.40540200  | -2.57315100 |
| H | -7.87594700 | 1.69753900  | -3.04678800 |
| H | -7.19954700 | -0.66145300 | -3.48474500 |
| H | -4.79400000 | -1.28949700 | -3.40298300 |
| C | -0.05737900 | 1.85393300  | -5.73867300 |
| C | -0.65223200 | 2.71178900  | -4.81744400 |
| C | -1.58609900 | 2.24349800  | -3.87228000 |
| C | -1.86913000 | 0.86099000  | -3.85330000 |
| C | -1.29638200 | 0.00596900  | -4.80102300 |
| C | -0.38967100 | 0.49571600  | -5.74145000 |
| H | 0.64769100  | 2.24595000  | -6.46609600 |
| H | -0.41722200 | 3.77312000  | -4.83762500 |
| H | -1.57005400 | -1.04501400 | -4.78819300 |
| H | 0.05010300  | -0.17632700 | -6.47299000 |
| C | -8.18692000 | -1.34829200 | 1.17751100  |
| H | -8.30608500 | -1.28056400 | 2.27002700  |
| H | -8.78159600 | -0.52560700 | 0.76174500  |
| C | -8.73499000 | -2.69834300 | 0.70551200  |
| H | -9.73063500 | -2.86646400 | 1.13209900  |
| H | -8.85409300 | -2.69168900 | -0.38702500 |
| C | -7.77044000 | -3.81724100 | 1.10336200  |
| H | -7.65508400 | -3.82741600 | 2.19693400  |
| H | -8.16995800 | -4.79806700 | 0.81999000  |
| C | -6.40434900 | -3.61440300 | 0.43735600  |
| H | -5.69754200 | -4.36215200 | 0.80106800  |
| H | -6.50445400 | -3.81583100 | -0.64083000 |
| C | -3.75866200 | -3.86070700 | 2.55499600  |
| H | -3.07797800 | -3.16209900 | 3.06667800  |
| H | -4.73281300 | -3.36737500 | 2.55485100  |
| C | -3.82013500 | -5.16083800 | 3.36514600  |
| H | -4.06637700 | -4.93023400 | 4.40840800  |
| H | -4.62830100 | -5.80160800 | 2.98431900  |
| C | -2.48943600 | -5.91080300 | 3.27183600  |



|   |             |             |             |
|---|-------------|-------------|-------------|
| H | -2.50084700 | -6.81361400 | 3.89336000  |
| H | -1.68589700 | -5.26821000 | 3.66037400  |
| C | -2.20056200 | -6.28658900 | 1.81489500  |
| H | -1.17785400 | -6.67108000 | 1.71316700  |
| H | -2.85985300 | -7.12024800 | 1.52858300  |
| C | 6.40543900  | 2.88527900  | -2.33716200 |
| C | 5.95129800  | 1.58313900  | -2.15114300 |
| C | 4.59524600  | 1.29567200  | -1.91797400 |
| C | 3.68145300  | 2.36304100  | -1.86568800 |
| C | 4.14769800  | 3.67211700  | -2.06491000 |
| C | 5.49253100  | 3.94150800  | -2.30147200 |
| H | 7.45984900  | 3.07278600  | -2.51842200 |
| H | 6.66569100  | 0.76388700  | -2.19749900 |
| H | 3.43246700  | 4.49171200  | -2.03136500 |
| H | 5.82802500  | 4.96367800  | -2.45407700 |
| C | 4.21005200  | -0.18215700 | -1.78054200 |
| H | 4.76199300  | -0.69014600 | -2.59058300 |
| C | 2.79403600  | -0.49596300 | -2.17110200 |
| H | 2.45283200  | 0.04785000  | -3.05120400 |
| C | 2.19638900  | 2.14894500  | -1.62070500 |
| H | 1.66307400  | 2.12631300  | -2.58790500 |
| H | 1.80345500  | 3.02944600  | -1.08805600 |
| O | 1.94602300  | 0.97867500  | -0.88151800 |
| H | 1.65354300  | 1.39248300  | 0.65937200  |
| C | 2.14978200  | -1.72634700 | -1.91863100 |
| H | 2.51113700  | -2.34917300 | -1.10781800 |
| C | 1.04468300  | -2.17607000 | -2.69577500 |
| H | 0.89741200  | -1.79877800 | -3.70758000 |
| H | 0.68039200  | -3.18582200 | -2.52874100 |
| C | 0.43956900  | 2.45871700  | 2.06201100  |
| H | 0.45729000  | 2.58655600  | 3.14596300  |
| N | 1.58905700  | 1.49153400  | 1.72916600  |
| C | 2.96813700  | 2.02583600  | 2.09173200  |
| H | 2.93472100  | 3.08311700  | 1.82201300  |

|   |             |             |             |
|---|-------------|-------------|-------------|
| C | 1.30211800  | 0.04901300  | 2.18045400  |
| H | 0.88296900  | -0.43664300 | 1.29356200  |
| H | 2.26918100  | -0.41232500 | 2.37994600  |
| H | -0.46086500 | 1.90312500  | 1.80703300  |
| N | 0.53019000  | 3.69624900  | 1.34851200  |
| C | 0.75227600  | 4.89835500  | 2.17430700  |
| H | 1.44312300  | 4.61739000  | 2.97639200  |
| H | -0.17949100 | 5.22141300  | 2.66281400  |
| C | -0.46949200 | 3.88523000  | 0.26832600  |
| H | -0.03771900 | 4.58674700  | -0.45201000 |
| H | -0.57449900 | 2.92746000  | -0.25138900 |
| C | 1.34628800  | 6.07281900  | 1.41592300  |
| C | 2.46648700  | 5.91887500  | 0.58722400  |
| C | 0.81456100  | 7.35585900  | 1.59363500  |
| C | 3.04008400  | 7.02180200  | -0.04592800 |
| H | 2.89219900  | 4.93177700  | 0.43074000  |
| C | 1.38862000  | 8.46273700  | 0.96346600  |
| H | -0.05602200 | 7.49011500  | 2.23120400  |
| C | 2.50327000  | 8.29839100  | 0.14059200  |
| H | 3.91263900  | 6.88531700  | -0.67924600 |
| H | 0.96289500  | 9.45073000  | 1.11509300  |
| H | 2.95172100  | 9.15709000  | -0.35088700 |
| C | -1.83494300 | 4.40614500  | 0.70219500  |
| C | -2.20366300 | 5.72697900  | 0.41183000  |
| C | -2.75477700 | 3.59498500  | 1.38596400  |
| C | -3.44921900 | 6.22996400  | 0.79761000  |
| H | -1.50618700 | 6.37018700  | -0.11877500 |
| C | -3.99565300 | 4.09613500  | 1.78219700  |
| C | -4.34741300 | 5.41645500  | 1.48911000  |
| H | -3.71396300 | 7.25657900  | 0.55957700  |
| H | -5.31493200 | 5.80496700  | 1.79435300  |
| H | 3.64675100  | 1.53795800  | 1.38837800  |
| C | 0.35901700  | -0.13450700 | 3.35083800  |
| C | -1.00640400 | -0.35330700 | 3.10623700  |

|   |             |             |            |
|---|-------------|-------------|------------|
| C | 0.81862600  | -0.14920300 | 4.67610900 |
| C | -1.89747300 | -0.54585300 | 4.16349700 |
| H | -1.37529000 | -0.38448700 | 2.08312700 |
| C | -0.07200500 | -0.35014300 | 5.73233800 |
| H | 1.87405300  | -0.01117700 | 4.88549900 |
| C | -1.43210000 | -0.54096800 | 5.48021500 |
| H | -2.95155700 | -0.70408200 | 3.95430800 |
| H | 0.29961500  | -0.36067400 | 6.75311100 |
| H | -2.12309100 | -0.69431800 | 6.30434800 |
| C | 3.45240600  | 1.81861200  | 3.50683400 |
| C | 3.04717800  | 2.64108100  | 4.56886700 |
| C | 4.39166500  | 0.80914800  | 3.76740700 |
| C | 3.53933200  | 2.43841600  | 5.85822300 |
| H | 2.34896400  | 3.45402000  | 4.39552500 |
| C | 4.88976500  | 0.60476400  | 5.05551800 |
| H | 4.74967500  | 0.18872100  | 2.94954200 |
| C | 4.45795500  | 1.41583000  | 6.10658200 |
| H | 3.21392600  | 3.08685600  | 6.66647000 |
| H | 5.62167400  | -0.17769000 | 5.23466500 |
| H | 4.84678000  | 1.26351700  | 7.10919100 |
| H | -2.51849700 | 2.55545500  | 1.59743400 |
| H | -4.69163000 | 3.45115900  | 2.31195000 |

**2a**

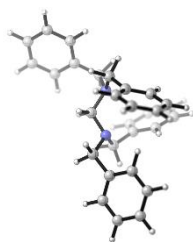

|   |             |             |             |
|---|-------------|-------------|-------------|
| C | -0.79774400 | -0.21540900 | -0.91784200 |
| H | -0.83602500 | -1.24368700 | -1.30539700 |
| N | -1.41809000 | -0.15157900 | 0.40073400  |
| C | -1.42915700 | -1.43077300 | 1.11448200  |
| H | -2.03742000 | -1.28551700 | 2.01641800  |

|   |             |             |             |
|---|-------------|-------------|-------------|
| C | -2.70019300 | 0.57002200  | 0.45558300  |
| H | -2.51888300 | 1.57996300  | 0.07334400  |
| H | -2.95778600 | 0.68104800  | 1.51589500  |
| H | -1.39321300 | 0.39768600  | -1.61451400 |
| N | 0.60862400  | 0.20981600  | -0.94676800 |
| C | 1.36876800  | -0.50023800 | -1.98714800 |
| H | 1.11734700  | -1.56397900 | -1.89379100 |
| H | 1.06906700  | -0.19528200 | -3.00935400 |
| C | 0.75677800  | 1.66473900  | -1.08544700 |
| H | 0.15146100  | 2.04125400  | -1.93473300 |
| H | 1.80408700  | 1.85307300  | -1.34731100 |
| C | 2.87136600  | -0.34468800 | -1.84702100 |
| C | 3.50503000  | -0.66155500 | -0.63614900 |
| C | 3.65465400  | 0.07770200  | -2.92690000 |
| C | 4.89016400  | -0.55798900 | -0.51471800 |
| H | 2.90316200  | -0.98697000 | 0.20685300  |
| C | 5.04358300  | 0.17935000  | -2.80825200 |
| H | 3.17327200  | 0.32919500  | -3.86982500 |
| C | 5.66497200  | -0.13814000 | -1.60044000 |
| H | 5.36771500  | -0.80907500 | 0.42914600  |
| H | 5.63600600  | 0.51047600  | -3.65739900 |
| H | 6.74465300  | -0.05833200 | -1.50350500 |
| C | 0.43199400  | 2.48011800  | 0.15183900  |
| C | -0.47222800 | 3.54544500  | 0.08831400  |
| C | 1.10187600  | 2.24077600  | 1.36033900  |
| C | -0.71628800 | 4.35023200  | 1.20622800  |
| H | -0.98656700 | 3.75423900  | -0.84797100 |
| C | 0.86245300  | 3.03998900  | 2.47630300  |
| C | -0.05056200 | 4.09809700  | 2.40458900  |
| H | -1.42430400 | 5.17220800  | 1.13623300  |
| H | -0.23529700 | 4.72133300  | 3.27570500  |
| H | -1.92865000 | -2.22414400 | 0.52807100  |
| C | -3.87984100 | -0.05047500 | -0.28777500 |
| C | -4.21588700 | 0.37214600  | -1.58231200 |

|   |             |             |             |
|---|-------------|-------------|-------------|
| C | -4.65667400 | -1.06196500 | 0.29772300  |
| C | -5.27698900 | -0.20858900 | -2.27962400 |
| H | -3.64803000 | 1.17650700  | -2.04508900 |
| C | -5.71771400 | -1.64778500 | -0.39436100 |
| H | -4.43710400 | -1.38568600 | 1.31244400  |
| C | -6.02890400 | -1.22542900 | -1.68865300 |
| H | -5.52078600 | 0.13863300  | -3.28049200 |
| H | -6.30708000 | -2.42815000 | 0.08042300  |
| H | -6.85726100 | -1.67770400 | -2.22748600 |
| C | -0.06254000 | -1.93305900 | 1.54487100  |
| C | 0.69653900  | -1.21445400 | 2.47967200  |
| C | 0.43212000  | -3.15464000 | 1.07720400  |
| C | 1.91786100  | -1.70810000 | 2.93488300  |
| H | 0.32311100  | -0.25990300 | 2.83949600  |
| C | 1.65945900  | -3.65258800 | 1.52686900  |
| H | -0.15177900 | -3.72753400 | 0.35965500  |
| C | 2.40420300  | -2.93164100 | 2.45956400  |
| H | 2.49122400  | -1.14312900 | 3.66582300  |
| H | 2.02799600  | -4.60345000 | 1.15074500  |
| H | 3.35504600  | -3.31809500 | 2.81718600  |
| H | 1.80724000  | 1.41720400  | 1.41546800  |
| H | 1.39248100  | 2.84355100  | 3.40529200  |

A-L2

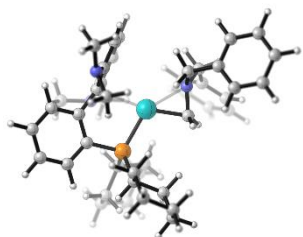

|    |             |             |             |
|----|-------------|-------------|-------------|
| Pd | -0.30180100 | -0.07558500 | -0.22307400 |
| N  | -2.50642800 | 0.25659600  | -0.17396600 |
| C  | -1.76403300 | 0.75462000  | 0.90982500  |
| C  | -3.26957700 | -1.01887100 | 0.02679800  |
| C  | -4.64904600 | -0.85006600 | 0.63231000  |

|   |             |             |             |
|---|-------------|-------------|-------------|
| C | -4.81114700 | -0.68068300 | 2.01559200  |
| C | -6.08166500 | -0.52403300 | 2.56927200  |
| C | -7.21106600 | -0.54288400 | 1.74695300  |
| C | -7.06443700 | -0.72537300 | 0.37103300  |
| C | -5.79117200 | -0.87943000 | -0.18042200 |
| C | -3.17668900 | 1.17455300  | -1.15629500 |
| C | -2.60734800 | 2.56674300  | -1.26673400 |
| C | -1.68400200 | 2.88528400  | -2.27100000 |
| C | -1.18993800 | 4.18542900  | -2.39715200 |
| C | -1.61423300 | 5.18321000  | -1.51693800 |
| C | -2.54415200 | 4.87965800  | -0.51923900 |
| C | -3.04235400 | 3.58146500  | -0.40097200 |
| H | -1.90680700 | 0.23574900  | 1.85470700  |
| H | -1.69681400 | 1.83569200  | 0.98670100  |
| H | -3.33684600 | -1.49532200 | -0.95565900 |
| H | -2.64258600 | -1.65480900 | 0.65698600  |
| H | -3.94218400 | -0.68789700 | 2.66969200  |
| H | -6.19158800 | -0.39899300 | 3.64266700  |
| H | -8.20073800 | -0.42645300 | 2.17886200  |
| H | -7.93897300 | -0.75358400 | -0.27244400 |
| H | -5.68481100 | -1.03303500 | -1.25225300 |
| H | -3.13189900 | 0.66341500  | -2.12318100 |
| H | -4.22977600 | 1.23417400  | -0.86056400 |
| H | -1.36724700 | 2.11227300  | -2.96572800 |
| H | -0.48696200 | 4.42314100  | -3.19073800 |
| H | -1.23714400 | 6.19667200  | -1.61936600 |
| H | -2.89463200 | 5.65643300  | 0.15419800  |
| H | -3.78741300 | 3.35714400  | 0.35946700  |
| C | 2.19285700  | -2.10690100 | -0.92291900 |
| C | 2.68926400  | -1.39975000 | 0.19770100  |
| C | 3.86582600  | -1.84742700 | 0.82431300  |
| C | 4.55100300  | -2.97128100 | 0.36783300  |
| C | 4.05796600  | -3.67530100 | -0.73100100 |
| C | 2.89355700  | -3.24461700 | -1.36263100 |

|   |             |             |             |
|---|-------------|-------------|-------------|
| C | 0.96084500  | -1.72181100 | -1.70968300 |
| C | -0.11434000 | -2.67944400 | -1.85453700 |
| C | -1.10825300 | -2.45314200 | -2.82736900 |
| C | -1.05286800 | -1.34735300 | -3.67049000 |
| C | -0.01494700 | -0.43030400 | -3.57168300 |
| C | 1.01725200  | -0.61813800 | -2.62955400 |
| H | 4.24722300  | -1.32475800 | 1.69540400  |
| H | 5.45587700  | -3.29784300 | 0.87188400  |
| H | 4.57652600  | -4.55693700 | -1.09654500 |
| H | 2.51151600  | -3.79664900 | -2.21560700 |
| H | -1.92528200 | -3.15596200 | -2.93311400 |
| H | -1.82280400 | -1.21133400 | -4.42581300 |
| H | 0.04359900  | 0.39212800  | -4.27431200 |
| N | -0.12703300 | -3.87252700 | -1.12047600 |
| N | 2.16941700  | 0.22570800  | -2.65590300 |
| C | -0.02664800 | -3.85642800 | 0.33556600  |
| H | -1.02593400 | -3.79737000 | 0.80108900  |
| H | 0.45740200  | -4.77492400 | 0.68487700  |
| H | 0.56003000  | -3.00940200 | 0.67707100  |
| C | -0.95078700 | -4.97579300 | -1.59828200 |
| H | -0.61891500 | -5.89121600 | -1.09895900 |
| H | -2.02512200 | -4.84753000 | -1.38019700 |
| H | -0.82341200 | -5.11072200 | -2.67504000 |
| C | 1.95193700  | 1.58482500  | -3.15059000 |
| H | 2.83882900  | 2.18239300  | -2.91657700 |
| H | 1.80246300  | 1.63908000  | -4.24263300 |
| H | 1.09258000  | 2.03627400  | -2.65022300 |
| C | 3.34254200  | -0.36711600 | -3.32127200 |
| H | 3.19403900  | -0.44940700 | -4.41094200 |
| H | 4.21125200  | 0.27357300  | -3.13937400 |
| H | 3.56062000  | -1.35604800 | -2.92175300 |
| P | 1.74284400  | 0.04310200  | 0.85790800  |
| C | 2.79388200  | 1.55926600  | 0.46255500  |
| C | 1.96724400  | 2.86598700  | 0.44702200  |

|   |             |             |             |
|---|-------------|-------------|-------------|
| C | 4.07278900  | 1.72044700  | 1.31166600  |
| H | 3.09232800  | 1.34392600  | -0.57126900 |
| C | 2.81856100  | 4.05839600  | -0.02426200 |
| H | 1.58414400  | 3.08272300  | 1.45278800  |
| H | 1.09026200  | 2.74848000  | -0.19974000 |
| C | 4.91069100  | 2.91850700  | 0.82638900  |
| H | 3.80745100  | 1.87982600  | 2.36553500  |
| H | 4.68259100  | 0.81152600  | 1.26745500  |
| C | 4.09315700  | 4.21695700  | 0.81595700  |
| H | 2.21608700  | 4.97428600  | 0.01342300  |
| H | 3.09666800  | 3.91057300  | -1.07812800 |
| H | 5.79549700  | 3.02636100  | 1.46530600  |
| H | 5.28136900  | 2.71133000  | -0.18802900 |
| H | 4.70113400  | 5.04463800  | 0.43180200  |
| H | 3.81909800  | 4.48326400  | 1.84732500  |
| C | 1.78010800  | -0.18903200 | 2.72499800  |
| C | 1.10839200  | 0.98244800  | 3.47581000  |
| C | 1.15126400  | -1.53385200 | 3.14828700  |
| H | 2.84035700  | -0.20603000 | 3.01387700  |
| C | 1.15560500  | 0.77716400  | 5.00081200  |
| H | 0.06150800  | 1.06807700  | 3.15294800  |
| H | 1.59134600  | 1.93183700  | 3.22461400  |
| C | 1.19871000  | -1.72835300 | 4.67402000  |
| H | 0.10473600  | -1.56254600 | 2.81089600  |
| H | 1.66706000  | -2.36566700 | 2.65637700  |
| C | 0.53447200  | -0.56213700 | 5.41719700  |
| H | 0.64249400  | 1.61050300  | 5.49591100  |
| H | 2.20208900  | 0.81270300  | 5.33634400  |
| H | 0.71547500  | -2.67752100 | 4.93607000  |
| H | 2.24708000  | -1.81435000 | 4.99403900  |
| H | 0.62284800  | -0.70149400 | 6.50099400  |
| H | -0.54252200 | -0.55109300 | 5.19076400  |

**E**



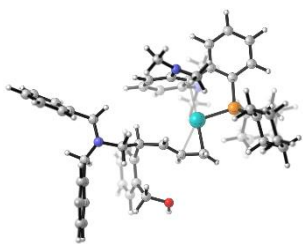

|    |             |             |             |
|----|-------------|-------------|-------------|
| Pd | 1.42225700  | -0.20533000 | 0.14144700  |
| N  | -4.64152600 | 0.39769700  | 0.36154700  |
| C  | -3.41252000 | -0.21271600 | 0.82791300  |
| C  | -4.48128400 | 1.66062200  | -0.35405200 |
| C  | -5.69139600 | 2.57442000  | -0.25529700 |
| C  | -6.22238100 | 2.91583300  | 0.99673800  |
| C  | -7.30671300 | 3.78645900  | 1.09440300  |
| C  | -7.87611900 | 4.33154000  | -0.06051600 |
| C  | -7.35595000 | 3.99756600  | -1.31094000 |
| C  | -6.27055200 | 3.12229000  | -1.40479500 |
| C  | -5.68064400 | -0.47855200 | -0.19291100 |
| C  | -6.19208900 | -1.52125900 | 0.78509100  |
| C  | -6.47765400 | -2.81945200 | 0.34359600  |
| C  | -7.01247000 | -3.77130800 | 1.21581300  |
| C  | -7.26006300 | -3.43791200 | 2.54829900  |
| C  | -6.97630100 | -2.14615900 | 2.99936100  |
| C  | -6.45035300 | -1.19545300 | 2.12414800  |
| H  | -2.94205000 | 0.49282300  | 1.52946100  |
| H  | -3.68495000 | -1.09796200 | 1.40754200  |
| H  | -4.23573900 | 1.51367200  | -1.42321500 |
| H  | -3.61549700 | 2.16724100  | 0.09465600  |
| H  | -5.78333700 | 2.48659100  | 1.89359300  |
| H  | -7.70934200 | 4.04152900  | 2.07103400  |
| H  | -8.72188900 | 5.00910000  | 0.01594700  |
| H  | -7.79658400 | 4.41129300  | -2.21388200 |
| H  | -5.87232900 | 2.85972700  | -2.38290900 |
| H  | -5.36449600 | -0.97365200 | -1.12449500 |
| H  | -6.51390900 | 0.18087100  | -0.46508000 |
| H  | -6.28747500 | -3.08352000 | -0.69427700 |

|   |             |             |             |
|---|-------------|-------------|-------------|
| H | -7.23586700 | -4.77146300 | 0.85359300  |
| H | -7.67371300 | -4.17648400 | 3.22934900  |
| H | -7.17232400 | -1.87689500 | 4.03397200  |
| H | -6.23611100 | -0.18929800 | 2.47270500  |
| C | -3.22511500 | -1.96728700 | -3.65126900 |
| C | -2.80106100 | -1.14211200 | -2.61028400 |
| C | -2.69385500 | -1.60028300 | -1.28637000 |
| C | -3.01260100 | -2.95326900 | -1.01896600 |
| C | -3.45338900 | -3.76623400 | -2.07488300 |
| C | -3.56365400 | -3.29232700 | -3.38085500 |
| H | -3.30219700 | -1.57330000 | -4.66073600 |
| H | -2.55580600 | -0.10501600 | -2.82533900 |
| H | -3.72800800 | -4.79810000 | -1.86014200 |
| H | -3.91320400 | -3.94743700 | -4.17351100 |
| C | -2.28575600 | -0.58234100 | -0.22097500 |
| H | -2.07979000 | 0.35792100  | -0.75286200 |
| C | -1.01989000 | -0.92399800 | 0.53402000  |
| H | -0.93117100 | -0.47945500 | 1.52734300  |
| C | -2.85226300 | -3.63046900 | 0.33311200  |
| H | -2.77405600 | -2.91544000 | 1.15051400  |
| H | -3.73079300 | -4.25796100 | 0.53533200  |
| O | -1.65115700 | -4.40760000 | 0.40791000  |
| H | -1.70527800 | -5.09698600 | -0.27290600 |
| C | -0.10591700 | -1.89988300 | 0.18845900  |
| H | -0.23140800 | -2.43597300 | -0.74657700 |
| C | 1.08608900  | -2.10874000 | 0.95558400  |
| H | 1.04427200  | -1.95163700 | 2.03375900  |
| H | 1.74984000  | -2.91191700 | 0.65028000  |
| C | 3.11715400  | 2.51823000  | -0.12862000 |
| C | 4.14685500  | 1.61878200  | 0.21826500  |
| C | 5.42990900  | 2.11412000  | 0.50950100  |
| C | 5.70580500  | 3.47875500  | 0.46234200  |
| C | 4.68918400  | 4.37238400  | 0.12259200  |
| C | 3.41425100  | 3.89267900  | -0.16947200 |

|   |             |             |             |
|---|-------------|-------------|-------------|
| C | 1.70099100  | 2.11908600  | -0.49641600 |
| C | 0.60956500  | 2.75894500  | 0.22780900  |
| C | -0.64968400 | 2.88433000  | -0.39500800 |
| C | -0.86658900 | 2.40109700  | -1.67830100 |
| C | 0.14407800  | 1.75811000  | -2.38657800 |
| C | 1.43268700  | 1.65243900  | -1.84191500 |
| H | 6.22318000  | 1.43239400  | 0.79777400  |
| H | 6.70259100  | 3.84023600  | 0.69696700  |
| H | 4.88657800  | 5.43979900  | 0.08433900  |
| H | 2.62734800  | 4.59281400  | -0.43403900 |
| H | -1.46382600 | 3.36662600  | 0.13032700  |
| H | -1.84231600 | 2.53646300  | -2.13714900 |
| H | -0.04390900 | 1.40805600  | -3.39417700 |
| N | 0.80376500  | 3.32091300  | 1.47550600  |
| N | 2.50982900  | 1.17757200  | -2.65627500 |
| C | 1.67734500  | 2.72118300  | 2.47835000  |
| H | 1.13724400  | 2.65552500  | 3.43103200  |
| H | 2.59374500  | 3.30220200  | 2.63797000  |
| H | 1.94834600  | 1.70745800  | 2.18245200  |
| C | -0.16113500 | 4.27453900  | 2.01062100  |
| H | 0.32156900  | 4.84110500  | 2.81137600  |
| H | -1.05819700 | 3.79038000  | 2.42823700  |
| H | -0.47070600 | 4.98466800  | 1.23981600  |
| C | 2.14214200  | 0.15210800  | -3.63538400 |
| H | 3.06004600  | -0.30177500 | -4.02270700 |
| H | 1.58328500  | 0.54627200  | -4.50055700 |
| H | 1.54489200  | -0.62753000 | -3.15587400 |
| C | 3.28205100  | 2.24675200  | -3.31309800 |
| H | 2.69486600  | 2.75148200  | -4.09841700 |
| H | 4.17001400  | 1.80540900  | -3.77724500 |
| H | 3.60983100  | 2.99122500  | -2.58877000 |
| P | 3.74395300  | -0.17478700 | 0.33304400  |
| C | 4.65069800  | -0.99449500 | -1.10530800 |
| C | 4.04851200  | -2.36444000 | -1.49385600 |

|   |            |             |             |
|---|------------|-------------|-------------|
| C | 6.18456500 | -1.08435000 | -0.95081300 |
| H | 4.42592400 | -0.29380700 | -1.91896400 |
| C | 4.71875600 | -2.93005700 | -2.75884700 |
| H | 4.17967200 | -3.08279900 | -0.67413000 |
| H | 2.96875200 | -2.26414600 | -1.65353000 |
| C | 6.83483700 | -1.65132900 | -2.22690900 |
| H | 6.44136500 | -1.73567500 | -0.10489200 |
| H | 6.60892500 | -0.09741500 | -0.73782600 |
| C | 6.24368400 | -3.01479200 | -2.60803600 |
| H | 4.29881600 | -3.91812100 | -2.98349600 |
| H | 4.47564800 | -2.28540700 | -3.61617500 |
| H | 7.91836000 | -1.72987200 | -2.07750800 |
| H | 6.68392900 | -0.94248000 | -3.05395300 |
| H | 6.69684800 | -3.37834900 | -3.53773200 |
| H | 6.49319900 | -3.75104200 | -1.83007800 |
| C | 4.59297000 | -0.73408500 | 1.91843400  |
| C | 4.51821400 | -2.25759200 | 2.16232000  |
| C | 4.08004300 | 0.03197400  | 3.15642200  |
| H | 5.65216400 | -0.47410800 | 1.77870000  |
| C | 5.29441200 | -2.65496200 | 3.43149100  |
| H | 3.46927100 | -2.55838300 | 2.27593800  |
| H | 4.91612800 | -2.81129000 | 1.30625300  |
| C | 4.85008700 | -0.37290600 | 4.42613100  |
| H | 3.01150900 | -0.18639400 | 3.29682900  |
| H | 4.17020900 | 1.11230000  | 3.00071700  |
| C | 4.79962200 | -1.88771900 | 4.66443600  |
| H | 5.20210900 | -3.73618700 | 3.58898200  |
| H | 6.36432200 | -2.45193700 | 3.27888500  |
| H | 4.43913900 | 0.16603800  | 5.28839600  |
| H | 5.89744900 | -0.05248700 | 4.32884800  |
| H | 5.39863500 | -2.15414300 | 5.54300200  |
| H | 3.76526100 | -2.18745200 | 4.88885400  |

**TS-Outer**

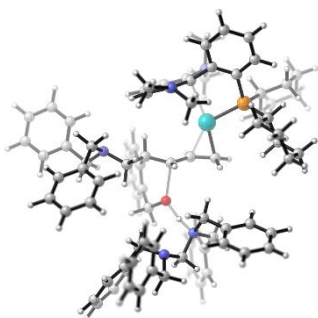

|    |             |            |             |
|----|-------------|------------|-------------|
| Pd | 2.98039200  | 0.20141500 | -0.25016200 |
| N  | -1.75238000 | 3.70963400 | 0.55047800  |
| C  | -1.56084500 | 2.28154400 | 0.27415200  |
| C  | -2.07644700 | 3.99362700 | 1.96704600  |
| C  | -3.41587600 | 3.48737300 | 2.48788200  |
| C  | -3.54464300 | 2.20693800 | 3.04567600  |
| C  | -4.77864700 | 1.74005600 | 3.50330600  |
| C  | -5.91033200 | 2.55385300 | 3.41251200  |
| C  | -5.79651500 | 3.83595300 | 2.87239300  |
| C  | -4.55953100 | 4.29731200 | 2.41814400  |
| C  | -2.67549100 | 4.36227600 | -0.38905200 |
| C  | -2.57538500 | 5.87810500 | -0.39592100 |
| C  | -3.72401600 | 6.65648100 | -0.58823300 |
| C  | -3.64279900 | 8.04884100 | -0.66329000 |
| C  | -2.40718600 | 8.68550000 | -0.53748300 |
| C  | -1.25570800 | 7.91959000 | -0.33897800 |
| C  | -1.34037200 | 6.52855100 | -0.27221800 |
| H  | -1.20775700 | 1.81949500 | 1.20279900  |
| H  | -2.49927400 | 1.77101500 | 0.01914000  |
| H  | -2.03083600 | 5.08040400 | 2.09002600  |
| H  | -1.26586300 | 3.56816200 | 2.57240100  |
| H  | -2.66510700 | 1.57306200 | 3.14135100  |
| H  | -4.85660200 | 0.74767600 | 3.93942600  |
| H  | -6.87061400 | 2.19511600 | 3.77289000  |
| H  | -6.66866700 | 4.48155900 | 2.81225300  |
| H  | -4.47526100 | 5.30361600 | 2.01474700  |
| H  | -3.72328800 | 4.06783100 | -0.20438500 |
| H  | -2.42864600 | 3.99747900 | -1.39017900 |

|   |             |             |             |
|---|-------------|-------------|-------------|
| H | -4.69086700 | 6.16684800  | -0.68508700 |
| H | -4.54555200 | 8.63492300  | -0.81349100 |
| H | -2.34178500 | 9.76878500  | -0.58944800 |
| H | -0.28983700 | 8.40803200  | -0.23676200 |
| H | -0.44949500 | 5.92895700  | -0.10873500 |
| C | -0.41242600 | 3.70255700  | -4.22011900 |
| C | -0.13126800 | 3.37991800  | -2.89085200 |
| C | -0.80101000 | 2.33690500  | -2.23867700 |
| C | -1.75300200 | 1.58394000  | -2.95000900 |
| C | -2.02425200 | 1.91056000  | -4.28296600 |
| C | -1.36709100 | 2.96532500  | -4.91945800 |
| H | 0.11132400  | 4.52299300  | -4.70255100 |
| H | 0.61196900  | 3.95342600  | -2.34355800 |
| H | -2.76373500 | 1.32849100  | -4.82911500 |
| H | -1.59527800 | 3.20365000  | -5.95462700 |
| C | -0.46357800 | 1.99675100  | -0.79079100 |
| H | 0.38227100  | 2.63283100  | -0.49846300 |
| C | 0.04223000  | 0.57418700  | -0.69799600 |
| H | -0.14347600 | 0.04705500  | 0.23321300  |
| C | -2.52634700 | 0.46534600  | -2.27527800 |
| H | -3.38336200 | 0.92373100  | -1.74683100 |
| H | -2.96183700 | -0.16475700 | -3.06592100 |
| O | -1.75492700 | -0.31513900 | -1.39066100 |
| H | -2.18979600 | -1.58450800 | -1.21230000 |
| C | 1.08160000  | 0.09558700  | -1.51812500 |
| H | 1.26607400  | 0.62478500  | -2.45020300 |
| C | 1.77568000  | -1.13403000 | -1.27893000 |
| H | 1.36023500  | -1.84110900 | -0.56026200 |
| H | 2.29453700  | -1.60973300 | -2.10895800 |
| C | 5.26429300  | 1.31009000  | 1.89731600  |
| C | 5.76221900  | 0.02231800  | 1.59854200  |
| C | 6.84642400  | -0.48265400 | 2.33915800  |
| C | 7.44311000  | 0.25953600  | 3.35524100  |
| C | 6.95323100  | 1.53193700  | 3.65179100  |

|   |            |             |             |
|---|------------|-------------|-------------|
| C | 5.87706200 | 2.04284200  | 2.93132300  |
| C | 4.12529400 | 1.99834800  | 1.17796600  |
| C | 3.00263600 | 2.47042600  | 1.95975200  |
| C | 2.16487500 | 3.46721400  | 1.43452800  |
| C | 2.39942600 | 4.01124800  | 0.17422200  |
| C | 3.45379300 | 3.56124800  | -0.60705600 |
| C | 4.34468200 | 2.58789500  | -0.11316600 |
| H | 7.22265500 | -1.47963200 | 2.13518600  |
| H | 8.27744400 | -0.15512400 | 3.91365500  |
| H | 7.40438600 | 2.12455600  | 4.44256300  |
| H | 5.49529500 | 3.03076600  | 3.16857600  |
| H | 1.31743700 | 3.82254400  | 2.00659000  |
| H | 1.74885500 | 4.79913400  | -0.19490500 |
| H | 3.63542400 | 4.01014200  | -1.57627200 |
| N | 2.81678000 | 2.02312700  | 3.27910800  |
| N | 5.53845600 | 2.28207600  | -0.84438900 |
| C | 2.68956300 | 0.59229000  | 3.53264600  |
| H | 3.34925400 | 0.02467200  | 2.88325500  |
| H | 1.65479100 | 0.24380700  | 3.36346000  |
| H | 2.95935300 | 0.37720100  | 4.57228800  |
| C | 1.96560900 | 2.81072500  | 4.15934200  |
| H | 2.13992400 | 2.48335800  | 5.18905200  |
| H | 0.88746200 | 2.69382200  | 3.94911900  |
| H | 2.22160700 | 3.87089600  | 4.09055000  |
| C | 5.41770500 | 2.37068200  | -2.29966000 |
| H | 6.29447500 | 1.89421300  | -2.75045700 |
| H | 5.37810900 | 3.40592400  | -2.67963300 |
| H | 4.52362600 | 1.83803400  | -2.63367600 |
| C | 6.72343900 | 3.02614600  | -0.38853100 |
| H | 6.65178800 | 4.10084300  | -0.62830600 |
| H | 7.60911000 | 2.62076000  | -0.88900700 |
| H | 6.85995800 | 2.91611600  | 0.68687900  |
| P | 4.93264200 | -0.97695600 | 0.28550300  |
| C | 6.20459500 | -1.07913300 | -1.11300800 |

|   |             |             |             |
|---|-------------|-------------|-------------|
| C | 5.55730400  | -1.40230100 | -2.47932500 |
| C | 7.42471800  | -1.98807400 | -0.85475100 |
| H | 6.55267400  | -0.03919000 | -1.15373900 |
| C | 6.58453900  | -1.31963600 | -3.62238700 |
| H | 5.12809500  | -2.41320000 | -2.46421500 |
| H | 4.72589600  | -0.71373500 | -2.66776100 |
| C | 8.44353700  | -1.89072900 | -2.00597000 |
| H | 7.10208800  | -3.03380600 | -0.75847900 |
| H | 7.91666000  | -1.71597100 | 0.08497700  |
| C | 7.80231300  | -2.21652600 | -3.36115700 |
| H | 6.10270000  | -1.59192700 | -4.56980600 |
| H | 6.92080100  | -0.27814100 | -3.73180100 |
| H | 9.28495700  | -2.56573000 | -1.80687200 |
| H | 8.85938100  | -0.87303300 | -2.03369000 |
| H | 8.53760400  | -2.10342300 | -4.16684900 |
| H | 7.48761200  | -3.27056800 | -3.37101800 |
| C | 4.83868800  | -2.70350200 | 1.03697300  |
| C | 4.25246100  | -3.74480500 | 0.05922200  |
| C | 4.05065000  | -2.71773300 | 2.36365900  |
| H | 5.87339000  | -3.00140300 | 1.25790600  |
| C | 4.22689300  | -5.15063400 | 0.68617200  |
| H | 3.23038100  | -3.44699700 | -0.21242700 |
| H | 4.82877000  | -3.77459400 | -0.87100400 |
| C | 4.02398000  | -4.12356500 | 2.98878400  |
| H | 3.02039500  | -2.38335700 | 2.17312500  |
| H | 4.48987500  | -2.01007600 | 3.07480500  |
| C | 3.46290200  | -5.16989200 | 2.01685300  |
| H | 3.78201500  | -5.85984400 | -0.02351100 |
| H | 5.26006900  | -5.48792400 | 0.85364300  |
| H | 3.43265400  | -4.10283700 | 3.91258700  |
| H | 5.04586600  | -4.40706300 | 3.27983200  |
| H | 3.50946000  | -6.16921600 | 2.46660800  |
| H | 2.39937200  | -4.96147400 | 1.82987900  |
| C | -3.86346600 | -3.06411000 | -0.80819700 |



|   |             |             |             |
|---|-------------|-------------|-------------|
| H | -3.93199400 | -4.15109500 | -0.70639800 |
| N | -2.39144300 | -2.73868400 | -0.98956500 |
| C | -1.57524200 | -2.97175600 | 0.26481100  |
| H | -2.06739300 | -2.37797800 | 1.03498900  |
| C | -1.81264500 | -3.50860200 | -2.15434100 |
| H | -0.75103800 | -3.24715400 | -2.17128100 |
| H | -1.89154700 | -4.57286600 | -1.91527000 |
| H | -4.34333600 | -2.78190100 | -1.75125200 |
| N | -4.44490200 | -2.44197700 | 0.35453200  |
| C | -5.44423900 | -3.28568100 | 1.03010200  |
| H | -5.05959500 | -4.31319200 | 1.01627500  |
| H | -6.39935100 | -3.30727400 | 0.48259100  |
| C | -4.87478100 | -1.03079500 | 0.15852900  |
| H | -5.01106100 | -0.59918100 | 1.15439300  |
| H | -4.02849700 | -0.50814300 | -0.29337200 |
| C | -5.71689500 | -2.89770600 | 2.47502300  |
| C | -4.71298600 | -2.40158200 | 3.31725800  |
| C | -6.99393300 | -3.11168400 | 3.01109200  |
| C | -4.97616100 | -2.13832300 | 4.66377800  |
| H | -3.72431900 | -2.20954800 | 2.91098000  |
| C | -7.26008000 | -2.85162200 | 4.35653400  |
| H | -7.78661200 | -3.48908200 | 2.36880600  |
| C | -6.25040600 | -2.36443600 | 5.18878500  |
| H | -4.18390900 | -1.75873600 | 5.30399000  |
| H | -8.25665400 | -3.02594100 | 4.75262000  |
| H | -6.45512400 | -2.15993400 | 6.23580800  |
| C | -6.14421300 | -0.82737500 | -0.65535600 |
| C | -7.38497700 | -0.72350900 | -0.00745200 |
| C | -6.11973700 | -0.74406400 | -2.05651200 |
| C | -8.56500700 | -0.55930100 | -0.73437200 |
| H | -7.42330700 | -0.76175400 | 1.07844400  |
| C | -7.29847600 | -0.58221400 | -2.78763000 |
| C | -8.52546200 | -0.49267900 | -2.12853100 |
| H | -9.51405200 | -0.47598100 | -0.21163800 |

|   |             |             |             |
|---|-------------|-------------|-------------|
| H | -9.44252400 | -0.36103800 | -2.69596800 |
| H | -0.60314200 | -2.52108600 | 0.05019500  |
| C | -2.42054200 | -3.23315800 | -3.51176700 |
| C | -1.92768900 | -2.18995600 | -4.30877000 |
| C | -3.41762800 | -4.06977900 | -4.03433000 |
| C | -2.43366300 | -1.97763000 | -5.59216700 |
| H | -1.14563800 | -1.54431200 | -3.91845100 |
| C | -3.92887800 | -3.85533800 | -5.31495300 |
| H | -3.78768900 | -4.90364500 | -3.44198200 |
| C | -3.43772300 | -2.80733900 | -6.09630600 |
| H | -2.03603000 | -1.16965900 | -6.19986800 |
| H | -4.70008000 | -4.51300500 | -5.70545200 |
| H | -3.82750700 | -2.64554900 | -7.09725500 |
| C | -1.40567900 | -4.40772500 | 0.71608000  |
| C | -2.25208500 | -4.95862200 | 1.68977800  |
| C | -0.36587500 | -5.20510200 | 0.21000100  |
| C | -2.08420400 | -6.27543900 | 2.12299000  |
| H | -3.03198100 | -4.34735700 | 2.13219100  |
| C | -0.19812200 | -6.52282500 | 0.63788700  |
| H | 0.32466000  | -4.79166000 | -0.52128600 |
| C | -1.06207100 | -7.06376100 | 1.59262300  |
| H | -2.74809400 | -6.68041500 | 2.88147400  |
| H | 0.61022000  | -7.12355000 | 0.23062800  |
| H | -0.93101400 | -8.08815300 | 1.92910100  |
| H | -5.17165200 | -0.78131000 | -2.58586400 |
| H | -7.25563900 | -0.51491200 | -3.87138800 |

**1a'**

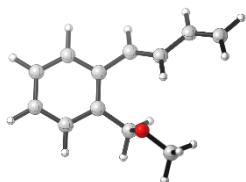

|   |             |             |             |
|---|-------------|-------------|-------------|
| C | -3.18209100 | -1.33385100 | -0.30058500 |
| C | -1.87732100 | -1.78283700 | -0.12681600 |

|   |             |             |             |
|---|-------------|-------------|-------------|
| C | -0.81034900 | -0.89812600 | 0.13210700  |
| C | -1.10678900 | 0.48256500  | 0.27143500  |
| C | -2.42709200 | 0.91533000  | 0.09761700  |
| C | -3.46202200 | 0.02956800  | -0.19656000 |
| H | -3.97664300 | -2.04459700 | -0.51186000 |
| H | -1.66126400 | -2.84548600 | -0.20883100 |
| H | -2.64445000 | 1.97524200  | 0.20809100  |
| H | -4.47606400 | 0.39739800  | -0.32631000 |
| C | 0.52590700  | -1.49585600 | 0.26233900  |
| H | 0.52294800  | -2.53377900 | 0.60029500  |
| C | 1.72139900  | -0.94775700 | -0.04976800 |
| H | 1.76214600  | 0.05677500  | -0.46492800 |
| C | -0.07480900 | 1.51266500  | 0.66134000  |
| H | 0.65309600  | 1.08488200  | 1.36796900  |
| H | -0.57418400 | 2.35405900  | 1.16817300  |
| O | 0.60245500  | 2.00191500  | -0.49501000 |
| C | 2.97967600  | -1.65917000 | 0.09772800  |
| H | 2.92245400  | -2.67172800 | 0.49959800  |
| C | 4.17966000  | -1.15010400 | -0.22574300 |
| H | 4.28048800  | -0.14538100 | -0.63010500 |
| H | 5.09552700  | -1.71959000 | -0.09963800 |
| C | 1.52549600  | 3.02370600  | -0.17731200 |
| H | 1.98500000  | 3.34572500  | -1.11545200 |
| H | 1.02749800  | 3.88717900  | 0.29273600  |
| H | 2.31382300  | 2.66718700  | 0.50564600  |

**B'-L4**

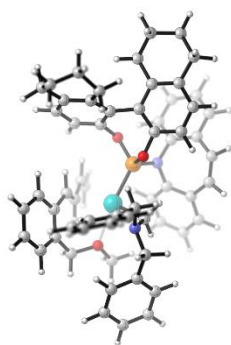

|    |             |             |             |
|----|-------------|-------------|-------------|
| Pd | 1.49115400  | -0.53393900 | 0.75964600  |
| N  | 2.37255900  | 0.23358000  | -1.89182000 |
| C  | 1.81985300  | -0.91067100 | -1.29454400 |
| C  | 3.51705200  | 0.00940800  | -2.81385100 |
| C  | 4.81209500  | -0.47711900 | -2.20170900 |
| C  | 5.63911400  | 0.41076500  | -1.49685300 |
| C  | 6.88958700  | 0.00155100  | -1.03412500 |
| C  | 7.33266000  | -1.30628400 | -1.26528000 |
| C  | 6.51627400  | -2.19868700 | -1.96094300 |
| C  | 5.26537800  | -1.78230400 | -2.42748600 |
| C  | 1.37349200  | 1.17019200  | -2.44803300 |
| C  | 1.91596600  | 2.55607800  | -2.72980200 |
| C  | 1.80000900  | 3.11680400  | -4.00739700 |
| C  | 2.26465300  | 4.40866100  | -4.26686300 |
| C  | 2.85910200  | 5.15331600  | -3.24805000 |
| C  | 2.98232900  | 4.60097100  | -1.96987000 |
| C  | 2.51237100  | 3.31362000  | -1.71103800 |
| H  | 2.54199600  | -1.72728600 | -1.23302000 |
| H  | 0.87762900  | -1.23630100 | -1.74083800 |
| H  | 3.20682100  | -0.68829500 | -3.60901900 |
| H  | 3.70261300  | 0.97344300  | -3.29359000 |
| H  | 5.30333900  | 1.43212000  | -1.33474000 |
| H  | 7.53396900  | 0.70764700  | -0.51617700 |
| H  | 8.31442900  | -1.61867500 | -0.92030000 |
| H  | 6.85770100  | -3.21114100 | -2.15813900 |
| H  | 4.64821300  | -2.47172500 | -2.99987100 |
| H  | 0.94288000  | 0.75095300  | -3.37401100 |
| H  | 0.55963300  | 1.22753200  | -1.72109200 |
| H  | 1.34075500  | 2.53901200  | -4.80654900 |
| H  | 2.16605500  | 4.82803600  | -5.26421400 |
| H  | 3.22454200  | 6.15687600  | -3.44713800 |
| H  | 3.44186200  | 5.17596100  | -1.17060600 |
| H  | 2.60918700  | 2.89076600  | -0.71513000 |
| C  | -3.50177700 | 0.60634300  | -0.50868300 |

|   |             |             |             |
|---|-------------|-------------|-------------|
| C | -2.57113500 | -0.08956000 | -1.28423400 |
| C | -2.90748900 | -0.69401300 | -2.49042300 |
| C | -4.23655100 | -0.67416900 | -2.88921900 |
| C | -5.23323900 | -0.11523500 | -2.07636400 |
| C | -4.87401500 | 0.51567000  | -0.86967500 |
| C | -3.03357900 | 1.41328700  | 0.66094500  |
| C | -2.30667700 | 0.80554900  | 1.69248600  |
| C | -2.03673600 | 1.46834700  | 2.88832000  |
| C | -2.40796200 | 2.79972600  | 3.01878000  |
| C | -2.99609500 | 3.49550000  | 1.95360400  |
| C | -3.30092600 | 2.80799500  | 0.76271700  |
| H | -2.13923800 | -1.18299300 | -3.07819800 |
| H | -4.51969800 | -1.13583200 | -3.83226200 |
| H | -1.56209700 | 0.93524200  | 3.70455500  |
| H | -2.21637100 | 3.31999500  | 3.95433700  |
| O | -1.23180400 | -0.15280200 | -0.86981100 |
| O | -1.87236500 | -0.52354100 | 1.57911800  |
| P | -0.72834900 | -0.97591900 | 0.47215000  |
| C | -0.78293800 | -4.08581000 | -2.11919300 |
| C | -2.11873900 | -3.88898200 | -2.03648700 |
| H | -0.36981200 | -4.29769300 | -3.10375800 |
| H | -2.68604700 | -3.95185300 | -2.96312700 |
| N | -1.09936800 | -2.62274400 | 0.40032900  |
| C | -2.92630100 | -3.74279600 | -0.82676600 |
| C | -4.25064000 | -4.22116800 | -0.83561500 |
| C | -5.04272700 | -4.18416700 | 0.30648700  |
| C | -4.52461000 | -3.66106800 | 1.49446200  |
| C | -3.22364600 | -3.16218200 | 1.52474100  |
| C | -2.43576900 | -3.17788100 | 0.37040300  |
| H | -4.64534000 | -4.64553300 | -1.75508600 |
| H | -6.05746700 | -4.56986200 | 0.27487200  |
| H | -5.13232200 | -3.63624400 | 2.39418500  |
| H | -2.81577300 | -2.73933100 | 2.43505100  |
| C | 2.09681700  | -5.37143400 | -0.06866200 |

|   |             |             |             |
|---|-------------|-------------|-------------|
| C | 1.24841200  | -5.10070000 | -1.13805500 |
| C | 0.14964600  | -4.22881100 | -1.00256300 |
| C | -0.03430700 | -3.58594400 | 0.24095500  |
| C | 0.80280700  | -3.87806300 | 1.32256000  |
| C | 1.86454200  | -4.77076200 | 1.17239200  |
| H | 2.92180200  | -6.06665800 | -0.19517000 |
| H | 1.40694000  | -5.59513900 | -2.09302600 |
| H | 0.61388500  | -3.40116300 | 2.27845100  |
| H | 2.50416500  | -4.99724500 | 2.02072900  |
| C | -6.67780100 | -0.18575200 | -2.54916800 |
| H | -6.83536000 | 0.60159500  | -3.30211300 |
| H | -6.84246900 | -1.13542300 | -3.07271500 |
| C | -7.70306700 | -0.00794700 | -1.42508200 |
| H | -8.70574700 | 0.10922900  | -1.85166100 |
| H | -7.72754200 | -0.90911900 | -0.79657900 |
| C | -7.32788300 | 1.20058800  | -0.56489700 |
| H | -7.30639300 | 2.10296500  | -1.19266800 |
| H | -8.07989800 | 1.37630200  | 0.21302900  |
| C | -5.95848100 | 0.98966200  | 0.09177900  |
| H | -5.65173000 | 1.89489200  | 0.61990800  |
| H | -6.05538700 | 0.21865700  | 0.87220600  |
| C | -3.81315200 | 3.58401400  | -0.44673300 |
| H | -2.95200800 | 3.74676300  | -1.11375300 |
| H | -4.51698100 | 2.98752800  | -1.02956800 |
| C | -4.43244400 | 4.94378700  | -0.10269500 |
| H | -4.62184300 | 5.49946200  | -1.02825800 |
| H | -5.40786700 | 4.79784700  | 0.38307100  |
| C | -3.51305200 | 5.73381300  | 0.83067100  |
| H | -3.92227900 | 6.72941600  | 1.03623700  |
| H | -2.53984000 | 5.88428000  | 0.34264600  |
| C | -3.32564600 | 4.96874600  | 2.14418900  |
| H | -2.54665200 | 5.43917200  | 2.75674300  |
| H | -4.25244000 | 5.04152700  | 2.73343900  |
| C | 2.77829500  | 4.24969000  | 2.07209500  |

|   |             |             |            |
|---|-------------|-------------|------------|
| C | 1.98232000  | 3.15422200  | 2.39387300 |
| C | 2.49503400  | 1.84061000  | 2.42175100 |
| C | 3.84879400  | 1.64314400  | 2.04034000 |
| C | 4.62895600  | 2.75423700  | 1.70428900 |
| C | 4.11697000  | 4.05233400  | 1.73613900 |
| H | 2.35398100  | 5.24916100  | 2.08486000 |
| H | 0.93915500  | 3.31050800  | 2.65558500 |
| H | 5.66492800  | 2.59794000  | 1.41523600 |
| H | 4.75591900  | 4.89451000  | 1.48784400 |
| C | 1.54991100  | 0.80662900  | 2.88428200 |
| H | 0.52989200  | 1.17471100  | 2.95975000 |
| C | 1.78588900  | -0.42644100 | 3.43347600 |
| H | 2.79266800  | -0.82496900 | 3.49553600 |
| C | 4.51423900  | 0.29334100  | 2.00115400 |
| H | 4.62136200  | -0.12867900 | 3.01282700 |
| H | 5.52122100  | 0.38731100  | 1.58038000 |
| O | 3.78437600  | -0.64410700 | 1.18701000 |
| C | 0.76819800  | -1.21348200 | 4.11343800 |
| H | -0.25993100 | -0.86451800 | 4.04240200 |
| C | 1.04339300  | -2.30955700 | 4.84096800 |
| H | 2.05855300  | -2.68620400 | 4.94625100 |
| H | 0.26633400  | -2.85048600 | 5.37164600 |
| C | 4.40233800  | -1.93755600 | 1.20479700 |
| H | 4.41517600  | -2.34101100 | 2.22716500 |
| H | 3.80997400  | -2.59181000 | 0.56726100 |
| H | 5.42443000  | -1.86877700 | 0.81972500 |

MeOH

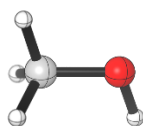

|   |            |             |             |
|---|------------|-------------|-------------|
| C | 0.66185300 | -0.01965700 | 0.00000000  |
| H | 1.07971300 | 0.99082700  | -0.00000100 |
| H | 1.03693000 | -0.54374100 | -0.89317500 |
| H | 1.03693000 | -0.54373900 | 0.89317600  |

|   |             |             |            |
|---|-------------|-------------|------------|
| O | -0.74857800 | 0.12248600  | 0.00000000 |
| H | -1.13606200 | -0.76529200 | 0.00000000 |

**G**

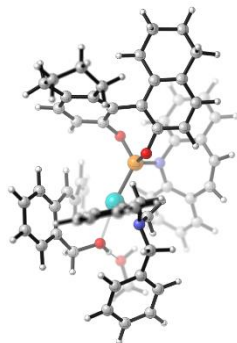

|    |             |             |             |
|----|-------------|-------------|-------------|
| Pd | -1.44551800 | -0.33309700 | -0.69616500 |
| N  | -2.15820100 | 0.51669600  | 2.00279600  |
| C  | -1.76311900 | -0.67468900 | 1.37378800  |
| C  | -3.28371700 | 0.41491900  | 2.96558200  |
| C  | -4.64105700 | 0.06726600  | 2.39542600  |
| C  | -5.39979600 | 1.04215400  | 1.73123000  |
| C  | -6.69171100 | 0.75934300  | 1.28952800  |
| C  | -7.24675100 | -0.50719400 | 1.50334600  |
| C  | -6.50203600 | -1.48398200 | 2.16523400  |
| C  | -5.20766900 | -1.19446300 | 2.60921800  |
| C  | -1.04865500 | 1.34615300  | 2.50926600  |
| C  | -1.43276600 | 2.78809300  | 2.77321800  |
| C  | -1.20236800 | 3.36705700  | 4.02670800  |
| C  | -1.52061200 | 4.70644800  | 4.26596700  |
| C  | -2.08150100 | 5.48170100  | 3.25098400  |
| C  | -2.31846000 | 4.91175100  | 1.99665900  |
| C  | -1.99481400 | 3.57634100  | 1.75786200  |
| H  | -2.58036500 | -1.39735700 | 1.33211300  |
| H  | -0.85215700 | -1.11707500 | 1.78506000  |
| H  | -3.02311200 | -0.31237500 | 3.75289900  |
| H  | -3.35016400 | 1.39302000  | 3.44856200  |
| H  | -4.97410700 | 2.03086300  | 1.57850500  |
| H  | -7.27923800 | 1.53254900  | 0.80068500  |



|   |             |             |             |
|---|-------------|-------------|-------------|
| H | -8.26075400 | -0.72075500 | 1.17635200  |
| H | -6.93516400 | -2.46151800 | 2.36079100  |
| H | -4.64434500 | -1.94847300 | 3.15540200  |
| H | -0.63325600 | 0.90323600  | 3.43177700  |
| H | -0.25762400 | 1.30383500  | 1.75680100  |
| H | -0.76922900 | 2.76573100  | 4.82314100  |
| H | -1.33508500 | 5.13919700  | 5.24512300  |
| H | -2.33346800 | 6.52246400  | 3.43469000  |
| H | -2.75278000 | 5.50938800  | 1.19991300  |
| H | -2.18123700 | 3.13879600  | 0.78102500  |
| C | 3.64634000  | 0.37441900  | 0.42642300  |
| C | 2.68490600  | -0.23466000 | 1.23633100  |
| C | 3.00207900  | -0.83364400 | 2.45061500  |
| C | 4.33629700  | -0.89832300 | 2.82544200  |
| C | 5.35355400  | -0.42864000 | 1.98206400  |
| C | 5.01592100  | 0.19621300  | 0.76623100  |
| C | 3.21580900  | 1.17800000  | -0.75987100 |
| C | 2.42867000  | 0.59301100  | -1.76022800 |
| C | 2.19431900  | 1.23247700  | -2.97588000 |
| C | 2.66509900  | 2.52588200  | -3.15794000 |
| C | 3.31716600  | 3.21166300  | -2.12384500 |
| C | 3.58491400  | 2.54448000  | -0.91274300 |
| H | 2.21191700  | -1.25074300 | 3.06484600  |
| H | 4.60474100  | -1.35730000 | 3.77403200  |
| H | 1.66720800  | 0.70951900  | -3.76604600 |
| H | 2.50152300  | 3.02651200  | -4.10941400 |
| O | 1.33522600  | -0.20720900 | 0.85524800  |
| O | 1.89251000  | -0.69259300 | -1.59110900 |
| P | 0.72209500  | -0.99740000 | -0.45759100 |
| C | 0.28862500  | -4.05003700 | 2.16325200  |
| C | 1.63870000  | -3.96665700 | 2.19015800  |
| H | -0.22463400 | -4.19695000 | 3.11168200  |
| H | 2.11989800  | -4.04794300 | 3.16319700  |
| N | 0.93616600  | -2.67126700 | -0.33081400 |

|   |             |             |             |
|---|-------------|-------------|-------------|
| C | 2.55086200  | -3.92550700 | 1.04813600  |
| C | 3.81864500  | -4.52507100 | 1.17081800  |
| C | 4.69942800  | -4.58165800 | 0.09642300  |
| C | 4.33093900  | -4.03043800 | -1.13392800 |
| C | 3.08924200  | -3.41340400 | -1.27654600 |
| C | 2.21181700  | -3.33977900 | -0.19110300 |
| H | 4.09711000  | -4.96743700 | 2.12376000  |
| H | 5.66732000  | -5.05993600 | 0.21395900  |
| H | 5.00961000  | -4.07633700 | -1.98053700 |
| H | 2.79834700  | -2.96848400 | -2.22049500 |
| C | -2.44368600 | -5.22894600 | -0.13828500 |
| C | -1.69796500 | -4.96972000 | 1.00843400  |
| C | -0.54580400 | -4.16004300 | 0.96726900  |
| C | -0.20633400 | -3.54933000 | -0.26068900 |
| C | -0.94736200 | -3.81939600 | -1.41465800 |
| C | -2.05812900 | -4.66550100 | -1.36138200 |
| H | -3.30143300 | -5.89386400 | -0.08602400 |
| H | -1.97582100 | -5.43558500 | 1.95024700  |
| H | -0.64788100 | -3.36649600 | -2.35338300 |
| H | -2.59995200 | -4.90049200 | -2.27417100 |
| C | 6.79828300  | -0.58772000 | 2.43258100  |
| H | 7.02284800  | 0.20400600  | 3.16362700  |
| H | 6.90682500  | -1.53419700 | 2.97623000  |
| C | 7.81344400  | -0.50677600 | 1.28832900  |
| H | 8.82903500  | -0.44714400 | 1.69591000  |
| H | 7.76676900  | -1.42256100 | 0.68255800  |
| C | 7.50499300  | 0.70283600  | 0.40363600  |
| H | 7.55526800  | 1.61978100  | 1.00820300  |
| H | 8.25309800  | 0.80818600  | -0.39063000 |
| C | 6.11303300  | 0.56889100  | -0.22512300 |
| H | 5.85976700  | 1.47844700  | -0.77344200 |
| H | 6.14386800  | -0.22731200 | -0.98549900 |
| C | 4.16755000  | 3.32063600  | 0.26434400  |
| H | 3.32846500  | 3.56917200  | 0.93298500  |

|   |             |             |             |
|---|-------------|-------------|-------------|
| H | 4.83211500  | 2.69352100  | 0.86108200  |
| C | 4.88100100  | 4.61859400  | -0.13205200 |
| H | 5.12086700  | 5.19004000  | 0.77196700  |
| H | 5.83768100  | 4.38504800  | -0.62095100 |
| C | 4.01137200  | 5.44188800  | -1.08425900 |
| H | 4.48990500  | 6.39727100  | -1.32765000 |
| H | 3.05721900  | 5.67955500  | -0.59332400 |
| C | 3.75380800  | 4.64857500  | -2.36884000 |
| H | 3.00569500  | 5.15481400  | -2.99123600 |
| H | 4.67731300  | 4.63163000  | -2.96748800 |
| C | -2.23621000 | 4.60229900  | -2.14208000 |
| C | -1.58073900 | 3.41366500  | -2.45096700 |
| C | -2.23057000 | 2.16415600  | -2.38333100 |
| C | -3.57248700 | 2.13099300  | -1.92024000 |
| C | -4.21095700 | 3.33358300  | -1.60363000 |
| C | -3.56692800 | 4.56616000  | -1.72807200 |
| H | -1.70996000 | 5.54846700  | -2.22618900 |
| H | -0.54446500 | 3.44451700  | -2.77712900 |
| H | -5.23795600 | 3.30210700  | -1.24909100 |
| H | -4.09740100 | 5.48318600  | -1.48915700 |
| C | -1.43312900 | 1.01444200  | -2.84898200 |
| H | -0.38295300 | 1.26019800  | -2.98667600 |
| C | -1.83385400 | -0.20084000 | -3.34024300 |
| H | -2.87887200 | -0.49128200 | -3.33318000 |
| C | -4.34988200 | 0.85309700  | -1.74259400 |
| H | -4.54464100 | 0.36768500  | -2.70860700 |
| H | -5.31958000 | 1.07527300  | -1.28680800 |
| O | -3.65613500 | -0.06402300 | -0.87309100 |
| H | -4.05673400 | -0.96666300 | -0.98830500 |
| C | -0.94960000 | -1.10184700 | -4.06512800 |
| H | 0.11175300  | -0.86108200 | -4.06810800 |
| C | -1.38501500 | -2.16837800 | -4.75749500 |
| H | -2.43902300 | -2.43546800 | -4.78977600 |
| H | -0.70506500 | -2.79005900 | -5.33168800 |

|   |             |             |             |
|---|-------------|-------------|-------------|
| C | -5.73126200 | -3.17415700 | -1.16569900 |
| H | -6.51984000 | -2.47848200 | -1.45722800 |
| H | -5.82704700 | -3.38593200 | -0.09520900 |
| H | -5.84560800 | -4.10034100 | -1.74110700 |
| O | -4.48375400 | -2.53711000 | -1.46975000 |
| H | -3.75258100 | -3.13374400 | -1.22741500 |

**TBuOH**

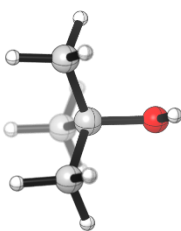

|   |             |             |             |
|---|-------------|-------------|-------------|
| C | 0.00531700  | -0.00000600 | 0.01473700  |
| O | -0.01381800 | -0.00002000 | 1.45177200  |
| H | -0.94388100 | 0.00069800  | 1.72994000  |
| C | 1.49042800  | -0.00127900 | -0.35706500 |
| H | 1.98341600  | -0.88816300 | 0.05467500  |
| H | 1.62191300  | -0.00144400 | -1.44449000 |
| H | 1.98491800  | 0.88481000  | 0.05459600  |
| C | -0.69162300 | -1.26492200 | -0.51012600 |
| H | -1.74907100 | -1.27793500 | -0.21345000 |
| H | -0.65482800 | -1.32134000 | -1.60439700 |
| H | -0.21237500 | -2.15967800 | -0.09915200 |
| C | -0.68940000 | 1.26614200  | -0.51006800 |
| H | -0.20860600 | 2.16001700  | -0.09898100 |
| H | -0.65242700 | 1.32259700  | -1.60433000 |
| H | -1.74684600 | 1.28098600  | -0.21345900 |

**G'**

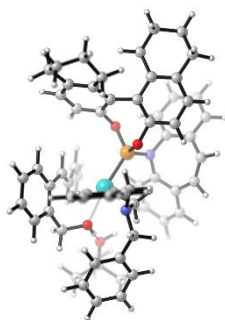

|    |             |             |             |
|----|-------------|-------------|-------------|
| Pd | -1.24834500 | -0.11746600 | -0.50901300 |
| N  | -1.66131700 | 1.01751700  | 2.15969800  |
| C  | -1.49019600 | -0.25660600 | 1.59251700  |
| C  | -2.73923600 | 1.14487900  | 3.17242400  |
| C  | -4.16556800 | 1.11880000  | 2.66742200  |
| C  | -4.69427300 | 2.22486000  | 1.98557100  |
| C  | -6.03905500 | 2.25719500  | 1.61872600  |
| C  | -6.87916100 | 1.18107200  | 1.92708000  |
| C  | -6.36349300 | 0.07678300  | 2.60669300  |
| C  | -5.01410000 | 0.04954300  | 2.97417900  |
| C  | -0.41091700 | 1.68642800  | 2.56716800  |
| C  | -0.54893200 | 3.18453500  | 2.74663400  |
| C  | -0.19387900 | 3.79298000  | 3.95626800  |
| C  | -0.28479000 | 5.17843600  | 4.11474100  |
| C  | -0.73940700 | 5.97209300  | 3.06166900  |
| C  | -1.09880500 | 5.37377000  | 1.85026600  |
| C  | -1.00276700 | 3.99139700  | 1.69231200  |
| H  | -2.41088800 | -0.84236100 | 1.63573700  |
| H  | -0.63793200 | -0.81257700 | 1.99276100  |
| H  | -2.61121600 | 0.36688200  | 3.94284700  |
| H  | -2.56919200 | 2.10622600  | 3.66428500  |
| H  | -4.04615900 | 3.06856000  | 1.76196300  |
| H  | -6.44318400 | 3.13265600  | 1.11626700  |
| H  | -7.93196000 | 1.21641100  | 1.66053800  |
| H  | -7.01393300 | -0.75154600 | 2.87464700  |
| H  | -4.62544600 | -0.79949600 | 3.53282400  |
| H  | -0.02742000 | 1.23937600  | 3.50141700  |
| H  | 0.32607200  | 1.47229100  | 1.79053000  |

|   |             |             |             |
|---|-------------|-------------|-------------|
| H | 0.15881500  | 3.17836500  | 4.78175100  |
| H | -0.00510300 | 5.63346400  | 5.06087100  |
| H | -0.81400700 | 7.04925500  | 3.18238100  |
| H | -1.45081500 | 5.98542200  | 1.02404400  |
| H | -1.28304800 | 3.53198000  | 0.74839500  |
| C | 3.96297400  | 0.04062500  | 0.25143600  |
| C | 2.98913800  | -0.35640100 | 1.17070200  |
| C | 3.30871500  | -0.87198100 | 2.42204000  |
| C | 4.64622600  | -1.07512700 | 2.72937900  |
| C | 5.65559300  | -0.82796400 | 1.78767000  |
| C | 5.31870500  | -0.28431500 | 0.53327300  |
| C | 3.55910500  | 0.77821700  | -0.98610600 |
| C | 2.63803400  | 0.21225300  | -1.87727600 |
| C | 2.40764300  | 0.75935900  | -3.13799400 |
| C | 3.02649600  | 1.95507000  | -3.47680500 |
| C | 3.82807700  | 2.64226600  | -2.55469000 |
| C | 4.08885600  | 2.06248300  | -1.29792600 |
| H | 2.51510600  | -1.12120600 | 3.11759600  |
| H | 4.91766600  | -1.47211800 | 3.70469300  |
| H | 1.76682300  | 0.23801400  | -3.84044300 |
| H | 2.86541000  | 2.38081300  | -4.46448600 |
| O | 1.63116700  | -0.19061800 | 0.86106500  |
| O | 1.95489700  | -0.96812500 | -1.55135500 |
| P | 0.83887000  | -1.01965300 | -0.32571600 |
| C | 0.20212300  | -3.76325700 | 2.59133500  |
| C | 1.55292100  | -3.82865800 | 2.55597700  |
| H | -0.27588900 | -3.76693400 | 3.56915400  |
| H | 2.07185700  | -3.87600700 | 3.51174200  |
| N | 0.86845300  | -2.68627100 | -0.03994800 |
| C | 2.40302100  | -3.99490400 | 1.37779500  |
| C | 3.59937800  | -4.72634600 | 1.50159000  |
| C | 4.40865900  | -4.98186100 | 0.40017100  |
| C | 4.03866800  | -4.50324100 | -0.85976900 |
| C | 2.86905400  | -3.75924200 | -1.00613600 |

|   |             |             |             |
|---|-------------|-------------|-------------|
| C | 2.06625700  | -3.48535300 | 0.10484000  |
| H | 3.87671300  | -5.11219500 | 2.47912400  |
| H | 5.32092600  | -5.55872200 | 0.52030800  |
| H | 4.66036000  | -4.70486200 | -1.72714700 |
| H | 2.57955600  | -3.36987600 | -1.97468100 |
| C | -2.74885700 | -4.82977700 | 0.51673100  |
| C | -1.92387500 | -4.55935400 | 1.60434600  |
| C | -0.69833600 | -3.88314900 | 1.44488100  |
| C | -0.35953700 | -3.41762900 | 0.15521900  |
| C | -1.18414200 | -3.69647900 | -0.93852400 |
| C | -2.37221000 | -4.40912800 | -0.76426900 |
| H | -3.66575600 | -5.39401700 | 0.66245400  |
| H | -2.20016300 | -4.91416000 | 2.59379900  |
| H | -0.88695700 | -3.35781200 | -1.92495500 |
| H | -2.97955800 | -4.66068400 | -1.63025700 |
| C | 7.09544500  | -1.13421100 | 2.17283300  |
| H | 7.46913300  | -0.31181700 | 2.80188700  |
| H | 7.11891600  | -2.02864200 | 2.80733100  |
| C | 8.03159500  | -1.30348300 | 0.97234600  |
| H | 9.07199800  | -1.34258400 | 1.31463800  |
| H | 7.82532900  | -2.25913100 | 0.47033700  |
| C | 7.82188000  | -0.15517400 | -0.01689000 |
| H | 8.03158600  | 0.80091000  | 0.48386100  |
| H | 8.52104100  | -0.22993000 | -0.85785700 |
| C | 6.38440300  | -0.15979100 | -0.55034000 |
| H | 6.21332300  | 0.71853900  | -1.17599800 |
| H | 6.26014500  | -1.02243000 | -1.22377500 |
| C | 4.84383300  | 2.86116600  | -0.23977500 |
| H | 4.09047300  | 3.28087800  | 0.44519800  |
| H | 5.46216700  | 2.20995500  | 0.38034100  |
| C | 5.68832400  | 4.00937700  | -0.80485700 |
| H | 6.05915400  | 4.62631100  | 0.02173000  |
| H | 6.57252100  | 3.60548300  | -1.31854400 |
| C | 4.86874300  | 4.84787900  | -1.78765000 |

|   |             |             |             |
|---|-------------|-------------|-------------|
| H | 5.44753700  | 5.70385700  | -2.15278800 |
| H | 3.98763400  | 5.25567100  | -1.27258000 |
| C | 4.42702500  | 3.97847600  | -2.96862700 |
| H | 3.70968600  | 4.51901300  | -3.59840300 |
| H | 5.29884700  | 3.78221200  | -3.61122200 |
| C | -1.37478800 | 4.73614100  | -2.24653000 |
| C | -0.93834700 | 3.44417300  | -2.52545500 |
| C | -1.76680800 | 2.31895400  | -2.33364100 |
| C | -3.05722800 | 2.52431400  | -1.77798200 |
| C | -3.47424600 | 3.82804400  | -1.49366100 |
| C | -2.65815800 | 4.93393000  | -1.73875700 |
| H | -0.71649700 | 5.58075600  | -2.42705400 |
| H | 0.06108300  | 3.29272100  | -2.92462600 |
| H | -4.46325300 | 3.97822400  | -1.06896500 |
| H | -3.01925500 | 5.93484100  | -1.52140600 |
| C | -1.19546800 | 1.03420600  | -2.77614500 |
| H | -0.13959300 | 1.11068300  | -3.02338800 |
| C | -1.80346600 | -0.14451900 | -3.12241100 |
| H | -2.87004100 | -0.29153000 | -2.99547200 |
| C | -4.01537400 | 1.40061800  | -1.48491400 |
| H | -4.34858700 | 0.91695900  | -2.41279600 |
| H | -4.90262700 | 1.79783500  | -0.98389100 |
| O | -3.42752500 | 0.40847000  | -0.61612100 |
| H | -3.94726000 | -0.43019300 | -0.72499100 |
| C | -1.11751700 | -1.21311900 | -3.83417000 |
| H | -0.04241200 | -1.11003100 | -3.97031700 |
| C | -1.75050300 | -2.27555100 | -4.36040600 |
| H | -2.82454000 | -2.40783600 | -4.25033400 |
| H | -1.21868800 | -3.03073800 | -4.93085800 |
| C | -6.01327400 | -2.38536400 | -1.34394600 |
| O | -4.62986200 | -1.91498700 | -1.29173400 |
| H | -4.05624400 | -2.64886200 | -1.00655800 |
| C | -6.39621400 | -2.97175300 | 0.01886800  |
| H | -7.43898200 | -3.30722800 | 0.01812300  |



|   |             |             |             |
|---|-------------|-------------|-------------|
| H | -5.76955100 | -3.83798500 | 0.26413400  |
| H | -6.27344500 | -2.22185000 | 0.80640000  |
| C | -6.84961800 | -1.14731600 | -1.66693500 |
| H | -6.52907200 | -0.70038900 | -2.61437400 |
| H | -7.90614500 | -1.41760500 | -1.76067900 |
| H | -6.75922300 | -0.39856100 | -0.87260000 |
| C | -6.12387700 | -3.43259400 | -2.45822800 |
| H | -7.15601000 | -3.78412300 | -2.56159300 |
| H | -5.80723000 | -3.00963900 | -3.41735500 |
| H | -5.49796200 | -4.30731200 | -2.24220200 |
